# Supplementary material for: A Field Guide to Pandemic, Epidemic and Sporadic Clones of Methicillin-Resistant Staphylococcus aureus
Source: PLoS One. 2011 Apr 6;6(4):e17936. doi: 10.1371/journal.pone.0017936 (PMC3071808; doi:10.1371/journal.pone.0017936)
Supplement: File S4 — "nexus"-file used for the network graph based on concatenated MLST sequences (Figure 4). (NEX) [file pone.0017936.s004.nex]

#nexus

BEGIN Taxa;
DIMENSIONS ntax=87;
TAXLABELS
[1] 'ST1303'
[2] 'ST1304'
[3] 'ST75'
[4] 'ST883'
[5] 'ST239'
[6] 'ST30'
[7] 'ST36'
[8] 'ST39'
[9] 'ST982'
[10] 'ST154'
[11] 'ST6'
[12] 'ST20'
[13] 'ST361'
[14] 'ST672'
[15] 'ST1048'
[16] 'ST1774'
[17] 'ST426'
[18] 'ST45'
[19] 'ST121'
[20] 'ST577'
[21] 'ST93'
[22] 'ST1'
[23] 'ST1005'
[24] 'ST111'
[25] 'ST1115'
[26] 'ST12'
[27] 'ST125'
[28] 'ST1336'
[29] 'ST1337'
[30] 'ST149'
[31] 'ST22'
[32] 'ST221'
[33] 'ST225'
[34] 'ST228'
[35] 'ST496'
[36] 'ST5'
[37] 'ST526'
[38] 'ST573'
[39] 'ST575'
[40] 'ST72'
[41] 'ST728'
[42] 'ST73'
[43] 'ST772'
[44] 'ST80'
[45] 'ST835'
[46] 'ST872'
[47] 'ST930'
[48] 'ST998'
[49] 'ST15'
[50] 'ST912'
[51] 'ST188'
[52] 'ST247'
[53] 'ST250'
[54] 'ST254'
[55] 'ST359'
[56] 'ST398'
[57] 'ST576'
[58] 'ST583'
[59] 'ST59'
[60] 'ST609'
[61] 'ST612'
[62] 'ST7'
[63] 'ST779'
[64] 'ST8'
[65] 'ST834'
[66] 'ST87'
[67] 'ST9'
[68] 'ST94'
[69] 'ST952'
[70] 'ST953'
[71] 'ST97'
[72] 'ST985'
[73] 'ST995'
[74] 'ST129'
[75] 'ST255'
[76] 'ST257'
[77] 'ST78'
[78] 'ST88'
[79] 'ST152'
[80] 'ST1633'
[81] 'ST377'
[82] 'ST207'
[83] 'ST240'
[84] 'ST241'
[85] 'ST913'
[86] 'ST914'
[87] 'ST1117'
;
END; [Taxa]

BEGIN Characters;
DIMENSIONS nchar=3198;
FORMAT
	datatype=DNA
	missing=?
	gap=-
	symbols="atgc"
	labels=no
	transpose=no
	interleave=no
;
MATRIX
ttattaatacaacaagctaattctaacagtgacacaacaccagcaatgccccttgatacttgtggtgctatgtcgcagggtatgataggctattggttggaaactgaaatcaatcgcattttaactgaaatgaatagtgataggacggttgggacgattgttactcgtgtagaagtagacaaagatgatccgcgatttgataatccaacaaagccaattggcccattttatactaaggatgaagttgaagtattacaaaaagaacaacctgagtcagtctttaaagaagatgcaggtcgcggttatagaaaagtggtcgcatcaccattacctcaatctatactagaacaccagttaattcgaactttagcagacggtaaagatatcgtcattgcatgcggtggtggcggtattccagttataaaaaaagaaaatacctatgaaggtgttgaagcgaattttaattctttaggattagatgatacttatgaagctttaaatattccaattgaagattttcatttaattaaagaaattatttcgaaaaaagaattagatggctttaatatcacaattcctcataaagaacgtatcataccgtatttagattatgttgatgaacaagcgattaatgcaggtgcagttaacactgttttgataaaagatggcaagtggatagggtataatacagatggtattggttatgttaaaggattgcacagcgtttatccagatttagaaaatgcatacattttaattttgggcgcaggtggtgcaagtaaaggtattgcttatgaattagcaaaatttgtaaagcccaaattaactgttgcgaatagaacgatggctcgttttgaatcttggaatttaaatataaaccaaatttcattagcagatgctgaaaagtatttaggcgctgattggatcgttatcactgctggatggggattagcggttacaatgggtgtgtatgcagtcggtcaattctctggtgcacatttaaacccagcggtatctttagcacttgcattagatggaagtttcgattgggcattagttcctggttatattgttgcacaaatgttaggtgcgattgtcggagcaacgattgtatggttaatgtacttaccacattggaaagcaacagaggaagcgggtgcaaaattaggtgcattctcaactgcgccagcaattaagaactattttgcaaactttttgagtgagattattggtacaatggcgttaactttaggtattttatttattggtgtgaataaaattgctgatggattaaatcctttaatcgtaggcgcattaattgtagcaattggtttaagtttaggtggcgcaacaggttatgcaatcaaccctgctcgtcgaatatttgaagatccaactacatcatataagtactctatttcaatgacaacacgccaaatgcgcgaaggcgaagttgatggcgtagattacttttttaaaacaagggatgcgtttgaagctttaattaaagatgatcaatttatagaatatgccgagtatgttggcaactattatggtacaccagttcaatatgttaaagatactatggacgaaggacatgatgtatttttagaaattgaagtagagggtgcaaagcaagttagaaagaaatttcctgatgcgttatttatattcttagcacctccaagtttagaacacttgagagagcgattagtaggaagaggcacagaatctgacgaaaaaattcaaagtcgcattaacgaagcacgtaaagaagttgaaatgatgaacttatacgattacgttgcaacacaattgcaacaaacagattacgtaacaccaatcgtgttgggtgatgtagaaaaggttcaatctctagcacaaaaactaaaccttgatattactaatattgagttgattaaccctgcaacaagtgagttaaaagctgaattagttcaatcatttgttgaacgtcgtaaaggtaaagctactgaagaacaagcgcaagaattactaaacaatgtaaattacttcggaacgatgttagtatatgccggtaaagctgatggcttagtaagtggtgcagcacattcaactggtgatactgtacgtccagctttacaaatcatcaaaacgaaaccaggtgtatcaagaacatcaggtatcttctttatgattaaaggtgatgaacaatacatctttggtgattgtgcaatcaatccagaacttgattcacaaggacttgcggaaattgcagtagaaagtgcaaaatcagcattacatgaaactgatgaagaaatcaacaaaaaagcgcacgcgattttcaaacatggtatgactccaattatttgtgttggtgaaactgatgaagaacgtgaaagtggcaaagctaacgatgttgtaggtgaacaagttaagaaagctgttgcaggtttatctgaagatcaacttaaagcaactgtcattgcttatgagccaatctgggcaatcggaactggtaaatcatcaacatctgaagatgcgaatgaaatgtgtgcatttgtacgtcaaacaattgctgacctatcaagcaaagaagtatcagaagctacacgtattcaatatggtggtagtgtaaaacctaacaacattaaagaatatatggcacaaactgatatcgatggtgcattagtaggtggcgcagcattcaaagatgtaccagcctatgatttaggtgcgactttaatagaacatattattaaagaaacacgtttgaatcctagtgacattgatgaagtcattattggtaatgtacttcaagcaggacaaggacaaaatccagctcgtattgctgccatgaaaggcggtttgccagaaacagtacctgcatttacggtgaataaagtatgtggttcaggattgaagtcaattcaactagcgtatcaatctatcttgactggtgaaaatgatgtcgtgatagctggtggtatggagaacatgtctcaatcaccaatgcttgtcaataacggtcgctttggttttaagatgggtcatcaaacaatgattgatagcatggtatatgatggattaacggatgtatttaaccaatatcatatgggtattactgctgagaatttagtagagcaatatgatatttcaagagaagaacaagatacatttgctgttaattctcaaagaaaggcagcaaatgcacaacaa
ttattaatacaacaagctaattctaacagtgacacaacaccagcaatgccccttgatacttgtggtgctatgtcgcagggtatgataggctattggttggaaactgaaatcaatcgcattttaactgaaatgaatagtgataggacggttgggacgattgttactcgtgtagaagtagataaagatgatccgcgatttgataatccaacaaagccaattggcccattttatactaaggatgaagttgaagtattacaaaaagaacaacctgagtcagtctttaaagaagatgcaggtcgcggttatagaaaagtggtcgcatcaccattacctcaatctatactagaacaccagttaattcgaactttagcagacggtaaagatatcgtcattgcatgcggtggtggcggtattccagttataaaaaaagaaaatacctatgaaggtgttgaagcgaattttaattctttaggattagatgatacttatgaagctttaaatattccaattgaagattttcatttaattaaagaaattatttcgaaaaaagaattagatggctttaatatcacaattcctcataaagaacgtatcataccgtatttagatcatgttgatgaacaagcgattaatgcaggtgcagttaacactgttttgataaaagatggcaagtggatagggtataatacagatggtattggttatgttaaaggattgcacagcgtttatccagatttagaaaatgcatacattttaattttgggcgcaggtggtgcaagtaaaggtattgcttatgaattagcaaaatttgtaaagcccaaattaactgttgcgaatagaacgatggctcgttttgaatcttggaatttaaatataaaccaaatttcattggcagatgctgaaaagtatttaggcgctgattggatcgttatcactgctggatggggattagcggttacaatgggtgtgtatgcagtcggtcaattctctggtgcacatttaaacccagcggtatctttagcacttgcattagatggaagtttcgattgggcattagttcctggttatattgttgcacaaatgttaggtgcgattgtcggagcaacgattgtatggttaatgtacttaccacattggaaagcaacagaggaagcgggcgcaaaattaggtgtattctcaactgcgccagcaattaagaactattttgcaaactttttgagtgagattattggtacaatggcgttaactttaggtattttatttattggtgtaaacaaaattgctgatggattaaatcctttaatcgtaggcgcattaattgtagcaattggtttaagtttaggtggcgcaacaggttatgcaatcaaccctgctcgtcgaatatttgaagatccaactacatcatataagtattctatttcaatgacaacacgccaaatgcgcgaaggcgaagttgatggcgtagattacttttttaaaacaagggatgcgtttgaagctttaattaaagatgatcaatttatagaatatgccgagtatgttggcaactattatggtacaccagttcaatatgttaaagatactatggacgaaggacatgatgtatttttagaaattgaagtagagggtgcaaagcaagttagaaagaaatttcctgatgcgttatttatattcttagcacctccaagtttagatcacttgagagagcgattagtaggaagaggcacagaatctgacgaaaaaattcaaagtcgcattaacgaagcacgtaaagaagttgaaatgatgaacttatacgattacgttgcaacacaattgcaacaaacagattacgtaacaccaatcgtgttgggtgatgtagaaaaggttcaatctctagcacaaaaactaaaccttgatattactaatattgagttgattaaccctgcaacaagtgagttaaaagctgaattagttcaatcatttgttgaacgtcgtaaaggtaaagctactgaagaacaagcgcaagaattactaaataatgtaaattacttcggaacgatgttagtatatgccggtaaagctgatggcttagtaagtggtgcagcacattcaactggtgatactgtacgtccagctttacaaatcatcaaaacgaaaccaggtgtatcaagaacatcaggtatcttctttatgattaaaggtgatgaacaatacatctttggtgattgtgcaatcaatccagaacttgattcacaaggacttgcagaaattgcagtagaaagtgctaaatcagcattacatgaaactgatgaagaaatcaacaaaaaagcgcacgcgattttcaaacatggtatgactccaattatttgtgttggtgaaactgatgaagaacgtgaaagtggcaaagctaacaatgttgtaggtgaacaagttaagaaagctgttgcaggtttatctgaagatcaacttaaagcaactgtgattgcttatgagccaatctgggcaataggaactggtaaatcatcaacatctgaagatgcgaatgaaatgtgtgcatttgtacgtcaaacaattgctgacctatcaagcaaagaagtatcagaagctacacgtattcaatatggtggtagtgtaaaacctaacaacattaaagaatatatggcacaaactgatatcgatggtgcattagtaggtggcgcagcattcaaagatgtaccagcctatgatttaggtgcgactttaatagaacatattattaaagaaactagtttgaatcctagtgacattgatgaagtcattattggtaatgtacttcaagcaggacaaggacaaaatccagctcgtattgctgctatgaaaggcggtttgccagaaacagtacctgcatttacggtgaataaagtatgtggttcaggattgaagtcaattcaactagcgtatcaatctatcttgactggtgaaaatgatgtcgtgatagctggtggcatggagaacatgtctcaatcaccaatgcttgtcaataacggtcgctttggttttaagatgggtcatcaaacgatgattgatagcatggtatatgatggattaacggatgtatttaaccaataccatatgggtattactgctgagaatttagtagaacaatatgaaattacaagagaagaacaagatacatttgctgttaattctcaaagaaaggcggcaaatgcgcaacaa
ttattaatacaacaagctaattctaacagtgacacaacaccagcaatgccccttgatacttgtggtgctatgtcgcagggtatgataggctattggttggaaactgaaatcaatcgcattttaactgaaatgaatagtgataggacggttgggacgattgttactcgtgtagaagtagataaagatgatccgcgatttgataatccaacaaagccaattggcccattttatactaaggatgaagttgaagtattacaaaaagaacaacctgagtcagtctttaaagaagatgcaggtcgcggttatagaaaagtggtcgcatcaccattacctcaatctatactagaacaccagttaattcgaactttagcagacggtaaagatatcgtcattgcatgcggtggtggcggtattccagttataaaaaaagaaaatacctatgaaggtgttgaagcgaattttaattctttaggattagatgatacttatgaagctttaaatattccaattgaagattttcatttaattaaagaaattatttcgaaaaaagaattagaaggctttaatatcacaattcctcataaagaacgtatcataccgtatttagattatgttgatgaacaagcgattaatgcaggtgcagttaacactgttttgataaaagatggcaagtggatagggtataatacagatggtattggttatgttaaaggattgcacagcgtttatccagatttagaaaatgcatacattttaattttgggcgcaggtggtgcaagtaaaggtattgcttatgaattagcaaaatttgtaaagcccaaattaactgttgcgaatagaacgatggctcgttttgaatcttggaatttaaatataaaccaaatttcattagcagatgctgaaaagtatttaggcgctgattggatcgttatcactgctggatggggattagcggttacaatgggtgtgtatgcagtcggtcaattctctggtgcacatttaaacccagcggtatctttagcacttgcattagatggaagtttcgattgggcattagttcctggttatattgttgcacaaatgttaggtgcgattgtcggagcaacgattgtatggttaatgtacttaccacattggaaagcaacagaggaagcgggcgcaaaattaggtgtattctcaactgcgccagcaattaagaactattttgcaaactttttgagtgagattattggtacaatggcgttaactttaggtattttatttattggtgtaaacaaaattgctgatggattaaatcctttaatcgtaggcgcattaattgtagcaattggtttaagtttaggtggcgcaacaggttatgcaatcaaccctgctcgtcgaatatttgaagatccaactacatcatataagtattctatttcaatgacaacacgccaaatgcgcgaaggcgaagttgatggcgtagattacttttttaaaacaagggatgcgtttgaagctttaattaaagatgatcaatttatagaatatgccgagtatgttggcaactattatggtacaccagttcaatatgttaaagatactatggacgaaggacatgatgtatttttagaaattgaagtagagggtgcaaagcaagttagaaagaaatttcctgatgcgttatttatattcttagcacctccaagtttagatcacttgagagagcgattagtaggaagaggcacagaatctgacgaaaaaattcaaagtcgcattaacgaagcacgtaaagaagttgaaatgatgaacttatacgattacgttgcaacacaattgcaacaaacagattacgtaacaccaatcgtgttgggtgatgtagaaaaggttcaatctctagcacaaaaactaaaccttgatattactaatattgagttgattaaccctgcaacaagtgagttaaaagctgaattagttcaatcatttgttgaacgtcgtaaaggtaaagctactgaagaacaagcgcaagaattactaaataatgtaaattacttcggaacgatgttagtatatgccggtaaagctgatggcttagtaagtggtgcagcacattcaactggtgatactgtacgtccagctttacaaatcatcaaaacgaaaccaggtgtatcaagaacatcaggtatcttctttatgattaaaggtgatgaacaatacatctttggtgattgtgcaatcaatccagaacttgattcacaaggacttgcagaaattgcagtagaaagtgctaaatcagcattacatgaaactgatgaagaaatcaacaaaaaagcgcacgcgattttcaaacatggtatgactccaattatttgtgttggtgaaactgatgaagaacgtgaaagtggcaaagctaacaatgttgtaggtgaacaagttaagaaagctgttgcaggtttatctgaagatcaacttaaagcaactgtgattgcttatgagccaatctgggcaataggaactggtaaatcatcaacatctgaagatgcgaatgaaatgtgtgcatttgtacgtcaaacaattgctgacctatcaagcaaagaagtatcagaagctacacgtattcaatatggtggtagtgtaaaacctaacaacattaaagaatatatggcacaaactgatatcgatggtgcattagtaggtggcgcagcattcaaagatgtaccagcctatgatttaggtgcgactttaatagaacatattattaaagaaactagtttgaatcctagtgacattgatgaagtcattattggtaatgtacttcaagcaggacaaggacaaaatccagctcgtattgctgctatgaaaggcggtttgccagaaacagtacctgcatttacggtgaataaagtatgtggttcaggattgaagtcaattcaactagcgtatcaatctatcttgactggtgaaaatgatgtcgtgatagctggtggcatggagaacatgtctcaatcaccaatgcttgtcaataacggtcgctttggttttaagatgggtcatcaaacgatgattgatagcatggtatatgatggattaacggatgtatttaaccaataccatatgggtattactgctgagaatttagtagaacaatatgaaattacaagagaagaacaagatacatttgctgttaattctcaaagaaaggcggcaaatgcgcaacaa
ttattaatacaacaagctaattctaacagtgacacaacaccagcaatgccccttgatacttgtggtgctatgtcgcagggtatgataggctattggttggaaactgaaatcaatcgcattttaactgaaatgaatagtgataggacggttgggacgattgttactcgtgtagaagtagataaagatgatccgcgatttgataatccaacaaagccaattggcccattttatactaaggatgaagttgaagtattacaaaaagaacaacctgagtcagtctttaaagaagatgcaggtcgcggttatagaaaagtggtcgcatcaccattacctcaatctatactagaacaccagttaattcgaactttagcagacggtaaagatatcgtcattgcatgcggtggtggcggtattccagttataaaaaaagaaaatacctatgaaggtgttgaagcgaattttaattctttaggattagatgatacttatgaagctttaaatattccaattgaagattttcatttaattaaagaaattatttcgaaaaaagaattagatggctttaatatcacaattcctcataaagaacgtatcataccgtatttagattatgttgatgaacaagcgattaatgcaggtgcagttaacactgttttgataaaagatggcaagtggatagggtataatacagatggtattggttatgttaaaggattgcacagcgtttatccagatttagaaaatgcatacattttaattttgggcgcaggtggtgcaagtaaaggtattgcttatgaattagcaaaatttgtaaagcccaaattaactgttgcgaatagaacgatggctcgttttgaatcttggaatttaaatataaaccaaatttcattggcagatgctgaaaagtatttaggcgctgattggatcgttatcactgctggatggggattagcggttacaatgggtgtgtatgcagtcggtcaattctctggtgcacatttaaacccagcggtatctttagcacttgcattagatggaagtttcgattgggcattagttcctggttatattgttgcacaaatgttaggtgcgattgtcggagcaacgattgtatggttaatgtacttaccacattggaaagcaacagaggaagcgggcgcaaaattaggtgtattctcaactgcgccagcaattaagaactattttgcaaactttttgagtgagattattggtacaatggcgttaactttaggtattttatttattggtgtaaacaaaattgctgatggattaaatcctttaatcgtaggcgcattaattgtagcaattggtttaagtttaggtggcgcaacaggttatgcaatcaaccctgctcgtcgaatatttgaagatccaactacatcatataagtattctatttcaatgacaacacgccaaatgcgcgaaggcgaagttgatggcgtagattacttttttaaaacaagggatgcgtttgaagctttaattaaagatgatcaatttatagaatatgccgagtatgttggcaactattatggtacaccagttcaatatgttaaagatactatggacgaaggacatgatgtatttttagaaattgaagtagagggtgcaaagcaagttagaaagaaatttcctgatgcgttatttatattcttagcacctccaagtttagatcacttgagagagcgattagtaggaagaggcacagaatctgacgaaaaaattcaaagtcgcattaacgaagcacgtaaagaagttgaaatgatgaacttatacgattacgttgcaacacaattgcaacaaacagattacgtaacaccaatcgtgttgggtgatgtagaaaaggttcaatctctagcacaaaaattaaaccttgatattactaatattgagttgattaaccctgtaacaagtgagttaaaagctgaattagttcaatcatttgttgaacgtcgtaaaggtaaagctactgaagaacaagcgcaagaattactaaataatgtaaattacttcggaacgatgttagtatatgccggtaaagctgatggcttagtaagtggtgcagcacattcaactggtgatactgtacgtccagctttacaaatcatcaaaacgaaaccaggtgtatcaagaacatcaggtatcttctttatgattaaaggtgatgaacaatacatctttggtgattgtgcaatcaatccagaacttgattcacaaggacttgcggaaattgcagtagaaagtgctaaatcagcattacatgaaactgatgaagaaatcaacaaaaaagcgcacgcgattttcaaacatggtatgactccaattatttgtgttggtgaaactgatgaagaacgtgagagcggcaaagctaacgatgttgtaggtgaacaagttaagaaagctgttgcaggtttatctgaagatcaacttaaagcaactgtgattgcttatgagccaatctgggcaatcggaactggtaaatcatcaacatctgaagatgcgaatgaaatgtgtgcatttgtacgtcaaacaattgctgacctatcaagcaaagaagtatcagaagctacacgtattcaatatggtggtagtgtaaaacctaacaacattaaagaatatatggcacaaactgatatcgatggtgcattagtaggtggcgcagcattcaaagatgtaccagcctatgatttaggtgcgactttaatagaacatattattaaagaaacacgtttgaatcctagtgacattgatgaagtcattattggtaatgtacttcaagcaggacaaggacaaaatccagctcgtattgctgccatgaaaggcggtttgccagaaacagtacctgcatttacggtgaataaagtatgtggttcaggattgaagtcaattcaactagcgtatcaatctatcttgactggtgaaaatgatgtcgtgatagctggtggcatggagaacatgtctcaatcaccaatgcttgtcaataacggtcgctttggttttaagatgggtcatcaaacgatgattgatagcatggtatatgatggattaacggatgtatttaaccaatatcatatgggtattactgctgagaatttagtagagcaatatgatatttcaagagaagaacaagatacatttgctgttaattctcaaagaaaggcagcaaatgcgcaacaa
ttattaatccaacaagctaaatcgaacagtgacacaacgccggcaatgccattggatacttgtggtgcaatgtcacaaggtatgataggctattggttggaaactgaaatcaatcgcattttaactgaaatgaatagtgatagaactgtaggcacaatcgtaacacgtgtggaagtagataaagatgatccacgatttgataacccaactaaaccaattggtcctttttatacgaaagaagaagttgaagaattacaaaaagaacagccaggctcagtctttaaagaagatgcaggacgtggttatagaaaagtagttgcgtcaccactacctcaatctatactagaacaccagttaattcgaactttagcagacggtaaaaatattgtcattgcatgcggtggtggcggtattccagttataaaaaaagaaaatacctatgaaggtgttgaagcgaattttaattctttaggattagatgatacttatgaagctttaaatattccaattgaagattttcatttaattaaagaaattatttcgaaaaaagaattagaaggctttaatatcacaattcctcataaagaacgtatcataccgtatttagattatgttgatgaacaagcgattaatgcaggtgcagttaacactgttttgataaaagatggcaagtggatagggtataatacagatggtattggttatgttaaaggattgcacagcgtttatccagatttagaaaatgcatacattttaattttgggcgcaggtggtgcaagtaaaggtattgcttatgaattagcaaaatttgtaaagcccaaattaactgttgcgaatagaacgatggctcgttttgaatcttggaatttaaatataaaccaaatttcattagcagatgctgaaaagtatttaggtgctgattggattgtcatcacagctggatggggattagcggttacaatgggtgtgtttgctgtcggtcaattctcaggtgcacatttaaacccagcggtgtctttagctcttgcattagacggaagttttgattggtcattagttcctggttatattgttgctcaaatgttaggtgcaattgtcggagcaacaattgtatggttaatgtacttgccacattggaaagcgacagaagaagctggcgcgaaattaggtgttttctctacagcaccggctattaagaattactttgccaactttttaagtgagattatcggaacaatggcattaactttaggtattttatttatcggtgtaaacaaaattgccgatggtttaaatcctttaattgtcggagcattaattgttgcaatcggattaagtttaggcggtgctactggttatgcaatcaacccagcacgtcgaatatttgaagatccaagtacatcatataagtattctatttcaatgacaacacgtcaaatgcgtgaaggtgaagttgatggcgtagattacttttttaaaactagggatgcgtttgaagctttaatcaaagatgaccaatttatagaatatgctgaatatgtaggcaactattatggtacaccagttcaatatgttaaagatacaatggacgaaggtcatgatgtatttttagaaattgaagtagaaggtgcaaagcaagttagaaagaaatttccagatgcgctatttattttcttagcacctccaagtttagaacacttgagagagcgattagtaggtagaggaacagaatctgatgagaaaatacaaagtcgtattaacgaagcgcgtaaagaagttgaaatgatgaatttatacgattacgttgcaacacaattacaagcaacagattatgttacaccaatcgtgttaggtgatgagactaaggttcaatctttagcgcaaaaacttgatcttgatatttctaatattgaattaattaatcctgcgacaagtgaattgaaagctgaattagttcaatcatttgttgaacgacgtaaaggtaaagcgactgaagaacaagcacaagaattattaaacaatgtgaactacttcggtacaatgcttgtttatgctggtaaagcagatggtttagttagtggtgcagcacattcaacaggcgacactgtgcgtccagctttacaaatcatcaaaacgaaaccaggtgtatcaagaacatcaggtatcttctttatgattaaaggtgatgaacaatacatctttggtgattgtgcaatcaatccagaacttgattcacaaggacttgcagaaattgcagtagaaagtgcaaaatcagcattacacgaaacagatgaagaaattaacaaaaaagcgcacgctattttcaaacatggaatgactccaattatatgtgttggtgaaacagacgaagagcgtgaaagtggtaaagctaacgatgttgtaggtgagcaagttaagaaagctgttgcaggtttatctgaagatcaacttaaatcagttgtaattgcttatgaaccaatctgggcaatcggaactggtaaatcatcaacatctgaagatgcaaatgaaatgtgtgcatttgtacgtcaaactattgctgacttatcaagcaaagaagtatcagaagcaactcgtattcaatatggtggtagtgttaaacctaacaacattaaagaatacatggcacaaactgatattgatggggcattagtaggtggcgcagcgtttaaagacgtgccagcctatgatttaggtgcgactttaatagaacatattattaaagagacgggtttgaatccaagtgagattgatgaagttatcatcggtaacgtactacaagcaggacaaggacaaaatccagcacgaattgctgctatgaaaggtggcttgccagaaacagtacctgcatttacggtgaataaagtatgtggttctgggttaaagtcgattcaattagcatatcaatctattgtgactggtgaaaatgacatcgtgctagctggcggtatggagaatatgtctcaatcaccaatgcttgtcaacaacagtcgctttggttttaaaatgggacatcaatcaatggttgatagcatggtatatgatggtttaacagatgtatttaatcaatatcatatgggtattactgctgaaaatttagtagagcaatatggtatttcaagagaagaacaagatacatttgctgtaaactcacaacaaaaagcagtacgtgcacagcaa
ttattaatccaacaagctaaatcgaacagtgacacaacgccggcaatgccattggatacttgtggtgcaatgtcacaaggtatgataggctattggttggaaactgaaatcaatcgcattttaactgaaatgaatagtgatagaactgtaggcacaatcgtaacacgtgtggaagtagataaagatgatccacgatttgataacccaactaaaccaattggtcctttttatacgaaagaagaagttgaagaattacaaaaagaacagccaggctcagtctttaaagaagatgcaggacgtggttatagaaaagtagttgcgtcaccactacctcaatctatactagaacaccagttaattcgaactttagcagacggtaaaaatattgtcattgcatgcggtggtggcggtattccagttataaaaaaagaaaatacctatgaaggtgttgaagcgaattttaattctttaggattagatgatacttatgaagctttaaatattccaattgaagattttcatttaattaaagaaattatttcaaaaaaagaattagatggctttaatatcacaattcctcataaagagcgtatcataccgtatttagatcatgttgatgaacaagcgattaatgcaggtgcagttaacactgttttgataaaagatggcaagtggatagggtataatacagatggtattggttatgttaaaggattgcacagcgtttatccagatttagaaaatgcatacattttaattttgggagcaggtggtgcaagtaaaggtattgcttatgaattagcaaaatttgtaaagcccaaattaactgttgcgaatagaacgatggctcgttttgaatcttggaatttaaatataaaccaaatttcattggcagatgctgaaaagtatttaggtgctgattggattgtcatcacagctggatggggattagcggttacaatgggtgtgtatgctgttggtcaattctcaggtgcacatttaaacccagcggtgtctttagctcttgcattagacggaagttttgattggtcattagttcctggttatattgttgctcaaatgttaggtgcaattgtcggagcaacaattgtatggttaatgtacttgccacattggaaagcgacagaagaagctggcgcgaaattaggtgttttctctacagcaccggctattaagaattactttgccaactttttaagtgaaattatcggaacaatggcattaactttaggtattttatttatcggtgtaaacaaaattgctgatggtttaaatcctttaattgtcggagcattaattgttgcaatcggattaagtttaggcggtgctactggttatgcaatcaacccagcacgtcgaatatttgaagatccaagtacatcatataagtattctatttcaatgacaacacgtcaaatgcgtgaaggtgaagttgatggcgtagattacttttttaaaactagggatgcgtttgaagctttaattaaagatgaccaatttatagaatatgctgaatatgtaggcaactattatggtacaccagttcaatatgttaaagatacaatggacgaaggtcatgatgtatttttagaaattgaagtagaaggtgcaaagcaagttagaaagaaatttccagatgcgttatttattttcttagcacctccaagtttagatcacttgagagagcgattagtaggtagaggaacagaatctgatgagaaaatacaaagtcgtattaacgaagcacgtaaagaagtcgaaatgatgaatttatacgattacgttgcaacacaattacaagcaacagattatgttacaccaatcgtgttaggtgatgagactaaggttcaatctttagcgcaaaaacttaatcttgatatttctaatattgaattaattaatcctgcgacaagtgaattgaaagctgaattagttcaatcatttgttgaacgacgtaaaggtaaagcgactgaagaacaagcacaagaattattaaacaatgtgaactacttcggtacaatgcttgtttatgctggtaaagcagatggtttagttagtggtgcagcacattcaacaggcgacactgtgcgtccagctttacaaatcatcaaaacgaaaccaggtgtatcaagaacatcaggtatcttctttatgattaaaggtgatgaacagtacatctttggtgattgtgcaatcaatccagaacttgattcacaaggacttgcagaaattgcagtagaaagtgcaaaatcagcattacacgaaacagatgaagaaattaacaaaaaagcgcacgctattttcaaacatggaatgactccaattatttgtgttggtgaaacagacgaagagcgtgaaagtggtaaagctaacgatgttgtaggtgagcaagttaagaaagctgttgcaggtttatctgaagatcaacttaaatcagttgtaattgcttatgaaccaatctgggcaatcggaactggtaaatcatcaacatctgaagatgcgaatgaaatgtgtgcatttgtacgtcaaactattgctgacttatcaagcaaagaagtatcagaagcaactcgtattcaatatggtggtagtgttaaacctaacaacattaaagaatacatggcacaaactgatattgatggggcattagtaggtggcgcagcgtttaaagacgtgccagcctatgatttaggtgcgactttaatagaacatattattaaagagacgggtttgaatccaagtgagattaatgaagtcatcatcggtaacgtactacaagcaggacaaggacaaaatccagcacgaattgctgctatgaaaggtggcttgccagaaacagtacctgcatttacagtgaataaagtatgtggttctgggttaaagtcgattcaattagcatatcaatctattgtgactggtgaaaatgacatcgtgctagctggcggtatggagaatatgtctcaatcaccaatgcttgtcaacaacagtcgctttggttttaaaatgggacatcaatcaatggttgatagcatggtatatgatggtttaacagatgtatttaatcaatatcatatgggtattactgctgaaaatttagtagagcaatatggtatttcaagagaagaacaagatacatttgctgtaaactcacaacaaaaagcagtacgtgcacagcaa
ttattaatccaacaagctaaatcgaacagtgacacaacgccggcaatgccattggatacttgtggtgcaatgtcacaaggtatgataggctattggttggaaactgaaatcaatcgcattttaactgaaatgaatagtgatagaactgtaggcacaatcgtaacacgtgtggaagtagataaagatgatccacgatttgataacccaactaaaccaattggtcctttttatacgaaagaagaagttgaagaattacaaaaagaacagccaggctcagtctttaaagaagatgcaggacgtggttatagaaaagtagttgcgtcaccactacctcaatctatactagaacaccagttaattcgaactttagcagacggtaaaaatattgtcattgcatgcggtggtggcggtattccagttataaaaaaagaaaatacctatgaaggtgttgaagcgaattttaattctttaggattagatgatacttatgaagctttaaatattccaattgaagattttcatttaattaaagaaattatttcaaaaaaagaattagatggctttaatatcacaattcctcataaagagcgtatcataccgtatttagatcatgttgatgaacaagcgattaatgcaggtgcagttaacactgttttgataaaagatggcaagtggatagggtataatacagatggtattggttatgttaaaggattgcacagcgtttatccagatttagaaaatgcatacattttaattttgggagcaggtggtgcaagtaaaggtattgcttatgaattagcaaaatttgtaaagcccaaattaactgttgcgaatagaacgatggctcgttttgaatcttggaatttaaatataaaccaaatttcattggcagatgctgaaaagtatttaggtgctgattggattgtcatcacagctggatggggattagcggttacaatgggtgtgtatgctgttggtcaattctcaggtgcacatttaaacccagcggtgtctttagctcttgcattagacggaagttttgattggtcattagttcctggttatattgttgctcaaatgttaggtgcaattgtcggagcaacaattgtatggttaatgtacttgccacattggaaagcgacagaagaagctggcgcgaaattaggtgttttctctacagcaccggctattaagaattactttgccaactttttaagtgaaattatcggaacaatggcattaactttaggtattttatttatcggtgtaaacaaaattgctgatggtttaaatcctttaattgtcggagcattaattgttgcaatcggattaagtttaggcggtgctactggttatgcaatcaacccagcacgtcgaatatttgaagatccaagtacatcatataagtattctatttcaatgacaacacgtcaaatgcgtgaaggtgaagttgatggcgtagattacttttttaaaactagggatgcgtttgaagctttaattaaagatgaccaatttatagaatatgctgaatatgtaggcaactattatggtacaccagttcaatatgttaaagatacaatggacgaaggtcatgatgtatttttagaaattgaagtagaaggtgcaaagcaagttagaaagaaatttccagatgcgttatttattttcttagcacctccaagtttagatcacttgagagagcgattagtaggtagaggaacagaatctgatgagaaaatacaaagtcgtattaacgaagcacgtaaagaagtcgaaatgatgaatttatacgattacgttgcaacacaattacaagcaacagattatgttacaccaatcgtgttaggtgatgagactaaggttcaatctttagcgcaaaaacttaatcttgatatttctaatattgaattaattaatcctgcgacaagtgaattgaaagctgaattagttcaatcatttgttgaacgacgtaaaggtaaaacgactgaagaacaagcacaagaattattaaacaatgtgaactacttcggtacaatgcttgtttatgctggtaaagcagatggtttagttagtggtgcagcacattcaacaggcgacactgtgcgtccagctttacaaatcatcaaaacgaaaccaggtgtatcaagaacatcaggtatcttctttatgattaaaggtgatgaacagtacatctttggtgattgtgcaatcaatccagaacttgattcacaaggacttgcagaaattgcagtagaaagtgcaaaatcagcattacacgaaacagatgaagaaattaacaaaaaagcgcacgctattttcaaacatggaatgactccaattatttgtgttggtgaaacagacgaagagcgtgaaagtggtaaagctaacgatgttgtaggtgagcaagttaagaaagctgttgcaggtttatctgaagatcaacttaaatcagttgtaattgcttatgaaccaatctgggcaatcggaactggtaaatcatcaacatctgaagatgcgaatgaaatgtgtgcatttgtacgtcaaactattgctgacttatcaagcaaagaagtatcagaagcaactcgtattcaatatggtggtagtgttaaacctaacaacattaaagaatacatggcacaaactgatattgatggggcattagtaggtggcgcagcgtttaaagacgtgccagcctatgatttaggtgcgactttaatagaacatattattaaagagacgggtttgaatccaagtgagattaatgaagtcatcatcggtaacgtactacaagcaggacaaggacaaaatccagcacgaattgctgctatgaaaggtggcttgccagaaacagtacctgcatttacagtgaataaagtatgtggttctgggttaaagtcgattcaattagcatatcaatctattgtgactggtgaaaatgacatcgtgctagctggcggtatggagaatatgtctcaatcaccaatgcttgtcaacaacagtcgctttggttttaaaatgggacatcaatcaatggttgatagcatggtatatgatggtttaacagatgtatttaatcaatatcatatgggtattactgctgaaaatttagtagagcaatatggtatttcaagagaagaacaagatacatttgctgtaaactcacaacaaaaagcagtacgtgcacagcaa
ttattaatccaacaagctaaatcgaacagtgacacaacgccggcaatgccattggatacttgtggtgcaatgtcacaaggtatgataggctattggttggaaactgaaatcaatcgcattttaactgaaatgaatagtgatagaactgtaggcacaatcgtaacacgtgtggaagtagataaagatgatccacgatttgataacccaactaaaccaattggtcctttttatacgaaagaagaagttgaagaattacaaaaagaacagccaggctcagtctttaaagaagatgcaggacgtggttatagaaaagtagttgcgtcaccactacctcaatctatactagaacaccagttaattcgaactttagcagacggtaaaaatattgtcattgcatgcggtggtggcggtattccagttataaaaaaagaaaatacctatgaaggtgttgaagcgaattttaattctttaggattagatgatacttatgaagctttaaatattccaattgaagattttcatttaattaaagaaattatttcaaaaaaagaattagatggctttaatatcacaattcctcataaagagcgtatcataccgtatttagatcatgttgatgaacaagcgattaatgcaggtgcagttaacactgttttgataaaagatggcaagtggatagggtataatacagatggtattggttatgttaaaggattgcacagcgtttatccagatttagaaaatgcatacattttaattttgggagcaggtggtgcaagtaaaggtattgcttatgaattagcaaaatttgtaaagcccaaattaactgttgcgaatagaacgatggctcgttttgaatcttggaatttaaatataaaccaaatttcattggcagatgctgaaaagtatttaggtgctgattggattgtcatcacagctggatggggattagcggttacaatgggtgtgtatgctgttggtcaattctcaggtgcacatttaaacccagcggtgtctttagctcttgcattagacggaagttttgattggtcattagttcctggttatattgttgctcaaatgttaggtgcaattgtcggagcaacaattgtatggttaatgtacttgccacattggaaagcgacagaagaagctggcgcgaaattaggtgttttctctacagcaccggctattaagaattactttgccaactttttaagtgaaattatcggaacaatggcattaactttaggtattttatttatcggtgtaaacaaaattgctgatggtttaaatcctttaattgtcggagcattaattgttgcaatcggattaagtttaggcggtgctactggttatgcaatcaacccagcacgtcgaatatttgaagatccaagtacatcatataagtattctatttcaatgacaacacgtcaaatgcgtgaaggtgaagttgatggcgtagattacttttttaaaactagggatgcgtttgaagctttaattaaagatgaccaatttatagaatatgctgaatatgtaggcaactattatggtacaccagttcaatatgttaaagatacaatggacgaaggtcatgatgtatttttagaaattgaagtagaaggtgcaaagcaagttagaaagaaatttccagatgcgttatttattttcttagcacctccaagtttagatcacttgagagagcgattagtaggtagaggaacagaatctgatgagaaaatacaaagtcgtattaacgaagcacgtaaagaagtcgaaatgatgaatttatacgattacgttgcaacacaattacaagcaaccgattatgttacaccaatcgtgttaggtgatgagactaaggttcaatctttagcgcaaaaacttaatcttgatatttctaatattgaattaattaatcctgcgacaagtgaattgaaagctgaattagttcaatcatttgttgaacgacgtaaaggtaaagcgactgaagaacaagcacaagaattattaaacaatgtgaactacttcggtacaatgcttgtttatgctggtaaagcagatggtttagttagtggtgcagcacattcaacaggcgacactgtgcgtccagctttacaaatcatcaaaacgaaaccaggtgtatcaagaacatcaggtatcttctttatgattaaaggtgatgaacagtacatctttggtgattgtgcaatcaatccagaacttgattcacaaggacttgcagaaattgcagtagaaagtgcaaaatcagcattacacgaaacagatgaagaaattaacaaaaaagcgcacgctattttcaaacatggaatgactccaattatttgtgttggtgaaacagacgaagagcgtgaaagtggtaaagctaacgatgttgtaggtgagcaagttaagaaagctgttgcaggtttatctgaagatcaacttaaatcagttgtaattgcttatgaaccaatctgggcaatcggaactggtaaatcatcaacatctgaagatacgaatgaaatgtgtgcatttgtacgtcaaactattgctgacttatcaagcaaagaagtatcagaagcaactcgtattcaatatggtggtagtgttaaacctaacaacattaaagaatacatggcacaaactgatattgatggggcattagtaggtggcgcagcgtttaaagacgtgccagcctatgatttaggtgcgactttaatagaacatattattaaagagacgggtttgaatccaagtgagattaatgaagtcatcatcggtaacgtactacaagcaggacaaggacaaaatccagcacgaattgctgctatgaaaggtggcttgccagaaacagtacctgcatttacagtgaataaagtatgtggttctgggttaaagtcgattcaattagcatatcaatctattgtgactggtgaaaatgacatcgtgctagctggcggtatggagaatatgtctcaatcaccaatgcttgtcaacaacagtcgctttggttttaaaatgggacatcaatcaatggttgatagcatggtatatgatggtttaacagatgtatttaatcaatatcatatgggtattactgctgaaaatttagtagagcaatatggtatttcaagagaagaacaagatacatttgctgtaaactcacaacaaaaagcagtacgtgcacagcaa
ttattaatccaacaagctaaatcgaacagtgacacaacgccggcaatgccattggatacttgtggtgcaatgtcacaaggtatgataggctattggttggaaactgaaatcaatcgcattttaactgaaatgaatagtgatagaactgtaggcacaatcgtaacacgtgtggaagtagataaagatgatccacgatttgataacccaactaaaccaattggtcctttttatacgaaagaagaagttgaagaattacaaaaagaacagccaggctcagtctttaaagaagatgcaggacgtggttatagaaaagtagttgcgtcaccactacctcaatctatactagaacaccagttaattcgaactttagcagacggtaaaaatattgtcattgcatgcggtggtggcggtattccagttataaaaaaagaaaatacctatgaaggtgttgaagcgaattttaattctttaggattagatgatacttatgaagctttaaatattccaattgaagattttcatttaattaaagaaattatttcaaaaaaagaattagatggctttaatatcacaattcctcataaagagcgtatcataccgtatttagatcatgttgatgaacaagcgattaatgcaggtgcagttaacactgttttgataaaagatggcaagtggatagggtataatacagatggtattggttatgttaaaggattgcacagcgtttatccagatttagaaaatgcatacattttaattttgggagcaggtggtgcaagtaaaggtattgcttatgaattagcaaaatttgtaaagcccaaattaactgttgcgaatagaacgatggctcgttttgaatcttggaatttaaatataaaccaaatttcattggcagatgctgaaaagtatttaggtgctgattggattgtcatcacagctggatggggattagcggttacaatgggtgtgtatgctgttggtcaattctcaggtgcacatttaaacccagcggtgtctttagctcttgcattagacggaagttttgattggtcattagttcctggttatattgttgctcaaatgttaggtgcaattgtcggagcaacaattgtatggttaatgtacttgccacattggaaagcgacagaagaagctggcgcgaaattaggtgttttctctacagcaccggctattaagaattactttgccaactttttaagtgaaattatcggaacaatggcattaactttaggtattttatttatcggtgtaaacaaaattgctgatggtttaaatcctttaattgtcggagcattaattgttgcaatcggattaagtttaggcggtgctactggttatgcaatcaacccagcacgtcgaatatttgaagatccaagtacatcatataagtattctatttcaatgacaacacgtcaaatgcgtgaaggtgaagttgatggcgtagattacttttttaaaactagggatgcgtttgaagctttaattaaagatgaccaatttatagaatatgctgaatatgtaggcaactattatggtacaccagttcaatatgttaaagatacaatggacgaaggtcatgatgtatttttagaaattgaagtagaaggtgcaaagcaagttagaaagaaatttccagatgcgttatttattttcttagcacctccaagtttagatcacttgagagagcgattagtaggtagaggaacagaatctgatgagaaaatacaaagtcgtattaacgaagcacgtaaagaagtcgaaatgatgaatttatacgattacgttgcaacacaattacaagcaacagattatgttacaccaatcgtgttaggtgatgagactaaggttcaatctttagcgcaaaaacttgatcttgatatttctaatattgaattaattaatcctgcgacaagtgaattgaaagctgaattagttcaatcatttgttgaacgacgtaaaggtaaagcgactgaagaacaagcacaagaattattaaacaatgtgaactacttcggtacaatgcttgtttatgctggtaaagcagatggtttagttagtggtgcagcacattcaacaggcgacactgtgcgtccagctttacaaatcatcaaaacgaaaccaggtgtatcaagaacatcaggtatcttctttatgattaaaggtgatgaacaatacatctttggtgattgtgcaatcaatccagaacttgattcacaaggacttgcagaaattgcagtagaaagtgcaaaatcagcattacacgaaacagatgaagaaattaacaaaaaagcgcacgctattttcaaacatggaatgactccaattatatgtgttggtgaaacagacgaagagcgtgaaagtggtaaagctaacgatgttgtaggtgagcaagttaagaaagctgttgcaggtttatctgaagatcaacttaaatcagttgtaattgcttatgaaccaatctgggcaatcggaactggtaaatcatcaacatctgaagatgcaaatgaaatgtgtgcatttgtacgtcaaactattgctgacttatcaagcaaagaagtatcagaagcaactcgtattcaatatggtggtagtgttaaacctaacaacattaaagaatacatggcacaaactgatattgatggggcattagtaggtggcgcagcgtttaaagacgtgccagcctatgatttaggtgcgactttaatagaacatattattaaagagacgggtttgaatccaagtgagattgatgaagttatcatcggtaacgtactacaagcaggacaaggacaaaatccagcacgaattgctgctatgaaaggtggcttgccagaaacagtacctgcatttacggtgaataaagtatgtggttctgggttaaagtcgattcaattagcatatcaatctattgtgactggtgaaaatgacatcgtgctagctggcggtatggagaatatgtctcaatcaccaatgcttgtcaacaacagtcgctttggttttaaaatgggacatcaatcaatggttgatagcatggtatatgatggtttaacagatgtatttaatcaatatcatatgggtattactgctgaaaatttagtagagcaatatggtatttcaagagaagaacaagatacatttgctgtaaactcacaacaaaaagcagtacgtgcacagcaa
ttattaatccaacaagctaaatcgaacagtgacacaacgccggcaatgccattggatacttgtggtgcaatgtcacagggtatgataggctattggttggaaactgaaatcaatcgcattttaactgaaatgaatagtgatagaaccgtaggcacaatcgttacacgtgtggaagtagataaagatgatccaagatttgataacccaactaaaccaattggtcctttttatacgaaagaagaagttgaagaattacaaaaagaacagccagactcagtctttaaagaagatgcaggacgtggttatagaaaagtagttgcgtcaccactacctcaatctatactagaacaccagttaattcgaactttagcagacggtaaaaatattgtcattgcatgcggtggtggcggtattccagttataaaaaaagaaaatacctatgaaggtgttgaagcgaattttaattctttaggattagatgatacttatgaagctttaaatattccaattgaagattttcatttaattaaagaaattatttcgaaaaaagaattagatggctttaatatcacaattcctcataaagaacgtatcataccgtatttagatcatgttgatgaacaagcgattaatgcaggtgcagttaacactgttttgataaaagatgacaagtggatagggtataatacagatggtattggttatgttaaaggattgcacagcgtttatccagatttagaaaatgcatacattttaattttgggcgcaggtggtgcaagtaaaggtattgcttatgaattagcaaaatttgtaaagcccaaattaactgttgcgaatagaacgatggctcgttttgaatcttggaatttaaatataaaccaaatttcattagcagatgctgaaaagtatttaggtgctgattggattgtcatcacagctggatggggattagcggttacaatgggtgtgtttgctgtcggtcaattctcaggtgcacatttaaacccagcggtgtctttagctcttgcattagacggaagttttgattggtcattagttcctggttatattgttgctcaaatgttaggtgcaattgtcggagcaacaattgtatggttaatgtacttgccacattggaaagcgacagaagaagctggcgcgaaattaggtgttttctctacagcaccggctattaagaattactttgccaactttttaagtgagattatcggaacaatggcattaactttaggtattttatttatcggtgtaaacaaaattgccgatggtttaaatcctttaattgtcggagcattaattgttgcaatcggattaagtttaggcggtgctactggttatgcaatcaacccagcacgtcgaatatttgaagatccaagtacatcatataagtattctatttcaatgacaacacgtcaaatgcgtgaaggtgaagttgatggcgtagattacttttttaaaactagggatgcgtttgaagctttaatcaaagatgaccaatttatagaatatgctgaatatgtaggcaactattatggtacaccagttcaatatgttaaagatacaatggacgaaggtcatgatgtatttttagaaattgaagtagaaggtgcaaagcaagttagaaagaaatttccagatgcgttatttattttcttagcacctccaagtttagatcacttgagagagcgattagtaggtagaggaacagaatccaatgagaaaatacaaagtcgtattaacgaagcgcgtaaagaagttgaaatgatgaatttatacgattacgttgcaacacaattacaagcaacagattatgttacaccaatcgtgttaggtgatgagactaaggttcaatctttagcgcaaaaacttaatcttgatatttctaatattgaattaattaatcctgcgacaagtgaattgaaagctgaattagtccaatcatttgttgaacgacgtaaaggtaaagcgactgaagaacaagcgcaagaattattaaacaatatgaactacttcggtacaatgcttgtttatgctggtaaagcagatggtttagttagtggtgcagcacattcaacaggcgacactgtgcgtccagctttacaaatcatcaaaacgaaaccaggtgtatcaagaacatcaggtatcttctttatgattaaaggtgatgaacaatacatctttggtgattgtgcaatcaatccagaacttgattcacaaggacttgcagaaattgcagtagaaagtgcaaaatcagcattacacgaaacagatgaagaaattaacaaaaaagcgcacgctattttcaaacatggaatgactccaattatttgtgttggtgaaacagacgaagagcgtgaaagtggtaaagctaacgatgttgtaggtgagcaagttaagaaagctgttgcaggtttatctgaagatcaacttaaatcagttgtaattgcttatgagccaatctgggcaatcggaactggtaaatcatcaacatctgaagatgcaaatgaaatgtgtgcatttgtacgtcaaactattgctgacttatcaagcaaagaagtatcagaagcaactcgtattcaatatggtggtagtgttaaacctaacaacattaaagaatacatggcacaaactgatattgatggggcattagtaggtggcgcagcgtttaaagacgtgccagcctatgatttaggtgcgactttaatagaacatattattaaagagacgggtttgaatccaagtgagattgatgaagttatcatcggtaacgtactacaagcaggacaaggacaaaatccagcacgaattgctgctatgaaaggtggcttgccagaaacagtacctgcatttacagtgaataaagtatgtggttctgggttaaagtcgattcaattagcatatcaatctattgtgactggtgaaaatgacatcgtgctagctggcggtatggagaatatgtctcagtcaccaatgcttgtcaacaacagtcgcttcggttttaaaatgggacatcaatcaatggttgatagcatggtatatgatggtttaacagatgtatttaatcaatatcatatgggtattactgctgaaaatttagtagagcaatatggtatttcaagagaagaacaagatacatttgctgtaaactcacaacaaaaagcagtacgtgcacagcaa
ttattaatccaacaagctaaatcgaacagtgacacaacgccggcaatgccattggatacttgtggtgcaatgtcacagggtatgataggctattggttggaaactgaaatcaatcgcattttaactgaaatgaatagtgatagaaccgtaggcacaatcgttacacgtgtggaagtagataaagatgatccaagatttgataacccaactaaaccaattggtcctttttatacgaaagaagaagttgaagaattacaaaaagaacagccagactcagtctttaaagaagatgcaggacgtggttatagaaaagtagttgcgtcaccactacctcaatctatactagaacaccagttaattcgaactttagcagacggtaaaaatattgtcattgcatgcggtggtggcggtattccagttataaaaaaagaaaatacctatgaaggtgttgaagcgaattttaattctttaggattagatgatacttatgaagctttaaatattccaattgaagattttcatttaattaaagaaattatttcgaaaaaagaattagatggctttaatatcacaattcctcataaagaacgtatcataccgtatttagattatgttgatgaacaagcgattaatgcaggtgcagttaacactgttttgataaaagatggcaagtggatagggtataatacagatggtattggttatgttaaaggattgcacagcgtttatccagatttagaaaatgcatacattttaattttgggcgcaggtggtgcaagtaaaggtattgcttatgaattagcaaaatttgtaaagcccaaattaactgttgcgaatagaacgatggctcgttttgaatcttggaatttaaatataaaccaaatttcattggcagatgctgaaaagtatttaggtgctgattggattgtcatcacagctggatggggattagcggttacaatgggtgtgtttgctgtcggtcaattctcaggtgcacatttaaacccagcggtgtctttagctcttgcattagacggaagttttgattggtcattagttcctggttatattgttgctcaaatgttaggtgcaattgtcggagcaacaattgtatggttaatgtacttgccacattggaaagcgacagaagaagctggcgcgaaattaggtgttttctctacagcaccggctattaagaattactttgccaactttttaagtgagattatcggaacaatggcattaactttaggtattttatttatcggtgtaaacaaaattgccgatggtttaaatcctttaattgtcggagcattaattgttgcaatcggattaagtttaggcggtgctactggttatgcaatcaacccagcacgtcgaatatttgaagatccaagtacatcatataagtattctatttcaatgacaacacgtcaaatgcgtgaaggtgaagttgatggcgtagattacttttttaaaactagggatgcgtttgaagctttaattaaagatgaccaatttatagaatatgctgaatatgtaggcaactattatggtacaccagttcaatatgttaaagatacaatggacgaaggtcatgatgtatttttagaaattgaagtagaaggtgcaaagcaagttagaaagaaatttccagatgcgttatttattttcttagcacctccaagtttagatcacttgagagagcgattagtaggtagaggaacagaatccaatgagaaaatacaaagtcgtattaacgaagcgcgtaaagaagttgaaatgatgaatttatacgattacgttgcaacacaattacaagcaacagattatgttacaccaatcgtgttaggtgatgagactaaggttcaatctttagcgcaaaaacttgatcttgatatttctaatattgaattaattaatcctgcgacaagtgaattgaaagctgaattagttcaatcatttgttgaacgacgtaaaggtaaagcgactgaagaacaagcacaagaattattaaacaatgtgaactacttcggtacaatgcttgtttatgctggtaaagcagatggtttagttagtggtgcagcacattcaacaggagacactgtgcgtccagctttacaaatcatcaaaacgaaaccaggtgtatcaagaacatcaggtatcttctttatgattaaaggtgatgaacaatacatctttggtgattgtgcaatcaatccagaacttgattcacaaggacttgcagaaattgcagtagaaagtgcaaaatcagcattacacgaaacagatgaagaaattaacaaaaaagcgcacgctattttcaaacatggaatgactccaattatttgtgttggtgaaacagacgaagagcgtgaaagtggtaaagctaacgatgttgtaggtgagcaagttaagaaagctgttgcaggtttatctgaagatcaacttaaatcagttgtaattgcttatgagccaatctgggcaatcggaactggtaaatcatcaacatctgaagatgcaaatgaaatgtgtgcatttgtacgtcaaactattgctgacttatcaagcaaagaagtatcagaagcaactcgtattcaatatggtggtagtgttaaacctaacaacattaaagaatacatggcacaaactgatattgatggggcattagtaggtggcgcagcgtttaaagacgtgccagcctatgatttaggtgcgactttaatagaacatattattaaagagacgggtttgaatccaagtgagattgatgaagttatcatcggtaacgtactacaagcaggacaaggacaaaatccagcacgaattgctgctatgaaaggtggcttgccagaaacagtacctgcatttacggtgaataaagtatgtggttctgggttaaagtcgattcaattagcatatcaatctattgtgactggtgaaaatgacatcgtgctagctggcggtatggagaatatgtctcaatcaccaatgcttgtcaacaacagtcgctttggttttaaaatgggacatcaatcaatggttgatagcatggtatatgatggtttaacagatgtatttaatcaatatcatatgggtattactgctgaaaatttagtagagcaatatggtatttcaagagaagaacaagatacatttgctgtaaactcacaacaaaaagcagtacgtgcacagcaa
ttattaatccaacaagctaaatcgaacagtgacacaacgccggcaatgccattggatacttgtggtgcaatgtcacagggtatgataggctattggttggaaactgaaatcaatcgcattttaactgaaatgaatagtgatagaaccgtaggcacaatcgttacacgtgtggaagtagataaagatgatccacgattcaataacccaaccaaaccaattggtcctttttatacgaaagaagaagttgaagaattacaaaaagaacagccagactcagtctttaaagaagatgcaggacgtggttatagaaaagtagttgcgtcaccactacctcaatctatactagaacaccagttaattcgaactttagcagacggaaaaaatattgtcattgcatgcggtggtggcggtattccagttataaaaaaagaaaatacctatgaaggtgttgaagcgaattttaattctttaggattagatgatacttatgaagctttaaatattccaattgaagattttcatttaattaaagaaattatttcgaaaaaagaattagatggctttaatatcacaattcctcataaagaacgtatcataccgtatttagattatgttgatgaacaagcgattaatgcaggtgcagttaacactgttttgataaaagatggcaagtggatagggtataatacagatggtattggttatgttaaaggattgcacagcgtttatccagatttagaaaatgcatacattttaattttgggcgcaggtggtgcaagtaaaggtattgcttatgaattagcaaaatttgtaaagcccaaattaactgttgcgaatagaacgatggctcgttttgaatcttggaatttaaatataaaccaaatttcaatagcagatgctgaaaagtatttaggtgctgattggattgtcatcacagctggatggggattagcggttacaatgggtgtgtttgctgtcggtcaattctcaggtgcacatttaaacccagcggtgtctttagctcttgcattagacggaagttttgattggtcattagttcctggttatattgttgctcaaatgttaggtgcaattgtcggagcaacaattgtatggttaatgtacttgccacattggaaagcgacagaagaagctggcgcgaaattaggtgttttctctacagcaccggctattaagaattactttgccaactttttaagtgagattatcggaacaatggcattaactttaggtattttatttatcggtgtaaacaaaattgccgatggtttaaatcctttaattgtcggagcattaattgttgcaatcggattaagtttaggcggtgctactggttatgcaatcaacccagcacgtcgaatatttgaagatccaagtacatcgtataagtattctatttcaatgacaacacgtcaaatgcgtgaaggtgaagttgatggcgtagattacttttttaaaactagggatgcgtttgaagctttaattaaagatgaccaatttatagaatatgctgaatatgtaggcaactattatggtacaccagttcaatatgttaaagatacaatggacgaaggtcatgatgtatttttagaaattgaagtagaaggtgcaaagcaagttagaaagaaatttccagatgcgttatttattttcttagcacctccaagtttagatcacttgagagagcgattagtaggtagaggaacagaatccaatgagaaaatacaaagtcgtattaacgaagcgcgtaaagaagttgaaatgatgaatttatacgattacgttgcaacacaattacaagcaacagattatgttacaccaatcgtgttaggtgatgagactaaggttcaatctttagcgcaaaaacttgatcttgatatttctaatattgaattaattaatcctgcgacaagtgaattgaaagctgaattagttcaatcatttgttgaacgacgtaaaggtaaagcgactgaagaacaagcacaagaattattaaacaatgtgaactacttcggtacaatgcttgtttatgctggtaaagcagatggtttagttagtggtgcagcacattcaacaggagacactgtgcgtccagctttacaaatcatcaaaacgaaaccaggtgtatcaagaacatcaggtatcttctttatgattaaaggtgatgtacaatacatctttggtgattgtgcaatcaatccagaacttgattcacaaggacttgcagaaattgcagtagaaagtgcaaaatcagcattacacgaaacagatgaagaaattaacaaaaaagcgcacgctattttcaaacatggaatgactccaattatatgtgttggtgaaacagacgaagagcgtgaaagtggtaaagctaacgatgttgtaggtgagcaagttaagaaagctgttgcaggtttatctgaagatcaactaaaatcagttgtaattgcttatgaaccaatctgggcaatcggaactggtaaatcatcaacatctgaagatgcaaatgaaatgtgtgcatttgtacgtcaaactattgctgacttatcaagcaaagaagtatcagaagcaactcgtattcaatatggtggtagtgttaaacctaacaacattaaagaatacatggcacaaactgatattgatggggcattagtaggtggcgcagcgtttaaagacgtgccagcctatgatttaggtgcgactttaatagaacatattattaaagagacgggtttgaatccaagtgagattgatgaagttatcatcggtaacgtactacaagcaggacaaggacaaaatccagcacgaattgctgctatgaaaggtggcttgccagaaacagtacctgcatttacggtgaataaagtatgtggttctgggttaaagtcgattcaattagcatatcaatctattgtgactggtgaaaatgacatcgtgctagctggcggtatggagaatatgtctcaatcaccaatgcttgtcaacaacagtcgctttggttttaaaatgggacatcaatcaatggttgatagcatggtatatgatggtttaacagatgtatttaatcaatatcatatgggtattactgctgaaaatttagtagagcaatatggtatttcaagagaagaacaagatacatttgctgtaaactcacaacataaagcattacgtgcacagcaa
ttattaatccaacaagctaaatcgaacagtgacacaacgccggcaatgccattggatacttgtggtgcaatgtcacagggtatgataggctattggttggaaactgaaatcaatcgcattttaactgaaatgaatagtgatagaaccgtaggcacaatcgttacacgtgtggaagtagataaagatgatccacgattcaataacccaaccaaaccaattggtcctttttatacgaaagaagaagttgaagaattacaaaaagaacagccagactcagtctttaaagaagatgcaggacgtggttatagaaaagtagttgcgtcaccactacctcaatctatactagaacaccagttaattcgaactttagcagacggaaaaaatattgtcattgcatgcggtggtggcggtattccagttataaaaaaagaaaatacctatgaaggtgttgaagcgaattttaattctttaggattagatgatacttatgaagctttaaatattccaattgaagattttcatttaattaaagaaattatttcgaaaaaagaattagaaggctttaatatcacaattcctcataaagaacgtatcataccgtatttagattatgttgatgaacaagcgattaatgcaggtgcagttaacactgttttgataaaagatggcaagtggatagggtataatacagatggtattggttatgttaaaggattgcacagcgtttatccagatttagaaaatgcatacattttaattttgggcgcaggtggtgcaagtaaaggtattgcttatgaattagcaaaatttgtaaagcccaaattaactgttgcgaatagaacgatggctcgttttgaatcttggaatttaaatataaaccaaatttcattagcagatgctgaaaagtatttaggtgctgattggattgtcatcacagctggatggggattagcggttacaatgggtgtgtttgctgtcggtcaattctcaggtgcacatttaaacccagcggtgtctttagctcttgcattagacggaagttttgattggtcattagttcctggttatattgttgctcaaatgttaggtgcaattgtcggagcaacaattgtatggttaatgtacttgccacattggaaagcgacagaagaagctggcgcgaaattaggtgttttctctacagcaccggctattaagaattactttgccaactttttaagtgagattatcggaacaatggcattaactttaggtattttatttatcggtgtaaacaaaattgccgatggtttaaatcctttaattgtcggagcattaattgttgcaatcggattaagtttaggcggtgctactggttatgcaatcaacccagcacgtcgaatatttgaagatccaagtacatcatataagtattctatttcaatgacaacacgtcaaatgcgtgaaggtgaagttgatggcgtagattacttttttaaaactagggatgcgtttgaagctttaatcaaagatgaccaatttatagaatatgctgaatatgtaggcaactattatggtacaccagttcaatatgttaaagatacaatggacgaaggtcatgatgtatttttagaaattgaagtagaaggtgcaaagcaagttagaaagaaatttccagatgcgctatttattttcttagcacctccaagtttagaacacttgagagagcgattagtaggtagaggaacagaatctgatgagaaaatacaaagtcgtattaacgaagcgcgtaaagaagttgaaatgatgaatttatacgattacgttgcaacacaattacaagcaacagattatgttacaccaatcgtgttaggtgatgagactaaggttcaatctttagcgcaaaaacttaatcttgatatttctaatattgaattaattaatcctgcgacaagtgaattgaaagctgaattagtccaatcatttgttgaacgacgtaaaggtaaagcgactgaagaacaagcgcaagaattattaaacaatgtgaactacttcggtacaatgcttgtttatgctggtaaagcagatggtttagttagtggtgcagcacattcaacaggcgacactgtgcgtccagctttacaaatcatcaaaacgaaaccaggtgtatcaagaacatcaggtatcttctttatgattaaaggtgatgaacaatacatctttggtgattgtgcaatcaatccagaacttgattcacaaggacttgcagaaattgcagtagaaagtgcaaaatcagcattacacgaaacagatgaagaaattaacaaaaaagcgcacgctattttcaaacatggaatgactccaattatatgtgttggtgaaacagacgaagagcgtgaaagtggtaaagctaacgatgttgtaggtgagcaagttaagagagctgttgcaggtttatctgaagatcaacttaaatcagttgtaattgcttatgaaccaatctgggcaatcggaactggtaaatcatcaacatctgaagatgcaaatgaaatgtgtgcatttgtacgtcaaactattgctgacttatcaagcaaagaagtatcagaagcaactcgtattcaatatggtggtagtgttaaacctaacaacattaaagaatacatggcacaaactgatattgatggggcattagtaggtggcgcagcgtttaaagacgtgccagcctatgatttaggtgcgactttaatagaacatattattaaagagacgggtttgaatccaagtgagattgatgaagttatcatcggtaacgtactacaagcaggacaaggacaaaatccagcacgaattgctgctatgaaaggtggcttaccagaaacagtacctgcatttacagtgaataaagtatgtggttctgggttaaagtcgattcaattagcatatcaatctattgtgactggtgaaaatgacatcgtgctagctggcggtatggagaatatgtctcaatcaccaatgcttgtcaacaacagtcgctttggttttaaaatgggacatcaatcaatggttgatagcatggtatatgatggtttaacagatgtatttaatcaatatcatatgggtattactgctgaaaatttagtagagcaatatggtatttcaagagaagaacaagatacatttgctgtaaactcacaacaaaaagcagtacgtgcacagcaa
ttattaatccaacaagctaaatcgaacagtgacacaacgccggcaatgccattggatacttgtggtgcaatgtcacagggtatgataggctattggttggaaactgaaatcaatcgcattttaactgaaatgaatagtgatagaaccgtaggcacaatcgttacacgtgtggaagtagataaagatgatccacgattcaataacccaaccaaaccaattggtcctttttatacgaaagaagaagttgaagaattacaaaaagaacagccagactcagtctttaaagaagatgcaggacgtggttatagaaaagtagttgcgtcaccactacctcaatctatactagaacaccagttaattcgaactttagcagacggaaaaaatattgtcattgcatgcggtggtggcggtattccagttataaaaaaagaaaatacctatgaaggtgttgaagcgaattttaattctttaggattagatgatacttatgaagctttaaatattccaattgaagattttcatttaattaaagaaattatttcgaaaaaagaattagaaggctttaatatcacaattcctcataaagaacgtatcataccgtatttagattatgttgatgaacaagcgattaatgcaggtgcagttaacactgttttgataaaagatggcaagtggatagggtataatacagatggtattggttatgttaaaggattgcacagcgtttatccagatttagaaaatgcatacattttaattttgggcgcaggtggtgcaagtaaaggtattgcttatgaattagcaaaatttgtaaagcccaaattaactgttgcgaatagaacgatggctcgttttgaatcttggaatttaaatataaaccaaatttcattagcagatgctgaaaagtatttaggtgctgattggattgtcatcacagctggatggggattagcggttacaatgggtgtgtttgctgtcggtcaattctcaggtgcacatttaaacccagcggtgtctttagctcttgcattagacggaagttttgattggtcattagttcctggttatattgttgctcaaatgttaggtgcaattgtcggagcaacaattgtatggttaatgtacttgccacattggaaagcgacagaagaagctggcgcgaaattaggtgttttctctacagcaccggctattaagaattactttgccaactttttaagtgagattatcggaacaatggcattaactttaggtattttatttatcggtgtaaacaaaattgccgatggtttaaatcctttaattgtcggagcattaattgttgcaatcggattaagtttaggcggtgctactggttatgcaatcaacccagcacgtcgaatatttgaagatccaagtacatcatataagtattctatttcaatgacaacacgtcaaatgcgtgaaggtgaagttgatggcgtagattacttttttaaaactagggatgcgtttgaagctttaatcaaagatgaccaatttatagaatatgctgaatatgtaggcaactattatggtacaccagttcaatatgttaaagatacaatggacgaaggtcatgatgtatttttagaaattgaagtagaaggtgcaaagcaagttagaaagaaatttccagatgcgctatttattttcttagcacctccaagtttagaacacttgagagagcgattagtaggtagaggaacagaatctgatgagaaaatacaaagtcgtattaacgaagcgcgtaaagaagttgaaatgatgaatttatacgattacgttgcaacacaattacaagcaacagattatgttacaccaatcgtgttaggtgatgagactaaggttcaatctttagcgcaaaaacttaatcttgatatttctaatattgaattaattaatcctgcgacaagtgaattgaaagctgaattagtccaatcatttgttgaacgacgtaaaggtaaagcgactgaagaacaagcgcaagaattattaaacaatgtgaactacttcggtacaatgcttgtttatgctggtaaagcagatggtttagttagtggtgcagcacattcaacaggcgacactgtgcgtccagctttacaaatcatcaaaacgaaaccaggtgtatcaagaacatcaggtatcttctttatgattaaaggtgatgaacaatacatctttggtgattgtgcaatcaatccagaacttgattcacaaggacttgcagaaattgcagtagaaagtgcaaaatcagcattacacgaaacagatgaagaaattaacaaaaaagcgcacgctattttcaaacatggaatgactccaattatatgtgttggtgaaacagacgaagagcgtgaaagtggtaaagctaacgatgttgtaggtgagcaagttaagagagctgttgcaggtttatctgaagatcaacttaaatcagttgtaattgcttatgaaccaatctgggcaatcggaactggtaaatcatcaacatctgaagatgcaaatgaaatgtgtgcatttgtacgtcaaactattgctgacttatcaagcaaagaagtatcagaagcaactcgtattcaatatggtggtagtgttaaacctaacaacattaaagaatacatggcacaaactgatattgatggggcattagtaggtggcgcagcgtttaaagacgtgccagcctatgatttaggtgcgactttaatagaacatattattaaagagacgggtttgaatccaagtgagattgatgaagttatcatcggtaacgtactacaagcaggacaaggacaaaatccagcacgaattgctgctatgaaaggtggcttgccagaaacagtacctgcatttacagtgaataaagtatgtggttctgggttaaagtcgattcaattagcatatcaatctattgtgactggtgaaaatgacatcgtgctagctggcggtatggagaatatgtctcaatcaccaatgcttgtcaacaacagtcgctttggttttaaaatgggacatcaatcaatggttgatagcatggtatatgatggtttaacagatgtatttaatcaatatcatatgggtattactgctgaaaatttagtagagcaatatggtatttcaagagaagaacaagatacatttgctgtaaactcacaacaaaaagcagtacgtgcacagcaa
ttattaatccaacaagctaaatcgaacagtgacacaacgccggcaatgccattggatacttgtggtgcaatgtcacagggtatgataggctattggttggaaactgaaatcaatcgcattttaactgaaatgaatagtgatagaactgtaggcacaatcgtaacacgtgtggaagtagataaagatgatccacgattcaataacccaaccaaaccaattggtcctttttatacgaaagaagaagttgaagaattacaaaaagaacagccagactcagtctttaaagaagatgcaggacgtggttatagaaaagtagttgcgtcaccactacctcaatctatactagaacaccagttaattcgaactttagcagacggtaaaaatattgtcattgcatgcggtggtggcggtattccagttataaaaaaagaaaatacctatgaaggtgttgaagcgaattttaattctttaggattagatgatacttatgaagctttaaatattccaattgaagattttcatttaattaaagaaattatttcgaaaaaagaattagatggctttaatatcacaattcctcataaagaacgtatcataccgtatttagattatgttgatgaacaagcgattaatgcaggtgcagttaacactgttttgataaaagatggcaagtggatagggtataatacagatggtattggttatgttaaaggattgcacagcgtttatccagatttagaaaatgcatacattttaattttgggcgcaggtggtgcaagtaaaggtattgcttatgaattagcaaaatttgtaaagcccaaattaactgttgcgaatagaacgatggctcgttttgaatcttggaatttaaatataaaccaaatttcattggcagatgctgaaaagtatttaggtgctgattggattgtcatcacagctggatggggattagcggttacaatgggtgtgtttgctgtcggtcaattctcaggtgcacatttaaacccagcggtgtctttagctcttgcattagacggaagttttgattggtcattagttcctggttatattgttgctcaaatgttaggtgcaattgtcggagcaacaattgtatggttaatgtacttgccacattggaaagcgacagaagaagctggcgcgaaattaggtgttttctctacagcaccggctattaagaattactttgccaactttttaagtgagattatcggaacaatggcattaactttaggtattttatttatcggtgtaaacaaaattgccgatggtttaaatcctttaattgtcggagcattaattgttgcaatcggattaagtttaggcggtgctactggttatgcaatcaacccagcacgtcgaatatttgaagatccaagtacatcatataagtattctatttcaatgacaacacgtcaaatgcgtgaaggtgaagttgatggcgtagattacttttttaaaactagggatgcgtttgaagctttaattaaagatgaccaatttatagaatatgctgaatatgtaggcaactattatggtacaccagttcaatatgttaaagatacaatggacgaaggtcatgatgtatttttagaaattgaagtagaaggtgcaaagcaagttagaaagaaatttccagatgcgttatttattttcttagcacctccaagtttagatcacttgagagagcgattagtaggtagaggaacagaatccaatgagaaaatacaaagtcgtattaacgaagcgcgtaaagaagttgaaatgatgaatttatacgattacgttgcaacacaattacaagcaacagattatgttacaccaatcgtgttaggtgatgagactaaggttcaatctttagcgcaaaaacttgatcttgatatttctaatattgaattaattaatcctgcgacaagtgaattgaaagctgaattagttcaatcatttgttgaacgacgtaaaggtaaagcgactgaagaacaagcacaagaattattaaacaatgtgaactacttcggtacaatgcttgtttatgctggtaaagcagatggtttagttagtggtgcagcacattcaacaggcgacactgtgcgtccagctttacaaatcatcaaaacgaaaccaggtgtatcaagaacatcaggtatcttctttatgattaaaggtgatgaacaatacatctttggtgattgtgcaatcaatccagaacttgattcacaaggacttgcagaaattgcagtagaaagtgcaaaatcagcattacacgaaacagatgaagaaattaacaaaaaagcgcacgctattttcaaacatggaatgactccaattatatgtgttggtgaaacagacgaagagcgtgaaagtggtaaagctaacgatgttgtaggtgagcaagttaagaaagctgttgcaggtttatctgtagatcaacttaaatcagttgtaattgcttatgaaccaatctgggcaatcggaactggtaaatcatcaacatctgaagatgcaaatgaaatgtgtgcatttgtacgtcaaactattgctgacttatcaagcaaagaagtatcagaagcaactcgtattcaatatggtggtagtgttaaacctaacaacattaaagaatacatggcacaaactgatattgatggggcattagtaggtggcgcagcgtttaaagacgtgccagcctatgatttaggtgcgactttaatagaacatattattaaagagacgggtttgaatccaagtgagattgatgaagttatcatcggtaacgtactacaagcaggacaaggacaaaatccagcacgaattgctgctatgaaaggtggcttgccagaaacagtacctgcatttacggtgaataaagtatgtggttctgggttaaagtcgattcaattagcatatcaatctattgtgactggtgaaaatgacatcgtgctagctggcggtatggagaatatgtctcaatcaccaatgcttgtcaacaacagtcgctttggttttaaaatgggacatcaatcaatggttgatagcatggtatatgatggtttaacagatgtatttaatcaatatcatatgggtattactgctgaaaatttagtagagcaatatggtatttcaagagaagaacaagatacatttgctgtaaactcacaacaaaaagcagtacgtgcacagcaa
ttattaatccaacaagctaaatcgaacagtgacacaacgccggcaatgccattggatacttgtggtgcaatgtcacagggtatgataggctattggttggaaactgaaatcaatcgcattttaactgaaatgaatagtgatagaactgtaggcacaatcgtaacacgtgtggaagtagataaagatgatccacgattcaataacccaaccaaaccaattggtcctttttatacgaaagaagaagttgaagaattacaaaaagaacagccagactcagtctttaaagaagatgcaggacgtggttatagaaaagtagttgcgtcaccactacctcaatctatactagaacaccagttaattcgaactttagcagacggtaaaaatattgtcattgcatgcggtggtggcggtattccagttataaaaaaagaaaatacctatgaaggtgttgaagcgaattttaattctttaggattagatgatacttatgaagctttaaatattccaattgaagattttcatttaattaaagaaattatttcgaaaaaagaattagatggctttaatatcacaattcctcataaagaacgtatcataccgtatttagatcatgttgatgaacaagcgattaatgcaggtgcagttaacactgttttgataaaagatgacaagtggatagggtataatacagatggtattggttatgttaaaggattgcacagcgtttatccagatttagaaaatgcatacattttaattttgggcgcaggtggtgcaagtaaaggtattgcttatgaattagcaaaatttgtaaagcccaaattaactgttgcgaatagaacgatggctcgttttgaatcttggaatttaaatataaaccaaatttcattagcagatgctgaaaagtatttaggtgctgattggattgtcatcacagctggatggggattagcggttacaatgggtgtgtttgctgtcggtcaattctcaggtgcacatttaaacccagcggtgtctttagctcttgcattagacggaagttttgattggtcattagttcctggttatattgttgctcaaatgttaggtgcaattgtcggagcaacaattgtatggttaatgtacttgccacattggaaagcgacagaagaagctggcgcgaaattaggtgttttctctacagcaccggctattaagaattactttgccaactttttaagtgagattatcggaacaatggcattaactttaggtattttatttatcggtgtaaacaaaattgccgatggtttaaatcctttaattgtcggagcattaattgttgcaatcggattaagtttaggcggtgctactggttatgcaatcaacccagcacgtcgaatatttgaagatccaagtacatcgtataagtattctatttcaatgacaacacgtcaaatgcgtgaaggtgaagttgatggcgtagattacttttttaaaactagggatgcgtttgaagctttaattaaagatgaccaatttatagaatatgctgaatatgtaggcaactattatggtacaccagttcaatatgttaaagatacaatggacgaaggtcatgatgtatttttagaaattgaagtagaaggtgcaaagcaagttagaaagaaatttccagatgcgttatttattttcttagcacctccaagtttagatcacttgagagagcgattagtaggtagaggaacagaatccaatgagaaaatacaaagtcgtattaacgaagcgcgtaaagaagttgaaatgatgaatttatacgattacgttgcaacacaattacaagcaacagattatgttacaccaatcgtgttaggtgatgagactaaggttcaatctttagcgcaaaaacttgatcttgatatttctaatattgaattaattaatcctgcgacaagtgaattgaaagctgaattagttcaatcatttgttgaacgacgtaaaggtaaagcgactgaagaacaagcacaagaattattaaacaatgtgaactacttcggtacaatgcttgtttatgctggtaaagcagatggtttagttagtggtgcagcacattcaacaggagacactgtgcgtccagctttacaaatcatcaaaacgaaaccaggtgtatcaagaacatcaggtatcttctttatgattaaaggtgatgtacaatacatctttggtgattgtgcaatcaatccagaacttgattcacaaggacttgcagaaattgcagtagaaagtgcaaaatcagcattacacgaaacagatgaagaaattaacaaaaaagcgcacgctattttcaaacatggaatgactccaattatttgtgttggtgaaacagacgaagagcgtgaaagtggtaaagctaacgatgttgtaggtgagcaagttaagaaagctgttgcaggtttatctgaagatcaacttaaatcagttgtaattgcttatgagccaatctgggcaatcggaactggtaaatcatcaacatctgaagatgcaaatgaaatgtgtgcatttgtacgtcaaactattgctgacttatcaagcaaagaagtatcagaagcaactcgtattcaatatggtggtagtgttaaacctaacaacattaaagaatacatggcacaaactgatattgatggggcattagtaggtggcgcagcgtttaaagacgtgccagcctatgatttaggtgcgactttaatagaacatattattaaagagacgggtttgaatccaagtgagattaatgaagtcatcatcggtaacgtactacaagcaggacaaggacaaaatccagcacgaattgctgctatgaaaggtggcttgccagaaacagtacctgcatttacagtgaataaagtatgtggttctgggttaaagtcgattcaattagcatatcaatctattgtgactggtgaaaatgacatcgtgctagctggcggtatggagaatatgtctcaatcaccaatgcttgtcaacaacagtcgctttggttttaaaatgggacatcaatcaatggttgatagcatggtatatgatggtttaacagatgtatttaatcaatatcatatgggtattactgctgaaaatttagtagagcaatatggtatttcaagagaagaacaagatacatttgctgtaaactcacaacaaaaagcagtacgtgcacagcaa
ttattaatccaacaagctaaatcgaacagtgacacaacgccggcaatgccattggatacttgtggtgcaatgtcacagggtatgataggctattggttggaaactgaaatcaatcgcattttaactgaaatgaatagtgatagaactgtaggcacaatcgtaacacgtgtggaagtagataaagatgatccacgattcaataacccaaccaaaccaattggtcctttttatacgaaagaagaagttgaagaattacaaaaagaacagccagactcagtctttaaagaagatgcaggacgtggttatagaaaagtagttgcgtcaccactacctcaatctatactagaataccagttaattcgaactttagcagacggtaaaaatattgtcattgcatgcggtggtggcggtattccagttataaaaaaagaaaatacctatgaaggtgttgaagcgaattttaattctttgggattagatgatacttatgaagctttaaatattccaattgaagattttcatttaattaaagaaattatttcaaaaaaagaattagatggctttaatatcacaattcctcataaagagcgtatcataccgtatttagatcaagttgatgaacaagcgattaatgcaggtgcagttaatactgttttgataaaagatggcaagtggatagggtataatacagatggtattggttatgtaaaaggattgcacagcgtttatccagatttagaaaatgcatacattttaattttgggagcaggtggtgcaagtaaaggtattgcttatgaattagcaaaatttgtaaagcccaaattaactgttgcgaatagaacgatggctcgttttgaatcttggaatttaaatataaaccaaatttcattggcagatgctgaaaagtatttaggtgctgattggattgtcatcacagctggatggggattagcggttacaatgggtgtatatgctgtcggtcaattctcaggtgcacatttaaacccagcggtgtctttagctcttgcattagacggaagttttgattggtcattagttcctggttatattgttgctcaaatgttaggtgcaattgtcggagcaacgattgtatggttaatgtacttgccacattggaaagcgacagaagaagctggcgcgaaattaggtgttttctctacagcaccggctattaagaattactttgccaactttttaagtgagattatcggaacaatggcattaactttaggtattttatttatcggtgtaaacaaaattgccgatggtttaaatcctttaattgtcggagcattaattgttgcaattggattaagtttaggcggtgctactggttatgcaatcaacccagcacgtcgaatatttgaagatccaagtacatcatataagtattctatttcaatgacaacgcgtcaaatgcgtgaaggtgaagttgatggcgtagattacttttttaaaactagggatgcgtttgaagctttaattaaagatgaccaatttatagaatatgctgaatatgtaggcaactattatggtacaccagttcaatatgttaaagatacaatggacgaaggtcatgatgtatttttagaaattgaagtagaaggtgcaaagcaagttagaaagaaatttccagatgcgttatttattttcttagcacctccaagtttagatcacttgagagagcgattagtaggtagaggaacagaatctgatgagaaaatacaaagtcgtattaacgaagcacgtaaagaagtcgaaatgatgaatttatacgattacgttgcaacacaattaaaagcaacagattatgttacaccaatcgtgttaggtgatgagactaaggttcaatctttagcgcaaaaacttaatcttgatatttctaatattgaattaattaatcctgcgacaagtgaattgaaagctgaattagttcaatcatttgttgaacgacgtaaaggtaaagcgactgaagaacaagcacaagaattattaaacaatgtgaactacttcggtacaatgcttgtttatgctggtaaagcagatggtttagttagtggtgcagcacattcaacaggcgacactgtgcgtccagcattacaaatcatcaaaacgaaaccaggtgtatcaagaacatcaggtatcttctttatgattaaaggtgatgaacaatacatctttggtgattgtgcaatcaatccagaacttgattcacaaggacttgcagaaattgcagtagaaagtgcaaaatcagcattacacgaaacagatgaagaaattaacaaaaaagcgcatgctattttcaaacatggtatgacaccaattatttgtgttggtgaaacagacgaagagcgtgaaagtggtaaagctaacgatgttgtaggtgagcaagttaagaaagctgttgcaggtttatctgaagatcaacttaaatcagttgtaattgcttatgaaccaatctgggcaatcggaactggtaaatcatcaacatctgaagatgcgaatgaaatgtgtgcatttgtacgtcaaactattgctgacttatcaagcaaagaagtatcagaagcaactcgtattcaatatggtggtagtgttaaacctaacaacattaaagaatacatggcacaaactgatattgatggggcattagtaggtggcgcagcgtttaaagacgtgccagcctatgatttaggtgcgactttaatagaacatattattaaagagacgggtttgaatccaagtgagattaatgaagtcatcatcggtaacgtactacaagcaggacaaggacaaaatccagcacgaattgctgctatgaaaggtggcttgccagaaacagtacctgcatttacagtgaataaagtatgtggttctgggttaaagtcgattcaattagcatatcaatctattgtgactggtgaaaatgacatcgtgctagctggcggtatggagaatatgtctcaatcaccaatgcttgtcaacaacagtcgctttggttttaaaatgggacatcaatcaatggttgatagcatggtatatgatggtttaacagatgtatttaatcaatatcatatgggtattactgctgaaaatttagtagagcaatatggtatttcaagagaagaacaagatacatttgctgtaaactcacaacaaaaagcagtacgtgcacagcaa
ttattaatccaacaagctaaatcgaacagtgacacaacgccggcaatgccattggatacttgtggtgcaatgtcacagggtatgataggctattggttggaaactgaaatcaatcgcattttaactgaaatgaatagtgatagaactgtaggcacaatcgtaacacgtgtggaagtagataaagatgatccacgattcaataacccaaccaaaccaattggtcctttttatacgaaagaagaagttgaagaattacaaaaagaacagccagactcagtctttaaagaagatgcaggacgtggttatagaaaagtagttgcgtcaccactacctcaatctatactagaacaccagttaattcgaactttagcagacggtaaaaatattgtcattgcatgcggtggtggcggtattccagttataaaaaaagaaaatacctatgaaggtgttgaagcgaattttaattctttgggattagatgatacttatgaagctttaaatattccaattgaagattttcatttaattaaagaaattatttcaaaaaaagaattagatggctttaatatcacaattcctcataaagagcgtatcataccgtatttagatcatgttgatgaacaagcgattaatgcaggtgcagttaatactgttttgataaaagatggcaagtggatagggtataatacagatggtattggttatgtaaaaggattgcacagcgtttatccagatttagaaaatgcatacattttaattttgggagcaggtggtgcaagtaaaggtattgcttatgaattagcaaaatttgtaaagcccaaattaactgttgcgaatagaacgatggctcgttttgaatcttggaatttaaatataaaccaaatttcattggcagatgctgaaaagtatttaggtgctgattggattgtcatcacagctggatggggattagcggttacaatgggtgtatatgctgtcggtcaattctcaggtgcacatttaaacccagcggtgtctttagctcttgcattagacggaagttttgattggtcattagttcctggttatattgttgctcaaatgttaggtgcaattgtcggagcaacgattgtatggttaatgtacttgccacattggaaagcgacagaagaagctggcgcgaaattaggtgttttctctacagcaccggctattaagaattactttgccaactttttaagtgagattatcggaacaatggcattaactttaggtattttatttatcggtgtaaacaaaattgccgatggtttaaatcctttaattgtcggagcattaattgttgcaattggattaagtttaggcggtgctactggttatgcaatcaacccagcacgtcgaatatttgaagatccaagtacatcatataagtattctatttcaatgacaacacgtcaaatgcgtgaaggtgaagttgatggcgtagattacttttttaaaactagggatgcgtttgaagctttaattaaagatgaccaatttatagaatatgctgaatatgtaggcaactattatggtacaccagttcaatatgttaaagatacaatggacgaaggtcatgatgtatttttagaaattgaagtagaaggtgcaaagcaagttagaaagaaatttccagatgcgttatttattttcttagcacctccaagtttagatcacttgagagagcgattagtaggtagaggaacagaatctgatgagaaaatacaaagtcgtattaacgaagcacgtaaagaagttgaaatgatgaatttatacgattacgttgcaacacaattacaagcaacagattatgttacaccaatcgtgttaggtgatgagactaaggttcaatctttagcgcaaaaacttaatcttgatatttctaatattgaattaattaatcctgcgacaagtgaattgaaagctgaattagttcaatcatttgttgaacgacgtaaaggtaaagcgactgaagaacaagcacaagaattattaaacaatgtgaactacttcggtacaatgcttgtttatgctggtaaagcagatggtttagttagtggtgcagcacattcaacaggcgacactgtgcgtccagcattacaaatcatcaaaacgaaaccaggtgtatcaagaacatcaggtatcttctttatgattaaaggtgatgaacaatacatctttggtgattgtgcaatcaatccagaacttgattcacaaggacttgcagaaattgcagtagaaagtgcaaaatcagcattacacgaaacagatgaagaaattaacaaaaaagcgcacgctattttcaaacatggaatgactccaattatttgtgttggtgaaacagacgaagagcgtgaaagtggtaaagctaacgatgttgtaggtgagcaagttaagaaagctgttgcaggtttatctgaagatcaacttaaatcagttgtaattgcttatgaaccaatctgggcaatcggaactggtaaatcatcaacatctgaagatgcgaatgaaatgtgtgcatttgtacgtcaaactattgctgacttatcaagcaaagaagtatcagaagcaactcgtattcaatatggtggtagtgttaaacctaacaacattaaagaatacatggcacaaactgatattgatggggcattagtaggtggcgcagcgtttaaagacgtgccagcctatgatttaggtgcgactttaatagaacatattattaaagagacgggtttgaatccaagtgagattaatgaagtcatcatcggtaacgtactacaagcaggacaaggacaaaatccagcacgaattgctgctatgaaaggtggcttgccagaaacagtacctgcatttacagtgaataaagtatgtggttctgggttaaagtcgattcaattagcatatcaatctattgtgactggtgaaaatgacatcgtgctagctggcggtatggagaatatgtctcaatcaccaatgcttgtcaacaacagtcgctttggttttaaaatgggacatcaatcaatggttgatagcatggtatatgatggtttaacagatgtatttaatcaatatcatatgggtattactgctgaaaatttagtagagcaatatggtatttcaagagaagaacaagatacatttgctgtaaactcacaacaaaaagcagtacgtgcacagcaa
ttattaatccaacaagctaaatcgaacagtgacacaacgccggcaatgccattggatacttgtggtgcaatgtcacagggtatgataggctattggttggaaactgaaatcaatcgcattttaactgaaatgaatagtgatagaactgtaggcacaatcgttacacgtgtggaagtagataaaaatgatccacgatttgataacccaactaaaccaattggtcctttttatacgaaagaagaagttgaagaattacaaaaagaacagccagactcagtctttaaagaagatgcaggacgtggttatagaaaagtagttgcgtcaccactacctcaatctatactagaacaccagttaattcgaactttagcagacggtaaaaatattgtcattgcatgcggtggtggcggtattccagttataaaaaaagaaaatacctatgaaggtgttgaagcgaattttaattctttaggattagatgatacttatgaagctttaaatattccaattgaagattttcatttaattaaagaaattatttcaaaaaaagaattagatggctttaatatcacaattcctcataaagagcgtatcataccgtatttagatcatgttgatgaacaagcgattaatgcaggtgcagttaacactgttttgataaaagatggcaagtggatagggtataatacagatggtattggttatgtaaagggattgcacagcgtttatccagatttagaaaatgcatacattttaattttgggcgcaggtggtgcaagtaaaggtattgcttatgaattagcaaaatttgtaaagcccaaattaactgttgcgaatagaacgatggctcgttttgaatcttggaatttaaatataaaccaaatttcattggaagatgctgaaaagtatttaggtgctgattggattgtcatcacagctggatggggattagcggttacaatgggtgtgtatgctgtcggtcaattctcaggtgcacatttaaacccagcggtgtctttagctcttgcattagacggaagttttgattggtcattagttcctggttatattgttgctcaaatgttaggtgcaattgtcggagcaacaattgtatggttaatgtacttgccacattggaaagcgacagaagaagctggcgcgaaattaggtgttttctctacagcaccggctattaagaattactttgccaactttttaagtgagattatcggaacaatggcattaactttaggtattttatttatcggtgtaaacaaaattgccgatggtttaaatcctttaattgtcggagcattaattgttgcaatcggattaagtttaggcggtgctactggttatgcaatcaacccagcacgtcgaatatttgaagatccaagtacatcatataagtattctatttcaatgacaacacgtcaaatgcgtgaaggtgaagttgatggcgtagattacttttttaaaactagggatgcgtttgaagctttaattaaagatgaccaatttatagaatatgctgaatatgtaggcaactattatggtacaccagttcaatatgttaaagatacaatggacgaaggtcatgatgtatttttagaaattgaagtagaaggtgcaaagcaagttagaaagaaatttccagatgcgttatttattttcttagcacctccaagtttagatcacttgagagagcgattagtaggtagaggaacagaatctgatgagaaaatacaaagtcgtattaacgaagcacgtaaagaagtcgaaatgatgaatttatacgattacgttgcaacacaattacaagcaacagattatgttacaccaatcgtgttaggtgatgagactaaggttcaatctttagcgcaaaaacttaatcttgatatttctaatattgaattaattaatcctgcgacaagtgaattgaaagctgaattagttcaatcatttgttgaacgacgtaaaggtaaagcgactgaagaacaagcacaagaattattaaacaatgtgaactacttcggtacaatgcttgtttatgctggtaaagcagatggtctagttagtggtgcagcacattcaacaggcgacactgtgcgtccagctttacaaatcatcaaaacgaaaccaggtgtatcaagaacatcaggtatcttctttatgattaaaggtgatgaacaatacatctttggtgattgtgcaatcaatccagaacttgattcacaaggacttgcagaaattgcagtagaaagtgcaaaatcagcattacacgaaacagatgaagaaattaacaaaaaagcgcatgctattttcaaacatggaatgactccaattatttgtgttggtgaaacagacgaagagcgtgaaagtggtaaagctaacgatgttgtaggtgagcaagttaagaaagctgttgcaggtttatctgaagatcaacttaaatcagttataattgcttatgaaccaatttgggcaatcggaactggtaaatcatcaacatctgaagatgcgaatgaaatgtgtgcatttgtacgtcaaactattgctgacttatcaagcaaagaagtatcagaagcaactcgtattcaatatggtggtagtgttaaacctaacaacattaaagaatacatggcacaaactgatattgatggggcattagtaggtggcgcagcgtttaaagacgtgccagcctatgatttaggtgcgactttaatagaacatattattaaagagacgggtttgaatccaagtgagattaatgaagtcatcatcggtaacgtactacaagcaggacaaggacaaaatccagcacgaattgctgctatgaaaggtggcttgccagaaacagtacctgcatttacagtgaataaagtatgtggttctgggttaaagtcgattcaattagcatatcaatctattgtgactggtgaaaatgacatcgtgctagctggcggtatggagaatatgtctcaatcaccaatgcttgtcaacaacagtcgctttggttttaaaatgggacatcaatcaatggttgatagcatggtatatgatggtttaacagatgtatttaatcaatatcatatgggtattactgctgaaaatttagtagagcaatatggtatttcaagagaagaacaagatacatttgctgtaaactcacaacaaaaagcagtacgtgcacaacaa
ttattaatccaacaagctaaatcgaacagtgacacaacgccggcaatgccattggatacttgtggtgcaatgtcacagggtatgataggctattggttggaaactgaaatcaatcgcattttaactgaaatgaatagtgatagaactgtaggcacaatcgttacacgtgtggaagtagataaaaatgatccacgatttgataacccaactaaaccaattggtcctttttatacgaaagaagaagttgaagaattacaaaaagaacagccagacttagtctttaaagaagatgcaggacgtggttatagaaaagtagttgcgtcaccactacctcaatctatactagaacaccagttaattcgaactttagcagacggtaaaaatattgtcattgcatgcggtggtggcggtattccagttataaaaaaagaaaatacctatgaaggtgttgaagcgaattttaattctttaggattagatgatacttatgaagctttaaatattccaattgaagattttcatttaattaaagaaattatttcaaaaaaagaattagatggctttaatatcacaattcctcataaagagcgtatcataccgtatttagatcatgttgatgaacaagcgattaatgcaggtgcagttaacactgttttgataaaagatggcaagtggatagggtataatacagatggtattggttatgtaaagggattgcacagcgtttatccagatttagaaaatgcatacattttaattttgggcgcaggtggtgcaagtaaaggtattgcttatgaattagcaaaatttgtaaagcccaaattaactgttgcgaatagaacgatggctcgttttgaatcttggaatttaaatataaaccaaatttcattggaagatgctgaaaagtatttaggtgctgattggattgtcatcacagctggatggggattagcggttacaatgggtgtgtatgctgtcggtcaattctcaggtgcacatttaaacccagcggtgtctttagctcttgcattagacggaagttttgattggtcattagttcctggttatattgttgctcaaatgttaggtgcaattgtcggagcaacaattgtatggttaatgtacttgccacattggaaagcgacagaagaagctggcgcgaaattaggtgttttctctacagcaccggctattaagaattactttgccaactttttaagtgagattatcggaacaatggcattaactttaggtattttatttatcggtgtaaacaaaattgccgatggtttaaatcctttaattgtcggagcattaattgttgcaatcggattaagtttaggcggtgctactggttatgcaatcaacccagcacgtcgaatatttgaagatccaagtacatcatataagtattctatttcaatgacaacacgtcaaatgcgtgaaggtgaagttgatggcgtagattacttttttaaaactagggatgcgtttgaagctttaattaaagatgaccaatttatagaatatgctgaatatgtaggcaactattatggtacaccagttcaatatgttaaagatacaatggacgaaggtcatgatgtatttttagaaattgaagtagaaggtgcaaagcaagttagaaagaaatttccagatgcgttatttattttcttagcacctccaagtttagatcacttgagagagcgattagtaggtagaggaacagaatctgatgagaaaatacaaagtcgtattaacgaagcacgtaaagaagtcgaaatgatgaatttatacgattacgttgcaacacaattacaagcaacagattatgttacaccaatcgtgttaggtgatgagactaaggttcaatctttagcgcaaaaacttaatcttgatatttctaatattgaattaattaatcctgcgacaagtgaattgaaagctgaattagttcaatcatttgttgaacgacgtaaaggtaaagcgactgaagaacaagcacaagaattattaaacaatgtgaactacttcggtacaatgcttgtttatgctggtaaagcagatggtctagttagtggtgcagcacattcaacaggcgacactgtgcgtccagctttacaaatcatcaaaacgaaaccaggtgtatcaagaacatcaggtatcttctttatgattaaaggtgatgaacaatacatctttggtgattgtgcaatcaatccagaacttgattcacaaggacttgcagaaattgcagtagaaagtgcaaaatcagcattacacgaaacagatgaagaaattaacaaaaaagcgcatgctattttcaaacatggaatgactccaattatttgtgttggtgaaacagacgaagagcgtgaaagtggtaaagctaacgatgttgtaggtgagcaagttaagaaagctgttgcaggtttatctgaagatcaacttaaatcagttataattgcttatgaaccaatttgggcaatcggaactggtaaatcatcaacatctgaagatgcgaatgaaatgtgtgcatttgtacgtcaaactattgctgacttatcaagcaaagaagtatcagaagcaactcgtattcaatatggtggtagtgttaaacctaacaacattaaagaatacatggcacaaactgatattgatggggcattagtaggtggcgcagcgtttaaagacgtgccagcctatgatttaggtgcgactttaatagaacatattattaaagagacgggtttgaatccaagtgagattaatgaagtcatcatcggtaacgtactacaagcaggacaaggacaaaatccagcacgaattgctgctatgaaaggtggcttgccagaaacagtacctgcatttacagtgaataaagtatgtggttctgggttaaagtcgattcaattagcatatcaatctattgtgactggtgaaaatgacatcgtgctagctggcggtatggagaatatgtctcaatcaccaatgcttgtcaacaacagtcgctttggttttaaaatgggacatcaatcaatggttgatagcatggtatatgatggtttaacagatgtatttaatcaatatcatatgggtattactgctgaaaatttagtagagcaatatggtatttcaagagaagaacaagatacatttgctgtaaactcacaacaaaaagcagtacgtgcacagcaa
ttattaatccaacaagctaaatcgaacagtgacacaacgccggcaatgccattggatacttgtggtgcaatgtcacagggtatgataggctattggttggaaactgaaatcaatcgcattttaactgaaatgaatagtgatagaactgtaggcacaatcgttacacgtgtggaagtagataaaaatgatccacgatttgataacccaactaaaccaattggtcctttttatacgaaagaagaagttgaagaattacaaaaagaacagccagactcagtctttaaagaagatgcaggacgtggttatagaaaagtagttgcgtcaccactacctcaatctatactagaacaccagttaattcgaactttagcagacggtaaaaatattgtcattgcatgcggtggtggcggtattccagttataaaaaaagaaaatacctatgaaggtgttgaagcgaattttaattctttaggattagatgatacttatgaagctttaaatattccaattgaagattttcatttaattaaagaaattatttcaaaaaaagaattagatggctttaatatcacaattcctcataaagaacgtatcataccgtatttagattatgttgatgaacaagcgattaatgcaggtgcagttaacactgttttgataaaagatggcaagtggatagggtataatacagatggtatcggttatgtgaaaggattgcacagcgtttatccagatttagaaaatgcatacattttaattttgggcgcaggtggtgcaagtaaaggtattgcttatgaattagcaaaatttgtaaagcccaaattaactgttgcgaatagaacgatggctcgttttgaatcttggaatttaaatataaaccaaatttcattggcagatgctgaaaagtatttaggtgctgattggattgtcatcacagctggatggggattagcggttacaatgggtgtgtatgctgtcggtcaattctcaggtgcacatttaaacccagcggtgtctttagctcttgcattagacggaagttttgattggtcattagttcctggttatattgttgcccaaatgttaggtgcaattgtcggagcaacgattgtatggttaatgtacttgccacattggaaagcgacagaagaagctggcgcgaaattaggtgttttctctacagcaccggctattaagaattactttgccaactttttaagtgagattatcggaacaatggcattaactttaggtattttatttatcggtgtaaacaaaattgccgatggtttaaatcctttaattgtcggagcattaattgttgcaatcggattaagtttaggcggtgctactggttatgcaatcaacccagcacgtcgaatatttgaagatccaagtacatcatataagtattctatttcaatgacaacacgtcaaatgcgtgaaggtgaagttgatggcgtagattacttttttaaaactagggatgcgtttgaagctttaattaaagatgaccaatttatagaatatgctgaatatgtaggcaactattatggtacaccagttcaatatgttaaagatacaatggacgaaggtcatgatgtatttttagaaattgaagtagaaggtgcaaagcaagttagaaagaaatttccagatgcgttatttattttcttagcacctccaagtttagatcacttgagagagcgattagtaggtagaggaacagaatctgatgagaaaatacaaagtcgtattaacgaagcacgtaaagaagtcgaaatgatgaatttatacgattacgttgcaacacaattacaagcaacagattatgttacaccaatcgtgttaggtgatgagactaaggttcaatctttagcgcaaaaacttaatcttgatatttctaatattgaattaattaatcctgcgacaagtgaattgaaagctgaattagttcaatcatttgttgaacgacgtaaaggtaaagcgactgaagaacaagcacaagaattattaaacaatgtgaactacttcggtacaatgcttgtttatactggtaaagcagatggtctagttagtggtgcagcacattcaacaggcgacactgtgcgtccagctttacaaatcatcaaaacgaaaccaggtgtatcaagaacatcaggtatcttctttatgattaaaggtgatgaacaacacatctttggtgattgtgcaatcaatccagaacttgattcacaaggacttgcagaaattgcagtagaaagtgcaaaatcagcattacacgaaacagatgaagaaattaacaaaaaagcgcatgctattttcaaacatggtatgacaccaattatttgtgttggtgaaacagacgaagagcgtgaaagcggtaaagctaacgatgttgtaggtgagcaagttaagaaagctgttgcaggtttatctgaagagcaacttaaatcagttgtaattgcttatgaaccaatctgggcaatcggaactggtaaatcatcaacatctgaagatgcgaatgaaatgtgtgcatttgtacgtcaaactattgctggcttatcaagtaaagaagtatcagaagcaactcgtattcaatatggtggtagtgttaaacctaacaacattaaagaatacatggcacaaactgatattgatggggcattagtaggtggcgcagcgtttaaagacgtgccagcctatgatttaggtgcgactttaatagaacatattattaaagagacgggtttgaatccaagtgagattaatgaagtcatcattggtaacgtactacaagcaggacaaggacaaaatccagcacgaattgctgctatgaaaggtggcttgccagaaacagtacctgcatttacagtgaataaagtatgtggttctgggttaaagtcgattcaattagcatatcaatctattgtgactggcgaaaatgacatcgtgctagctggcggtatggagaatatgtctcaatcaccaatgcttgtcaacaacagtcgctttggttttaaaatgggacatcaatcaatggttgatagcatggtatatgatggtttaacagatgtatttaatcaatatcatatgggtattactgctgaaaatttagtagagcaatatggtatttcaagagaagaacaagatacatttgctgtaaactcacaacaaaaagcagtacgtgcacagcaa
ttattaatccaacaagctaaatcgaacagtgacacaacgccggcaatgccattggatacttgtggtgcaatgtcacagggtatgataggctattggttggaaactgaaatcaatcgcattttaactgaaatgaatagtgatagaactgtaggcacaatcgttacacgtgtggaagtagataaagatgatccacgattcaataacccaaccaaaccaattggtcctttttatacgaaagaagaagttgaagaattacaaaaagaacagccagactcagtctttaaagaagatgcaggacgtggttatagaaaagtagttgcgtcaccactacctcaatctatactagaacaccagttaattcgaactttagcagacggtaaaaatattgtcattgcatgcggtggtggcggtattccagttataaaaaaagaaaatacctatgaaggtgttgaagcgaattttaattctttaggattagatgatacttatgaagctttaaatattccaattgaagattttcatttaattaaagaaattatttcgaaaaaagaattagatggctttaatatcacaattcctcataaagaacgtatcataccgtatttagatcatgttgatgaacaagcgattaatgcaggtgcagttaacactgttttgataaaagatgacaagtggatagggtataatacagatggtattggttatgttaaaggattgcacagcgtttatccagatttagaaaatgcatacattttaattttgggcgcaggtggtgcaagtaaaggtattgcttatgaattagcaaaatttgtaaagcccaaattaactgttgcgaatagaacgatggctcgttttgaatcttggaatttaaatataaaccaaatttcattagcagatgctgaaaagtatttaggtgctgattggattgtcatcacagctggatggggattagcggttacaatgggtgtgtttgctgtcggtcaattctcaggtgcacatttaaacccagcggtgtctttagctcttgcattagacggaagttttgattggtcattagttcctggttatattgttgctcaaatgttaggtgcaattgtcggagcaacaattgtatggttaatgtacttgccacattggaaagcgacagaagaagctggcgcgaaattaggtgttttctctacagcaccggctattaagaattactttgccaactttttaagtgagattatcggaacaatggcattaactttaggtattttatttatcggtgtaaacaaaattgccgatggtttaaatcctttaattgtcggagcattaattgttgcaatcggattaagtttaggcggtgctactggttatgcaatcaacccagcacgtcgaatatttgaagatccaagtacatcatataagtattctatttcaatgacaacacgtcaaatgcgtgaaggtgaagttgatggcgtagattacttttttaaaactagggatgcgtttgaagctttaatcaaagatgaccaatttatagaatatgctgaatatgtaggcaactattatggtacaccagttcaatatgttaaagatacaatggacgaaggtcatgatgtatttttagaaattgaagtagaaggtgcaaagcaagttagaaagaaatttccagatgcgctatttattttcttagcacctccaagtttagaacacttgagagagcgattagtaggtagaggaacagaatctgatgagaaaatacaaagtcgtattaacgaagcgcgtaaagaagttgaaatgatgaatttatacgattacgttgcaacacaattacaagcaacagattatgttacaccaatcgtgttaggtgatgagactaaggttcaatctttagcgcaaaaacttgatcttgatatttctaatattgaattaattaatcctgcgacaagtgaattgaaagctgaattagttcaatcatttgttgaacgacgtaaaggtaaagcgactgaagaacaagcacaagaattattaaacaatgtgaactacttcggtacaatgcttgtttatgctggtaaagcagatggtttagttagtggtgcagcacattcaacaggagacactgtgcgtccagctttacaaatcatcaaaacgaaaccaggtgtatcaagaacatcaggtatcttctttatgattaaaggtgatgtacaatacatctttggtgattgtgcaatcaatccagaacttgattcacaaggacttgcagaaattgcagtagaaagtgcaaaatcagcattacacgaaacagatgaagaaattaacaaaaaagcgcacgctattttcaaacatggaatgactccaattatttgtgttggtgaaacagacgaagagcgtgaaagtggtaaagctaacgatgttgtaggtgagcaagttaagaaagctgttgcaggtttatctgaagatcaacttaaatcagttgtaattgcttatgagccaatctgggcaatcggaactggtaaatcatcaacatctgaagatgcaaatgaaatgtgtgcatttgtacgtcaaactattgctgacttatcaagcaaagaagtatcagaagcaactcgtattcaatatggtggtagtgttaaacctaacaacattaaagaatacatggcacaaactgatattgatggggcattagtaggtggcgcagcgtttaaagacgtgccagcctatgatttaggtgcgactttaatagaacatattattaaagagacgggtttgaatccaagtgagattgatgaagttatcatcggtaacgtactacaagcaggacaaggacaaaatccagcacgaattgctgctatgaaaggtggcttgccagaaacagtacctgcatttacagtgaataaagtatgtggttctgggttaaagtcgattcaattagcatatcaatctattgtgactggtgaaaatgacatcgtgctagctggcggtatggagaatatgtctcagtcaccaatgcttgtcaacaacagtcgcttcggttttaaaatgggacatcaatcaatggttgatagcatggtatatgatggtttaacagatgtatttaatcaatatcatatgggtattactgctgaaaatttagtggagcaatatggtatttcaagagaagaacaagatacatttgctgtaaactcacaacaaaaagcagtacgtgcacagcaa
ttattaatccaacaagctaaatcgaacagtgacacaacgccggcaatgccattggatacttgtggtgcaatgtcacagggtatgataggctattggttggaaactgaaatcaatcgcattttaactgaaatgaatagtgatagaactgtaggcacaatcgttacacgtgtggaagtagataaagatgatccacgattcaataacccaaccaaaccaattggtcctttttatacgaaagaagaagttgaagaattacaaaaagaacagccagactcagtctttaaagaagatgcaggacgtggttatagaaaagtagttgcgtcaccactacctcaatctatactagaacaccagttaattcgaactttagcagacggtaaaaatattgtcattgcatgcggtggtggcggtattccagttataaaaaaagaaaatacctatgaaggtgttgaagcgaattttaattctttaggattagatgatacttatgaagctttaaatattccaattgaagattttcatttaattaaagaaattatttcgaaaaaagaattagatggctttaatatcacaattcctcataaagaacgtatcataccgtatttagatcatgttgatgaacaagcgattaatgcaggtgcagttaacactgttttgataaaagatgacaagtggatagggtataatacagatggtattggttatgttaaaggattgcacagcgtttatccagatttagaaaatgcatacattttaattttgggcgcaggtggtgcaagtaaaggtattgcttatgaattagcaaaatttgtaaagcccaaattaactgttgcgaatagaacgatggctcgttttgaatcttggaatttaaatataaaccaaatttcattagcagatgctgaaaagtatttaggtgctgattggattgtcatcacagctggatggggattagcggttacaatgggtgtgtttgctgtcggtcaattctcaggtgcacatttaaacccagcggtgtctttagctcttgcattagacggaagttttgattggtcattagttcctggttatattgttgctcaaatgttaggtgcaattgtcggagcaacaattgtatggttaatgtacttgccacattggaaagcgacagaagaagctggcgcgaaattaggtgttttctctacagcaccggctattaagaattactttgccaactttttaagtgagattatcggaacaatggcattaactttaggtattttatttatcggtgtaaacaaaattgccgatggtttaaatcctttaattgtcggagcattaattgttgcaatcggattaagtttaggcggtgctactggttatgcaatcaacccagcacgtcgaatatttgaagatccaagtacatcatataagtattctatttcaatgacaacacgtcaaatgcgtgaaggtgaagttgatggcgtagattacttttttaaaactagggatgcgtttgaagctttaatcaaagatgaccaatttatagaatatgctgaatatgtaggcaactattatggtacaccagttcaatatgttaaagatacaatggacgaaggtcatgatgtatttttagaaattgaagtagaaggtgcaaagcaagttagaaagaaatttccagatgcgctatttattttcttagcacctccaagtttagaacacttgagagagcgattagtaggtagaggaacagaatctgatgagaaaatacaaagtcgtattaacgaagcgcgtaaagaagttgaaatgatgaatttatacgattacgttgcaacacaattacaagcaacagattatgttacaccaatcgtgttaggtgatgagactaaggttcaatctttagcgcaaaaacttgatcttgatatttctaatattgaattaattaatcctgcgacaagtgaattgaaagctgaattagttcaatcatttgttgaacgacgtaaaggtaaagcgactgaagaacaagcacaagaattattaaacaatgtgaactacttcggtacaatgcttgtttatgctggtaaagcagatggtttagttagtggtgcagcacattcaacaggagacactgtgcgtccagctttacaaatcatcaaaacgaaaccaggtgtatcaagaacatcaggtatcttctttatgattaaaggtgatgtacaatacatctttggcgattgtgcaatcaatccagaacttgattcacaaggacttgcagaaattgcagtagaaagtgcaaaatcagcattacacgaaacagatgaagaaattaacaaaaaagcgcacgctattttcaaacatggaatgactccaattatttgtgttggtgaaacagacgaagagcgtgaaagtggtaaagctaacgatgttgtaggtgagcaagttaagaaagctgttgcaggtttatctgaagatcaacttaaatcagttgtaattgcttatgagccaatctgggcaatcggaactggtaaatcatcaacatctgaagatgcaaatgaaatgtgtgcatttgtacgtcaaactattgctgacttatcaagcaaagaagtatcagaagcaactcgtattcaatatggtggtagtgttaaacctaacaacattaaagaatacatggcacaaactgatattgatggggcattagtaggtggcgcagcgtttaaagacgtgccagcctatgatttaggtgcgactttaatagaacatattattaaagagacgggtttgaatccaagtgagattgatgaagttatcatcggtaacgtactacaagcaggacaaggacaaaatccagcacgaattgctgctatgaaaggtggcttgccagaaacagtacctgcatttacagtgaataaagtatgtggttctgggttaaagtcgattcaattagcatatcaatctattgtgactggtgaaaatgacatcgtgctagctggcggtatggagaatatgtctcagtcaccaatgcttgtcaacaacagtcgcttcggttttaaaatgggacatcaatcaatggttgatagcatggtatatgatggtttaacagatgtatttaatcaatatcatatgggtattactgctgaaaatttagtggagcaatatggtatttcaagagaagaacaagatacatttgctgtaaactcacaacaaaaagcagtacgtgcacagcaa
ttattaatccaacaagctaaatcgaacagtgacacaacgccggcaatgccattggatacttgtggtgcaatgtcacagggtatgataggctattggttggaaactgaaatcaatcgcattttaactgaaatgaatagtgatagaactgtaggcacaatcgttacacgtgtggaagtagataaagatgatccacgattcaataacccaaccaaaccaattggtcctttttatacgaaagaagaagttgaagaattacaaaaagaacagccagactcagtctttaaagaagatgcaggacgtggttatagaaaagtagttgcgtcaccactacctcaatctatactagaacaccagttaattcgaactttagcagacggtaaaaatattgtcattgcatgcggtggtggcggtattccagttataaaaaaagaaaatacctatgaaggtgttgaagcgaattttaattctttaggattagatgatacttatgaagctttaaatattccaattgaagattttcatttaattaaagaaattatttcgaaaaaagaattagatggctttaatatcacaattcctcataaagaacgtatcataccgtatttagattatgttgatgaacaagcgattaatgcaggtgcagttaacactgttttgataaaagatggcaagtggatagggtataatacagatggtattggttatgttaaaggattgcacagcgtttatccagatttagaaaatgcatacattttaattttgggcgcaggtggtgcaagtaaaggtattgcttatgaattagcaaaatttgtaaagcccaaattaactgttgcgaatagaacgatggctcgttttgaatcttggaatttaaatataaaccaaatttcattggcagatgctgaaaagtatttaggtgctgattggattgtcatcacagctggatggggattagcggttacaatgggtgtgtttgctgtcggtcaattctcaggtgcacatttaaacccagcggtgtctttagctcttgcattagacggaagttttgattggtcattagttcctggttatattgttgctcaaatgttaggtgcaattgtcggagcaacaattgtatggttaatgtacttgccacattggaaagcgacagaagaagctggcgcgaaattaggtgttttctctacagcaccggctattaagaattactttgccaactttttaagtgagattatcggaacaatggcattaactttaggtattttatttatcggtgtaaacaaaattgccgatggtttaaatcctttaattgtcggagcattaattgttgcaatcggattaagtttaggcggtgctactggttatgcaatcaacccagcacgtcgaatatttgaagatccaagtacatcatataagtattctatttcaatgacaacacgtcaaatgcgtgaaggtgaagttgatggcgtagattacttttttaaaactagggatgcgtttgaagctttaattaaagatgaccaatttatagaatatgctgaatatgtaggcaactattatggtacaccagttcaatatgttaaagatacaatggacgaaggtcatgatgtatttttagaaattgaagtagaaggtgcaaagcaagttagaaagaaatttccagatgcgttatttattttcttagcacctccaagtttagatcacttgagagagcgattagtaggtagaggaacagaatccaatgagaaaatacaaagtcgtattaacgaagcgcgtaaagaagttgaaatgatgaatttatacgattacgttgcaacacaattacaagcaacagattatgttacaccaatcgtgttaggtgatgagactaaggttcaatctttagcgcaaaaacttgatcttgatatttctaatattgaattaattaatcctgcgacaagtgaattgaaagctgaattagttcaatcatttgttgaacgacgtaaaggtaaagcgactgaagaacaagcacaagaattattaaacaatgtgaactacttcggtacaatgcttgtttatgctggtaaagcagatggtttagttagtggtgcagcacattcaacaggagacactgtgcgtccagctttacaaatcatcaaaacgaaaccaggtgtatcaagaacatcaggtatcttctttatgattaaaggtgatgaacaatacatctttggtgattgtgcaatcaatccagaacttgcttcacaaggacttgcagaaattgcagtagaaagtgcaaaatcagcattacacgaaacagatgaagaaattaacaaaaaagcgcacgctattttcaaacatggaatgactccaattatttgtgttggtgaaacagaagaagagcgtgaaagtggtaaagctaacgatgttgtaggtgagcaagttaagaaagctgttgcaggtttatctgaagatcaacttaaatcagttgtaattgcttatgagccaatctgggcaatcggaactggtaaatcatcaacatctgaagatgcaaatgaaatgtgtgcatttgtacgtcaaactattgctgacttatcaagcaaagaagtatcagaagcaactcgtattcaatatggtggtagtgttaaacctaacaacattaaagaatacatggcacaaactgatattgatggggcattagtaggtggcgcagcgtttaaagacgtgccagcctatgatttaggtgcgactttaatagaacatattattaaagagacgggtttgaatccaagtgagattgatgaagttatcatcggtaacgtactacaagcaggacaaggacaaaatccagcacgaattgctgctatgaaaggtggcttgccagaaacagtacctgcatttacagtgaataaagtatgtggttctgggttaaagtcgattcaattagcatatcaatctattgtgactggtgaaaatgacatcgtgctagctggcggtatggagaatatgtctcagtcaccaatgcttgtcaacaacagtcgcttcggttttaaaatgggacatcaatcaatggttgatagcatggtatatgatggtttaacagatgtatttaatcaatatcatatgggtattactgctgaaaatttagtagagcaatatggtatttcaagagaagaacaagatacatttgctgtaaactcacaacataaagcagtatgtgcacagcaa
ttattaatccaacaagctaaatcgaacagtgacacaacgccggcaatgccattggatacttgtggtgcaatgtcacagggtatgataggctattggttggaaactgaaatcaatcgcattttaactgaaatgaatagtgatagaactgtaggcacaatcgttacacgtgtggaagtagataaagatgatccacgattcaataacccaaccaaaccaattggtcctttttatacgaaagaagaagttgaagaattacaaaaagaacagccagactcagtctttaaagaagatgcaggacgtggttatagaaaagtagttgcgtcaccactacctcaatctatactagaacaccagttaattcgaactttagcagacggtaaaaatattgtcattgcatgcggtggtggcggtattccagttataaaaaaagaaaatacctatgaaggtgttgaagcgaattttaattctttaggattagatgatacttatgaagctttaaatattccaattgaagattttcatttaattaaagaaattatttcgaaaaaagaattagatggctttaatatcacaattcctcataaagaacgtatcataccgtatttagatcatgttgatgaacaagcgattaatgcaggtgcagttaacactgttttgataaaagatgacaagtggatagggtataatacagatggtattggttatgttaaaggattgcacagcgtttatccagatttagaaaatgcatacattttaattttgggcgcaggtggtgcaagtaaaggtattgcttatgaattagcaaaatttgtaaagcccaaattaactgttgcgaatagaacgatggctcgttttgaatcttggaatttaaatataaaccaaatttcattagcagatgctgaaaagtatttaggtgctgattggattgtcatcacagctggatggggattagcggttacaatgggtgtgtttgctgtcggtcaattctcaggtgcacatttaaacccagcggtgtctttagctcttgcattagacggaagttttgattggtcattagttcctggttatattgttgctcaaatgttaggtgcaattgtcggagcaacaattgtatggttaatgtacttgccacattggaaagcgacagaagaagctggcgcgaaattaggtgttttctctacagcaccggctattaagaattactttgccaactttttaagtgagattatcggaacaatggcattaactttaggtattttatttatcggtgtaaacaaaattgccgatggtttaaatcctttaattgtcggagcattaattgttgcaatcggattaagtttaggcggtgctactggttatgcaatcaacccagcacgtcgaatatttgaagatccaagtacatcatataagtattctatttcaatgacaacacgtcaaatgcgtgaaggtgaagttgatggcgtagattacttttttaaaactagggatgcgtttgaagctttaatcaaagatgaccaatttatagaatatgctgaatatgtaggcaactattatggtacaccagttcaatatgttaaagatacaatggacgaaggtcatgatgtatttttagaaattgaagtagaaggtgcaaagcaagttagaaagaaatttccagatgcgctatttattttcttagcacctccaagtttagaacacttgagagagcgattagtaggtagaggaacagaatctgatgagaaaatacaaagtcgtattaacgaagcgcgtaaagaagttgaaatgatgaatttatacgattacgttgcaacacaattacaagcaacagattatgttacaccaatcgtgttaggtgatgagactaaggttcaatctttagcgcaaaaacttgatcttgatatttctaatattgaattaattaatcctgcgacaagtgaattgaaagctgaattagttcaatcatttgttgaacgacgtaaaggtaaagcgactgaagaacaagcacaagaattattaaacaatgtgaactacttcggtacaatgcttgtttatgctggtaaagcagatggtttagttagtggtgcagcacattcaacaggcgacactgtgcgtccagctttacaaatcatcaaaacgaaaccaggtgtatcaagaacatcaggtatcttctttatgattaaaggtgatgaacaatacatctttggtgattgtgcaatcaatccagaacttgattcacaaggacttgcagaaattgcagtagaaagtgcaaaatcagcattacacgaaacagatgaagaaattaacaaaaaagcgcacgctattttcaaacatggaatgactccaattatttgtgttggtgaaacagacgaagagcgtgaaagtggtaaagctaacgatgttgtaggtgagcaagttaagaaagctgttgcaggtttatctgaagatcaacttaaatcagttgtaattgcttatgaaccaatctgggcaatcggaactggtaaatcatcaacatctgaagatgcaaatgaaatgtgtgcatttgtacgtcaaactattgctgacttatcaagcaaagaagtatcagaagcaactcgtattcaatatggtggtagtgttaaacctaacaacattaaagaatacatggcacaaactgatattgatggggcattagtaggtggcgcagcgtttaaagacgtgccagcctatgatttaggtgcgactttaatagaacatattattaaagagacgggtttgaatccaagtgagattgatgaagttatcatcggtaacgtactacaagcaggacaaggacaaaatccagcacgaattgctgctatgaaaggtggcttgccagaaacagtacctgcatttacagtgaataaagtatgtggttctgggttaaagtcgattcaattagcatatcaatctattgtgactggtgaaaatgacatcgtgctagctggcggtatggagaatatgtctcagtcaccaatgcttgtcaacaacagtcgcttcggttttaaaatgggacatcaatcaatggttgatagcatggtatatgatggtttaacagatgtatttaatcaatatcatatgggtattactgctgaaaatttagtggagcaatatggtatttcaagagaagaacaagatacatttgctgtaaactcacaacaaaaagcagtacgtgcacagcaa
ttattaatccaacaagctaaatcgaacagtgacacaacgccggcaatgccattggatacttgtggtgcaatgtcacagggtatgataggctattggttggaaactgaaatcaatcgcattttaactgaaatgaatagtgatagaactgtaggcacaatcgttacacgtgtggaagtagataaagatgatccacgattcaataacccaaccaaaccaattggtcctttttatacgaaagaagaagttgaagaattacaaaaagaacagccagactcagtctttaaagaagatgcaggacgtggttatagaaaagtagttgcgtcaccactacctcaatctatactagaacaccagttaattcgaactttagcagacggtaaaaatattgtcattgcatgcggtggtggcggtattccagttataaaaaaagaaaatacctatgaaggtgttgaagcgaattttaattctttaggattagatgatacttatgaagctttaaatattccaattgaagattttcatttaattaaagaaattatttcgaaaaaagaattagaaggctttaatatcacaattcctcataaagaacgtatcataccgtatttagattatgttgatgaacaagcgattaatgcaggtgcagttaacactgttttgataaaagatggcaagtggatagggtataatacagatggtattggttatgttaaaggattgcacagcgtttatccagatttagaaaatgcatacattttaattttgggcgcaggtggtgcaagtaaaggtattgcttatgaattagcaaaatttgtaaagcccaaattaactgttgcgaatagaacgatggctcgttttgaatcttggaatttaaatataaaccaaatttcattagcagatgctgaaaagtatttaggtgctgattggattgtcatcacagctggatggggattagcggttacaatgggtgtgtttgctgtcggtcaattctcaggtgcacatttaaacccagcggtgtctttagctcttgcattagacggaagttttgattggtcattagttcctggttatattgttgctcaaatgttaggtgcaattgtcggagcaacaattgtatggttaatgtacttgccacattggaaagcgacagaagaagctggcgcgaaattaggtgttttctctacagcaccggctattaagaattactttgccaactttttaagtgagattatcggaacaatggcattaactttaggtattttatttatcggtgtaaacaaaattgccgatggtttaaatcctttaattgtcggagcattaattgttgcaatcggattaagtttaggcggtgctactggttatgcaatcaacccagcacgtcgaatatttgaagatccaagtacatcgtataagtattctatttcaatgacaacacgtcaaatgcgtgaaggtgaagttgatggcgtagattacttttttaaaactagggatgcgtttgaagctttaattaaagatgaccaatttatagaatatgctgaatatgtaggcaactattatggtacaccagttcaatatgttaaagatacaatggacgaaggtcatgatgtatttttagaaattgaagtagaaggtgcaaagcaagttagaaagaaatttccagatgcgttatttattttcttagcacctccaagtttagatcacttgagagagcgattagtaggtagaggaacagaatccaatgagaaaatacaaagtcgtattaacgaagcgcgtaaagaagttgaaatgatgaatttatacgattacgttgcaacacaattacaagcaacagattatgttacaccaatcgtgttaggtgatgagactaaggttcaatctttagcgcaaaaacttaatcttgatatttctaatattgaattaattaatcctgcgacaagtgaattgaaagctgaattagtccaatcatttgttgaacgacgtaaaggtaaagcgactgaagaacaagcgcaagaattattaaacaatgtgaactacttcggtacaatgcttgtttatgctggtaaagcagatggtttagttagtggtgcagcacattcaacaggcgacactgtgcgtccagctttacaaatcatcaaaacgaaaccaggtgtatcaagaacatcaggtatcttctttatgattaaaggtgatgaacaatacatctttggtgattgtgcaatcaatccagaacttgattcacaaggacttgcagaaattgcagtagaaagtgcaaaatcagcattacacgaaacagatgaagaaattaacaaaaaagcgcacgctattttcaaacatggaatgactccaattatatgtgttggtgaaacagacgaagagcgtgaaagtggtaaagctaacgatgttgtaggtgagcaagttaagaaagctgttgcaggtttatctgaaaatcaactaaaatcagttgtaattgcttatgaaccaatctgggcaatcggaactggtaaatcatcaacatctgaagatgcgaatgaaatgtgtgcatttgtacgtcaaactattgctgacttatcaagcaaagaagtatcagaagcaactcgtattcaatatggtggtagtgttaaacctaacaacattaaagaatacatggcacaaactgatattgatggggcattagtaggtggcgcagcgtttaaagacgtgccagcctatgatttaggtgcgactttaatagaacatattattaaagagacgggtttgaatccaagtgagattgatgaagttatcatcggtaacgtactacaagcaggacaaggacaaaatccagcacgaattgctgctatgaaaggtggcttgccagaaacagtacctgcatttacagtgaataaagtatgtggttctgggttaaagtcgattcaattagcatatcaatctattgtgactggtgaaaatgacatcgtgctagctggcggtatggagaatatgtctcaatcaccaatgcttgtcaacaacagtcgctttggttttaaaatgggacatcaatcaatggttgatagcatggtatatgatggtttaacagatgtatttaatcaatatcatatgggtattactgctgaaaatttagtagagcaatatggtatttcaagagaagaacaagatacatttgctgtaaactcacaacaaaaagcagtacgtgcacagcaa
ttattaatccaacaagctaaatcgaacagtgacacaacgccggcaatgccattggatacttgtggtgcaatgtcacagggtatgataggctattggttggaaactgaaatcaatcgcattttaactgaaatgaatagtgatagaactgtaggcacaatcgttacacgtgtggaagtagataaagatgatccacgattcaataacccaaccaaaccaattggtcctttttatacgaaagaagaagttgaagaattacaaaaagaacagccagactcagtctttaaagaagatgcaggacgtggttatagaaaagtagttgcgtcaccactacctcaatctatactagaacaccagttaattcgaactttagcagacggtaaaaatattgtcattgcatgcggtggtggcggtattccagttataaaaaaagaaaatacctatgaaggtgttgaagcgaattttaattctttaggattagatgatacttatgaagctttaaatattccaattgaagattttcatttaattaaagaaattatttcgaaaaaagaattagatggctttaatatcacaattcctcataaagaacgtatcataccgtatttagattatgttgatgaacaagcgattaatgcaggtgcagttaacactgttttgataaaagatggcaagtggatagggtataatacagatggtattggttatgttaaaggattgcacagcgtttatccagatttagaaaatgcatacattttaattttgggcgcaggtggtgcaagtaaaggtattgcttatgaattagcaaaatttgtaaagcccaaattaactgttgcgaatagaacgatggctcgttttgaatcttggaatttaaatataaaccaaatttcattggcagatgctgaaaagtatttaggtgctgattggattgtcatcacagctggatggggattagcggttacaatgggtgtgtttgctgtcggtcaattctcaggtgcacatttaaacccagcggtgtctttagctcttgcattagacggaagttttgattggtcattagttcctggttatattgttgctcaaatgttaggtgcaattgtcggagcaacaattgtatggttaatgtacttgccacattggaaagcgacagaagaagctggcgcgaaattaggtgttttctctacagcaccggctattaagaattactttgccaactttttaagtgagattatcggaacaatggcattaactttaggtattttatttatcggtgtaaacaaaattgccgatggtttaaatcctttaattgtcggagcattaattgttgcaatcggattaagtttaggcggtgctactggttatgcaatcaacccagcacgtcgaatatttgaagatccaagtacatcatataagtattctatttcaatgacaacacgtcaaatgcgtgaaggtgaagttgatggcgtagattacttttttaaaactagggatgcgtttgaagctttaattaaagatgaccaatttatagaatatgctgaatatgtaggcaactattatggtacaccagttcaatatgttaaagatacaatggacgaaggtcatgatgtatttttagaaattgaagtagaaggtgcaaagcaagttagaaagaaatttccagatgcgttatttattttcttagcacctccaagtttagatcacttgagagagcgattagtaggtagaggaacagaatccaatgagaaaatacaaagtcgtattaacgaagcgcgtaaagaagttgaaatgatgaatttatacgattacgttgcaacacaattacaagcaacagattatgttacaccaatcgtgttaggtgatgagactaaggttcaatctttagcgcaaaaacttgatcttgatatttctaatattgaattaattaatcctgcgacaagtgaattgaaagctgaattagttcaatcatttgttgaacgacgtaaaggtaaagcgactgaagaacaagcacaagaattattaaacaatgtgaactacttcggtacaatgcttgtttatgctggtaaagcagatggtttagttagtggtgcagcacattcaacaggagacactgtgcgtccagctttacaaatcatcaaaacgaaaccaggtgtatcaagaacatcaggtatcttctttatgattaaaggtgatgaacaatacatctttggtgattgtgcaatcaatccagaacttgattcacaaggacttgcagaaattgcagtagaaagtgcaaaatcagcattacacgaaacagatgaagaaattaacaaaaaagcgcacgctattttcaaacatggaatgactccaattatttgtgttggtgaaacagacgaagagcgtgaaagtggtaaagctaacgatgttgtaggtgagcaagttaagaaagctgttgcaggtttatctgaagatcaacttaaatcagttgtaattgcttatgagccaatctgggcaatcggaactggtaaatcatcaacatctgaagatgcaaatgaaatgtgtgcatttgtacgtcaaactattgctgacttatcaagcaaagaagtatcagaagcaactcgtattcaatatggtggtagtgttaaacctaacaacattaaagaatacatggcacaaactgatattgatggggcattagtaggtggcgcagcgtttaaagacgtgccagcctatgatttaggttcgactttaatagaacatattattaaagagacgggtttgaatccaagtgagattgatgaagttatcatcggtaacgtactacaagcaggacaaggacaaaatccagcacgaattgctgctatgaaaggtggcttgccagaaacagtacctgcatttacagtgaataaagtatgtggttctgggttaaagtcgattcaattagcatatcaatctattgtgactggtgaaaatgacatcgtgctagctggcggtatggagaatatgtctcagtcaccaatgcttgtcaacaacagtcgcttcggttttaaaatgggacatcaatcaatggttgatagcatggtatatgatggtttaacagatgtatttaatcaatatcatatgggtattactgctgaaaatttagtagagcaatatggtatttcaagagaagaacaagatacatttgctgtaaactcacaacataaagcagtacgtgcacagcaa
ttattaatccaacaagctaaatcgaacagtgacacaacgccggcaatgccattggatacttgtggtgcaatgtcacagggtatgataggctattggttggaaactgaaatcaatcgcattttaactgaaatgaatagtgatagaactgtaggcacaatcgttacacgtgtggaagtagataaagatgatccacgattcaataacccaaccaaaccaattggtcctttttatacgaaagaagaagttgaagaattacaaaaagaacagccagactcagtctttaaagaagatgcaggacgtggttatagaaaagtagttgcgtcaccactacctcaatctatactagaacaccagttaattcgaactttagcagacggtaaaaatattgtcattgcatgcggtggtggcggtattccagttataaaaaaagaaaatacctatgaaggtgttgaagcgaattttaattctttaggattagatgatacttatgaagctttaaatattccaattgaagattttcatttaattaaagaaattatttcgaaaaaagaattagatggctttaatatcacaattcctcataaagaacgtatcataccgtatttagatcatgttgatgaacaagcgattaatgcaggtgcagttaacactgttttgataaaagatgacaagtggatagggtataatacagatggtattggttatgttaaaggattgcacagcgtttatccagatttagaaaatgcatacattttaattttgggcgcaggtggtgcaagtaaaggtattgcttatgaattagcaaaatttgtaaagcccaaattaactgttgcgaatagaacgatggctcgttttgaatcttggaatttaaatataaaccaaatttcattagcagatgctgaaaagtatttaggtgctgattggattgtcatcacagctggatggggattagcggttacaatgggtgtgtttgctgtcggtcaattctcaggtgcacatttaaacccagcagtgtctttagctcttgcattagacggaagttttgattggtcattagttcctggttatattgttgctcaaatgttaggtgcaattgtcggagcaacaattgtatggttaatgtacttgccacattggaaagcgacagaagaagctggcgcgaaattaggtgttttctctacagcaccggctattaagaattactttgccaactttttaagtgagattatcggaacaatggcattaactttaggtattttatttatcggtgtaaacaaaattgccgatggtttaaatcctttaattgtcggagcattaattgttgcaatcggattaagtttaggcggtgctactggttatgcaatcaacccagcacgtcgaatatttgaagatccaagtacatcatataagtattctatttcaatgacaacacgtcaaatgcgtgaaggtgaagttgatggcgtagattacttttttaaaactagggatgcgtttgaagctttaatcaaagatgaccaatttatagaatatgctgaatatgtaggcaactattatggtacaccagttcaatatgttaaagatacaatggacgaaggtcatgatgtatttttagaaattgaagtagaaggtgcaaagcaagttagaaagaaatttccagatgcgctatttattttcttagcacctccaagtttagaacacttgagagagcgattagtaggtagaggaacagaatctgatgagaaaatacaaagtcgtattaacgaagcgcgtaaagaagttgaaatgatgaatttatacgattacgttgcaacacaattacaagcaacagattatgttacaccaatcgtgttaggtgatgagactaaggttcaatctttagcgcaaaaacttgatcttgatatttctaatattgaattaattaatcctgcgacaagtgaattgaaagctgaattagttcaatcatttgttgaacgacgtaaaggtaaagcgactgaagaacaagcacaagaattattaaacaatgtgaactacttcggtacaatgcttgtttatgctggtaaagcagatggtttagttagtggtgcagcacattcaacaggagacactgtgcgtccagctttacaaatcatcaaaacgaaaccaggtgtatcaagaacatcaggtatcttctttatgattaaaggtgatgtacaatacatctttggtgattgtgcaatcaatccagaacttgattcacaaggacttgcagaaattgcagtagaaagtgcaaaatcagcattacacgaaacagatgaagaaattaacaaaaaagcgcacgctattttcaaacatggaatgactccaattatttgtgttggtgaaacagacgaagagcgtgaaagtggtaaagctaacgatgttgtaggtgagcaagttaagaaagctgttgcaggtttatctgaagatcaacttaaatcagttgtaattgcttatgagccaatctgggcaatcggaactggtaaatcatcaacatctgaagatgcaaatgaaatgtgtgcatttgtacgtcaaactattgctgacttatcaagcaaagaagtatcagaagcaactcgtattcaatatggtggtagtgttaaacctaacaacattaaagaatacatggcacaaactgatattgatggggcattagtaggtggcgcagcgtttaaagacgtgccagcctatgatttaggtgcgactttaatagaacatattattaaagagacgggtttgaatccaagtgagattgatgaagttatcatcggtaacgtactacaagcaggacaaggacaaaatccagcacgaattgctgctatgaaaggtggcttgccagaaacagtacctgcatttacagtgaataaagtatgtggttctgggttaaagtcgattcaattagcatatcaatctattgtgactggtgaaaatgacatcgtgctagctggcggtatggagaatatgtctcagtcaccaatgcttgtcaacaacagtcgcttcggttttaaaatgggacatcaatcaatggttgatagcatggtatatgatggtttaacagatgtatttaatcaatatcatatgggtattactgctgaaaatttagtggagcaatatggtatttcaagagaagaacaagatacatttgctgtaaactcacaacaaaaagcagtacgtgcacagcaa
ttattaatccaacaagctaaatcgaacagtgacacaacgccggcaatgccattggatacttgtggtgcaatgtcacagggtatgataggctattggttggaaactgaaatcaatcgcattttaactgaaatgaatagtgatagaactgtaggcacaatcgttacacgtgtggaagtagataaagatgatccacgattcaataacccaaccaaaccaattggtcctttttatacgaaagaagaagttgaagaattacaaaaagaacagccagactcagtctttaaagaagatgcaggacgtggttatagaaaagtagttgcgtcaccactacctcaatctatactagaacaccagttaattcgaactttagcagacggtaaaaatattgtcattgcatgcggtggtggcggtattccagttataaaaaaagaaaatacctatgaaggtgttgaagcgaattttaattctttaggattagatgatacttatgaagctttaaatattccaattgaagattttcatttaattaaagaaattatttcgaaaaaagaattagaaggctttaatatcacaattcctcataaagaacgtatcataccgtatttagattatgttgatgaacaagcgattaatgcaggtgcagttaacactgttttgataaaagatggcaagtggatagggtataatacagatggtattggttatgttaaaggattgcacagcgtttatccagatttagaaaatgcatacattttaattttgggcgcaggtggtgcaagtaaaggtattgcttatgaattagcaaaatttgtaaagcccaaattaactgttgcgaatagaacgatggctcgttttgaatcttggaatttaaatataaaccaaatttcattagcagatgctgaaaagtatttaggtgctgattggattgtcatcacagctggatggggattagcggttacaatgggtgtgtttgctgtcggtcaattctcaggtgcacatttaaacccagcggtgtctttagctcttgcattagacggaagttttgattggtcattagttcctggttatattgttgctcaaatgttaggtgcaattgtcggagcaacaattgtatggttaatgtacttgccacattggaaagcgacagaagaagctggcgcgaaattaggtgttttctctacagcaccggctattaagaattactttgccaactttttaagtgagattatcggaacaatggcattaactttaggtattttatttatcggtgtaaacaaaattgccgatggtttaaatcctttaattgtcggagcattaattgttgcaatcggattaagtttaggcggtgctactggttatgcaatcaacccagcacgtcgaatatttgaagatccaagtacatcatataagtattctatttcaatgacaacacgtcaaatgcgtgaaggtgaagttgatggcgtagattacttttttaaaactagggatgcgtttgaagctttaatcaaagatgaccaatttatagaatatgctgaatatgtaggcaactattatggtacaccagttcaatatgttaaagatacaatggacgaaggtcatgatgtatttttagaaattgaagtagaaggtgcaaagcaagttagaaagaaatttccagatgcgctatttattttcttagcacctccaagtttagaacacttgagagagcgattagtaggtagaggaacagaatctgatgagaaaatacaaagtcgtattaacgaagcgcgtaaagaagttgaaatgatgaatttatacgattacgttgcaacacaattacaagcaacagattatgttacaccaatcgtgttaggtgatgagactaaggttcaatctttagcgcaaaaacttaatcttgatatttctaatattgaattaattaatcctgcgacaagtgaattgaaagctgaattagttcaatcatttgttgaacgacgtaaaggtaaaacgactgaagaacaagcacaagaattattaaacaatgtgaactacttcggtacaatgcttgtttatgctggtaaagcagatggtttagttagtggtgcagcacattcaacaggcgacactgtgcgtccagctttacaaatcatcaaaacgaaaccaggtgtatcaagaacatcaggtatcttctttatgattaaaggtgatgaacagtacatctttggtgattgtgcaatcaatccagaacttgattcacaaggacttgcagaaattgcagtagaaagtgcaaaatcagcattacacgaaacagatgaagaaattaacaaaaaagcgcacgctattttcaaacatggaatgactccaattatatgtgttggtgaaacagacgaagagcgtgaaagtggtaaagctaacgatgttgtaggtgagcaagttaagaaagctgttgcaggtttatctgaagatcaacttaaatcagttgtaattgcttatgaaccaatctgggcaatcggaactggtaaatcatcaacatctgaagatgcaaatgaaatgtgtgcatttgtacgtcaaactattgctgacttatcaagcaaagaagtatcagaagcaactcgtattcaatatggtggtagtgttaaacctaacaacattaaagaatacatggcacaaactgatattgatggggcattagtaggtggcgcagcgtttaaagacgtgccagcctatgatttaggtgcgactttaatagaacatattattaaagagacgggtttgaatccaagtgagattgatgaagttatcatcggtaacgtactacaagcaggacaaggacaaaatccagcacgaattgctgctatgaaaggtggcttgccagaaacagtacctgcatttacggtgaataaagtatgtggttctgggttaaagtcgattcaattagcatatcaatctattgtgactggtgaaaatgacatcgtgctagctggcggtatggagaatatgtctcaatcaccaatgcttgtcaacaacagtcgctttggttttaaaatgggacatcaatcaatggttgatagcatggtatatgatggtttaacagatgtatttaatcaatatcatatgggtattactgctgaaaatttagtagagcaatatggtatttcaagagaagaacaagatacatttgctgtaaactcacaacaaaaagcagtacgtgcacagcaa
ttattaatccaacaagctaaatcgaacagtgacacaacgccggcaatgccattggatacttgtggtgcaatgtcacagggtatgataggctattggttggaaactgaaatcaatcgcattttaactgaaatgaatagtgatagaactgtaggcacaatcgttacacgtgtggaagtagataaagatgatccacgattcaataacccaaccaaaccaattggtcctttttatacgaaagaagaagttgaagaattacaaaaagaacagccagactcagtctttaaagaagatgcaggacgtggttatagaaaagtagttgcgtcaccactacctcaatctatactagaacaccagttaattcgaactttagcagacggtaaaaatattgtcattgcatgcggtggtggcggtattccagttataaaaaaagaaaatacctatgaaggtgttgaagcgaattttaattctttaggattagatgatacttatgaagctttaaatattccaattgaagattttcatttaattaaagaaattatttcgaaaaaagaattagatggctttaatatcacaattcctcataaagaacgtatcataccgtatttagattatgttgatgaacaagcgattaatgcaggtgcagttaacactgttttgataaaagatggcaagtggatagggtataatacagatggtattggttatgttaaaggattgcacagcgtttatccagatttagaaaatgcatacattttaattttgggcgcaggtggtgcaagtaaaggtattgcttatgaattagcaaaatttgtaaagcccaaattaactgttgcgaatagaacgatggctcgttttgaatcttggaatttaaatataaaccaaatttcattggcagatgctgaaaagtatttaggtgctgattggattgtcatcacagctggatggggattagcggttacaatgggtgtgtttgctgtcggtcaattctcaggtgcacatttaaacccagcggtgtctttagctcttgcattagacggaagttttgattggtcattagttcctggttatattgttgctcaaatgttaggtgcaattgtcggagcaacaattgtatggttaatgtacttgccacattggaaagcgacagaagaagctggcgcgaaattaggtgttttctctacagcaccggctattaagaattactttgccaactttttaagtgagattatcggaacaatggcattaactttaggtattttatttatcggtgtaaacaaaattgccgatggtttaaatcctttaattgtcggagcattaattgttgcaatcggattaagtttaggcggtgctactggttatgcaatcaacccagcacgtcgaatatttgaagatccaagtacatcatataagtattctatttcaatgacaacacgtcaaatgcgtgaaggtgaagttgatggcgtagattacttttttaaaactagggatgcgtttgaagctttaattaaagatgaccaatttatagaatatgctgaatatgtaggcaactattatggtacaccagttcaatatgttaaagatacaatggacgaaggtcatgatgtatttttagaaattgaagtagaaggtgcaaagcaagttagaaagaaatttccagatgcgttatttattttcttagcacctccaagtttagatcacttgagagagcgattagtaggtagaggaacagaatccaatgagaaaatacaaagtcgtattaacgaagcgcgtaaagaagttgaaatgatgaatttatacgattacgttgcaacacaattacaagcaacagattatgttacaccaatcgtgttaggtgatgagactaaggttcaatctttagcgcaaaaacttgatcttgatatttctaatattgaattaattaatcctgcgacaagtgaattgaaagctgaattagttcaatcatttgttgaacgacgtaaaggtaaagcgactgaagaacaagcacaagaattattaaacaatgtgaactacttcggtacaatgcttgtttatgctggtaaagcagatggtttagttagtggtgcagcacattcaacaggagacactgtgcgtccagctttacaaatcatcaaaacgaaaccaggtgtatcaagaacatcaggtatcttctttatgattaaaggtgatgaacaatacatctttggtgattgtgcaatcaatccagaacttgattcacaaggacttgcagaaattgcagtagaaagtgcaaaatcagcattacacgaaacagatgaaaaaattaacaaaaaagcgcacgctattttcaaacatggaatgactccaattatttgtgttggtgaaacagacgaagagcgtgaaagtggtaaagctaacgatgttgtaggtgagcaagttaagaaagctgttgcaggtttatctgaagatcaacttaaatcagttgtaattgcttatgagccaatctgggcaatcggaactggtaaatcatcaacatctgaagatgcaaatgaaatgtgtgcatttgtacgtcaaactattgctgacttatcaagcaaagaagtatcagaagcaactcgtattcaatatggtggtagtgttaaacctaacaacattaaagaatacatggcacaaactgatattgatggggcattagtaggtggcgcagcgtttaaagacgtgccagcctatgatttaggtgcgactttaatagaacatattattaaagagacgggtttgaatccaagtgagattgatgaagttatcatcggtaacgtactacaagcaggacaaggacaaaatccagcacgaattgctgctatgaaaggtggcttgccagaaacagtacctgcatttacagtgaataaagtatgtggttctgggttaaagtcgattcaattagcatatcaatctattgtgactggtgaaaatgacatcgtgctagctggcggtatggagaatatgtctcagtcaccaatgcttgtcaacaacagtcgcttcggttttaaaatgggacatcaatcaatggttgatagcatggtatatgatggtttaacagatgtatttaatcaatatcatatgggtattactgctgaaaatttagtagagcaatatggtatttcaagagaagaacaagatacatttgctgtaaactcacaacataaagcagtacgtgcacagcaa
ttattaatccaacaagctaaatcgaacagtgacacaacgccggcaatgccattggatacttgtggtgcaatgtcacagggtatgataggctattggttggaaactgaaatcaatcgcattttaactgaaatgaatagtgatagaactgtaggcacaatcgttacacgtgtggaagtagataaagatgatccacgattcaataacccaaccaaaccaattggtcctttttatacgaaagaagaagttgaagaattacaaaaagaacagccagactcagtctttaaagaagatgcaggacgtggttatagaaaagttgttgcgtcaccactacctcaatctatactagaacaccagttaattcgaactttagcagacggtaaaaatattgtcattgcatgcggtggtggcggtattccagttataaaaaaagaaaatacctatgaaggtgttgaagcgaattttaattctttaggattagatgatacttatgaagctttaaatattccaattgaagattttcatttaattaaagaaattatttcgaaaaaagaattagatggctttaatatcacaattcctcataaagagcgtatcataccgtatttagatcatgttgatgaacaagcgattaatgcaggtgcagttaacactgttttgataaaagatggcaagtggatagggtataatacagatggtattggttatgttaaaggattgcacagcgtttatccagatttagaaaatgcatacattttaattttgggcgcaggtggtgcaagtaaaggtattgcttatgaattagcaaaatttgtaaagcccaaattaactgttgcgaatagaacgatggctcgttttgaatcttggaatttaaatataaaccaaatttcaatagcagatgctgaaaagtatttaggtgctgattggattgtcatcacagctggatggggattagcggttacaatgggtgtgtttgctgtcggtcaattctcaggtgcacatttaaacccagcggtgtctttagctcttgcattagacggaagttttgattggtcattagttcctggttatattgttgctcaaatgttaggtgcaattgtcggagcaacaattgtatggttaatgtacttgccacattggaaagcgacagaagaagctggcgcgaaattaggtgttttctctacagcaccggctattaagaattactttgccaactttttaagtgagattatcggaacaatggcattaactttaggtattttatttatcggtgtaaacaaaattgccgatggtttaaatcctttaattgtcggagcattaattgttgcaatcggattaagtttaggcggtgctactggttatgcaatcaacccagcacgtcgaatatttgaagatccaagtacatcatataagtattctatttcaatgacaacacgtcaaatgcgtgaaggtgaagttgatggcgtagattacttttttaaaactagggatgcgtttgaagctttaatcaaagatgaccaatttatagaatatgctgaatatgtaggcaactattatggtacaccagttcaatatgttaaagatacaatggacgaaggtcatgatgtatttttagaaattgaagtagaaggtgcaaagcaagttagaaagaaatttccagatgcattatttattttcttagcacctccaagtttagatcacttgagagagcgattagtaggtagaggaacagaatccgatgagaaaatacaaagtcgtattaacgaagcacgtaaagaagtcgaaatgatgaatttatacgattacgttgcaacacaattacaagcaacagattatgttacaccaatcgtgttaggtgatgagactaaggttcaatctttagcgcaaaaacttaatcttgatatttctaatattgaattaattaatcctgcgacaagtgaatttaaagctgaattagtccaatcatttgttgaacgacgtaaaggtaaagcgactgaagaacaagcgcaagaattattaaacaatgtgaactacttcggtacaatgcttgtttatgctggtaaagcagatggtttagttagtggtgcagcacattcaacaggagacactgtgcgtccagctttacaaatcatcaaaacgaaaccaggtgtatcaagaacatcaggtatcttctttatgattaaaggtgatgaacaatacatctttggtgattgtgcaatcaatccagaacttgattcacaaggacttgcagaaattgcagtagaaagtgcaaaatcagcattacacgaaacagataaagaaattaacaaaaaagcgcacgctattttcaaacatggaatgactccaattatatgtgttggtgaaacagacgaagagcgtgaaagtggtaaagctaacgatgttgtaggtgagcaagttaagaaagctgttgcaggtttatctgaaaatcaactaaaatcagttgtaattgcttatgaaccaatctgggcaatcggaactggtaaatcatcaacatctgaagatgcgaatgaaatgtgtgcatttgtacgtcaaactattgctgacttatcaagcaaagaagtatcagaagcaactcgtattcaatatggtggtagtgttaaacctaacaacattaaagaatacatggcacaaactgatattgatggggcattagtaggtggcgcagcgtttaaagacgtgccagcctatgatttaggtgcgactttaatagaacatattattaaagagacgggtttgaatccaagtgagattgatgaagttatcatcggtaacgtactacaagcaggacaaggacaaaatccagcacgaattgctgctatgaaaggtggcttaccagagacagtacctgcatttacagtgaataaagtatgtggttctgggttaaagtcgattcaattagcatatcaatctattgtgactggtgaaaatgacatcgtgctagctggcggtatggagaatatgtctcaatcaccaatgcttgtcaacaacagtcgctttggttttaaaatgggacatcaatcaatggttgatagcatggtatatgatggtttaacagatgtatttaatcaatatcatatgggtattactgctgaaaatttagtagagcaatatggtatttcaagagaagaacaagatacatttgctgtaaactcacaacaaaaagcagtacgtgcacagcaa
ttattaatccaacaagctaaatcgaacagtgacacaacgccggcaatgccattggatacttgtggtgcaatgtcacagggtatgataggctattggttggaaactgaaatcaatcgcattttaactgaaatgaatagtgatagaactgtaggcacaatcgttacacgtgtggaagtagataaagatgatccacgattcaataacccaaccaaaccaattggtcctttttatacgaaagaagaagttgaagaattacaaaaagaacagccagactcagtctttaaagaagatgcaggacgtggttatagaaaagtagttgcgtcaccactacctcaatctatactagaacaccagttaattcgaactttagcagacggtaaaaatattgtcattgcatgcggtggtggcggtattccagttataaaaaaagaaaatacctatgaaggtgttgaagcgaattttaattctttaggattagatgatacttatgaagctttaaatattccaattgaagattttcatttaattaaagaaattatttcgaaaaaagaattagatggctttaatatcacaattcctcataaagaacgtatcataccgtatttagattatgttgatgaacaagcgattaatgcaggtgcagttaacactgttttgataaaagatggcaagtggatagggtataatacagatggtattggttatgttaaaggattgcacagcgtttatccagatttagaaaatgcatacattttaattttgggcgcaggtggtgcaagtaaaggtattgcttatgaattagcaaaatttgtaaagcccaaattaactgttgcgaatagaacgatggctcgttttgaatcttggaatttaaatataaaccaaatttcattggcagatgctgaaaagtatttaggtgctgattggattgtcatcacagctggatggggattagcggttacaatgggtgtgtttgctgtcggtcaattctcaggtgcacatttaaacccagcggtgtctttagctcttgcattagacggaagttttgattggtcattagttcctggttatattgttgctcaaatgttaggtgcaattgtcggagcaacaattgtatggttaatgtacttgccacattggaaagcgacagaagaagctggcgcgaaattaggtgttttctctacagcaccggctattaagaattactttgccaactttttaagtgagattatcggaacaatggcattaactttaggtattttatttatcggtgtaaacaaaattgccgatggtttaaatcctttaattgtcggagcattaattgttgcaatcggattaagtttaggcggtgctactggttatgcaatcaacccagcacgtcgaatatttgaagatccaagtacatcatataagtattctatttcaatgacaacacgtcaaatgcgtgaaggtgaagttgatggcgtagattacttttttaaaactagggatgcgtttgaagctttaatcaaagatgaccaatttatagaatatgctgaatatgtaggcaactattatggtacaccagttcaatatgttaaagatacaatggacgaaggtcatgatgtatttttagaaattgaagtagaaggtgcaaagcaagttagaaagaaatttccagatgcgctatttattttcttagcacctccaagtttagaacacttgagagagcgattagtaggtagaggaacagaatctgatgagaaaatacaaagtcgtattaacgaagcgcgtaaagaagttgaaatgatgaatttatacgattacgttgcaacacaattacaagcaacagattatgttacaccaatcgtgttaggtgatgagactaaggttcaatctttagcgcaaaaacttgatcttgatatttctaatattgaattaattaatcctgcgacaagtgaattgaaagctgaattagttcaatcatttgttgaacgacgtaaaggtaaagcgactgaagaacaagcacaagaattattaaacaatgtgaactacttcggtacaatgcttgtttatgctggtaaagcagatggtttagttagtggtgcagcacattcaacaggagacactgtgcgtccagctttacaaatcatcaaaacgaaaccaggtgtatcaagaacatcaggtatcttctttatgattaaaggtgatgaacaatacatctttggtgattgtgcaatcaatccagaacttgattcacaaggacttgcagaaattgcagtagaaagtgcaaaatcagcattacacgaaacagatgaagaaattaacaaaaaagcgcacgctattttcaaacatggaatgactccaattatttgtgttggtgaaacagacgaagagcgtgaaagtggtaaagctaacgatgttgtaggtgagcaagttaagaaagctgttgcaggtttatctgaagatcaacttaaatcagttgtaattgcttatgagccaatctgggcaatcggaactggtaaatcatcaacatctgaagatgcaaatgaaatgtgtgcatttgtacgtcaaactattgctgacttatcaagcaaagaagtatcagaagcaactcgtattcaatatggtggtagtgttaaacctaacaacattaaagaatacatggcacaaactgatattgatggggcattagtaggtggcgcagcgtttaaagacgtgccagcctatgatttaggtgcgactttaatagaacatattattaaagagacgggtttgaatccaagtgagattgatgaagttatcatcggtaacgtactacaagcaggacaaggacaaaatccagcacgaattgctgctatgaaaggtggcttgccagaaacagtacctgcatttacagtgaataaagtatgtggttctgggttaaagtcgattcaattagcatatcaatctattgtgactggtgaaaatgacatcgtgctagctggcggtatggagaatatgtctcagtcaccaatgcttgtcaacaacagtcgcttcggttttaaaatgggacatcaatcaatggttgatagcatggtatatgatggtttaacagatgtatttaatcaatatcatatgggtattactgctgaaaatttagtagagcaatatggtatttcaagagaagaacaagatacatttgctgtaaactcacaacataaagcagtacgtgcacagcaa
ttattaatccaacaagctaaatcgaacagtgacacaacgccggcaatgccattggatacttgtggtgcaatgtcacagggtatgataggctattggttggaaactgaaatcaatcgcattttaactgaaatgaatagtgatagaactgtaggcacaatcgttacacgtgtggaagtagataaagatgatccacgattcaataacccaaccaaaccaattggtcctttttatacgaaagaagaagttgaagaattacaaaaagaacagccagactcagtctttaaagaagatgcaggacgtggttatagaaaagtagttgcgtcaccactacctcaatctatactagaacaccagttaattcgaactttagcagacggtaaaaatattgtcattgcatgcggtggtggcggtattccagttataaaaaaagaaaatacctatgaaggtgttgaagcgaattttaattctttaggattagatgatacttatgaagctttaaatattccaattgaagattttcatttaattaaagaaattatttcgaaaaaagaattagatggctttaatatcacaattcctcataaagaacgtatcataccgtatttagattatgttgatgaacaagcgattaatgcaggtgcagttaacactgttttgataaaagatggcaagtggatagggtataatacagatggtattggttatgttaaaggattgcacagcgtttatccagatttagaaaatgcatacattttaattttgggcgcaggtggtgcaagtaaaggtattgcttatgaattagcaaaatttgtaaagcccaaattaactgttgcgaatagaacgatggctcgttttgaatcttggaatttaaatataaaccaaatttcattggcagatgctgaaaagtatttaggtgctgattggattgtcatcacagctggatggggattagcggttacaatgggtgtgtttgctgtcggtcaattctcaggtgcacatttaaacccagcggtgtctttagctcttgcattagacggaagttttgattggtcattagttcctggttatattgttgctcaaatgttaggtgcaattgtcggagcaacaattgtatggttaatgtacttgccacattggaaagcgacagaagaagctggcgcgaaattaggtgttttctctacagcaccggctattaagaattactttgccaactttttaagtgagattatcggaacaatggcattaactttaggtattttatttatcggtgtaaacaaaattgccgatggtttaaatcctttaattgtcggagcattaattgttgcaatcggattaagtttaggcggtgctactggttatgcaatcaacccagcacgtcgaatatttgaagatccaagtacatcatataagtattctatttcaatgacaacacgtcaaatgcgtgaaggtgaagttgatggcgtagattacttttttaaaactagggatgcgtttgaagctttaattaaagatgaccaatttatagaatatgctgaatatgtaggcaactattatggtacaccagttcaatatgttaaagatacaatggacgaaggtcatgatgtatttttagaaattgaagtagaaggtgcaaagcaagttagaaagaaatttccagatgcgttatttattttcttagcacctccaagtttagatcacttgagagagcgattagtaggtagaggaacagaatccaatgagaaaatacaaagtcgtattaacgaagcgcgtaaagaagttgaaatgatgaatttatacgattacgttgcaacacaattacaagcaacagattatgttacaccaatcgtgttaggtgatgagactaaggttcaatctttagcgcaaaaacttgatcttgatatttctaatattgaattaattaatcctgcgacaagtgaattgaaagctgaattagttcaatcatttgttgaacgacgtaaaggtaaagcgactgaagaacaagcacaagaattattaaacaatgtgaactacttcggtacaatgcttgtttatgctggtaaagcagatggtttagttagtggtgcagcacattcaacaggagacactgtgcgtccagctttacaaatcatcaaaacgaaaccaggtgtatcaagaacatcaggtatcttctttatgattaaaggtgatgaacaatacatctttggtgattgtgcaatcaatccagaacttgattcacaaggacttgcagaaattgcagtagaaagtgcaaaatcagcattacacgaaacagatgaagaaattaacaaaaaagcgcacgctattttcaaacatggaatgactccaattatttgtgttggtgaaacagacgaagagcgtgaaagtggtaaagctaacgatgttgtaggtgagcaagttaagaaagctgttgcaggcttatctgaagatcaacttaaatcagttgtaattgcttatgagccaatctgggcaatcggaactggtaaatcatcaacatctgaagatgcaaatgaaatgtgtgcatttgtacgtcaaactattgctgacttatcaagcaaagaagtatcagaagcaactcgtattcaatatggtggtagtgttaaacctaacaacattaaagaatacatggcacaaactgatattgatggggcattagtaggtggcgcagcgtttaaagacgtgccagcctatgatttaggtgcgactttaatagaacatattattaaagagacgggtttgaatccaagtgagattgatgaagttatcatcggtaacgtactacaagcaggacaaggacaaaatccagcacgaattgctgctatgaaaggtggcttgccagaaacagtacctgcatttacagtgaataaagtatgtggttctgggttaaagtcgattcaattagcatatcaatctattgtgactggtgaaaatgacatcgtgctagctggcggtatggagaatatgtctcagtcaccaatgcttgtcaacaacagtcgcttcggttttaaaatgggacatcaatcaatggttgatagcatggtatatgatggtttaacagatgtatttaatcaatatcatatgggtattactgctgaaaatttagtagagcaatatggtatttcaagagaagaacaagatacatttgctgtaaactcacaacataaagcagtacgtgcacagcaa
ttattaatccaacaagctaaatcgaacagtgacacaacgccggcaatgccattggatacttgtggtgcaatgtcacagggtatgataggctattggttggaaactgaaatcaatcgcattttaactgaaatgaatagtgatagaactgtaggcacaatcgttacacgtgtggaagtagataaagatgatccacgattcaataacccaaccaaaccaattggtcctttttatacgaaagaagaagttgaagaattacaaaaagaacagccagactcagtctttaaagaagatgcaggacgtggttatagaaaagtagttgcgtcaccactacctcaatctatactagaacaccagttaattcgaactttagcagacggtaaaaatattgtcattgcatgcggtggtggcggtattccagttataaaaaaagaaaatacctatgaaggtgttgaagcgaattttaattctttaggattagatgatacttatgaagctttaaatattccaattgaagattttcatttaattaaagaaattatttcgaaaaaagaattagatggctttaatatcacaattcctcataaagaacgtatcataccgtatttagattatgttgatgaacaagcgattaatgcaggtgcagttaacactgttttgataaaagatggcaagtggatagggtataatacagatggtattggttatgttaaaggattgcacagcgtttatccagatttagaaaatgcatacattttaattttgggcgcaggtggtgcaagtaaaggtattgcttatgaattagcaaaatttgtaaagcccaaattaactgttgcgaatagaacgatggctcgttttgaatcttggaatttaaatataaaccaaatttcattggcagatgctgaaaagtatttaggtgctgattggattgtcatcacagctggatggggattagcggttacaatgggtgtgtttgctgtcggtcaattctcaggtgcacatttaaacccagcggtgtctttagctcttgcattagacggaagttttgattggtcattagttcctggttatattgttgctcaaatgttaggtgcaattgtcggagcaacaattgtatggttaatgtacttgccacattggaaagcgacagaagaagctggcgcgaaattaggtgttttctctacagcaccggctattaagaattactttgccaactttttaagtgagattatcggaacaatggcattaactttaggtattttatttatcggtgtaaacaaaattgccgatggtttaaatcctttaattgtcggagcattaattgttgcaatcggattaagtttaggcggtgctactggttatgcaatcaacccagcacgtcgaatatttgaagatccaagtacatcatataagtattctatttcaatgacaacacgtcaaatgcgtgaaggtgaagttgatggcgtagattacttttttaaaactagggatgcgtttgaagctttaattaaagatgaccaatttatagaatatgctgaatatgtaggcaactattatggtacaccagttcaatatgttaaagatacaatggacgaaggtcatgatgtatttttagaaattgaagtagaaggtgcaaagcaagttagaaagaaatttccagatgcgttatttattttcttagcacctccaagtttagatcacttgagagagcgattagtaggtagaggaacagaatccaatgagaaaatacaaagtcgtattaacgaagcgcgtaaagaagttgaaatgatgaatttatacgattacgttgcaacacaattacaagcaacagattatgttacaccaatcgtgttaggtgatgagactaaggttcaatctttagcgcaaaaacttgatcttgatatttctaatattgaattaattaatcctgcgacaagtgaattgaaagctgaattagttcaatcatttgttgaacgacgtaaaggtaaagcgactgaagaacaagcacaagaattattaaacaatgtgaactacttcggtacaatgcttgtttatgctggtaaagcagatggtttagttagtggtgcagcacattcaacaggagacactgtgcgtccagctttacaaatcatcaaaacgaaaccaggtgtatcaagaacatcaggtatcttctttatgattaaaggtgatgaacaatacatctttggtgattgtgcaatcaatccagaacttgattcacaaggacttgcagaaattgcagtagaaagtgcaaaatcagcattacacgaaacagatgaagaaattaacaaaaaagcgcacgctattttcaaacatggaatgactccaattatttgtgttggtgaaacagaagaagagcgtgaaagtggtaaagctaacgatgttgtaggtgagcaagttaagaaagctgttgcaggtttatctgaagatcaacttaaatcagttgtaattgcttatgagccaatctgggcaatcggaactggtaaatcatcaacatctgaagatgcaaatgaaatgtgtgcatttgtacgtcaaactattgctgacttatcaagcaaagaagtatcagaagcaactcgtattcaatatggtggtagtgttaaacctaacaacattaaagaatacatggcacaaactgatattgatggggcattagtaggtggcgcagcgtttaaagacgtgccagcctatgatttaggtgcgactttaatagaacatattattaaagagacgggtttgaatccaagtgagattgatgaagttatcatcggtaacgtactacaagcaggacaaggacaaaatccagcacgaattgctgctatgaaaggtggcttgccagaaacagtacctgcatttacagtgaataaagtatgtggttctgggttaaagtcgattcaattagcatatcaatctattgtgactggtgaaaatgacatcgtgctagctggcggtatggagaatatgtctcagtcaccaatgcttgtcaacaacagtcgcttcggttttaaaatgggacatcaatcaatggttgatagcatggtatatgatggtttaacagatgtatttaatcaatatcatatgggtattactgctgaaaatttagtagagcaatatggtatttcaagagaagaacaagatacatttgctgtaaactcacaacataaagcagtatgtgcacagcaa
ttattaatccaacaagctaaatcgaacagtgacacaacgccggcaatgccattggatacttgtggtgcaatgtcacagggtatgataggctattggttggaaactgaaatcaatcgcattttaactgaaatgaatagtgatagaactgtaggcacaatcgttacacgtgtggaagtagataaagatgatccacgattcaataacccaaccaaaccaattggtcctttttatacgaaagaagaagttgaagaattacaaaaagaacagccagactcagtctttaaagaagatgcaggacgtgattatagaaaagtagttgcgtcaccactacctcaatctatactagaacaccagttaattcgaactttagcagacggtaaaaatattgtcattgcatgcggtggtggcggtattccagttataaaaaaagaaaatacctatgaaggtgttgaagcgaattttaattctttaggattagatgatacttatgaagctttaaatattccaattgaagattttcatttaattaaagaaattatttcgaaaaaagaattagatggctttaatatcacaattcctcataaagaacgtatcataccgtatttagattatgttgatgaacaagcgattaatgcaggtgcagttaacactgttttgataaaagatggcaagtggatagggtataatacagatggtattggttatgttaaaggattgcacagcgtttatccagatttagaaaatgcatacattttaattttgggcgcaggtggtgcaagtaaaggtattgcttatgaattagcaaaatttgtaaagcccaaattaactgttgcgaatagaacgatggctcgttttgaatcttggaatttaaatataaaccaaatttcattggcagatgctgaaaagtatttaggtgctgattggattgtcatcacagctggatggggattagcggttacaatgggtgtgtttgctgtcggtcaattctcaggtgcacatttaaacccagcggtgtctttagctcttgcattagacggaagttttgattggtcattagttcctggttatattgttgctcaaatgttaggtgcaattgtcggagcaacaattgtatggttaatgtacttgccacattggaaagcgacagaagaagctggcgcgaaattaggtgttttctctacagcaccggctattaagaattactttgccaactttttaagtgagattatcggaacaatggcattaactttaggtattttatttatcggtgtaaacaaaattgccgatggtttaaatcctttaattgtcggagcattaattgttgcaatcggattaagtttaggcggtgctactggttatgcaatcaacccagcacgtcgaatatttgaagatccaagtacatcatataagtattctatttcaatgacaacacgtcaaatgcgtgaaggtgaagttgatggcgtagattacttttttaaaactagggatgcgtttgaagctttaattaaagatgaccaatttatagaatatgctgaatatgtaggcaactattatggtacaccagttcaatatgttaaagatacaatggacgaaggtcatgatgtatttttagaaattgaagtagaaggtgcaaagcaagttagaaagaaatttccagatgcgttatttattttcttagcacctccaagtttagatcacttgagagagcgattagtaggtagaggaacagaatccaatgagaaaatacaaagtcgtattaacgaagcgcgtaaagaagttgaaatgatgaatttatacgattacgttgcaacacaattacaagcaacagattatgttacaccaatcgtgttaggtgatgagactaaggttcaatctttagcgcaaaaacttgatcttgatatttctaatattgaattaattaatcctgcgacaagtgaattgaaagctgaattagttcaatcatttgttgaacgacgtaaaggtaaagcgactgaagaacaagcacaagaattattaaacaatgtgaactacttcggtacaatgcttgtttatgctggtaaagcagatggtttagttagtggtgcagcacattcaacaggagacactgtgcgtccagctttacaaatcatcaaaacgaaaccaggtgtatcaagaacatcaggtatcttctttatgattaaaggtgatgaacaatacatctttggtgattgtgcaatcaatccagaacttgattcacaaggacttgcagaaattgcagtagaaagtgcaaaatcagcattacacgaaacagatgaagaaattaacaaaaaagcgcacgctattttcaaacatggaatgactccaattatttgtgttggtgaaacagacgaagagcgtgaaagtggtaaagctaacgatgttgtaggtgagcaagttaagaaagctgttgcaggtttatctgaagatcaacttaaatcagttgtaattgcttatgagccaatctgggcaatcggaactggtaaatcatcaacatctgaagatgcaaatgaaatgtgtgcatttgtacgtcaaactattgctgacttatcaagcaaagaagtatcagaagcaactcgtattcaatatggtggtagtgttaaacctaacaacattaaagaatacatggcacaaactgatattgatggggcattagtaggtggcgcagcgtttaaagacgtgccagcctatgatttaggtgcgactttaatagaacatattattaaagagacgggtttgaatccaagtgagattgatgaagttatcatcggtaacgtactacaagcaggacaaggacaaaatccagcacgaattgctgctatgaaaggtggcttgccagaaaaagtacctgcatttacagtgaataaagtatgtggttctgggttaaagtcgattcaattagcatatcaatctattgtgactggtgaaaatgacatcgtgctagctggcggtatggagaatatgtctcagtcaccaatgcttgtcaacaacagtcgcttcggttttaaaatgggacatcaatcaatggttgatagcatggtatatgatggtttaacagatgtatttaatcaatatcatatgggtattactgctgaaaatttagtagagcaatatggtatttcaagagaagaacaagatacatttgctgtaaactcacaacataaagcagtacgtgcacagcaa
ttattaatccaacaagctaaatcgaacagtgacacaacgccggcaatgccattggatacttgtggtgcaatgtcacagggtatgataggctattggttggaaactgaaatcaatcgcattttaactgaaatgaatagtgatagaactgtaggcacaatcgttacacgtgtggaagtagataaagatgatccacgattcaataacccaaccaaaccaattggtcctttttatacgaaagaagaagttgaagaattacaaaaagaacagccagactcagtctttaaagaagatgcaggacgtggttatagaaaagtagttgcgtcaccactacctcaatctatactagaacaccagttaattcgaactttagcagacggtaaaaatattgtcattgcatgcggtggtggcggtattccagttataaaaaaagaaaatacctatgaaggtgttgaagcgaattttaattctttaggattagatgatacttatgaagctttaaatattccaattgaagattttcatttaattaaagaaattatttcgaaaaaagaattagatggctttaatatcacaattcctcataaagaacgtatcataccgtatttagattatgttgatgaacaagcgattaatgcaggtgcagttaacactgttttgataaaagatggcaagtggatagggtataatacagatggtattggttatgttaaaggattgcacagcgtttatccagatttagaaaatgcatacattttaattttgggcgcaggtggtgcaagtaaaggtattgcttatgaattagcaaaatttgtaaagcccaaattaactgttgcgaatagaacgatggctcgttttgaatcttggaatttaaatataaaccaaatttcattggcagatgctgaaaagtatttaggtgctgattggattgtcatcacagctggatggggattagcggttacaatgggtgtgtttgctgtcggtcaattctcaggtgcacatttaaacccagcggtgtctttagctcttgcattagacggaagttttgattggtcattagttcctggttatattgttgctcaaatgttaggtgcaattgtcggagcaacaattgtatggttaatgtacttgccacattggaaagcgacagaagaagctggcgcgaaattaggtgttttctctacagcaccggctattaagaattactttgccaactttttaagtgagattatcggaacaatggcattaactttaggtattttatttatcggtgtaaacaaaattgccgatggtttaaatcctttaattgtcggagcattaattgttgcaatcggattaagtttaggcggtgctactggttatgcaatcaacccagcacgtcgaatatttgaagatccaagtacatcatataagtattctatttcaatgacaacacgtcaaatgcgtgaaggtgaagttgatggcgtagattacttttttaaaactagggatgcgtttgaagctttaattaaagatgaccaatttatagaatatgctgaatatgtaggcaactattatggtacaccagttcaatatgttaaagatacaatggacgaaggtcatgatgtatttttagaaattgaagtagaaggtgcaaagcaagttagaaagaaatttccagatgcgttatttattttcttagcacctccaagtttagatcacttgagagagcgattagtaggtagaggaacagaatccaatgagaaaatacaaagtcgtattaacgaagcgcgtaaagaagttgaaatgatgaatttatacgattacgttgcaacacaattacaagcaacagattatgttacaccaatcgtgttaggtgatgagactaaggttcaatctttagcgcaaaaacttgatcttgatatttctaatattgaattaattaatcctgcgacaagtgaattgaaagctgaattagttcaatcatttgttgaacgacgtaaaggtaaagcgactgaagaacaagcacaagaattattaaacaatgtgaactacttcggtacaatgcttgtttatgctggtaaagcagatggtttagttagtggtgcagcacattcaacaggagacactgtgcgtccagctttacaaatcatcaaaacgaaaccaggtgtatcaagaacatcaggtatcttctttatgattaaaggtgatgaacaatacatctttggtgattgtgcaatcaatccagaacttgattcacaaggacttgcagaaattgcagtagaaagtgcaaaatcagcattacacgaaacagatgaagaaattaacaaaaaagcgcacgctattttcaaacatggaatgactccaattatttgtgttggtgaaacagacgaagagcgtgaaagtggtaaagctaacgatgttgtaggtgagcaagttaagaaagctgttgcaggtttatctgaagatcaacttaaatcagttgtaattgcttatgagccaatctgggcaatcggaactggtaaatcatcaacatctgaagatgcaaatgaaatgtgtgcatttgtacgtcaaactattgctgacttatcaagcaaagaagtatcagaagcaactcgtattcaatatggtggtagtgttaaacctaacaacattaaagaatacatggcacaaactgatattgatggggcattagtaggtggcgcagcgtttaaagacgtgccagcctatgatttaggtgcgactttaatagaacatattattaaagagacgggtttgaatccaagtgagattgatgaagttatcatcggtaacgtactacaagcaggacaaggacaaaatccagcacgaattgctgctatgaaaggtggcttgccagaaacagtacctgcatttacagtgaataaagtatgtggttctgggttaaagtcgattcaattagcatatcaatctattgtgactggtgaaaatgacatcgtgctagctggcggtatggagaatatgtctcagtcaccaatgcttgtcaacaacagtcgcttcggttttaaaatgggacatcaatcaatggttgatagcatggtatatgatggtttaacagatgtatttaatcaatatcatatgggtattactgctgaaaatttagtagagcaatatggtatttcaagagaagaacaagatacatttgctgtaaactcacaacataaagcagtacgtgcacagcaa
ttattaatccaacaagctaaatcgaacagtgacacaacgccggcaatgccattggatacttgtggtgcaatgtcacagggtatgataggctattggttggaaactgaaatcaatcgcattttaactgaaatgaatagtgatagaactgtaggcacaatcgttacacgtgtggaagtagataaagatgatccacgattcaataacccaaccaaaccaattggtcctttttatacgaaagaagaagttgaagaattacaaaaagaacagccagactcagtctttaaagaagatgcaggacgtggttatagaaaagtagttgcgtcaccactacctcaatctatactagaacaccagttaattcgaactttagcagacggtaaaaatattgtcattgcatgcggtggtggcggtattccagttataaaaaaagaaaatacctatgaaggtgttgaagcgaattttaattctttaggattagatgatacttatgaagctttaaatattccaattgaagattttcatttaattaaagaaattatttcgaaaaaagaattagatggctttaatatcacaattcctcataaagaacgtatcataccgtatttagattatgttgatgaacaagcgattaatgcaggtgcagttaacactgttttgataaaagatggcaagtggatagggtataatacagatggtattggttatgttaaaggattgcacagcgtttatccagatttagaaaatgcatacattttaattttgggcgcaggtggtgcaagtaaaggtattgcttatgaattagcaaaatttgtaaagcccaaattaactgttgcgaatagaacgatggctcgttttgaatcttggaatttaaatataaaccaaatttcattggcagatgctgaaaagtatttaggtgctgattggattgtcatcacagctggatggggattagcggttacaatgggtgtgtttgctgtcggtcaattctcaggtgcacatttaaacccagcggtgtctttagctcttgcattagacggaagttttgattggtcattagttcctggttatattgttgctcaaatgttaggtgcaattgtcggagcaacaattgtatggttaatgtacttgccacattggaaagcgacagaagaagctggcgcgaaattaggtgttttctctacagcaccggctattaagaattactttgccaactttttaagtgagattatcggaacaatggcattaactttaggtattttatttatcggtgtaaacaaaattgccgatggtttaaatcctttaattgtcggagcattaattgttgcaatcggattaagtttaggcggtgctactggttatgcaatcaacccagcacgtcgaatatttgaagatccaagtacatcatataagtattctatttcaatgacaacacgtcaaatgcgtgaaggtgaagttgatggcgtagattacttttttaaaactagggatgcgtttgaagctttaattaaagatgaccaatttatagaatatgctgaatatgtaggcaactattatggtacaccagttcaatatgttaaagatacaatggacgaaggtcatgatgtatttttagaaattgaagtagaaggtgcaaagcaagttagaaagaaatttccagatgcgttatttattttcttagcacctccaagtttagatcacttgagagagcgattagtaggtagaggaacagaatccaatgagaaaatacaaagtcgtattaacgaagcgcgtaaagaagttgaaatgatgaatttatacgattacgttgcaacacaattacaagcaacagattatgttacaccaatcgtgttaggtgatgagactaaggttcaatctttagcgcaaaaacttgatcttgatatttctaatattgaattaattaatcctgcgacaagtgaattgaaagctgaattagttcaatcatttgttgaacgacgtaaaggtaaagcgactgaagaacaagcacaagaattattaaacaatgtgaactacttcggtacaatgcttgtttatgctggtaaagcagatggtttagttagtggtgcagcacattcaacaggagacactgtgcgtccagctttacaaatcatcaaaacgaaaccaggtgtatcaagaacatcaggtatcttctttatgattaaaggtgatgaacaatacatctttggtgattgtgcaatcaatccagaacttgattcacaaggacttgcagaaattgcagtagaaagtgcaaaatcagcattacacgaaacagatgaagaaattaacaaaaaagcgcacgctattttcaaacatggaatgactccaattatttgtgttggtgaaacagacgaagagcgtgaaagtggtaaagctaacgatgttgtaggtgagcaagttaagaaagctgttgcaggtttatctgaagatcaacttaaatcagttgtaattgcttatgagccaatctgggcaatcggaactggtaaatcatcaacatctgaagatgcaaatgaaatgtgtgcatttgtacgtcaaactattgctgacttatcaagcaaagaagtatcagaagcaactcgtattcaatatggcggtagtgttaaacctaacaacattaaagaatacatggcacaaactgatattgatggggcattagtaggtggcgcagcgtttaaagacgtgccagcctatgatttaggtgcgactttaatagaacatattattaaagagacgggtttgaatccaagtgagattgatgaagttatcatcggtaacgtactacaagcaggacaaggacaaaatccagcacgaattgctgctatgaaaggtggcttgccagaaacagtacctgcatttacagtgaataaagtatgtggttctgggttaaagtcgattcaattagcatatcaatctattgtgactggtgaaaatgacatcgtgctagctggcggtatggagaatatgtctcagtcaccaatgcttgtcaacaacagtcgcttcggttttaaaatgggacatcaatcaatggttgatagcatggtatatgatggtttaacagatgtatttaatcaatatcatatgggtattactgctgaaaatttagtagagcaatatggtatttcaagagaagaacaagatacatttgctgtaaactcacaacataaagcagtacgtgcacagcaa
ttattaatccaacaagctaaatcgaacagtgacacaacgccggcaatgccattggatacttgtggtgcaatgtcacagggtatgataggctattggttggaaactgaaatcaatcgcattttaactgaaatgaatagtgatagaactgtaggcacaatcgttacacgtgtggaagtagataaagatgatccacgattcaataacccaaccaaaccaattggtcctttttatacgaaagaagaagttgaagaattacaaaaagaacagccagactcagtctttaaagaagatgcaggacgtggttatagaaaagtagttgcgtcaccactacctcaatctatactagaacaccagttaattcgaactttagcagacggtaaaaatattgtcattgcatgcggtggtggcggtattccagttataaaaaaagaaaatacctatgaaggtgttgaagcgaattttaattctttaggattagatgatacttatgaagctttaaatattccaattgaagattttcatttaattaaagaaattatttcgaaaaaagaattagatggctttaatatcacaattcctcataaagaacgtatcataccgtatttagatcatgttgatgaacaagcgattaatgcaggtgcagttaacactgttttgataaaagatgacaagtggatagggtataatacagatggtattggttatgttaaaggattgcacagcgtttatccagatttagaaaatgcatacattttaattttgggcgcaggtggtgcaagtaaaggtattgcttatgaattagcaaaatttgtaaagcccaaattaactgttgcgaatagaacgatggctcgttttgaatcttggaatttaaatataaaccaaatttcattagcagatgctgaaaagtatttaggtgctgattggattgtcatcacagctggatggggattagcggttacaatgggtgtgtttgctgtcggtcaattctcaggtgcacatttaaacccagcggtgtctttagctcttgcattagacggaagttttgattggtcattagttcctggttatattgttgctcaaatgttaggtgcaattgtcggagcaacaattgtatggttaatgtacttgccacattggaaagcgacagaagaagctggcgcgaaattaggtgttttctctacagcaccggctattaagaattactttgccaactttttaagtgagattatcggaacaatggcattaactttaggtattttatttatcggtgtaaacaaaattgccgatggtttaaatcctttaattgtcggagcattaattgttgcaatcggattaagtttaggcggtgctactggttatgcaatcaacccagcacgtcgaatatttgaagatccaagtacatcatataagtattctatttcaatgacaacacgtcaaatgcgtgaaggtgaagttgatggcgtagattacttttttaaaactagggatgcgtttgaagctttaatcaaagatgaccaatttatagaatatgctgaatatgtaggcaactattatggtacaccagttcaatatgttaaagatacaatggacgaaggtcatgatgtatttttagaaattgaagtagaaggtgcaaagcaagttagaaagaaatttccagatgcgctatttattttcttagcacctccaagtttagaacacttgagagagcgattagtaggtagaggaacagaatctgatgagaaaatacaaagtcgtattaacgaagcgcgtaaagaagttgaaatgatgaatttatacgattacgttgcaacacaattacaagcaacagattatgttacaccaatcgtgttaggtgatgagactaaggttcaatctttagcgcaaaaacttgatcttgatatttctaatattgaattaattaatcctgcgacaagtgaattgaaagctgaattagttcaatcatttgttgaacgacgtaaaggtaaagcgactgaagaacaagcacaagaattattaaacaatgtgaactacttcggtacaatgcttgtttatgctggtaaagcagatggtttagttagtggtgcagcacattcaacaggagacactgtgcgtccagctttacaaatcatcaaaacgaaaccaggtgtatcaagaacatcaggtatcttctttatgattaaaggtgatgaacaatacatctttggtgattgtgcaatcaatccagaacttgattcacaaggacttgcagaaattgcagtagaaagtgcaaaatcagcattacacgaaacagatgaagaaattaacaaaaaagcgcacgctattttcaaacatggaatgactccaattatttgtgttggtgaaacagacgaagagcgtgaaagtggtaaagctaacgatgttgtaggtgagcaagttaagaaagctgttgcaggtttatctgaagatcaacttaaatcagttgtaattgcttatgagccaatctgggcaatcggaactggtaaatcatcaacatctgaagatgcaaatgaaatgtgtgcatttgtacgtcaaactattgctgacttatcaagcaaagaagtatcagaagcaactcgtattcaatatggtggtagtgttaaacctaacaacattaaagaatacatggcacaaactgatattgatggggcattagtaggtggcgcagcgtttaaagacgtgccagcctatgatttaggtgcgactttaatagaacatattattaaagagacgggtttgaatccaagtgagattgatgaagttatcatcggtaacgtactacaagcaggacaaggacaaaatccagcacgaattgctgctatgaaaggtggcttgccagaaacagtacctgcatttacagtgaataaagtatgtggttctgggttaaagtcgattcaattagcatatcaatctattgtgactggtgaaaatgacatcgtgctagctggcggtatggagaatatgtctcagtcaccaatgcttgtcaacaacagtcgcttcggttttaaaatgggacatcaatcaatggttgatagcatggtatatgatggtttaacagatgtatttaatcaatatcatatgggtattactgctgaaaatttagtggagcaatatggtatttcaagagaagaacaagatacatttgctgtaaactcacaacaaaaagcagtacgtgcacagcaa
ttattaatccaacaagctaaatcgaacagtgacacaacgccggcaatgccattggatacttgtggtgcaatgtcacagggtatgataggctattggttggaaactgaaatcaatcgcattttaactgaaatgaatagtgatagaactgtaggcacaatcgttacacgtgtggaagtagataaagatgatccacgattcaataacccaaccaaaccaattggtcctttttatacgaaagaagaagttgaagaattacaaaaagaacagccagactcagtctttaaagaagatgcaggacgtgattatagaaaagtagttgcgtcaccactacctcaatctatactagaacaccagttaattcgaactttagcagacggtaaaaatattgtcattgcatgcggtggtggcggtattccagttataaaaaaagaaaatacctatgaaggtgttgaagcgaattttaattctttaggattagatgatacttatgaagctttaaatattccaattgaagattttcatttaattaaagaaattatttcgaaaaaagaattagatggctttaatatcacaattcctcataaagaacgtatcataccgtatttagattatgttgatgaacaagcgattaatgcaggtgcagttaacactgttttgataaaagatggcaagtggatagggtataatacagatggtattggttatgttaaaggattgcacagcgtttatccagatttagaaaatgcatacattttaattttgggcgcaggtggtgcaagtaaaggtattgcttatgaattagcaaaatttgtaaagcccaaattaactgttgcgaatagaacgatggctcgttttgaatcttggaatttaaatataaaccaaatttcattggcagatgctgaaaagtatttaggtgctgattggattgtcatcacagctggatggggattagcggttacaatgggtgtgtttgctgtcggtcaattctcaggtgcacatttaaacccagcggtgtctttagctcttgcattagacggaagttttgattggtcattagttcctggttatattgttgctcaaatgttaggtgcaattgtcggagcaacaattgtatggttaatgtacttgccacattggaaagcgacagaagaagctggcgcgaaattaggtgttttctctacagcaccggctattaagaattactttgccaactttttaagtgagattatcggaacaatggcattaactttaggtattttatttatcggtgtaaacaaaattgccgatggtttaaatcctttaattgtcggagcattaattgttgcaatcggattaagtttaggcggtgctactggttatgcaatcaacccagcacgtcgaatatttgaagatccaagtacatcatataagtattctatttcaatgacaacacgtcaaatgcgtgaaggtgaagttgatggcgtagattacttttttaaaactagggatgcgtttgaagctttaattaaagatgaccaatttatagaatatgctgaatatgtaggcaactattatggtacaccagttcaatatgttaaagatacaatggacgaaggtcatgatgtatttttagaaattgaagtagaaggtgcaaagcaagttagaaagaaatttccagatgcgttatttattttcttagcacctccaagtttagatcacttgagagagcgattagtaggtagaggaacagaatccaatgagaaaatacaaagtcgtattaacgaagcgcgtaaagaagttgaaatgatgaatttatacgattacgttgcaacacaattacaagcaacagattatgttacaccaatcgtgttaggtgatgagactaaggttcaatctttagcgcaaaaacttgatcttgatatttctaatattgaattaattaatcctgcgacaagtgaattgaaagctgaattagttcaatcatttgttgaacgacgtaaaggtaaagcgactgaagaacaagcacaagaattattaaacaatgtgaactacttcggtacaatgcttgtttatgctggtaaagcagatggtttagttagtggtgcagcacattcaacaggagacactgtgcgtccagctttacaaatcatcaaaacgaaaccaggtgtatcaagaacatcaggtatcttctttatgattaaaggtgatgaacaatacatctttggtgattgtgcaatcaatccagaacttgattcacaaggacttgcagaaattgcagtagaaagtgcaaaatcagcattacacgaaacagatgaagaaattaacaaaaaagcgcacgctattttcaaacatggaatgactccaattatttgtgttggtgaaacagacgaagagcgtgaaagtggtaaagctaacgatgttgtaggtgagcaagttaagaaagctgttgcaggtttatctgaagatcaacttaaatcagttgtaattgcttatgagccaatctgggcaatcggaactggtaaatcatcaacatctgaagatgcaaatgaaatgtgtgcatttgtacgtcaaactattgctgacttatcaagcaaagaagtatcagaagcaactcgtattcaatatggtggtagtgttaaacctaacaacattaaagaatacatggcacaaactgatattgatggggcattagtaggtggcgcagcgtttaaagacgtgccagcctatgatttaggtgcgactttaatagaacatattattaaagagacgggtttgaatccaagtgagattgatgaagttatcatcggtaacgtactacaagcaggacaaggacaaaatccagcacgaattgctgctatgaaaggtggcttgccagaaacagtacctgcatttacagtgaataaagtatgtggttctgggttaaagtcgattcaattagcatatcaatctattgtgactggtgaaaatgacatcgtgctagctggcggtatggagaatatgtctcagtcaccaatgcttgtcaacaacagtcgcttcggttttaaaatgggacatcaatcaatggttgatagcatggtatatgatggtttaacagatgtatttaatcaatatcatatgggtattactgctgaaaatttagtagagcaatatggtatttcaagagaagaacaagatacatttgctgtaaactcacaacataaagcagtacgtgcacagcaa
ttattaatccaacaagctaaatcgaacagtgacacaacgccggcaatgccattggatacttgtggtgcaatgtcacagggtatgataggctattggttggaaactgaaatcaatcgcattttaactgaaatgaatagtgatagaactgtaggcacaatcgttacacgtgtggaagtagataaagatgatccacgattcaataacccaaccaaaccaattggtcctttttatacgaaagaagaagttgaagaattacaaaaagaacagccagactcagtctttaaagaagatgcaggacgtggttatagaaaagtagttgcgtcaccactacctcaatctatactagaacaccagttaattcgaactttagcagacggtaaaaatattgtcattgcatgcggtggtggcggtattccagttataaaaaaagaaaatacctatgaaggtgttgaagcgaattttaattctttaggattagatgatacttatgaagctttaaatattccaattgaagattttcatttaattaaagaaattatttcgaaaaaagaattagatggctttaatatcacaattcctcataaagaacgtatcataccgtatttagattatgttgatgaacaagcgattaatgcaggtgcagttaacactgttttgataaaagatggcaagtggatagggtataatacagatggtattggttatgttaaaggattgcacagcgtttatccagatttagaaaatgcatacattttaattttgggcgcaggtggtgcaagtaaaggtattgcttatgaattagcaaaatttgtaaagcccaaattaactgttgcgaatagaacgatggctcgttttgaatcttggaatttaaatataaaccaaatttcattggcagatgctgaaaagtatttaggtgctgattggattgtcatcacagctggatggggattagcggttacaatgggtgtgtttgctgtcggtcaattctcaggtgcacatttaaacccagcggtgtctttagctcttgcattagacggaagttttgattggtcattagttcctggttatattgttgctcaaatgttaggtgcaattgtcggagcaacaattgtatggttaatgtacttgccacattggaaagcgacagaagaagctggcgcgaaattaggtgttttctctacagcaccggctattaagaattactttgccaactttttaagtgagattatcggaacaatggcattaactttaggtattttatttatcggtgtaaacaaaattgccgatggtttaaatcctttaattgtcggagcattaattgttgcaatcggattaagtttaggcggtgctactggttatgcaatcaacccagcacgtcgaatatttgaagatccaagtacatcgtataagtattctatttcaatgacaacacgtcaaatgcgtgaaggtgaagttgatggcgtagattacttttttaaaactagggatgcgtttgaagctttaattaaagatgaccaatttatagaatatgctgaatatgtaggcaactattatggtacaccagttcaatatgttaaagatacaatggacgaaggtcatgatgtatttttagaaattgaagtagaaggtgcaaagcaagttagaaagaaatttccagatgcgttatttattttcttagcacctccaagtttagatcacttgagagagcgattagtaggtagaggaacagaatccaatgagaaaatacaaagtcgtattaacgaagcgcgtaaagaagttgaaatgatgaatttatacgattacgttgcaacacaattacaagcaacagattatgttacaccaatcgtgttaggtgatgagactaaggttcaatctttagcgcaaaaacttgatcttgatatttctaatattgaattaattaatcctgcgacaagtgaattgaaagctgaattagttcaatcatttgttgaacgacgtaaaggtaaagcgactgaagaacaagcacaagaattattaaacaatgtgaactacttcggtacaatgcttgtttatgctggtaaagcagatggtttagttagtggtgcagcacattcaacaggcgacactgtgcgtccagctttacaaatcatcaaaacgaaaccaggtgtatcaagaacatcaggtatcttctttatgattaaaggtgatgaacaatacatctttggtgattgtgcaatcaatccagaacttgattcacaaggacttgcagaaattgcagtagaaagtgcaaaatcagcattacacgaaacagatgaagaaattaacaaaaaagcgcacgctattttcaaacatggaatgactccaattatatgtgttggtgaaacagacgaagagcgtgaaagtggtaaagctaacgatgttgtaggtgagcaagttaagaaagctgttgcaggtttatctgaagatcaacttaaatcagttgtaattgcttatgaaccaatctgggcaatcggaactggtaaatcatcaacatctgaagatgcaaatgaaatgtgtgcatttgtacgtcaaactattgctgacttatcaagcaaagaagtatcagaagcaactcgtattcaatatggtggtagtgttaaacctaacaacattaaagaatacatggcacaaactgatattgatggggcattagtaggtggcgcagcgtttaaagacgtgccagcctatgatttaggtgcgactttaatagaacatattattaaagagacgggtttgaatccaagtgagattgatgaagttatcatcggtaacgtactacaagcaggacaaggacaaaatccagcacgaattgctgctatgaaaggtggcttgccagaaacagtacctgcatttacggtgaataaagtatgtggttctgggttaaagtcgattcaattagcatatcaatctattgtgactggtgaaaatgacatcgtgctagctggcggtatggagaatatgtctcaatcaccaatgcttgtcaacaacagtcgctttggttttaaaatgggacatcaatcaatggttgatagcatggtatatgatggtttaacagatgtatttaatcaatatcatatgggtattactgctgaaaatttagtagagcaatatggtatttcaagagaagaacaagatacatttgctgtaaactcacaacaaaaagcagtacgtgcacagcaa
ttattaatccaacaagctaaatcgaacagtgacacaacgccggcaatgccattggatacttgtggtgcaatgtcacagggtatgataggctattggttggaaactgaaatcaatcgcattttaactgaaatgaatagtgatagaactgtaggcacaatcgttacacgtgtggaagtagataaagatgatccacgattcaataacccaaccaaaccaattggtcctttttatacgaaagaagaagttgaagaattacaaaaagaacagccagactcagtctttaaagaagatgcaggacgtggttatagaaaagtagttgcgtcaccactacctcaatctatactagaacaccagttaattcgaactttagcagacggtaaaaatattgtcattgcatgcggtggtggcggtattccagttataaaaaaagaaaatacctatgaaggtgttgaagcgaattttaattctttaggattagatgatacttatgaagctttaaatattccaattgaagattttcatttaattaaagaaattatttcgaaaaaagaattagaaggctttaatatcacaattcctcataaagaacgtatcataccgtatttagattatgttgatgaacaagcgattaatgcaggtgcagttaacactgttttgataaaagatggcaagtggatagggtataatacagatggtattggttatgttaaaggattgcacagcgtttatccagatttagaaaatgcatacattttaattttgggcgcaggtggtgcaagtaaaggtattgcttatgaattagcaaaatttgtaaagcccaaattaactgttgcgaatagaacgatggctcgttttgaatcttggaatttaaatataaaccaaatttcattagcagatgctgaaaagtatttaggtgctgattggattgtcatcacagctggatggggattagcggttacaatgggtgtgtttgctgtcggtcaattctcaggtgcacatttaaacccagcggtgtctttagctcttgcattagacggaagttttgattggtcattagttcctggttatattgttgctcaaatgttaggtgcaattgtcggagcaacaattgtatggttaatgtacttgccacattggaaagcgacagaagaagctggcgcgaaattaggtgttttctctacagcaccggctattaagaattactttgccaactttttaagtgagattatcggaacaatggcattaactttaggtattttatttatcggtgtaaacaaaattgccgatggtttaaatcctttaattgtcggagcattaattgttgcaatcggattaagtttaggcggtgctactggttatgcaatcaacccagcacgtcgaatatttgaagatccaagtacatcatataagtattctatttcaatgacaacacgtcaaatgcgtgaaggtgaagttgatggcgtagattacttttttaaaactagggatgcgtttgaagctttaatcaaagatgaccaatttatagaatatgctgaatatgtaggcaactattatggtacaccagttcaatatgttaaagatacaatggacgaaggtcatgatgtatttttagaaattgaagtagaaggtgcaaagcaagttagaaagaaatttccagatgcgctatttattttcttagcacctccaagtttagaacacttgagagagcgattagtaggtagaggaacagaatccaatgagaaaatacaaagtcgtattaacgaagcgcgtaaagaagttgaaatgatgaatttatacgattacgttgcaacacaattacaagcaacagattatgttacaccaatcgtgttaggtgatgagactaaggttcaatctttagcgcaaaaacttaatcttgatatttctaatattgaattaattaatcctgcgacaagtgaattgaaagctgaattagtccaatcatttgttgaacgacgtaaaggtaaagcgactgaagaacaagcgcaagaattattaaacaatgtgaactacttcggtacaatgcttgtttatgctggtaaagcagatggtttagttagtggtgcagcacattcaacaggcgacactgtgcgtccagctttacaaatcatcaaaacgaaaccaggtgtatcaagaacatcaggtatcttctttatgattaaaggtgatgaacaatacatctttggtgattgtgcaatcaatccagaacttgattcacaaggacttgcagaaattgcagtagaaagtgcaaaatcagcattacacgaaacagatgaagaaattaacaaaaaagcgcacgctattttcaaacatggaatgactccaattatatgtgttggtgaaacagacgaagagcgtgaaagtggtaaagctaacgatgttgtaggtgagcaagttaagaaagctgttgcaggtttatctgaagatcaactaaaatcagttgtaattgcttatgaaccaatctgggcaatcggaactggtaaatcatcaacatctgaagatgcgaatgaaatgtgtgcatttgtacgtcaaactattgctgacttatcaagcaaagaagtatcagaagcaactcgtattcaatatggtggtagtgttaaacctaacaacattaaagaatacatggcacaaactgatattgatggggcattagtaggtggcgcagcgtttaaagacgtgccagcctatgatttaggtgcgactttaatagaacatattattaaagagacgggtttgaatccaagtgagattgatgaagttatcatcggtaacgtactacaagcaggacaaggacaaaatccagcacgaattgctgctatgaaaggtggcttgccagaaacagtacctgcatttacagtgaataaagtatgtggttctgggttaaagtcgattcaattagcatatcaatctattgtgactggtgaaaatgacatcgtgctagctggcggtatggagaatatgtctcagtcaccaatgcttgtcaacaacagtcgcttcggttttaaaatgggacatcaatcaatggttgatagcatggtatatgatggtttaacagatgtatttaatcaatatcatatgggtattactgctgaaaatttagtagagcaatatggtatttcaagagaagaacaagatacatttgctgtaaactcacaacataaagcagtacgtgcacagcaa
ttattaatccaacaagctaaatcgaacagtgacacaacgccggcaatgccattggatacttgtggtgcaatgtcacagggtatgataggctattggttggaaactgaaatcaatcgcattttaactgaaatgaatagtgatagaactgtaggcacaatcgttacacgtgtggaagtagataaagatgatccacgattcaataacccaaccaaaccaattggtcctttttatacgaaagaagaagttgaagaattacaaaaagaacagccagactcagtctttaaagaagatgcaggacgtggttatagaaaagtagttgcgtcaccactacctcaatctatactagaacaccagttaattcgaactttagcagacggtaaaaatattgtcattgcatgcggtggtggcggtattccagttataaaaaaagaaaatacctatgaaggtgttgaagcgaattttaattctttaggattagatgatacttatgaagctttaaatattccaattgaagattttcatttaattaaagaaattatttcgaaaaaagaattagatggctttaatatcacaattcctcataaagaacgtatcataccgtatttagattatgttgatgaacaagcgattaatgcaggtgcagttaacactgttttgataaaagatggcaagtggatagggtataatacagatggtattggttatgttaaaggattgcacagcgtttatccagatttagaaaatgcatacattttaattttgggcgcaggtggtgcaagtaaaggtattgcttatgaattagcaaaatttgtaaagcccaaattaactgttgcgaatagaacgatggctcgttttgaatcttggaatttaaatataaaccaaatttcattggcagatgctgaaaagtatttaggtgctgattggattgtcatcacagctggatggggattagcggttacaatgggtgtgtttgctgtcggtcaattctcaggtgcacatttaaacccagcggtgtctttagctcttgcattagacggaagttttgattggtcattagttcctggttatattgttgctcaaatgttaggtgcaattgtcggagcaacaattgtatggttaatgtacttgccacattggaaagcgacagaagaagctggcgcgaaattaggtgttttctctacagcaccggctattaagaattactttgccaactttttaagtgagattatcggagcaatggcattaactttaggtattttatttatcggtgtaaacaaaattgccgatggtttaaatcctttaattgtcggagcattaattgttgcaatcggattaagtttaggcggtgctactggttatgcaatcaacccagcacgtcgaatatttgaagatccaagtacatcatataagtattctatttcaatgacaacacgtcaaatgcgtgaaggtgaagttgatggcgtagattacttttttaaaactagggatgcgtttgaagctttaattaaagatgaccaatttatagaatatgctgaatatgtaggcaactattatggtacaccagttcaatatgttaaagatacaatggacgaaggtcatgatgtatttttagaaattgaagtagaaggtgcaaagcaagttagaaagaaatttccagatgcgttatttattttcttagcacctccaagtttagatcacttgagagagcgattagtaggtagaggaacagaatccaatgagaaaatacaaagtcgtattaacgaagcgcgtaaagaagttgaaatgatgaatttatacgattacgttgcaacacaattacaagcaacagattatgttacaccaatcgtgttaggtgatgagactaaggttcaatctttagcgcaaaaacttgatcttgatatttctaatattgaattaattaatcctgcgacaagtgaattgaaagctgaattagttcaatcatttgttgaacgacgtaaaggtaaagcgactgaagaacaagcacaagaattattaaacaatgtgaactacttcggtacaatgcttgtttatgctggtaaagcagatggtttagttagtggtgcagcacattcaacaggagacactgtgcgtccagctttacaaatcatcaaaacgaaaccaggtgtatcaagaacatcaggtatcttctttatgattaaaggtgatgaacaatacatctttggtgattgtgcaatcaatccagaacttgattcacaaggacttgcagaaattgcagtagaaagtgcaaaatcagcattacacgaaacagatgaagaaattaacaaaaaagcgcacgctattttcaaacatggaatgactccaattatttgtgttggtgaaacagacgaagagcgtgaaagtggtaaagctaacgatgttgtaggtgagcaagttaagaaagctgttgcaggtttatctgaagatcaacttaaatcagttgtaattgcttatgagccaatctgggcaatcggaactggtaaatcatcaacatctgaagatgcaaatgaaatgtgtgcatttgtacgtcaaactattgctgacttatcaagcaaagaagtatcagaagcaactcgtattcaatatggtggtagtgttaaacctaacaacattaaagaatacatggcacaaactgatattgatggggcattagtaggtggcgcagcgtttaaagacgtgccagcctatgatttaggtgcgactttaatagaacatattattaaagagacgggtttgaatccaagtgagattgatgaagttatcatcggtaacgtactacaagcaggacaaggacaaaatccagcacgaattgctgctatgaaaggtggcttgccagaaacagtacctgcatttacagtgaataaagtatgtggttctgggttaaagtcgattcaattagcatatcaatctattgtgactggtgaaaatgacatcgtgctagctggcggtatggagaatatgtctcagtcaccaatgcttgtcaacaacagtcgcttcggttttaaaatgggacatcaatcaatggttgatagcatggtatatgatggtttaacagatgtatttaatcaatatcatatgggtattactgctgaaaatttagtagagcaatatggtatttcaagagaagaacaagatacatttgctgtaaactcacaacataaagcagtacgtgcacagcaa
ttattaatccaacaagctaaatcgaacagtgacacaacgccggcaatgccattggatacttgtggtgcaatgtcacagggtatgataggctattggttggaaactgaaatcaatcgcattttaactgaaatgaatagtgatagaactgtaggcacaatcgttacacgtgtggaagtagataaagatgatccacgattcaataacccaaccaaaccaattggtcctttttatacgaaagaagaagttgaagaattacaaaaagaacagccagactcagtctttaaagaagatgcaggacgtggttatagaaaagtagttgcgtcaccactacctcaatctatactagaacaccagttaattcgaactttagcagacggtaaaaatattgtcattgcatgcggtggtggcggtattccagttataaaaaaagaaaatacctatgaaggtgttgaagcgaattttaattctttaggattagatgatacttatgaagctttaaatattccaattgaagattttcatttaattaaagaaattatttcgaaaaaagaattagatggctttaatatcacaattcctcataaagaacgtatcataccgtatttagatcatgttgatgaacaagcgattaatgcaggtgcagttaacactgttttgataaaagatgacaagtggatagggtataatacagatggtattggttatgttaaaggattgcacagcgtttatccagatttagaaaatgcatacattttaattttgggcgcaggtggtgcaagtaaaggtattgcttatgaattagcaaaatttgtaaagcccaaattaactgttgcgaatagaacgatggctcgttttgaatcttggaatttaaatataaaccaaatttcattagcagatgctgaaaagtatttaggtgctgattggattgtcatcacagctggatggggattagcggttacaatgggtgtgtttgctgtcggtcaattctcaggtgcacatttaaacccagcggtgtctttagctcttgcattagacggaagttttgattggtcattagttcctggttatattgttgctcaaatgttaggtgcaattgtcggagcaacaattgtatggttaatgtacttgccacattggaaagcgacagaagaagctggcgcgaaattaggtgttttctctacagcaccggctattaagaattactttgccaactttttaagtgagattatcggaacaatggcattaactttaggtattttatttatcggtgtaaacaaaattgccgatggtttaaatcctttaattgtcggagcattaattgttgcaatcggattaagtttaggcggtgctactggttatgcaatcaacccagcacgtcgaatatttgaagatccaagtacatcatataagtattctatttcaatgacaacacgtcaaatgcgtgaaggtgaagttgatggcgtagattacttttttaaaactagggatgcgtttgaagctttaatcaaagatgaccaatttatagaatatgctgaatatgtaggcaactattatggtacaccagttcaatatgttaaagatacaatggacgaaggtcatgatgtatttttagaaattgaagtagaaggtgcaaagcaagttagaaagaaatttccagatgcgctatttattttcttagcacctccaagtttagaacacttgagagagcgattagtaggtagaggaacagaatctgatgagaaaatacaaagtcgtattaacgaagcgcgtaaagaagttgaaatgatgaatttatacgattacgttgcaacacaattacaagcaacagattatgttacaccaatcgtgttaggtgatgagactaaggttcaatctttagcgcaaaaacttgatcttgatatttctaatattgaattaattaatcctgcgacaagtgaattgaaagctgaattagttcaatcatttgttgaacgacgtaaaggtaaagcgactgaagaacaagcacaagaattattaaacaatgtgaactacttcggtacaatgcttgtttatgctggtaaagcagatggtttagttagtggtgcagcacattcaacaggagacactgtgcgtccagctttacaaatcatcaaaacgaaaccaggtgtatcaagaacatcaggtatcttctttatgattaaaggtgatgaacaatacatctttggcgattgtgcaatcaatccagaacttgattcacaaggacttgcagaaattgcagtagaaagtgcaaaatcagcattacacgaaacagatgaagaaattaacaaaaaagcgcacgctattttcaaacatggaatgactccaattatttgtgttggtgaaacagacgaagagcgtgaaagtggtaaagctaacgatgttgtaggtgagcaagttaagaaagctgttgcaggtttatctgaagatcaacttaaatcagttgtaattgcttatgagccaatctgggcaatcggaactggtaaatcatcaacatctgaagatgcaaatgaaatgtgtgcatttgtacgtcaaactattgctgacttatcaagcaaagaagtatcagaagcaactcgtattcaatatggtggtagtgttaaacctaacaacattaaagaatacatggcacaaactgatattgatggggcattagtaggtggcgcagcgtttaaagacgtgccagcctatgatttaggtgcgactttaatagaacatattattaaagagacgggtttgaatccaagtgagattgatgaagttatcatcggtaacgtactacaagcaggacaaggacaaaatccagcacgaattgctgctatgaaaggtggcttgccagaaacagtacctgcatttacagtgaataaagtatgtggttctgggttaaagtcgattcaattagcatatcaatctattgtgactggtgaaaatgacatcgtgctagctggcggtatggagaatatgtctcagtcaccaatgcttgtcaacaacagtcgcttcggttttaaaatgggacatcaatcaatggttgatagcatggtatatgatggtttaacagatgtatttaatcaatatcatatgggtattactgctgaaaatttagtggagcaatatggtatttcaagagaagaacaagatacatttgctgtaaactcacaacaaaaagcagtacgtgcacagcaa
ttattaatccaacaagctaaatcgaacagtgacacaacgccggcaatgccattggatacttgtggtgcaatgtcacagggtatgataggctattggttggaaactgaaatcaatcgcattttaactgaaatgaatagtgatagaactgtaggcacaatcgttacacgtgtggaagtagataaagatgatccacgattcaataacccaaccaaaccaattggtcctttttatacgaaagaagaagttgaagaattacaaaaagaacagccagactcagtctttaaagaagatgcaggacgtggttatagaaaagtagttgcgtcaccactacctcaatctatactagaacaccagttaattcgaactttagcagacggtaaaaatattgtcattgcatgcggtggtggcggtattccagttataaaaaaagaaaatacctatgaaggtgttgaagcgaattttaattctttaggattagatgatacttatgaagctttaaatattccaattgaagattttcatttaattaaagaaattatttcgaaaaaagaattagaaggctttaatatcacaattcctcataaagaacgtatcataccgtatttagattatgttgatgaacaagcgattaatgcaggtgcagttaacactgttttgataaaagatggcaagtggatagggtataatacagatggtattggttatgttaaaggattgcacagcgtttatccagatttagaaaatgcatacattttaattttgggcgcaggtggtgcaagtaaaggtattgcttatgaattagcaaaatttgtaaagcccaaattaactgttgcgaatagaacgatggctcgttttgaatcttggaatttaaatataaaccaaatttcattagcagatgctgaaaagtatttaggtgctgattggattgtcatcacagctggatggggattagcggttacaatgggtgtgtttgctgtcggtcaattctcaggtgcacatttaaacccagcggtgtctttagctcttgcattagacggaagttttgattggtcattagttcctggttatattgttgctcaaatgttaggtgcaattgtcggagcaacaattgtatggttaatgtacttgccacattggaaagcgacagaagaagctggcgcgaaattaggtgttttctctacagcaccggctattaagaattactttgccaactttttaagtgagattatcggaacaatggcattaactttaggtattttatttatcggtgtaaacaaaattgccgatggtttaaatcctttaattgtcggagcattaattgttgcaatcggattaagtttaggcggtgctactggttatgcaatcaacccagcacgtcgaatatttgaagatccaagtacatcatataagtattctatttcaatgacaacacgtcaaatgcgtgaaggtgaagttgatggcgtagattacttttttaaaactagggatgcgtttgaagctttaatcaaagatgaccaatttatagaatatgctgaatatgtaggcaactattatggtacaccagttcaatatgttaaagatacaatggacgaaggtcatgatgtatttttagaaattgaagtagaaggtgcaaagcaagttagaaagaaatttccagatgcgctatttattttcttagcacctccaagtttagaacacttgagagagcgattagtaggtagaggaacagaatccaatgagaaaatacaaagtcgtattaacgaagcgcgtaaagaagttgaaatgatgaatttatacgattacgttgcaacacaattacaagcaacagattatgttacaccaatcgtgttaggtgatgagactaaggttcaatctttagcgcaaaaacttaatcttgatatttctaatattgaattaattaatcctgcgacaagtgaattgaaagctgaattagtccaatcatttgttgaacgacgtaaaggtaaagcgactgaagaacaagcgcaagaattattaaacaatgtgaactacttcggtacaatgcttgtttatgctggtaaagcagatggtttagttagtggtgcagcacattcaacaggcgacactgtgcgtccagctttacaaatcatcaaaacgaaaccaggtgtatcaagaacatcaggtatcttctttatgattaaaggtgatgaacaatacatctttggtgattgtgcaatcaatccagaacttgattcacaaggacttgcagaaattgcagtagaaagtgcaaaatcagcattacacgaatcagatgaagaaattaacaaaaaagcgcacgctattttcaaacatggaatgactccaattatatgtgttggtgaaacagacgaagagcgtgaaagtggtaaagctaacgatgttgtaggtgagcaagttaagaaagctgttgcaggtttatctgaagatcaactaaaatcagttgtaattgcttatgaaccaatctgggcaatcggaactggtaaatcatcaacatctgaagatgcgaatgaaatgtgtgcatttgtacgtcaaactattgctgacttatcaagcaaagaagtatcagaagcaactcgtattcaatatggtggtagtgttaaacctaacaacattaaagaatacatggcacaaactgatattgatggggcattagtaggtggcgcagcgtttaaagacgtgccagcctatgatttaggtgcgactttaatagaacatattattaaagagacgggtttgaatccaagtgagattgatgaagttatcatcggtaacgtactacaagcaggacaaggacaaaatccagcacgaattgctgctatgaaaggtggcttgccagaaacagtacctgcatttacagtgaataaagtatgtggttctgggttaaagtcgattcaattagcatatcaatctattgtgactggtgaaaatgacatcgtgctagctggcggtatggagaatatgtctcagtcaccaatgcttgtcaacaacagtcgcttcggttttaaaatgggacatcaatcaatggttgatagcatggtatatgatggtttaacagatgtatttaatcaatatcatatgggtattactgctgaaaatttagtagagcaatatggtatttcaagagaagaacaagatacatttgctgtaaactcacaacataaagcagtacgtgcacagcaa
ttattaatccaacaagctaaatcgaacagtgacacaacgccggcaatgccattggatacttgtggtgcaatgtcacagggtatgataggctattggttggaaactgaaatcaatcgcattttaactgaaatgaatagtgatagaactgtaggcacaatcgttacacgtgtggaagtagataaagatgatccacgattcaataacccaaccaaaccaattggtcctttttatacgaaagaagaagttgaagaattacaaaaagaacagccagactcagtctttaaagaagatgcaggacgtggttatagaaaagtagttgcgtcaccactacctcaatctatactagaacaccagttaattcgaactttagcagacggtaaaaatattgtcattgcatgcggtggtggcggtattccagttataaaaaaagaaaatacctatgaaggtgttgaagcgaattttaattctttaggattagatgatacttatgaagctttaaatattccaattgaagattttcatttaattaaagaaattatttcgaaaaaagaattagatggctttaatatcacaattcctcataaagaacgtatcataccgtatttagattatgttgatgaacaagcgattaatgcaggtgcagttaacactgttttgataaaagatggcaagtggatagggtataatacagatggtattggttatgttaaaggattgcacagcgtttatccagatttagaaaatgcatacattttaattttgggcgcaggtggtgcaagtaaaggtattgcttatgaattagcaaaatttgtaaagcccaaattaactgttgcgaatagaacgatggctcgttttgaatcttggaatttaaatataaaccaaatttcattggcagatgctgaaaagtatttaggtgctgattggattgtcatcacagctggatggggattagcggttacaatgggtgtgtttgctgtcggtcaattctcaggtgcacatttaaacccagcggtgtctttagctcttgcattagacggaagttttgattggtcattagttcctggttatattgttgctcaaatgttaggtgcaattgtcggagcaacaattgtatggttaatgtacttgccacattggaaagcgacagaagaagctggcgcgaaattaggtgttttctctacagcaccggctattaagaattactttgccaactttttaagtgagattatcggaacaatggcattaactttaggtattttatttatcggtgtaaacaaaattgccgatggtttaaatcctttaattgtcggagcattaattgttgcaatcggattaagtttaggcggtgctactggttatgcaatcaacccagcacgtcgaatatttgaagatccaagtacatcatataagtattctatttcaatgacaacacgtcaaatgcgtgaaggtgaagttgatggcgtagattacttttttaaaactagggatgcgtttgaagctttaattaaagatgaccaatttatagaatatgctgaatatgtaggcaactattatggtacaccagttcaatatgttaaagatacaatggacgaaggtcatgatgtatttttagaaattgaagtagaaggtgcaaagcaagttagaaagaaatttccagatgcgttatttattttcttagcacctccaagtttagatcacttgagagagcgattagtaggtagaggaacagaatccaatgagaaaatacaaagtcgtattaacgaagcgcgtaaagaagttgaaatgatgaatttatacgattacgttgcaacacaattacaagcaacagattatgttacaccaatcgtgttaggtgatgagactaaggttcaatctttagcgcaaaaacttgatcttgatatttctaatattgaattaattaatcctgcgacaagtgaattgaaagctgaattagttcaatcatttgttgaacgacgtaaaggtaaagcgactgaagaacaagcacaagaattattaaacaatgtgaactacttcggtacaatgcttgtttatgctggtaaagcagatggtttagttagtggtgcagcacattcaacaggagacactgtgcgtccagctttacaaatcatcaaaacgaaaccaggtgtatcaagaacatcaggtatcttctttatgattaaaggtgatgaacaatacatctttggtgattgtgcaatcaatccagaacttgattcacaaggacttgcagaaattgcagtagaaagtgcaaaatcagcattacatgaaacagatgaagaaattaacaaaaaagcgcacgctattttcaaacatggaatgactccaattatttgtgttggtgaaacagacgaagagcgtgaaagtggtaaagctaacgatgttgtaggtgagcaagttaagaaagctgttgcaggtttatctgaagatcaacttaaatcagttgtaattgcttatgagccaatctgggcaatcggaactggtaaatcatcaacatctgaagatgcaaatgaaatgtgtgcatttgtacgtcaaactattgcttacttatcaagcaaagaagtatcagaagcaactcgtattcaatatggtggtagtgttaaacctaacaacattaaagaatacatggcacaaactgatattgatggggcattagtaggtggcgcagcgtttaaagacgtgccagcctatgatttaggtgcgactttaatagaacatattattaaagagacgggtttgaatccaagtgagattgatgaagttatcatcggtaacgtactacaagcaggacaaggacaaaatccagcacgaattgctgctatgaaaggtggcttgccagaaacagtacctgcatttacagtgaataaagtatgtggttctgggttaaagtcgattcaattagcatatcaatctattgtgactggtgaaaatgacatcgtgctagctggcggtatggagaatatgtctcagtcaccaatgcttgtcaacaacagtcgcttcggttttaaaatgggacatcaatcaatggttgatagcatggtatatgatggtttaacagatgtatttaatcaatatcatatgggtattactgctgaaaatttagtagagcaatatggtatttcaagagaagaacaagatacatttgctgtaaactcacaacataaagcagtacgtgcacagcaa
ttattaatccaacaagctaaatcgaacagtgacacaacgccggcaatgccattggatacttgtggtgcaatgtcacagggtatgataggctattggttggaaactgaaatcaatcgcattttaactgaaatgaatagtgatagaactgtaggcacaatcgttacacgtgtggaagtagataaagatgatccacgattcaataacccaaccaaaccaattggtcctttttatacgaaagaagaagttgaagaattacaaaaagaacagccagactcagtctttaaagaagatgcaggacgtggttatagaaaagtagttgcgtcaccactacctcaatctatactagaacaccagttaattcgaactttagcagacggtaaaaatattgtcattgcatgcggtggtggcggtattccagttataaaaaaagaaaatacctatgaaggtgttgaagcgaattttaattctttaggattagatgatacttatgaagctttaaatattccaattgaagattttcatttaattaaagaaattatttcgaaaaaagaattagatggctttaatatcacaattcctcataaagaacgtatcataccgtatttagatcatgttgatgaacaagcgattaatgcaggtgcagttaacactgttttgataaaagatgacaagtggatagggtataatacagatggtattggttatgttaaaggattgcacagcgtttatccagatttagaaaatgcatacattttaattttgggcgcaggtggtgcaagtaaaggtattgcttatgaattagcaaaatttgtaaagcccaaattaactgttgcgaatagaacgatggctcgttttgaatcttggaatttaaatataaaccaaatttcattagcagatgctgaaaagtatttaggtgctgattggattgtcatcacagctggatggggattagcggttacaatgggtgtgtttgctgtcggtcaattctcaggtgcacatttaaacccagcggtgtctttagctcttgcattagacggaagttttgattggtcattagttcctggttatattgttgctcaaatgttaggtgcaattgtcggagcaacaattgtatggttaatgtacttgccacattggaaagcgacagaagaagctggcgcgaaattaggtgttttctctacagcaccggctattaagaattactttgccaactttttaagtgagattatcggaacaatggcattaactttaggtattttatttatcggtgtaaacaaaattgccgatggtttaaatcctttaattgtcggagcattaattgttgcaatcggattaagtttaggcggtgctactggttatgcaatcaacccagcacgtcgaatatttgaagatccaagtacatcatataagtattctatttcaatgacaacacgtcaaatgcgtgaaggtgaagttgatggcgtagattacttttttaaaactagggatgcgtttgaagctttaatcaaagatgaccaatttatagaatatgctgaatatgtaggcaactattatggtacaccagttcaatatgttaaagatacaatggacgaaggtcatgatgtatttttagaaattgaagtagaaggtgcaaagcaagttagaaagaaatttccagatgcgctatttattttcttagcacctccaagtttagaacacttgagagagcgattagtaggtagaggaacagaatctgatgagaaaatacaaagtcgtattaacgaagcgcgtaaagaagttgaaatgatgaatttatacgattacgttgcaacacaattacaagcaacagattatgttacaccaatcgtgttaggtgatgagactaaggttcaatctttagcgcaaaaacttgatcttgatatttctaatattgaattaattaatcctgcgacaagtgaattgaaagctgaattagttcaatcatttgttgaacgacgtaaaggtaaagcgactgaagaacaagcacaagaattattaaacaatgtgaactacttcggtacaatgcttgtttatgctggtaaagcagatggtttagttagtggtgcagcacattcaacaggagacactgtgcgtccagctttacaaatcatcaaaacgaaaccaggtgtatcaagaacatcaggtatcttctttatgattaaaggtgatgtacaatacatctttggtgattgtgcaatcaatccagaacttgattcacaaggacttgcagaaattgcagtagaaagtgcaaaatcagcattacacgaaacagatgaagaaattaacaaaaaagcgcacgctattttcaaacatggaatgactccaattatttgtgttggtgaaacagacgaagagcgtgaaagtggtaaagctaacgatgttgtaggtgagcaagttaagaaagctgttgcaggtttatctgaagatcaacttaaatcagttgtaattgcttatgagccaatctgggcaatcggaactggtaaatcatcaacatctgaagatgcaaatgaaatgtgtgcatttgtacgtcaaactattgctgacttatcaagcaaagaagtatcagaagcaactcgtattcaatatggtggtagtgttaaatctaacaacattaaagaatacatggcacaaactgatattgatggggcattagtaggtggcgcagcgtttaaagacgtgccagcctatgatttaggtgcgactttaatagaacatattattaaagagacgggtttgaatccaagtgagattgatgaagttatcatcggtaacgtactacaagcaggacaaggacaaaatccagcacgaattgctgctatgaaaggtggcttgccagaaacagtacctgcatttacagtgaataaagtatgtggttctgggttaaagtcgattcaattagcatatcaatctattgtgactggtgaaaatgacatcgtgctagctggcggtatggagaatatgtctcagtcaccaatgcttgtcaacaacagtcgcttcggttttaaaatgggacatcaatcaatggttgatagcatggtatatgatggtttaacagatgtatttaatcaatatcatatgggtattactgctgaaaatttagtggagcaatatggtatttcaagagaagaacaagatacatttgctgtaaactcacaacaaaaagcagtacgtgcacagcaa
ttattaatccaacaagctaaatcgaacagtgacacaacgccggcaatgccattggatacttgtggtgcaatgtcacagggtatgataggctattggttggaaactgaaatcaatcgcattttaactgaaatgaatagtgatagaactgtaggcacaatcgttacacgtgtggaagtagataaagatgatccacgattcaataacccaaccaaaccaattggtcctttttatacgaaagaagaagttgaagaattacaaaaagaacagccagactcagtctttaaagaagatgcaggacgtggttatagaaaagtagttgcgtcaccactacctcaatctatactagaacaccagttaattcgaactttagcagacggtaaaaatattgtcattgcatgcggtggtggcggtattccagttataaaaaaagaaaatacctatgaaggtgttgaagcgaattttaattctttaggattagatgatacttatgaagctttaaatattccaattgaagattttcatttaattaaagaaattatttcgaaaaaagaattagatggctttaatatcacaattcctcataaagaacgtatcataccgtatttagattatgttgatgaacaagcgattaatgcaggtgcagttaacactgttttgataaaagatggcaagtggatagggtataatacagatggtattggttatgttaaaggattgcacagcgtttatccagatttagaaaatacatacattttaattttgggcgcaggtggtgcaagtaaaggtattgcttatgaattagcaaaatttgtaaagcccaaattaactgttgcgaatagaacgatggctcgttttgaatcttggaatttaaatataaaccaaatttcattggcagatgctgaaaagtatttaggtgctgattggattgtcatcacagctggatggggattagcggttacaatgggtgtgtttgctgtcggtcaattctcaggtgcacatttaaacccagcggtgtctttagctcttgcattagacggaagttttgattggtcattagttcctggttatattgttgctcaaatgttaggtgcaattgtcggagcaacaattgtatggttaatgtacttgccacattggaaagcgacagaagaagctggcgcgaaattaggtgttttctctacagcaccggctattaagaattactttgccaactttttaagtgagattatcggaacaatggcattaactttaggtattttatttatcggtgtaaacaaaattgccgatggtttaaatcctttaattgtcggagcattaattgttgcaatcggattaagtttaggcggtgctactggttatgcaatcaacccagcacgtcgaatatttgaagatccaagtacatcatataagtattctatttcaatgacaacacgtcaaatgcgtgaaggtgaagttgatggcgtagattacttttttaaaactagggatgcgtttgaagctttaattaaagatgaccaatttatagaatatgctgaatatgtaggcaactattatggtacaccagttcaatatgttaaagatacaatggacgaaggtcatgatgtatttttagaaattgaagtagaaggtgcaaagcaagttagaaagaaatttccagatgcgttatttattttcttagcacctccaagtttagatcacttgagagagcgattagtaggtagaggaacagaatccaatgagaaaatacaaagtcgtattaacgaagcgcgtaaagaagttgaaatgatgaatttatacgattacgttgcaacacaattacaagcaacagattatgttacaccaatcgtgttaggtgatgagactaaggttcaatctttagcgcaaaaacttgatcttggtatttctaatattgaattaattaatcctgcgacaagtgaattgaaagctgaattagttcaatcatttgttgaacgacgtaaaggtaaagcgactgaagaacaagcacaagaattattaaacaatgtgaactacttcggtacaatgcttgtttatgctggtaaagcagatggtttagttagtggtgcagcacattcaacaggagacactgtgcgtccagctttacaaatcatcaaaacgaaaccaggtgtatcaagaacatcaggtatcttctttatgattaaaggtgatgaacaatacatctttggtgattgtgcaatcaatccagaacttgattcacaaggacttgcagaaattgcagtagaaagtgcaaaatcagcattacacgaaacagatgaagaaattaacaaaaaagcgcacgctattttcaaacatggaatgactccaattatttgtgttggtgaaacagacgaagagcgtgaaagtggtaaagctaacgatgttgtaggtgagcaagttaagaaagctgttgcaggtttatctgaagatcaacttaaatcagttgtaattgcttatgagccaatctgggcaatcggaactggtaaatcatcaacatctgaagatgcaaatgaaatgtgtgcatttgtacgtcaaactattgctgacttatcaagcaaagaagtatcagaagcaactcgtattcaatatggtggtagtgttaaacctaacaacattaaagaatacatggcacaaactgatattgatggggcattagtaggtggcgcagcgtttaaagacgtgccagcctatgatttaggtgcgactttaatagaacatattattaaagagacgggtttgaatccaagtgagattgatgaagttatcatcggtaacgtactacaagcaggacaaggacaaaatccagcacgaattgctgctatgaaaggtggcttgccagaaacagtacctgcatttacagtgaataaagtatgtggttctgggttaaagtcgattcaattagcatatcaatctattgtgactggtgaaaatgacatcgtgctagctggcggtatggagaatatgtctcagtcaccaatgcttgtcaacaacagtcgcttcggttttaaaatgggacatcaatcaatggttgatagcatggtatatgatggtttaacagatgtatttaatcaatatcatatgggtattactgctgaaaatttagtagagcaatatggtatttcaagagaagaacaagatacatttgctgtaaactcacaacataaagcagtacgtgcacagcaa
ttattaatccaacaagctaaatcgaacagtgacacaacgccggcaatgccattggatacttgtggtgcaatgtcacagggtatgataggctattggttggaaactgaaatcaatcgcattttaactgaaatgaatagtgatagaactgtaggcacaatcgttacacgtgtggaagtagataaagatgatccacgattcaataacccaaccaaaccaattggtcctttttatacgaaagaagaagttgaagaattacaaaaagaacagccagactcagtctttaaagaagatgcaggacgtggttatagaaaagtagttgcgtcaccactacctcaatctatactagaacaccagttaattcgaactttagcagacggtaaaaatattgtcgttgcatgcggtggtggcggtattccagttataaaaaaagaaaatacctatgaaggtgttgaagcgaattttaattctttaggattagatgatacttatgaagctttaaatattccaattgaagattttcatttaattaaagaaattatttcgaaaaaagaattagatggctttaatatcacaattcctcataaagaacgtatcataccgtatttagattatgttgatgaacaagcgattaatgcaggtgcagttaacactgttttgataaaagatggcaagtggatagggtataatacagatggtattggttatgttaaaggattgcacagcgtttatccagatttagaaaatgcatacattttaattttgggcgcaggtggtgcaagtaaaggtattgcttatgaattagcaaaatttgtaaagcccaaattaactgttgcgaatagaacgatggctcgttttgaatcttggaatttaaatataaaccaaatttcattggcagatgctgaaaagtatttaggtgctgattggattgtcatcacagctggatggggattagcggttacaatgggtgtgtttgctgtcggtcaattctcaggtgcacatttaaacccagcggtgtctttagctcttgcattagacggaagttttgattggtcattagttcctggttatattgttgctcaaatgttaggtgcaattgtcggagcaacaattgtatggttaatgtacttgccacattggaaagcgacagaagaagctggcgcgaaattaggtgttttctctacagcaccggctattaagaattactttgccaactttttaagtgagattatcggaacaatggcattaactttaggtattttatttatcggtgtaaacaaaattgccgatggtttaaatcctttaattgtcggagcattaattgttgcaatcggattaagtttaggcggtgctactggttatgcaatcaacccagcacgtcgaatatttgaagatccaagtacatcatataagtattctatttcaatgacaacacgtcaaatgcgtgaaggtgaagttgatggcgtagattacttttttaaaactagggatgcgtttgaagctttaattaaagatgaccaatttatagaatatgctgaatatgtaggcaactattatggtacaccagttcaatatgttaaagatacaatggacgaaggtcatgatgtatttttagaaattgaagtagaaggtgcaaagcaagttagaaagaaatttccagatgcgttatttattttcttagcacctccaagtttagatcacttgagagagcgattagtaggtagaggaacagaatccaatgagaaaatacaaagtcgtattaacgaagcgcgtaaagaagttgaaatgatgaatttatacgattacgttgcaacacaattacaagcaacagattatgttacaccaatcgtgttaggtgatgagactaaggttcaatctttagcgcaaaaacttgatcttgatatttctaatattgaattaattaatcctgcgacaagtgaattgaaagctgaattagttcaatcatttgttgaacgacgtaaaggtaaagcgactgaagaacaagcacaagaattattaaacaatgtgaactacttcggtacaatgcttgtttatgctggtaaagcagatggtttagttagtggtgcagcacattcaacaggagacactgtgcgtccagctttacaaatcatcaaaacgaaaccaggtgtatcaagaacatcaggtatcttctttatgattaaaggtgatgaacaatacatctttggtgattgtgcaatcaatccagaacttgattcacaaggacttgcagaaattgcagtagaaagtgcaaaatcagcattacacgaaacagatgaagaaattaacaaaaaagcgcacgctattttcaaacatggaatgactccaattatttgtgttggtgaaacagacgaagagcgtgaaagtggtaaagctaacgatgttgtaggtgagcaagttaagaaagctgttgcaggtttatctgaagatcaacttaaatcagttgtaattgcttatgagccaatctgggcaatcggaactggtaaatcatcaacatctgaagatgcaaatgaaatgtgtgcatttgtacgtcaaactattgctgacttatcaagcaaagaagtatcagaagcaactcgtattcaatatggtggtagtgttaaacctaacaacattaaagaatacatggcacaaactgatattgatggggcattagtaggtggcgcagcgtttaaagacgtgccagcctatgatttaggttcgactttaatagaacatattattaaagagacgggtttgaatccaagtgagattgatgaagttatcatcggtaacgtactacaagcaggacaaggacaaaatccagcacgaattgctgctatgaaaggtggcttgccagaaacagtacctgcatttacagtgaataaagtatgtggttctgggttaaagtcgattcaattagcatatcaatctattgtgactggtgaaaatgacatcgtgctagctggcggtatggagaatatgtctcagtcaccaatgcttgtcaacaacagtcgcttcggttttaaaatgggacatcaatcaatggttgatagcatggtatatgatggtttaacagatgtatttaatcaatatcatatgggtattactgctgaaaatttagtagagcaatatggtatttcaagagaagaacaagatacatttgctgtaaactcacaacataaagcagtacgtgcacagcaa
ttattaatccaacaagctaaatcgaacagtgacacaacgccggcaatgccattggatacttgtggtgcaatgtcacagggtatgataggctattggttggaaactgaaatcaatcgcattttaactgaaatgaatagtgatagaactgtaggcacaatcgttacacgtgtggaagtagataaagatgatccacgattcaataccccaaccaaaccaattggtcctttttatacgaaagaagaagttgaagaattacaaaaagaacagccagactcagtctttaaagaagatgcaggacgtggttatagaaaagtagttgcgtcaccactacctcaatctatactagaacaccagttaattcgaactttagcagacggtaaaaatattgtcattgcatgcggtggtggcggtattccagttataaaaaaagaaaatacctatgaaggtgttgaagcgaattttaattctttaggattagctgatacttatgaagctttaaatattccaattgaagattttcatttaattaaagaaattatttcaaaaaaagaattagatggctttaatatcacaattcctcataaagaacgtatcatatcgtatttagatcatgttgatgaacaagcgattaatgcaggtgcagttaacactgttttgataaaagatggcaagtggatagggtataatacagatggtattggttatgttaaaggattgcacagcgtttatccagatttagaaaatgcatacattttaattttgggcgcaggtggtgcaagtaaaggcattgcttatgaattagcaaaatttgtaaagcccaaattaactgttgcgaatagaacgatggctcgttttgaatcttggaatttaaatataaaccaaatttcattagcagatgctgaaaagtatttaggtgctgattggattgtcatcacagctggatggggattagcggttacaatgggtgtgtttgctgtcggtcaattctcaggtgcacatttaaacccagcggtgtctttagctcttgcattagacggaagttttgattggtcattagttcctggttatattgttgctcaaatgttaggtgcaattgtcggagcaacaattgtatggttaatgtacttgccacattggaaagcgacagaagaagctggcgcgaaattaggtgttttctctacagcaccggctattaagaattactttgccaactttttaagtgagattatcggaacaatggcattaactttaggtattttatttatcggtgtaaacaaaattgccgatggtttaaatcctttaattgtcggagcattaattgttgcaatcggattaagtttaggcggtgctactggttatgcaatcaacccagcacgtcgaatatttgaagatccaagtacatcatataagtattctatttcaatgacaacacgtcaaatgcgtgaaggtgaagttgatggcgtagattacttttttaaaactagggatgcgtttgaagctttaatcaaagatgaccaatttatagaatatgctgaatatgtaggcaactattatggtacaccagttcaatatgttaaagatacaatggacgaaggtcatgatgtatttttagaaattgaagtagaaggtgcaaagcaagttagaaagaaatttccagatgcgctatttattttcttagcacctccaagtttagaacacttgagagagcgattagtaggtagaggaacagaatctgatgagaaaatacaaagtcgtattaacgaagcgcgtaaagaagttgaaatgatgaatttatacgattacgttgcaacacaattacaagcaacagattatgttacaccaatcgtgttaggtgatgagactaaggttcaatctttagcgcaaaaacttgatcttgatatttctaatattgaattaattaatcctgcgacaagtgaattgaaagctgaattagttcaatcatttgttgaacgacgtaaaggtaaagcgactgaagaacaagcacaagaattattaaacaatgtgaactacttcggtacaatgcttgtttatgctggtaaagcagatggtttagttagtggtgcagcacattcaacaggagacactgtgcgtccagctttacaaatcatcaaaacgaaaccaggtgtatcaagaacatcaggtatcttctttatgattaaaggtgatgaacaatacatctttggtgattgtgcaatcaatccagaacttgattcacaaggacttgcagaaattgcagtagaaagtgcaaaatcagcattacacgaaacagatgaagaaattaacaaaaaagcgcacgctattttcaaatatggaatgactccaattatttgtgttggtgaaacagacgaagagcgtgaaagtggtaaagctaacgatgttgtaggtgagcaagttaagaaagctgttgcaggtttatctgaagatcaacttaaatcagttgtaattgcttatgagccaatctgggcaatcggaactggtaaatcatcaacatctgaagatgcaaatgaaatgtgtgcatttgtacgtcaaactattgctgacttatcaagcaaagaagtatcagaagcaactcgtattcaatatggtggtagtgttaaacctaacaacattaaagaatacatggcacaaactgatattgatggggcattagtaggtggcgcagcgtttaaagacgtgccagcctatgatttaggtgcgactttaatagaacatattattaaagagacgggtttgaatccaagtgagattgatgaagttatcatcggtaacgtactacaagcaggacaaggacaaaatccagcacgaattgctgctatgaaaggtggcttgccagaaacagtacctgcatttacagtgaataaagtatgtggttctgggttaaagtcgattcaattagcatatcaatctattgtgactggtgaaaatgacatcgtgctagctggcggtatggagaatatgtctcagtcaccaatgcttgtcaacaacagtcgctttggttttaaaatgggacatcaatcaatggttgatagcatggtatatgatggtttaacagatgtatttaatcaatatcatatgggtattactgctgaaaatttagtagagcaatatggtatttcaagagaagaacaagatacatttgctgtaaactcacaacaaaaagcagtacgtgcacagcaa
ttattaatccaacaagctaaatcgaacagtgacacaacgccggcaatgccattggatacttgtggtgcaatgtcacagggtatgataggctattggttggaaactgaaatcaatcgcattttaactgaaatgaatagtgatagaactgtaggcacaatcgttacacgtgtggaagtagataaagatgatccacgattcaataccccaaccaaaccaattggtcctttttatacgaaagaagaagttgaagaattacaaaaagaacagccagactcagtctttaaagaagatgcaggacgtggttatagaaaagtagttgcgtcaccactacctcaatctatactagaacaccagttaattcgaactttagcagacggtaaaaatattgtcattgcatgcggtggtggcggtattccagttataaaaaaagaaaatacctatgaaggtgttgaagcgaattttaattctttaggattagatgatacttatgaagctttaaatattccaattgaagattttcatttaattaaagaaattatttcgaaaaaagaattagatggctttaatatcacaattcctcataaagaacgtatcataccatatttagatcatgttgatgaacaagcgattaatgcaggtgcagttaacactgttttgataaaagatgacaagtggatagggtataatacagatggtattggttatgttaaaggattgcacagcgtttatccagatttagaaaatgcatacattttaattttgggcgcaggtggtgcaagtaaaggtattgcttatgaattagcaaaatttgtaaagcccaaattaactgttgcgaatagaacgatggctcgttttgaatcttggaatttaaatataaaccaaatttcaatagcagatgctgaaaagtatttaggtgctgattggattgtcatcacagctggatggggattagcggttacaatgggtgtgtttgctgtcggtcaattctcaggtgcacatttaaacccagcggtgtctttagctcttgcattagacggaagttttgattggtcattagttcctggttatattgttgctcaaatgttaggtgcaattgtcggagcaacaattgtatggttaatgtacttgccacattggaaagcgacagaagaagctggcgcgaaattaggtgttttctctacagcaccggctattaagaattactttgccaactttttaagtgagattatcggaacaatggcattaactttaggtattttatttatcggtgtaaacaaaattgccgatggtttaaatcctttaattgtcggagcattaattgttgcaatcggattaagtttaggcggtgctactggttatgcaatcaacccagcacgtcgaatatttgaagatccaagtacatcatataagtattctatttcaatgacaacacgtcaaatgcgtgaaggtgaagttgatggcgtagattacttttttaaaactagggatgcgtttgaagctttaatcaaagatgaccaatttatagaatatgctgaatatgtaggcaactattatggtacaccagttcaatatgttaaagatacaatggacgaaggtcatgatgtatttttagaaattgaagtagaaggtgcaaagcaagttagaaagaaatttccagatgcgctatttattttcttagcacctccaagtttagaacacttgagagagcgattagtaagtagaggaacagaatctgatgagaaaatacaaagtcgtattaacgaagcgcgtaaagaagttgaaatgatgaatttatacgattacgttgcaacacaattacaagcaacagattatgttacaccaatcgtgttaggtgatgagactaaggttcaatctttagcgcaaaaacttgatcttgatatttctaatattgaattaattaatcctgcgacaagtgaattgaaagctgaattagttcaatcatttgttgaacgacgtaaaggtaaagcgactgaagaacaagcacaagaattattaagcaatgtgaactacttcggtacaatgcttgtttatgctggtaaagcagatggtttagttagtggtgcagcacattcaacaggagacactgtgcgtccagctttacaaatcatcaaaacgaaaccaggtgtatcaagaacatcaggtatcttctttatgattaaaggtgatgtacaatacatctttggtgattgtgcaatcaatccagaacttgattcacaaggacttgcagaaattgcagtagaaagtgcaaaatcagcattacacgaaacagatgaagaaattaacaaaaaagcgcacgctattttcaaacatggaatgactccaattatttgtgttggtgaaacagacgaagagcgtgaaagtggtaaagctaacgatgttgtaggtgagcaagttaagaaagctgttgcaggtttatctgaagatcaacttaaatcagttgtaattgcttatgagccaatctgggcaatcggaactggtaaatcatcaacatctgaagatgcaaatgaaatgtgtgcatttgtacgtcaaactattgctgacttatcaagcaaagaagtatcagaagcaactcgtattcaatatggtggtagtgttaaacctaacaacattaaagaatacatggcacaaactgatattgatggggcattagtaggtggcgcagcgtttaaagacgtgccagcctatgatttaggtgcgactttaatagaacatattattaaagagacgggtttgaatccaagtgagattgatgaagttatcatcggtaacgtactacaagcaggacaaggacaaaatccagcacgaattgctgctatgaaaggtggcttgccagaaacagtacctgcatttacagtgaataaagtatgtggttctgggttaaagtcgattcaattagcatatcaatctattgtgactggtgaaaatgacatcgtgctagctggcggtatggagaatatgtctcagtcaccaatgcttgtcaacaacagtcgcttcggttttaaaatgggacatcaatcaatggttgatagcatggtatatgatggtttaacagatgtatttaatcaatatcatatgggtattactgctgaaaatttagtagagcaatatggtatttcaagagaagaacaagatacatttgctgtaaactcacaacaaaaagcagtacgtgcacagcaa
ttattaatccaacaagctaaatcgaacagtgacacaacgccggcaatgccattggatacttgtggtgcaatgtcacagggtatgataggctattggttggaaactgaaatcaatcgcattttaactgaaatgaatagtgatagaactgtaggcacaatcgttacacgtgtggaagtagataaagatgatccacgatttgataacccaactaaaccaattggtcctttttatacgaaagaagaagttgaagaattacaaaaagaacagccagactcagtctttaaagaagatgcaggacgtggttatagaaaagtagttgcgtcaccactacctcaatctatactagaacaccagttaattcgaactttagcagacggtaaaaatattgtcattgcatgcggtggtggcggtattccagttataaaaaaagaaaatacctatgaaggtgttgaagcgaattttaattctttaggattagatgatacttatgaagctttaaatattccaattgaagattttcatttaattaaagaaattatttcgaaaaaagaattagatggctttaatatcacaattcctcataaagaacgtatcataccgtatttagatcatgttgatgaacaagcgattaatgcaggtgcagttaacactgttttgataaaagatgacaagtggatagggtataatacagatggtattggttatgttaaaggattgcacagcgtttatccagatttagaaaatgcatacattttaattttgggcgcaggtggtgcaagtaaaggtattgcttatgaattagcaaaatttgtaaagcccaaattaactgttgcgaatagaacgatggctcgttttgaatcttggaatttaaatataaaccaaatttcattagcagatgctgaaaagtatttaggtgctgattggattgtcatcacagctggatggggattagcggttacaatgggtgtgtttgctgtcggtcaattctcaggtgcacatttaaacccagcggtgtctttagctcttgcattagacggaagttttgattggtcattagttcctggttatattgttgctcaaatgttaggtgcaattgtcggagcaacaattgtatggttaatgtacttgccacattggaaagcgacagaagaagctggcgcgaaattaggtgttttctctacagcaccggctattaagaattactttgccaactttttaagtgagattatcggaacaatggcattaactttaggtattttatttatcggtgtaaacaaaattgccgatggtttaaatcctttaattgtcggagcattaattgttgcaatcggattaagtttaggcggtgctactggttatgcaatcaacccagcacgtcgaatatttgaagatccaagtacatcgtataagtattctatttcaatgacaacacgtcaaatgcgtgaaggtgaagttgatggcgtagattacttttttaaaactagggatgcgtttgaagctttaattaaagatgaccaatttatagaatatgctgaatatgtaggcaactattatggtacaccagttcaatatgttaaagatacaatggacgaaggtcatgatgtatttttagaaattgaagtagaaggtgcaaagcaagttagaaagaaatttccagatgcgttatttattttcttagcacctccaagtttagatcacttgagagagcgattagtaggtagaggaacagaatccaatgagaaaatacaaagtcgtattaacgaagcgcgtaaagaagttgaaatgatgaatttatacgattacgttgcaacacaattacaagcaacagattatgttacaccaatcgtgttaggtgatgagactaaggttcaatctttagcgcaaaaacttgatcttgatatttctaatattgaattaattaatcctgcgacaagtgaattgaaagctgaattagttcaatcatttgttgaacgacgtaaaggtaaagcgactgaagaacaagcacaagaattattaaacaatgtgaactacttcggtacaatgcttgtttatgctggtaaagcagatggtttagttagtggtgcagcacattcaacaggagacactgtgcgtccagctttacaaatcatcaaaacgaaaccaggtgtatcaagaacatcaggtatcttctttatgattaaaggtgatgtacaatacatctttggtgattgtgcaatcaatccagaacttgattcacaaggacttgcagaaattgcagtagaaagtgcaaaatcagcattacacgaaacagatgaagaaattaacaaaaaagcgcacgctattttcaaacatggaatgactccaattatttgtgttggtgaaacagacgaagagcgtgaaagtggtaaagctaacgatgttgtaggtgagcaagttaagaaagctgttgcaggtttatctgaagatcaacttaaatcagttgtaattgcttatgagccaatctgggcaatcggaactggtaaatcatcaacatctgaagatgcaaatgaaatgtgtgcatttgtacgtcaaactattgctgacttatcaagcaaagaagtatcagaagcaactcgtattcaatatggtggtagtgttaaacctaacaacattaaagaatacatggcacaaactgatattgatggggcattagtaggtggcgcagcgtttaaagacgtgccagcctatgatttaggtgcgactttaatagaacatattattaaagagacgggtttgaatccaagtgagattgatgaagttatcatcggtaacgtactacaagcaggacaaggacaaaatccagcacgaattgctgctatgaaaggtggcttgccagaaacagtacctgcatttacagtgaataaagtatgtggttctgggttaaagtcgattcaattagcatatcaatctattgtgactggtgaaaatgacatcgtgctagctggcggtatggagaatatgtctcagtcaccaatgcttgtcaacaacagtcgcttcggttttaaaatgggacatcaatcaatggttgatagcatggtatatgatggtttaacagatgtatttaatcaatatcatatgggtattactgctgaaaatttagtggagcaatatggtatttcaagagaagaacaagatacatttgctgtaaactcacaacaaaaagcagtacgtgcacagcaa
ttattaatccaacaagctaaatcgaacagtgacacaacgccggcaatgccattggatacttgtggtgcaatgtcacagggtatgataggctattggttggaaactgaaatcaatcgcattttaactgaaatgaatagtgatagaactgtaggcacaatcgttacacgtgtggaagtagataaagatgatccacgatttgataacccaactaaaccaattggtcctttttatacgaaagaagaagttgaagaattacaaaaagaacagccagactcagtctttaaagaagatgcaggacgtggttatagaaaagtagttgcgtcaccactacctcaatctatactagaacaccagttaattcgaactttagcagacggtaaaaatattgtcattgcatgcggtggtggcggtattccagttataaaaaaagaaaatacctatgaaggtgttgaagcgaattttaattctttaggattagatgatacttatgaagctttaaatattccaattgaagattttcatttaattaaagaaattatttcgaaaaaagaattagaaggctttaatatcacaattcctcataaagaacgtatcataccgtatttagattatgttgatgaacaagcgattaatgcaggtgcagttaacactgttttgataaaagatggcaagtggatagggtataatacagatggtattggttatgttaaaggattgcacagcgtttatccagatttagaaaatgcatacattttaattttgggcgcaggtggtgcaagtaaaggtattgcttatgaattagcaaaatttgtaaagcccaaattaactgttgcgaatagaacgatggctcgttttgaatcttggaatttaaatataaaccaaatttcattagcagatgctgaaaagtatttaggtgctgattggattgtcatcacagctggatggggattagcggttacaatgggtgtgtttgctgtcggtcaattctcaggtgcacatttaaacccagcggtgtctttagctcttgcattagacggaagttttgattggtcattagttcctggttatattgttgctcaaatgttaggtgcaattgtcggagcaacaattgtatggttaatgtacttgccacattggaaagcgacagaagaagctggcgcgaaattaggtgttttctctacagcaccggctattaagaattactttgccaactttttaagtgagattatcggaacaatggcattaactttaggtattttatttatcggtgtaaacaaaattgccgatggtttaaatcctttaattgtcggagcattaattgttgcaatcggattaagtttaggcggtgctactggttatgcaatcaacccagcacgtcgaatatttgaagatccaagtacatcatataagtattctatttcaatgacaacacgtcaaatgcgtgaaggtgaagttgatggcgtagattacttttttaaaactagggatgcgtttgaagctttaatcaaagatgaccaatttatagaatatgctgaatatgtaggcaactattatggtacaccagttcaatatgttaaagatacaatggacgaaggtcatgatgtatttttagaaattgaagtagaaggtgcaaagcaagttagaaagaaattttcagatgcgctatttattttcttagcacctccaagtttagaacacttgagagagcgattagtaggtagaggaacagaatctgatgagaaaatacaaagtcgtattaacgaagcgcgtaaagaagttgaaatgatgaatttatacgattacgttgcaacacaattacaagcaacagattatgttacaccaatcgtgttaggtgatgagactaaggttcaatctttagcgcaaaaacttgatcttgatatttctaatattgaattaattaatcctgcgacaagtgaattgaaagctgaattagttcaatcatttgttgaacgacgtaaaggtaaagcgactgaagaacaagcacaagaattattaaacaatgtgaactacttcggtacaatgcttgtttatgctggtaaagcagatggtttagttagtggtgcagcacattcaacaggcgacactgtgcgtccagctttacaaatcatcaaaacgaaaccaggtgtatcaagaacatcaggtatcttctttatgattaaaggtgatgaacaatacatctttggtgattgtgcaatcaatccagaacttgattcacaaggacttgcagaaattgcagtagaaagtgcaaaatcagcattacacgaaacagatgaagaaattaacaaaaaagcgcacgctattttcaaacatggaatgactccaattatatgtgttggtgaaacagacgaagagcgtgaaagtggtaaagctaacgatgttgtaggtgagcaagttaagaaagctgttgcaggtttatctgaagatcaacttaaatcagttgtaattgcttatgaaccaatctgggcaatcggaactggtaaatcatcaacatctgaagatgcaaatgaaatgtgtgcatttgtacgtcaaactattgctgacttatcaagcaaagaagtatcagaagcaactcgtattcaatatggtggtagtgttaaacctaacaacattaaagaatacatggcacaaactgatattgatggggcattagtaggtggcgcagcgtttaaagacgtgccagcctatgatttaggtgcgactttaatagaacatattattaaagagacgggtttgaatccaagtgagattgatgaagttatcatcggtaacgtactacaagcaggacaaggacaaaatccagcacgaattgctgctatgaaaggtggcttgccagaaacagtacctgcatttacggtgaataaagtatgtggttctgggttaaagtcgattcaattagcatatcaatctattgtgactggtgaaaatgacatcgtgctagctggcggtatggagaatatgtctcaatcaccaatgcttgtcaacaacagtcgctttggttttaaaatgggacatcaatcaatggttgatagcatggtatatgatggtttaacagatgtatttaatcaatatcatatgggtattactgctgaaaatttagcagagcaatatggtatttcaagagaagaacaagatacatttgctgtaaactcacaacaaaaagcagtacgtgcacagcaa
ttattaatccaacaagctaaatcgaacagtgacacaacgccggcaatgccattggatacttgtggtgcaatgtcacagggtatgataggctattggttggaaactgaaatcaatcgcattttaactgaaatgaatagtgatagaactgtaggcacaatcgttacacgtgtggaagtagataaagatgatccacgatttgataacccaactaaaccaattggtcctttttatacgaaagaagaagttgaagaattacaaaaagaacagccagactcagtctttaaagaagatgcaggacgtggttatagaaaagtagttgcgtcaccactacctcaatctatactagaacaccagttaattcgaactttagcagacggtaaaaatattgtcattgcatgcggtggtggcggtattccagttataaaaaaagaaaatacctatgaaggtgttgaagcgaattttaattctttaggattagatgatacttatgaagctttaaatattccaattgaagattttcatttaattaaagaaattatttcgaaaaaagaattagaaggctttaatatcacaattcctcataaagaacgtatcataccgtatttagattatgttgatgaacaagcgattaatgcaggtgcagttaacactgttttgataaaagatggcaagtggatagggtataatacagatggtattggttatgttaaaggattgcacagcgtttatccagatttagaaaatgcatacattttaattttgggcgcaggtggtgcaagtaaaggtattgcttatgaattagcaaaatttgtaaagcccaaattaactgttgcgaatagaacgatggctcgttttgaatcttggaatttaaatataaaccaaatttcattagcagatgctgaaaagtatttaggtgctgattggattgtcatcacagctggatggggattagcggttacaatgggtgtgtttgctgtcggtcaattctcaggtgcacatttaaacccagcggtgtctttagctcttgcattagacggaagttttgattggtcattagttcctggttatattgttgctcaaatgttaggtgcaattgtcggagcaacaattgtatggttaatgtacttgccacattggaaagcgacagaagaagctggcgcgaaattaggtgttttctctacagcaccggctattaagaattactttgccaactttttaagtgagattatcggaacaatggcattaactttaggtattttatttatcggtgtaaacaaaattgccgatggtttaaatcctttaattgtcggagcattaattgttgcaatcggattaagtttaggcggtgctactggttatgcaatcaacccagcacgtcgaatatttgaagatccaagtacatcatataagtattctatttcaatgacaacacgtcaaatgcgtgaaggtgaagttgatggcgtagattacttttttaaaactagggatgcgtttgaagctttaatcaaagatgaccaatttatagaatatgctgaatatgtaggcaactattatggtacaccagttcaatatgttaaagatacaatggacgaaggtcatgatgtatttttagaaattgaagtagaaggtgcaaagcaagttagaaagaaatttccagatgcgctatttattttcttagcacctccaagtttagaacacttgagagagcgattagtaggtagaggaacagaatctgatgagaaaatacaaagtcgtattaacgaagcgcgtaaagaagttgaaatgatgaatttatacgattacgttgcaacacaattacaagcaacagattatgttacaccaatcgtgttaggtgatgagactaaggttcaatctttagcgcaaaaacttgatcttgatatttctaatattgaattaattaatcctgcgacaagtgaattgaaagctgaattagttcaatcatttgttgaacgacgtaaaggtaaagcgactgaagaacaagcacaagaattattaaacaatgtgaactacttcggtacaatgcttgtttatgctggtaaagcagatggtttagttagtggtgcagcacattcaacaggcgacactgtgcgtccagctttacaaatcatcaaaacgaaaccaggtgtatcaagaacatcaggtatcttctttatgattaaaggtgatgaacaatacatctttggtgattgtgcaatcaatccagaacttgattcacaaggacttgcagaaattgcagtagaaagtgcaaaatcagcattacacgaaacagatgaagaaattaacaaaaaagcgcacgctattttcaaacatggaatgactccaattatatgtgttggtgaaacagacgaagagcgtgaaagtggtaaagctaacgatgttgtaggtgagcaagttaagaaagctgttgcaggtttatctgaagatcaacttaaatcagttgtaattgcttatgaaccaatctgggcaatcggaactggtaaatcatcaacatctgaagatgcaaatgaaatgtgtgcatttgtacgtcaaactattgctgacttatcaagcaaagaagtatcagaagcaactcgtattcaatatggtggtagtgttaaacctaacaacattaaagaatacatggcacaaactgatattgatggggcattagtaggtggcgcagcgtttaaagacgtgccagcctatgatttaggtgcgactttaatagaacatattattaaagagacgggtttgaatccaagtgagattgatgaagttatcatcggtaacgtactacaagcaggacaaggacaaaatccagcacgaattgctgctatgaaaggtggcttgccagaaacagtacctgcatttacggtgaataaagtatgtggttctgggttaaagtcgattcaattagcatatcaatctattgtgactggtgaaaatgacatcgtgctagctggcggtatggagaatatgtctcaatcaccaatgcttgtcaacaacagtcgctttggttttaaaatgggacatcaatcaatggttgatagcatggtatatgatggtttaacagatgtatttaatcaatatcatatgggtattactgctgaaaatttagcagagcaatatggtatttcaagagaagaacaagatacatttgctgtaaactcacaacaaaaagcagtacgtgcacagcaa
ttattaatccaacaagctaaatcgaacagtgacacaacgccggcaatgccattggatacttgtggtgcaatgtcacagggtatgataggctattggttggaaactgaaatcaatcgcattttaactgaaatgaatagtgatagaactgtaggcacaatcgttacacgtgtggaagtagataaagatgatccacgatttgataacccaactaaaccaattggtcctttttatacgaaagaagaagttgaagaattacaaaaagaacagccagactcagtctttaaagaagatgcaggacgtggttatagaaaagtagttgcgtcaccactacctcaatctatactagaacaccagttaattcgaactttagcagacggtaaaaatattgtcattgcatgcggtggtggcggtattccagttataaaaaaagaaaatacctatgaaggtgttgaagcgaattttaattctttgggattagatgatacttatgaagctttaaatattccaattgaagattttcatttaattaaagaaattatttcgaaaaaagaattagaaggctttaatatcacaattcctcataaagaacgtatcataccgtatttagattatgttgatgaacaagcgattaatgcaggtgcagttaacactgttttgataaaagatggcaagtggatagggtataatacagatggtattggttatgttaaaggattgcacagcgtttatccagatttagaaaatgcatacattttaattttgggcgcaggtggtgcaagtaaaggtattgcttatgaattagcaaaatttgtaaagcccaaattaactgttgcgaatagaacgatggctcgttttgaatcttggaatttaaatataaaccaaatttcattagcagatgctgaaaagtatttaggtgctgattggattgtcatcacagctggatggggattagcggttacaatgggtgtgtttgctgtcggtcaattctcaggtgcacatttaaacccagcggtgtctttagctcttgcattagacggaagttttgattggtcattagttcctggttatattgttgctcaaatgttaggtgcaattgtcggagcaacaattgtatggttaatgtacttgccacattggaaagcgacagaagaagctggcgcgaaattaggtgttttctctacagcaccggctattaagaattactttgccaactttttaagtgagattatcggaacaatggcattaactttaggtattttatttatcggtgtaaacaaaattgccgatggtttaaatcctttaattgtcggagcattaattgttgcaatcggattaagtttaggcggtgctactggttatgcaatcaacccagcacgtcgaatatttgaagatccaagtacatcatataagtattctatttcaatgacaacacgtcaaatgcgtgaaggtgaagttgatggcgtagattacttttttaaaactagggatgcgtttgaagctttaatcaaagatgaccaatttatagaatatgctgaatatgtaggcaactattatggtacaccagttcaatatgttaaagatacaatggacgaaggtcatgatgtatttttagaaattgaagtagaaggtgcaaagcaagttagaaagaaatttccagatgcgctatttattttcttagcacctccaagtttagaacacttgagagagcgattagtaggtagaggaacagaatctgatgagaaaatacaaagtcgtattaacgaagcgcgtaaagaagttgaaatgatgaatttatacgattacgttgcaacacaattacaagcaacagattatgttacaccaatcgtgttaggtgatgagactaaggttcaatctttagcgcaaaaacttgatcttgatatttctaatattgaattaattaatcctgcgacaagtgaattgaaagctgaattagttcaatcatttgttgaacgacgtaaaggtaaagcgactgaagaacaagcacaagaattattaaacaatgtgaactacttcggtacaatgcttgtttatgctggtaaagcagatggtttagttagtggtgcagcacattcaacaggcgacactgtgcgtccagctttacaaatcatcaaaacgaaaccaggtgtatcaagaacatcaggtatcttctttatgattaaaggtgatgaacaatacatctttggtgattgtgcaatcaatccagaacttgattcacaaggacttgcagaaattgcagtagaaagtgcaaaatcagcattacacgaaacagatgaagaaattaacaaaaaagcgcacgctattttcaaacatggaatgactccaattatatgtgttggtgaaacagacgaagagcgtgaaagtggtaaagctaacgatgttgtaggtgagcaagttaagaaagctgttgcaggtttatctgaagatcaacttaaatcagttgtaattgcttatgaaccaatctgggcaatcggaactggtaaatcatcaacatctgaagatgcaaatgaaatgtgtgcatttgtacgtcaaactattgctgacttatcaagcaaagaagtatcagaagcaactcgtattcaatatggtggtagtgttaaacctaacaacattaaagaatacatggcacaaactgatattgatggggcattagtaggtggcgcagcgtttaaagacgtgccagcctatgatttaggtgcgactttaatagaacatattattaaagagacgggtttgaatccaagtgagattgatgaagttatcatcggtaacgtactacaagcaggacaaggacaaaatccagcacgaattgctgctatgaaaggtggcttgccagaaacagtacctgcatttacggtgaataaagtatgtggttctgggttaaagtcgattcaattagcatatcaatctattgtgactggtgaaaatgacatcgtgctagctggcggtatggagaatatgtctcaatcaccaatgcttgtcaacaacagtcgctttggttttaaaatgggacatcaatcaatggttgatagcatggtatatgatggtttaacagatgtatttaatcaatatcatatgggtattactgctgaaaatttagtagagcaatatggtatttcaagagaagaacaagatacatttgctgtaaactcacaacaaaaagcagtacgtgcacagcaa
ttattaatccaacaagctaaatcgaacagtgacacaacgccggcaatgccattggatacttgtggtgcaatgtcacagggtatgataggctattggttggaaactgaaatcaatcgcattttaactgaaatgaatagtgatagaactgtaggcacaatcgttacacgtgtggaagtagataaagatgatccacgatttgataacccaactaaaccaattggtcctttttatacgaaagaagaagttgaagaattacaaaaagaacagccagactcagtatttaaagaagatgcaggacgtggttatagaaaagtagttgcgtcaccactacctcaatctatactagaacaccagttaattcgaactttagcagacggtaaaaatattgtcattgcatgcggtggtggcggtattccagttataaaaaaagaaaatacctatgaaggtgttgaagcgaattttaattctttaggattagataatacttatgaagctttaaatattccaattgaagattttcatttaattaaagaaattatttcaaaaaaagaattagatggctttaatatcacaattccccataaagaacgtatcataccgtatttagattatgttgatgaacaagcgattaatgcaggtgcagttaacactgttttgataaaagatggcaagtggatagggtataatacagatggtatcggttatgttaaaggattgcacagcgtttatccagatttagaaaatgcatacattttaattttgggcgcaggtggtgcaagtaaaggtattgcttatgaattagcaaaatttgtaaagcccaaattaactgttgcgaatagaacgatggctcgttttgaatcttggaatttaaatataaaccaaatttcattggcagatgctgaaaagtatttaggtgctgattggattgtcatcacagctggatggggattagcggttacaatgggtgtgtatgctgtcggtcaattctcaggtgcacatttaaacccagcggtgtctttagctcttgcattagacggaagttttgattggtcattagttcctggttatattgttgctcaaatgttaggtgcaattgtcggagcaacgattgtatggttaatgtacttgccacattggaaagcgacagaagaagctggcgcgaaattaggtgttttttctacagcaccggctattaagaattactttgccaactttttaagtgagattatcggaacaatggcattaactttaggtattttatttatcggtgtaaacaaaattgccgatggtttaaatcctttaattgtcggagcattaattgttgcaatcggattaagtttaggcggtgctactggttatgcaatcaacccagcacgtcgaatatttgaagatccaagtacatcatataagtattctatttcaatgacaacacgtcaaatgcgtgaaggtgaagttgatggcgtagattacttttttaaaactagggatgcgtttgaagctttaattaaagatgaccaatttatagaatatgctgaatatgtaggcaactattatggtacaccagttcaatatgttaaagatacaatggacgaaggtcatgatgtatttttagaaattgaagtagaaggtgcaaagcaagttagaaagaaatttccagatgcgttatttattttcttagcacctccaagtttagatcacttgagagagcgattagtaggtagaggaacagaatctgatgagaaaatacaaagtcgtattaacgaagcacgtaaagaagtcgaaatgatgaatttatacgattacgttgcaacacaattacaagcaacagattatgttgcaccaatcgtgttaggtgatgagactaaggttcaatctttagcgcaaaaacttaatcttgatatttctaatattgaattaattaatcctgcgacaagtgaattgaaagctgaattagttcaatcatttgttgaacgacgtaaagggaaagcgactgaagaacaagcacaagaattattaaacaatgtgaactacttcggtacaatgcttgtttatgctggtaaagcagatggtctagttagtggtgcagcacattcaacaggcgacactgtgcgtccagctttacaaatcatcaaaacgaaaccaggtgtatcaagaacatcaggtatcttctttatgattaaaggtgatgaacaatacatctttggtgattgtgcaatcaatccagaacttgattcacaaggacttgcagaaattgcagtagaaagtgcaaaatcagcattacacgaaacagatgaagaaattaacaaaaaagcgcatgctattttcaaacatggtatgacaccaattatttgtgttggtgaaacagacgaagaacgtgaaagtggtaaagctaacgatgttgtaggtgagcaagttaagaaagctgttgcaggtttatctgaagagcaacttaaatcagttgtaattgcttatgaaccaatctgggcaatcggaactggtaaatcatcaacatctgaagatgcgaatgaaatgtgtgcatttgtacgtcaaactatttctgacttatcaagcaaagaagtatcagaagcaactcgtattcaatatggtggtagtgttaaacctaacaacattaaagaatacatggcacaaactgatattgatggggcattagtaggtggcgcagcgtttaaagacgtgccagcctatgatttaggtgcgactttaatagaacatattattaaagagacgggtttgaatccaagtgagattaatgaagtcatcatcggtaacgtactacaagcaggacaaggacaaaatccagcacgaattgctgctatgaaaggtggcttgccagaaacagtacctgcatttacagtgaataaagtatgtggttctgggttaaagtcgattcaattagcatatcaatctattgtgactggtgaaaatgacatcgtgctagctggcggtatggagaatatgtctcaatcaccaatgcttgtcaacaacagtcgctttggttttaaaatgggacatcaatcaatggttgatagcatggtatatgatggtttaacagatgtatttaatcaatatcatatgggtattactgctgaaaatttagtagaacaatatggtatttcaagagaagaacaagatacatttgctgtaaactcacaacaaaaagcagtacgtgcacagcaa
ttattaatccaacaagctaaatcgaacagtgacacaacgccggcaatgccattggatacttgtggtgcaatgtcacagggtatgataggctattggttggaaactgaaatcaatcgcattttaactgaaatgaatagtgatagaactgtaggcacaatcgttacacgtgtggaagtagataaagatgatccacgatttgataacccaactaaaccaattggtcctttttatacgaaagaagaagttgaagaattacaaaaagaacagccagactcagtctttaaagaagatgcaggacgtggttatagaaaagtagttgcgtcaccactacctcaatctatactagaacaccagttaattcgaactttagcagacggtaaaaatattgtcattgcatgcggtggtggcggtattccagttataaaaaaagaaaatacctatgaaggtgttgaagcgaattttaattctttgggattagatgatagttatgaagctttaaatattccaattgaagattttcatttaattaaagaaattatttcaaaaaaagaattagatggctttaatatcacaattcctcataaagagcgtatcataccgtatttagatcatgttgatgaacaagcgattaatgcaggtgcagttaatactgttttgataaaagatggcaagtggatagggtataatacagatggtattggttatgtaaaaggattgcacagcgtttatccagatttagaaaatgcatacattttaattttgggagcaggtggtgcaagtaaaggtattgcttatgaattagcaaaatttgtaaagcccaaattaactgttgcgaatagaacgttggctcgttttgaatcttggaatttaaatataaatcaaatttcattggcagatgctgaaaagtatttaggtgctgattggattgtcatcacagctggatggggattagcggttacaatgggtgtgtatgctgtcggtcaattctcaggtgcacatttaaacccagcggtgtctttagctcttgcattagacggaagttttgattggtcattagttcctggttatattgttgctcaaatgttaggtgcaattgtcggagcaacaattgtatggttaatgtacttgccacattggaaagcgacagaagaagctggcgcgaaattaggtgttttctctacagcaccagctattaagaattactttgccaactttttaagtgagattatcggaacaatggcattaactttaggtattttatttatcggtgtaaacaaaattgccgatggtttaaatcctttaattgtcggagcattaattgttgcaatcggattaagtttaggcggtgctactggttatgcaatcaacccagcacgtcgaatatttgaagatccaagtacatcatataagtattctatttcaatgacaacacgtcaaatgcgtgaaggtgaagttgatggcgtagattacttttttaaaactagggatgcgtttgaagctttaattaaagatgaccaatttatagaatatgctgaatatgtaggcaactattatggtacaccagttcaatatgttaaagatacaatggacgaaggtcatgatgtatttttagaaattgaagtagaaggtgcaaagcaagttagaaagaaatttccagatgcgttatttattttcttagcacctccaagtttagatcacttgagagagcgattagtaggtagaggaacagaatctgatgagaaaatacaaagtcgtattaacgaagcacgtaaagaagtcgaaatgatgaatttatacgattacgttgcaacacaattacaagcaacagattatgttacaccaatcgtgttaggtgatgagactaaggttcaatctttagcgcaaaaacttaatcttgatatttctaatattgaattaattaatcctgcgacaagtgaattgaaagctgaattagttcaatcatttgttgaacgacgtaaaggtaaagcgactgaagaacaagcacaagaattattaaacaatgtgaactacttcggtacaatgcttgtttatgctggtaaagcagatggcttagttagtggtgcagcacattcaacaggcgacactgtgcgtccagcattacaaatcatcaaaacgaaaccaggtgtatcaagaacatcaggtatcttctttatgattaaaggtgatgaacaatacatctttggtgattgtgcaatcaatccagaacttgattcacaaggacttgcagaaattgcagtagaaagtgcaaaatcagcattacacgaaacagatgaagaaattaacaaaaaagcgcatgctattttcaaacatggtatgacaccaattatttgtgttggtgaaacagatgaagagcgtgaaagtggtaaagctaacgatgttgtaggtgagcaagttaagaaagctgttgcaggtttatctgaagagcaacttaaatcagttgtaattgcttatgaaccaatctgggcaatcggaactggtaaatcatcaacatctgaagatgcgaatgaaatgtgtgcatttgtacgtcaaactattgctgacttatcaagcaaagaagtatcagaagcaactcgtattcaatatggtggtagtgttaaacctaacaacattaaagaatacatggcacaaactgatattgatggggcattagtaggtggcgcagcgtttaaagacgtgccagcctatgatttaggtgcgactttaatagaacatattattaaagagacgggtttgaatccaagtgagattaatgaagtcatcatcggtaacgtactacaagcaggacaaggacaaaatccagcacgaattgctgctatgaaaggtggcttgccagaaacagtacctgcatttacagtgaataaagtatgtggttctgggttaaagtcgattcaattagcatatcaatctattgtgactggtgaaaatgacatcgtgctagctggcggtatggagaatatgtctcaatcaccaatgcttgtcaacaacagtcgctttggttttaaaatgggacatcagtcaatggttgatagcatggtatatgatggtttaacagatgtatttaatcaatatcatatgggtattactgctgaaaatttagtagagcaatatggtatttcaagagaagaacaagatacatttgctgtaaactcacaacaaaaagcagtacgtgcacagcaa
ttattaatccaacaagctaaatcgaacagtgacacaacgccggcaatgccattggatacttgtggtgcaatgtcacagggtatgataggctattggttggaaactgaaatcaatcgcattttaactgaaatgaatagtgatagaactgtaggcacaatcgttacacgtgtggaagtagataaagatgatccacgatttgataacccaactaaaccaattggtcctttttatacgaaagaagaagttgaagaattacaaaaagaacagccagactcagtctttaaagaagatgcaggacgtggttatagaaaagtagttgcgtcaccactacctcaatctatactagaacaccagttaattcgaactttagcagacggtaaaaatattgtcattgcatgcggtggtggcggtattccagttataaaaaaagaaaatacctatgaaggtgttgaagcgaattttaattctttaggattagatgatacttatgaagctttaaatattccaattgaagattttcatttaattaaagaaattatttcgaaaaaagaattagaaggctttaatatcacaattcctcataaagaacgtatcataccgtatttagattatgttgatgaacaagcgattaatgcaggtgcagttaacactgttttgataaaagatggcaagtggatagggtataatacagatggtattggttatgttaaaggattgcacagcgtttatccagatttagaaaatgcatacattttaattttgggcgcaggtggtgcaagtaaaggtattgcttatgaattagcaaaatttgtaaagcccaaattaactgttgcgaatagaacgatggctcgttttgaatcttggaatttaaatataaaccaaatttcattagcagatgctgaaaagtatttaggtgctgattggattgtcatcacagctggatggggattagcggttacaatgggtgtgtttgctgtcggtcaattctcaggtgcacatttaaacccagcggtgtctttagctcttgcattagacggaagttttgattggtcattagttcctggttatattgttgctcaaatgttaggtgcaattgtcggagcaacaattgtatggttaatgtacttgccacattggaaagcgacagaagaagctggcgcgaaattaggtgttttctctacagcaccggctattaagaattactttgccaactttttaagtgagattatcggaacaatggcattaactttaggtattttatttatcggtgtaaacaaaattgccgatggtttaaatcctttaattgtcggagcattaattgttgcaatcggattaagtttaggcggtgctactggttatgcaatcaacccagcacgtcgaatatttgaagatccaagtacatcatataagtattctatttcaatgacaacacgtcaaatgcgtgaaggtgaagttgatggcgtagattacttttttaaaactagggatgcgtttgaagctttaatcaaagatgaccaatttatagaatatgctgaatatgtaggcaactattatggtacaccagttcaatatgttaaagatacaatggacgaaggtcatgatgtatttttagaaattgaagtagaaggtgcaaagcaagttagaaagaaatttccagatgcgctatttattttcttagcacctccaagtttagaacacttgagagagcgattagtaggtagaggaacagaatctgatgagaaaatacaaagtcgtattaacgaagcgcgtaaagaagttgaaatgatgaatttatacgattacgttgcaacacaattacaagcaacagattatgttacaccaatcgtgttaggtgatgagactaaggttcaatctttagcgcaaaaacttgatcttgatatttctaatattgaattaattaatcctgcgacaagtgaattgaaagctgaattagttcaatcatttgttgaacgacgtaaaggtaaagcgactgaagaacaagcacaagaattattaaacaatgtgaactacttcggtacaatgcttgtttatgctggtaaagcagatggtttagttagtggtgcagcacattcaacaggcgacactgtgcgtccagctttacaaatcatcaaaacgaaaccaggtgtatcaagaacatcaggtatcttctttatgattaaaggtgatgaacaatacatctttggtgattgtgcaatcaatccagaacttgattcacaaggacttgcagaaattgcagtagaaagtgcaaaatcagcattacacgaaacagatgaagaaattaacaaaaaagcgcacgctattttcaaacatggaatgactccaattatttgtgttggtgaaacagacgaagagcgtgaaagtggtaaagctaacgatgttgtaggtgagcaagttaagaaagctgttgcaggtttatctgaagatcaacttaaatcagttgtaattgcttatgaaccaatctgggcaatcggaactggtaaatcatcaacatctgaagatgcaaatgaaatgtgtgcatttgtacgtcaaactattgctgacttatcaagcaaagaagtatcagaagcaactcgtattcaatatggtggtagtgttaaacctaacaacattaaagaatacatggcacaaactgatattgatggggcattagtaggtggcgcagcgtttaaagacgtgccagcctatgatttaggtgcgactttaatagaacatattattaaagagacgggtttgaatccaagtgagattgatgaagttatcatcggtaacgtactacaagcaggacaaggacaaaatccagcacgaattgctgctatgaaaggtggcttgccagaaacagtacctgcatttacggtgaataaagtatgtggttctgggttaaagtcgattcaattagcatatcaatctattgtgactggtgaaaatgacatcgtgctagctggcggtatggagaatatgtctcaatcaccaatgcttgtcaacaacagtcgctttggttttaaaatgggacatcaatcaatggttgatagcatggtatatgatggtttaacagatgtatttaatcaatatcatatgggtattactgctgaaaatttagtagagcaatatggtatttcaagagaagaacaagatacatttgctgtaaactcacaacaaaaagcagtacgtgcacagcaa
ttattaatccaacaagctaaatcgaacagtgacacaacgccggcaatgccattggatacttgtggtgcaatgtcacagggtatgataggctattggttggaaactgaaatcaatcgcattttaactgaaatgaatagtgatagaactgtaggcacaatcgttacacgtgtggaagtagataaagatgatccacgatttgataacccaactaaaccaattggtcctttttatacgaaagaagaagttgaagaattacaaaaagaacagccagactcagtctttaaagaagatgcaggacgtggttatagaaaagtagttgcgtcaccactacctcaatctatactagaacaccagttaattcgaactttagcagacggtaaaaatattgtcattgcatgcggtggtggcggtattccagttataaaaaaagaaaatacctatgaaggtgttgaagcgaattttaattctttaggattagatgatacttatgaagctttaaatattccaattgaagattttcatttaattaaagaaattatttcgaaaaaagaattagaaggctttaatatcacaattcctcataaagaacgtatcataccgtatttagattatgttgatgaacaagcgattaatgcaggtgcagttaacactgttttgataaaagatggcaagtggatagggtataatacagatggtattggttatgttaaaggattgcacagcgtttatccagatttagaaaatgcatacattttaattttgggcgcaggtggtgcaagtaaaggtattgcttatgaattagcaaaatttgtaaagcccaaattaactgttgcgaatagaacgatggctcgttttgaatcttggaatttaaatataaaccaaatttcattagcagatgctgaaaagtatttaggtgctgattggattgtcatcacagctggatggggattagcggttacaatgggtgtgtttgctgtcggtcaattctcaggtgcacatttaaacccagcggtgtctttagctcttgcattagacggaagttttgattggtcattagttcctggttatattgttgctcaaatgttaggtgcaattgtcggagcaacaattgtatggttaatgtacttgccacattggaaagcgacagaagaagctggcgcgaaattaggtgttttctctacagcaccggctattaagaattactttgccaactttttaagtgagattatcggaacaatggcattaactttaggtattttatttatcggtgtaaacaaaattgccgatggtttaaatcctttaattgtcggagcattaattgttgcaatcggattaagtttaggcggtgctactggttatgcaatcaacccagcacgtcgaatatttgaagatccaagtacatcatataagtattctatttcaatgacaacacgtcaaatgcgtgaaggtgaagttgatggcgtagattacttttttaaaactagggatgcgtttgaagctttaatcaaagatgaccaatttatagaatatgctgaatatgtaggcaactattatggtacaccagttcaatatgttaaagatacaatggacgaaggtcatgatgtatttttagaaattgaagtagaaggtgcaaagcaagttagaaagaaatttccagatgcgctatttattttcttagcacctccaagtttagaacacttgagagagcgattagtaggtagaggaacagaatccaatgagaaaatacaaagtcgtattaacgaagcgcgtaaagaagttgaaatgatgaatttatacgattacgttgcaacacaattacaagcaacagattatgttacaccaatcgtgttaggtgatgagactaaggttcaatctttagcgcaaaaacttaatcttgatatttctaatattgaattaattaatcctgcgacaagtgaattgaaagctgaattagtccaatcatttgttgaacgacgtaaaggtaaagcgactgaagaacaagcgcaagaattattaaacaatgtgaactacttcggtacaatgcttgtttatgctggtaaagcagatggtttagttagtggtgcagcacattcaacaggcgacactgtgcgtccagctttacaaatcatcaaaacgaaaccaggtgtatcaagaacatcaggtatcttctttatgattaaaggtgatgaacaatacatctttggtgattgtgcaatcaatccagaacttgattcacaaggacttgcagaaattgcagtagaaagtgcaaaatcagcattacacgaaacagatgaagaaattaacaaaaaagcgcacgctattttcaaacatggaatgactccaattatatgtgttggtgaaacagacgaagagcgtgaaagtggtaaagctaacgatgttgtaggtgagcaagttaagaaagctgttgcaggtttatctgaagatcaactaaaatcagttgtaattgcttatgaaccaatctgggcaatcggaactggtaaatcatcaacatctgaagatgcgaatgaaatgtgtgcatttgtacgtcaaactattgctgacttatcaagcaaagaagtatcagaagcaactcgtattcaatatggtggtagtgttaaacctaacaacattaaagaatacatggcacaaactgatattgatggggcattagtaggtggcgcagcgtttaaagacgtgccagcctatgatttaggtgcgactttaatagaacatattattaaagagacgggtttgaatccaagtgagattgatgaagttatcatcggtaacgtactacaagcaggacaaggacaaaatccagcacgaattgctgctatgaaaggtggcttgccagaaacagtacctgcatttacagtgaataaagtatgtggttctgggttaaagtcgattcaattagcatatcaatctattgtgactggtgaaaatgacatcgtgctagctggcggtatggagaatatgtctcagtcaccaatgcttgtcaacaacagtcgcttcggttttaaaatgggacatcaatcaatggttgatagcatggtatatgatggtttaacagatgtatttaatcaatatcatatgggtattactgctgaaaatttagtagagcaatatggtatttcaagagaagaacaagatacatttgctgtaaactcacaacataaagcagtacgtgcacagcaa
ttattaatccaacaagctaaatcgaacagtgacacaacgccggcaatgccattggatacttgtggtgcaatgtcacagggtatgataggctattggttggaaactgaaatcaatcgcattttaactgaaatgaatagtgatagaactgtaggcacaatcgttacacgtgtggaagtagataaagatgatccacgatttgataacccaactaaaccaattggtcctttttatacgaaagaagaagttgaagaattacaaaaagaacagccagactcagtatttaaagaagatgcaggacgtggttatagaaaagtagttgcgtcaccactacctcaatctatactagaacaccagttaattcgaactttagcagacggtaaaaatattgtcattgcatgcggtggtggcggtattccagttataaaaaaagaaaatacctatgaaggtgttgaagcgaattttaattctttaggattagataatacttatgaagctttaaatattccaattgaagattttcatttaattaaagaaattatttcaaaaaaagaattagatggctttaatatcacaattccccataaagaacgtatcataccgtatttagattatgttgatgaacaagcgattaatgcaggtgcagttaacactgttttgataaaagatggcaagtggatagggtataatacagatggtatcggttatgttaaaggattgcacagcgtttatccagatttagaaaatgcatacattttaattttgggcgcaggtggtgcaagtaaaggtattgcttatgaattagcaaaatttgtaaagcccaaattaactgttgcgaatagaacgatggctcgttttgaatcttggaatttaaatataaaccaaatttcattggcagatgctgaaaagtatttaggtgctgattggattgtcatcacagctggatggggattagcggttacaatgggtgtgtatgctgtcggtcaattctcaggtgcacatttaaacccagcggtgtctttagctcttgcattagacggaagttttgattggtcattagttcctggttatattgttgctcaaatgttaggtgcaattgtcggagcaacgattgtatggttaatgtacttgccacattggaaagcgacagaagaagctggcgcgaaattaggtgttttttctacagcaccggctattaagaattactttgccaactttttaagtgagattatcggaacaatggcattaactttaggtattttatttatcggtgtaaacaaaattgccgatggtttaaatcctttaattgtcggagcattaattgttgcaatcggattaagtttaggcggtgctactggttatgcaatcaacccagcacgtcgaatatttgaagatccaagtacatcatataagtattctatttcaatgacaacacgtcaaatgcgtgaaggtgaagttgatggcgtagattacttttttaaaactagggatgcgtttgaagctttaattaaagatgaccaatttatagaatatgctgaatatgtaggcaactattatggtacaccagttcaatatgttaaagatacaatggacgaaggtcatgatgtatttttagaaattgaagtagaaggtgcaaagcaagttagaaagaaatttccagatgcgttatttattttcttagcacctccaagtttagatcacttgagagagcgattagtaggtagaggaacagaatctgatgagaaaatacaaagtcgtattaacgaagcacgtaaagaagtcgaaatgatgaatttatacgattacgttgcaacacaattacaagcaacagattatgttacaccaatcgtgttaggtgatgagactaaggttcaatctttagcgcaaaaacttaatcttgatatttctaatattgaattaattaatcctgcgacaagtgaattgaaagctgaattagttcaatcatttgttgaacgacgtaaagggaaagcgactgaagaacaagcacaagaattattaaacaatgtgaactacttcggtacaatgcttgtttatgctggtaaagcagatggtctagttagtggtgcagcacattcaacaggcgacactgtgcgtccagctttacaaatcatcaaaacgaaaccaggtgtatcaagaacatcaggtatcttctttatgattaaaggtgatgaacaatacatctttggtgattgtgcaatcaatccagaacttgattcacaaggacttgcagaaattgcagtagaaagtgcaaaatcagcattacacgaaacagatgaagaaattaacaaaaaagcgcatgctattttcaaacatggtatgacaccaattatttgtgttggtgaaacagacgaagaacgtgaaagtggtaaagctaacgatgttgtaggtgagcaagttaagaaagctgttgcaggtttatctgaagagcaacttaaatcagttgtaattgcttatgaaccaatctgggcaatcggaactggtaaatcatcaacatctgaagatgcgaatgaaatgtgtgcatttgtacgtcaaactatttctgacttatcaagcaaagaagtatcagaagcaactcgtattcaatatggtggtagtgttaaacctaacaacattaaagaatacatggcacaaactgatattgatggggcattagtaggtggcgcagcgtttaaagacgtgccagcctatgatttaggtgcgactttaatagaacatattattaaagagacgggtttgaatccaagtgagattaatgaagtcatcatcggtaacgtactacaagcaggacaaggacaaaatccagcacgaattgctgctatgaaaggtggcttgccagaaacagtacctgcatttacagtgaataaagtatgtggttctgggttaaagtcgattcaattagcatatcaatctattgtgactggtgaaaatgacatcgtgctagctggcggtatggagaatatgtctcaatcaccaatgcttgtcaacaacagtcgctttggttttaaaatgggacatcaatcaatggttgatagcatggtatatgatggtttaacagatgtatttaatcaatatcatatgggtattactgctgaaaatttagtagaacaatatggtatttcaagagaagaacaagatacatttgctgtaaactcacaacaaaaagcagtacgtgcacagcaa
ttattaatccaacaagctaaatcgaacagtgacacaacgccggcaatgccattggatacttgtggtgcaatgtcacagggtatgataggctattggttggaaactgaaatcaatcgcattttaactgaaatgaatagtgatagaactgtaggcacaatcgttacacgtgtggaagtagataaagatgatccacgatttgataacccaactaaaccaattggtcctttttatacgaaagaagaagttgaagaattacaaaaagaacagccagactcagtctttaaagaagatgcaggacgtggttatagaaaagtagttgcgtcaccactacctcaatctatactagaacaccagttaattcgaactttagcagacggtaaaaatattgtcattgcatgcggtggtggcggtattccagttataaaaaaagaaaatacctatgaaggtgttgaagcgaattttaattctttaggattagatgatacttatgaagctttaaatattccaattgaagattttcatttaattaaagaaattatttcgaaaaaagaattagaaggctttaatatcacaattcctcataaagaacgtatcataccgtatttagattatgttgatgaacaagcgattaatgcaggtgcagttaacactgttttgataaaagatggcaagtggatagggtataatacagatggtattggttatgttaaaggattgcacagcgtttatccagatttagaaaatgcatacattttaattttgggcgcaggtggtgcaagtaaaggtattgcttatgaattagcaaaatttgtaaagcccaaattaactgttgcgaatagaacgatggctcgttttgaatcttggaatttaaatataaaccaaatttcattagcagatgctgaaaagtatttaggtgctgattggattgtcatcacagctggatggggattagcggttacaatgggtgtgtttgctgtcggtcaattctcaggtgcacatttaaacccagcggtgtctttagctcttgcattagacggaagttttgattggtcattagttcctggttatattgttgctcaaatgttaggtgcaattgtcggagcaacaattgtatggttaatgtacttgccacattggaaagcgacagaagaagctggcgcgaaattaggtgttttctctacagcaccggctattaagaattactttgccaactttttaagtgagattatcggaacaatggcattaactttaggtattttatttatcggtgtaaacaaaattgccgatggtttaaatcctttaattgtcggagcattaattgttgcaatcggattaagtttaggcggtgctactggttatgcaatcaacccagcacgtcgaatatttgaagatccaagtacatcatataagtattctatttcaatgacaacacgtcaaatgcgtgaaggtgaagttgatggtgtagattacttttttaaaactagggatgcgtttgaagctttaatcaaagatgaccaatttatagaatatgctgaatatgtaggcaactattatggtacaccagttcaatatgttaaagatacaatggacgaaggtcatgatgtatttttagaaattgaagtagaaggtgcaaagcaagttagaaagaaatttccagatgcgctatttattttcttagcacctccaagtttagaacacttgagagagcgattagtaggtagaggaacagaatctgatgagaaaatacaaagtcgtattaacgaagcgcgtaaagaagttgaaatgatgaatttatacgattacgttgcaacacaattacaagcaacagattatgttacaccaatcgtgttaggtgatgagactaaggttcaatctttagcgcaaaaacttgatcttgatatttctaatattgaattaattaatcctgcgacaagtgaattgaaagctgaattagttcaatcatttgttgaacgacgtaaaggtaaagcgactgaagaacaagcacaagaattattaaacaatgtgaactacttcggtacaatgcttgtttatgctggtaaagcagatggtttagttagtggtgcagcacattcaacaggcgacactgtgcgtccagctttacaaatcatcaaaacgaaaccaggtgtatcaagaacatcaggtatcttctttatgattaaaggtgatgaacaatacatctttggtgattgtgcaatcaatccagaacttgattcacaaggacttgcagaaattgcagtagaaagtgcaaaatcagcattacacgaaacagatgaagaaattaacaaaaaagcgcacgctattttcaaacatggaatgactccaattatatgtgttggtgaaacagacgaagagcgtgaaagtggtaaagctaacgatgttgtaggtgagcaagttaagaaagctgttgcaggtttatctgaagatcaacttaaatcagttgtaattgcttatgaaccaatctgggcaatcggaactggtaaatcatcaacatctgaagatgcaaatgaaatgtgtgcatttgtacgtcaaactattgctgacttatcaagcaaagaagtatcagaagcaactcgtattcaatatggtggtagtgttaaacctaacaacattaaagaatacatggcacaaactgatattgatggggcattagtaggtggcgcagcgtttaaagacgtgccagcctatgatttaggtgcgactttaatagaacatattattaaagagacgggtttgaatccaagtgagattgatgaagttatcatcggtaacgtactacaagcaggacaaggacaaaatccagcacgaattgctgctatgaaaggtggcttgccagaaacagtacctgcatttacggtgaataaagtatgtggttctgggttaaagtcgattcaattagcatatcaatctattgtgactggtgaaaatgacatcgtgctagctggcggtatggagaatatgtctcaatcaccaatgcttgtcaacaacagtcgctttggttttaaaatgggacatcaatcaatggttgatagcatggtatatgatggtttaacagatgtatttaatcaatatcatatgggtattactgctgaaaatttagtagagcaatatggtatttcaagagaagaacaagatacatttgctgtaaactcacaacaaaaagcagtacgtgcacagcaa
ttattaatccaacaagctaaatcgaacagtgacacaacgccggcaatgccattggatacttgtggtgcaatgtcacagggtatgataggctattggttggaaactgaaatcaatcgcattttaactgaaatgaatagtgatagaactgtaggcacaatcgttacacgtgtggaagtagataaagatgatccacgatttgataacccaactaaaccaattggtcctttttatacgaaagaagaagttgaagaattacaaaaagaacagccagactcagtctttaaagaagatgcaggacgtggttatagaaaagtagttgcgtcaccactacctcaatctatactagaacaccagttaattcgaactttagcagacggtaaaaatattgtcattgcatgcggtggtggcggtattccagttataaaaaaagaaaatacctatgaaggtgttgaagcgaattttaattctttaggattagatgatacttatgaagctttaaatattccaattgaagattttcatttaattaaagaaattatttcgaaaaaagaattagaaggctttaatatcacaattcctcataaagaacgtatcataccgtatttagattatgttgatgaacaagcgattaatgcaggtgcagttaacactgttttgataaaagatggcaagtggatagggtataatacagatggtattggttatgttaaaggattgcacagcgtttatccagatttagaaaatgcatacattttaattttgggcgcaggtggtgcaagtaaaggtattgcttatgaattagcaaaatttgtaaagcccaaattaactgttgcgaatagaacgatggctcgttttgaatcttggaatttaaatataaaccaaatttcattagcagatgctgaaaagtatttaggtgctgattggattgtcatcacagctggatggggattagcggttacaatgggtgtgtttgctgtcggtcaattctcaggtgcacatttaaacccagcggtgtctttagctcttgcattagacggaagttttgattggtcattagttcctggttatattgttgctcaaatgttaggtgcaattgtcggagcaacaattgtatggttaatgtacttgccacattggaaagcgacagaagaagctggcgcgaaattaggtgttttctctacagcaccggctattaagaattactttgccaactttttaagtgagattatcggaacaatggcattaactttaggtattttatttatcggtgtaaacaaaattgccgatggtttaaatcctttaattgtcggagcattaattgttgcaatcggattaagtttaggcggtgctactggttatgcaatcaacccagcacgtcgaatatttgaagatccaagtacatcatataagtattctatttcaatgacaacacgtcaaatgcgtgaaggtgaagttgatggcgtagattacttttttaaaactagggatgcgtttgaagctttaatcaaagatgaccaatttatagaatatgctgaatatgtaggcaactattatggtacaccagttcaatatgttaaagatacaatggacgaaggtcatgatgtatttttagaaattgaagtagaaggtgcaaagcaagttagaaagaaatttccagatgcgctatttattttcttagcacctccaagtttagaacacttgagagagcgattagtaggtagaggaacagaatctgatgagaaaatacaaagtcgtattaacgaagcgcgtaaagaagttgaaatgatgaatttatacgattacgttgcaacacaattacaagcaacagattatgttacaccaatcgtgttaggtgatgagactaaggttcaatctttagcgcaaaaacttgatcttgatatttctaatattgaattaattaatcctgcgacaagtgaattgaaagctgaattagttcaatcatttgttgaacgacgtaaaggtaaagcgactgaagaacaagcacaagaattattaaacaatgtgaactacttcggtacaatgcttgtttatgctggtaaagcagatggtttagttagtggtgcagcacattcaacaggcgacactgtgcgtccagctttacaaatcatcaaaacgaaaccaggtgtatcaagaacatcaggtatcttctttatgattaaaggtgatgaacaatacatctttggtgattgtgcaatcaatccagaacttgattcacaaggacttgcagaaattgcagtagaaagtgcaaaatcagcattacacgaaacagatgaagaaattaacaaaaaagcgcacgctattttcaaacatggaatgactccaattatatgtgttggtgaaacagacgaagagcgtgaaagtggtaaagctaacgatgttgtaggtgagcaagttaagaaagctgttgcaggtttatctgaagatcaacttaaatcagttgtaattgcttatgaaccaatctgggcaatcggaactggtaaatcatcaacatctgaagatgcaaatgaaatgtgtgcatttgtacgtcaaactattgctgacttatcaagcaaagaagtatcaaaagcaactcgtattcaatatggtggtagtgttaaacctaacaacattaaagaatacatggcacaaactgatattgatggggcattagtaggtggcgcagcgtttaaagacgtgccagcctatgatttaggtgcgactttaatagaacatattattaaagagacgggtttgaatccaagtgagattgatgaagttatcatcggtaacgtactacaagcaggacaaggacaaaatccagcgcgaattgctgctatgaaaggtggcttgccagaaacagtacctgcatttacggtgaataaagtatgtggttctgggttaaagtcgattcaattagcatatcaatctattgtgactggtgaaaatgacatcgtgctagctggcggtatggagaatatgtctcaatcaccaatgcttgtcaacaacagtcgctttggttttaaaatgggacatcaatcaatggttgatagcatggtatatgatggtttaacagatgtatttaatcaatatcatatgggtattactgctgaaaatttagtagagcaatatggtatttcaagagaagaacaagatacatttgctgtaaactcacaacaaaaagcagtacgtgcacagcaa
ttattaatccaacaagctaaatcgaacagtgacacaacgccggcaatgccattggatacttgtggtgcaatgtcacagggtatgataggctattggttggaaactgaaatcaatcgcattttaactgaaatgaatagtgatagaactgtaggcacaatcgttacacgtgtggaagtagataaagatgatccacgatttgataacccaactaaaccaattggtcctttttatacgaaagaagaagttgaagaattacaaaaagaacagccagactcagtctttaaagaagatgcaggacttggttatagaaaagtagttgcgtcaccactacctcaatctatactagaacaccagttaattcgaactttagcagacggtaaaaatattgtcattgcatgcggtggtggcggtattccagttataaaaaaagaaaatacctatgaaggtgttgaagcgaattttaattctttaggattagatgatacttatgaagctttaaatattccaattgaagattttcatttaattaaagaaattatttcgaaaaaagaattagatggctttaatatcacaattcctcataaagaacgtatcataccgtatttagattatgttgatgaacaagcgattaatgcaggtgcagttaacactgttttgataaaagatggcaagtggatagggtataatacagatggtattggttatgttaaaggattgcacagcgtttatccagatttagaaaatgcatacattttaattttgggcgcaggtggtgcaagtaaaggtattgcttatgaattagcaaaatttgtaaagcccaaattaactgttgcgaatagaacgatggctcgttttgaatcttggaatttaaatataaaccaaatttcattggcagatgctgaaaagtatttaggtgctgattggattgtcatcacagctggatggggattagcggttacaatgggtgtgtttgctgtcggtcaattctcaggtgcacatttaaacccagcggtgtctttagctcttgcattagacggaagttttgattggtcattagttcctggttatattgttgctcaaatgttaggtgcaattgtcggagcaacaattgtatggttaatgtacttgccacattggaaagcgacagaagaagctggcgcgaaattaggtgttttctctacagcaccggctattaagaattactttgccaactttttaagtgagattatcggaacaatggcattaactttaggtattttatttatcggtgtaaacaaaattgccgatggtttaaatcctttaattgtcggagcattaattgttgcaatcggattaagtttaggcggtgctactggttatgcaatcaacccagcacgtcgaatatttgaagatccaagtacatcatataagtattctatttcaatgacaacacgtcaaatgcgtgaaggtgaagttgatggcgtagattacttttttaaaactagggatgcgtttgaagctttaattaaagatgaccaatttatagaatatgctgaatatgtaggcaactattatggtacaccagttcaatatgttaaagatacaatggacgaaggtcatgatgtatttttagaaattgaagtagaaggtgcaaagcaagttagaaagaaatttccagatgcgttatttattttcttagcacctccaagtttagatcacttgagagagcgattagtaggtagaggaacagaatccaatgagaaaatacaaagtcgtattaacgaagcgcgtaaagaagttgaaatgatgaatttatacgattacgttgcaacacaattacaagcaacagattatgttacaccaatcgtgttaggtgatgagactaaggttcaatctttagcgcaaaaacttgatcttgatatttctaatattgaattaattaatcctgcgacaagtgaattgaaagctgaattagttcaatcatttgttgaacgacgtaaaggtaaagcgactgaagaacaagcacaagaattattaaacaatgtgaactacttcggtacaatgcttgtttatgctggtaaagcagatggtttagttagtggtgcagcacattcaacaggcgacactgtgcgtccagctttacaaatcatcaaaacgaaaccaggtgtatcaagaacatcaggtatcttctttatgattaaaggtgatgaacaatacatctttggtgattgtgcaatcaatccagaacttgattcacaaggacttgcagaaattgcagtagaaagtgcaaaatcagcattacacgaaacagatgaagaaattaacaaaaaagcgcacgctattttcaaacatggaatgactccaattatatgtgttggtgaaacagacgaagagcgtgaaagtggtaaagctaacgatgttgtaggtgagcaagttaagaaagctgttgcaggtttatctgtagatcaacttaaatcagttgtaattgcttatgaaccaatctgggcaatcggaactggtaaatcatcaacatctgaagatgcaaatgaaatgtgtgcatttgtacgtcaaactattgctgacttatcaagcaaagaagtatcagaagcaactcgtattcaatatggtggtagtgttaaacctaacaacattaaagaatacatggcacaaactgatattgatggggcattagtaggtggcgcagcgtttaaagacgtgccagcctatgatttaggtgcgactttaatagaacatattattaaagagacgggtttgaatccaagtgagattgatgaagttatcatcggtaacgtactacaagcaggacaaggacaaaatccagcacgaattgctgctatgaaaggtggcttgccagaaacagtacctgcatttacggtgaataaagtatgtggttctgggttaaagtcgattcaattagcatatcaatctattgtgactggtgaaaatgacatcgtgctagctggcggtatggagaatatgtctcaatcaccaatgcttgtcaacaacagtcgctttggttttaaaatgggacatcaatcaatggttgatagcatggtatatgatggtttaacagatgtatttaatcaatatcatatgggtattactgctgaaaatttagtagagcaatatggtatttcaagagaagaacaagatacatttgctgtaaactcacaacaaaaagcagtacgtgcacagcaa
ttattaatccaacaagctaaatcgaacagtgacacaacgccggcaatgccattggatacttgtggtgcaatgtcacagggtatgataggctattggttggaaactgaaatcaatcgcattttaactgaaatgaatagtgatagaactgtaggcacaatcgttacacgtgtggaagtagataaagatgatccacgatttgataacccaactaaaccaattggtcctttttatacgaaagaagaagttgaagaattacaaaaagaacagccagactcagtctttaaagaagatgcaggacgtggttatagaaaagtagttgcgtcaccactacctcaatctatactagaacaccagttaattcgaactttagcagacggtaaaaatattgtcattgcatgcggtggtggcggtattccagttataaaaaaagaaaatacctatgaaggtgttgaagcgaattttaattctttaggattagatgatacttatgaagctttaaatattccaattgaagattttcatttaattaaagaaattatttcgaaaaaagaattagatggttttaatatcacaattcctcataaagaacgtatcataccgtatttagatcatgttgatgaacaagcgattaatgcaggtgcagttaacactgttttgataaaagatgacaagtggatagggtataatacagatggtattggttatgttaaaggattgcacagcgtttatccagatttagaaaatgcatacattttaattttgggcgcaggtggtgcaagtaaaggtattgcttatgaattagcaaaatttgtaaagcccaaattaactgttgcgaatagaacgatggctcgttttgaatcttggaatttaaatataaaccaaatttcattagcagatgctgaaaagtatttaggtgctgattggattgtcatcacagctggatggggattagcggttacaatgggtgtgtttgctgtcggtcaattctcaggtgcacatttaaacccagcggtgtctttagctcttgcattagacggaagttttgattggtcattagttcctggttatattgttgctcaaatgttaggtgcaattgtcggagcaacaattgtatggttaatgtacttgccacattggaaagcgacagaagaagctggcgcgaaattaggtgttttctctacagcaccggctattaagaattactttgccaactttttaagtgagattatcggaacaatggcattaactttaggtattttatttatcggtgtaaacaaaattgccgatggtttaaatcctttaattgtcggagcattaattgttgcaatcggattaagtttaggcggtgctactggttatgcaatcaacccagcacgtcgaatatttgaagatccaagtacatcatataagtattctatttcaatgacaacacgtcaaatgcgtgaaggtgaagttgatggcgtagattacttttttaaaactagggatgcgtttgaagctttaatcaaagatgaccaatttatagaatatgctgaatatgtaggcaactattatggtacaccagttcaatatgttaaagatacaatggacgaaggtcatgatgtatttttagaaattgaagtagaaggtgcaaagcaagttagaaagaaatttccagatgcgttatttattttcttagcacctccaagtttagatcacttgagagagcgattagtaggtagaggaacagaatccaatgagaaaatacaaagtcgtattaacgaagcgcgtaaagaagttgaaatgatgaatttatacgattacgttgcaacacaattacaagcaacagattatgttacaccaatcgtgttaggtgatgagactaaggttcaatctttagcgcaaaaacttgatcttgatatttctaatattgaattaattaatcctgcgacaagtgaattgaaagctgaattagttcaatcatttgttgaacgacgtaaaggtaaagcgactgaagaacaagcgcaagaattattaaacaatgtgaactacttcggtacaatgcttgtttatgctggtaaagcagatggtttagttagtggtgcagcacattcaacaggcgacactgtgcgtccagctttacaaatcatcaaaacgaaaccaggtgtatcaagaacatcaggtatcttctttatgattaaaggtgatgaacaatacatctttggtgattgtgcaatcaatccagaacttgattcacaaggacttgcagaaattgcagtagaaagtgcaaaatcagcattacacgaaacagatgaagaaattaacaaaaaagcgcacgctattttcaaacatggaatgactccaattatttgtgttggtgaaacagacgaagagcgtgaaagtggtaaagctaacgatgttgtaggtgagcaagttaagaaagctgttgcaggtttatctgaagatcaacttaaatcagttgtaattgcttatgagccaatctgggcaatcggaactggtaaatcatcaacatctgaagatgcaaatgaaatgtgtgcatttgtacgtcaaactattgctgacttatcaagcaaagaagtatcagaagcaactcgtattcaatatggtggtagtgttaaacctaacaacattaaagaatacatggcacaaactgatattgatggggcattagtaggtggcgcagcgtttaaagacgtgccagcctatgatttaggtgcgactttaatagaacatattattaaagagacgggtttgaatccaagtgagattgatgaagttatcatcggtaacgtactacaagcaggacaaggacaaaatccagcacgaattgctgctatgaaaggtggcttgccagaaacagtacctgcatttacagtgaataaagtatgtggttctgggttaaagtcgattcaattagcatatcaatctattgtgactggtgaaaatgacatcgtgctagctggcggtatggagaatatgtctcagtcaccaatgcttgtcaacaacagtcgcttcggttttaaaatgggacatcaatcaatggttgatagcatggtatatgatggtttaacagatgtatttaatcaatatcatatgggtattactgctgaaaatttagtagagcaatatggtatttcaagagaagaacaagatacatttgctgtaaactcacaacataaagcagtacgtgcacagcaa
ttattaatccaacaagctaaatcgaacagtgacacaacgccggcaatgccattggatacttgtggtgcaatgtcacagggtatgataggctattggttggaaactgaaatcaatcgcattttaactgaaatgaatagtgatagaactgtaggcacaatcgttacacgtgtggaagtagataaagatgatccacgatttgataacccaactaaaccaattggtcctttttatacgaaagaagaagttgaagaattacaaaaagaacagccagactcagtctttaaagaagatgcaggacgtggttatagaaaagtagttgcgtcaccactacctcaatctatactagaacaccagttaattcgaactttagcagacggtaaaaatattgtcattgcatgcggtggtggcggtattccagttataaaaaaagaaaatacctatgaaggtgttgaagcgaattttaattctttaggattagatgatacttatgaagctttaaatattccaattgaagattttcatttaattaaagaaattatttcgaaaaaagaattagaaggctttaatatcacaattcctcataaagaacgtatcataccgtatttagattatgttgatgaacaagcgattaatgcaggtgcagttaacactgttttgataaaagatggcaagtggatagggtataatacagatggtattggttatgttaaaggattgcacagcgtttatccagatttagaaaatgcatacattttaattttgggcgcaggtggtgcaagtaaaggtattgcttatgaattagcaaaatttgtaaagcccaaattaactgttgcgaatagaacgatggctcgttttgaatcttggaatttaaatataaaccaaatttcattagcagatgctgaaaagtatttaggtgctgattggattgtcatcacagctggatggggattagcggttacaatgggtgtgtttgctgtcggtcaattctcaggtgcacatttaaacccagcggtgtctttagctcttgcattagacggaagttttgattggtcattagttcctggttatattgttgctcaaatgttaggtgcaattgtcggagcaacaattgtatggttaatgtacttgccacattggaaagcgacagaagaagctggcgcgaaattaggtgttttctctacagcaccggctattaagaattactttgccaactttttaagtgagattatcggaacaatggcattaactttaggtattttatttatcggtgtaaacaaaattgccgatggtttaaatcctttaattgtcggagcattaattgttgcaatcggattaagtttaggcggtgctactggttatgcaatcaacccagcacgtcgaatatttgaagatccaagtacatcatataagtattctatttcaatgacaacacgtcaaatgcgtgaaggtgaagttgatggcgtagattacttttttaaaactagggatgcgtttgaagctttaatcaaagatgaccaatttatagaatatgctgaatatgtaggcaactattatggtacaccagttcaatatgttaaagatacaatggacgaaggtcatgatgtatttttagaaattgaagtagaaggtgcaaagcaagttagaaagaaatttccagatgcgctatttattttcttagcacctccaagtttagaacacttgagagagcgattagtaggtagaggaacagaatctgatgagaaaatacaaagtcgtattaacgaagcgcgtaaagaagttgaaatgatgaatttatacgattacgttgcaacacaattacaagcaacagattatgttacaccaatcgtgttaggtgatgagactaaggttcaatctttagcgcaaaaacttgatcttgatatttctaatattgaattaattaatcctgcgacaagtgaattgaaagctgaattagttcaatcatttgttgaacgacgtaaaggtaaagcgactgaagaacaagcacaagaattattaaacaatgtgaactacttcggtacaatgcttgtttatgctggtaaagcagatggtttagttagtggtgcagcacattcaacaggcgacactgtgcgtccagctttacaaatcatcaaaacgaaaccaggtgtatcaagaacatcaggtatcttctttatgattaaaggtgatgaacaatacatctttggtgattgtgcaatcaatccagaacttgattcacaaggacttgcagaaattgcagtagaaagtgcaaaatcagcattacacgaaacagatgaagaaattaacaaaaaagcgcacgctattttcaaacatggaatgactccaattatatgtgttggtgaaacagacgaagagcgtgaaagtggtaaagctaacgatgttgtaggtgagcaagttaagaaagctgttgcaggtttatctgaagatcaacttaaatcagttgtaattgcttatgaaccaatctgggcaatcggaactggtaaatcatcaacatctgaagatgcaaatgaaatgtgtgcatttgtacgtcaaactattgctgacttatcaagcaaagaagtatcagaagcaactcgtattcaatatggtggtagtgttaaacctaacaacattaaagaatacatggcacaaactgatattgatggggcattagtaggtggcgcagcgtttaaagacgtgccagcctatgatttaggtgcgactttaatagaacatattattaaagagacgggtttgaatccaagtgagattgatgaagttatcatcggtaacgtactacaagcaggacaaggacaaaatccagcacgaattgctgctatgaaaggtggcttgccagaaacagtacctgcatttacggtgaataaagtatgtggttctgggttaaagtcgattcaattagcatatcaatctattgtgactggtgaaaatgacatcgtgctagctggcggtatggagaatatgtctcaatcaccaatgcttgtcaacaacagtcgctttggttttaaaatgggacatcaatcaatggttgatagcatggtatatgatggtttaacagatgtatttaatcaatatcatatgggtattactgctgaaaatttagtagagcaatatggtatttcaagagaagaacaagatacatttgctgtaaactcacaacaaaaagcagtacgtgcacagcaa
ttattaatccaacaagctaaatcgaacagtgacacaacgccggcaatgccattggatacttgtggtgcaatgtcacagggtatgataggctattggttggaaactgaaatcaatcgcattttaactgaaatgaatagtgatagaactgtaggcacaatcgttacacgtgtggaagtagataaagatgatccacgatttgataacccaactaaaccaattggtcctttttatacgaaagaagaagttgaagaattacaaaaagaacagccagactcagtctttaaagaagatgcaggacgtggttatagaaaagtagttgcgtcaccactacctcaatctatactagaacaccagttaattcgaactttagcagacggtaaaaatattgtcattgcatgcggtggtggcggtattccagttataaaaaaagaaaatacctatgaaggtgttgaagcgaattttaattctttaggattagatgatacttatgaagctttaaatattccaattgaagattttcatttaattaaagaaattatttcgaaaaaagaattagatggctttaatatcacaattcctcataaagaacgtatcataccgtatttagatcatgttgatgaacaagcgattaatgcaggtgcagttaacactgttttgataaaagatgacaagtggatagggtataatacagatggtattggttatgttaaaggattgcacagcgtttatccagatttagaaaatgcatacattttaattttgggcgcaggtggtgcaagtaaaggcattgcttatgaattagcaaaatttgtaaagtccaaattaactgttgcgaatagaacgatggctcgttttgaatcttggaatttaaatataaaccaaatttcattagcagatgctgaaaagtatttaggtgctgattggattgtcatcacagctggatggggattagcggttacaatgggtgtgtttgctgtcggtcaattctcaggtgcacatttaaacccagcggtgtctttagctcttgcattagacggaagttttgattggtcattagttcctggttatattgttgctcaaatgttaggtgcaattgtcggagcaacaattgtatggttaatgtacttgccacattggaaagcgacagaagaagctggcgcgaaattaggtgttttctctacagcaccggctattaagaattactttgccaactttttaagtgagattatcggaacaatggcattaactttaggtattttatttatcggtgtaaacaaaattgccgatggtttaaatcctttaattgtcggagcattaattgttgcaatcggattaagtttaggcggtgctactggttatgcaatcaacccagcacgtcgaatatttgaagatccaagtacatcatataagtattctatttcaatgacaacacgtcaaatgcgtgaaggtgaagttgatggcgtagattacttttttaaaactagggatgcgtttgaagctttaatcaaagatgaccaatttatagaatatgctgaatatgtaggcaactattatggtacaccagttcaatatgttaaagatacaatggacgaaggtcatgatgtatttttagaaattgaagtagaaggtgcaaagcaagttagaaagaaatttccagatgcgctatttattttcttagcacctccaagtttagaacacttgagagagcgattagtaggtagaggaacagaatctgatgagaaaatacaaagtcgtattaacgaagcgcgtaaagaagttgaaatgatgaatttatacgattacgttgcaacacaattacaagcaacagattatgttacaccaatcgtgttaggtgatgagactaaggttcaatctttagcgcaaaaacttgatcttgatatttctaatattgaattaattaatcctgcgacaagtgaattgaaagctgaattagttcaatcatttgttgaacgacgtaaaggtaaagcgactgaagaacaagcacaagaattattaaacaatgtgaactacttcggtacaatgcttgtttatgctggtaaagcagatggtttagttagtggtgcagcacattcaacaggagacactgtgcgtccagctttacaaatcatcaaaacgaaaccaggtgtatcaagaacatcaggtatcttctttatgattaaaggtgatgtacaatacatctttggtgattgtgcaatcaatccagaacttgattcacaaggacttgcagaaattgcagtagaaagtgcaaaatcagcattacacgaaacagatgaagaaattaacaaaaaagcgcacgctattttcaaacatggaatgactccaattatttgtgttggtgaaacagacgaagagcgtgaaagtggtaaagctaacgatgttgtaggtgagcaagttaagaaagctgttgcaggtttatctgaagatcaacttaaatcagttgtaattgcttatgagccaatctgggcaatcggaactggtaaatcatcaacatctgaagatgcaaatgaaatgtgtgcatttgtacgtcaaactattgctgacttatcaagcaaagaagtatcagaagcaactcgtattcaatatggtggtagtgttaaacctaacaacattaaagaatacatggcacaaactgatattgatggggcattagtaggtggcgcagcgtttaaagacgtgccagcctatgatttaggtgcgactttaatagaacatattattaaagagacgggtttgaatccaagtgagattgatgaagttatcatcggtaacgtactacaagcaggacaaggacaaaatccagcacgaattgctgctatgaaaggtggcttgccagaaacagtacctgcatttacagtgaataaagtatgtggttctgggttaaagtcgattcaattagcatatcaatctattgtgactggtgaaaatgacatcgtgctagctggcggtatggagaatatgtctcagtcaccaatgcttgtcaacaacagtcgcttcggttttaaaatgggacatcaatcaatggttgatagcatggtatatgatggtttaacagatgtatttaatcaatatcatatgggtattactgctgaaaatttagtagagcaatatggtatttcaagagaagaacaagatacatttgctgtaaactcacaacaaaaagcagtacgtgcacagcaa
ttattaatccaacaagctaaatcgaacagtgacacaacgccggcaatgccattggatacttgtggtgcaatgtcacagggtatgataggctattggttggaaactgaaatcaatcgcattttaactgaaatgaatagtgatagaactgtaggcacaatcgttacacgtgtggaagtagataaagatgatccacgatttgataacccaactaaaccaattggtcctttttatacgaaagaagaagttgaagaattacaaaaagaacagccagactcagtatttaaagaagatgcaggacgtggttatagaaaagtagttgcgtcaccactacctcaatctatactagaacaccagttaattcgaactttagcagacggtaaaaatattgtcattgcatgcggtggtggcggtattccagttataaaaaaagaaaatacctatgaaggtgttgaagcgaattttaattctttaggattagataatacttatgaagctttaaatattccaattgaagattttcatttaattaaagaaattatttcaaaaaaagaattagatggctttaatatcacaattccccataaagaacgtatcataccgtatttagattatgttgatgaacaagcgattaatgcaggtgcagttaacactgttttgataaaagatggcaagtggatagggtataatacagatggtatcggttatgttaaaggattgcacagcgtttatccagatttagaaaatgcatacattttaattttgggcgcaggtggtgcaagtaaaggtattgcttatgaattagcaaaatttgtaaagcccaaattaactgttgcgaatagaacgatggctcgttttgaatcttggaatttaaatataaaccaaatttcattggcagatgctgaaaagtatttaggtgctgattggattgtcatcacagctggatggggattagcggttacaatgggtgtgtatgctgtcggtcaattctcaggtgcacatttaaacccagcggtgtctttagctcttgcattagacggaagttttgattggtcattagttcctggttatattgttgctcaaatgttaggtgcaattgtcggagcaacgattgtatggttaatgtacttgccacattggaaagcgacagaagaagctggcgcgaaattaggtgttttttctacagcaccggctattaagaattactttgccaactttttaagtgagattatcggaacaatggcattaactttaggtattttatttatcggtgtaaacaaaattgccgatggtttaaatcctttaattgtcggagcattaattgttgcaatcggattaagtttaggcggtgctactggttatgcaatcaacccagcacgtcgaatatttgaagatccaagtacatcatataagtattctatttcaatgacaacacgtcaaatgcgtgaaggtgaagttgatggcgtagattacttttttaaaactagggatgcgtttgaagctttaattaaagatgaccaatttatagaatatgctgaatatgtaggcaactattatggtacaccagttcaatatgttaaagatacaatggacgaaggtcatgatgtatttttagaaattgaagtagaaggtgcaaagcaagttagaaagaaatttccagatgcgttatttattttcttagcacctccaagtttagatcacttgagagagcgattagtaggtagaggaacagaatctgatgagaaaatacaaagtcgtattaacgaagcacgtaaagaagtcgaaatgatgaatttatacgattacgttgcaacacaattacaagcaacagattatgttacaccaatcgtgttaggtgatgagactaaggttcaatctttagcgcaaaaacttaatcttgatatttctaatattgaattaattaatcctgcgacaagtgaattgaaagctgaattagttcaatcatttgttgaacgacgtaaagggaaagcgactgaagaacaagcacaagaattattaaacaatgtgaactacttcggtacaatgcttgtttatgctggtaaagcagatggtctagttagtggtgcagcacattcaacaggcgacactgtgcgtccagctttacaaaccatcaaaacgaaaccaggtgtatcaagaacatcaggtatcttctttatgattaaaggtgatgaacaatacatctttggtgattgtgcaatcaatccagaacttgattcacaaggacttgcagaaattgcagtagaaagtgcaaaatcagcattacacgaaacagatgaagaaattaacaaaaaagcgcatgctattttcaaacatggtatgacaccaattatttgtgttggtgaaacagacgaagaacgtgaaagtggtaaagctaacgatgttgtaggtgagcaagttaagaaagctgttgcaggtttatctgaagagcaacttaaatcagttgtaattgcttatgaaccaatctgggcaatcggaactggtaaatcatcaacatctgaagatgcgaatgaaatgtgtgcatttgtacgtcaaactatttctgacttatcaagcaaagaagtatcagaagcaactcgtattcaatatggtggtagtgttaaacctaacaacattaaagaatacatggcacaaactgatattgatggggcattagtaggtggcgcagcgtttaaagacgtgccagcctatgatttaggtgcgactttaatagaacatattattaaagagacgggtttgaatccaagtgagattaatgaagtcatcatcggtaacgtactacaagcaggacaaggacaaaatccagcacgaattgctgctatgaaaggtggcttgccagaaacagtacctgcatttacagtgaataaagtatgtggttctgggttaaagtcgattcaattagcatatcaatctattgtgactggtgaaaatgacatcgtgctagctggcggtatggagaatatgtctcaatcaccaatgcttgtcaacaacagtcgctttggttttaaaatgggacatcaatcaatggttgatagcatggtatatgatggtttaacagatgtatttaatcaatatcatatgggtattactgctgaaaatttagtagaacaatatggtatttcaagagaagaacaagatacatttgctgtaaactcacaacaaaaagcagtacgtgcacagcaa
ttattaatccaacaagctaaatcgaacagtgacacaacgccggcaatgccattggatacttgtggtgcaatgtcacagggtatgataggctattggttggaaactgaaatcaatcgcattttaactgaaatgaatagtgatagaactgtaggcacaatcgttacacgtgtggaagtagataaagatgatccacgatttgataacccaactaaaccaattggtcctttttatacgaaagaagaagttgaagaattacaaaaagaacagccagactcagtctttaaagaagatgcaggacgtggttatagaaaagtagttgcgtcaccactacctcaatctatactagaacaccagttaattcgaactttagcagacggtaaaaatattgtcattgcatgcggtggtggcggtattccagttataaaaaaagaaaatacctatgaaggtgttgaagcgaattttaattctttaggattagatgatacttatgaagctttaaatattccaattgaagattttcatttaattaaagaaattatttcgaaaaaagaattagaaggctttaatatcacaattcctcataaagaacgtatcataccgtatttagattatgttgatgaacaagcgattaatgcaggtgcagttaacactgttttgataaaagatggcaagtggatagggtataatacagatggtattggttatgttaaaggattgcacagcgtttatccagatttagaaaatgcatacattttaattttgggcgcaggtggtgcaagtaaaggtattgcttatgaattagcaaaatttgtaaagcccaaattaactgttgcgaatagaacgatggctcgttttgaatcttggaatttaaatataaaccaaatttcattagcagatgctgaaaagtatttaggtgctgattggattgtcatcacagctggatggggattagcggttacaatgggtgtgtttgctgtcggtcaattctcaggtgcacatttaaacccagcggtgtctttagctcttgcattagacggaagttttgattggtcattagttcctggttatattgttgctcaaatgttaggtgcaattgtcggagcaacaattgtatggttaatgtacttgccacattggaaagcgacagaagaagctggcgcgaaattaggtgttttctctacagcaccggctattaagaattactttgccaactttttaagtgagattatcggaacaatggcattaactttaggtattttatttatcggtgtaaacaaaattgccgatggtttaaatcctttaattgtcggagcattaattgttgcaatcggattaagtttaggcggtgctactggttatgcaatcaacccagcacgtcgaatatttgaagatccaagtacatcatataagtattctatttcaatgacaacacgtcaaatgcgtgaaggtgaagttgatggcgtagattacttttttaaaactagggatgcgtttgaagctttaatcaaagatgaccaatttatagaatatgctgaatatgtaggcaactattatggtacaccagttcaatatgttaaagatacaatggacgaaggtcatgatgtatttttagaaattgaagtagaaggtgcaaagcaagttagaaagaaatttccagatgcgctatttattttcttagcacctccaagtttagaacacttgagagagcgattagtaggtagaggaacagaatctgatgagaaaatacaaagtcgtattaacgaagcgcgtaaagaagttgaaatgatgaatttatacgattacgttgcaacacaattacaagcaacagattatgttacaccaatcgtgttaggtgatgagactaaggttcaatctttagcgcaaaaacttgatcttgatatttctaatattgaattaattaatcctgcgacaagtgaattgaaagctgaattagttcaatcatttgttgaacgacgtaaaggtaaagcgactgaagaacaagcacaagaattattaaacaatgtgaactacttcggtacaatgcttgtttatgctggtaaagcagatggtttagttagtggtgcagcacattcaacaggagacactgtgcgtccagctttacaaatcatcaaaacgaaaccaggtgtatcaagaacatcaggtatcttctttatgattaaaggtgatgtacaatacatctttggtgattgtgcaatcaatccagaacttgattcacaaggacttgcagaaattgcagtagaaagtgcaaaatcagcattacacgaaacagatgaagaaattaacaaaaaagcgcacgctattttcaaacatggaatgactccaattatttgtgttggtgaaacagacgaagagcgtgaaagtggtaaagctaacgatgttgtaggtgagcaagttaagaaagctgttgcaggtttatctgaagatcaacttaaatcagttgtaattgcttatgagccaatctgggcaatcggaactggtaaatcatcaacatctgaagatgcaaatgaaatgtgtgcatttgtacgtcaaactattgctgacttatcaagcaaagaagtatcagaagcaactcgtattcaatatggtggtagtgttaaacctaacaacattaaagaatacatggcacaaactgatattgatggggcattagtaggtggcgcagcgtttaaagacgtgccagcctatgatttaggtgcgactttaatagaacatattattaaagagacgggtttgaatccaagtgagattgatgaagttatcatcggtaacgtactacaagcaggacaaggacaaaatccagcacgaattgctgctatgaaaggtggcttgccagaaacagtacctgcatttacagtgaataaagtatgtggttctgggttaaagtcgattcaattagcatatcaatctattgtgactggtgaaaatgacatcgtgctagctggcggtatggagaatatgtctcagtcaccaatgcttgtcaacaacagtcgcttcggttttaaaatgggacatcaatcaatggttgatagcatggtatatgatggtttaacagatgtatttaatcaatatcatatgggtattactgctgaaaatttagtagagcaatatggtatttcaagagaagaacaagatacatttgctgtaaactcacaacataaagcagtacgtgcacagcaa
ttattaatccaacaagctaaatcgaacagtgacacaacgccggcaatgccattggatacttgtggtgcaatgtcacagggtatgataggctattggttggaaactgaaatcaatcgcattttaactgaaatgaatagtgatagaactgtaggcacaatcgttacacgtgtggaagtagataaagatgatccacgatttgataacccaactaaaccaattggtcctttttatacgaaagaagaagttgaagaattacaaaaagaacagccagactcagtctttaaagaagatgcaggacgtggttatagaaaagtagttgcgtcaccactacctcaatctatactagaacaccagttaattcgaactttagcagacggtaaaaatattgtcattgcatgcggtggtggcggtattccagttataaaaaaagaaaatacctatgaaggtgttgaagcgaattttaattctttaggattagatgatacttatgaagctttaaatattccaattgaagattttcatttaattaaagaaattatttcgaaaaaagaattagaaggctttaatatcacaattcctcataaagaacgtatcataccgtatttagattatgttgatgaacaagcgattaatgcaggtgcagttaacactgttttgataaaagatggcaagtggatagggtataatacagatggtattggttatgttaaaggattgcacagcgtttatccagatttagaaaatgcatacattttaattttgggcgcaggtggtgcaagtaaaggtattgcttatgaattagcaaaatttgtaaagcccaaattaactgttgcgaatagaacgatggctcgttttgaatcttggaatttaaatataaaccaaatttcattagcagatgctgaaaagtatttaggtgctgattggattgtcatcacagctggatggggattagcggttacaatgggtgtgtttgctgtcggtcaattctcaggtgcacatttaaacccagcggtgtctttagctcttgcattagacggaagttttgattggtcattagttcctggttatattgttgctcaaatgttaggtgcaattgtcggagcaacaattgtatggttaatgtacttgccacattggaaagcgacagaagaagctggcgcgaaattaggtgttttctctacagcaccggctattaagaattactttgccaactttttaagtgagattatcggaacaatggcattaactttaggtattttatttatcggtgtaaacaaaattgccgatggtttaaatcctttaattgtcggagcattaattgttgcaatcggattaagtttaggcggtgctactggttatgcaatcaacccagcacgtcgaatatttgaagatccaagtacatcatataagtattctatttcaatgacaacacgtcaaatgcgtgaaggtgaagttgatggcgtagattacttttttaaaactagggatgcgtttgaagctttaatcaaagatgaccaatttatagaatatgctgaatatgtaggcaactattatggtacaccagttcaatatgttaaagatacaatggacgaaggtcatgatgtatttttagaaattgaagtagaaggtgcaaagcaagttagaaagaaatttccagatgcgctatttattttcttagcacctccaagtttagaacacttgagagagcgattagtaggtagaggaacagaatctgatgagaaaatacaaagtcgtattaacgaagcgcgtaaagaagttgaaatgatgaatttatacgattacgttgcaacacaattacaagcaacagattatgttacaccaatcgtgttaggtgatgagactaaggttcaatctttagcgcaaaaacttgatcttgatatttctaatattgaattaattaatcctgcgacaagtgaattgaaagctgaattagttcaatcatttgttgaacgacgtaaaggtaaagcgactgaagaacaagcacaagaattattaaacaatgtgaactacttcggtacaatgcttgtttatgctggtaaagcagatggtttagttagtggtgcagcacattcaacaggcgacactgtgcgtccagctttacaaatcatcaaaacgaaaccaggtgtatcaagaacatcaggtatcttctttatgattaaaggtgatgaacaatacatctttggtgattgtgcaatcaatccagaacttgattcacaaggacttgcagaaattgcagtagaaagtgcaaaatcagcattacacgaaacagatgaagaaattaacaaaaaagcgcacgctattttcaaacatggaatgactccaattatatgtgttggtgaaacagacgaagagcgtgaaagtggtaaagctaacgatgttgtaggtgagcaagttaagaaagctgttgcaggtttatctgaagatcaacttaaatcagttgtaattgcttatgaaccaatctgggcaatcggaactggtaaatcatcaacatctgaagatgcaaatgaaatgtgtgcatttgtacgtcaaactattgctgacttatcaagcaaagaagtatcagaagcaactcgtattcaatatggtggtagtgttaaacctaacaacattaaagaatacatggcacaaactgatattgatggggcattagtaggtggcgcagcgtttaaagacgtgccagcctatgatttaggtgcgactttaatagaacatattattaaagagacgggtttgaatccaagtgagattgatgaagttatcatcggtaacgtactacaagcaggacaaggacaaaatccagcacgaattgctgctatgaaaggtggcttgccagaaacagtacctgcatttacggtgaataaagtatgtggttctgggttaaaatcgattcaattagcatatcaatctattgtgactggtgaaaatgacatcgtgctagctggcggtatggagaatatgtctcaatcaccaatgcttgtcaacaacagtcgctttggttttaaaatgggacatcaatcaatggttgatagcatggtatatgatggtttaacagatgtatttaatcaatatcatatgggtattactgctgaaaatttagtagagcaatatggtatttcaagagaagaacaagatacatttgctgtaaactcacaacaaaaagcagtacgtgcacagcaa
ttattaatccaacaagctaaatcgaacagtgacacaacgccggcaatgccattggatacttgtggtgcaatgtcacagggtatgataggctattggttggaaactgaaatcaatcgcattttaactgaaatgaatagtgatagaactgtaggcacaatcgttacacgtgtggaagtagataaagatgatccacgatttgataacccaactaaaccaattggtcctttttatacgaaagaagaagttgaagaattacaaaaagaacagccagactcagtatttaaagaagatgcaggacgtggttatagaaaagtagttgcgtcaccactacctcagtctatactagaacaccagttaattcgaactttagcagacggtaaaaatattgtcattgcatgcggtggtggcggtattccagttataaaaaaagaaaatacctatgaaggtgttgaagcgaattttaattctttaggattagataatacttatgaagctttaaatattccaattgaagattttcatttaattaaagaaattatttcaaaaaaagaattagatggctttaatatcacaattccccataaagaacgtatcataccgtatttagattatgttgatgaacaagcgattaatgcaggtgcagttaacactgttttgataaaagatggcaagtggatagggtataatacagatggtatcggttatgttaaaggattgcacagcgtttatccagatttagaaaatgcatacattttaattttgggcgcaggtggtgcaagtaaaggtattgcttatgaattagcaaaatttgtaaagcccaaattaactgttgcgaatagaacgatggctcgttttgaatcttggaatttaaatataaaccaaatttcattggcagatgctgaaaagtatttaggtgctgattggattgtcatcacagctggatggggattagcggttacaatgggtgtgtatgctgtcggtcaattctcaggtgcacatttaaacccagcggtgtctttagctcttgcattagacggaagttttgattggtcattagttcctggttatattgttgctcaaatgttaggtgcaattgtcggagcaacgattgtatggttaatgtacttgccacattggaaagcgacagaagaagctggcgcgaaattaggtgttttttctacagcaccggctattaagaattactttgccaactttttaagtgagattatcggaacaatggcattaactttaggtattttatttatcggtgtaaacaaaattgccgatggtttaaatcctttaattgtcggagcattaattgttgcaatcggattaagtttaggcggtgctactggttatgcaatcaacccagcacgtcgaatatttgaagatccaagtacatcatataagtattctatttcaatgacaacacgtcaaatgcgtgaaggtgaagttgatggcgtagattacttttttaaaactagggatgcgtttgaagctttaattaaagatgaccaatttatagaatatgctgaatatgtaggcaactattatggtacaccagttcaatatgttaaagatacaatggacgaaggtcatgatgtatttttagaaattgaagtagaaggtgcaaagcaagttagaaagaaatttccagatgcgttatttattttcttagcacctccaagtttagatcacttgagagagcgattagtaggtagaggaacagaatctgatgagaaaatacaaagtcgtattaacgaagcacgtaaagaagtcgaaatgatgaatttatacgattacgttgcaacacaattacaagcaacagattatgttacaccaatcgtgttaggtgatgagactaaggttcaatctttagcgcaaaaacttaatcttgatatttctaatattgaattaattaatcctgcgacaagtgaattgaaagctgaattagttcaatcatttgttgaacgacgtaaagggaaagcgactgaagaacaagcacaagaattattaaacaatgtgaactacttcggtacaatgcttgtttatgctggtaaagcagatggtctagttagtggtgcagcacattcaacaggcgacactgtgcgtccagctttacaaatcatcaaaacgaaaccaggtgtatcaagaacatcaggtatcttctttatgattaaaggtgatgaacaatacatctttggtgattgtgcaatcaatccagaacttgattcacaaggacttgcagaaattgcagtagaaagtgcaaaatcagcattacacgaaacagatgaagaaattaacaaaaaagcgcatgctattttcaaacatggtatgacaccaattatttgtgttggtgaaacagacgaagaacgtgaaagtggtaaagctaacgatgttgtaggtgagcaagttaagaaagctgttgcaggtttatctgaagagcaacttaaatcagttgtaattgcttatgaaccaatctgggcaatcggaactggtaaatcatcaacatctgaagatgcgaatgaaatgtgtgcatttgtacgtcaaactatttctgacttatcaagcaaagaagtatcagaagcaactcgtattcaatatggtggtagtgttaaacctaacaacattaaagaatacatggcacaaactgatattgatggggcattagtaggtggcgcagcgtttaaagacgtgccagcctatgatttaggtgcgactttaatagaacatattattaaagagacgggtttgaatccaagtgagattaatgaagtcatcatcggtaacgtactacaagcaggacaaggacaaaatccagcacgaattgctgctatgaaaggtggcttgccagaaacagtacctgcatttacagtgaataaagtatgtggttctgggttaaagtcgattcaattagcatatcaatctattgtgactggtgaaaatgacatcgtgctagctggcggtatggagaatatgtctcaatcaccaatgcttgtcaacaacagtcgctttggttttaaaatgggacatcaatcaatggttgatagcatggtatatgatggtttaacagatgtatttaatcaatatcatatgggtattactgctgaaaatttagtagaacaatatggtatttcaagagaagaacaagatacatttgctgtaaactcacaacaaaaagcagtacgtgcacagcaa
ttattaatccaacaagctaaatcgaacagtgacacaacgccggcaatgccattggatacttgtggtgcaatgtcacagggtatgataggctattggttggaaactgaaatcaatcgcattttaactgaaatgaatagtgatagaactgtaggcacaatcgttacacgtgtggaagtagataaagatgatccacgatttgataacccaactaaaccaattggtcctttttatacgaaagaagaagttgaagaattacaaaaagaacagccagactcagtctttaaagaagatgcaggacgtggttatagaaaagtagttgcgtcaccactacctcaatctatactagaacaccagttaattcgaactttagcagacggtaaaaatattgtcattgcatgcggtggtggcggtattccagttataaaaaaagaaaatacctatgaaggtgttgaagcgaattttaattctttaggattagatgatacttatgaagctttaaatattccaattgaagattttcatttaattaaagaaattatttcgaaaaaagaattagatggctttaatatcacaattcctcataaagaacgtatcataccgtatttagatcatgttgatgaacaagcgattaatgcaggtgcagttaacactgttttgataaaagatgacaagtggatagggtataatacagatggtattggttatgttaaaggattgcacagcgtttatccagatttagaaaatgcatacattttaattttgggcgcaggtggtgcaagtaaaggtattgcttatgaattagcaaaatttgtaaagcccaaattaactgttgcgaatagaacgatggctcgttttgaatcttggaatttaaatataaaccaaatttcattagcagatgctgaaaagtatttaggtgctgattggattgtcatcacagctggatggggattagcggttacaatgggtgtgtttgctgtcggtcaattctcaggtgcacatttaaacccagcggtgtctttagctcttgcattagacggaagttttgattggtcattagttcctggttatattgttgctcaaatgttaggtgcaattgtcggagcaaaaattgtatggttaatgtacttgccacattggaaagcgacagaagaagctggcgcgaaattaggtgttttctctacagcaccggctattaagaattactttgccaactttttaagtgagattatcggaacaatggcattaactttaggtattttatttatcggtgtaaacaaaattgccgatggtttaaatcctttaattgtcggagcattaattgttgcaatcggattaagtttaggcggtgctactggttatgcaatcaacccagcacgtcgaatatttgaagatccaagtacatcatataagtattctatttcaatgacaacacgtcaaatgcgtgaaggtgaagttgatggcgtagattacttttttaaaactagggatgcgtttgaagctttaatcaaagatgaccaatttatagaatatgctgaatatgtaggcaactattatggtacaccagttcaatatgttaaagatacaatggacgaaggtcatgatgtatttttagaaattgaagtagaaggtgcaaagcaagttagaaagaaatttccagatgcgctatttattttcttagcacctccaagtttagaacacttgagagagcgattagtaggtagaggaacagaatctgatgagaaaatacaaagtcgtattaacgaagcgcgtaaagaagttgaaatgatgaatttatacgattacgttgcaacacaattacaagcaacagattatgttacaccaatcgtgttaggtgatgagactaaggttcaatctttagcgcaaaaacttgatcttgatatttctaatattgaattaattaatcctgcgacaagtgaattgaaagctgaattagttcaatcatttgttgaacgacgtaaaggtaaagcgactgaagaacaagcacaagaattattaaacaatgtgaactacttcggtacaatgcttgtttatgctggtaaagcagatggtttagttagtggtgcagcacattcaacaggagacactgtgcgtccagctttacaaatcatcaaaacgaaaccaggtgtatcaagaacatcaggtatcttctttatgattaaaggtgatgtacaatacatctttggtgattgtgcaatcaatccagaacttgattcacaaggacttgcagaaattgcagtagaaagtgcaaaatcagcattacacgaaacagatgaagaaattaacaaaaaagcgcacgctattttcaaacatggaatgactccaattatatgtgttggtgaaacagacgaagagcgtgaaagtggtaaagctaacgatgttgtaggtgagcaagttaagaaagctgttgcaggtttatctgaaaatcaactaaaatcagttgtaattgcttatgaaccaatctgggcaatcggaactggtaaatcatcaacatctgaagatgcgaatgaaatgtgtgcatttgtacgtcaaactattgctgacttatcaagcaaagaagtatcagaagcaactcgtattcaatatggtggtagtgttaaacctaacaacattaaagaatacatggcacaaactgatattgatggggcattagtaggtggcgcagcgtttaaagacgtgccagcctatgatttaggtgcgactttaatagaacatattattaaagagacgggtttgaatccaagtgagattgatgaagttatcatcggtaacgtactacaagcaggacaaggacaaaatccagcacgaattgctgctatgaaaggtggcttgccagaaacagtacctgcatttacggtgaataaagtatgtggttctgggttaaagtcgattcaattagcatatcaatctattgtgactggtgaaaatgacatcgtgctagctggcggtatggagaatatgtctcaatcaccaatgcttgtcaacaacagtcgctttggttttaaaatgggacatcaatcaatggttgatagcatggtatatgatggtttaacagatgtatttaatcaatatcatatgggtattactgctgaaaatttagtagagcaatatggtatttcaagagaagaacaagatacatttgctgtaaactcacaacaaaaagcagtacgtgcacagcaa
ttattaatccaacaagctaaatcgaacagtgacacaacgccggcaatgccattggatacttgtggtgcaatgtcacagggtatgataggctattggttggaaactgaaatcaatcgcattttaactgaaatgaatagtgatagaactgtaggcacaatcgttacacgtgtggaagtagataaagatgatccacgatttgataacccaactaaaccaattggtcctttttatacgaaagaagaagttgaagaattacaaaaagaacagccagactcagtctttaaagaagatgcaggacgtggttatagaaaagtagttgcgtcaccactacctcaatctatactagaacaccagttaattcgaactttagcagacggtaaaaatattgtcattgcatgcggtggtggcggtattccagttataaaaaaagaaaatacctatgaaggtgttgaagcgaattttaattctttaggattagatgatacttatgaagctttaaatattccaattgaagattttcatttaattaaagaaattatttcgaaaaaagaattagatggctttaatatcacaattcctcataaagaacgtatcataccgtatttagatcatgttgatgaacaagcgattaatgcaggtgcagttaacactgttttgataaaagatgacaagtggatagggtataatacagatggtattggttatgttaaaggattgcacagcgtttatccagatttagaaaatgcatacattttaattttgggcgcaggtggtgcaagtaaaggtattgcttatgaattagcaaaatttgtaaagcccaaattaactgttgcgaatagaacgatggctcgttttgaatcttggaatttaaatataaaccaaatttcattagcagatgctgaaaagtatttaggtgctgattggattgtcatcacagctggatggggattagcggttacaatgggtgtgtttgctgtcggtcaattctcaggtgcacatttaaacccagcggtgtctttagctcttgcattagacggaagttttgattggtcattagttcctggttatattgttgctcaaatgttaggtgcaattgtcggagcaacaattgtatggttaatgtacttgccacattggaaagcgacagaagaagctggcgcgaaattaggtgttttctctacagcaccggctattaagaattactttgccaactttttaagtgagattatcggaacaatggcattaactttaggtattttatttatcggtgtaaacaaaattgccgatggtttaaatcctttaattgtcggagcattaattgttgcaatcggattaagtttaggcggtgctactggttatgcaatcaacccagcacgtcgaatatttgaagatccaagtacatcatataagtattctatttcaatgacaacacgtcaaatgcgtgaaggtgaagttgatggcgtagattacttttttaaaactagggatgcgtttgaagctttaatcaaagatgaccaatttatagaatatgctgaatatgtaggcaactattatggtacaccagttcaatatgttaaagatacaatggacgaaggtcatgatgtatttttagaaattgaagtagaaggtgcaaagcaagttagaaagaaatttccagatgcgctatttattttcttagcacctccaagtttagaacacttgagagagcgattagtaggtagaggaacagaatctgatgagaaaatacaaagtcgtattaacgaagcgcgtaaagaagttgaaatgatgaatttatacgattacgttgcaacacaattacaagcaacagattatgttacaccaatcgtgttaggtgatgagactaaggttcaatctttagcgcaaaaacttgatcttgatatttctaatattgaattaattaatcctgcgacaagtgaattgaaagctgaattagttcaatcatttgttgaacgacgtaaaggtaaagcgactgaagaacaagcacaagaattattaaacaatgtgaactacttcggtacaatgcttgtttatgctggtaaagcagatggtttagttagtggtgcagcacattcaacaggagacactgtgcgtccagctttacaaatcatcaaaacgaaaccaggtgtatcaagaacatcaggtatcttctttatgattaaaggtgatgtacaatacatctttggtgattgtgcaatcaatccagaacttgattcacaaggacttgcagaaattgcagtagaaagtgcaaaatcagcattacacgaaacagatgaagaaattaacaaaaaagcgcacgctattttcaaacatggaatgactccaattatatgtgttggtgaaacagacgaagagcgtgaaagtggtaaagctaacgatgttgtaggtgagcaagttaagaaagctgttgcaggtttatctgaaaatcaactaaaatcagttgtaattgcttatgaaccaatctgggcaatcggaactggtaaatcatcaacatctgaagatgcgaatgaaatgtgtgcatttgtacgtcaaactattgctgacttatcaagcaaagaagtatcagaagcaactcgtattcaatatggtggtagtgttaaacctaacaacattaaagaatacatggcacaaactgatattgatggggcattagtaggtggcgcagcgtttaaagacgtgccagcctatgatttaggtgcgactttaatagaacatattattaaagagacgggtttgaatccaagtgagattgatgaagttatcatcggtaacgtactacaagcaggacaaggacaaaatccagcacgaattgctgctatgaaaggtggcttgccagaaacagtacctgcatttacggtgaataaagtatgtggttctgggttaaagtcgattcaattagcatatcaatctattgtgactggtgaaaatgacatcgtgctagctggcggtatggagaatatgtctcaatcaccaatgcttgtcaacaacagtcgctttggttttaaaatgggacatcaatcaatggttgatagcatggtatatgatggtttaacagatgtatttaatcaatatcatatgggtattactgctgaaaatttagtagagcaatatggtatttcaagagaagaacaagatacatttgctgtaaactcacaacaaaaagcagtacgtgcacagcaa
ttattaatccaacaagctaaatcgaacagtgacacaacgccggcaatgccattggatacttgtggtgcaatgtcacagggtatgataggctattggttggaaactgaaatcaatcgcattttaactgaaatgaatagtgatagaactgtaggcacaatcgttacacgtgtggaagtagataaagatgatccacgatttgataacccaactaaaccaattggtcctttttatacgaaagaagaagttgaagaattacaaaaagaacagccagactcagtctttaaagaagatgcaggacgtggttatagaaaagtagttgcgtcaccactacctcaatctatactagaacaccagttaattcgaactttagcagacggtaaaaatattgtcattgcatgcggtggtggcggtattccagttataaaaaaagaaaatacctatgaaggtgttgaagcgaattttaattctttaggattagatgatacttatgaagctttaaatattccaattgaagattttcatttaattaaagaaattatttcgaaaaaagaattagaaggctttaatatcacaattcctcataaagaacgtatcataccgtatttagattatgttgatgaacaagcgattaatgcaggtgcagttaacactgttttgataaaagatggcaagtggatagggtataatacagatggtattggttatgttaaaggattgcacagcgtttatccagatttagaaaatgcatacattttaattttgggcgcaggtggtgcaagtaaaggtattgcttatgaattagcaaaatttgtaaagcccaaattaactgttgcgaatagaacgatggctcgttttgaatcttggaatttaaatataaaccaaatttcattagcagatgctgaaaagtatttaggtgctgattggattgtcatcacagctggatggggattagcggttacaatgggtgtgtttgctgtcggtcaattctcaggtgcacatttaaacccagcggtgtctttagctcttgcattagacggaagttttgattggtcattagttcctggttatattgttgctcaaatgttaggtgcaattgtcggagcaacaattgtatggttaatgtacttgccacattggaaagcgacagaagaagctggcgcgaaattaggtgttttctctacagcaccggctattaagaattactttgccaactttttaagtgagattatcggaacaatggcattaactttaggtattttatttatcggtgtaaacaaaattgccgatggtttaaatcctttaattgtcggagcattaattgttgcaatcggattaagtttaggcggtgctactggttatgcaatcaacccagcacgtcgaatatttgaagatccaagtacatcatataagtattctatttcaatgacaacacgtcaaatgcgtgaaggtgaagttgatggcgtagattacttttttaaaactagggatgcgtttgaagctttaatcaaagatgaccaatttatagaatatgctgaatatgtaggcaactattatggtacaccagttcaatatgttaaagatacaatggacgaaggtcatgatgtatttttagaaattgaagtagaaggtgcaaagcaagttagaaagaaatttccagatgcgctatttattttcttagcacctccaagtttagaacacttgagagagcgattagtaggtagaggaacagaatctgatgagaaaatacaaagtcgtattaacgaagcgcgtaaagaagttgaaatgatgaatttatacgattacgttgcaacacaattacaagcaacagattatgttacaccaatcgtgttaggtgatgagactaaggttcaatctttagcgcaaaaacttgatcttgatatttctaatattgaattaattaatcctgcgacaagtgaattgaaagctgaattagttcaatcatttgttgaacgacgtaaaggtaaagcgactgaagaacaagcacaagaattattaaacaatgtgaactacttcggtacaatgcttgtttatgctggtaaagcagatggtttagttagtggtgcagcacattcaacaggcgacactgtgcgtccagctttacaaatcatcaaaacgaaaccaggtgtatcaagaacatcaggtatcttctttatgattaaaggtgatgaacaatacatctttggtgattgtgcaatcaatccagaacttgattcacaaggacttgcagaaattgcagtagaaagtgcaaaatcagcattacacgaaacagatgaagaaattaacaaaaaagcgcacgctattttcaaacatggaatgactccaattatttgtgttggtgaaacagacgaagagcgtgaaagtggtaaagctaacgatgttgtaggtgagcaagttaagaaagctgttgcaggtttatctgaagatcaacttaaatcagttgtaattgcttatgaaccaatctgggcaatcggaactggtaaatcatcaacatctgaagatgcaaatgaaatgtgtgcatttgtacgtcaaactattgctgacttatcaagcaaagaagtatcagaagcaactcgtattcaatatggtggtagtgttaaacctaacaacattaaagaatacatggcacaaactgatattgatggggcattagtaggtggcgcagcgtttaaagacgtgccagcctatgatttaggtgcgactttaatagaacatattattaaagagacgggtttgaatccaagtgagattgatgaagttatcatcggtaacgtactacaagcaggacaaggacaaaatccagcacgaattgctgctatgaaaggtggcttgccagaaacagtacctgcatttacggtgaataaagtatgtggttctgggttaaagtcgattcaattagcatatcaatctattgtgactggtgaaaatgacatcgtgctagctggcggtatggagaatatgtctcaatcaccaatgcttgtcaacaacagtcgctttggttttaaaatgggacatcaatcaatggttgatagcatggtatatgatggtttaacagatgtatttaatcaatatcatatgggtattactgctgaaaatttagcagagcaatatggtatttcaagagaagaacaagatacatttgctgtaaactcacaacaaaaagcagtacgtgcacagcaa
ttattaatccaacaagctaaatcgaacagtgacacaacgccggcaatgccattggatacttgtggtgcaatgtcacagggtatgataggctattggttggaaactgaaatcaatcgcattttaactgaaatgaatagtgatagaactgtaggcacaatcgttacacgtgtggaagtagataaagatgatccacgatttgataacccaactaaaccaattggtcctttttatacgaaagaagaagttgaagaattacaaaaagaacagccagactcagtctttaaagaagatgcaggacgtggttatagaaaagtagttgcgtcaccactacctcaatctatactagaacaccagttaattcgaactttagcagacggtaaaaatattgtcattgcatgcggtggtggcggtattccagttataaaaaaagaaaatacctatgaaggtgttgaagcgaattttaattctttaggattagatgatacttatgaagctttaaatattccaattgaagattttcatttaattaaagaaattatttcgaaaaaagaattagaaggctttaatatcacaattcctcataaagaacgtatcataccgtatttagattatgttgatgaacaagcgattaatgcaggtgcagttaacactgttttgataaaagatggcaagtggatagggtataatacagatggtattggttatgttaaaggattgcacagcgtttatccagatttagaaaatgcatacattttaattttgggcgcaggtggtgcaagtaaaggtattgcttatgaattagcaaaatttgtaaagcccaaattaactgttgcgaatagaacgatggctcgttttgaatcttggaatttaaatataaaccaaatttcattagcagatgctgaaaagtatttaggtgctgattggattgtcatcacagctggatggggattagcggttacaatgggtgtgtttgctgtcggtcaattctcaggtgcacatttaaacccagcggtgtctttagctcttgcattagacggaagttttgattggtcattagttcctggttatattgttgctcaaatgttaggtgcaattgtcggagcaacaattgtatggttaatgtacttgccacattggaaagcgacagaagaagctggcgcgaaattaggtgttttctctacagcaccggctattaagaattactttgccaactttttaagtgagattatcggaacaatggcattaactttaggtattttatttatcggtgtaaacaaaattgccgatggtttaaatcctttaattgtcggagcattaattgttgcaatcggattaagtttaggcggtgctactggttatgcaatcaacccagcacgtcgaatatttgaagatccaagtacatcatataagtattctatttcaatgacaacacgtcaaatgcgtgaaggtgaagttgatggcgtagattacttttttaaaactagggatgcgtttgaagctttaatcaaagatgaccaatttatagaatatgctgaatatgtaggcaactattatggtacaccagttcaatatgttaaagatacaatggacgaaggtcatgatgtatttttagaaattgaagtagaaggtgcaaagcaagttagaaagaaatttccagatgcgctatttattttcttagcacctccaagtttagaacacttgagagagcgattagtaggtagaggaacagaatctgatgagaaaatacaaagtcgtattaacgaagcgcgtaaagaagttgaaatgatgaatttatacgattacgttgcaacacaattacaagcaacagattatgttacaccaatcgtgttaggtgatgagactaaggttcaatctttagcgcaaaaacttgatcttgatatttctaatattgaattaattaatcctgcgacaagtgaattgaaagctgaattagttcaatcatttgttgaacgacgtaaaggtaaagcgactgaagaacaagcacaagaattattaaacaatgtgaactacttcggtacaatgcttgtttatgctggtaaagcagatggtttagttagtggtgcagcacattcaacaggcgacactgtgcgtccagctttacaaatcatcaaaacgaaaccaggtgtatcaagaacatcaggtatcttctttatgattaaaggtgatgaacaatacatctttggtgattgtgcaatcaatccagaacttgattcacaaggacttgcagaaattgcagtagaaagtgcaaaatcagcattacacgaaacagatgaagaaattaacaaaaaagcgcacgctattttcaaacatggaatgactccaattatatgtgttggtgaaacagacgaagagcgtgaaagtggtaaagctaacgatgttgtaggtgagcaagttaagaaagctgttgcaggtttatctgaagatcaacttaaatcagttgtaattgcttatgaaccaatctgggcaatcggaactggtaaatcatcaacatctgaagatgcaaatgaaatgtgtgcatttgtacgtcaaactattgctgacttatcaagcaaagaagtatcaaaagcaactcgtattcaatatggtggtagtgttaaacctaacaacattaaagaatacatggcacaaactgatattgatggggcattagtaggtggcgcagcgtttaaagacgtgccagcctatgatttaggtgcgactttaatagaacatattattaaagagacgggtttgaatccaagtgagattgatgaagttatcatcggtaacgtactacaagcaggacaaggacaaaatccagcacgaattgctgctatgaaaggtggcttgccagaaacagtacctgcatttacggtgaataaagtatgtggttctgggttaaagtcgattcaattagcatatcaatctattgtgactggtgaaaatgacatcgtgctagctggcggtatggagaatatgtctcaatcaccaatgcttgtcaacaacagtcgctttggttttaaaatgggacatcaatcaatggttgatagcatggtatatgatggtttaacagatgtatttaatcaatatcatatgggtattactgctgaaaatttagtagagcaatatggtatttcaagagaagaacaagatacatttgctgtaaactcacaacaaaaagcagtacgtgcacagcaa
ttattaatccaacaagctaaatcgaacagtgacacaacgccggcaatgccattggatacttgtggtgcaatgtcacagggtatgataggctattggttggaaactgaaatcaatcgcattttaactgaaatgaatagtgatagaactgtaggcacaatcgttacacgtgtggaagtagataaagatgatccacgatttgataacctaactaaaccaattggtcctttttatacgaaagaagaagttgaagaattacaaaaagaacagccagactcagtctttaaagaagatgcaggacgtggttatagaaaagtagttgcgtcaccactacctcaatctatactagaacaccagttaattcgaactttagcagacggtaaaaatattgtcattgcatgcggtggtggcggtattccagttataaaaaaagaaaatacctatgaaggtgttgaagcgaattttaattctttaggattagatgatacttatgaagctttaaatattccaattgaagattttcatttaattaaagaaattatttcgaaaaaagaattagatggctttaatatcacaattcctcataaagaacgtatcataccgtatttagatcatgttgatgaacaagcgattaatgcaggtgcagttaacactgttttgataaaagatgacaagtggatagggtataatacagatggtattggttatgttaaaggattgcacagcgtttatccagatttagaaaatgcatacattttaattttgggcgcaggtggtgcaagtaaaggtattgcttatgaattagcaaaatttgtaaagcccaaattaactgttgcgaatagaacgatggctcgttttgaatcttggaatttaaatataaaccaaatttcattagcagatgctgaaaagtatttaggtgctgattggattgtcatcacagctggatggggattagcggttacaatgggtgtgtttgctgtcggtcaattctcaggtgcacatttaaacccagcggtgtctttagctcttgcattagacggaagttttgattggtcattagttcctggttatattgttgctcaaatgttaggtgcaattgtcggagcaacaattgtatggttaatgtacttgccacattggaaagccacagaagaagctggcgcgaaattaggtgttttctctacagcaccggctattaagaattactttgccaactttttaagtgagattatcggaacaatggcattaactttaggtattttatttatcggtgtaaacaaaattgccgatggtttaaatcctttaattgtcggagcattaattgttgcaatcggattaagtttaggcggtgctactggttatgcaatcaacccagcacgtcgaatatttgaagatccaagtacatcatataagtattctatttcaatgacaacacgtcaaatgcgtgaaggtgaagttgatggcgtagatttcttttttaaaactagggatgcgtttgaagctttaattaaagatgaccaatttatagaatatgctgaatatgtaggcaactattatggtacaccagttcaatatgttaaagatacaatggacgaaggtcatgatgtatttttagaaattgaagtagaaggtgcaaagcaagttagaaagaaatttccagatgcgttatttattttcttagcacctccaagtttagatcacttgagagagcgattagtaggtagaggaacagaatccgatgagaaaatacaaagtcgtattaacgaagcgcgtaaagaagttgaaatgatgaatttatacgattacgttgcaacacaattacaagcaacagattatgttacaccaatcgtgttaggtgatgagactaaggttcaatctttagcgcaaaaacttgatcttgatatttctaatattgaattaattaatcctgcgacaagtgaattgaaagctgaattagttcaatcatttgttgaacgacgtaaaggtaaagcgactgaagaacaagcacaagaattattaaacaatgtgaactacttcggtacaatgcttgtttatgctggtaaagcagatggtttagttagtggtgcagcacattcaacaggagacactgtgcgtccagctttacaaatcatcaaaacgaaaccaggtgtatcaagaacatcaggtatcttctttatgattaaaggtgatgaacaatacatctttggtgattgtgcaatcaatccagaacttgattcacaaggacttgcagaaattgcagtagaaagtgcaaaatcagcattacacgaaacagatgaagaaattaacaaaaaagcgcacgctattttcaaacatggaatgactccaattatatgtgttggtgaaacagacgaagagcgtgaaagtggtaaagttaacgatgttgtaggtgagcaagttaagaaagctgttgcaggtttatctgaagatcaacttaaatcagttgtaattgcttatgaaccaatctgggcaatcggaactggtaaatcatcaacatctgaagatgcaaatgaaatgtgtgcatttgtacgtcaaactattgctgacttatcaagcaaagaagtatcagaagcaactcgtattcaatatggtggtagtgttaaacctaacaacattaaagaatacatggcacaaactgatattgatggggcattagtaggtggcgcagcgtttaaagacgtgccagcctatgatttaggtgcgactttaatagaacatattattaaagagacgggtttgaatccaagtgagattgatgaagttatcatcggtaacgtactacaagcaggacaaggacaaaatccagcacgaattgctgctatgaaaggtggcttgccagaaacagtacttgcatttacagtgaataaagtatgtggttctgggttaaagtcgattcaattagcatatcaatctattgtgactggtgaaaatgacatcgtgctagctggcggtatggagaatatgtctcagtcaccaatgcttgtcaacaacagtcgcttcggttttaaaatgggacatcaatcaatggttgatagcatggtatatgatggtttaacagatgtatttaatcaatatcatatgggtattactgctgaaaatttagtggagcaatatggtatttcaagagaagaacaagatacatttgctgtaaactcacaacaaaaagcagtacgtgcacagcaa
ttattaatccaacaagctaaatcgaacagtgacacaacgccggcaatgccattggatacttgtggtgcaatgtcacagggtatgataggctattggttggaaactgaaatcaatcgcattttaactgaaatgaatagtgatagaactgtaggcacaatcgttacacgtgtggaagtagataaagatgatccacgatttgataacctaactaaaccaattggtcctttttatacgaaagaagaagttgaagaattacaaaaagaacagccagactcagtctttaaagaagatgcaggacgtggttatagaaaagtagttgcgtcaccactacctcaatctatactagaacaccagttaattcgaactttagcagacggtaaaaatattgtcattgcatgcggtggtggcggtattccagttataaaaaaagaaaatacctatgaaggtgttgaagcgaattttaattctttaggattagatgatacttatgaagctttaaatattccaattgaagattttcatttaattaaagaaattatttcgaaaaaagaattagaaggctttaatatcacaattcctcataaagaacgtatcataccgtatttagattatgttgatgaacaagcgattaatgcaggtgcagttaacactgttttgataaaagatggcaagtggatagggtataatacagatggtattggttatgttaaaggattgcacagcgtttatccagatttagaaaatgcatacattttaattttgggcgcaggtggtgcaagtaaaggtattgcttatgaattagcaaaatttgtaaagcccaaattaactgttgcgaatagaacgatggctcgttttgaatcttggaatttaaatataaaccaaatttcattagcagatgctgaaaagtatttaggtgctgattggattgtcatcacagctggatggggattagcggttacaatgggtgtgtttgctgtcggtcaattctcaggtgcacatttaaacccagcggtgtctttagctcttgcattagacggaagttttgattggtcattagttcctggttatattgttgctcaaatgttaggtgcaattgtcggagcaacaattgtatggttaatgtacttgccacattggaaagccacagaagaagctggcgcgaaattaggtgttttctctacagcaccggctattaagaattactttgccaactttttaagtgagattatcggaacaatggcattaactttaggtattttatttatcggtgtaaacaaaattgccgatggtttaaatcctttaattgtcggagcattaattgttgcaatcggattaagtttaggcggtgctactggttatgcaatcaacccagcacgtcgaatatttgaagatccaagtacatcatataagtattctatttcaatgacaacacgtcaaatgcgtgaaggtgaagttgatggcgtagattacttttttaaaactagggatgcgtttgaagctttaattaaagatgaccaatttatagaatatgctgaatatgtaggcaactattatggtacaccagttcaatatgttaaagatacaatggacgaaggtcatgatgtatttttagaaattgaagtagaaggtgcaaagcaagttagaaagaaatttccagatgcgttatttattttcttagcacctccaagtttagatcacttgagagagcgattagtaggtagaggaacagaatccgatgagaaaatacaaagtcgtattaacgaagcgcgtaaagaagttgaaatgatgaatttatacgattacgttgcaacacaattacaagcaacagattatgttacaccaatcgtgttaggtgatgagactaaggttcaatctttagcgcaaaaacttgatcttgatatttctaatattgaattaattaatcctgcgacaagtgaattgaaagctgaattagttcaatcatttgttgaacgacgtaaaggtaaagcgactgaagaacaagcacaagaattattaaacaatgtgaactacttcggtacaatgcttgtttatgctggtaaagcagatggtttagttagtggtgcagcacattcaacaggagacactgtgcgtccagctttacaaatcatcaaaacgaaaccaggtgtatcaagaacatcaggtatcttctttatgattaaaggtgatgaacaatacatctttggtgattgtgcaatcaatccagaacttgattcacaaggacttgcagaaattgcagtagaaagtgcaaaatcagcattacacgaaacagatgaagaaattaacaaaaaagcgcacgctattttcaaacatggaatgactccaattatatgtgttggtgaaacagacgaagagcgtgaaagtggtaaagttaacgatgttgtaggtgagcaagttaagaaagctgttgcaggtttatctgaagatcaacttaaatcagttgtaattgcttatgaaccaatctgggcaatcggaactggtaaatcatcaacatctgaagatgcaaatgaaatgtgtgcatttgtacgtcaaactattgctgacttatcaagcaaagaagtatcagaagcaactcgtattcaatatggtggtagtgttaaacctaacaacattaaagaatacatggcacaaactgatattgatggggcattagtaggtggcgcagcgtttaaagacgtgccagcctatgatttaggtgcgactttaatagaacatattattaaagagacgggtttgaatccaagtgagattgatgaagttatcatcggtaacgtactacaagcaggacaaggacaaaatccagcacgaattgctgctatgaaaggtggcttgccagaaacagtacttgcatttacagtgaataaagtatgtggttctgggttaaagtcgattcaattagcatatcaatctattgtgactggtgaaaatgacatcgtgctagctggcggtatggagaatatgtctcagtcaccaatgcttgtcaacaacagtcgcttcggttttaaaatgggacatcaatcaatggttgatagcatggtatatgatggtttaacagatgtatttaatcaatatcatatgggtattactgctgaaaatttagtggagcaatatggtatttcaagagaagaacaagatacatttgctgtaaactcacaacaaaaagcagtacgtgcacagcaa
ttattaatccaacaagctaaatcgaacagtgacacaacgccggcaatgccattggatacttgtggtgcaatgtcacagggtatgataggctattggttggaaactgaaatcaatcgcattttaactgaaatgaatagtgatagaactgtaggcacaatcgttacacgtgtggaagtagataaagatgatccacgatttgataacctaactaaaccaattggtcctttttatacgaaagaagaagttgaagaattacaaaaagaacagccagactcagtctttaaagaagatgcaggacgtggttatagaaaagtagttgcgtcaccactacctcaatctatactagaacaccagttaattcgaactttagcagacggtaaaaatattgtcattgcatgcggtggtggcggtattccagttataaaaaaagaaaatacctatgaaggtgttgaagcgaattttaattctttaggattagatgatacttatgaagctttaaatattccaattgaagattttcatttaattaaagaaattatttcgaaaaaagaattagatggctttaatatcacaattcctcataaagaacgtatcataccgtatttagatcatgttgatgaacaagcgattaatgcaggtgcagttaacactgttttgataaaagatgacaagtggatagggtataatacagatggtattggttatgttaaaggattgcacagcgtttatccagatttagaaaatgcatacattttaattttgggcgcaggtggtgcaagtaaaggtattgcttatgaattagcaaaatttgtaaagcccaaattaactgttgcgaatagaacgatggctcgttttgaatcttggaatttaaatataaaccaaatttcattagcagatgctgaaaagtatttaggtgctgattggattgtcatcacagctggatggggattagcggttacaatgggtgtgtttgctgtcggtcaattctcaggtgcacatttaaacccagcggtgtctttagctcttgcattagacggaagttttgattggtcattagttcctggttatattgttgctcaaatgttaggtgcaattgtcggagcaacaattgtatggttaatgtacttgccacattggaaagccacagaagaagctggcgcgaaattaggtgttttctctacagcaccggctattaagaattactttgccaactttttaagtgagattatcggaacaatggcattaactttaggtattttatttatcggtgtaaacaaaattgccgatggtttaaatcctttaattgtcggagcattaattgttgcaatcggattaagtttaggcggtgctactggttatgcaatcaacccagcacgtcgaatatttgaagatccaagtacatcatataagtattctatttcaatgacaacacgtcaaatgcgtgaaggtgaagttgatggcgtagattacttttttaaaactagggatgcgtttgaagctttaattaaagatgaccaatttatagaatatgctgaatatgtaggcaactattatggtacaccagttcaatatgttaaagatacaatggacgaaggtcatgatgtatttttagaaattgaagtagaaggtgcaaagcaagttagaaagaaatttccagatgcgttatttattttcttagcacctccaagtttagatcacttgagagagcgattagtaggtagaggaacagaatctgatgagaaaatacaaagtcgtattaacgaagcgcgtaaagaagttgaaatgatgaatttatacgattacgttgcaacacaattacaagcaacagattatgttacaccaatcgtgttaggtgatgagactaaggttcaatctttagcgcaaaaacttgatcttgatatttctaatattgaattaattaatcctgcgacaagtgaattgaaagctgaattagttcaatcatttgttgaacgacgtaaaggtaaagcgactgaagaacaagcacaagaattattaaacaatgtgaactacttcggtacaatgcttgtttatgctggtaaagcagatggtttagttagtggtgcagcacattcaacaggagacactgtgcgtccagctttacaaatcatcaaaacgaaaccaggtgtatcaagaacatcaggtatcttctttatgattaaaggtgatgaacaatacatctttggtgattgtgcaatcaatccagaacttgattcacaaggacttgcagaaattgcagtagaaagtgcaaaatcagcattacacgaaacagatgaagaaattaacaaaaaagcgcacgctattttcaaacatggaatgactccaattatatgtgttggtgaaacagacgaagagcgtgaaagtggtaaagttaacgatgttgtaggtgagcaagttaagaaagctgttgcaggtttatctgaagatcaacttaaatcagttgtaattgcttatgaaccaatctgggcaatcggaactggtaaatcatcaacatctgaagatgcaaatgaaatgtgtgcatttgtacgtcaaactattgctgacttatcaagcaaagaagtatcagaagcaactcgtattcaatatggtggtagtgttaaacctaacaacattaaagaatacatggcacaaactgatattgatggggcattagtaggtggcgcagcgtttaaagacgtgccagcctatgatttaggtgcgactttaatagaacatattattaaagagacgggtttgaatccaagtgagattgatgaagttatcatcggtaacgtactacaagcaggacaaggacaaaatccagcacgaattgctgctatgaaaggtggcttgccagaaacagtacttgcatttacagtgaataaagtatgtggttctgggttaaagtcgattcaattagcatatcaatctattgtgactggtgaaaatgacatcgtgctagctggcggtatggagaatatgtctcagtcaccaatgcttgtcaacaacagtcgcttcggttttaaaatgggacatcaatcaatggttgatagcatggtatatgatggtttaacagatgtatttaatcaatatcatatgggtattactgctgaaaatttagtggagcaatatggtatttcaagagaagaacaagatacatttgctgtaaactcacaacaaaaagcagtacgtgcacagcaa
ttattaatccaacaagctaaatcgaacagtgacacaacgccggcaatgccattggatacttgtggtgcaatgtcacagggtatgataggctattggttggaaactgaaatcaatcgcattttaactgaaatgaatagtgatagaactgtaggcacaatcgttacacgtgtggaagtagataaagatgatccacgatttgataacctaactaaaccaattggtcctttttatacgaaagaagaagttgaagaattacaaaaagaacagccagactcagtctttaaagaagatgcaggacgtggttatagaaaagtagttgcgtcaccactacctcaatctatactagaacaccagttaattcgaactttagcagacggtaaaaatattgtcattgcatgcggtggtggcggtattccagttataaaaaaagaaaatacctatgaaggtgttgaagcgaattttaattctttaggattagatgatacttatgaagctttaaatattccaattgaagattttcatttaattaaagaaattatttcgaaaaaagaattagatggctttaatatcacaattcctcataaagaacgtatcataccgtatttagatcatgttgatgaacaagcgattaatgcaggtgcagttaacactgttttgataaaagatgacaagtggatagggtataatacagatggtattggttatgttaaaggattgcacagcgtttatccagatttagaaaatgcatacattttaattttgggcgcaggtggtgcaagtaaaggtattgcttatgaattagcaaaatttgtaaagcccaaattaactgttgcgaatagaacgatggctcgttttgaatcttggaatttaaatataaaccaaatttcattagcagatgctgaaaagtatttaggtgctgattggattgtcatcacagctggatggggattagcggttacaatgggtgtgtttgctgtcggtcaattctcaggtgcacatttaaacccagcggtgtctttagctcttgcattagacggaagttttgattggtcattagttcctggttatattgttgctcaaatgttaggtgcaattgtcggagcaacaattgtatggttaatgtacttgccacattggaaagccacagaagaagctggcgcgaaattaggtgttttctctacagcaccggctattaagaattactttgccaactttttaagtgagattatcggaacaatggcattaactttaggtattttatttatcggtgtaaacaaaattgccgatggtttaaatcctttaattgtcggagcattaattgttgcaatcggattaagtttaggcggtgctactggttatgcaatcaacccagcacgtcgaatatttgaagatccaagtacatcatataagtattctatttcaatgacaacacgtcaaatgcgtgaaggtgaagttgatggcgtagattacttttttaaaactagggatgcgtttgaagctttaattaaagatgaccaatttatagaatatgctgaatatgtaggcaactattatggtacaccagttcaatatgttaaagatacaatggacgaaggtcatgatgtatttttagaaattgaagtagaaggtgcaaagcaagttagaaagaaatttccagatgcgttatttattttcttagcacctccaagtttagatcacttgagagagcgattagtaggtagaggaacagaatccgatgagaaaatacaaagtcgtattaacgaagcgcgtaaagaagttgaaatgatgaatttatacgattacgttgcaacacaattacaagcaacagattatgttacaccaatcgtgttaggtgatgagactaaggttcaatctttagcgcaaaaacttgatcttgatatttctaatattgaattaattaatcctgcgacaagtgaattgaaagctgaattagttcaatcatttgttgaacgacgtaaaggtaaagcgactgaagaacaagcacaagaattattaaacaatgtgaactacttcggtacaatgcttgtttatgctggtaaagcagatggtttagttagtggtgcagcacattcaacaggagacactgtgcgtccagctttacaaatcatcaaaacgaaaccaggtgtatcaagaacatcaggtatcttctttatgattaaaggtgatgaacaatacatctttggtgattgtgcaatcaatccagaacttgattcacaaggacttgcagaaattgcagtagaaagtgcaaaatcagcattacacgaaacagatgaagaaattaacaaaaaagcgcacgctattttcaaacatggaatgactccaattatatgtgttggtgaaacagacgaagagcgtgaaagtggtaaagttaacgatgttgtaggtgagcaagttaagaaagctgttgcaggtttatctgaagatcaacttaaatcagttgtaattgcttatgaaccaatctgggcaatcggaactggtaaatcatcaacatctgaagatgcaaatgaaatgtgtgcatttgtacgtcaaactattgctgacttatcaagcaaagaagtatcagaagcaactcgtattcaatatggtggtagtgttaaacctaacaacattaaagaatacatggcacaaactgatattgatggggcattagtaggtggcgcagcgtttaaagacgtgccagcctatgatttaggtgcgactttaatagaacatattattaaagagacgggtttgaatccaagtgagattgatgaagttatcatcggtaacgtactacaagcaggacaaggacaaaatccagcacgaattgctgctatgaaaggtggcttgccagaaacagtacttgcatttacagtgaataaagtatgtggttctgggttaaagtcgattcaattagcatatcaatctattgtgactggtgaaaatgacatcgtgctagctggcggtatggagaatatgtctcagtcaccaatgcttgtcaacaacagtcgcttcggttttaaaatgggacatcaatcaatggttgatagcatggtatatgatggtttaacagatgtatttaatcaatatcatatgggtattactgctgaaaatttagtggagcaatatggtatttcaagagaagaacaagatacatttgctgtaaactcacaacaaaaagcagtacgtgcacagcaa
ttattaatccaacaagctaaatcgaacagtgacacaacgccggcaatgccattggatacttgtggtgcaatgtcacagggtatgataggctattggttggaaactgaaatcaatcgcattttaactgaaatgaatagtgatagaactgtaggcacaatcgttacacgtgtggaagtagataaagatgatccacgatttgataacctaactaaaccaattggtcctttttatacgaaagaagaagttgaagaattacaaaaagaacagccagactcagtctttaaagaagatgcaggacgtggttatagaaaagtagttgcgtcaccactacctcaatctatactagaacaccagttaattcgaactttagcagacggtaaaaatattgtcattgcatgcggtggtggcggtattccagttataaaaaaagaaaatacctatgaaggtgttgaagcgaattttaattctttaggattagatgatacttatgaagctttaaatattccaattgaagattttcatttaattaaagaaattatttcgaaaaaagaattagatggctttaatatcacaattcctcataaagaacgtatcataccgtatttagatcatgttgatgaacaagcgattaatgcaggtgcagttaacactgttttgataaaagatgacaagtggatagggtataatacagatggtattggttatgttaaaggattgcacagcgtttatccagatttagaaaatgcatacattttaattttgggcgcaggtggtgcaagtaaaggtattgcttatgaattagcaaaatttgtaaagcccaaattaactgttgcgaatagaacgatggctcgttttgaatcttggaatttaaatataaaccaaatttcattagcagatgctgaaaagtatttaggtgctgattggattgtcatcacagctggatggggattagcggttacaatgggtgtgtttgctgtcggtcaattctcaggtgcacatttaaacccagcggtgtctttagctcttgcattagacggaagttttgattggtcattagttcctggttatattgttgctcaaatgttaggtgcaattgtcggagcaacaattgtatggttaatgtacttgccacattggaaagccacagaagaagctggcgcgaaattaggtgttttctctacagcaccggctattaagaattactttgccaactttttaagtgagattatcggaacaatggcattaactttaggtattttatttatcggtgtaaacaaaattgccgatggtttaaatcctttaattgtcggagcattaattgttgcaatcggattaagtttaggcggtgctactggttatgcaatcaacccagcacgtcgaatatttgaagatccaagtacatcatataagtattctatttcaatgacaacacgtcaaatgcgtgaaggtgaagttgatggcgtagattacttttttaaaactagggatgcgtttgaagctttaattaaagatgaccaatttatagaatatgctgaatatgtaggcaactattatggtacaccagttcaatatgttaaagatacaatggacgaaggtcatgatgtatttttagaaattgaagtagaaggtgcaaagcaagttagaaagaaatttccagatgcgttatttattttcttagcacctccaagtttagatcacttgagagagcgattagtaggtagaggaacagaatccgatgagaaaatacaaagtcgtattaacgaagcgcgtaaagaagttgaaatgatgaatttatacgattacgttgcaacacaattacaagcaacagattatgttacaccaatcgtgttaggtgatgagactaaggttcaatctttagcgcaaaaacttgatcttgatatttctaatattgaattaattaatcctgcgacaagtgaattgaaagctgaattagttcaatcatttgttgaacgacgtaaaggtaaagcgactgaagaacaagcacaagaattattaaacaatgtgaactacttcggtacaatgcttgtttatgctggtaaagcagatggtttagttagtggtgcagcacattcaacaggagacactgtgcgtccagctttacaaatcatcaaaacgaaaccaggtgtatcaagaacatcaggtatcttctttatgattaaaggtgatgaacaatacatctttggtgattgtgcaatcaatccagaacttgattcacaaggacttgcagaaattgcagtagaaagtgcaaaatcagcattacacgaaacagatgaagaaattaacaaaaaagcgcacgctattttcaaacatggaatgactccaattatatgtgttggtgaaacagacgaagagcgtgaaagtggtaaagctaacgatgttgtaggtgagcaagttaagaaagctgttgcaggtttatctgaagatcaacttaaatcagttgtaattgcttatgaaccaatctgggcaatcggaactggtaaatcatcaacatctgaagatgcaaatgaaatgtgtgcatttgtacgtcaaactattgctgacttatcaagcaaagaagtatcagaagcaactcgtattcaatatggtggtagtgttaaacctaacaacattaaagaatacatggcacaaactgatattgatggggcattagtaggtggcgcagcgtttaaagacgtgccagcctatgatttaggtgcgactttaatagaacatattattaaagagacgggtttgaatccaagtgagattgatgaagttatcatcggtaacgtactacaagcaggacaaggacaaaatccagcacgaattgctgctatgaaaggtggcttgccagaaacagtacttgcatttacagtgaataaagtatgtggttctgggttaaagtcgattcaattagcatatcaatctattgtgactggtgaaaatgacatcgtgctagctggcggtatggagaatatgtctcagtcaccaatgcttgtcaacaacagtcgcttcggttttaaaatgggacatcaatcaatggttgatagcatggtatatgatggtttaacagatgtatttaatcaatatcatatgggtattactgctgaaaatttagtggagcaatatggtatttcaagagaagaacaagatacatttgctgtaaactcacaacaaaaagcagtacgtgcacagcaa
ttattaatccaacaagctaaatcgaacagtgacacaacgccggcaatgccattggatacttgtggtgcaatgtcacagggtatgataggctattggttggaaactgaaatcaatcgcattttaactgaaatgaatagtgatagagctgtaggcacaatcgtaacacgtgtggaagtagataaagatgatccacgatttgataacccaactaaaccaattggtcctttttatacaaaagaagaagttgaaaaattacaaaaagaacagccagactcagtatttaaagaagatgcaggacgtggttatagaaaagtagttgcgtcaccactacctctatttatattagaacaccagttaattcgaactttagcagacagtaaagatatcgttattgcatgcggtggtggcggtattccagttataaaaaaagaaaatacctatgaaggtgttgaagcgaattttaattctttaggattagatgatacttatgaagctttaaatattccaattgaagattttcatttaattaaagaaattatttcaaaaaaagaattagatggctttaatatcacaattcctcataaagaacgtatcatgccgtatttagatcatgttgatgaacaagcgattaatgcaggtgcagttaacactgttttgataaaagatggcaagtggatagggtataatacagatggtattggttatgtaaaaggattgcacagcgtttatccagatttagaaaatgcatacattttaattttgggcgcaggtggtgcaagtaaaggtattgcttatgaattagcaaaatttgtaaagcacaaattaactgttgcgaatagaacgatggctcgttttgaatcttggaatttaaatataaaccaaatttcattggcagatgctgaaaagtatttaggtgctgattggattgtcatcacagctggatggggattagcggttacaatgggtgtgtatgctgtcggtcaattctcaggtgcacatttaaacccagcggtgtctttagcacttgctttagacggaagttttgattggtcattagttcctggttatattgttgctcaaatgttaggtgcaattgtcggagcaacaattgtatggttaatgtacttgccacattggaaagcgacagaagaagctggcgcaaaattaggtgttttctctacagcaccggctattaagaattactttgccaactttttaagtgagattatcggaacaatggcattaactttaggtattttatttatcggtgtaaacaaaattgccgatggtttaaatcctttaattgttggggcattaattgttgcaatcggattaagtttaggcggtgctactggttatgcaatcaacccagcacgtcgaatatttgaggatccaagtacatcatataagtattctatttcaatgacaacacgtcaaatgcgtgaaggtgaagttgatggcgtagattacttttttaaaactagggatgcgtttgaagctttaatcaaagatgaccaatttatagaatatgctgaatatgtaggcaactattatggtacaccagttcaatatgttaaagatacaatggacgaaggtcatgatgtatttttagaaattgaagtagaaggtgcaaagcaagttagaaagaaatttccagatgcgttatttattttcttagcacctccaagtttagatcacttgagagagcgattagtaggtagaggaacagaatctgatgagaaaatacaaagtcgtattaacgaagcgcgtaaagaagttgaaatgatgaatttatacgattacgttgcaacacaattacaagcaacagattatgttacaccaatcgtgttaggtgatgagactaaggttcaatctttagcgcaaaaacttaatcttgatatttctaatattgaattaattaatcctgcgacaagtgaattgaaagctgaattagttcaatcatttgttgaacgacgtaaaggtaaagcgactgaagaacaagcacaagaattattaaacaatgtgaactacttcggtacaatgcttgtttatgctggtaaagcagatggtttagttagtggtgcagcacattcaacaggcgacactgtgcgtccagctttacaaatcatcaaaacgaaaccaggtgtatcaagaacatcaggtatcttctttatgattaaaggtgatgaacaatacatctttggtgattgtgcaatcaatccagaacttgattcacaaggacttgcagaaattgcagtagaaagtgcaaaatcagcattacacgaaacagatgaagaaattaacaaaaaagcgcatgctattttcaaacatggtatgacaccaattatttgtgttggtgaaacagatgaagagcgtgaaagtggtaaagctaacgatgttgtaggtgagcaagttaagaaagctgttgcaggtttatctgaagatcaacttaaatcagttgtaattgcttatgaaccaatctgggcaatcggaactggtaaatcatcaacatctgaagatgcgaatgaaatgtgtgcatttgtacgtcaaactattgctggtttatcaagcaaagaagtatcagaagctactcgtattcaatatggtggtagtgttaaacctaacaacattaaagaatacatggcgcaaactgatattgatggggcattagtaggtggcgcagcgtttaaagacgtgccagcctatgatttaggcgcgactttaatagaacatattattaaagagacgggtttgaatccaagtgagattgatgaagttatcatcggtaacgtactacaagcaggacaaggacaaaatccagcacgaattgctgctatgaaaggtggcttgccagaaacagtacctgcatttacagtgaataaagtatgtggttctgggttaaagtcgattcaattagcatatcaatctattgtgactggtgaaaatgacatcgtgctagctggcggtatggagaatatgtctcaatcaccaatgctagtcaacaacagtcgctttggttttaaaatggggcatcaatcaatggttgatagcatggtatatgatggtttaacagatgtatttaatcaatatcatatgggtattactgctgaaaatttagtagagcaatatggtatttcaagagaagaacaagatacatttgctgtaaactcacaacaaaaagcagtacgtgcacagcaa
ttattaatccaacaagctaaatcgaacagtgacacaacgccggcaatgccattggatacttgtggtgcaatgtcacagggtatgataggctattggttggaaactgaaatcaatcgcattttaactgaaatgaatagtgatagagctgtaggcacaatcgtaacacgtgtggaagtagataaagatgatccacgatttgataacccaactaaaccaattggtcctttttatacaaaagaagaagttgaaaaattacaaaaagaacagccagactcagtatttaaagaagatgcaggacgtggttatagaaaagtagttgcgtcaccactacctctatttatattagaacaccagttaattcgaactttagcagacagtaaagatatcgttattgcatgcggtggtggcggtattccagttataaaaaaagaaaatacctatgaaggtgttgaagcgaattttaattctttaggattagatgatacttatgaagctttaaatattccaattgaagattttcatttaattaaagaaattatttcaaaaaaagaattagatggctttaatatcacaattcctcataaagaacgtatcatgccgtatttagatcatgttgatgaacaagcgattaatgcaggtgcagttaacactgttttgataaaagatggcaagtggatagggtataatacagatggtattggttatgtaaaaggattgcacagcgtttatccagatttagaaaatgcatacattttaattttgggcgcaggtggtgcaagtaaaggtattgcttatgaattagcaaaatttgtaaagcacaaattaactgttgcgaatagaacgatggctcgttttgaatcttggaatttaaatataaaccaaatttcattggcagatgctgaaaagtatttaggtgctgattggattgtcatcacagctggatggggattagcggttacaatgggtgtgtatgctgtcggtcaattctcaggtgcacatttaaacccagcggtgtctttagcacttgctttagacggaagttttgattggtcattagttcctggttatattgttgctcaaatgttaggtgcaattgtcggagcaacaattgtatggttaatgtacttgccacattggagagcgacagaagaagctggcgcaaaattaggtgttttctctacagcaccggctattaagaattactttgccaactttttaagtgagattatcggaacaatggcattaactttaggtattttatttatcggtgtaaacaaaattgccgatggtttaaatcctttaattgttggggcattaattgttgcaatcggattaagtttaggcggtgctactggttatgcaatcaacccagcacgtcgaatatttgaggatccaagtacatcatataagtattctatttcaatgacaacacgtcaaatgcgtgaaggtgaagttgatggcgtagattacttttttaaaactagggatgcgtttgaagctttaatcaaagatgaccaatttatagaatatgctgaatatgtaggcaactattatggtacaccagttcaatatgttaaagatacaatggacgaaggtcatgatgtatttttagaaattgaagtagaaggtgcaaagcaagttagaaagaaatttccagatgcgttatttattttcttagcacctccaagtttagatcacttgagagagcgattagtaggtagaggaacagaatctgatgagaaaatacaaagtcgtattaacgaagcgcgtaaagaagttgaaatgatgaatttatacgattacgttgcaacacaattacaagcaacagattatgttacaccaatcgtgttaggtgatgagactaaggttcaatctttagcgcaaaaacttaatcttgatatttctaatattgaattaattaatcctgcgacaagtgaattgaaagctgaattagttcaatcatttgttgaacgacgtaaaggtaaagcgactgaagaacaagcacaagaattattaaacaatgtgaactacttcggtacaatgcttgtttatgctggtaaagcagatggtttagttagtggtgcagcacattcaacaggcgacactgtgcgtccagctttacaaatcatcaaaacgaaaccaggtgtatcaagaacatcaggtatcttctttatgattaaaggtgatgaacaatacatctttggtgattgtgcaatcaatccagaacttgattcacaaggacttgcagaaattgcagtagaaagtgcaaaatcagcattacacgaaacagatgaagaaattaacaaaaaagcgcatgctattttcaaacatggtatgacaccaattatttgtgttggtgaaacagatgaagagcgtgaaagtggtaaagctaacgatgttgtaggtgagcaagttaagaaagctgttgcaggtttatctgaagatcaacttaaatcagttgtaattgcttatgaaccaatctgggcaatcggaactggtaaatcatcaacatctgaagatgcgaatgaaatgtgtgcatttgtacgtcaaactattgctggtttatcaagcaaagaagtatcagaagctactcgtattcaatatggtggtagtgttaaacctaacaacattaaagaatacatggcgcaaactgatattgatggggcattagtaggtggcgcagcgtttaaagacgtgccagcctatgatttaggcgcgactttaatagaacatattattaaagagacgggtttgaatccaagtgagattgatgaagttatcatcggtaacgtactacaagcaggacaaggacaaaatccagcacgaattgctgctatgaaaggtggcttgccagaaacagtacctgcatttacagtgaataaagtatgtggttctgggttaaagtcgattcaattagcatatcaatctattgtgactggtgaaaatgacatcgtgctagctggcggtatggagaatatgtctcaatcaccaatgctagtcaacaacagtcgctttggttttaaaatggggcatcaatcaatggttgatagcatggtatatgatggtttaacagatgtatttaatcaatatcatatgggtattactgctgaaaatttagtagagcaatatggtatttcaagagaagaacaagatacatttgctgtaaactcacaacaaaaagcagtacgtgcacagcaa
ttattaatccaacaagctaaatcgaacagtgacacaacgccggcaatgccattggatacttgtggtgcaatgtcacagggtatgataggctattggttggaaactgaaatcaatcgcattttaactgaaatgaatagtgatagagctgtaggcacaatcgtaacacgtgtggaagtagataaagatgatccacgatttgataacccaactaaaccaattggtcctttttatacaaaagaagaagttgaaaaattacaaaaagaacagccagactcagtatttaaagaagatgcaggacgtggttatagaaaagtagttgcgtcaccactacctctatttatattagaacaccagttaattcgaactttagcagacagtaaagatatcgttattgcatgcggtggtggcggtattccagttataaaaaaagaaaatacctatgaaggtgttgaagcgaattttaattctttaggattagatgatacttatgaagctttaaatattccaattgaagattttcatttaattaaagaaattatttcaaaaaaagaattagatggctttaatatcacaattcctcataaagaacgtatcatgccgtatttagatcatgttgatgaacaagcgattaatgcaggtgcagttaacactgttttgataaaagatggcaagtggatagggtataatacagatggtattggttatgtaaaaggattgcacagcgtttatccagatttagaaaatgcatacattttaattttgggcgcaggtggtgcaagtaaaggtattgcttatgaattagcaaaatttgtaaagcacaaattaactgttgcgaatagaacgatggctcgttttgaatcttggaatttaaatataaaccaaatttcattggcagatgctgaaaagtatttaggtgctgattggattgtcatcacagctggatggggattagcggttacaatgggtgtgtatgctgtcggtcaattctcaggtgcacatttaaacccagcggtgtctttagcacttgctttagacggaagttttgattggtcattagttcctggttatattgttgctcaaatgttaggtgcaattgtcggagcaacaattgtatggttaatgtacttgccacattggaaagcgacagaagaagctggcgcaaaattaggtgttttctctacagcaccggctattaagaattactttgccaactttttaagtgagattatcggaacaatggcattaactttaggtattttatttatcggtgtaaacaaaattgccgatggtttaaatcctttaattgttggggcattaattgttgcaatcggattaagtttaggcggtgctactggttatgcaatcaacccagcacgtcgaatatttgaggatccaagtacatcatataagtattctatttcaatgacaacacgtcaaatgcgtgaaggtgaagttgatggcgtagattacttttttaaaactagggatgcgtttgaagctttaatcaaagatgaccaatttatagaatatgctgaatatgtaggcaactattatggtacaccagttcaatatgttaaagatacaatggacgaaggtcatgatgtatttttagaaattgaagtagaaggtgcaaagcaagttagaaagaaatttccagatgcgttatttattttcttagcacctccaagtttagatcacttgagagagcgattagtaggtagaggaacagaatctgatgagaaaatacaaagtcgtattaacgaagcgcgtaaagaagttgaaatgatgaatttatacgattacgtggcaacacaattacaagcaacagattatgttacaccaatcgtgttaggtgatgagactaaggttcaatctttagcgcaaaaacttaatcttgatatttctaatattgaattaattaatcctgcgacaagtgaattgaaagctgaattagttcaatcatttgttgaacgacgtaaaggtaaagcgactgaagaacaagcacaagaattattaaacaatgtgaactacttcggtacaatgcttgtttatgctggtaaagcagatggtttagttagtggtgcagcacattcaacaggcgacactgtgcgtccagctttacaaatcatcaaaacgaaaccaggtgtatcaagaacatcaggtatcttctttatgattaaaggtgatgaacaatacatctttggtgattgtgcaatcaatccagaacttgattcacaaggacttgcagaaattgcagtagaaagtgcaaaatcagcattacacgaaacagatgaagaaattaacaaaaaagcgcatgctattttcaaacatggtatgacaccaattatttgtgttggtgaaacagatgaagagcgtgaaagtggtaaagctaacgatgttgtaggtgagcaagttaagaaagctgttgcaggtttatctgaagatcaacttaaatcagttgtaattgcttatgaaccaatctgggcaatcggaactggtaaatcatcaacatctgaagatgcgaatgaaatgtgtgcatttgtacgtcaaactattgctggtttatcaagcaaagaagtatcagaagctactcgtattcaatatggtggtagtgttaaacctaacaacattaaagaatacatggcgcaaactgatattgatggggcattagtaggtggcgcagcgtttaaagacgtgccagcctatgatttaggcgcgactttaatagaacatattattaaagagacgggtttgaatccaagtgagattgatgaagttatcatcggtaacgtactacaagcaggacaaggacaaaatccagcacgaattgctgctatgaaaggtggcttgccagaaacagtacctgcatttacagtgaataaagtatgtggttctgggttaaagtcgattcaattagcatatcaatctattgtgactggtgaaaatgacatcgtgctagctggcggtatggagaatatgtctcaatcaccaatgctagtcaacaacagtcgctttggttttaaaatggggcatcaatcaatggttgatagcatggtatatgatggtttaacagatgtatttaatcaatatcatatgggtattactgctgaaaatttagtagagcaatatggtatttcaagagaagaacaagatacatttgctgtaaactcacaacaaaaagcagtacgtgcacagcaa
ttattaatccaacaagctaaatcgaacagtgacacaacgccggtaatgccattggatacttgtggtgcaatgtcacagggtatgataggctattggttggaaactgaaatcaatcgcattttaactgaaatgaatagtgatagaactgtaggcacaatcgttacacgtgtggaagtagataaagatgatccacgattcaataacccaaccaaaccaattggtcctttttatacgaaagaagaagttgaagaattacaaaaagaacagccagactcagtctttaaagaagatgcaggacgtggttatagaaaagtagttgcgtcaccactacctcaatctatactagaacaccagttaattcgaactttagcagacggtaaaaatattgtcattgcatgcggtggtggcggtattccagttataaaaaaagaaaatacctatgaaggtgttgaagcgaattttaattctttaggattagatgatacttatgaagctttaaatattccaattgaagattttcatttaattaaagaaattatttcaaaaaaagaattagatggctttaatatcacaattcctcataaagagcgtatcataccgtatttagatcatgttgatgaacaagcgattaatgcaggtgcagttaacactgttttgataaaagatggcaagtggatagggtataatacagatggtattggttatgtaaaaggattgcacagtgtttatccagatttagaaaatgcatacattttaattttgggcgcaggtggtgcaagtaaaggtattgcttatgaattagcaaaatttgtaaagcccaaattaactgttgcgaatagaacgatggctcgttttgaatcttggaatttaaatataaaccaaatttcattggcagatgctgaaaagtatttaggtgctgattggattgtcatcacagctggatggggattagcggttacaatgggtgtgtttgctgtcggccaattctcaggtgcacatttaaacccagcggtgtctttagctcttgcattagacggaagttttgattggtcattagttcctggttatattgttgctcaaatgttaggtgcaattgtcggagcaacaattgtatggttaatgtacttgccacattggaaagcgacagaagaagctggcgcgaaattaggtgttttctctacagcaccggctattaagaattactttgccaactttttaagtgagattatcggaacaatggcattaactttaggtattttatttatcggtgtaaacaaaattgccgatggtttaaatcctttaattgtcggagcattaattgttgcaattggattaagtttaggcggtgctactggttatgcaatcaacccagcacgtcgaatatttgaagatccaagtacatcatataagtattctatttcaatgacaacacgtcaaatgcgtgaaggtgaagttgatggcgtagattacttttttaaaactagggatgcgtttgaagctttaattaaagatgaccaatttatagaatatgctgaatatgtaggcaactattatggtacaccagttcaatatgttaaagatacaatggatgaaggtcatgatgtatttttagaaattgaagtagaaggtgcaaagcaagttagaaagaaatttccagatgcgttatttattttcttagcacctccaagtttagatcacttgagagagcgattagtaggtagaggaacagaatctgatgagaaaatacaaagtcgtattaacgaagcacgtaaagaagtcgaaatgatgaatttatacgattacgttgcaacacaattacaagcaacagattatgttacaccaatcgtgttaggtgatgagactaaggttcaatctttagcgcaaaaacttaatcttgatatttctaatattgaattaattaatcctgcgacaagtgaattgaaagctgaattagtccaatcatttgttgaacgacgtaaaggtaaagcgactgaagaacaagcgcaagaattattaaacaatgtgaactacttcggtacaatgcttgtttatgctggtaaagcagatggtttagttagtggtgcagcacattcaacaggcgacactgtgcgtccagctttacaaatcatcaaaacgaaaccaggtgtatcaagaacatcaggtattttctttatgattaaaggtgatgaacaatacatctttggtgattgtgcaatcaatccagaacttgattcacaaggacttgcagaaattgcagtagaaagtgcaaaatcagcattacacgaaacagatgaagaaattaacaaaaaagcgcacgctattttcaaacatggaatgactccaattatttgtgttggtgaaacagacgaagagcgtgaaagtggtaaagctaacgatgttgtaggtgggcaagttaagaaagctgttgcaggtttatctgaaaatcaactaaaatcagttgtaattgcttatgaaccaatctgggcaatcggaactggtaaatcatcaacatctgaagatgcgaatgaaatgtgtgcatttgtacgtcaaactattgctgacttatcaagcaaagaagtatcagaagcaactcgtattcaatatggtggtagtgttaaacctaacaacattaaagaatacatggcacaaactgatattgatggggcattagtaggtggcgcagcgtttaaagacgtgccagcctatgatttaggtgcgactttaatagaacatattattaaagagacgggtttgaatccaagtgagattgatgaagtcatcatcggtaacgtactacaagcaggacaaggacaaaatccagcacgaattgctgctatgaaaggtggcttgccagaaacagtacctgcatttacagtgaataaagtatgtggttctgggttaaagtcgattcaattagcatatcaatctattgtgactggtgaaaatgacatcgtgctagctggcggtatggagaatatgtctcaatcgccaatgcttgtcaacaacagtcgctttggttttaaaatgggacatcaatcaatggttgatagcatggtatatgatggtttaacagatgtatttaatcaatatcatatgggtattactgctgaaaatttagtagagcaatatggtatttcaagagaagaacaagatacatttgctgtaaactcacaacaaaaagcagtacgtgcacagcaa
ttattaatccaacaagctaaatcgaacagtgacacaacgccggcaatgccattggatacttgtggtgcaatgtcacaaggtatgataggctattggttggaaactgaaatcaatcgcattttaactgaaatgaatagtgatagaactgtaggcacaatcgtaacacgtgtggaagtagataaagatgatccacgatttgataacccaactaaaccaattggtcctttttatacgaaagaagaagttgaagaattacaaaaagaacagccaggctcagtctttaaagaagatgcaggacgtggttatagaaaagtagttgcgtcaccactacctcaatctatactagaacaccagttaattcgaactttagcagacggtaaaaatattgtcattgcatgcggtggtggcggtattccagttataaaaaaagaaaatacctatgaaggtgttgaagcgaattttaattctttaggattagatgatacttatgaagctttaaatattccaattgaagattttcatttaattaaagaaattatttcgaaaaaagaattagaaggctttaatatcacaattcctcataaagaacgtatcataccgtatttagattatgttgatgaacaagcgattaatgcaggtgcagttaacactgttttgataaaagatggcaagtggatagggtataatacagatggtattggttatgttaaaggattgcacagcgtttatccagatttagaaaatgcatacattttaattttgggcgcaggtggtgcaagtaaaggtattgcttatgaattagcaaaatttgtaaagcccaaattaactgttgcgaatagaacgatggctcgttttgaatcttggaatttaaatataaaccaaatttcattagcagatgctgaaaagtatttaggtgctgattggattgtcatcacagctggatggggattagcggttacaatgggtgtgtttgctgtcggtcaattctcaggtgcacatttaaacccagcggtgtctttagctcttgcattagacggaagttttgattggtcattagttcctggttatattgttgctcaaatgttaggtgcaattgtcggagcaacaattgtatggttaatgtacttgccacattggaaagcgacagaagaagctggcgcgaaattaggtgttttctctacagcaccggctattaagaattactttgccaactttttaagtgagattatcggaacaatggcattaactttaggtattttatttatcggtgtaaacaaaattgccgatggtttaaatcctttaattgtcggagcattaattgttgcaatcggattaagtttaggcggtgctactggttatgcaatcaacccagcacgtcgaatatttgaagatccaagtacatcatataagtattctatttcaatgacaacacgtcaaatgcgtgaaggtgaagttgatggcgtagattacttttttaaaactagggatgcgtttgaagctttaatcaaagatgaccaatttatagaatatgctgaatatgtaggcaactattatggtacaccagttcaatatgttaaagatacaatggacgaaggtcatgatgtatttttagaaattgaagtagaaggtgcaaagcaagttagaaagaaatttccagatgcgctatttattttcttagcacctccaagtttagaacacttgagagagcgattagtaggtagaggaacagaatctgatgagaaaatacaaagtcgtattaacgaagcgcgtaaagaagttgaaatgatgaatttatacgattacgttgcaacacaattacaagcaacagattatgttacaccaatcgtgttaggtgatgagactaaggttcaatctttagcgcaaaaatttgatcttgatatttctaatattgaattaattaatcctgcgacaagtgaattgaaagctgaattagttcaatcatttgttgaacgacgtaaaggtaaagcgactgaagaacaagcacaagaattattaaacaatgtgaactacttcggtacaatgcttgtttatgctggtaaagcagatggtttagttagtggtgcagcacattcaacaggcgacactgtgcgtccagctttacaaatcatcaaaacgaaaccaggtgtatcaagaacatcaggtatcttctttatgattaaaggtgatgaacaatacatctttggtgattgtgcaatcaatccagaacttgattcacaaggacttgcagaaattgcagtagaaagtgcaaaatcagcattacacgaaacagatgaagaaattaacaaaaaagcgcacgctattttcaaacatggaatgactccaattatatgtgttggtgaaacagacgaagagcgtgaaagtggtaaagctaacgatgttgtaggtgagcaagttaagaaagctgttgcaggtttatctgaagatcaacttaaatcagttgtaattgcttatgaaccaatctgggcaatcggaactggtaaatcatcaacatctgaagatgcaaatgaaatgtgtgcatttgtacgtcaaactattgctgacttatcaagcaaagaagtatcagaagcaactcgtattcaatatggtggtagtgttaaacctaacaacattaaagaatacatggcacaaactgatattgatggggcattagtaggtggcgcagcgtttaaagacgtgccagcctatgatttaggtgcgactttaatagaacatattattaaagagacgggtttgaatccaagtgagattgatgaagttatcatcggtaacgtactacaagcaggacaaggacaaaatccagcacgaattgctgctatgaaaggtggcttgccagaaacagtacctgcatttacggtgaataaagtatgtggttctgggttaaagtcgattcaattagcatatcaatctattgtgactggtgaaaatgacatcgtgctagctggcggtatggagaatatgtctcaatcaccaatgcttgtcaacaacagtcgctttggttttaaaatgggacatcaatcaatggttgatagcatggtatatgatggtttaacagatgtatttaatcaatatcatatgggtattactgctgaaaatttagtagagcaatatggtatttcaagagaagaacaagatacatttgctgtaaactcacaacaaaaagcagtacgtgcacagcaa
ttattaatccaacaagctaaatcgaacagtgacacaacgccggcaatgccattggatacttgtggtgcaatgtcacaaggtatgataggctattggttggaaactgaaatcaatcgcattttaactgaaatgaatagtgatagaactgtaggcacaatcgtaacacgtgtggaagtagataaagatgatccacgatttgataacccaactaaaccaattggtcctttttatacgaaagaagaagttgaagaattacaaaaagaacagccaggctcagtctttaaagaagatgcaggacgtggttatagaaaagtagttgcgtcaccactacctcaatctatactagaacaccagttaattcgaactttagcagacggtaaaaatattgtcattgcatgcggtggtggcggtattccagttataaaaaaagaaaatacctatgaaggtgttgaagcgaattttaattctttaggattagatgatacttatgaagctttaaatattccaattgaagattttcatttaattaaagaaattatttcgaaaaaagaattagaaggctttaatatcacaattcctcataaagaacgtatcataccgtatttagattatgttgatgaacaagcgattaatgcaggtgcagttaacactgttttgataaaagatggcaagtggatagggtataatacagatggtattggttatgttaaaggattgcacagcgtttatccagatttagaaaatgcatacattttaattttgggcgcaggtggtgcaagtaaaggtattgcttatgaattagcaaaatttgtaaagcccaaattaactgttgcgaatagaacgatggctcgttttgaatcttggaatttaaatataaaccaaatttcattagcagatgctgaaaagtatttaggtgctgattggattgtcatcacagctggatggggattagcggttacaatgggtgtgtttgctgtcggtcaattctcaggtgcacatttaaacccagcggtgtctttagctcttgcattagacggaagttttgattggtcattagttcctggttatattgttgctcaaatgttaggtgcaattgtcggagcaacaattgtatggttaatgtacttgccacattggaaagcgacagaagaagctggcgcgaaattaggtgttttctctacagcaccggctattaagaattactttgccaactttttaagtgagattatcggaacaatggcattaactttaggtattttatttatcggtgtaaacaaaattgccgatggtttaaatcctttaattgtcggagcattaattgttgcaatcggattaagtttaggcggtgctactggttatgcaatcaacccagcacgtcgaatatttgaagatccaagtacatcatataagtattctatttcaatgacaacacgtcaaatgcgtgaaggtgaagttgatggcgtagattacttttttaaaactagggatgcgtttgaagctttaatcaaagatgaccaatttatagaatatgctgaatatgtaggcaactattatggtacaccagttcaatatgttaaagatacaatggacgaaggtcatgatgtatttttagaaattgaagtagaaggtgcaaagcaagttagaaagaaatttccagatgcgctatttattttcttagcacctccaagtttagaacacttgagagagcgattagtaggtagaggaacagaatctgatgagaaaatacaaagtcgtattaacgaagcgcgtaaagaagttgaaatgatgaatttatacgattacgttgcaacacaattacaagcaacagattatgttacaccaatcgtgttaggtgatgagactaaggttcaatctttagcgcaaaaacttgatcttgatatttctaatattgaattaattaatcctgcgacaagtgaattgaaagctgaattagttcaatcatttgttgaacgacgtaaaggtaaagcgactgaagaacaagcacaagaattattaaacaatgtgaactacttcggtacaatgcttgtttatgctggtaaagcagatggtttagttagtggtgcagcacattcaacaggcgacactgtgcgtccagctttacaaatcatcaaaacgaaaccaggtgtatcaagaacatcaggtatcttctttatgattaaaggtgatgaacaatacatctttggtgattgtgcaatcaatccagaacttgattcacaaggacttgcagaaattgcagtagaaagtgcaaaatcagcattacacgaaacagatgaagaaattaacaaaaaagcgcacgctattttcaaacatggaatgactccaattatatgtgttggtgaaacagacgaagagcgtgaaagtggtaaagctaacgatgttgtaggtgagcaagttaagaaagctgttgcaggtttatctgaagatcaacttaaatcagttgtaattgcttatgaaccaatctgggcaatcggaactggtaaatcatcaacatctgaagatgcaaatgaaatgtgtgcatttgtacgtcaaactattgctgacttatcaagcaaagaagtatcagaagcaactcgtattcaatatggtggtagtgttaaacctaacaacattaaagaatacatggcacaaactgatattgatggggcattagtaggtggcgcagcgtttaaagacgtgccagcctatgatttaggtgcgactttaatagaacatattattaaagagacgggtttgaatccaagtgagattgatgaagttatcatcggtaacgtactacaagcaggacaaggacaaaatccagcacgaattgctgctatgaaaggtggcttgccagaaacagtacctgcatttacggtgaataaagtatgtggttctgggttaaagtcgattcaattagcatatcaatctattgtgactggtgaaaatgacgtcgtgctagctggcggtatggagaatatgtctcaatcaccaatgcttgtcaacaacagtcgctttggttttaaaatgggacatcaatcaatggttgatagcatggtatatgatggtttaacagatgtatttaatcaatatcatatgggtattactgctgaaaatttagtagagcaatatggtatttcaagagaagaacaagatacatttgctgtaaactcacaacaaaaagcagtacgtgcacagcaa
ttattaatccaacaagctaaatcgaacagtgacacaacgccggcaatgccattggatacttgtggtgcaatgtcacagggtatgataggctattggttggaaactgaaatcaatcgcattttaactgaaatgaatagtgatagaactgtaggcacaatcgttacacgtgtggaagtagataaagatgatccacgattcaataccccaaccaaaccaattggtcctttttatacgaaagaagaagttgaagaattacaaaaagaacagccagactcagtctttaaagaagatgcaggacgtggttatagaaaagtagttgcgtcaccactacctcaatctatactagaacaccagttaattcgaactttagcagacggtaaaaatattgtcattgcatgcggtggtggcggtattccagttataaaaaaagaaaatacctatgaaggtgttgaagcgaattttaattctttaggattagatgatacttatgaagctttaaatattccaattgaagattttcatttaattaaagaaattatttcgaaaaaagaattagatggctttaatatcacaattcctcataaagaacgtatcataccatatttagatcatgttgatgaacaagcgattaatgcaggtgcagttaacactgttttgataaaagatgacaagtggatagggtataatacagatggtattggttatgttaaaggattgcacagcgtttatccagatttagaaaatgcatacattttaattttgggcgcaggtggtgcaagtaaaggtattgcttatgaattagcaaaatttgtaaagcccaaattaactgttgcgaatagaacgatggctcgttttgaatcttggaatttaaatataaaccaaatttcaatagcagatgctgaaaagtatttaggtgctgattggattgtcatcacagctggatggggattagcggttacaatgggtgtgtttgctgtcggtcaattctcaggtgcacatttaaacccagcggtgtctttagctcttgcattagacggaagttttgattggtcattagttcctggttatattgttgctcaaatgttaggtgcaattgtcggagcaacaattgtatggttaatgtacttgccacattggaaagcgacagaagaagctggcgcgaaattaggtgttttctctacagcaccggctattaagaattactttgccaactttttaagtgagattatcggaacaatggcattaactttaggtattttatttatcggtgtaaacaaaattgccgatggtttaaatcctttaattgtcggagcattaattgttgcaatcggattaagtttaggcggtgctactggttatgcaatcaacccagcacgtcgaatatttgaagatccaagtacatcatataagtattctatttcaatgacaacacgtcaaatgcgtgaaggtgaagttgatggcgtagattacttttttaaaactagggatgcgtttgaagctttaatcaaagatgaccaatttatagaatatgctgaatatgtaggcaactattatggtacaccagttcaatatgttaaagatacaatggacgaaggtcatgatgtatttttagaaattgaagtagaaggtgcaaagcaagttagaaagaaatttccagatgcgctatttattttcttagcacctccaagtttagaacacttgagagagcgattagtaggtagaggaacagaatctgatgagaaaatacaaagtcgtattaacgaagcgcgtaaagaagttgaaatgatgaatttatacgattacgttgcaacacaattacaagcaacagattatgttacaccaatcgtgttaggtgatgagactaaggttcaatctttagcgcaaaaacttgatcttgatatttctaatattgaattaattaatcctgcgacaagtgaattgaaagctgaattagttcaatcatttgttgaacgacgtaaaggtaaagcgactgaagaacaagcacaagaattattaagcaatgtgaactacttcggtacaatgcttgtttatgctggtaaagcagatggtttagttagtggtgcagcacattcaacaggagacactgtgcgtccagctttacaaatcatcaaaacgaaaccaggtgtatcaagaacatcaggtatcttctttatgattaaaggtgatgtacaatacatctttggtgattgtgcaatcaatccagaacttgattcacaaggacttgcagaaattgcagtagaaagtgcaaaatcagcattacacgaaacagatgaagaaattaacaaaaaagcgcacgctattttcaaacatggaatgactccaattatttgtgttggtgaaacagacgaagagcgtgaaagtggtaaagctaacgatgttgtaggtgagcaagttaagaaagctgttgcaggtttatctgaagatcaacttaaatcagttgtaattgcttatgagccaatctgggcaatcggaactggtaaatcatcaacatctgaagatgcaaatgaaatgtgtgcatttgtacgtcaaactattgctgacttatcaagcaaagaagtatcagaagcaactcgtattcaatatggtggtagtgttaaacctaacaacattaaagaatacatggcacaaactgatattgatggggcattagtaggtggcgcagcgtttaaagacgtgccagcctatgatttaggtgcgactttaatagaacatattattaaagagacgggtttgaatccaagtgagattgatgaagttatcatcggtaacgtactacaagcaggacaaggacaaaatccagcacgaattgctgctatgaaaggtggcttgccagaaacagtacctgcatttacagtgaataaagtatgtggttctgggttaaagtcgattcaattagcatatcaatctattgtgactggtgaaaatgacatcgtgctagctggcggtatggagaatatgtctcagtcaccaatgcttgtcaacaacagtcgcttcggttttaaaatgggacatcaatcaatggttgatagcatggtatatgatggtttaacagatgtatttaatcaatatcatatgggtattactgctgaaaatttagtagagcaatatggtatttcaagagaagaacaagatacatttgctgtaaactcacaacaaaaagcagtacgtgcacagcaa
ttattaatccaacaagctaaatcgaacagtgacacaacgccggcaatgccattggatacttgtggtgcaatgtcacagggtatgataggctattggttggaaactgaaatcaatcgcattttaactgaaatgaatagtgatagaactgtaggcacaatcgttacacgtgtggaagtagataaagatgatccacgattcaataccccaaccaaaccaattggtcctttttatacgaaagaagaagttgaagaattacaaaaagaacagccagactcagtctttaaagaagatgcaggacgtggttatagaaaagtagttgcgtcaccactacctcaatctatactagaacaccagttaattcgaactttagcagacggtaaaaatattgtcattgcatgcggtggtggcggtattccagttataaaaaaagaaaatacctatgaaggtgttgaagcgaattttaattctttaggattagatgatacttatgaagctttaaatattccaattgaagattttcatttaattaaagaaattatttcgaaaaaagaattagatggctttaatatcacaattcctcataaagaacgtatcataccgtatttagatcatgttgatgaacaagcgattaatgcaggtgcagttaacactgttttgataaaagatgacaagtggatagggtataatacagatggtattggttatgttaaaggattgcacagcgtttatccagatttagaaaatgcatacattttaattttgggcgcaggtggtgcaagtaaaggtattgcttatgaattagcaaaatttgtaaagcccaaattaactgttgcgaatagaacgatggctcgttttgaatcttggaatttaaatataaaccaaatttcattagcagatgctgaaaagtatttaggtgctgattggattgtcatcacagctggatggggattagcggttacaatgggtgtgtttgctgtcggtcaattctcaggtgcacatttaaacccagcggtgtctttagctcttgcattagacggaagttttgattggtcattagttcctggttatattgttgctcaaatgttaggtgcaattgtcggagcaacaattgtatggttaatgtacttgccacattggaaagcgacagaagaagctggcgcgaaattaggtgttttctctacagcaccggctattaagaattactttgccaactttttaagtgagattatcggaacaatggcattaactttaggtattttatttatcggtgtaaacaaaattgccgatggtttaaatcctttaattgtcggagcattaattgttgcaatcggattaagtttaggcggtgctactggttatgcaatcaacccagcacgtcgaatatttgaagatccaagtacatcatataagtattctatttcaatgacaacacgtcaaatgcgtgaaggtgaagttgatggcgtagattacttttttaaaactagggatgcgtttgaagctttaatcaaagatgaccaatttatagaatatgctgaatatgtaggcaactattatggtacaccagttcaatatgttaaagatacaatggacgaaggtcatgatgtatttttagaaattgaagtagaaggtgcaaagcaagttagaaagaaatttccagatgcgctatttattttcttagcacctccaagtttagaacacttgagagagcgattagtaggtagaggaacagaatctgatgagaaaatacaaagtcgtattaacgaagcgcgtaaagaagttgaaatgatgaatttatacgattacgttgcaacacaattacaagcaacagattatgttacaccaatcgtgttaggtgatgagactaaggttcaatctttagcgcaaaaacttgatcttgatatttctaatattgaattaattaatcctgcgacaagtgaattgaaagctgaattagttcaatcatttgttgaacgacgtaaaggtaaagcgactgaagaacaagcacaagaattattaagcaatgtgaactacttcggtacaatgcttgtttatgctggtaaagcagatggtttagttagtggtgcagcacattcaacaggagacactgtgcgtccagctttacaaatcatcaaaacgaaaccaggtgtatcaagaacatcaggtatcttctttatgattaaaggtgatgtacaatacatctttggtgattgtgcaatcaatccagaacttgattcacaaggacttgcagaaattgcagtagaaagtgcaaaatcagcattacacgaaacagatgaagaaattaacaaaaaagcgcacgctattttcaaacatggaatgactccaattatttgtgttggtgaaacagacgaagagcgtgaaagtggtaaagctaacgatgttgtaggtgagcaagttaagaaagctgttgcaggtttatctgaagatcaacttaaatcagttgtaattgcttatgagccaatctgggcaatcggaactggtaaatcatcaacatctgaagatgcaaatgaaatgtgtgcatttgtacgtcaaactattgctgacttatcaagcaaagaagtatcagaagcaactcgtattcaatatggtggtagtgttaaacctaacaacattaaagaatacatggcacaaactgatattgatggggcattagtaggtggcgcagcgtttaaagacgtgccagcctatgatttaggtgcgactttaatagaacatattattaaagagacgggtttgaatccaagtgagattgatgaagttatcatcggtaacgtactacaagcaggacaaggacaaaatccagcacgaattgctgctatgaaaggtggcttgccagaaacagtacctgcatttacagtgaataaagtatgtggttctgggttaaagtcgattcaattagcatatcaatctattgtgactggtgaaaatgacatcgtgctagctggcggtatggagaatatgtctcagtcaccaatgcttgtcaacaacagtcgcttcggttttaaaatgggacatcaatcaatggttgatagcatggtatatgatggtttaacagatgtatttaatcaatatcatatgggtattactgctgaaaatttagtagagcaatatggtatttcaagagaagaacaagatacatttgctgtaaactcacaacaaaaagcagtacgtgcacagcaa
ttattaatccaacaagctaaatcgaacagtgacacaacgccggcaatgccattggatacttgtggtgcaatgtcacagggtatgataggctattggttggaaactgaaatcaatcgcattttaactgaaatgaatagtgatagaactgtaggcacaatcgttacacgtgtggaagtagataaagatgatccacgattcaataacccaaccaaaccaattggtcctttttatacgaaagaagaagttgaagaattacaaaaagaacagccagactcagtctttaaagaagatgcaggacgtggttatagaaaagttgttgcgtcaccactacctcaatctatactagaacaccagttaattcgaactttagcagacggtaaaaatattgtcattgcatgcggtggtggcggtattccagttataaaaaaagaaaatacctatgaaggtgttgaagcgaattttaattctttaggattagatgatacttatgaagctttaaatattccaattgaagattttcatttaattaaagaaattatttcgaaaaaagaattagatggctttaatatcacaattcctcataaagagcgtatcataccgtatttagatcatgttgatgaacaagcgattaatgcaggtgcagttaacactgttttgataaaagatggcaagtggatagggtataatacagatggtattggttatgttaaaggattgcacagcgtttatccagatttagaaaatgcatacattttaattttgggcgcaggtggtgcaagtaaaggtattgcttatgaattagcaaaatttgtaaagcccaaattaactgttgcgaatagaacgatggctcgttttgaatcttggaatttaaatataaaccaaatttcaatagcagatgctgaaaagtatttaggtgctgattggattgtcatcacagctggatggggattagcggttacaatgggtgtgtttgctgtcggtcaattctcaggtgcacatttaaacccagcggtgtctttagctcttgcattagacggaagttttgattggtcattagttcctggttatattgttgctcaaatgttaggtgcaattgtcggagcaacaattgtatggttaatgtacttgccacattggaaagcgacagaagaagctggcgcgaaattaggtgttttctctacagcaccggctattaagaattactttgccaactttttaagtgagattatcggaacaatggcattaactttaggtattttatttatcggtgtaaacaaaattgccgatggtttaaatcctttaattgtcggagcattaattgttgcaatcggattaagtttaggcggtgctactggttatgcaatcaacccagcacgtcgaatatttgaagatccaagtacatcatataagtattctatttcaatgacaacacgtcaaatgcgtgaaggtgaagttgatggcgtagattacttttttaaaactagggatgcgtttgaagctttaatcaaagatgaccaatttatagaatatgctgaatatgtaggcaactattatggtacaccagttcaatatgttaaagatacaatggacgaaggtcatgatgtatttttagaaattgaagtagaaggtgcaaagcaagttagaaagaaatttccagatgcattatttattttcttagcacctccaagtttagatcacttgagagagcgattagtaggtagaggaacagaatccgatgagaaaatacaaagtcgtattaacgaagcacgtaaagaagtcgaaatgatgaatttatacgattacgttgcaacacaattacaagcaacagattatgttacaccaatcgtgttaggtgatgagactaaggttcaatctttagcgcaaaaacttaatcttgatatttctaatattgaattaattaatcctgcgacaagtgaatttaaagctgaattagtccaatcatttgttgaacgacgtaaaggtaaagcgactgaagaacaagcgcaagaattattaaacaatgtgaactacttcggtacaatgcttgtttatgctggtaaagcagatggtttagttagtggtgcagcacattcaacaggagacactgtgcgtccagctttacaaatcatcaaaacgaaaccaggtttatcaagaacatcaggtatcttctttatgattaaaggtgatgaacaatacatctttggtgattgtgcaatcaatccagaacttgattcacaaggacttgcagaaattgcagtagaaagtgcaaaatcagcattacacgaaacagataaagaaattaacaaaaaagcgcacgctattttcaaacatggaatgactccaattatatgtgttggtgaaacagacgaagagcgtgaaagtggtaaagctaacgatgttgtaggtgagcaagttaagaaagctgttgcaggtttatctgaaaatcaactaaaatcagttgtaattgcttatgaaccaatctgggcaatcggaactggtaaatcatcaacatctgaagatgcgaatgaaatgtgtgcatttgtacgtcaaactattgctgacttatcaagcaaagaagtatcagaagcaactcgtattcaatatggtggtagtgttaaacctaacaacattaaagaatacatggcacaaactgatattgatggggcattagtaggtggcgcagcgtttaaagacgtgccagcctatgatttaggtgcgactttaatagaacatattattaaagagacgggtttgaatccaagtgagattgatgaagttatcatcggtaacgtactacaagcaggacaaggacaaaatccagcacgaattgctgctatgaaaggtggcttaccagagacagtacctgcatttacagtgaataaagtatgtggttctgggttaaagtcgattcaattagcatatcaatctattgtgactggtgaaaatgacatcgtgctagctggcggtatggagaatatgtctcaatcaccaatgcttgtcaacaacagtcgctttggttttaaaatgggacatcaatcaatggttgatagcatggtatatgatggtttaacagatgtatttaatcaatatcatatgggtattactgctgaaaatttagtagagcaatatggtatttcaagagaagaacaagatacatttgctgtaaactcacaacaaaaagcagtacgtgcacagcaa
;
END; [Characters]

BEGIN Distances;
DIMENSIONS ntax=87;
FORMAT labels=left diagonal triangle=both;
MATRIX
[1] 'ST1303'   0.0 0.008130081 0.007817386 0.005628518 0.0756723 0.076297686 0.07661038 0.07692308 0.07661038 0.076297686 0.07473421 0.07754847 0.076297686 0.07598499 0.076297686 0.07661038 0.07817386 0.076297686 0.07661038 0.07723577 0.07692308 0.07661038 0.07692308 0.07661038 0.07661038 0.076297686 0.07661038 0.07692308 0.0756723 0.07661038 0.07786116 0.07598499 0.07661038 0.076297686 0.07692308 0.076297686 0.07661038 0.076297686 0.07661038 0.07598499 0.07692308 0.07661038 0.07661038 0.07723577 0.076297686 0.07692308 0.07692308 0.07692308 0.07723577 0.07786116 0.07661038 0.0753596 0.075046904 0.075046904 0.07692308 0.07692308 0.07442151 0.076297686 0.07661038 0.075046904 0.075046904 0.0756723 0.076297686 0.07473421 0.076297686 0.07692308 0.0756723 0.075046904 0.07692308 0.07598499 0.0756723 0.07473421 0.075046904 0.07754847 0.07692308 0.07692308 0.07723577 0.07692308 0.07879925 0.07911195 0.07911195 0.07786116 0.07598499 0.0753596 0.07754847 0.07692308 0.07817386
[2] 'ST1304'   0.008130081 0.0 9.380863E-4 0.005003127 0.07786116 0.07661038 0.07692308 0.07723577 0.07692308 0.07723577 0.0756723 0.07911195 0.078486554 0.07817386 0.07723577 0.07754847 0.078486554 0.07661038 0.07692308 0.07754847 0.07786116 0.07817386 0.078486554 0.07754847 0.07817386 0.07786116 0.07754847 0.078486554 0.07786116 0.07754847 0.07879925 0.07754847 0.07754847 0.07723577 0.07786116 0.07723577 0.07754847 0.07786116 0.07754847 0.07692308 0.07911195 0.07754847 0.07817386 0.07942464 0.07723577 0.078486554 0.07786116 0.07786116 0.07879925 0.07942464 0.07754847 0.07754847 0.07723577 0.07723577 0.07723577 0.07723577 0.07661038 0.078486554 0.07692308 0.07723577 0.07723577 0.07661038 0.07723577 0.07692308 0.07786116 0.07723577 0.07786116 0.07723577 0.07723577 0.07754847 0.07723577 0.07692308 0.07723577 0.078486554 0.078486554 0.07786116 0.07817386 0.07786116 0.07911195 0.07942464 0.07942464 0.07817386 0.07817386 0.07754847 0.07911195 0.078486554 0.07911195
[3] 'ST75'     0.007817386 9.380863E-4 0.0 0.0053158225 0.07692308 0.07754847 0.07786116 0.07817386 0.07786116 0.07754847 0.07598499 0.07879925 0.07754847 0.07723577 0.07754847 0.07786116 0.07942464 0.07754847 0.07786116 0.078486554 0.07817386 0.078486554 0.07879925 0.07786116 0.078486554 0.07692308 0.07786116 0.07879925 0.07692308 0.07786116 0.07911195 0.07786116 0.07786116 0.07754847 0.07817386 0.07754847 0.07786116 0.07817386 0.07786116 0.07723577 0.07817386 0.07786116 0.078486554 0.078486554 0.07754847 0.07879925 0.07817386 0.07817386 0.07911195 0.079737335 0.07786116 0.07661038 0.076297686 0.076297686 0.07754847 0.07817386 0.0756723 0.07754847 0.07723577 0.076297686 0.076297686 0.07692308 0.07754847 0.07598499 0.07817386 0.07754847 0.07692308 0.076297686 0.07754847 0.07786116 0.07754847 0.07598499 0.076297686 0.07879925 0.07754847 0.07817386 0.078486554 0.07817386 0.08005003 0.08036273 0.08036273 0.07911195 0.07723577 0.07661038 0.07942464 0.07879925 0.07942464
[4] 'ST883'    0.005628518 0.005003127 0.0053158225 0.0 0.07723577 0.07661038 0.07692308 0.07723577 0.07692308 0.07723577 0.075046904 0.078486554 0.07786116 0.07754847 0.07661038 0.07754847 0.078486554 0.07661038 0.07692308 0.07754847 0.07661038 0.07817386 0.078486554 0.07692308 0.07817386 0.07723577 0.07692308 0.078486554 0.07723577 0.07692308 0.07879925 0.07692308 0.07692308 0.07661038 0.07723577 0.07661038 0.07692308 0.07786116 0.07692308 0.076297686 0.078486554 0.07692308 0.07817386 0.07879925 0.07661038 0.078486554 0.07723577 0.07723577 0.07879925 0.07942464 0.07754847 0.07692308 0.07661038 0.07661038 0.07723577 0.07723577 0.07598499 0.07786116 0.07692308 0.07661038 0.07661038 0.07598499 0.07723577 0.076297686 0.07786116 0.07723577 0.07723577 0.07661038 0.07723577 0.07754847 0.07723577 0.076297686 0.07661038 0.078486554 0.07786116 0.07786116 0.07817386 0.07786116 0.07911195 0.07942464 0.07942464 0.07817386 0.07692308 0.07692308 0.07911195 0.078486554 0.07911195
[5] 'ST239'    0.0756723 0.07786116 0.07692308 0.07723577 0.0 0.0068792994 0.007191995 0.0075046904 0.0046904315 0.006566604 0.0046904315 0.006566604 0.0043777362 0.0040650405 0.0040650405 0.006566604 0.011569731 0.009068168 0.009068168 0.009068168 0.01094434 0.0053158225 0.005628518 0.007191995 0.0043777362 0.005941213 0.006566604 0.005628518 0.002814259 0.006566604 0.009068168 0.0046904315 0.006566604 0.0068792994 0.0068792994 0.006253909 0.006566604 0.005003127 0.006566604 0.0043777362 0.0053158225 0.006566604 0.0053158225 0.005628518 0.0068792994 0.005628518 0.0068792994 0.0068792994 0.005941213 0.006566604 0.006253909 0.0015634772 0.0012507817 0.0012507817 0.010631645 0.011257036 0.0012507817 0.0043777362 0.010318949 0.0012507817 0.0015634772 0.0037523452 0.005628518 9.380863E-4 0.0046904315 0.010631645 0.0034396497 0.0012507817 0.010631645 0.0037523452 0.0034396497 0.0015634772 0.0012507817 0.006253909 0.005003127 0.005628518 0.005941213 0.005628518 0.013758599 0.014071294 0.014071294 0.010631645 3.1269543E-4 3.1269543E-4 0.006253909 0.005628518 0.009380863
[6] 'ST30'     0.076297686 0.07661038 0.07754847 0.07661038 0.0068792994 0.0 3.1269543E-4 6.2539085E-4 0.0021888681 0.009068168 0.007817386 0.01094434 0.010006254 0.009693558 0.007817386 0.007817386 0.007191995 0.0053158225 0.0053158225 0.0053158225 0.008442776 0.009693558 0.010006254 0.009693558 0.0087554725 0.009068168 0.009068168 0.010006254 0.008442776 0.009068168 0.009693558 0.009068168 0.009068168 0.009380863 0.009380863 0.0087554725 0.009068168 0.009380863 0.009068168 0.008130081 0.010318949 0.009068168 0.009693558 0.010631645 0.009380863 0.010006254 0.009380863 0.009380863 0.009693558 0.01094434 0.0087554725 0.008442776 0.008130081 0.008130081 0.008130081 0.0068792994 0.0075046904 0.009380863 0.007817386 0.008130081 0.008442776 0.0075046904 0.0087554725 0.007817386 0.009068168 0.008130081 0.009068168 0.008130081 0.008130081 0.0087554725 0.008442776 0.007817386 0.008130081 0.009380863 0.009380863 0.0087554725 0.009068168 0.0087554725 0.013758599 0.014071294 0.014071294 0.008130081 0.007191995 0.007191995 0.010631645 0.010006254 0.010006254
[7] 'ST36'     0.07661038 0.07692308 0.07786116 0.07692308 0.007191995 3.1269543E-4 0.0 9.380863E-4 0.0025015634 0.009380863 0.008130081 0.011257036 0.010318949 0.010006254 0.008130081 0.008130081 0.0075046904 0.005628518 0.005628518 0.005628518 0.0087554725 0.010006254 0.010318949 0.010006254 0.009068168 0.009380863 0.009380863 0.010318949 0.008130081 0.009380863 0.010006254 0.009380863 0.009380863 0.009693558 0.009693558 0.009068168 0.009380863 0.009693558 0.009380863 0.008442776 0.010631645 0.009380863 0.010006254 0.01094434 0.009693558 0.010318949 0.009693558 0.009693558 0.010006254 0.011257036 0.009068168 0.0087554725 0.008442776 0.008442776 0.008442776 0.007191995 0.007817386 0.009693558 0.008130081 0.008442776 0.0087554725 0.007817386 0.009068168 0.008130081 0.009380863 0.008442776 0.009380863 0.008442776 0.008442776 0.009068168 0.0087554725 0.008130081 0.008442776 0.009693558 0.009693558 0.009068168 0.009380863 0.009068168 0.014071294 0.01438399 0.01438399 0.008442776 0.0075046904 0.0075046904 0.01094434 0.010318949 0.010318949
[8] 'ST39'     0.07692308 0.07723577 0.07817386 0.07723577 0.0075046904 6.2539085E-4 9.380863E-4 0.0 0.002814259 0.009693558 0.008442776 0.011569731 0.010631645 0.010318949 0.008442776 0.008442776 0.007817386 0.005941213 0.005941213 0.005941213 0.009068168 0.010318949 0.010631645 0.010318949 0.009380863 0.009693558 0.009693558 0.010631645 0.009068168 0.009693558 0.010318949 0.009693558 0.009693558 0.010006254 0.010006254 0.009380863 0.009693558 0.010006254 0.009693558 0.0087554725 0.01094434 0.009693558 0.010318949 0.011257036 0.010006254 0.010631645 0.010006254 0.010006254 0.010318949 0.011569731 0.009380863 0.009068168 0.0087554725 0.0087554725 0.0087554725 0.0075046904 0.008130081 0.010006254 0.008442776 0.0087554725 0.009068168 0.008130081 0.009380863 0.008442776 0.009693558 0.0087554725 0.009693558 0.0087554725 0.0087554725 0.009380863 0.009068168 0.008442776 0.0087554725 0.010006254 0.010006254 0.009380863 0.009693558 0.009380863 0.01438399 0.014696686 0.014696686 0.0087554725 0.007817386 0.007817386 0.011257036 0.010631645 0.010631645
[9] 'ST982'    0.07661038 0.07692308 0.07786116 0.07692308 0.0046904315 0.0021888681 0.0025015634 0.002814259 0.0 0.0087554725 0.006253909 0.0087554725 0.009068168 0.0087554725 0.005628518 0.008130081 0.0087554725 0.0068792994 0.0068792994 0.0068792994 0.010006254 0.0087554725 0.009068168 0.0087554725 0.007817386 0.0087554725 0.008130081 0.009068168 0.0075046904 0.008130081 0.009380863 0.008130081 0.008130081 0.008442776 0.008442776 0.007817386 0.008130081 0.008442776 0.008130081 0.005941213 0.010006254 0.008130081 0.0087554725 0.010318949 0.008442776 0.009068168 0.008442776 0.008442776 0.0087554725 0.010006254 0.007817386 0.006253909 0.005941213 0.005941213 0.009693558 0.008442776 0.005941213 0.009068168 0.009380863 0.005941213 0.006253909 0.0053158225 0.007817386 0.005628518 0.008130081 0.009693558 0.008130081 0.005941213 0.009693558 0.007191995 0.0068792994 0.006253909 0.005941213 0.007817386 0.007817386 0.007191995 0.0075046904 0.007191995 0.014071294 0.01438399 0.01438399 0.009068168 0.005003127 0.005003127 0.009693558 0.009068168 0.009693558
[10] 'ST154'    0.076297686 0.07723577 0.07754847 0.07723577 0.006566604 0.009068168 0.009380863 0.009693558 0.0087554725 0.0 0.0037523452 0.0075046904 0.005941213 0.005628518 0.006253909 0.005628518 0.012507818 0.010006254 0.009380863 0.009380863 0.011882426 0.005003127 0.0053158225 0.005628518 0.0046904315 0.005628518 0.005003127 0.0053158225 0.0068792994 0.005003127 0.008130081 0.005628518 0.005003127 0.0053158225 0.0053158225 0.0046904315 0.005003127 0.0046904315 0.005003127 0.005941213 0.005003127 0.005003127 0.005003127 0.0053158225 0.0053158225 0.0053158225 0.0053158225 0.0053158225 0.0068792994 0.006253909 0.0034396497 0.006253909 0.005941213 0.005941213 0.011569731 0.011569731 0.0053158225 0.0040650405 0.011257036 0.005941213 0.006253909 0.0053158225 0.0021888681 0.005628518 0.0043777362 0.011569731 0.005003127 0.005941213 0.011569731 0.006566604 0.006253909 0.005628518 0.005941213 0.0053158225 0.005941213 0.0053158225 0.005003127 0.0046904315 0.014696686 0.015009381 0.015009381 0.009693558 0.0068792994 0.0068792994 0.005941213 0.0053158225 0.008442776
[11] 'ST6'      0.07473421 0.0756723 0.07598499 0.075046904 0.0046904315 0.007817386 0.008130081 0.008442776 0.006253909 0.0037523452 0.0 0.0043777362 0.006566604 0.006253909 0.0031269544 0.0043777362 0.011257036 0.0087554725 0.008130081 0.008130081 0.010006254 0.005628518 0.005941213 0.0037523452 0.005941213 0.005628518 0.0031269544 0.005941213 0.005628518 0.0031269544 0.0087554725 0.0043777362 0.0031269544 0.0034396497 0.0034396497 0.002814259 0.0031269544 0.0053158225 0.0031269544 0.002814259 0.0068792994 0.0031269544 0.005628518 0.007191995 0.0034396497 0.005941213 0.0034396497 0.0034396497 0.006253909 0.0068792994 0.0034396497 0.0043777362 0.0040650405 0.0040650405 0.009693558 0.010318949 0.0034396497 0.005941213 0.009380863 0.0040650405 0.0043777362 0.0021888681 0.0040650405 0.0037523452 0.005003127 0.009693558 0.0043777362 0.0040650405 0.009693558 0.0053158225 0.005003127 0.0037523452 0.0040650405 0.0053158225 0.0046904315 0.0053158225 0.005003127 0.0046904315 0.014071294 0.01438399 0.01438399 0.009693558 0.005003127 0.005003127 0.006566604 0.005941213 0.009068168
[12] 'ST20'     0.07754847 0.07911195 0.07879925 0.078486554 0.006566604 0.01094434 0.011257036 0.011569731 0.0087554725 0.0075046904 0.0043777362 0.0 0.005941213 0.005628518 0.0037523452 0.0043777362 0.012507818 0.010006254 0.011257036 0.011257036 0.013133208 0.006253909 0.006566604 0.005003127 0.006566604 0.0043777362 0.0043777362 0.006566604 0.005628518 0.0043777362 0.0075046904 0.005628518 0.0043777362 0.0046904315 0.0046904315 0.0040650405 0.0043777362 0.006566604 0.0043777362 0.002814259 0.005628518 0.0043777362 0.0068792994 0.005941213 0.0046904315 0.006566604 0.0046904315 0.0046904315 0.0075046904 0.0068792994 0.0053158225 0.006253909 0.005941213 0.005941213 0.012820513 0.013445904 0.005941213 0.006566604 0.012507818 0.005941213 0.006253909 0.0046904315 0.006566604 0.005628518 0.0075046904 0.012820513 0.006253909 0.005941213 0.012820513 0.005941213 0.005628518 0.006253909 0.005941213 0.007191995 0.006566604 0.007191995 0.0068792994 0.006566604 0.01719825 0.017510945 0.017510945 0.010318949 0.0068792994 0.0068792994 0.006566604 0.006566604 0.007817386
[13] 'ST361'    0.076297686 0.078486554 0.07754847 0.07786116 0.0043777362 0.010006254 0.010318949 0.010631645 0.009068168 0.005941213 0.006566604 0.005941213 0.0 3.1269543E-4 0.0053158225 0.007191995 0.011569731 0.009068168 0.010318949 0.010318949 0.0121951215 0.0053158225 0.005628518 0.007191995 0.0043777362 0.0040650405 0.006566604 0.005628518 0.002814259 0.006566604 0.006566604 0.0046904315 0.006566604 0.0068792994 0.0068792994 0.006253909 0.006566604 0.005003127 0.006566604 0.005003127 0.0034396497 0.006566604 0.0053158225 0.0037523452 0.0068792994 0.005628518 0.0068792994 0.0068792994 0.005941213 0.006566604 0.008130081 0.0040650405 0.0037523452 0.0037523452 0.011882426 0.012507818 0.0037523452 0.0043777362 0.011569731 0.0037523452 0.0040650405 0.006253909 0.0068792994 0.0034396497 0.006566604 0.011882426 0.0053158225 0.0037523452 0.011882426 0.006253909 0.005941213 0.0040650405 0.0037523452 0.008130081 0.0068792994 0.0075046904 0.007817386 0.0075046904 0.015634771 0.015947467 0.015947467 0.0087554725 0.0046904315 0.0046904315 0.006253909 0.005628518 0.0068792994
[14] 'ST672'    0.07598499 0.07817386 0.07723577 0.07754847 0.0040650405 0.009693558 0.010006254 0.010318949 0.0087554725 0.005628518 0.006253909 0.005628518 3.1269543E-4 0.0 0.005003127 0.0068792994 0.011257036 0.0087554725 0.010006254 0.010006254 0.011882426 0.005003127 0.0053158225 0.0068792994 0.0040650405 0.0037523452 0.006253909 0.0053158225 0.0025015634 0.006253909 0.0068792994 0.0043777362 0.006253909 0.006566604 0.006566604 0.005941213 0.006253909 0.0046904315 0.006253909 0.0046904315 0.0031269544 0.006253909 0.005003127 0.0034396497 0.006566604 0.0053158225 0.006566604 0.006566604 0.005628518 0.006253909 0.007817386 0.0037523452 0.0034396497 0.0034396497 0.011569731 0.0121951215 0.0034396497 0.0040650405 0.011257036 0.0034396497 0.0037523452 0.005941213 0.006566604 0.0031269544 0.006253909 0.011569731 0.005003127 0.0034396497 0.011569731 0.005941213 0.005628518 0.0037523452 0.0034396497 0.007817386 0.006566604 0.007191995 0.0075046904 0.007191995 0.015322076 0.015634771 0.015634771 0.008442776 0.0043777362 0.0043777362 0.005941213 0.0053158225 0.007191995
[15] 'ST1048'   0.076297686 0.07723577 0.07754847 0.07661038 0.0040650405 0.007817386 0.008130081 0.008442776 0.005628518 0.006253909 0.0031269544 0.0037523452 0.0053158225 0.005003127 0.0 0.0037523452 0.009380863 0.0068792994 0.0087554725 0.0087554725 0.010631645 0.005628518 0.005941213 0.0037523452 0.0046904315 0.0037523452 0.0031269544 0.005941213 0.0037523452 0.0031269544 0.0075046904 0.0043777362 0.0031269544 0.0034396497 0.0034396497 0.002814259 0.0031269544 0.0053158225 0.0031269544 9.380863E-4 0.005003127 0.0031269544 0.005628518 0.0053158225 0.0034396497 0.005941213 0.0034396497 0.0034396497 0.006253909 0.0068792994 0.0053158225 0.0043777362 0.0040650405 0.0040650405 0.010318949 0.01094434 0.0040650405 0.005941213 0.010006254 0.0040650405 0.0043777362 0.0015634772 0.0053158225 0.0037523452 0.0068792994 0.010318949 0.006253909 0.0040650405 0.010318949 0.005941213 0.005628518 0.0043777362 0.0040650405 0.005941213 0.0053158225 0.005941213 0.005628518 0.0053158225 0.014071294 0.01438399 0.01438399 0.008442776 0.0043777362 0.0043777362 0.006566604 0.005941213 0.007817386
[16] 'ST1774'   0.07661038 0.07754847 0.07786116 0.07754847 0.006566604 0.007817386 0.008130081 0.008442776 0.008130081 0.005628518 0.0043777362 0.0043777362 0.007191995 0.0068792994 0.0037523452 0.0 0.009380863 0.0068792994 0.0087554725 0.0087554725 0.011257036 0.0037523452 0.0040650405 0.0043777362 0.0046904315 0.005003127 0.0037523452 0.0040650405 0.006253909 0.0037523452 0.008130081 0.005003127 0.0037523452 0.0040650405 0.0040650405 0.0034396497 0.0037523452 0.0040650405 0.0037523452 0.0034396497 0.0068792994 0.0037523452 0.0043777362 0.007191995 0.0040650405 0.0040650405 0.0040650405 0.0040650405 0.005628518 0.005003127 0.002814259 0.0068792994 0.006566604 0.006566604 0.01094434 0.01094434 0.005941213 0.007817386 0.010631645 0.006566604 0.0068792994 0.0053158225 0.0046904315 0.006253909 0.005003127 0.01094434 0.005628518 0.006566604 0.01094434 0.005941213 0.005628518 0.006253909 0.006566604 0.005941213 0.006566604 0.005941213 0.005628518 0.0053158225 0.015322076 0.015634771 0.015634771 0.009068168 0.0068792994 0.0068792994 0.0046904315 0.0040650405 0.008442776
[17] 'ST426'    0.07817386 0.078486554 0.07942464 0.078486554 0.011569731 0.007191995 0.0075046904 0.007817386 0.0087554725 0.012507818 0.011257036 0.012507818 0.011569731 0.011257036 0.009380863 0.009380863 0.0 0.0025015634 0.0075046904 0.0075046904 0.009068168 0.011257036 0.011569731 0.011257036 0.010318949 0.010631645 0.010631645 0.011569731 0.010631645 0.010631645 0.011257036 0.010631645 0.010631645 0.01094434 0.01094434 0.010318949 0.010631645 0.01094434 0.010631645 0.009693558 0.011882426 0.010631645 0.011257036 0.0121951215 0.01094434 0.011569731 0.01094434 0.01094434 0.011257036 0.012507818 0.0121951215 0.011882426 0.011569731 0.01094434 0.009068168 0.005941213 0.01094434 0.012820513 0.0087554725 0.011569731 0.011882426 0.01094434 0.0121951215 0.011257036 0.012507818 0.009068168 0.012507818 0.011569731 0.009068168 0.0121951215 0.011882426 0.011257036 0.011569731 0.012820513 0.012820513 0.0121951215 0.012507818 0.0121951215 0.014696686 0.015009381 0.015009381 0.008442776 0.011882426 0.011882426 0.0121951215 0.011569731 0.011569731
[18] 'ST45'     0.076297686 0.07661038 0.07754847 0.07661038 0.009068168 0.0053158225 0.005628518 0.005941213 0.0068792994 0.010006254 0.0087554725 0.010006254 0.009068168 0.0087554725 0.0068792994 0.0068792994 0.0025015634 0.0 0.006253909 0.006253909 0.009068168 0.0087554725 0.009068168 0.0087554725 0.007817386 0.008130081 0.008130081 0.009068168 0.008130081 0.008130081 0.009380863 0.008130081 0.008130081 0.008442776 0.008442776 0.007817386 0.008130081 0.008442776 0.008130081 0.007191995 0.009380863 0.008130081 0.0087554725 0.009693558 0.008442776 0.009068168 0.008442776 0.008442776 0.0087554725 0.010006254 0.009693558 0.009380863 0.009068168 0.008442776 0.009068168 0.005941213 0.008442776 0.010318949 0.0087554725 0.009068168 0.009380863 0.008442776 0.009693558 0.0087554725 0.010006254 0.009068168 0.010006254 0.009068168 0.009068168 0.009693558 0.009380863 0.0087554725 0.009068168 0.010318949 0.010318949 0.009693558 0.010006254 0.009693558 0.014071294 0.01438399 0.01438399 0.006566604 0.009380863 0.009380863 0.009693558 0.009068168 0.009693558
[19] 'ST121'    0.07661038 0.07692308 0.07786116 0.07692308 0.009068168 0.0053158225 0.005628518 0.005941213 0.0068792994 0.009380863 0.008130081 0.011257036 0.010318949 0.010006254 0.0087554725 0.0087554725 0.0075046904 0.006253909 0.0 6.2539085E-4 0.006566604 0.010006254 0.010318949 0.010006254 0.009068168 0.009380863 0.009380863 0.010318949 0.009380863 0.009380863 0.010006254 0.009380863 0.009380863 0.009693558 0.009693558 0.009068168 0.009380863 0.009693558 0.009380863 0.008442776 0.010631645 0.009380863 0.010006254 0.01094434 0.009693558 0.010318949 0.009693558 0.009693558 0.010006254 0.011257036 0.009068168 0.0087554725 0.008442776 0.008442776 0.007191995 0.006566604 0.007817386 0.009693558 0.0068792994 0.008442776 0.0087554725 0.007817386 0.009068168 0.008130081 0.009380863 0.007191995 0.009380863 0.008442776 0.007191995 0.009068168 0.0087554725 0.008130081 0.008442776 0.009693558 0.009693558 0.009068168 0.009380863 0.009068168 0.013445904 0.013758599 0.013758599 0.007817386 0.009380863 0.009380863 0.01094434 0.010318949 0.010318949
[20] 'ST577'    0.07723577 0.07754847 0.078486554 0.07754847 0.009068168 0.0053158225 0.005628518 0.005941213 0.0068792994 0.009380863 0.008130081 0.011257036 0.010318949 0.010006254 0.0087554725 0.0087554725 0.0075046904 0.006253909 6.2539085E-4 0.0 0.006566604 0.010006254 0.010318949 0.010006254 0.009068168 0.009380863 0.009380863 0.010318949 0.009380863 0.009380863 0.010006254 0.009380863 0.009380863 0.009693558 0.009693558 0.009068168 0.009380863 0.009693558 0.009380863 0.008442776 0.010631645 0.009380863 0.010006254 0.01094434 0.009693558 0.010318949 0.009693558 0.009693558 0.010006254 0.011257036 0.009068168 0.0087554725 0.008442776 0.008442776 0.007191995 0.006566604 0.007817386 0.009693558 0.0068792994 0.008442776 0.0087554725 0.007817386 0.009068168 0.008130081 0.009380863 0.007191995 0.009380863 0.008442776 0.007191995 0.009068168 0.0087554725 0.008130081 0.008442776 0.009693558 0.009693558 0.009068168 0.009380863 0.009068168 0.013445904 0.013758599 0.013758599 0.007817386 0.009380863 0.009380863 0.01094434 0.010318949 0.010318949
[21] 'ST93'     0.07692308 0.07786116 0.07817386 0.07661038 0.01094434 0.008442776 0.0087554725 0.009068168 0.010006254 0.011882426 0.010006254 0.013133208 0.0121951215 0.011882426 0.010631645 0.011257036 0.009068168 0.009068168 0.006566604 0.006566604 0.0 0.012507818 0.012820513 0.011882426 0.011569731 0.011257036 0.011257036 0.012820513 0.011257036 0.011257036 0.013133208 0.011257036 0.011257036 0.011569731 0.011569731 0.01094434 0.011257036 0.0121951215 0.011257036 0.010318949 0.012507818 0.011257036 0.012507818 0.012820513 0.011569731 0.012820513 0.011569731 0.011569731 0.012507818 0.013758599 0.011569731 0.010631645 0.010318949 0.010318949 0.005941213 0.008130081 0.009693558 0.011569731 0.005628518 0.010318949 0.010631645 0.009693558 0.011569731 0.010006254 0.011882426 0.005941213 0.011257036 0.010318949 0.005941213 0.011569731 0.011257036 0.010006254 0.010318949 0.0121951215 0.011569731 0.011569731 0.011882426 0.011569731 0.01438399 0.014696686 0.014696686 0.011257036 0.011257036 0.011257036 0.013445904 0.012820513 0.013445904
[22] 'ST1'      0.07661038 0.07817386 0.078486554 0.07817386 0.0053158225 0.009693558 0.010006254 0.010318949 0.0087554725 0.005003127 0.005628518 0.006253909 0.0053158225 0.005003127 0.005628518 0.0037523452 0.011257036 0.0087554725 0.010006254 0.010006254 0.012507818 0.0 3.1269543E-4 0.0043777362 9.380863E-4 0.0068792994 0.0037523452 3.1269543E-4 0.0043777362 0.0037523452 0.008130081 0.0018761726 0.0037523452 0.0040650405 0.0040650405 0.0034396497 0.0037523452 3.1269543E-4 0.0037523452 0.0053158225 0.005003127 0.0037523452 6.2539085E-4 0.0053158225 0.0040650405 3.1269543E-4 0.0040650405 0.0040650405 0.0031269544 0.0018761726 0.002814259 0.005003127 0.0046904315 0.0046904315 0.0121951215 0.0121951215 0.0040650405 0.005941213 0.011882426 0.0046904315 0.005003127 0.006566604 0.0040650405 0.0043777362 0.0018761726 0.0121951215 0.0025015634 0.0046904315 0.0121951215 0.0040650405 0.0037523452 0.0043777362 0.0046904315 0.0046904315 0.0053158225 0.0040650405 0.0043777362 0.0040650405 0.015322076 0.015634771 0.015634771 0.009693558 0.005628518 0.005628518 0.0015634772 9.380863E-4 0.008442776
[23] 'ST1005'   0.07692308 0.078486554 0.07879925 0.078486554 0.005628518 0.010006254 0.010318949 0.010631645 0.009068168 0.0053158225 0.005941213 0.006566604 0.005628518 0.0053158225 0.005941213 0.0040650405 0.011569731 0.009068168 0.010318949 0.010318949 0.012820513 3.1269543E-4 0.0 0.0046904315 0.0012507817 0.007191995 0.0040650405 6.2539085E-4 0.0046904315 0.0040650405 0.008442776 0.0021888681 0.0040650405 0.0043777362 0.0043777362 0.0037523452 0.0040650405 6.2539085E-4 0.0040650405 0.005628518 0.0053158225 0.0040650405 3.1269543E-4 0.005628518 0.0043777362 6.2539085E-4 0.0043777362 0.0043777362 0.0034396497 0.0021888681 0.0031269544 0.0053158225 0.005003127 0.005003127 0.012507818 0.012507818 0.0043777362 0.006253909 0.0121951215 0.005003127 0.0053158225 0.0068792994 0.0043777362 0.0046904315 0.0021888681 0.012507818 0.002814259 0.005003127 0.012507818 0.0043777362 0.0040650405 0.0046904315 0.005003127 0.005003127 0.005628518 0.0043777362 0.0046904315 0.0043777362 0.015634771 0.015947467 0.015947467 0.010006254 0.005941213 0.005941213 0.0018761726 0.0012507817 0.0087554725
[24] 'ST111'    0.07661038 0.07754847 0.07786116 0.07692308 0.007191995 0.009693558 0.010006254 0.010318949 0.0087554725 0.005628518 0.0037523452 0.005003127 0.007191995 0.0068792994 0.0037523452 0.0043777362 0.011257036 0.0087554725 0.010006254 0.010006254 0.011882426 0.0043777362 0.0046904315 0.0 0.0046904315 0.005628518 0.0012507817 0.0046904315 0.006253909 0.0012507817 0.0087554725 0.0025015634 0.0012507817 3.1269543E-4 0.0015634772 9.380863E-4 0.0012507817 0.0040650405 0.0012507817 0.0034396497 0.005003127 0.0012507817 0.0043777362 0.0053158225 0.0015634772 0.0046904315 0.0015634772 0.0015634772 0.005628518 0.005628518 0.0040650405 0.0068792994 0.006566604 0.006566604 0.011569731 0.011882426 0.005941213 0.005941213 0.011257036 0.006566604 0.0068792994 0.0046904315 0.0040650405 0.006253909 0.005628518 0.011569731 0.0043777362 0.006566604 0.011569731 0.007817386 0.0075046904 0.006253909 0.006566604 0.005941213 0.0053158225 0.005941213 0.005628518 0.0053158225 0.015634771 0.015947467 0.015947467 0.009693558 0.0075046904 0.0075046904 0.0053158225 0.0046904315 0.009068168
[25] 'ST1115'   0.07661038 0.07817386 0.078486554 0.07817386 0.0043777362 0.0087554725 0.009068168 0.009380863 0.007817386 0.0046904315 0.005941213 0.006566604 0.0043777362 0.0040650405 0.0046904315 0.0046904315 0.010318949 0.007817386 0.009068168 0.009068168 0.011569731 9.380863E-4 0.0012507817 0.0046904315 0.0 0.005941213 0.0040650405 0.0012507817 0.0034396497 0.0040650405 0.007817386 0.0021888681 0.0040650405 0.0043777362 0.0043777362 0.0037523452 0.0040650405 6.2539085E-4 0.0040650405 0.0043777362 0.0040650405 0.0040650405 9.380863E-4 0.0043777362 0.0043777362 0.0012507817 0.0043777362 0.0043777362 0.0034396497 0.002814259 0.0037523452 0.0040650405 0.0037523452 0.0037523452 0.011257036 0.011257036 0.0031269544 0.005003127 0.01094434 0.0037523452 0.0040650405 0.005628518 0.0037523452 0.0034396497 0.002814259 0.011257036 0.0034396497 0.0037523452 0.011257036 0.0043777362 0.0040650405 0.0034396497 0.0037523452 0.0043777362 0.005003127 0.0037523452 0.0040650405 0.0037523452 0.01438399 0.014696686 0.014696686 0.0087554725 0.0046904315 0.0046904315 0.0025015634 0.0018761726 0.008130081
[26] 'ST12'     0.076297686 0.07786116 0.07692308 0.07723577 0.005941213 0.009068168 0.009380863 0.009693558 0.0087554725 0.005628518 0.005628518 0.0043777362 0.0040650405 0.0037523452 0.0037523452 0.005003127 0.010631645 0.008130081 0.009380863 0.009380863 0.011257036 0.0068792994 0.007191995 0.005628518 0.005941213 0.0 0.005003127 0.007191995 0.0043777362 0.005003127 0.005003127 0.006253909 0.005003127 0.0053158225 0.0053158225 0.0046904315 0.005003127 0.006566604 0.005003127 0.002814259 0.0025015634 0.005003127 0.0068792994 0.002814259 0.0053158225 0.007191995 0.0053158225 0.0053158225 0.0075046904 0.008130081 0.005941213 0.005628518 0.0053158225 0.0053158225 0.01094434 0.011569731 0.0053158225 0.0034396497 0.010631645 0.0053158225 0.005628518 0.0046904315 0.005941213 0.005003127 0.008130081 0.01094434 0.0068792994 0.0053158225 0.01094434 0.005941213 0.005628518 0.005628518 0.0053158225 0.007191995 0.005941213 0.007191995 0.0068792994 0.006566604 0.015322076 0.015634771 0.015634771 0.006566604 0.006253909 0.006253909 0.007817386 0.007191995 0.0053158225
[27] 'ST125'    0.07661038 0.07754847 0.07786116 0.07692308 0.006566604 0.009068168 0.009380863 0.009693558 0.008130081 0.005003127 0.0031269544 0.0043777362 0.006566604 0.006253909 0.0031269544 0.0037523452 0.010631645 0.008130081 0.009380863 0.009380863 0.011257036 0.0037523452 0.0040650405 0.0012507817 0.0040650405 0.005003127 0.0 0.0040650405 0.005628518 6.2539085E-4 0.008130081 0.0018761726 6.2539085E-4 9.380863E-4 9.380863E-4 3.1269543E-4 6.2539085E-4 0.0034396497 6.2539085E-4 0.002814259 0.0043777362 6.2539085E-4 0.0037523452 0.0046904315 9.380863E-4 0.0040650405 9.380863E-4 3.1269543E-4 0.005003127 0.005003127 0.0034396497 0.006253909 0.005941213 0.005941213 0.01094434 0.011569731 0.0053158225 0.0053158225 0.010631645 0.005941213 0.006253909 0.0040650405 0.0034396497 0.005628518 0.005003127 0.01094434 0.0037523452 0.005941213 0.01094434 0.007191995 0.0068792994 0.005628518 0.005941213 0.0053158225 0.0046904315 0.0053158225 0.005003127 0.0046904315 0.015322076 0.015634771 0.015634771 0.009068168 0.0068792994 0.0068792994 0.0046904315 0.0040650405 0.008442776
[28] 'ST1336'   0.07692308 0.078486554 0.07879925 0.078486554 0.005628518 0.010006254 0.010318949 0.010631645 0.009068168 0.0053158225 0.005941213 0.006566604 0.005628518 0.0053158225 0.005941213 0.0040650405 0.011569731 0.009068168 0.010318949 0.010318949 0.012820513 3.1269543E-4 6.2539085E-4 0.0046904315 0.0012507817 0.007191995 0.0040650405 0.0 0.0046904315 0.0040650405 0.008442776 0.0021888681 0.0040650405 0.0043777362 0.0043777362 0.0037523452 0.0040650405 6.2539085E-4 0.0040650405 0.005628518 0.0053158225 0.0040650405 9.380863E-4 0.005628518 0.0043777362 6.2539085E-4 0.0043777362 0.0043777362 0.0034396497 0.0021888681 0.0031269544 0.0053158225 0.005003127 0.005003127 0.012507818 0.012507818 0.0043777362 0.006253909 0.0121951215 0.005003127 0.0053158225 0.0068792994 0.0043777362 0.0046904315 0.0021888681 0.012507818 0.002814259 0.005003127 0.012507818 0.0043777362 0.0040650405 0.0046904315 0.005003127 0.005003127 0.005628518 0.0043777362 0.0046904315 0.0043777362 0.015634771 0.015947467 0.015947467 0.010006254 0.005941213 0.005941213 0.0018761726 0.0012507817 0.0087554725
[29] 'ST1337'   0.0756723 0.07786116 0.07692308 0.07723577 0.002814259 0.008442776 0.008130081 0.009068168 0.0075046904 0.0068792994 0.005628518 0.005628518 0.002814259 0.0025015634 0.0037523452 0.006253909 0.010631645 0.008130081 0.009380863 0.009380863 0.011257036 0.0043777362 0.0046904315 0.006253909 0.0034396497 0.0043777362 0.005628518 0.0046904315 0.0 0.005628518 0.0075046904 0.0037523452 0.005628518 0.005941213 0.005941213 0.0053158225 0.005628518 0.0040650405 0.005628518 0.0034396497 0.0037523452 0.005628518 0.0043777362 0.0040650405 0.005941213 0.0046904315 0.005941213 0.005941213 0.005003127 0.005628518 0.007191995 0.0025015634 0.0021888681 0.0021888681 0.01094434 0.011569731 0.0021888681 0.0046904315 0.010631645 0.0021888681 0.0025015634 0.0046904315 0.006566604 0.0018761726 0.005628518 0.01094434 0.0043777362 0.0021888681 0.01094434 0.0046904315 0.0043777362 0.0025015634 0.0021888681 0.007191995 0.005941213 0.006566604 0.0068792994 0.006566604 0.014696686 0.015009381 0.015009381 0.009068168 0.0031269544 0.0031269544 0.0053158225 0.0046904315 0.007817386
[30] 'ST149'    0.07661038 0.07754847 0.07786116 0.07692308 0.006566604 0.009068168 0.009380863 0.009693558 0.008130081 0.005003127 0.0031269544 0.0043777362 0.006566604 0.006253909 0.0031269544 0.0037523452 0.010631645 0.008130081 0.009380863 0.009380863 0.011257036 0.0037523452 0.0040650405 0.0012507817 0.0040650405 0.005003127 6.2539085E-4 0.0040650405 0.005628518 0.0 0.008130081 0.0018761726 6.2539085E-4 9.380863E-4 9.380863E-4 3.1269543E-4 6.2539085E-4 0.0034396497 6.2539085E-4 0.002814259 0.0043777362 6.2539085E-4 0.0037523452 0.0046904315 9.380863E-4 0.0040650405 9.380863E-4 9.380863E-4 0.005003127 0.005003127 0.0034396497 0.006253909 0.005941213 0.005941213 0.01094434 0.011569731 0.0053158225 0.0053158225 0.010631645 0.005941213 0.006253909 0.0040650405 0.0034396497 0.005628518 0.005003127 0.01094434 0.0037523452 0.005941213 0.01094434 0.007191995 0.0068792994 0.005628518 0.005941213 0.0053158225 0.0046904315 0.0053158225 0.005003127 0.0046904315 0.015322076 0.015634771 0.015634771 0.009068168 0.0068792994 0.0068792994 0.0046904315 0.0040650405 0.008442776
[31] 'ST22'     0.07786116 0.07879925 0.07911195 0.07879925 0.009068168 0.009693558 0.010006254 0.010318949 0.009380863 0.008130081 0.0087554725 0.0075046904 0.006566604 0.0068792994 0.0075046904 0.008130081 0.011257036 0.009380863 0.010006254 0.010006254 0.013133208 0.008130081 0.008442776 0.0087554725 0.007817386 0.005003127 0.008130081 0.008442776 0.0075046904 0.008130081 0.0 0.008130081 0.008130081 0.008442776 0.008442776 0.007817386 0.008130081 0.007817386 0.008130081 0.007191995 0.006253909 0.008130081 0.008130081 0.006566604 0.008442776 0.008442776 0.008442776 0.008442776 0.0087554725 0.0087554725 0.009068168 0.0087554725 0.008442776 0.008442776 0.012820513 0.0121951215 0.008442776 0.007191995 0.012507818 0.008442776 0.0087554725 0.008442776 0.008442776 0.008130081 0.009380863 0.012820513 0.009380863 0.008442776 0.012820513 0.007191995 0.0068792994 0.0087554725 0.008442776 0.009068168 0.009068168 0.009068168 0.0087554725 0.008442776 0.01719825 0.017510945 0.017510945 0.007191995 0.009380863 0.009380863 0.008442776 0.008442776 3.1269543E-4
[32] 'ST221'    0.07598499 0.07754847 0.07786116 0.07692308 0.0046904315 0.009068168 0.009380863 0.009693558 0.008130081 0.005628518 0.0043777362 0.005628518 0.0046904315 0.0043777362 0.0043777362 0.005003127 0.010631645 0.008130081 0.009380863 0.009380863 0.011257036 0.0018761726 0.0021888681 0.0025015634 0.0021888681 0.006253909 0.0018761726 0.0021888681 0.0037523452 0.0018761726 0.008130081 0.0 0.0018761726 0.0021888681 0.0021888681 0.0015634772 0.0018761726 0.0015634772 0.0018761726 0.0040650405 0.0037523452 0.0018761726 0.0018761726 0.0040650405 0.0021888681 0.0021888681 0.0021888681 0.0021888681 0.0031269544 0.0031269544 0.0046904315 0.0043777362 0.0040650405 0.0040650405 0.01094434 0.011569731 0.0034396497 0.0046904315 0.010631645 0.0040650405 0.0043777362 0.0053158225 0.0040650405 0.0037523452 0.0031269544 0.01094434 0.0018761726 0.0040650405 0.01094434 0.0053158225 0.005003127 0.0037523452 0.0040650405 0.005941213 0.0053158225 0.0053158225 0.005628518 0.0053158225 0.014696686 0.015009381 0.015009381 0.009068168 0.005003127 0.005003127 0.002814259 0.0021888681 0.008442776
[33] 'ST225'    0.07661038 0.07754847 0.07786116 0.07692308 0.006566604 0.009068168 0.009380863 0.009693558 0.008130081 0.005003127 0.0031269544 0.0043777362 0.006566604 0.006253909 0.0031269544 0.0037523452 0.010631645 0.008130081 0.009380863 0.009380863 0.011257036 0.0037523452 0.0040650405 0.0012507817 0.0040650405 0.005003127 6.2539085E-4 0.0040650405 0.005628518 6.2539085E-4 0.008130081 0.0018761726 0.0 9.380863E-4 9.380863E-4 3.1269543E-4 6.2539085E-4 0.0034396497 6.2539085E-4 0.002814259 0.0043777362 6.2539085E-4 0.0037523452 0.0046904315 9.380863E-4 0.0040650405 9.380863E-4 9.380863E-4 0.005003127 0.005003127 0.0034396497 0.006253909 0.005941213 0.005941213 0.01094434 0.011569731 0.0053158225 0.0053158225 0.010631645 0.005941213 0.006253909 0.0040650405 0.0034396497 0.005628518 0.005003127 0.01094434 0.0037523452 0.005941213 0.01094434 0.007191995 0.0068792994 0.005628518 0.005941213 0.0053158225 0.0046904315 0.0053158225 0.005003127 0.0046904315 0.015322076 0.015634771 0.015634771 0.009068168 0.0068792994 0.0068792994 0.0046904315 0.0040650405 0.008442776
[34] 'ST228'    0.076297686 0.07723577 0.07754847 0.07661038 0.0068792994 0.009380863 0.009693558 0.010006254 0.008442776 0.0053158225 0.0034396497 0.0046904315 0.0068792994 0.006566604 0.0034396497 0.0040650405 0.01094434 0.008442776 0.009693558 0.009693558 0.011569731 0.0040650405 0.0043777362 3.1269543E-4 0.0043777362 0.0053158225 9.380863E-4 0.0043777362 0.005941213 9.380863E-4 0.008442776 0.0021888681 9.380863E-4 0.0 0.0012507817 6.2539085E-4 9.380863E-4 0.0037523452 9.380863E-4 0.0031269544 0.0046904315 9.380863E-4 0.0040650405 0.005003127 0.0012507817 0.0043777362 0.0012507817 0.0012507817 0.0053158225 0.0053158225 0.0037523452 0.006566604 0.006253909 0.006253909 0.011257036 0.011569731 0.005628518 0.005628518 0.01094434 0.006253909 0.006566604 0.0043777362 0.0037523452 0.005941213 0.0053158225 0.011257036 0.0040650405 0.006253909 0.011257036 0.0075046904 0.007191995 0.005941213 0.006253909 0.005628518 0.005003127 0.005628518 0.0053158225 0.005003127 0.015322076 0.015634771 0.015634771 0.009380863 0.007191995 0.007191995 0.005003127 0.0043777362 0.0087554725
[35] 'ST496'    0.07692308 0.07786116 0.07817386 0.07723577 0.0068792994 0.009380863 0.009693558 0.010006254 0.008442776 0.0053158225 0.0034396497 0.0046904315 0.0068792994 0.006566604 0.0034396497 0.0040650405 0.01094434 0.008442776 0.009693558 0.009693558 0.011569731 0.0040650405 0.0043777362 0.0015634772 0.0043777362 0.0053158225 9.380863E-4 0.0043777362 0.005941213 9.380863E-4 0.008442776 0.0021888681 9.380863E-4 0.0012507817 0.0 6.2539085E-4 9.380863E-4 0.0037523452 3.1269543E-4 0.0031269544 0.0046904315 9.380863E-4 0.0040650405 0.005003127 0.0012507817 0.0043777362 0.0012507817 0.0012507817 0.0053158225 0.0053158225 0.0037523452 0.006566604 0.006253909 0.006253909 0.011257036 0.011882426 0.005628518 0.005628518 0.01094434 0.006253909 0.006566604 0.0043777362 0.0037523452 0.005941213 0.0053158225 0.011257036 0.0040650405 0.006253909 0.011257036 0.0075046904 0.007191995 0.005941213 0.006253909 0.005628518 0.005003127 0.005628518 0.0053158225 0.005003127 0.015634771 0.015947467 0.015947467 0.009380863 0.007191995 0.007191995 0.005003127 0.0043777362 0.0087554725
[36] 'ST5'      0.076297686 0.07723577 0.07754847 0.07661038 0.006253909 0.0087554725 0.009068168 0.009380863 0.007817386 0.0046904315 0.002814259 0.0040650405 0.006253909 0.005941213 0.002814259 0.0034396497 0.010318949 0.007817386 0.009068168 0.009068168 0.01094434 0.0034396497 0.0037523452 9.380863E-4 0.0037523452 0.0046904315 3.1269543E-4 0.0037523452 0.0053158225 3.1269543E-4 0.007817386 0.0015634772 3.1269543E-4 6.2539085E-4 6.2539085E-4 0.0 3.1269543E-4 0.0031269544 3.1269543E-4 0.0025015634 0.0040650405 3.1269543E-4 0.0034396497 0.0043777362 6.2539085E-4 0.0037523452 6.2539085E-4 6.2539085E-4 0.0046904315 0.0046904315 0.0031269544 0.005941213 0.005628518 0.005628518 0.010631645 0.011257036 0.005003127 0.005003127 0.010318949 0.005628518 0.005941213 0.0037523452 0.0031269544 0.0053158225 0.0046904315 0.010631645 0.0034396497 0.005628518 0.010631645 0.0068792994 0.006566604 0.0053158225 0.005628518 0.005003127 0.0043777362 0.005003127 0.0046904315 0.0043777362 0.015009381 0.015322076 0.015322076 0.0087554725 0.006566604 0.006566604 0.0043777362 0.0037523452 0.008130081
[37] 'ST526'    0.07661038 0.07754847 0.07786116 0.07692308 0.006566604 0.009068168 0.009380863 0.009693558 0.008130081 0.005003127 0.0031269544 0.0043777362 0.006566604 0.006253909 0.0031269544 0.0037523452 0.010631645 0.008130081 0.009380863 0.009380863 0.011257036 0.0037523452 0.0040650405 0.0012507817 0.0040650405 0.005003127 6.2539085E-4 0.0040650405 0.005628518 6.2539085E-4 0.008130081 0.0018761726 6.2539085E-4 9.380863E-4 9.380863E-4 3.1269543E-4 0.0 0.0034396497 6.2539085E-4 0.002814259 0.0043777362 6.2539085E-4 0.0037523452 0.0046904315 9.380863E-4 0.0040650405 9.380863E-4 9.380863E-4 0.005003127 0.005003127 0.0034396497 0.006253909 0.005941213 0.005941213 0.01094434 0.011569731 0.0053158225 0.0053158225 0.010631645 0.005941213 0.006253909 0.0040650405 0.0034396497 0.005628518 0.005003127 0.01094434 0.0037523452 0.005941213 0.01094434 0.007191995 0.0068792994 0.005628518 0.005941213 0.0053158225 0.0046904315 0.0053158225 0.005003127 0.0046904315 0.015322076 0.015634771 0.015634771 0.009068168 0.0068792994 0.0068792994 0.0046904315 0.0040650405 0.008442776
[38] 'ST573'    0.076297686 0.07786116 0.07817386 0.07786116 0.005003127 0.009380863 0.009693558 0.010006254 0.008442776 0.0046904315 0.0053158225 0.006566604 0.005003127 0.0046904315 0.0053158225 0.0040650405 0.01094434 0.008442776 0.009693558 0.009693558 0.0121951215 3.1269543E-4 6.2539085E-4 0.0040650405 6.2539085E-4 0.006566604 0.0034396497 6.2539085E-4 0.0040650405 0.0034396497 0.007817386 0.0015634772 0.0034396497 0.0037523452 0.0037523452 0.0031269544 0.0034396497 0.0 0.0034396497 0.005003127 0.0046904315 0.0034396497 3.1269543E-4 0.005003127 0.0037523452 6.2539085E-4 0.0037523452 0.0037523452 0.002814259 0.0021888681 0.0031269544 0.0046904315 0.0043777362 0.0043777362 0.011882426 0.011882426 0.0037523452 0.005628518 0.011569731 0.0043777362 0.0046904315 0.006253909 0.0037523452 0.0040650405 0.0021888681 0.011882426 0.002814259 0.0043777362 0.011882426 0.0043777362 0.0040650405 0.0040650405 0.0043777362 0.0043777362 0.005003127 0.0037523452 0.0040650405 0.0037523452 0.015009381 0.015322076 0.015322076 0.009380863 0.0053158225 0.0053158225 0.0018761726 0.0012507817 0.008130081
[39] 'ST575'    0.07661038 0.07754847 0.07786116 0.07692308 0.006566604 0.009068168 0.009380863 0.009693558 0.008130081 0.005003127 0.0031269544 0.0043777362 0.006566604 0.006253909 0.0031269544 0.0037523452 0.010631645 0.008130081 0.009380863 0.009380863 0.011257036 0.0037523452 0.0040650405 0.0012507817 0.0040650405 0.005003127 6.2539085E-4 0.0040650405 0.005628518 6.2539085E-4 0.008130081 0.0018761726 6.2539085E-4 9.380863E-4 3.1269543E-4 3.1269543E-4 6.2539085E-4 0.0034396497 0.0 0.002814259 0.0043777362 6.2539085E-4 0.0037523452 0.0046904315 9.380863E-4 0.0040650405 9.380863E-4 9.380863E-4 0.005003127 0.005003127 0.0034396497 0.006253909 0.005941213 0.005941213 0.01094434 0.011569731 0.0053158225 0.0053158225 0.010631645 0.005941213 0.006253909 0.0040650405 0.0034396497 0.005628518 0.005003127 0.01094434 0.0037523452 0.005941213 0.01094434 0.007191995 0.0068792994 0.005628518 0.005941213 0.0053158225 0.0046904315 0.0053158225 0.005003127 0.0046904315 0.015322076 0.015634771 0.015634771 0.009068168 0.0068792994 0.0068792994 0.0046904315 0.0040650405 0.008442776
[40] 'ST72'     0.07598499 0.07692308 0.07723577 0.076297686 0.0043777362 0.008130081 0.008442776 0.0087554725 0.005941213 0.005941213 0.002814259 0.002814259 0.005003127 0.0046904315 9.380863E-4 0.0034396497 0.009693558 0.007191995 0.008442776 0.008442776 0.010318949 0.0053158225 0.005628518 0.0034396497 0.0043777362 0.002814259 0.002814259 0.005628518 0.0034396497 0.002814259 0.007191995 0.0040650405 0.002814259 0.0031269544 0.0031269544 0.0025015634 0.002814259 0.005003127 0.002814259 0.0 0.0046904315 0.002814259 0.0053158225 0.005003127 0.0031269544 0.005628518 0.0031269544 0.0031269544 0.005941213 0.006566604 0.0043777362 0.0040650405 0.0037523452 0.0037523452 0.010006254 0.010631645 0.0037523452 0.005628518 0.009693558 0.0037523452 0.0040650405 0.0018761726 0.005003127 0.0034396497 0.006566604 0.010006254 0.005941213 0.0037523452 0.010006254 0.005628518 0.0053158225 0.0040650405 0.0037523452 0.005628518 0.005003127 0.005628518 0.0053158225 0.005003127 0.01438399 0.014696686 0.014696686 0.008130081 0.0046904315 0.0046904315 0.006253909 0.005628518 0.0075046904
[41] 'ST728'    0.07692308 0.07911195 0.07817386 0.078486554 0.0053158225 0.010318949 0.010631645 0.01094434 0.010006254 0.005003127 0.0068792994 0.005628518 0.0034396497 0.0031269544 0.005003127 0.0068792994 0.011882426 0.009380863 0.010631645 0.010631645 0.012507818 0.005003127 0.0053158225 0.005003127 0.0040650405 0.0025015634 0.0043777362 0.0053158225 0.0037523452 0.0043777362 0.006253909 0.0037523452 0.0043777362 0.0046904315 0.0046904315 0.0040650405 0.0043777362 0.0046904315 0.0043777362 0.0046904315 0.0 0.0043777362 0.005003127 3.1269543E-4 0.0046904315 0.0053158225 0.0046904315 0.0046904315 0.006253909 0.006253909 0.006566604 0.005003127 0.0046904315 0.0046904315 0.0121951215 0.012820513 0.0046904315 9.380863E-4 0.011882426 0.0046904315 0.005003127 0.005941213 0.0046904315 0.0043777362 0.006253909 0.0121951215 0.0043777362 0.0046904315 0.0121951215 0.005941213 0.005628518 0.005003127 0.0046904315 0.007191995 0.005941213 0.007191995 0.0068792994 0.006566604 0.015947467 0.016260162 0.016260162 0.008442776 0.005628518 0.005628518 0.005941213 0.0053158225 0.006566604
[42] 'ST73'     0.07661038 0.07754847 0.07786116 0.07692308 0.006566604 0.009068168 0.009380863 0.009693558 0.008130081 0.005003127 0.0031269544 0.0043777362 0.006566604 0.006253909 0.0031269544 0.0037523452 0.010631645 0.008130081 0.009380863 0.009380863 0.011257036 0.0037523452 0.0040650405 0.0012507817 0.0040650405 0.005003127 6.2539085E-4 0.0040650405 0.005628518 6.2539085E-4 0.008130081 0.0018761726 6.2539085E-4 9.380863E-4 9.380863E-4 3.1269543E-4 6.2539085E-4 0.0034396497 6.2539085E-4 0.002814259 0.0043777362 0.0 0.0037523452 0.0046904315 9.380863E-4 0.0040650405 9.380863E-4 9.380863E-4 0.005003127 0.005003127 0.0034396497 0.006253909 0.005941213 0.005941213 0.01094434 0.011569731 0.0053158225 0.0053158225 0.010631645 0.005941213 0.006253909 0.0040650405 0.0034396497 0.005628518 0.005003127 0.01094434 0.0037523452 0.005941213 0.01094434 0.007191995 0.0068792994 0.005628518 0.005941213 0.0053158225 0.0046904315 0.0053158225 0.005003127 0.0046904315 0.015322076 0.015634771 0.015634771 0.009068168 0.0068792994 0.0068792994 0.0046904315 0.0040650405 0.008442776
[43] 'ST772'    0.07661038 0.07817386 0.078486554 0.07817386 0.0053158225 0.009693558 0.010006254 0.010318949 0.0087554725 0.005003127 0.005628518 0.0068792994 0.0053158225 0.005003127 0.005628518 0.0043777362 0.011257036 0.0087554725 0.010006254 0.010006254 0.012507818 6.2539085E-4 3.1269543E-4 0.0043777362 9.380863E-4 0.0068792994 0.0037523452 9.380863E-4 0.0043777362 0.0037523452 0.008130081 0.0018761726 0.0037523452 0.0040650405 0.0040650405 0.0034396497 0.0037523452 3.1269543E-4 0.0037523452 0.0053158225 0.005003127 0.0037523452 0.0 0.0053158225 0.0040650405 9.380863E-4 0.0040650405 0.0040650405 0.0031269544 0.0025015634 0.0034396497 0.005003127 0.0046904315 0.0046904315 0.0121951215 0.0121951215 0.0040650405 0.005941213 0.011882426 0.0046904315 0.005003127 0.006566604 0.0040650405 0.0043777362 0.0025015634 0.0121951215 0.0031269544 0.0046904315 0.0121951215 0.0046904315 0.0043777362 0.0043777362 0.0046904315 0.0046904315 0.0053158225 0.0040650405 0.0043777362 0.0040650405 0.015322076 0.015634771 0.015634771 0.009693558 0.005628518 0.005628518 0.0021888681 0.0015634772 0.008442776
[44] 'ST80'     0.07723577 0.07942464 0.078486554 0.07879925 0.005628518 0.010631645 0.01094434 0.011257036 0.010318949 0.0053158225 0.007191995 0.005941213 0.0037523452 0.0034396497 0.0053158225 0.007191995 0.0121951215 0.009693558 0.01094434 0.01094434 0.012820513 0.0053158225 0.005628518 0.0053158225 0.0043777362 0.002814259 0.0046904315 0.005628518 0.0040650405 0.0046904315 0.006566604 0.0040650405 0.0046904315 0.005003127 0.005003127 0.0043777362 0.0046904315 0.005003127 0.0046904315 0.005003127 3.1269543E-4 0.0046904315 0.0053158225 0.0 0.005003127 0.005628518 0.005003127 0.005003127 0.006566604 0.006566604 0.0068792994 0.0053158225 0.005003127 0.005003127 0.012507818 0.013133208 0.005003127 0.0012507817 0.0121951215 0.005003127 0.0053158225 0.006253909 0.005003127 0.0046904315 0.006566604 0.012507818 0.0046904315 0.005003127 0.012507818 0.006253909 0.005941213 0.0053158225 0.005003127 0.0075046904 0.006253909 0.0075046904 0.007191995 0.0068792994 0.016260162 0.016572857 0.016572857 0.0087554725 0.005941213 0.005941213 0.006253909 0.005628518 0.0068792994
[45] 'ST835'    0.076297686 0.07723577 0.07754847 0.07661038 0.0068792994 0.009380863 0.009693558 0.010006254 0.008442776 0.0053158225 0.0034396497 0.0046904315 0.0068792994 0.006566604 0.0034396497 0.0040650405 0.01094434 0.008442776 0.009693558 0.009693558 0.011569731 0.0040650405 0.0043777362 0.0015634772 0.0043777362 0.0053158225 9.380863E-4 0.0043777362 0.005941213 9.380863E-4 0.008442776 0.0021888681 9.380863E-4 0.0012507817 0.0012507817 6.2539085E-4 9.380863E-4 0.0037523452 9.380863E-4 0.0031269544 0.0046904315 9.380863E-4 0.0040650405 0.005003127 0.0 0.0043777362 0.0012507817 0.0012507817 0.0053158225 0.0053158225 0.0037523452 0.006566604 0.006253909 0.006253909 0.011257036 0.011882426 0.005628518 0.005628518 0.01094434 0.006253909 0.006566604 0.0043777362 0.0037523452 0.005941213 0.0053158225 0.011257036 0.0040650405 0.006253909 0.011257036 0.0075046904 0.007191995 0.005941213 0.006253909 0.005628518 0.005003127 0.005628518 0.0053158225 0.005003127 0.015634771 0.015947467 0.015947467 0.009380863 0.007191995 0.007191995 0.005003127 0.0043777362 0.0087554725
[46] 'ST872'    0.07692308 0.078486554 0.07879925 0.078486554 0.005628518 0.010006254 0.010318949 0.010631645 0.009068168 0.0053158225 0.005941213 0.006566604 0.005628518 0.0053158225 0.005941213 0.0040650405 0.011569731 0.009068168 0.010318949 0.010318949 0.012820513 3.1269543E-4 6.2539085E-4 0.0046904315 0.0012507817 0.007191995 0.0040650405 6.2539085E-4 0.0046904315 0.0040650405 0.008442776 0.0021888681 0.0040650405 0.0043777362 0.0043777362 0.0037523452 0.0040650405 6.2539085E-4 0.0040650405 0.005628518 0.0053158225 0.0040650405 9.380863E-4 0.005628518 0.0043777362 0.0 0.0043777362 0.0043777362 0.0034396497 0.0021888681 0.0031269544 0.0053158225 0.005003127 0.005003127 0.012507818 0.012507818 0.0043777362 0.006253909 0.0121951215 0.005003127 0.0053158225 0.0068792994 0.0043777362 0.0046904315 0.0021888681 0.012507818 0.002814259 0.005003127 0.012507818 0.0043777362 0.0040650405 0.0046904315 0.005003127 0.005003127 0.005628518 0.0043777362 0.0046904315 0.0043777362 0.015634771 0.015947467 0.015947467 0.010006254 0.005941213 0.005941213 0.0018761726 0.0012507817 0.0087554725
[47] 'ST930'    0.07692308 0.07786116 0.07817386 0.07723577 0.0068792994 0.009380863 0.009693558 0.010006254 0.008442776 0.0053158225 0.0034396497 0.0046904315 0.0068792994 0.006566604 0.0034396497 0.0040650405 0.01094434 0.008442776 0.009693558 0.009693558 0.011569731 0.0040650405 0.0043777362 0.0015634772 0.0043777362 0.0053158225 9.380863E-4 0.0043777362 0.005941213 9.380863E-4 0.008442776 0.0021888681 9.380863E-4 0.0012507817 0.0012507817 6.2539085E-4 9.380863E-4 0.0037523452 9.380863E-4 0.0031269544 0.0046904315 9.380863E-4 0.0040650405 0.005003127 0.0012507817 0.0043777362 0.0 0.0012507817 0.0053158225 0.0053158225 0.0037523452 0.006566604 0.006253909 0.006253909 0.011257036 0.011882426 0.005628518 0.005628518 0.01094434 0.006253909 0.006566604 0.0043777362 0.0037523452 0.005941213 0.0053158225 0.011257036 0.0040650405 0.006253909 0.011257036 0.0075046904 0.007191995 0.005941213 0.006253909 0.005628518 0.005003127 0.005628518 0.0053158225 0.005003127 0.015634771 0.015947467 0.015947467 0.009380863 0.007191995 0.007191995 0.005003127 0.0043777362 0.0087554725
[48] 'ST998'    0.07692308 0.07786116 0.07817386 0.07723577 0.0068792994 0.009380863 0.009693558 0.010006254 0.008442776 0.0053158225 0.0034396497 0.0046904315 0.0068792994 0.006566604 0.0034396497 0.0040650405 0.01094434 0.008442776 0.009693558 0.009693558 0.011569731 0.0040650405 0.0043777362 0.0015634772 0.0043777362 0.0053158225 3.1269543E-4 0.0043777362 0.005941213 9.380863E-4 0.008442776 0.0021888681 9.380863E-4 0.0012507817 0.0012507817 6.2539085E-4 9.380863E-4 0.0037523452 9.380863E-4 0.0031269544 0.0046904315 9.380863E-4 0.0040650405 0.005003127 0.0012507817 0.0043777362 0.0012507817 0.0 0.0053158225 0.0053158225 0.0037523452 0.006566604 0.006253909 0.006253909 0.011257036 0.011882426 0.005628518 0.005628518 0.01094434 0.006253909 0.006566604 0.0043777362 0.0037523452 0.005941213 0.0053158225 0.011257036 0.0040650405 0.006253909 0.011257036 0.0075046904 0.007191995 0.005941213 0.006253909 0.005628518 0.005003127 0.005628518 0.0053158225 0.005003127 0.015634771 0.015947467 0.015947467 0.009380863 0.007191995 0.007191995 0.005003127 0.0043777362 0.0087554725
[49] 'ST15'     0.07723577 0.07879925 0.07911195 0.07879925 0.005941213 0.009693558 0.010006254 0.010318949 0.0087554725 0.0068792994 0.006253909 0.0075046904 0.005941213 0.005628518 0.006253909 0.005628518 0.011257036 0.0087554725 0.010006254 0.010006254 0.012507818 0.0031269544 0.0034396497 0.005628518 0.0034396497 0.0075046904 0.005003127 0.0034396497 0.005003127 0.005003127 0.0087554725 0.0031269544 0.005003127 0.0053158225 0.0053158225 0.0046904315 0.005003127 0.002814259 0.005003127 0.005941213 0.006253909 0.005003127 0.0031269544 0.006566604 0.0053158225 0.0034396497 0.0053158225 0.0053158225 0.0 0.0037523452 0.005941213 0.005628518 0.0053158225 0.0053158225 0.0121951215 0.0121951215 0.0046904315 0.007191995 0.011882426 0.0053158225 0.005628518 0.007191995 0.005941213 0.005003127 0.0037523452 0.0121951215 0.0043777362 0.0053158225 0.0121951215 0.005941213 0.005628518 0.005003127 0.0053158225 0.007191995 0.007191995 0.006566604 0.0068792994 0.006566604 0.015322076 0.015634771 0.015634771 0.009693558 0.006253909 0.006253909 0.0034396497 0.002814259 0.009068168
[50] 'ST912'    0.07786116 0.07942464 0.079737335 0.07942464 0.006566604 0.01094434 0.011257036 0.011569731 0.010006254 0.006253909 0.0068792994 0.0068792994 0.006566604 0.006253909 0.0068792994 0.005003127 0.012507818 0.010006254 0.011257036 0.011257036 0.013758599 0.0018761726 0.0021888681 0.005628518 0.002814259 0.008130081 0.005003127 0.0021888681 0.005628518 0.005003127 0.0087554725 0.0031269544 0.005003127 0.0053158225 0.0053158225 0.0046904315 0.005003127 0.0021888681 0.005003127 0.006566604 0.006253909 0.005003127 0.0025015634 0.006566604 0.0053158225 0.0021888681 0.0053158225 0.0053158225 0.0037523452 0.0 0.0046904315 0.006253909 0.005941213 0.005941213 0.013445904 0.013445904 0.0053158225 0.007191995 0.013133208 0.005941213 0.006253909 0.007817386 0.0053158225 0.005628518 0.0031269544 0.013445904 0.0037523452 0.005941213 0.013445904 0.0053158225 0.005003127 0.005628518 0.005941213 0.006566604 0.007191995 0.005941213 0.006253909 0.005941213 0.016572857 0.016885553 0.016885553 0.01094434 0.0068792994 0.0068792994 3.1269543E-4 9.380863E-4 0.009068168
[51] 'ST188'    0.07661038 0.07754847 0.07786116 0.07754847 0.006253909 0.0087554725 0.009068168 0.009380863 0.007817386 0.0034396497 0.0034396497 0.0053158225 0.008130081 0.007817386 0.0053158225 0.002814259 0.0121951215 0.009693558 0.009068168 0.009068168 0.011569731 0.002814259 0.0031269544 0.0040650405 0.0037523452 0.005941213 0.0034396497 0.0031269544 0.007191995 0.0034396497 0.009068168 0.0046904315 0.0034396497 0.0037523452 0.0037523452 0.0031269544 0.0034396497 0.0031269544 0.0034396497 0.0043777362 0.006566604 0.0034396497 0.0034396497 0.0068792994 0.0037523452 0.0031269544 0.0037523452 0.0037523452 0.005941213 0.0046904315 0.0 0.005941213 0.005628518 0.005628518 0.011257036 0.011257036 0.005003127 0.005628518 0.01094434 0.005628518 0.005941213 0.0043777362 0.0025015634 0.0053158225 0.002814259 0.011257036 0.0034396497 0.005628518 0.011257036 0.005003127 0.0046904315 0.0053158225 0.005628518 0.0031269544 0.0037523452 0.0031269544 0.002814259 0.0025015634 0.015009381 0.015322076 0.015322076 0.010631645 0.006566604 0.006566604 0.0043777362 0.0037523452 0.009380863
[52] 'ST247'    0.0753596 0.07754847 0.07661038 0.07692308 0.0015634772 0.008442776 0.0087554725 0.009068168 0.006253909 0.006253909 0.0043777362 0.006253909 0.0040650405 0.0037523452 0.0043777362 0.0068792994 0.011882426 0.009380863 0.0087554725 0.0087554725 0.010631645 0.005003127 0.0053158225 0.0068792994 0.0040650405 0.005628518 0.006253909 0.0053158225 0.0025015634 0.006253909 0.0087554725 0.0043777362 0.006253909 0.006566604 0.006566604 0.005941213 0.006253909 0.0046904315 0.006253909 0.0040650405 0.005003127 0.006253909 0.005003127 0.0053158225 0.006566604 0.0053158225 0.006566604 0.006566604 0.005628518 0.006253909 0.005941213 0.0 3.1269543E-4 9.380863E-4 0.010318949 0.01094434 9.380863E-4 0.0040650405 0.010006254 9.380863E-4 0.0012507817 0.0034396497 0.0053158225 6.2539085E-4 0.0043777362 0.010318949 0.0031269544 9.380863E-4 0.010318949 0.0034396497 0.0031269544 6.2539085E-4 9.380863E-4 0.005941213 0.0046904315 0.0053158225 0.005628518 0.0053158225 0.014071294 0.01438399 0.01438399 0.010318949 0.0018761726 0.0018761726 0.005941213 0.0053158225 0.009068168
[53] 'ST250'    0.075046904 0.07723577 0.076297686 0.07661038 0.0012507817 0.008130081 0.008442776 0.0087554725 0.005941213 0.005941213 0.0040650405 0.005941213 0.0037523452 0.0034396497 0.0040650405 0.006566604 0.011569731 0.009068168 0.008442776 0.008442776 0.010318949 0.0046904315 0.005003127 0.006566604 0.0037523452 0.0053158225 0.005941213 0.005003127 0.0021888681 0.005941213 0.008442776 0.0040650405 0.005941213 0.006253909 0.006253909 0.005628518 0.005941213 0.0043777362 0.005941213 0.0037523452 0.0046904315 0.005941213 0.0046904315 0.005003127 0.006253909 0.005003127 0.006253909 0.006253909 0.0053158225 0.005941213 0.005628518 3.1269543E-4 0.0 6.2539085E-4 0.010006254 0.010631645 6.2539085E-4 0.0037523452 0.009693558 6.2539085E-4 9.380863E-4 0.0031269544 0.005003127 3.1269543E-4 0.0040650405 0.010006254 0.002814259 6.2539085E-4 0.010006254 0.0031269544 0.002814259 3.1269543E-4 6.2539085E-4 0.005628518 0.0043777362 0.005003127 0.0053158225 0.005003127 0.013758599 0.014071294 0.014071294 0.010006254 0.0015634772 0.0015634772 0.005628518 0.005003127 0.0087554725
[54] 'ST254'    0.075046904 0.07723577 0.076297686 0.07661038 0.0012507817 0.008130081 0.008442776 0.0087554725 0.005941213 0.005941213 0.0040650405 0.005941213 0.0037523452 0.0034396497 0.0040650405 0.006566604 0.01094434 0.008442776 0.008442776 0.008442776 0.010318949 0.0046904315 0.005003127 0.006566604 0.0037523452 0.0053158225 0.005941213 0.005003127 0.0021888681 0.005941213 0.008442776 0.0040650405 0.005941213 0.006253909 0.006253909 0.005628518 0.005941213 0.0043777362 0.005941213 0.0037523452 0.0046904315 0.005941213 0.0046904315 0.005003127 0.006253909 0.005003127 0.006253909 0.006253909 0.0053158225 0.005941213 0.005628518 9.380863E-4 6.2539085E-4 0.0 0.010006254 0.010006254 6.2539085E-4 0.0037523452 0.009693558 6.2539085E-4 9.380863E-4 0.0031269544 0.005003127 3.1269543E-4 0.0040650405 0.010006254 0.002814259 6.2539085E-4 0.010006254 0.0031269544 0.002814259 9.380863E-4 6.2539085E-4 0.005628518 0.0043777362 0.005003127 0.0053158225 0.005003127 0.013758599 0.014071294 0.014071294 0.010006254 0.0015634772 0.0015634772 0.005628518 0.005003127 0.0087554725
[55] 'ST359'    0.07692308 0.07723577 0.07754847 0.07723577 0.010631645 0.008130081 0.008442776 0.0087554725 0.009693558 0.011569731 0.009693558 0.012820513 0.011882426 0.011569731 0.010318949 0.01094434 0.009068168 0.009068168 0.007191995 0.007191995 0.005941213 0.0121951215 0.012507818 0.011569731 0.011257036 0.01094434 0.01094434 0.012507818 0.01094434 0.01094434 0.012820513 0.01094434 0.01094434 0.011257036 0.011257036 0.010631645 0.01094434 0.011882426 0.01094434 0.010006254 0.0121951215 0.01094434 0.0121951215 0.012507818 0.011257036 0.012507818 0.011257036 0.011257036 0.0121951215 0.013445904 0.011257036 0.010318949 0.010006254 0.010006254 0.0 0.008130081 0.009380863 0.011257036 3.1269543E-4 0.010006254 0.010318949 0.009380863 0.011257036 0.009693558 0.011569731 6.2539085E-4 0.01094434 0.010006254 6.2539085E-4 0.011257036 0.01094434 0.009693558 0.010006254 0.011882426 0.011257036 0.011257036 0.011569731 0.011257036 0.01438399 0.014696686 0.014696686 0.011257036 0.01094434 0.01094434 0.013133208 0.012507818 0.013133208
[56] 'ST398'    0.07692308 0.07723577 0.07817386 0.07723577 0.011257036 0.0068792994 0.007191995 0.0075046904 0.008442776 0.011569731 0.010318949 0.013445904 0.012507818 0.0121951215 0.01094434 0.01094434 0.005941213 0.005941213 0.006566604 0.006566604 0.008130081 0.0121951215 0.012507818 0.011882426 0.011257036 0.011569731 0.011569731 0.012507818 0.011569731 0.011569731 0.0121951215 0.011569731 0.011569731 0.011569731 0.011882426 0.011257036 0.011569731 0.011882426 0.011569731 0.010631645 0.012820513 0.011569731 0.0121951215 0.013133208 0.011882426 0.012507818 0.011882426 0.011882426 0.0121951215 0.013445904 0.011257036 0.01094434 0.010631645 0.010006254 0.008130081 0.0 0.010006254 0.011882426 0.007817386 0.010631645 0.01094434 0.010006254 0.011257036 0.010318949 0.011569731 0.008130081 0.011569731 0.010631645 0.008130081 0.011257036 0.01094434 0.010318949 0.010631645 0.011882426 0.011882426 0.011257036 0.011569731 0.011257036 0.013758599 0.014071294 0.014071294 0.010006254 0.011569731 0.011569731 0.013133208 0.012507818 0.012507818
[57] 'ST576'    0.07442151 0.07661038 0.0756723 0.07598499 0.0012507817 0.0075046904 0.007817386 0.008130081 0.005941213 0.0053158225 0.0034396497 0.005941213 0.0037523452 0.0034396497 0.0040650405 0.005941213 0.01094434 0.008442776 0.007817386 0.007817386 0.009693558 0.0040650405 0.0043777362 0.005941213 0.0031269544 0.0053158225 0.0053158225 0.0043777362 0.0021888681 0.0053158225 0.008442776 0.0034396497 0.0053158225 0.005628518 0.005628518 0.005003127 0.0053158225 0.0037523452 0.0053158225 0.0037523452 0.0046904315 0.0053158225 0.0040650405 0.005003127 0.005628518 0.0043777362 0.005628518 0.005628518 0.0046904315 0.0053158225 0.005003127 9.380863E-4 6.2539085E-4 6.2539085E-4 0.009380863 0.010006254 0.0 0.0037523452 0.009068168 6.2539085E-4 9.380863E-4 0.0031269544 0.0043777362 3.1269543E-4 0.0034396497 0.009380863 0.0021888681 6.2539085E-4 0.009380863 0.0031269544 0.002814259 3.1269543E-4 6.2539085E-4 0.005628518 0.0043777362 0.005003127 0.0053158225 0.005003127 0.013133208 0.013445904 0.013445904 0.009380863 0.0015634772 0.0015634772 0.005003127 0.0043777362 0.0087554725
[58] 'ST583'    0.076297686 0.078486554 0.07754847 0.07786116 0.0043777362 0.009380863 0.009693558 0.010006254 0.009068168 0.0040650405 0.005941213 0.006566604 0.0043777362 0.0040650405 0.005941213 0.007817386 0.012820513 0.010318949 0.009693558 0.009693558 0.011569731 0.005941213 0.006253909 0.005941213 0.005003127 0.0034396497 0.0053158225 0.006253909 0.0046904315 0.0053158225 0.007191995 0.0046904315 0.0053158225 0.005628518 0.005628518 0.005003127 0.0053158225 0.005628518 0.0053158225 0.005628518 9.380863E-4 0.0053158225 0.005941213 0.0012507817 0.005628518 0.006253909 0.005628518 0.005628518 0.007191995 0.007191995 0.005628518 0.0040650405 0.0037523452 0.0037523452 0.011257036 0.011882426 0.0037523452 0.0 0.01094434 0.0037523452 0.0040650405 0.005003127 0.0037523452 0.0034396497 0.0053158225 0.011257036 0.0034396497 0.0037523452 0.011257036 0.005003127 0.0046904315 0.0040650405 0.0037523452 0.006253909 0.005003127 0.006253909 0.005941213 0.005628518 0.015009381 0.015322076 0.015322076 0.009380863 0.0046904315 0.0046904315 0.0068792994 0.006253909 0.0075046904
[59] 'ST59'     0.07661038 0.07692308 0.07723577 0.07692308 0.010318949 0.007817386 0.008130081 0.008442776 0.009380863 0.011257036 0.009380863 0.012507818 0.011569731 0.011257036 0.010006254 0.010631645 0.0087554725 0.0087554725 0.0068792994 0.0068792994 0.005628518 0.011882426 0.0121951215 0.011257036 0.01094434 0.010631645 0.010631645 0.0121951215 0.010631645 0.010631645 0.012507818 0.010631645 0.010631645 0.01094434 0.01094434 0.010318949 0.010631645 0.011569731 0.010631645 0.009693558 0.011882426 0.010631645 0.011882426 0.0121951215 0.01094434 0.0121951215 0.01094434 0.01094434 0.011882426 0.013133208 0.01094434 0.010006254 0.009693558 0.009693558 3.1269543E-4 0.007817386 0.009068168 0.01094434 0.0 0.009693558 0.010006254 0.009068168 0.01094434 0.009380863 0.011257036 3.1269543E-4 0.010631645 0.009693558 3.1269543E-4 0.01094434 0.010631645 0.009380863 0.009693558 0.011569731 0.01094434 0.01094434 0.011257036 0.01094434 0.014071294 0.01438399 0.01438399 0.01094434 0.010631645 0.010631645 0.012820513 0.0121951215 0.012820513
[60] 'ST609'    0.075046904 0.07723577 0.076297686 0.07661038 0.0012507817 0.008130081 0.008442776 0.0087554725 0.005941213 0.005941213 0.0040650405 0.005941213 0.0037523452 0.0034396497 0.0040650405 0.006566604 0.011569731 0.009068168 0.008442776 0.008442776 0.010318949 0.0046904315 0.005003127 0.006566604 0.0037523452 0.0053158225 0.005941213 0.005003127 0.0021888681 0.005941213 0.008442776 0.0040650405 0.005941213 0.006253909 0.006253909 0.005628518 0.005941213 0.0043777362 0.005941213 0.0037523452 0.0046904315 0.005941213 0.0046904315 0.005003127 0.006253909 0.005003127 0.006253909 0.006253909 0.0053158225 0.005941213 0.005628518 9.380863E-4 6.2539085E-4 6.2539085E-4 0.010006254 0.010631645 6.2539085E-4 0.0037523452 0.009693558 0.0 9.380863E-4 0.0031269544 0.005003127 3.1269543E-4 0.0040650405 0.010006254 0.002814259 6.2539085E-4 0.010006254 0.0031269544 0.002814259 9.380863E-4 6.2539085E-4 0.005628518 0.0043777362 0.005003127 0.0053158225 0.005003127 0.013758599 0.014071294 0.014071294 0.010006254 0.0015634772 0.0015634772 0.005628518 0.005003127 0.0087554725
[61] 'ST612'    0.075046904 0.07723577 0.076297686 0.07661038 0.0015634772 0.008442776 0.0087554725 0.009068168 0.006253909 0.006253909 0.0043777362 0.006253909 0.0040650405 0.0037523452 0.0043777362 0.0068792994 0.011882426 0.009380863 0.0087554725 0.0087554725 0.010631645 0.005003127 0.0053158225 0.0068792994 0.0040650405 0.005628518 0.006253909 0.0053158225 0.0025015634 0.006253909 0.0087554725 0.0043777362 0.006253909 0.006566604 0.006566604 0.005941213 0.006253909 0.0046904315 0.006253909 0.0040650405 0.005003127 0.006253909 0.005003127 0.0053158225 0.006566604 0.0053158225 0.006566604 0.006566604 0.005628518 0.006253909 0.005941213 0.0012507817 9.380863E-4 9.380863E-4 0.010318949 0.01094434 9.380863E-4 0.0040650405 0.010006254 9.380863E-4 0.0 0.0034396497 0.0053158225 6.2539085E-4 0.0043777362 0.010318949 0.0031269544 9.380863E-4 0.010318949 0.0034396497 0.0031269544 0.0012507817 3.1269543E-4 0.005941213 0.0046904315 0.0053158225 0.005628518 0.0053158225 0.014071294 0.01438399 0.01438399 0.010318949 0.0018761726 0.0018761726 0.005941213 0.0053158225 0.009068168
[62] 'ST7'      0.0756723 0.07661038 0.07692308 0.07598499 0.0037523452 0.0075046904 0.007817386 0.008130081 0.0053158225 0.0053158225 0.0021888681 0.0046904315 0.006253909 0.005941213 0.0015634772 0.0053158225 0.01094434 0.008442776 0.007817386 0.007817386 0.009693558 0.006566604 0.0068792994 0.0046904315 0.005628518 0.0046904315 0.0040650405 0.0068792994 0.0046904315 0.0040650405 0.008442776 0.0053158225 0.0040650405 0.0043777362 0.0043777362 0.0037523452 0.0040650405 0.006253909 0.0040650405 0.0018761726 0.005941213 0.0040650405 0.006566604 0.006253909 0.0043777362 0.0068792994 0.0043777362 0.0043777362 0.007191995 0.007817386 0.0043777362 0.0034396497 0.0031269544 0.0031269544 0.009380863 0.010006254 0.0031269544 0.005003127 0.009068168 0.0031269544 0.0034396497 0.0 0.0043777362 0.002814259 0.005941213 0.009380863 0.0053158225 0.0031269544 0.009380863 0.005003127 0.0046904315 0.0034396497 0.0031269544 0.005003127 0.0043777362 0.005003127 0.0046904315 0.0043777362 0.013758599 0.014071294 0.014071294 0.009380863 0.0040650405 0.0040650405 0.0075046904 0.0068792994 0.0087554725
[63] 'ST779'    0.076297686 0.07723577 0.07754847 0.07723577 0.005628518 0.0087554725 0.009068168 0.009380863 0.007817386 0.0021888681 0.0040650405 0.006566604 0.0068792994 0.006566604 0.0053158225 0.0046904315 0.0121951215 0.009693558 0.009068168 0.009068168 0.011569731 0.0040650405 0.0043777362 0.0040650405 0.0037523452 0.005941213 0.0034396497 0.0043777362 0.006566604 0.0034396497 0.008442776 0.0040650405 0.0034396497 0.0037523452 0.0037523452 0.0031269544 0.0034396497 0.0037523452 0.0034396497 0.005003127 0.0046904315 0.0034396497 0.0040650405 0.005003127 0.0037523452 0.0043777362 0.0037523452 0.0037523452 0.005941213 0.0053158225 0.0025015634 0.0053158225 0.005003127 0.005003127 0.011257036 0.011257036 0.0043777362 0.0037523452 0.01094434 0.005003127 0.0053158225 0.0043777362 0.0 0.0046904315 0.0034396497 0.011257036 0.0034396497 0.005003127 0.011257036 0.005628518 0.0053158225 0.0046904315 0.005003127 0.0043777362 0.005003127 0.0043777362 0.0040650405 0.0037523452 0.01438399 0.014696686 0.014696686 0.010006254 0.005941213 0.005941213 0.005003127 0.0043777362 0.0087554725
[64] 'ST8'      0.07473421 0.07692308 0.07598499 0.076297686 9.380863E-4 0.007817386 0.008130081 0.008442776 0.005628518 0.005628518 0.0037523452 0.005628518 0.0034396497 0.0031269544 0.0037523452 0.006253909 0.011257036 0.0087554725 0.008130081 0.008130081 0.010006254 0.0043777362 0.0046904315 0.006253909 0.0034396497 0.005003127 0.005628518 0.0046904315 0.0018761726 0.005628518 0.008130081 0.0037523452 0.005628518 0.005941213 0.005941213 0.0053158225 0.005628518 0.0040650405 0.005628518 0.0034396497 0.0043777362 0.005628518 0.0043777362 0.0046904315 0.005941213 0.0046904315 0.005941213 0.005941213 0.005003127 0.005628518 0.0053158225 6.2539085E-4 3.1269543E-4 3.1269543E-4 0.009693558 0.010318949 3.1269543E-4 0.0034396497 0.009380863 3.1269543E-4 6.2539085E-4 0.002814259 0.0046904315 0.0 0.0037523452 0.009693558 0.0025015634 3.1269543E-4 0.009693558 0.002814259 0.0025015634 6.2539085E-4 3.1269543E-4 0.0053158225 0.0040650405 0.0046904315 0.005003127 0.0046904315 0.013445904 0.013758599 0.013758599 0.009693558 0.0012507817 0.0012507817 0.0053158225 0.0046904315 0.008442776
[65] 'ST834'    0.076297686 0.07786116 0.07817386 0.07786116 0.0046904315 0.009068168 0.009380863 0.009693558 0.008130081 0.0043777362 0.005003127 0.0075046904 0.006566604 0.006253909 0.0068792994 0.005003127 0.012507818 0.010006254 0.009380863 0.009380863 0.011882426 0.0018761726 0.0021888681 0.005628518 0.002814259 0.008130081 0.005003127 0.0021888681 0.005628518 0.005003127 0.009380863 0.0031269544 0.005003127 0.0053158225 0.0053158225 0.0046904315 0.005003127 0.0021888681 0.005003127 0.006566604 0.006253909 0.005003127 0.0025015634 0.006566604 0.0053158225 0.0021888681 0.0053158225 0.0053158225 0.0037523452 0.0031269544 0.002814259 0.0043777362 0.0040650405 0.0040650405 0.011569731 0.011569731 0.0034396497 0.0053158225 0.011257036 0.0040650405 0.0043777362 0.005941213 0.0034396497 0.0037523452 0.0 0.011569731 0.0018761726 0.0040650405 0.011569731 0.0034396497 0.0031269544 0.0037523452 0.0040650405 0.0046904315 0.0053158225 0.0040650405 0.0043777362 0.0040650405 0.014696686 0.015009381 0.015009381 0.01094434 0.005003127 0.005003127 0.002814259 0.0021888681 0.009693558
[66] 'ST87'     0.07692308 0.07723577 0.07754847 0.07723577 0.010631645 0.008130081 0.008442776 0.0087554725 0.009693558 0.011569731 0.009693558 0.012820513 0.011882426 0.011569731 0.010318949 0.01094434 0.009068168 0.009068168 0.007191995 0.007191995 0.005941213 0.0121951215 0.012507818 0.011569731 0.011257036 0.01094434 0.01094434 0.012507818 0.01094434 0.01094434 0.012820513 0.01094434 0.01094434 0.011257036 0.011257036 0.010631645 0.01094434 0.011882426 0.01094434 0.010006254 0.0121951215 0.01094434 0.0121951215 0.012507818 0.011257036 0.012507818 0.011257036 0.011257036 0.0121951215 0.013445904 0.011257036 0.010318949 0.010006254 0.010006254 6.2539085E-4 0.008130081 0.009380863 0.011257036 3.1269543E-4 0.010006254 0.010318949 0.009380863 0.011257036 0.009693558 0.011569731 0.0 0.01094434 0.010006254 6.2539085E-4 0.011257036 0.01094434 0.009693558 0.010006254 0.011882426 0.011257036 0.011257036 0.011569731 0.011257036 0.01438399 0.014696686 0.014696686 0.011257036 0.01094434 0.01094434 0.013133208 0.012507818 0.013133208
[67] 'ST9'      0.0756723 0.07786116 0.07692308 0.07723577 0.0034396497 0.009068168 0.009380863 0.009693558 0.008130081 0.005003127 0.0043777362 0.006253909 0.0053158225 0.005003127 0.006253909 0.005628518 0.012507818 0.010006254 0.009380863 0.009380863 0.011257036 0.0025015634 0.002814259 0.0043777362 0.0034396497 0.0068792994 0.0037523452 0.002814259 0.0043777362 0.0037523452 0.009380863 0.0018761726 0.0037523452 0.0040650405 0.0040650405 0.0034396497 0.0037523452 0.002814259 0.0037523452 0.005941213 0.0043777362 0.0037523452 0.0031269544 0.0046904315 0.0040650405 0.002814259 0.0040650405 0.0040650405 0.0043777362 0.0037523452 0.0034396497 0.0031269544 0.002814259 0.002814259 0.01094434 0.011569731 0.0021888681 0.0034396497 0.010631645 0.002814259 0.0031269544 0.0053158225 0.0034396497 0.0025015634 0.0018761726 0.01094434 0.0 0.002814259 0.01094434 0.0040650405 0.0037523452 0.0025015634 0.002814259 0.0053158225 0.0040650405 0.0046904315 0.005003127 0.0046904315 0.014696686 0.015009381 0.015009381 0.01094434 0.0037523452 0.0037523452 0.0034396497 0.002814259 0.009693558
[68] 'ST94'     0.075046904 0.07723577 0.076297686 0.07661038 0.0012507817 0.008130081 0.008442776 0.0087554725 0.005941213 0.005941213 0.0040650405 0.005941213 0.0037523452 0.0034396497 0.0040650405 0.006566604 0.011569731 0.009068168 0.008442776 0.008442776 0.010318949 0.0046904315 0.005003127 0.006566604 0.0037523452 0.0053158225 0.005941213 0.005003127 0.0021888681 0.005941213 0.008442776 0.0040650405 0.005941213 0.006253909 0.006253909 0.005628518 0.005941213 0.0043777362 0.005941213 0.0037523452 0.0046904315 0.005941213 0.0046904315 0.005003127 0.006253909 0.005003127 0.006253909 0.006253909 0.0053158225 0.005941213 0.005628518 9.380863E-4 6.2539085E-4 6.2539085E-4 0.010006254 0.010631645 6.2539085E-4 0.0037523452 0.009693558 6.2539085E-4 9.380863E-4 0.0031269544 0.005003127 3.1269543E-4 0.0040650405 0.010006254 0.002814259 0.0 0.010006254 0.0031269544 0.002814259 9.380863E-4 6.2539085E-4 0.005628518 0.0043777362 0.005003127 0.0053158225 0.005003127 0.013758599 0.014071294 0.014071294 0.010006254 0.0015634772 0.0015634772 0.005628518 0.005003127 0.0087554725
[69] 'ST952'    0.07692308 0.07723577 0.07754847 0.07723577 0.010631645 0.008130081 0.008442776 0.0087554725 0.009693558 0.011569731 0.009693558 0.012820513 0.011882426 0.011569731 0.010318949 0.01094434 0.009068168 0.009068168 0.007191995 0.007191995 0.005941213 0.0121951215 0.012507818 0.011569731 0.011257036 0.01094434 0.01094434 0.012507818 0.01094434 0.01094434 0.012820513 0.01094434 0.01094434 0.011257036 0.011257036 0.010631645 0.01094434 0.011882426 0.01094434 0.010006254 0.0121951215 0.01094434 0.0121951215 0.012507818 0.011257036 0.012507818 0.011257036 0.011257036 0.0121951215 0.013445904 0.011257036 0.010318949 0.010006254 0.010006254 6.2539085E-4 0.008130081 0.009380863 0.011257036 3.1269543E-4 0.010006254 0.010318949 0.009380863 0.011257036 0.009693558 0.011569731 6.2539085E-4 0.01094434 0.010006254 0.0 0.011257036 0.01094434 0.009693558 0.010006254 0.011882426 0.011257036 0.011257036 0.011569731 0.011257036 0.01438399 0.014696686 0.014696686 0.011257036 0.01094434 0.01094434 0.013133208 0.012507818 0.013133208
[70] 'ST953'    0.07598499 0.07754847 0.07786116 0.07754847 0.0037523452 0.0087554725 0.009068168 0.009380863 0.007191995 0.006566604 0.0053158225 0.005941213 0.006253909 0.005941213 0.005941213 0.005941213 0.0121951215 0.009693558 0.009068168 0.009068168 0.011569731 0.0040650405 0.0043777362 0.007817386 0.0043777362 0.005941213 0.007191995 0.0043777362 0.0046904315 0.007191995 0.007191995 0.0053158225 0.007191995 0.0075046904 0.0075046904 0.0068792994 0.007191995 0.0043777362 0.007191995 0.005628518 0.005941213 0.007191995 0.0046904315 0.006253909 0.0075046904 0.0043777362 0.0075046904 0.0075046904 0.005941213 0.0053158225 0.005003127 0.0034396497 0.0031269544 0.0031269544 0.011257036 0.011257036 0.0031269544 0.005003127 0.01094434 0.0031269544 0.0034396497 0.005003127 0.005628518 0.002814259 0.0034396497 0.011257036 0.0040650405 0.0031269544 0.011257036 0.0 3.1269543E-4 0.0034396497 0.0031269544 0.005628518 0.006253909 0.005003127 0.0053158225 0.005003127 0.01438399 0.014696686 0.014696686 0.009380863 0.0040650405 0.0040650405 0.005003127 0.0043777362 0.0075046904
[71] 'ST97'     0.0756723 0.07723577 0.07754847 0.07723577 0.0034396497 0.008442776 0.0087554725 0.009068168 0.0068792994 0.006253909 0.005003127 0.005628518 0.005941213 0.005628518 0.005628518 0.005628518 0.011882426 0.009380863 0.0087554725 0.0087554725 0.011257036 0.0037523452 0.0040650405 0.0075046904 0.0040650405 0.005628518 0.0068792994 0.0040650405 0.0043777362 0.0068792994 0.0068792994 0.005003127 0.0068792994 0.007191995 0.007191995 0.006566604 0.0068792994 0.0040650405 0.0068792994 0.0053158225 0.005628518 0.0068792994 0.0043777362 0.005941213 0.007191995 0.0040650405 0.007191995 0.007191995 0.005628518 0.005003127 0.0046904315 0.0031269544 0.002814259 0.002814259 0.01094434 0.01094434 0.002814259 0.0046904315 0.010631645 0.002814259 0.0031269544 0.0046904315 0.0053158225 0.0025015634 0.0031269544 0.01094434 0.0037523452 0.002814259 0.01094434 3.1269543E-4 0.0 0.0031269544 0.002814259 0.0053158225 0.005941213 0.0046904315 0.005003127 0.0046904315 0.014071294 0.01438399 0.01438399 0.009068168 0.0037523452 0.0037523452 0.0046904315 0.0040650405 0.007191995
[72] 'ST985'    0.07473421 0.07692308 0.07598499 0.076297686 0.0015634772 0.007817386 0.008130081 0.008442776 0.006253909 0.005628518 0.0037523452 0.006253909 0.0040650405 0.0037523452 0.0043777362 0.006253909 0.011257036 0.0087554725 0.008130081 0.008130081 0.010006254 0.0043777362 0.0046904315 0.006253909 0.0034396497 0.005628518 0.005628518 0.0046904315 0.0025015634 0.005628518 0.0087554725 0.0037523452 0.005628518 0.005941213 0.005941213 0.0053158225 0.005628518 0.0040650405 0.005628518 0.0040650405 0.005003127 0.005628518 0.0043777362 0.0053158225 0.005941213 0.0046904315 0.005941213 0.005941213 0.005003127 0.005628518 0.0053158225 6.2539085E-4 3.1269543E-4 9.380863E-4 0.009693558 0.010318949 3.1269543E-4 0.0040650405 0.009380863 9.380863E-4 0.0012507817 0.0034396497 0.0046904315 6.2539085E-4 0.0037523452 0.009693558 0.0025015634 9.380863E-4 0.009693558 0.0034396497 0.0031269544 0.0 9.380863E-4 0.005941213 0.0046904315 0.0053158225 0.005628518 0.0053158225 0.013445904 0.013758599 0.013758599 0.009693558 0.0018761726 0.0018761726 0.0053158225 0.0046904315 0.009068168
[73] 'ST995'    0.075046904 0.07723577 0.076297686 0.07661038 0.0012507817 0.008130081 0.008442776 0.0087554725 0.005941213 0.005941213 0.0040650405 0.005941213 0.0037523452 0.0034396497 0.0040650405 0.006566604 0.011569731 0.009068168 0.008442776 0.008442776 0.010318949 0.0046904315 0.005003127 0.006566604 0.0037523452 0.0053158225 0.005941213 0.005003127 0.0021888681 0.005941213 0.008442776 0.0040650405 0.005941213 0.006253909 0.006253909 0.005628518 0.005941213 0.0043777362 0.005941213 0.0037523452 0.0046904315 0.005941213 0.0046904315 0.005003127 0.006253909 0.005003127 0.006253909 0.006253909 0.0053158225 0.005941213 0.005628518 9.380863E-4 6.2539085E-4 6.2539085E-4 0.010006254 0.010631645 6.2539085E-4 0.0037523452 0.009693558 6.2539085E-4 3.1269543E-4 0.0031269544 0.005003127 3.1269543E-4 0.0040650405 0.010006254 0.002814259 6.2539085E-4 0.010006254 0.0031269544 0.002814259 9.380863E-4 0.0 0.005628518 0.0043777362 0.005003127 0.0053158225 0.005003127 0.013758599 0.014071294 0.014071294 0.010006254 0.0015634772 0.0015634772 0.005628518 0.005003127 0.0087554725
[74] 'ST129'    0.07754847 0.078486554 0.07879925 0.078486554 0.006253909 0.009380863 0.009693558 0.010006254 0.007817386 0.0053158225 0.0053158225 0.007191995 0.008130081 0.007817386 0.005941213 0.005941213 0.012820513 0.010318949 0.009693558 0.009693558 0.0121951215 0.0046904315 0.005003127 0.005941213 0.0043777362 0.007191995 0.0053158225 0.005003127 0.007191995 0.0053158225 0.009068168 0.005941213 0.0053158225 0.005628518 0.005628518 0.005003127 0.0053158225 0.0043777362 0.0053158225 0.005628518 0.007191995 0.0053158225 0.0046904315 0.0075046904 0.005628518 0.005003127 0.005628518 0.005628518 0.007191995 0.006566604 0.0031269544 0.005941213 0.005628518 0.005628518 0.011882426 0.011882426 0.005628518 0.006253909 0.011569731 0.005628518 0.005941213 0.005003127 0.0043777362 0.0053158225 0.0046904315 0.011882426 0.0053158225 0.005628518 0.011882426 0.005628518 0.0053158225 0.005941213 0.005628518 0.0 0.0012507817 6.2539085E-4 3.1269543E-4 6.2539085E-4 0.015634771 0.015947467 0.015947467 0.011257036 0.006566604 0.006566604 0.006253909 0.005628518 0.009380863
[75] 'ST255'    0.07692308 0.078486554 0.07754847 0.07786116 0.005003127 0.009380863 0.009693558 0.010006254 0.007817386 0.005941213 0.0046904315 0.006566604 0.0068792994 0.006566604 0.0053158225 0.006566604 0.012820513 0.010318949 0.009693558 0.009693558 0.011569731 0.0053158225 0.005628518 0.0053158225 0.005003127 0.005941213 0.0046904315 0.005628518 0.005941213 0.0046904315 0.009068168 0.0053158225 0.0046904315 0.005003127 0.005003127 0.0043777362 0.0046904315 0.005003127 0.0046904315 0.005003127 0.005941213 0.0046904315 0.0053158225 0.006253909 0.005003127 0.005628518 0.005003127 0.005003127 0.007191995 0.007191995 0.0037523452 0.0046904315 0.0043777362 0.0043777362 0.011257036 0.011882426 0.0043777362 0.005003127 0.01094434 0.0043777362 0.0046904315 0.0043777362 0.005003127 0.0040650405 0.0053158225 0.011257036 0.0040650405 0.0043777362 0.011257036 0.006253909 0.005941213 0.0046904315 0.0043777362 0.0012507817 0.0 0.0012507817 9.380863E-4 0.0012507817 0.015634771 0.015947467 0.015947467 0.011257036 0.0053158225 0.0053158225 0.0068792994 0.006253909 0.009380863
[76] 'ST257'    0.07692308 0.07786116 0.07817386 0.07786116 0.005628518 0.0087554725 0.009068168 0.009380863 0.007191995 0.0053158225 0.0053158225 0.007191995 0.0075046904 0.007191995 0.005941213 0.005941213 0.0121951215 0.009693558 0.009068168 0.009068168 0.011569731 0.0040650405 0.0043777362 0.005941213 0.0037523452 0.007191995 0.0053158225 0.0043777362 0.006566604 0.0053158225 0.009068168 0.0053158225 0.0053158225 0.005628518 0.005628518 0.005003127 0.0053158225 0.0037523452 0.0053158225 0.005628518 0.007191995 0.0053158225 0.0040650405 0.0075046904 0.005628518 0.0043777362 0.005628518 0.005628518 0.006566604 0.005941213 0.0031269544 0.0053158225 0.005003127 0.005003127 0.011257036 0.011257036 0.005003127 0.006253909 0.01094434 0.005003127 0.0053158225 0.005003127 0.0043777362 0.0046904315 0.0040650405 0.011257036 0.0046904315 0.005003127 0.011257036 0.005003127 0.0046904315 0.0053158225 0.005003127 6.2539085E-4 0.0012507817 0.0 3.1269543E-4 6.2539085E-4 0.015009381 0.015322076 0.015322076 0.010631645 0.005941213 0.005941213 0.005628518 0.005003127 0.009380863
[77] 'ST78'     0.07723577 0.07817386 0.078486554 0.07817386 0.005941213 0.009068168 0.009380863 0.009693558 0.0075046904 0.005003127 0.005003127 0.0068792994 0.007817386 0.0075046904 0.005628518 0.005628518 0.012507818 0.010006254 0.009380863 0.009380863 0.011882426 0.0043777362 0.0046904315 0.005628518 0.0040650405 0.0068792994 0.005003127 0.0046904315 0.0068792994 0.005003127 0.0087554725 0.005628518 0.005003127 0.0053158225 0.0053158225 0.0046904315 0.005003127 0.0040650405 0.005003127 0.0053158225 0.0068792994 0.005003127 0.0043777362 0.007191995 0.0053158225 0.0046904315 0.0053158225 0.0053158225 0.0068792994 0.006253909 0.002814259 0.005628518 0.0053158225 0.0053158225 0.011569731 0.011569731 0.0053158225 0.005941213 0.011257036 0.0053158225 0.005628518 0.0046904315 0.0040650405 0.005003127 0.0043777362 0.011569731 0.005003127 0.0053158225 0.011569731 0.0053158225 0.005003127 0.005628518 0.0053158225 3.1269543E-4 9.380863E-4 3.1269543E-4 0.0 3.1269543E-4 0.015322076 0.015634771 0.015634771 0.01094434 0.006253909 0.006253909 0.005941213 0.0053158225 0.009068168
[78] 'ST88'     0.07692308 0.07786116 0.07817386 0.07786116 0.005628518 0.0087554725 0.009068168 0.009380863 0.007191995 0.0046904315 0.0046904315 0.006566604 0.0075046904 0.007191995 0.0053158225 0.0053158225 0.0121951215 0.009693558 0.009068168 0.009068168 0.011569731 0.0040650405 0.0043777362 0.0053158225 0.0037523452 0.006566604 0.0046904315 0.0043777362 0.006566604 0.0046904315 0.008442776 0.0053158225 0.0046904315 0.005003127 0.005003127 0.0043777362 0.0046904315 0.0037523452 0.0046904315 0.005003127 0.006566604 0.0046904315 0.0040650405 0.0068792994 0.005003127 0.0043777362 0.005003127 0.005003127 0.006566604 0.005941213 0.0025015634 0.0053158225 0.005003127 0.005003127 0.011257036 0.011257036 0.005003127 0.005628518 0.01094434 0.005003127 0.0053158225 0.0043777362 0.0037523452 0.0046904315 0.0040650405 0.011257036 0.0046904315 0.005003127 0.011257036 0.005003127 0.0046904315 0.0053158225 0.005003127 6.2539085E-4 0.0012507817 6.2539085E-4 3.1269543E-4 0.0 0.015009381 0.015322076 0.015322076 0.010631645 0.005941213 0.005941213 0.005628518 0.005003127 0.0087554725
[79] 'ST152'    0.07879925 0.07911195 0.08005003 0.07911195 0.013758599 0.013758599 0.014071294 0.01438399 0.014071294 0.014696686 0.014071294 0.01719825 0.015634771 0.015322076 0.014071294 0.015322076 0.014696686 0.014071294 0.013445904 0.013445904 0.01438399 0.015322076 0.015634771 0.015634771 0.01438399 0.015322076 0.015322076 0.015634771 0.014696686 0.015322076 0.01719825 0.014696686 0.015322076 0.015322076 0.015634771 0.015009381 0.015322076 0.015009381 0.015322076 0.01438399 0.015947467 0.015322076 0.015322076 0.016260162 0.015634771 0.015634771 0.015634771 0.015634771 0.015322076 0.016572857 0.015009381 0.014071294 0.013758599 0.013758599 0.01438399 0.013758599 0.013133208 0.015009381 0.014071294 0.013758599 0.014071294 0.013758599 0.01438399 0.013445904 0.014696686 0.01438399 0.014696686 0.013758599 0.01438399 0.01438399 0.014071294 0.013445904 0.013758599 0.015634771 0.015634771 0.015009381 0.015322076 0.015009381 0.0 3.1269543E-4 3.1269543E-4 0.016260162 0.014071294 0.014071294 0.016260162 0.015634771 0.017510945
[80] 'ST1633'   0.07911195 0.07942464 0.08036273 0.07942464 0.014071294 0.014071294 0.01438399 0.014696686 0.01438399 0.015009381 0.01438399 0.017510945 0.015947467 0.015634771 0.01438399 0.015634771 0.015009381 0.01438399 0.013758599 0.013758599 0.014696686 0.015634771 0.015947467 0.015947467 0.014696686 0.015634771 0.015634771 0.015947467 0.015009381 0.015634771 0.017510945 0.015009381 0.015634771 0.015634771 0.015947467 0.015322076 0.015634771 0.015322076 0.015634771 0.014696686 0.016260162 0.015634771 0.015634771 0.016572857 0.015947467 0.015947467 0.015947467 0.015947467 0.015634771 0.016885553 0.015322076 0.01438399 0.014071294 0.014071294 0.014696686 0.014071294 0.013445904 0.015322076 0.01438399 0.014071294 0.01438399 0.014071294 0.014696686 0.013758599 0.015009381 0.014696686 0.015009381 0.014071294 0.014696686 0.014696686 0.01438399 0.013758599 0.014071294 0.015947467 0.015947467 0.015322076 0.015634771 0.015322076 3.1269543E-4 0.0 6.2539085E-4 0.016572857 0.01438399 0.01438399 0.016572857 0.015947467 0.01782364
[81] 'ST377'    0.07911195 0.07942464 0.08036273 0.07942464 0.014071294 0.014071294 0.01438399 0.014696686 0.01438399 0.015009381 0.01438399 0.017510945 0.015947467 0.015634771 0.01438399 0.015634771 0.015009381 0.01438399 0.013758599 0.013758599 0.014696686 0.015634771 0.015947467 0.015947467 0.014696686 0.015634771 0.015634771 0.015947467 0.015009381 0.015634771 0.017510945 0.015009381 0.015634771 0.015634771 0.015947467 0.015322076 0.015634771 0.015322076 0.015634771 0.014696686 0.016260162 0.015634771 0.015634771 0.016572857 0.015947467 0.015947467 0.015947467 0.015947467 0.015634771 0.016885553 0.015322076 0.01438399 0.014071294 0.014071294 0.014696686 0.014071294 0.013445904 0.015322076 0.01438399 0.014071294 0.01438399 0.014071294 0.014696686 0.013758599 0.015009381 0.014696686 0.015009381 0.014071294 0.014696686 0.014696686 0.01438399 0.013758599 0.014071294 0.015947467 0.015947467 0.015322076 0.015634771 0.015322076 3.1269543E-4 6.2539085E-4 0.0 0.016572857 0.01438399 0.01438399 0.016572857 0.015947467 0.01782364
[82] 'ST207'    0.07786116 0.07817386 0.07911195 0.07817386 0.010631645 0.008130081 0.008442776 0.0087554725 0.009068168 0.009693558 0.009693558 0.010318949 0.0087554725 0.008442776 0.008442776 0.009068168 0.008442776 0.006566604 0.007817386 0.007817386 0.011257036 0.009693558 0.010006254 0.009693558 0.0087554725 0.006566604 0.009068168 0.010006254 0.009068168 0.009068168 0.007191995 0.009068168 0.009068168 0.009380863 0.009380863 0.0087554725 0.009068168 0.009380863 0.009068168 0.008130081 0.008442776 0.009068168 0.009693558 0.0087554725 0.009380863 0.010006254 0.009380863 0.009380863 0.009693558 0.01094434 0.010631645 0.010318949 0.010006254 0.010006254 0.011257036 0.010006254 0.009380863 0.009380863 0.01094434 0.010006254 0.010318949 0.009380863 0.010006254 0.009693558 0.01094434 0.011257036 0.01094434 0.010006254 0.011257036 0.009380863 0.009068168 0.009693558 0.010006254 0.011257036 0.011257036 0.010631645 0.01094434 0.010631645 0.016260162 0.016572857 0.016572857 0.0 0.01094434 0.01094434 0.010631645 0.010006254 0.0075046904
[83] 'ST240'    0.07598499 0.07817386 0.07723577 0.07692308 3.1269543E-4 0.007191995 0.0075046904 0.007817386 0.005003127 0.0068792994 0.005003127 0.0068792994 0.0046904315 0.0043777362 0.0043777362 0.0068792994 0.011882426 0.009380863 0.009380863 0.009380863 0.011257036 0.005628518 0.005941213 0.0075046904 0.0046904315 0.006253909 0.0068792994 0.005941213 0.0031269544 0.0068792994 0.009380863 0.005003127 0.0068792994 0.007191995 0.007191995 0.006566604 0.0068792994 0.0053158225 0.0068792994 0.0046904315 0.005628518 0.0068792994 0.005628518 0.005941213 0.007191995 0.005941213 0.007191995 0.007191995 0.006253909 0.0068792994 0.006566604 0.0018761726 0.0015634772 0.0015634772 0.01094434 0.011569731 0.0015634772 0.0046904315 0.010631645 0.0015634772 0.0018761726 0.0040650405 0.005941213 0.0012507817 0.005003127 0.01094434 0.0037523452 0.0015634772 0.01094434 0.0040650405 0.0037523452 0.0018761726 0.0015634772 0.006566604 0.0053158225 0.005941213 0.006253909 0.005941213 0.014071294 0.01438399 0.01438399 0.01094434 0.0 6.2539085E-4 0.006566604 0.005941213 0.009693558
[84] 'ST241'    0.0753596 0.07754847 0.07661038 0.07692308 3.1269543E-4 0.007191995 0.0075046904 0.007817386 0.005003127 0.0068792994 0.005003127 0.0068792994 0.0046904315 0.0043777362 0.0043777362 0.0068792994 0.011882426 0.009380863 0.009380863 0.009380863 0.011257036 0.005628518 0.005941213 0.0075046904 0.0046904315 0.006253909 0.0068792994 0.005941213 0.0031269544 0.0068792994 0.009380863 0.005003127 0.0068792994 0.007191995 0.007191995 0.006566604 0.0068792994 0.0053158225 0.0068792994 0.0046904315 0.005628518 0.0068792994 0.005628518 0.005941213 0.007191995 0.005941213 0.007191995 0.007191995 0.006253909 0.0068792994 0.006566604 0.0018761726 0.0015634772 0.0015634772 0.01094434 0.011569731 0.0015634772 0.0046904315 0.010631645 0.0015634772 0.0018761726 0.0040650405 0.005941213 0.0012507817 0.005003127 0.01094434 0.0037523452 0.0015634772 0.01094434 0.0040650405 0.0037523452 0.0018761726 0.0015634772 0.006566604 0.0053158225 0.005941213 0.006253909 0.005941213 0.014071294 0.01438399 0.01438399 0.01094434 6.2539085E-4 0.0 0.006566604 0.005941213 0.009693558
[85] 'ST913'    0.07754847 0.07911195 0.07942464 0.07911195 0.006253909 0.010631645 0.01094434 0.011257036 0.009693558 0.005941213 0.006566604 0.006566604 0.006253909 0.005941213 0.006566604 0.0046904315 0.0121951215 0.009693558 0.01094434 0.01094434 0.013445904 0.0015634772 0.0018761726 0.0053158225 0.0025015634 0.007817386 0.0046904315 0.0018761726 0.0053158225 0.0046904315 0.008442776 0.002814259 0.0046904315 0.005003127 0.005003127 0.0043777362 0.0046904315 0.0018761726 0.0046904315 0.006253909 0.005941213 0.0046904315 0.0021888681 0.006253909 0.005003127 0.0018761726 0.005003127 0.005003127 0.0034396497 3.1269543E-4 0.0043777362 0.005941213 0.005628518 0.005628518 0.013133208 0.013133208 0.005003127 0.0068792994 0.012820513 0.005628518 0.005941213 0.0075046904 0.005003127 0.0053158225 0.002814259 0.013133208 0.0034396497 0.005628518 0.013133208 0.005003127 0.0046904315 0.0053158225 0.005628518 0.006253909 0.0068792994 0.005628518 0.005941213 0.005628518 0.016260162 0.016572857 0.016572857 0.010631645 0.006566604 0.006566604 0.0 6.2539085E-4 0.0087554725
[86] 'ST914'    0.07692308 0.078486554 0.07879925 0.078486554 0.005628518 0.010006254 0.010318949 0.010631645 0.009068168 0.0053158225 0.005941213 0.006566604 0.005628518 0.0053158225 0.005941213 0.0040650405 0.011569731 0.009068168 0.010318949 0.010318949 0.012820513 9.380863E-4 0.0012507817 0.0046904315 0.0018761726 0.007191995 0.0040650405 0.0012507817 0.0046904315 0.0040650405 0.008442776 0.0021888681 0.0040650405 0.0043777362 0.0043777362 0.0037523452 0.0040650405 0.0012507817 0.0040650405 0.005628518 0.0053158225 0.0040650405 0.0015634772 0.005628518 0.0043777362 0.0012507817 0.0043777362 0.0043777362 0.002814259 9.380863E-4 0.0037523452 0.0053158225 0.005003127 0.005003127 0.012507818 0.012507818 0.0043777362 0.006253909 0.0121951215 0.005003127 0.0053158225 0.0068792994 0.0043777362 0.0046904315 0.0021888681 0.012507818 0.002814259 0.005003127 0.012507818 0.0043777362 0.0040650405 0.0046904315 0.005003127 0.005628518 0.006253909 0.005003127 0.0053158225 0.005003127 0.015634771 0.015947467 0.015947467 0.010006254 0.005941213 0.005941213 6.2539085E-4 0.0 0.0087554725
[87] 'ST1117'   0.07817386 0.07911195 0.07942464 0.07911195 0.009380863 0.010006254 0.010318949 0.010631645 0.009693558 0.008442776 0.009068168 0.007817386 0.0068792994 0.007191995 0.007817386 0.008442776 0.011569731 0.009693558 0.010318949 0.010318949 0.013445904 0.008442776 0.0087554725 0.009068168 0.008130081 0.0053158225 0.008442776 0.0087554725 0.007817386 0.008442776 3.1269543E-4 0.008442776 0.008442776 0.0087554725 0.0087554725 0.008130081 0.008442776 0.008130081 0.008442776 0.0075046904 0.006566604 0.008442776 0.008442776 0.0068792994 0.0087554725 0.0087554725 0.0087554725 0.0087554725 0.009068168 0.009068168 0.009380863 0.009068168 0.0087554725 0.0087554725 0.013133208 0.012507818 0.0087554725 0.0075046904 0.012820513 0.0087554725 0.009068168 0.0087554725 0.0087554725 0.008442776 0.009693558 0.013133208 0.009693558 0.0087554725 0.013133208 0.0075046904 0.007191995 0.009068168 0.0087554725 0.009380863 0.009380863 0.009380863 0.009068168 0.0087554725 0.017510945 0.01782364 0.01782364 0.0075046904 0.009693558 0.009693558 0.0087554725 0.0087554725 0.0
;
END; [Distances]

BEGIN Splits;
DIMENSIONS ntax=87 nsplits=291;
FORMAT labels=no weights=yes confidences=no intervals=no;
PROPERTIES fit=96.464 cyclic;
CYCLE 1 4 2 3 81 80 79 19 20 21 66 69 55 59 56 17 18 7 8 6 9 82 31 87 26 58 41 44 13 14 29 57 72 52 53 54 68 60 64 73 61 83 5 84 71 70 62 15 40 12 16 34 24 33 37 35 39 27 48 47 42 36 30 45 32 49 50 85 86 22 28 46 23 43 38 25 65 67 75 76 77 74 78 51 10 63 11;
MATRIX
[1, size=1] 	 8.44729E-4 	  1 2 3 4 5 6 7 8 9 10 12 13 14 15 16 17 18 19 20 21 22 23 24 25 26 27 28 29 30 31 32 33 34 35 36 37 38 39 40 41 42 43 44 45 46 47 48 49 50 51 52 53 54 55 56 57 58 59 60 61 62 63 64 65 66 67 68 69 70 71 72 73 74 75 76 77 78 79 80 81 82 83 84 85 86 87,
[2, size=4] 	 2.850663E-4 	  1 2 3 4 5 6 7 8 9 12 13 14 15 16 17 18 19 20 21 22 23 24 25 26 27 28 29 30 31 32 33 34 35 36 37 38 39 40 41 42 43 44 45 46 47 48 49 50 52 53 54 55 56 57 58 59 60 61 62 64 65 66 67 68 69 70 71 72 73 74 75 76 77 78 79 80 81 82 83 84 85 86 87,
[3, size=7] 	 6.548075E-5 	  1 2 3 4 5 6 7 8 9 12 13 14 15 16 17 18 19 20 21 22 23 24 25 26 27 28 29 30 31 32 33 34 35 36 37 38 39 40 41 42 43 44 45 46 47 48 49 50 52 53 54 55 56 57 58 59 60 61 62 64 65 66 67 68 69 70 71 72 73 75 76 79 80 81 82 83 84 85 86 87,
[4, size=36] 	 3.3955192E-4 	  1 2 3 4 5 6 7 8 9 12 13 14 15 16 17 18 19 20 21 26 29 31 40 41 44 52 53 54 55 56 57 58 59 60 61 62 64 66 68 69 70 71 72 73 79 80 81 82 83 84 87,
[5, size=38] 	 4.9485734E-5 	  1 2 3 4 5 6 7 8 9 13 14 15 17 18 19 20 21 26 29 31 40 41 44 52 53 54 55 56 57 58 59 60 61 62 64 66 68 69 70 71 72 73 79 80 81 82 83 84 87,
[6, size=39] 	 2.6583479E-5 	  1 2 3 4 5 6 7 8 9 13 14 15 17 18 19 20 21 26 29 31 41 44 52 53 54 55 56 57 58 59 60 61 62 64 66 68 69 70 71 72 73 79 80 81 82 83 84 87,
[7, size=24] 	 3.8273618E-4 	  1 2 3 4 6 7 8 9 17 18 19 20 21 31 55 56 59 66 69 79 80 81 82 87,
[8, size=22] 	 4.519092E-4 	  1 2 3 4 6 7 8 9 17 18 19 20 21 55 56 59 66 69 79 80 81 82,
[9, size=20] 	 6.699251E-4 	  1 2 3 4 6 7 8 17 18 19 20 21 55 56 59 66 69 79 80 81,
[10, size=16] 	 3.798332E-4 	  1 2 3 4 17 19 20 21 55 56 59 66 69 79 80 81,
[11, size=15] 	 1.6286554E-5 	  1 2 3 4 19 20 21 55 56 59 66 69 79 80 81,
[12, size=7] 	 0.0011604271 	  1 2 3 4 79 80 81,
[13, size=4] 	 0.06633507 	  1 2 3 4,
[14, size=2] 	 8.8906894E-4 	  1 4,
[15, size=1] 	 0.0024414284 	  1,
[16, size=1] 	 0.0010911534 	  1 2 3 4 5 6 7 8 9 10 11 12 13 14 15 16 17 18 19 20 21 22 23 24 25 26 27 28 29 30 31 32 33 34 35 36 37 38 39 40 41 42 43 44 45 46 47 48 49 50 51 52 53 54 55 56 57 58 59 60 61 62 64 65 66 67 68 69 70 71 72 73 74 75 76 77 78 79 80 81 82 83 84 85 86 87,
[17, size=2] 	 2.4649827E-4 	  1 2 3 4 5 6 7 8 9 11 12 13 14 15 16 17 18 19 20 21 22 23 24 25 26 27 28 29 30 31 32 33 34 35 36 37 38 39 40 41 42 43 44 45 46 47 48 49 50 51 52 53 54 55 56 57 58 59 60 61 62 64 65 66 67 68 69 70 71 72 73 74 75 76 77 78 79 80 81 82 83 84 85 86 87,
[18, size=20] 	 8.42554E-5 	  1 2 3 4 5 6 7 8 9 11 12 13 14 15 16 17 18 19 20 21 24 26 27 29 30 31 32 33 34 35 36 37 39 40 41 42 44 45 47 48 49 52 53 54 55 56 57 58 59 60 61 62 64 66 68 69 70 71 72 73 79 80 81 82 83 84 87,
[19, size=36] 	 2.9299056E-4 	  1 2 3 4 5 6 7 8 9 11 12 13 14 15 17 18 19 20 21 26 29 31 40 41 44 52 53 54 55 56 57 58 59 60 61 62 64 66 68 69 70 71 72 73 79 80 81 82 83 84 87,
[20, size=37] 	 2.5193922E-5 	  1 2 3 4 5 6 7 8 9 11 13 14 15 17 18 19 20 21 26 29 31 40 41 44 52 53 54 55 56 57 58 59 60 61 62 64 66 68 69 70 71 72 73 79 80 81 82 83 84 87,
[21, size=23] 	 1.12657755E-4 	  1 2 3 4 6 7 8 9 11 17 18 19 20 21 55 56 59 66 69 79 80 81 82,
[22, size=16] 	 9.58384E-5 	  1 2 3 4 11 19 20 21 55 56 59 66 69 79 80 81,
[23, size=5] 	 2.7424336E-4 	  1 2 3 4 11,
[24, size=1] 	 0.0015885155 	  1 2 3 4 5 6 7 8 9 11 12 13 14 15 16 17 18 19 20 21 22 23 24 25 26 27 28 29 30 31 32 33 34 35 36 37 38 39 40 41 42 43 44 45 46 47 48 49 50 51 52 53 54 55 56 57 58 59 60 61 62 63 64 65 66 67 68 69 70 71 72 73 74 75 76 77 78 79 80 81 82 83 84 85 86 87,
[25, size=2] 	 1.4818918E-4 	  1 2 3 4 5 6 7 8 9 11 12 13 14 15 16 17 18 19 20 21 22 23 24 25 26 27 28 29 30 31 32 33 34 35 36 37 38 39 40 41 42 43 44 45 46 47 48 49 50 52 53 54 55 56 57 58 59 60 61 62 63 64 65 66 67 68 69 70 71 72 73 74 75 76 77 78 79 80 81 82 83 84 85 86 87,
[26, size=3] 	 2.222342E-5 	  1 2 3 4 5 6 7 8 9 11 12 13 14 15 16 17 18 19 20 21 22 23 24 25 26 27 28 29 30 31 32 33 34 35 36 37 38 39 40 41 42 43 44 45 46 47 48 49 50 52 53 54 55 56 57 58 59 60 61 62 63 64 65 66 67 68 69 70 71 72 73 74 75 76 77 79 80 81 82 83 84 85 86 87,
[27, size=4] 	 2.2382672E-5 	  1 2 3 4 5 6 7 8 9 11 12 13 14 15 16 17 18 19 20 21 22 23 24 25 26 27 28 29 30 31 32 33 34 35 36 37 38 39 40 41 42 43 44 45 46 47 48 49 50 52 53 54 55 56 57 58 59 60 61 62 63 64 65 66 67 68 69 70 71 72 73 75 76 77 79 80 81 82 83 84 85 86 87,
[28, size=5] 	 6.0046976E-5 	  1 2 3 4 5 6 7 8 9 11 12 13 14 15 16 17 18 19 20 21 22 23 24 25 26 27 28 29 30 31 32 33 34 35 36 37 38 39 40 41 42 43 44 45 46 47 48 49 50 52 53 54 55 56 57 58 59 60 61 62 63 64 65 66 67 68 69 70 71 72 73 75 76 79 80 81 82 83 84 85 86 87,
[29, size=1] 	 7.4675854E-4 	  1 2 3 4 5 6 7 8 9 10 11 12 13 14 15 16 17 18 19 20 21 22 23 24 25 26 27 28 29 30 31 32 33 34 35 36 37 38 39 40 41 42 43 44 45 46 47 48 49 50 52 53 54 55 56 57 58 59 60 61 62 63 64 65 66 67 68 69 70 71 72 73 74 75 76 77 78 79 80 81 82 83 84 85 86 87,
[30, size=2] 	 2.5029492E-5 	  1 2 3 4 5 6 7 8 9 10 11 12 13 14 15 16 17 18 19 20 21 22 23 24 25 26 27 28 29 30 31 32 33 34 35 36 37 38 39 40 41 42 43 44 45 46 47 48 49 50 52 53 54 55 56 57 58 59 60 61 62 63 64 65 66 67 68 69 70 71 72 73 74 75 76 77 79 80 81 82 83 84 85 86 87,
[31, size=3] 	 6.3166546E-5 	  1 2 3 4 5 6 7 8 9 10 11 12 13 14 15 16 17 18 19 20 21 22 23 24 25 26 27 28 29 30 31 32 33 34 35 36 37 38 39 40 41 42 43 44 45 46 47 48 49 50 52 53 54 55 56 57 58 59 60 61 62 63 64 65 66 67 68 69 70 71 72 73 75 76 77 79 80 81 82 83 84 85 86 87,
[32, size=4] 	 1.5994703E-4 	  1 2 3 4 5 6 7 8 9 10 11 12 13 14 15 16 17 18 19 20 21 22 23 24 25 26 27 28 29 30 31 32 33 34 35 36 37 38 39 40 41 42 43 44 45 46 47 48 49 50 52 53 54 55 56 57 58 59 60 61 62 63 64 65 66 67 68 69 70 71 72 73 75 76 79 80 81 82 83 84 85 86 87,
[33, size=6] 	 1.3230962E-4 	  1 2 3 4 5 6 7 8 9 10 11 12 13 14 15 16 17 18 19 20 21 22 23 24 25 26 27 28 29 30 31 32 33 34 35 36 37 38 39 40 41 42 43 44 45 46 47 48 49 50 52 53 54 55 56 57 58 59 60 61 62 63 64 65 66 67 68 69 70 71 72 73 79 80 81 82 83 84 85 86 87,
[34, size=15] 	 1.184723E-4 	  1 2 3 4 5 6 7 8 9 10 11 12 13 14 15 16 17 18 19 20 21 24 26 27 29 30 31 32 33 34 35 36 37 39 40 41 42 44 45 47 48 49 50 52 53 54 55 56 57 58 59 60 61 62 63 64 66 68 69 70 71 72 73 79 80 81 82 83 84 85 86 87,
[35, size=18] 	 2.634543E-5 	  1 2 3 4 10 11 19 20 21 55 56 59 63 66 69 79 80 81,
[36, size=10] 	 6.082377E-5 	  1 2 3 4 10 11 63 79 80 81,
[37, size=5] 	 0.0015572109 	  1 2 3 4 5 6 7 8 9 10 11 12 13 14 15 16 17 18 19 20 21 22 23 24 25 26 27 28 29 30 31 32 33 34 35 36 37 38 39 40 41 42 43 44 45 46 47 48 49 50 51 52 53 54 55 56 57 58 59 60 61 62 63 64 65 66 67 68 69 70 71 72 73 79 80 81 82 83 84 85 86 87,
[38, size=8] 	 1.5542519E-5 	  1 2 3 4 10 11 51 63,
[39, size=1] 	 3.1953526E-4 	  1 2 3 4 5 6 7 8 9 10 11 12 13 14 15 16 17 18 19 20 21 22 23 24 25 26 27 28 29 30 31 32 33 34 35 36 37 38 39 40 41 42 43 44 45 46 47 48 49 50 51 52 53 54 55 56 57 58 59 60 61 62 63 64 65 66 67 68 69 70 71 72 73 75 76 77 78 79 80 81 82 83 84 85 86 87,
[40, size=2] 	 6.5367356E-5 	  1 2 3 4 5 6 7 8 9 10 11 12 13 14 15 16 17 18 19 20 21 22 23 24 25 26 27 28 29 30 31 32 33 34 35 36 37 38 39 40 41 42 43 44 45 46 47 48 49 50 51 52 53 54 55 56 57 58 59 60 61 62 63 64 65 66 67 68 69 70 71 72 73 75 76 78 79 80 81 82 83 84 85 86 87,
[41, size=3] 	 7.0853945E-5 	  1 2 3 4 5 6 7 8 9 10 11 12 13 14 15 16 17 18 19 20 21 22 23 24 25 26 27 28 29 30 31 32 33 34 35 36 37 38 39 40 41 42 43 44 45 46 47 48 49 50 51 52 53 54 55 56 57 58 59 60 61 62 63 64 65 66 67 68 69 70 71 72 73 75 78 79 80 81 82 83 84 85 86 87,
[42, size=4] 	 2.1434583E-4 	  1 2 3 4 5 6 7 8 9 10 11 12 13 14 15 16 17 18 19 20 21 22 23 24 25 26 27 28 29 30 31 32 33 34 35 36 37 38 39 40 41 42 43 44 45 46 47 48 49 50 51 52 53 54 55 56 57 58 59 60 61 62 63 64 65 66 67 68 69 70 71 72 73 78 79 80 81 82 83 84 85 86 87,
[43, size=1] 	 4.7207344E-5 	  1 2 3 4 5 6 7 8 9 10 11 12 13 14 15 16 17 18 19 20 21 22 23 24 25 26 27 28 29 30 31 32 33 34 35 36 37 38 39 40 41 42 43 44 45 46 47 48 49 50 51 52 53 54 55 56 57 58 59 60 61 62 63 64 65 66 67 68 69 70 71 72 73 74 75 76 78 79 80 81 82 83 84 85 86 87,
[44, size=2] 	 5.0168375E-5 	  1 2 3 4 5 6 7 8 9 10 11 12 13 14 15 16 17 18 19 20 21 22 23 24 25 26 27 28 29 30 31 32 33 34 35 36 37 38 39 40 41 42 43 44 45 46 47 48 49 50 51 52 53 54 55 56 57 58 59 60 61 62 63 64 65 66 67 68 69 70 71 72 73 74 75 78 79 80 81 82 83 84 85 86 87,
[45, size=1] 	 2.8441797E-4 	  1 2 3 4 5 6 7 8 9 10 11 12 13 14 15 16 17 18 19 20 21 22 23 24 25 26 27 28 29 30 31 32 33 34 35 36 37 38 39 40 41 42 43 44 45 46 47 48 49 50 51 52 53 54 55 56 57 58 59 60 61 62 63 64 65 66 67 68 69 70 71 72 73 74 75 77 78 79 80 81 82 83 84 85 86 87,
[46, size=1] 	 8.344757E-5 	  1 2 3 4 5 6 7 8 9 10 11 12 13 14 15 16 17 18 19 20 21 22 23 24 25 26 27 28 29 30 31 32 33 34 35 36 37 38 39 40 41 42 43 44 45 46 47 48 49 50 51 52 53 54 55 56 57 58 59 60 61 62 63 64 65 66 67 68 69 70 71 72 73 74 76 77 78 79 80 81 82 83 84 85 86 87,
[47, size=2] 	 3.7116327E-4 	  1 2 3 4 5 6 7 8 9 10 11 12 13 14 15 16 17 18 19 20 21 22 23 24 25 26 27 28 29 30 31 32 33 34 35 36 37 38 39 40 41 42 43 44 45 46 47 48 49 50 51 52 53 54 55 56 57 58 59 60 61 62 63 64 65 66 68 69 70 71 72 73 74 76 77 78 79 80 81 82 83 84 85 86 87,
[48, size=30] 	 1.5474152E-5 	  1 2 3 4 6 7 8 9 10 11 17 18 19 20 21 51 55 56 59 63 66 69 74 76 77 78 79 80 81 82,
[49, size=23] 	 2.439256E-5 	  1 2 3 4 10 11 19 20 21 51 55 56 59 63 66 69 74 76 77 78 79 80 81,
[50, size=1] 	 4.4119246E-5 	  1 2 3 4 5 6 7 8 9 10 11 12 13 14 15 16 17 18 19 20 21 22 23 24 25 26 27 28 29 30 31 32 33 34 35 36 37 38 39 40 41 42 43 44 45 46 47 48 49 50 51 52 53 54 55 56 57 58 59 60 61 62 63 64 65 66 68 69 70 71 72 73 74 75 76 77 78 79 80 81 82 83 84 85 86 87,
[51, size=2] 	 4.802243E-4 	  1 2 3 4 5 6 7 8 9 10 11 12 13 14 15 16 17 18 19 20 21 22 23 24 25 26 27 28 29 30 31 32 33 34 35 36 37 38 39 40 41 42 43 44 45 46 47 48 49 50 51 52 53 54 55 56 57 58 59 60 61 62 63 64 66 68 69 70 71 72 73 74 75 76 77 78 79 80 81 82 83 84 85 86 87,
[52, size=12] 	 1.6015938E-6 	  1 2 3 4 5 6 7 8 9 10 11 12 13 14 15 16 17 18 19 20 21 24 26 27 29 30 31 32 33 34 35 36 37 39 40 41 42 44 45 47 48 49 51 52 53 54 55 56 57 58 59 60 61 62 63 64 66 68 69 70 71 72 73 74 75 76 77 78 79 80 81 82 83 84 87,
[53, size=14] 	 5.139968E-4 	  1 2 3 4 5 6 7 8 9 10 11 12 13 14 15 16 17 18 19 20 21 24 26 27 29 30 31 33 34 35 36 37 39 40 41 42 44 45 47 48 51 52 53 54 55 56 57 58 59 60 61 62 63 64 66 68 69 70 71 72 73 74 75 76 77 78 79 80 81 82 83 84 87,
[54, size=24] 	 6.5575405E-5 	  1 2 3 4 10 11 19 20 21 51 55 56 59 63 66 69 74 75 76 77 78 79 80 81,
[55, size=1] 	 5.700763E-4 	  1 2 3 4 5 6 7 8 9 10 11 12 13 14 15 16 17 18 19 20 21 22 23 24 25 26 27 28 29 30 31 32 33 34 35 36 37 38 39 40 41 42 43 44 45 46 47 48 49 50 51 52 53 54 55 56 57 58 59 60 61 62 63 64 66 67 68 69 70 71 72 73 74 75 76 77 78 79 80 81 82 83 84 85 86 87,
[56, size=10] 	 1.3068797E-4 	  1 2 3 4 5 6 7 8 9 10 11 12 13 14 15 16 17 18 19 20 21 24 26 27 29 30 31 32 33 34 35 36 37 39 40 41 42 44 45 47 48 49 50 51 52 53 54 55 56 57 58 59 60 61 62 63 64 66 67 68 69 70 71 72 73 74 75 76 77 78 79 80 81 82 83 84 87,
[57, size=11] 	 2.685685E-6 	  1 2 3 4 5 6 7 8 9 10 11 12 13 14 15 16 17 18 19 20 21 24 26 27 29 30 31 32 33 34 35 36 37 39 40 41 42 44 45 47 48 49 51 52 53 54 55 56 57 58 59 60 61 62 63 64 66 67 68 69 70 71 72 73 74 75 76 77 78 79 80 81 82 83 84 87,
[58, size=12] 	 2.875166E-4 	  1 2 3 4 5 6 7 8 9 10 11 12 13 14 15 16 17 18 19 20 21 24 26 27 29 30 31 32 33 34 35 36 37 39 40 41 42 44 45 47 48 51 52 53 54 55 56 57 58 59 60 61 62 63 64 66 67 68 69 70 71 72 73 74 75 76 77 78 79 80 81 82 83 84 87,
[59, size=13] 	 1.587673E-6 	  1 2 3 4 5 6 7 8 9 10 11 12 13 14 15 16 17 18 19 20 21 24 26 27 29 30 31 33 34 35 36 37 39 40 41 42 44 45 47 48 51 52 53 54 55 56 57 58 59 60 61 62 63 64 66 67 68 69 70 71 72 73 74 75 76 77 78 79 80 81 82 83 84 87,
[60, size=14] 	 6.374216E-5 	  1 2 3 4 5 6 7 8 9 10 11 12 13 14 15 16 17 18 19 20 21 24 26 27 29 30 31 33 34 35 36 37 39 40 41 42 44 47 48 51 52 53 54 55 56 57 58 59 60 61 62 63 64 66 67 68 69 70 71 72 73 74 75 76 77 78 79 80 81 82 83 84 87,
[61, size=15] 	 1.0213948E-5 	  1 2 3 4 5 6 7 8 9 10 11 12 13 14 15 16 17 18 19 20 21 24 26 27 29 31 33 34 35 36 37 39 40 41 42 44 47 48 51 52 53 54 55 56 57 58 59 60 61 62 63 64 66 67 68 69 70 71 72 73 74 75 76 77 78 79 80 81 82 83 84 87,
[62, size=1] 	 2.7951272E-4 	  1 2 3 4 5 6 7 8 9 10 11 12 13 14 15 16 17 18 19 20 21 22 23 24 26 27 28 29 30 31 32 33 34 35 36 37 38 39 40 41 42 43 44 45 46 47 48 49 50 51 52 53 54 55 56 57 58 59 60 61 62 63 64 65 66 67 68 69 70 71 72 73 74 75 76 77 78 79 80 81 82 83 84 85 86 87,
[63, size=3] 	 3.326705E-5 	  1 2 3 4 5 6 7 8 9 10 11 12 13 14 15 16 17 18 19 20 21 22 23 24 26 27 28 29 30 31 32 33 34 35 36 37 39 40 41 42 44 45 46 47 48 49 50 51 52 53 54 55 56 57 58 59 60 61 62 63 64 65 66 67 68 69 70 71 72 73 74 75 76 77 78 79 80 81 82 83 84 85 86 87,
[64, size=7] 	 1.3169751E-4 	  1 2 3 4 5 6 7 8 9 10 11 12 13 14 15 16 17 18 19 20 21 24 26 27 29 30 31 32 33 34 35 36 37 39 40 41 42 44 45 47 48 49 50 51 52 53 54 55 56 57 58 59 60 61 62 63 64 65 66 67 68 69 70 71 72 73 74 75 76 77 78 79 80 81 82 83 84 85 86 87,
[65, size=8] 	 1.0265737E-6 	  1 2 3 4 5 6 7 8 9 10 11 12 13 14 15 16 17 18 19 20 21 24 26 27 29 30 31 32 33 34 35 36 37 39 40 41 42 44 45 47 48 49 50 51 52 53 54 55 56 57 58 59 60 61 62 63 64 65 66 67 68 69 70 71 72 73 74 75 76 77 78 79 80 81 82 83 84 85 87,
[66, size=9] 	 1.2041529E-6 	  1 2 3 4 5 6 7 8 9 10 11 12 13 14 15 16 17 18 19 20 21 24 26 27 29 30 31 32 33 34 35 36 37 39 40 41 42 44 45 47 48 49 50 51 52 53 54 55 56 57 58 59 60 61 62 63 64 65 66 67 68 69 70 71 72 73 74 75 76 77 78 79 80 81 82 83 84 87,
[67, size=10] 	 2.8030997E-6 	  1 2 3 4 5 6 7 8 9 10 11 12 13 14 15 16 17 18 19 20 21 24 26 27 29 30 31 32 33 34 35 36 37 39 40 41 42 44 45 47 48 49 51 52 53 54 55 56 57 58 59 60 61 62 63 64 65 66 67 68 69 70 71 72 73 74 75 76 77 78 79 80 81 82 83 84 87,
[68, size=11] 	 1.5901873E-6 	  1 2 3 4 5 6 7 8 9 10 11 12 13 14 15 16 17 18 19 20 21 24 26 27 29 30 31 32 33 34 35 36 37 39 40 41 42 44 45 47 48 51 52 53 54 55 56 57 58 59 60 61 62 63 64 65 66 67 68 69 70 71 72 73 74 75 76 77 78 79 80 81 82 83 84 87,
[69, size=12] 	 1.8753958E-6 	  1 2 3 4 5 6 7 8 9 10 11 12 13 14 15 16 17 18 19 20 21 24 26 27 29 30 31 33 34 35 36 37 39 40 41 42 44 45 47 48 51 52 53 54 55 56 57 58 59 60 61 62 63 64 65 66 67 68 69 70 71 72 73 74 75 76 77 78 79 80 81 82 83 84 87,
[70, size=13] 	 1.0747268E-6 	  1 2 3 4 5 6 7 8 9 10 11 12 13 14 15 16 17 18 19 20 21 24 26 27 29 30 31 33 34 35 36 37 39 40 41 42 44 47 48 51 52 53 54 55 56 57 58 59 60 61 62 63 64 65 66 67 68 69 70 71 72 73 74 75 76 77 78 79 80 81 82 83 84 87,
[71, size=28] 	 5.3649674E-6 	  1 2 3 4 5 6 7 8 9 10 11 13 14 15 17 18 19 20 21 26 29 31 41 44 51 52 53 54 55 56 57 58 59 60 61 62 63 64 65 66 67 68 69 70 71 72 73 74 75 76 77 78 79 80 81 82 83 84 87,
[72, size=1] 	 3.985458E-5 	  1 2 3 4 5 6 7 8 9 10 11 12 13 14 15 16 17 18 19 20 21 22 23 24 25 26 27 28 29 30 31 32 33 34 35 36 37 39 40 41 42 43 44 45 46 47 48 49 50 51 52 53 54 55 56 57 58 59 60 61 62 63 64 65 66 67 68 69 70 71 72 73 74 75 76 77 78 79 80 81 82 83 84 85 86 87,
[73, size=3] 	 3.2857475E-5 	  1 2 3 4 5 6 7 8 9 10 11 12 13 14 15 16 17 18 19 20 21 22 24 25 26 27 28 29 30 31 32 33 34 35 36 37 39 40 41 42 44 45 46 47 48 49 50 51 52 53 54 55 56 57 58 59 60 61 62 63 64 65 66 67 68 69 70 71 72 73 74 75 76 77 78 79 80 81 82 83 84 85 86 87,
[74, size=4] 	 3.8352355E-5 	  1 2 3 4 5 6 7 8 9 10 11 12 13 14 15 16 17 18 19 20 21 22 24 25 26 27 28 29 30 31 32 33 34 35 36 37 39 40 41 42 44 45 47 48 49 50 51 52 53 54 55 56 57 58 59 60 61 62 63 64 65 66 67 68 69 70 71 72 73 74 75 76 77 78 79 80 81 82 83 84 85 86 87,
[75, size=5] 	 3.794818E-5 	  1 2 3 4 5 6 7 8 9 10 11 12 13 14 15 16 17 18 19 20 21 22 24 25 26 27 29 30 31 32 33 34 35 36 37 39 40 41 42 44 45 47 48 49 50 51 52 53 54 55 56 57 58 59 60 61 62 63 64 65 66 67 68 69 70 71 72 73 74 75 76 77 78 79 80 81 82 83 84 85 86 87,
[76, size=7] 	 4.2508287E-5 	  1 2 3 4 5 6 7 8 9 10 11 12 13 14 15 16 17 18 19 20 21 24 25 26 27 29 30 31 32 33 34 35 36 37 39 40 41 42 44 45 47 48 49 50 51 52 53 54 55 56 57 58 59 60 61 62 63 64 65 66 67 68 69 70 71 72 73 74 75 76 77 78 79 80 81 82 83 84 85 87,
[77, size=8] 	 1.0147661E-6 	  1 2 3 4 5 6 7 8 9 10 11 12 13 14 15 16 17 18 19 20 21 24 25 26 27 29 30 31 32 33 34 35 36 37 39 40 41 42 44 45 47 48 49 50 51 52 53 54 55 56 57 58 59 60 61 62 63 64 65 66 67 68 69 70 71 72 73 74 75 76 77 78 79 80 81 82 83 84 87,
[78, size=9] 	 2.4814883E-6 	  1 2 3 4 5 6 7 8 9 10 11 12 13 14 15 16 17 18 19 20 21 24 25 26 27 29 30 31 32 33 34 35 36 37 39 40 41 42 44 45 47 48 49 51 52 53 54 55 56 57 58 59 60 61 62 63 64 65 66 67 68 69 70 71 72 73 74 75 76 77 78 79 80 81 82 83 84 87,
[79, size=10] 	 1.4489659E-6 	  1 2 3 4 5 6 7 8 9 10 11 12 13 14 15 16 17 18 19 20 21 24 25 26 27 29 30 31 32 33 34 35 36 37 39 40 41 42 44 45 47 48 51 52 53 54 55 56 57 58 59 60 61 62 63 64 65 66 67 68 69 70 71 72 73 74 75 76 77 78 79 80 81 82 83 84 87,
[80, size=11] 	 1.7173172E-6 	  1 2 3 4 5 6 7 8 9 10 11 12 13 14 15 16 17 18 19 20 21 24 25 26 27 29 30 31 33 34 35 36 37 39 40 41 42 44 45 47 48 51 52 53 54 55 56 57 58 59 60 61 62 63 64 65 66 67 68 69 70 71 72 73 74 75 76 77 78 79 80 81 82 83 84 87,
[81, size=12] 	 1.0408306E-6 	  1 2 3 4 5 6 7 8 9 10 11 12 13 14 15 16 17 18 19 20 21 24 25 26 27 29 30 31 33 34 35 36 37 39 40 41 42 44 47 48 51 52 53 54 55 56 57 58 59 60 61 62 63 64 65 66 67 68 69 70 71 72 73 74 75 76 77 78 79 80 81 82 83 84 87,
[82, size=21] 	 9.1505335E-6 	  1 2 3 4 5 6 7 8 9 10 11 12 13 14 15 16 17 18 19 20 21 24 25 26 29 31 33 34 40 41 44 51 52 53 54 55 56 57 58 59 60 61 62 63 64 65 66 67 68 69 70 71 72 73 74 75 76 77 78 79 80 81 82 83 84 87,
[83, size=23] 	 5.228611E-5 	  1 2 3 4 5 6 7 8 9 10 11 12 13 14 15 16 17 18 19 20 21 25 26 29 31 34 40 41 44 51 52 53 54 55 56 57 58 59 60 61 62 63 64 65 66 67 68 69 70 71 72 73 74 75 76 77 78 79 80 81 82 83 84 87,
[84, size=25] 	 4.8837086E-5 	  1 2 3 4 5 6 7 8 9 10 11 12 13 14 15 17 18 19 20 21 25 26 29 31 40 41 44 51 52 53 54 55 56 57 58 59 60 61 62 63 64 65 66 67 68 69 70 71 72 73 74 75 76 77 78 79 80 81 82 83 84 87,
[85, size=26] 	 2.299702E-4 	  1 2 3 4 5 6 7 8 9 10 11 13 14 15 17 18 19 20 21 25 26 29 31 40 41 44 51 52 53 54 55 56 57 58 59 60 61 62 63 64 65 66 67 68 69 70 71 72 73 74 75 76 77 78 79 80 81 82 83 84 87,
[86, size=27] 	 1.3107052E-5 	  1 2 3 4 5 6 7 8 9 10 11 13 14 15 17 18 19 20 21 25 26 29 31 41 44 51 52 53 54 55 56 57 58 59 60 61 62 63 64 65 66 67 68 69 70 71 72 73 74 75 76 77 78 79 80 81 82 83 84 87,
[87, size=28] 	 8.831471E-6 	  1 2 3 4 5 6 7 8 9 10 11 13 14 17 18 19 20 21 25 26 29 31 41 44 51 52 53 54 55 56 57 58 59 60 61 62 63 64 65 66 67 68 69 70 71 72 73 74 75 76 77 78 79 80 81 82 83 84 87,
[88, size=2] 	 3.142826E-4 	  1 2 3 4 5 6 7 8 9 10 11 12 13 14 15 16 17 18 19 20 21 22 24 25 26 27 28 29 30 31 32 33 34 35 36 37 38 39 40 41 42 44 45 46 47 48 49 50 51 52 53 54 55 56 57 58 59 60 61 62 63 64 65 66 67 68 69 70 71 72 73 74 75 76 77 78 79 80 81 82 83 84 85 86 87,
[89, size=6] 	 1.3497733E-5 	  1 2 3 4 5 6 7 8 9 10 11 12 13 14 15 16 17 18 19 20 21 24 25 26 27 29 30 31 32 33 34 35 36 37 38 39 40 41 42 44 45 47 48 49 50 51 52 53 54 55 56 57 58 59 60 61 62 63 64 65 66 67 68 69 70 71 72 73 74 75 76 77 78 79 80 81 82 83 84 85 87,
[90, size=8] 	 1.6612477E-6 	  1 2 3 4 5 6 7 8 9 10 11 12 13 14 15 16 17 18 19 20 21 24 25 26 27 29 30 31 32 33 34 35 36 37 38 39 40 41 42 44 45 47 48 49 51 52 53 54 55 56 57 58 59 60 61 62 63 64 65 66 67 68 69 70 71 72 73 74 75 76 77 78 79 80 81 82 83 84 87,
[91, size=26] 	 4.570617E-6 	  1 2 3 4 5 6 7 8 9 10 11 13 14 15 17 18 19 20 21 25 26 29 31 38 41 44 51 52 53 54 55 56 57 58 59 60 61 62 63 64 65 66 67 68 69 70 71 72 73 74 75 76 77 78 79 80 81 82 83 84 87,
[92, size=7] 	 3.3242017E-4 	  1 2 3 4 5 6 7 8 9 10 11 12 13 14 15 16 17 18 19 20 21 24 25 26 27 29 30 31 32 33 34 35 36 37 38 39 40 41 42 43 44 45 47 48 49 51 52 53 54 55 56 57 58 59 60 61 62 63 64 65 66 67 68 69 70 71 72 73 74 75 76 77 78 79 80 81 82 83 84 87,
[93, size=1] 	 3.0310557E-4 	  1 2 3 4 5 6 7 8 9 10 11 12 13 14 15 16 17 18 19 20 21 22 23 24 25 26 27 28 29 30 31 32 33 34 35 36 37 38 39 40 41 42 43 44 45 47 48 49 50 51 52 53 54 55 56 57 58 59 60 61 62 63 64 65 66 67 68 69 70 71 72 73 74 75 76 77 78 79 80 81 82 83 84 85 86 87,
[94, size=6] 	 3.854279E-5 	  1 2 3 4 5 6 7 8 9 10 11 12 13 14 15 16 17 18 19 20 21 23 24 25 26 27 29 30 31 32 33 34 35 36 37 38 39 40 41 42 43 44 45 47 48 49 51 52 53 54 55 56 57 58 59 60 61 62 63 64 65 66 67 68 69 70 71 72 73 74 75 76 77 78 79 80 81 82 83 84 87,
[95, size=1] 	 3.0286526E-4 	  1 2 3 4 5 6 7 8 9 10 11 12 13 14 15 16 17 18 19 20 21 22 23 24 25 26 27 29 30 31 32 33 34 35 36 37 38 39 40 41 42 43 44 45 46 47 48 49 50 51 52 53 54 55 56 57 58 59 60 61 62 63 64 65 66 67 68 69 70 71 72 73 74 75 76 77 78 79 80 81 82 83 84 85 86 87,
[96, size=5] 	 3.9046725E-5 	  1 2 3 4 5 6 7 8 9 10 11 12 13 14 15 16 17 18 19 20 21 23 24 25 26 27 29 30 31 32 33 34 35 36 37 38 39 40 41 42 43 44 45 46 47 48 49 51 52 53 54 55 56 57 58 59 60 61 62 63 64 65 66 67 68 69 70 71 72 73 74 75 76 77 78 79 80 81 82 83 84 87,
[97, size=4] 	 3.8532224E-5 	  1 2 3 4 5 6 7 8 9 10 11 12 13 14 15 16 17 18 19 20 21 23 24 25 26 27 28 29 30 31 32 33 34 35 36 37 38 39 40 41 42 43 44 45 46 47 48 49 51 52 53 54 55 56 57 58 59 60 61 62 63 64 65 66 67 68 69 70 71 72 73 74 75 76 77 78 79 80 81 82 83 84 87,
[98, size=1] 	 1.6998953E-5 	  1 2 3 4 5 6 7 8 9 10 11 12 13 14 15 16 17 18 19 20 21 22 23 24 25 26 27 28 29 30 31 32 33 34 35 36 37 38 39 40 41 42 43 44 45 46 47 48 49 50 51 52 53 54 55 56 57 58 59 60 61 62 63 64 65 66 67 68 69 70 71 72 73 74 75 76 77 78 79 80 81 82 83 84 85 87,
[99, size=2] 	 3.3945028E-6 	  1 2 3 4 5 6 7 8 9 10 11 12 13 14 15 16 17 18 19 20 21 22 23 24 25 26 27 28 29 30 31 32 33 34 35 36 37 38 39 40 41 42 43 44 45 46 47 48 49 50 51 52 53 54 55 56 57 58 59 60 61 62 63 64 65 66 67 68 69 70 71 72 73 74 75 76 77 78 79 80 81 82 83 84 87,
[100, size=3] 	 4.0176345E-4 	  1 2 3 4 5 6 7 8 9 10 11 12 13 14 15 16 17 18 19 20 21 22 23 24 25 26 27 28 29 30 31 32 33 34 35 36 37 38 39 40 41 42 43 44 45 46 47 48 49 51 52 53 54 55 56 57 58 59 60 61 62 63 64 65 66 67 68 69 70 71 72 73 74 75 76 77 78 79 80 81 82 83 84 87,
[101, size=4] 	 1.5352046E-4 	  1 2 3 4 5 6 7 8 9 10 11 12 13 14 15 16 17 18 19 20 21 22 23 24 25 26 27 28 29 30 31 32 33 34 35 36 37 38 39 40 41 42 43 44 45 46 47 48 51 52 53 54 55 56 57 58 59 60 61 62 63 64 65 66 67 68 69 70 71 72 73 74 75 76 77 78 79 80 81 82 83 84 87,
[102, size=2] 	 6.828882E-4 	  1 2 3 4 5 6 7 8 9 10 11 12 13 14 15 16 17 18 19 20 21 22 23 24 25 26 27 28 29 30 31 32 33 34 35 36 37 38 39 40 41 42 43 44 45 46 47 48 49 51 52 53 54 55 56 57 58 59 60 61 62 63 64 65 66 67 68 69 70 71 72 73 74 75 76 77 78 79 80 81 82 83 84 86 87,
[103, size=1] 	 3.8028343E-4 	  1 2 3 4 5 6 7 8 9 10 11 12 13 14 15 16 17 18 19 20 21 22 23 24 25 26 27 28 29 30 31 32 33 34 35 36 37 38 39 40 41 42 43 44 45 46 47 48 49 51 52 53 54 55 56 57 58 59 60 61 62 63 64 65 66 67 68 69 70 71 72 73 74 75 76 77 78 79 80 81 82 83 84 85 86 87,
[104, size=1] 	 0.0016986174 	  1 2 3 4 5 6 7 8 9 10 11 12 13 14 15 16 17 18 19 20 21 22 23 24 25 26 27 28 29 30 31 32 33 34 35 36 37 38 39 40 41 42 43 44 45 46 47 48 50 51 52 53 54 55 56 57 58 59 60 61 62 63 64 65 66 67 68 69 70 71 72 73 74 75 76 77 78 79 80 81 82 83 84 85 86 87,
[105, size=1] 	 4.7864767E-5 	  1 2 3 4 5 6 7 8 9 10 11 12 13 14 15 16 17 18 19 20 21 22 23 24 25 26 27 28 29 30 31 33 34 35 36 37 38 39 40 41 42 43 44 45 46 47 48 49 50 51 52 53 54 55 56 57 58 59 60 61 62 63 64 65 66 67 68 69 70 71 72 73 74 75 76 77 78 79 80 81 82 83 84 85 86 87,
[106, size=14] 	 7.150365E-4 	  1 2 3 4 5 6 7 8 9 10 11 12 13 14 15 16 17 18 19 20 21 22 23 25 26 28 29 31 38 40 41 43 44 46 49 50 51 52 53 54 55 56 57 58 59 60 61 62 63 64 65 66 67 68 69 70 71 72 73 74 75 76 77 78 79 80 81 82 83 84 85 86 87,
[107, size=18] 	 2.8136234E-5 	  1 2 3 4 5 6 7 8 9 10 11 13 14 17 18 19 20 21 22 23 25 26 28 29 31 38 41 43 44 46 49 50 51 52 53 54 55 56 57 58 59 60 61 62 63 64 65 66 67 68 69 70 71 72 73 74 75 76 77 78 79 80 81 82 83 84 85 86 87,
[108, size=1] 	 5.562819E-4 	  1 2 3 4 5 6 7 8 9 10 11 12 13 14 15 16 17 18 19 20 21 22 23 24 25 26 27 28 29 30 31 32 33 34 35 36 37 38 39 40 41 42 43 44 46 47 48 49 50 51 52 53 54 55 56 57 58 59 60 61 62 63 64 65 66 67 68 69 70 71 72 73 74 75 76 77 78 79 80 81 82 83 84 85 86 87,
[109, size=11] 	 1.1593212E-6 	  1 2 3 4 5 6 7 8 9 10 11 12 13 14 15 16 17 18 19 20 21 22 23 24 25 26 28 29 31 32 34 38 40 41 43 44 46 49 50 51 52 53 54 55 56 57 58 59 60 61 62 63 64 65 66 67 68 69 70 71 72 73 74 75 76 77 78 79 80 81 82 83 84 85 86 87,
[110, size=12] 	 1.4120512E-6 	  1 2 3 4 5 6 7 8 9 10 11 12 13 14 15 16 17 18 19 20 21 22 23 25 26 28 29 31 32 34 38 40 41 43 44 46 49 50 51 52 53 54 55 56 57 58 59 60 61 62 63 64 65 66 67 68 69 70 71 72 73 74 75 76 77 78 79 80 81 82 83 84 85 86 87,
[111, size=13] 	 2.0254838E-6 	  1 2 3 4 5 6 7 8 9 10 11 12 13 14 15 16 17 18 19 20 21 22 23 25 26 28 29 31 32 38 40 41 43 44 46 49 50 51 52 53 54 55 56 57 58 59 60 61 62 63 64 65 66 67 68 69 70 71 72 73 74 75 76 77 78 79 80 81 82 83 84 85 86 87,
[112, size=17] 	 4.0464165E-5 	  1 2 3 4 5 6 7 8 9 10 11 13 14 17 18 19 20 21 22 23 25 26 28 29 31 32 38 41 43 44 46 49 50 51 52 53 54 55 56 57 58 59 60 61 62 63 64 65 66 67 68 69 70 71 72 73 74 75 76 77 78 79 80 81 82 83 84 85 86 87,
[113, size=18] 	 7.865744E-4 	  1 2 3 4 5 6 7 8 9 10 11 13 14 17 18 19 20 21 22 23 25 26 28 29 31 32 38 41 43 44 46 49 50 51 52 53 54 55 56 57 58 59 60 61 63 64 65 66 67 68 69 70 71 72 73 74 75 76 77 78 79 80 81 82 83 84 85 86 87,
[114, size=1] 	 3.153741E-4 	  1 2 3 4 5 6 7 8 9 10 11 12 13 14 15 16 17 18 19 20 21 22 23 24 25 26 27 28 29 31 32 33 34 35 36 37 38 39 40 41 42 43 44 45 46 47 48 49 50 51 52 53 54 55 56 57 58 59 60 61 62 63 64 65 66 67 68 69 70 71 72 73 74 75 76 77 78 79 80 81 82 83 84 85 86 87,
[115, size=12] 	 1.5419945E-6 	  1 2 3 4 5 6 7 8 9 10 11 12 13 14 15 16 17 18 19 20 21 22 23 25 26 28 29 31 32 38 40 41 43 44 45 46 49 50 51 52 53 54 55 56 57 58 59 60 61 62 63 64 65 66 67 68 69 70 71 72 73 74 75 76 77 78 79 80 81 82 83 84 85 86 87,
[116, size=16] 	 2.2143873E-5 	  1 2 3 4 5 6 7 8 9 10 11 13 14 17 18 19 20 21 22 23 25 26 28 29 31 32 38 41 43 44 45 46 49 50 51 52 53 54 55 56 57 58 59 60 61 62 63 64 65 66 67 68 69 70 71 72 73 74 75 76 77 78 79 80 81 82 83 84 85 86 87,
[truncated: 298,018 more chars]
