# Supplementary material for: A Field Guide to Pandemic, Epidemic and Sporadic Clones of Methicillin-Resistant Staphylococcus aureus
Source: PLoS One. 2011 Apr 6;6(4):e17936. doi: 10.1371/journal.pone.0017936 (PMC3071808; doi:10.1371/journal.pone.0017936)
Supplement: File S5 — "nexus"-file used for the network graph based on hybridisation profiles (Figure 5). (NEX) [file pone.0017936.s005.nex]

#nexus

BEGIN Taxa;
DIMENSIONS ntax=112;
TAXLABELS
[1] 'CC1-IV'
[2] 'CC1-IV-PVL'
[3] 'CC1-IV-SCCfus'
[4] 'CC1-IV-SCCfus-PVL'
[5] 'CC1-V-PVL'
[6] 'CC1-V-SCCfus'
[7] 'CC1-V-SCCfus-PVL'
[8] 'ST228-I'
[9] 'ST5-I-Geraldine'
[10] 'CC5-Ivar'
[11] 'CC5-II-Rhine-Hesse'
[12] 'CC5-II-ACME'
[13] 'CC5-III'
[14] 'CC5-IV-Paediat'
[15] 'CC5-IV-PVL'
[16] 'CC5-V'
[17] 'CC5-V-PVL'
[18] 'CC5-VI-NewPaed'
[19] 'ST5-VIISCC-JCSC6082'
[20] 'CC5-IVvar-Maltes'
[21] 'CC5-SCCMRSAZH47'
[22] 'CC5-IV-VI'
[23] 'CC5-IV-SCCfus'
[24] 'CC5-ST835'
[25] 'ST6-IV-WA51'
[26] 'ST6-V'
[27] 'CC7-IV'
[28] 'CC7-V'
[29] 'ST250-I-Early'
[30] 'ST247-I-North'
[31] 'CC8-IV-UK14'
[32] 'CC8-IV-Lyon'
[33] 'CC8-IV-UK-6'
[34] 'CC8-IV-USA500'
[35] 'ST8-IV-PVLACME-USA300'
[36] 'ST8-IV-PVL-USA300'
[37] 'CC8-IV-PVL-sed'
[38] 'CC8-IV-tst1'
[39] 'CC8-V'
[40] 'CC8-VIII'
[41] 'ST8-IIABCIrish'
[42] 'ST8-UK-12-13-IrishAR43'
[43] 'ST254-Hannover'
[44] 'ST254-IV-V-Hann'
[45] 'CC9-IV'
[46] 'CC12-WA59'
[47] 'CC12-IV'
[48] 'CC20-V'
[49] 'ST22-IV-Barnim'
[50] 'ST22-IV-ACME'
[51] 'ST22-IV-PVL'
[52] 'ST22-V'
[53] 'ST22-V-PVL'
[54] 'ST36-II-UK-16'
[55] 'ST30-IV-PVL-SWP'
[56] 'ST30-IV-tst1'
[57] 'CC30-V-PVL'
[58] 'ST45-II-USA600'
[59] 'ST45-IV-Berlin'
[60] 'CC45-IV-ACME'
[61] 'ST45-V-WA4'
[62] 'CC45-agrIV-IV-WA23'
[63] 'CC45-agrIV-V'
[64] 'CC45-agrIV-IV-V'
[65] 'CC59-IV-PVL-USA1000'
[66] 'ST59-IV-WA73'
[67] 'ST87-IV-WA24'
[68] 'ST59-IV-PVL-WA55'
[69] 'ST59-VT-PVL-Taiwan'
[70] 'ST59-V'
[71] 'CC59-V-PVL'
[72] 'ST59-IV-V-WA15'
[73] 'ST72-IV-USA700'
[74] 'ST72-IV-PVL-WA44'
[75] 'CC75-IV'
[76] 'ST883-IV-WA47'
[77] 'ST1303-IV'
[78] 'CC80-IV'
[79] 'CC80-IV-PVL-Europ'
[80] 'CC88-IV-WA2'
[81] 'CC88-IV-PVL'
[82] 'CC88-V-PVL'
[83] 'CC88-VI'
[84] 'ST93-IV'
[85] 'ST93-IV-PVL-Queen'
[86] 'ST93-V-PVL'
[87] 'CC97-IV-WA54'
[88] 'CC97-V'
[89] 'CC97-V-ACME'
[90] 'CC97-I-V'
[91] 'CC121-V-WA22'
[92] 'CC152-V-PVL'
[93] 'ST154-PVL'
[94] 'ST188-IV-WA38'
[95] 'ST188-V'
[96] 'ST239-III'
[97] 'CC361-IV-WA29'
[98] 'CC361-V'
[99] 'CC361-VIII-WA28'
[100] 'CC398-IV'
[101] 'ST398-V'
[102] 'ST398-V-PVL'
[103] 'CC509-ST207-V'
[104] 'ST573-V-WA10'
[105] 'ST772-V-PVL-Bengal'
[106] 'ST779'
[107] 'ST834-IV-WA13'
[108] 'CC913-IV'
[109] 'ST1048-IV-ACME'
[110] 'ST1774-IV-ACME'
[111] 'CC15-MSSA'
[112] 'ST426-MSSA'
;
END; [Taxa]

BEGIN Characters;
DIMENSIONS nchar=308;
FORMAT
	datatype=DNA
	missing=?
	gap=-
	symbols="atgc"
	labels=no
	transpose=no
	interleave=no
;
MATRIX
ccccccccccggcgccccggggccggggggggggggggggtttggtgggggggggtgggtgggttggggggggggttgtggcggggggtgttggggcggtgggggtggggccaaggggccccgcccccccttttggggggggggccgccccccccgcgcggcgccgcgcgcgcccagccccgcggggcgcgcgcggggggcccccccgcccggggccggcccgcacccccggccgccggcgcgagcggcggccgccccgggcccccggcccgggcacacgcccgggcggccgggcggcgggcgcgccg
ccccccccccggcgccccgggaccggggggggggggggggcccggtggggggggggggggggggtggggggggggttggggcggggggtggttgggcggttggggtggggccacccggccccgcccccccgcgcggggggggggccgccacccccgcgcggcgccgcgcacgcccagccccgcggggcgcgcgcggggggcccccccgcccggggccggcccgcacccccggccgccggcgcgagcggcggccgccccgggcccccggcccgggcacacgcccgggcggccgggcggcgggcgcgccg
ccccccccccggcgccccccggccggggggggggggggggcccggtggggggggggtggtgcttgggggggggggggggggcggggggtgggggggcggtgggggtggggccacggggccccgcccccccgtgtggggggggggccgccccccccgcgcggcgccgcgcacgcccaaccccgcgaggcgcgcgcggggggcccccccgcccggggccggcccgcacccccggccgccggcgcgagcggcggccgccccgggcccccggcccgggcacacgcccgggcggccgggcggcgggcgcgccg
cccaccccccggagccccccggccgggggggggaggggggcccggggggggggggggggggcgggggggggggggggggggcggggggcgggggggcggcgggggcggggccaaccggccacgccccacagcgcggggggggggccgccacccccgcgcggcaccgcgcacgcccaaccacgcgaggcgcgcgcggggggcccccccgcccgaggccggcccgcacccccggccgccggcgcgagcggcggccgccccgggccccaggcccgggcacacgcccgggaggccgggcggagggcgcgccg
ccccccccccggcgccgcggggggggggggggggggccggcccggggggggggggggggggggtgggggggggggggggggcggggggcgggggggcggcgggggcggggccacccggccccgcccccccgcgcggggggggggccgccccccccgcgcggcaccgcgcacgccacaccccgcaaggcgcgcgcggggggcccccccgcccgaggccggcccgaccccccggccgccggcgggagaggcagccgccccgggcccccggcccgggaccacgcccgggcggccgggcggcgggcgcgcca
ccccccccccggcgccgcccggggggggggggggggccggcccggtgggggggggggggggcgtgggggggggggggggggcggggggtgggggggcggtgggggtggggccacggggccccgcccccccgcgcggggggggggccgccccccccgcgcggcaccgcgcacgccacaccccgcaaggcgcgcgcggggggcccccccgcccgaggccggcccgaccccccggccgccggcgagagaggcagccgccccgggcccccggcccgggaccacgcccgggcggccgggcggcgggcgcgcca
ccccccccccggcgccgcccggggggggggggggggccggcccggggggggggggggccggcgggggggggggggggggggcggggggggggggggcggcgggggcggggccacccggccccgcccccccgcgcggggggggggccgccccccccgcgcggcaccgcgcacgccacaccccgcaaggcgcgcgcggggggcccccccgcccgaggccggcccgaccccccggccgccggcgggagaggcagccgccccgggcccccggcccgggaccacgcccgggcggccgggcggcgggcgcgcca
ccccccccccgcggcccccccaggggggggggggttggggttttgggggggggggcgcctggtgggggggggcgcggggggcgggttgtggggggtgtgggttttggtggccacggggttccgccccccagctcggggggggggccgccgccccccgcgcgcaccgcgcacgggcaacccagcgagcggcgcgcgggcccggggcccgttggtggttggtcccgggccccggccgccggcggggggggcagcccgcccggcgcccgcgccggcgcaaccgcccggggggcgcggcggggtgcgagccg
ccccccccccgcggccccccgcggggggggggggggggggtttggtggggggggggtggggtggggggggggcggggggggcgggttgtgggttgcgccgtccccgccggccacggggccccgcccccccgcccggggggggggccgccgccccccgcgcgcaccgcgcacgggcaaccccgcgagcggcgcgcgggcccggggcccgttggtggccggccccgggccccggccgccggcgtgttgggcagcccgcccggcgcttgtgccggcgcaaccgcccggcaggcgcggcggggcgcgcgccg
ccccccccccgcggccccacggggggggggggggggggggcccgggggggggggggggggggggggggggggcggttggggcggggggtgtggcgcgccggccccgccggccacggggccccgccccccagcccggggggggggccgccgccccccgcgcgcgccgcgcacgggcagccccgcgggcggcgcgcgggcccggggcccgccggcggccggccccgggccccggccgccggcgcgcagggcagcccgcccggcgcccgcgccggcgcaaccgcccggcgggcgcggcggggcgcgcgccg
ccccccccccgcggccccgggcccccccccccggttggggtttcgtgggtgggggttggtggtttgggggggcgtttggggcgggttgtgtgttgcgctgtccccgtcggccacggggtcccgccccccagctcggggggggggccgccgccccccgcgcgcaccgtgcacgggcaaccccgcgggcggcgcgcgggcccggggcccgccggcggccggccccgggccccggccgccggcgcgaagggcagcccgcccggcgcccgcgccggcgcaaccgcccggcgggcgcggcggggcgcgcgccg
ccccccccccgcggccccgggcccccccccccggggggactttcgggggggggggccgggggggcgggggggcggggggggcgggccgggcgtggcgcggcccccggcggccccggggccccgcccccccgcccggggggccccccgccgccccccgcgcgcaccgcgcacgggcaaccccgcaagcggcgcgcgggcccggggcccgccggcggccggccccgggccccggccgccggcgcgacgagccgcccgcccggcgcccgcgccggcgcaaccacccggcaggcggggcaggacgcgcgccg
ccccccccccgcggccccgggcgggggggcccccggggggtttcggggggggggggggggggggcgggggggcggggggggcggggggtggggggcgcgggccccggcggccacggggccccgccccccagtggggggggggggccgccgccccccgcgcgcaccgcgcacgggcagccccgcgagcggcgcgcgggcccggggcccgccggcggccggccccgggccccggccgccggcgcgcagggcagcccgcccggcgcccgcgccggcgcaaccgcccggcaggcgcggcggggcgcgcgccg
ccccccccccgcggccccgggaccggggggggggttggggtttgttgtgtgggggtttttgtttgttgggggcgtttgtgtcgggttgggttgtgcgcttgccccttcggccacggggccccgccccccattttgggtggggggccgccgccccccgcgcgcaccgcgcacgggcagccccgcgagcggcgcgcgggcccggggcccgttggtggccggccccgggccccggccgccggcgcgcagggcagcccgcccggcgcttgtgccggcgcaaccgcccggcgggcgcggcggggcgcgcgccg
ccccccccccgcggccccgggaccggggggggggggggggtttggtgggggggtggtggtgtggtgggggggcggggggggcggggggtgtggtgcgctggccccgtcggccacccggccccgccccccagcccgggtggggggccgccgccccccgcgcgcaccgcgcacgggcagccttgcgagcggcgcgcgggcccggggcccgttggtggccggccccgggccccggccgccggcgcgacgggcagcccgcccggcgcttgtgccggcgcaaccgcccggcgggcgcggcggggcgcgagccg
ccccccccccgcggccgcggggggggggggggggttccggtttggtgggggggggttggggtgttggggggtcgtttggggcggggggggtggtgcgctggccccgtcggccacggggccccgccccccagctcggggggggggccgccgccccccgcgcgcaccgcgcacgggcagccccgcgggcggcgcgcgggcccggggcccgccggcggccggccccgggccccggccgccggcgcgcagggcagcccgcccggcgcccgcgccggcgcaaccgcccggcgggcgcggcggggcgcgcgccg
ccccccccccgcggccgcggggggggggggggggggccggcccggtgggggggggtgggggtggggggggggcggggggggcggggggggttgtgcgctggccccgtcggccacccggccacgccccccagcgcggggggggggccgccgccccccacgcgcaccgcgcacgggcagccccgcgagcggcgcgcgggcccggggcccgccggcggccggccccgggccacggccgccggcgcgacgggccgcccgcccggcgcccgcgccggcgcaaccgcccggggggcgcggcggggcgcgcgccg
ccccccccccgcggccccggggggggggggggggggggaccccggggggggggggggttgggggggggggggcgggtggggcggggggggtggcgcgccggccccgccggccacggggccccgccccacattttggggggggggccgccgccccccgcgcgcgccgcgcacgggcagccccgcgggcggcgcgcgggcccggggcccgccggcggccggccccgggccccggccgccggcgcgacgggcagcccgcttggtgtttgtgccggcgcaaccgcccggcgggcgcggcggggcgcgcgccg
cccaccccccgcggccccgggggggggggggggggggcggcccgggggggggggggggggggggcgggggggcggggggggcgggggggggggggcgggggccagggcggccgcggggccacgccccgcggcccggggggggggccgccgccccccgcgcgcgccgcgcgcgggcggccacgcgggcggcgcgcgggcccggggcccggggggggccggccccgggccccggccgccggcgcgcagggcggcccgcccggcgcccgcgccggcgcagccgcccggggggcgcggcggggcgcgcgccg
ccccccccccgcggccccgggcccggggggggcgggggggcccggtgggggggggggggggcgtggggggggcggggggggcgggttgcgggtggcgaggtccccggcggccacggggccccgcccccccgcgcggggggggggccgccgccccccgcgcgcaccgcgcacgggcaaccccgcaagcggcgcgcgggcccggggcccgttggtggccggccccgggccccggccgccggcgcgacgggccgcccgcccggcgcccgcgccggcgcaaccgcccggcgggcgcggcggggagcgcgccg
ccccccccccgcggccccggggccggggggggggggccggcccggggggggggggcggggggggggggggggcggggggggcgggggggggggggcgcgggccccggcggccacggggccccgccccccagcgcggggggggggccgccgccccccgcgcgcgccgagcacgggcagccccgcgagcggcgcgcgggcccggggcccgccggcggccggccacgggccccggccgccggcgcgacgggcagcccgcccggcgcccgcgccggcgcaaccgcccggcgggcgcggcggggcgcgcgccg
ccccccccccgcggccccgggaccggggggggggggggactttggtgtgtgggggttttggttgggtgggggcgtgtggggcggggggggtggtgcgctggccccgtcggccacggggccccgccccacattttgggtggggggccgccgccccccgcgcgcgccgcgcacgggcagccccgcgggcggcgcgcgggcccggggcccgttggtggccggccccgggccccggccgctggtgcgcagggcagcccgcccggcgcctgtgccggcgcaaccgcccggcgggcgcggcggggcgcgagccg
ccccccccccgcggccccccgaccggggggggggggggggcccggcgggggggggggggggcggggggggggcggggggggcgggggggggggcgcgccggccccgccggccacggggccccgccccacggcccggggggggggccgccgccccccgcgcgcgccgcgcacgggcagccccgcgggcggcgcgcgggcccggggcccgccggcggccggccccgggccccggccgccggcgcgcagggccgcccgcccggcgcccgcgccggcgcaaccgcccggcgggcgcggcggggcgcgagccg
ccccccccccgcggccgcggggccggggggggggggccggtttggggggggggggggggtggtgggggggggcggccggggcgggggggggggtgcgctggccccgtcggccacggggccacgcccccccgcgcggggggggggccgccgccccccgcgcgcgccgcgcacgggcaacccagcgggcggcgcgcgggcccggggcccgccggcggccggccccgggccccggccgccggcgcgccgggcagcccgcccggcgcccgcgccggcgcaaccgcccggcgggcgcggcggggcgcgcgccg
cccccccccccgggccccgggaccggggggggggggggggtttgggggggggggggggggggggggggggggcggggggggcggggggcgggggggggggggggggggggacgaggggcaacgccccacagcgcggggggggggcagccccccccgaagcccgccgcgccagggcggccccgacggcggcgcgcggggggaccccccgtttggggccggcccggacccacggccgccgcggcgaagggcggccgccccgcggcccgcgccgcggcacacgccaggggggccgcgcggagggcgggccg
cccccccccccggaccgcggggggggggggggggggccggtttgggggggggggggggggggggggggggggcagggggggcggggggggggggggggggggggggggggccccggggccccgccccccccgagggggggggggccgccccccccggcgcccaccgcgcaccggcaaccccgcaagcggcgcgcggggggcccccccgcccgagaccggcccggccccccggccgccgcgacgacgggcagccgccccgcgacccgcgccgcggcacacacccgggcggccgcgccgcaggcgggccg
cccccccccccgggccccgggcccggggggggggggggggcccggggggggggggggggggggggggggggggggggggggcggggggggcgggggggggggggggggggcgccggggccccgccccccagcgcggggggggggccgccccccccaggcggcgaagcgcgcgaccagccccgcggggggcgcgcggggggcccccccgcccagggcccaaccggagccccgcccgccggggcgagggccggcggggccgcggcccgcgccggagcacacgcccgggggggggggagaggcgcgggccg
cccccccccccgggccgcggggggggggggggggggccggcccgcggggggggggcgggggggggggggggggggggggggcggggggggcgggggggggggggggggggcgccggggccccgccccccagcgcggggggggggccgccccccccaggcggcgaagcgcgcgaccagccccgcggggggcgcgcggggggcccccccgcccagggcccaaccggagccccgcccgccggggcgagggccggcggggccgcggcccgcgccggagcacacgcccgggggggggggagaggcgcgggccg
cccccccccccgggcccccctcggggggggggggttggggttttgggggggggggtgtttgggttgggggggcgtggggggcgggggggggtgggggggtgggggtggggccgcggggccttgcccccccttttggggggggggccgcccccccccgagcgcgccgcggggggagggggccgcggcgggcgcgcgggcccggggcccgcccggggcccaacccgggccccgcccgcccgggccaggggccggccgcccgcggccccggcccgggcacacgcccggcgggccgggcggcgggccccggg
cccccccccccgggccccccccggggggggggggttggggttttgtgggggggggttggggggtcgggggggcgtggggggcggggggtggtgggggggtgggggtggggccacggggccccgccccccctctcggggggggggccgtttccccccgagcgcgccgcgcacgaccagccccgcggcgggcgcgcgggtttggggcccgtttggggtttaacccgggccccgcccgcccgggttaggggccggccgcccgcggccccggcccgggcacacgcccggcgggccgggcggcgggccccggg
cccccccccccgggccccgggcccggggggggggttggggttttgtgtgtgggggtttttgggttttgtgggcgtggggggcggggggggggggggggggggggggggggccacggggccccgcccccccttttggggggggggccgcccccccccgcgcgcaccgcgcacgcccaaccccgcaacgggcgcgcgggcccggggcccgtttggggtttaacccgggccccgcccgcccgggccaagggccgaccgcccgcggctttggtttgggcacacgcccggcgggccgggcggcgggccccggg
cccccccccccgggccccgggaccggggggggggttggggttttgtgggggggtgttggttttttttgggggcgttttgggcggggggtggggtggggtgggggggtgggccacggggccccgcccccccgctcggggggggggccgcccccccccgagcgcgccgcgcacgcccagccccgcgacgggcgcgcgggcccggggcccgtttggggcccaacccgggccccgcccgcccgggttaggggccggccgcccgcggcttaggcccgggcacacgcccggcaggccgggcggcgggccccggg
cccccccccccgggccccgggcccggggggggggggggggccctgtgtgtgggggttccggggttgggggggcggttggggcggggggcgggggggggggggggggggggccacggggccccgcccccccgctcggggggggggccgcccccccccgcgcgcaccgcgcacgcccaaccccgcgacgggcgcgcgggcccggggcccgcccgaggcccaacccgggccccgcccgcccgggccaagggccgaccgcccgcgaccccggcccgggcacacgcccggcgggccgggcggcgggccccgga
cccccccccccgggccccgggcccggggggggggttggggccctgtgtgtgggggtttttggggtttgggggcgttgttgtcggggggtggcgggggggcgggggcggggccacggggccccgcccccccttttggggggggggccgcccccccccgagcgcgccgcgcacgaccaaccccgcggcgggcgcgcgggcccggggcccgcccggggcccaacccgggccccgcccgcccgggccaagggccgaccgcccgcggccccggcccgggcacacgcccggcgggccgggcggcgggccccggg
cccccccccccgggccccgggcccggggggggggggggggtttggtgtgtggggggtttgggttggggggggcggggggggcgggggggggggggggggtgggggtggggccacccggccccgcccccccttttggggggccccccgcccccccccgagcgcgccgcgcacgaccagccccgcggcgggcgcgcgggcccggggcccgcccggggcccaacccgggccccgcccgcccgggcccggggccggccgcccgcggccccggcccgggcacacgcccggcgggccgggcggcgggccccggg
cccccccccccgggccccgggaccggggggggggttggggtttgggttgtgggggttttgggttggggggggcggggggggcgggggggggggggggggtgggggtggggccgcccggccccgcccccccttttggggggggggccgcccccccccgagcgcgccgcgcgcgcccagccccgcggcgggcgcgcgggcccggggcccgtttggggcccgacccgggccccgcccgcccgggcccggggccggccgcccgcggcccaggcccgggcacgcgcccggcgggccgggcggcgggccccggg
cccccccccccggaccccgggcccggggggggggggggggcccggggcgcgggggggggggggcggggggggcagggggggcgggggggggggcggggccgggggccgggccacccggccccgcccccccgcccggggggggggccggggccccccgcgcgcaccgcgcacgccacaccccgcaacgggcgcgcgggcccggggcccgcccgaggccaaccccgggccccgcccgcccgggccaagggccgcccgcccgcggccccggcccgggcacacacccggcgggaggggcggggggccccggg
cccccccccccggaccccgggcccggggggggggggggggcccggggggggggggtcgggggggggggggggcatggggggcgggccgggggcgggggggcgggggggggcaccggggccccgcccccccttttgggtggggggccgccgccccccgagcgcaccgcgccagccacaccccgcaacgggcgcgcgggcccggggcccgcccgaagccaaacccgggccccgcccgcccgggccaagggccgaccgcccgcgaccccggcccgggcacacacccggcgggccgggcggcgggccccggg
cccccccccccgggccgcggggggggggggggggggtcggtttggtgggggggggtgggggggtggggggggcggttggggcggggggtggtgggggggtgggggtggggccacggggccccgcccccccactcggggggggggccgcccccccccgagcgcaccgcgcacgaccagccccgcggcgggcgcgcgggcccggggcccgcccggggcccaacccgggccccgcccgcccgggccaggggccggccgcccgcggccccggcccgggcacacgcccggcaggccgggcggagggccacggg
cccccccccccgggccccgggagggggggcccggttggaccaccgggggggggggcggggggtgggggggggcgtttggggcggggggcgggggggggggggggggggggccgcggggccccgccccccagcgcggggggggggccgtttccccccgcgcgcgttgcgcgcgaccagcccagcggcgggcgcgcgggcccggggaccgcccggggcccgacccgggccccgaccgcccgggcaaggggccggttgtttgtggtccaggcccgggcacgcgcccggcgggaagggcggagggccacggg
cccccccccccgggccccgggaccgggggtctggttgggctttcgtgggggggggctttgtgttgttgggggcgtttggggcggggggtgggggggggggggggggggggccacggggccacgcccccccttttggggggggggccgtttccccccgagcgcgccgcgcacgcccagccccgcggcgggcgcgcgggcccggggcccgcccggggtttttcccgggccccgcccgcccgggccaggggccgggggggggggggcccggtttgggcacacgcccggcgggaagggcggagggccacggg
cccccccccccgggccccgggtttggggggggggggggccccctgggggggggggtgtttggggtgggggggcggggggggcggggggtggggtggggtgggggggtgggccacggggccccgcccccccttttggggggggggccgcccccccccgagcgcaccgcgcacgcccaaccccgcgacgggcgcgcgggcccggggcccgcccggggcccaacccgggccccgcccgcccgggccaagggccgaccgcccgcggccccggcccgggcacacgcccggcgggccgggcggcgggccccgga
cccccccccccgggccccgggaggggggggggggttggggttttgggggggggggcgcctgggtcttgtgggcggggggggcggggggtggcgggggggcgggggcggggccacggggccccgcccccccttttggggggggggccgcccccccccgagcgcaccgcgcacggccaaccccgcagcgggcgcgcgggcccggggcccggggggggccccccccgggccccgcccgcccgggcccagggccgaccgcccgcgaccccggcccgggcacacgcccggcgggccgggcggcgggccccggg
cccccccccccgggccccgggaccggggggggggttgcggccccgggggggggggcgttggggtctggtgggcggggggggcggggggtggcgggggggcgggggcggggccacggggccccgcccccccttttggggggggggccgcccccccccgagcgcaccgcgcacgaccaaccccgcaacgggcgcgcgggcccggggcccggggggggcccaccccgggccccgcccgcccgggccaagggccgaccgcccgcgaccccggcccgggcacacgcccggcgggccgggcggcgggccccggg
ccccccccccgcggccccgggcccggggggggggggggggcccgtgggggggggggtgggggggggggggggcggtggggtcgggggggggggggcgcgggccccggcggccacggggggccgccccccccgggggggggggggccggggcccccaagcgccgccgcggacgcccagccccgcgaggggcgcgcgggcccggggcccgccggcggccggcccggcgccccggccgccgcggcgcagggccacggggccggcccccggcccgcggcaaccgcccgggcggggggggggggcgcgggccg
ccccccccccgcggccccgggggggggggccgggggggggggggggggggggggggggggggggggggggggcggggggggcggggggggccggggggggggggggggccccgcggggccccgccccccagcgcggggggggggccgccccccccggggcccggagcgcgcgggcggccccgcggcgggcgcgcggggggcccccccggggggggcccgcccgggcccccggccgccggggcgcgggcccgcggggccgcggcgggggccggggcacgcgcccggcggggggcgcggggggcgggccg
ccccccccccgcggccccgggaccggggggggggggggggcccgggggggggggggggggggggggggggggcggggggggcggggggggccggggggggggggggggccccacggggccccgcccccccgcgcggggggggggccgccccccccggagcccgaagcgcacgggcggccccgcgacgggcgcgcggggggcccccccggggggggcccaaccggacccccggccgccggggcgagggcccgcggggccgcggcgggggccggggcacacgcccggcgggaggcgcggggggcgggccg
cccccccccccgggccgcggggggggggggggggggccggcccgggggggggggggggggggggggggggggcggggggggcgggggggggggggcgcgggccccggcggccacgggggcccgccccacagcccggggggggggccgccgcccccgggcgacgaagcggacgaccagcccagcggggggcgcgcgggcccggggcccgccgggggccggcccggagccccgcccgccgcggcgacgagcggcccgcccggcacccggcccggcgcacacgcccgggagggggggggggacgcgggccg
cccccccccccgggccccgggaccggggggggggggggggtttggtggggggtggttgggtttttggggggtgttgtggggggggttgggggtggcgcggtccccggcggagcaggggggccgccggcccttttggggggggggcgcgggcccccgccgggccggagccggcggaacggacgaggggggggggggggcccggggcccgccgggggccggcccggacgcccgccgcccggcgggtgtggaggacgccccggcgcccggcccgggcgcaccgcccggcgggaggggcggggcgcgggcca
cccccccccccggaccccgggcccggggggggggggggggtttggctggggggggttgggggtggggggggggggggggggggggggggggggggcgcgggccccggcggcacaggggggccgccggcccgcccggggggcccccgcgggcccccgccgggaaggagcccgcgaaacggccgagaggggggggagggcccggggcccgagggggaccggcccggccgcccgccgcccggcggggggggcggccgccccggcgcccggcccgggcgcaccgcccggcaggaggggcaggacgcgagccc
cccccccccccggaccccgggcccggggggggggggggggtttggtgggggggggttggtgtgggggggggggggggggggggggggggggggggcgcgggccccggcggaaccccggggccgccggcccgcccggggggggggcgcgggcccccgccgggacggcgccagcgaacaggccgagaggggggggagggcccggggcccgccggaggccggcccggacgcccgccgcccggcgcgagcggcggccgccccggcgcccggcccgggcgcaccgcccggcgggcggggcgggacgcgggcca
cccccccccccgggccgcggggggggggggggggggccggcccggggggggggggggggggcgcggggggggggggggggggggggggggggcggcgcggcccccggcggaacaggggggccgcaggcccgcccggggggggggcgcgggcccccgacgggacggggacggcgaaacggccgaggggggggggggggcccggggcccgccggaggccggcccggacgcccgccgcccggcgcgagcggcggccgccccggcgcccggcccgggcgcaccgcccggcgggaggggcggggcgcgagcca
cccccccccccggaccgcggggggggggggggggggccggcccggcgggggggggggggcgggggggggggggggggggggggggggggggggggcgcgggccccggcggagcaccggggccgccggcccgcccggggggggggcgcgggcccccgcagggccggagacggcgaaacggaaggggggggggggggggcccggggcccgccgggggccggcccggacgcccgccgcccggcgcgggcggcggccgccccggcgcccggcccgggcgcaccgcccggcgggaggggcggggcgcgggcca
ccccccccccggcgccccgggcccccccccccggggggggccccgttggggggggttggtggtgggggggggcgggtggggcgggttgtgggtggcgcggtccccggcggccacggggggcgcccccacagctcggggggggggcgcggcccccggccgcggcggcgcgggcgagcaggggcagcgggcgcgccggggggcccccccgccgcgggccacgccggacccccggcgcccgcggggttgggcgcgggggccgggggttggtccgcgggcacccgccgggagcgggcccggggccccgcccc
ccccccccccggcgccccgggcccggggggggggggggggcccggtgggggggggttgggggttggggggggcggttggggcgggttgtgggtggcgcggtccccggcggccacccggggcgcccccccagcccggggggggggcgcggcccccggccgcggcgatgtgggcgagcaggggcagcgggcgcgccggggggcccccccgccgcgggccacgccggacccccggcgcccgcggcgacgggcgcgggggccgggagccggcccgcgggcacccgccgggggcaggcccagggccccgcccc
ccccccccccggcgccccgggaccggggggggggggggggcccgggggggggggggtggggtggggggggggcggggggggcgggccgtggggggcgcgggccccggcggccacggggggagcccccccattttggggggggggcgcggcccccggccgcggcggcgcgggcgagcgggggcagcgggcgcgccggggggaccccccgccgcgggccacgccggacccccggcgcccgcgggggggggcgcgggggccgggggccggcccgcgggcacccgccgggggcgggcccggggacccgccca
ccccccccccggcgccgcggggggggggggggggggccggcccgggggggggggggggggggggggggggggcggggggggcgggggggggggggcgggggccccggcggccacccggggcgccccccccgcccggggggggggcgcggcccccggccgcggcggggggggcgcacaggggcagcgggcgcgccggggggcccccccgccgcgggccacgccggccccccggcgcccgcggcgcagggcgcgggggccgggggccggcccgcgggcacccgccgggggcgggcccgggggcccgcccc
cccccccccccgggccccgggcccccccccccggggggggccccgggggggggggtcggtgggggggggggggggttggggcgggggggggggggcgcgggccccggcggcaccggggggcgccccgaaggcccggggggggggagcgggccccagcggaggcggggcgggcgggggggggcagcgggggcgaaggggggcccccccgccggggcccggcccgcacccgccgcgcccggcgcgcagggcgcgggggcccggggcccggcagcgggcgaccaccgggggcgggggaggggcgcgagcgg
cccccccccccgggccccgggaccggggggggggggggggttttgtgggggggggtttttggttgggggggggggttggggcggggggggggtggtgcggtccccggcggcgccggggggcgccccgaagttttggggggggggagcgggccccagcagagacggggagggcgagggggggcagcgggggcgagggggggcccccccgccggggcccagcccgcacccgccgcgcccggcgcgcagggcgcgggggcccggggcccggcggcgggcgaccaccgggggcgggggaggggtgcgggagg
cccccccccccgggccccgggaccggggggggggggggggtttggggggggggggggggggggggggggggggggggggggcgggttgggggcggcgcggcccccggcggcaccggggggcgccccggaggcccggggggccccagcgggcccccgccgcgacggggcgggcgaggaggggcagcgggggcgagggggggcccccccgccagggcccagcccgcacccgccgcgcccggcgagaggggcacgggggcccggggcccggcagcgggcaccccccgggggcgggggcagggcgcgggcgg
cccccccccccgggccgcggggggggggggggggggccggtttggtgggggggggggggggggtgggggggggggggggggcgggttgggggtggcgcgttcccctgcggcaccggggggcgccccgacggcccggggggggggcgcgggccccagcagcggcggggcgggcgagggggggcagcgggggcgagggggggcccccccgccggggcccagcccgcacccgccgcgcccggcgcgcagggcgcgggggcccggggcccggcagcgggcgccccccgggggcgggggaggggcgcgagcgg
ccccccccccaggcccccgggcccggggggggggttggggcccggtggggggggggtgggtgggtggggggggggggggggcgggggggggggggcgctggccccgacggcaccggggggcgccccgggggcccggggggggggcgcgggccccagcagaggcggggcgggcgaggcggggcagcgggggcgagggggggcccccccgttggggtccggcccgcacccgccgcgcccgcggcgagggccgcgcgcccccggggccggcccgggggcgaccaggcggggccggcgaggggcgccgcgag
ccccccccccgggcccgcggggggggggggggggggccggtttggtgggggggggttggggggttgggggggggtttggggcgggggggggggggcgccggccccgacggcaccggggggcgccccgggggtttggggggggggcgcgggccccagcagaggcggggcgggcgagacggggcagcgggggcgagggggggcccccccgccggggcccagcccgcacccgccgcgcccgcggcgagggccgcgcgcccccggggttggtccggggacacccaggcggagacggcgcaggacgccacgag
ccccccccccgggcccccgggcccggggggggggggccggcccggtggggggggggtggggggtgggggggggggtggtggcgggggggggggggcgccggccccgccggcaccggggggcgccccgggggcccggggggttttcgcgggccccagcagaggcggggcgggcgaggcggggcagcgggggcgggggggggcccccccgccggggcccagcccgcacccgccgcgcccgcggtgagggtcgcgcgcccccggggccggcccgggggcgcccaggcggagccggcgcaggacgccacaag
cccccccccccgggccccgggcccggggggggggggggggttttgggggggggggggggggggggggggggggggggggggcgggggggggtgggggggtgggggtggggccacccggggccgcccgggacgccggggggggggcaggggccccccgcgcgcgccgcgccagggcaaccccgacgggggcgcgcggggggcccccccgccgggggcccaaccgacgccccgcccgccgcggcgcggggccgccgccccgggcgttgggccggggcgcacgcggcggggggggcgggcggggcgagccg
cccccccccccgggccccgggaccggggggggggggggggcccggggggggggggggggggggggggggggggggggggggcgggggggggcgggggggcgggggcggggccacggggggacgcccgggactccggggggggggcgggggccccccgcgcgcgccgcgccagggcaacccagacgggggcgcgcggggggcccccccgccaggggcccaaccgacgcccagcccgccgcggcgcggggccgacaccccgggagccgggccggggcacacgcggcggagggggcggacgaggcgggccg
cccccccccccggaccccgggaccggggggggggggggggcccggggcgcgggggggccggggggggggggggggggggggcgggggggggcgggggggcgggggcggggccgcggggggccgcccgggaccccggggggggggcaggggccccccgcgcgcgccgcgccagggcagcccagccgggggcgcgcggggggcccccccgccgggggcccaaccgacgccccgcccgccgcggcgcagggccgccgccccgggcgccgggccggggcgcacgcggcggggggggcgagcggggcgagccg
cccccccccccggaccccgggcccggggggagggggggggtttgcggggggggggggccggggtgtgtgtgggggggggggcggggggtggtgggggggtgggggtggggccacccggggccgcccgagactccggggggggggcaggggccccccacgcgcgccgcgcaaaggaaaccccgccgggggcgcgcggggggcccccccgccagaggcccaaccgaaacccagcccgccgcggcgcagggccgacgccccgggagccgagccggggcacacacggcggaggaggcgaacgaggcgagccg
cccccccccccggaccgcggggggggggggggggggccggtttgcggggggggggggccggggtgtgtgtgtgggggggggcgggggggggtgggggggtgggggtggggccacccggggccgcccgagacgccggggggggggcaggggccccccacgcgcgccgcgccagggcaaccccgccgggggcgcgcggggggcccccccgccaggggcccaaccgccaccccgcccgccgcggcgcagggccgccgccccgggcgccgagccggggcgcacacggcgggggaggcgaacgaggcgagccg
cccccccccccggaccgcgggggggggggggggggggcggtttggtgggggggggggggggggggttggggggggggggggcgggggggggcgggggggcgggggcggggccgcggggggccgcccgggaatccggggggggggcaggggccccccgcgcgagccgcgccagggcagcccagccgggggcgcgcggggggcccccccgccgggggcccaaccgacgccccgcccgccgcggcgcagggccgccgccccgggcgccgagccggggcgcacgcggcggggggggcgggcggggcgagccg
cccccccccccgggccgcgggggggggggggggggggcggtttggggggggggggggggggggggggggggggggggggggcgggggggggcgggggggcgggggcggggccgaccggggaagcccggggcgccggggggggggcgggggccccccacgcgggccgcgccggggcagccacgacgggggcgcgcggggggcccccccgccgggggcccgcccgacgcccggcccgccgcggcgcggggccggggggccgggggccgggccggggcgcgcgcggcggggggggcgggcggggggggccg
cccccccccccgggccccgggcccgggggggggggggcggcccggggtgtgggggggttggggtgggggggggggggggggcggggggcggtgggggggtgggggtggggccacggggggccgcccgagaccccggggggggggcaggggccccccacgcgagccgcgccagggcaaccccgccgggggcgcgcggggggcccccccgccgggggcccaaccgacgccccgcccgccgcggcgcagggccgccgccccgggcgccgagccggggcgcacgcggcgggggaggcgagcggggcgagccg
cccccccccccgggccccgggcccggggggggggggggggcccggtgtgtgggggttttgggggggggggggcggggggggcgggggggggggggcgcgggccccggcggccacggggccccgcccccccttttggggggggggccgcctccccccgggggcgccgcgccagggcagccccgcgaggggcgcgcgggcccggggcccgccggcggcccaaccggagccccggccgcccgggcgcagggcggccgccccggcacccgcgccggggcacacgcccggggggaggcgcggggcgcgcgccg
cccccccccccggaccccgggaccggggggggggggggggcccggggggggggggggggcggggggggggggcggggggggcggggggggggcggcgcggcccccggcggccacccggccccgcccccccacccggggggggggacgcccccccccgggggcgccgcgcaagggcaacccagcagggggcgcgcgagcccgaggcccgccggcggcccaaccggagccccggccgcccgggcgcagggcagccgccccggcccccgcgccggggcacacgcccggggggaggcgcggggcgcgagcca
ccagcgacccggggccccgggcccggggggggggggggggcccggggtggggggggggggggtgggggggggcgtttttggggggggggggtgtgcgctggcagcgtcggggggggggggggggaagggggcgcggggggggggaagggggaggcgggcggggggggagaggggcgggggggagagggggggggggggggggggagggccgagggaggagcacgggggggggcggccgggccggcgcgggggcgcgccgggggcaggcgggggggaagggggaggggcggggggagggacacagcggg
ccagacccccggggccccgggaccggggggggggggggggtttggtgggggggggggggggggggggggggggggttgggggggggggggggggggggggggggagggggggggggggggggggggggcggtttggggggggggccggggggggcgagagagggggaagggggaaggccacgcgagagggggggggggggggggcgggccgcggaaggcgcccgggggggggcggccggggagacgagggggggggaaggcagacggaaaggggaccaggggcgcagggaggggaggggggagggacg
ccggcgacccggagccccgggcccgggggggggaggggggcccgggggggggggggggggggggggggggggcggggggggggggggggggcgggagcgggcgacggcggggggggggggggggcggggggggcggggggggggggggggggggcgccgcgggggggagggggccaggcccgcgggggggggggggggggggggcgggccggaggcggcgcgcgggggggggcggccggggcgcagcgggggggggccggcagggggggggggggacaggggggggggggggggggcgacgcgggccg
ccccccccccggcgccccgggcaaggggggggggggggggtttggggggggggggtgttgtggttggggggggggggggggcggggggggggggggggggggggggggggccgcggggccccgccccccagcgcggcgcgggggccgccgcccccggggcccgccgcgccagggcagccccgcgaggggcgcgcggggggcccccccgccggcggccggccccgggccccggccgccggggcgagcggcggccgccccgcggcccggcccgcggcaaccgcccgggagggggggggcggggcgggccg
ccccccccccggcgccccgggcccggggggggggggggggtttggttggggggggtgccgtggtgggggggggggggggggcggggggggggggggggggggggggggggccacccggccccgccccacagcgcggcgcgggggccgccgcccccggggcccgccgcgccagggcagccccgcggggggcgcgcggggggcccccccgccggcggccggccccgggccccggccgccggggcgagcggcggccgccccgcggcttggtccgcggcaaccgcccgggggggggggggcggggcgagccg
ccccccccccggcgccccggggccggggggggggggggggttttgtgggggggtgtgggtggtttggggggggggttggggcggggggggggtgggggggtgggggggggccacggggccccgcccccccgctctgggggggggccgccgcccccgaagcgcgccgcggacgcccagccccgcgagggacgcgcggggggcccccccgccggcggccggcccggagccccgcccgccggggcgacgggcggccgccccggcccccggcccggcgcacacgcccgcggggcgggccggggggcgcgccg
ccccccccccggcgccccgggcccggggggggggggggggttttgtgggggggggggggggggtgggggggggggggggggcggggggggtgtggggggttggggtggggccacccggccccgcccccccttttggggggggggccgccgcccccgaagcgcgccgcggacgcccaaccccgcgagggacgcgcggggggcccccccgccggcggccggcccggagccccgcccgccggggcgacgggcggccgccccggcacccggcccggcgcacacgcccgaggggcgggcaggggggcgcgccg
ccccccccccggcgccgcggggggggggggggggggccgggggggggggggggggcgggggggggggggggggggggggggcggggggggccgggggggcgggggcggggccacccggccccgcccccccgcccggggggggggccgccgcccccgccgcgcaccgcagacgccacaccccgcaagggacgcgcggggggcccccccgccggcggccggcccggcgccccgcccgccggggcgacgggcagccgccccggcccccggcccggcgcacacgcccgcggggcgggccggggggcgcgcca
ccccccccccggcgccccggggggggggggggggggggccgggcgggggggggggggggggggggggggggggggggggggcggggggggggcgggggggcgggggggggccacggggccccgcccccccgcgcggggggggggccgccgcccccgcagcgcaccgcggacgcccaaccccgcaagggacgcgcggggggcccccccgccggcggccggcccggcgccccgcccgccggggcgacgggcggccgccccggcccccggcccggcgcacacgcccgcggggcgggccaggaggcgcgccg
ccccccacccggcgccccgggaccggggggggggggggggcccggggtgggggggggggggggggggggggggggggggggcgggggggggggggggggggggggggggcggggggggggcagaacccccgcccggggggggggccgcgccccgcgggagcgggggggggggcaggggagggggggggggagggggggggcccccccgaaggaggccggcccggcggcccggcgcccggggcgcggggggggggggccgcgggcaggcccggggcaggcgcccggggggggggcgggggcgccgcggg
ccccccccccggcgccccgggcccggggggggggggggggcccggtgggggggggggggggggtggggggggggggtggggcggggggggggggggggggggggggggacggggccggagccgcccccccgcccggggggggggccgcgacccgcgagagcggggggagaggcagggaagggagagggggcgggggggggcccccccgccggcggccggcccggcggcccgacgcccggggcgcagggggggggggccgcgggccggcccggggcaggcgcccgggaggggggcgggggcgccgcgga
ccccccccccggcgccgcggggggggggggggggggccggcccggggggggggggggggggggggggggggggggggggggcggggggggggggggggggggggggggacggggggggagccgcccccccgcccggggggggggccgcgccccgcgagagcggggggagaggcagggaagggagagggggcgggggggggcccccccgccggcggccggcccggcggcccgacgcccggggcgcagggggggggggccgcgggccggcccggggcaggcgcccgggaggggggcggggccgccgcgga
cccccccccccgggccccgggaccggggggggggggggggcccgggggggggggggtggggggtgggggggggggggggggcggggggggggtgggggggtgggggggggccgcggggccccgcccccccgcgcggggggggggccgccccccccgagggccgaagcgccagggcagccccgcggggggcgcgcgggcccggggcccgccggcggcccgaacggggccccggccgccggggcgccgggccgcccgcccggcacttgtgccgggccacgcgcccgggggggggggcggggcgcgggccg
cccccccccccgggccgcggggggggggggggggggccgggggggggggggggggggggggggggggggggggggggggggcggggggggggggggggggggggggggggccacggggccccgcccccccgcgcggggggggggccgccccccccgggggccgaagcgccagggcagccccgcggggggcgcgcgagcccgaggcccgccggcggcccaaccggcgccccggccgccggggcgcagggccgcccgcccggcccccgcgccgggccacacgcccgggggggggggcggggggcgggccg
cccccccccccggaccgcgggggaggggggggggggccaccccggcggggggggggggggggggggggggggggcggggggcgggggggggggcgaggcgggggggcgggccacggggccccgcccccccacccggggggccccccgccccccccgggggccaaagcgccaggacaaccccgcaaggggcgcgcgggcccggggcccgccagcgacccaaccggcgccccggccgccggggcgaagggccacccgcccggcccccgcgccgggccacacgcccgggcggaggggcaagaagcgggccg
cccccccccccggaccgcccggggggggggggggggccggcccggtgggggggtgggggggggccttggggggggggggggcggggggggggggggggggggggggggggccacggggccccgcccccccctggggggggggggccgccccccccgggggccgaagcgccagggcagccccgcgaggggcgcgcgggcccggggcccgccggcggcccaaccggagccccggccgccggggcgaagggccgcccgcccggcacccgcgccgggccacacgcccggggggaggggcgggacgcgggccg
ccccccccccgggcccgcggggggggggggggggggccggccccggggggggggggggggggggggggggggcggggggggcgggggggggggggcgcgggccccggcccccccgggggcccgcccgcccgcgccggcggggggccgccgccccccgcgcgcgccgcggcagcccaacccggccaggggcgcgcggggggcccccccgccgcgggccggcccggccccgccgccgccggggcgcggggccgaggggccgcgggccgggcccgggcacacgcggcgcggggggcgcggggcgccgcggg
ccccccaccccggaccgcggggggggggggggggggccggcccggggggggggggcgggggggggggggggggggggggggcggggggggggggggggggggggggggggaggaccggaggcggccgggcctgtggggcgggggccggggccccggggcgcgcgggggggggggggggggggaggggggcgcgcgggcccggggcgcgcccggggcccaaccgcccccccggcggccggggcgcaggggggggggggggggggcccggccggggcacgcggggcgcgggaggcccgcggggcagcgga
ccccccccccggcgccccgggattggggggggggggggggcccgggggggggggggggggtgggccggcggggggggggggcggggggggggtgggggggtgggggggggccaaccggcaacgccccacattttggggggggggccgccccccccgcgcggcgccgcgcacgggcagccccgcggggggcgcgcggggggaccccccgccggcggccggccccggcccacgcccgccgcggcgaagagcggcccgcccggcagccggccccgggcacacgcccgggggggggggggcggggccgcccg
cccccccccccgggccccgggaccggggggggggggggggcccgtggggggggggcgggggggtgttggggggggggggggcggggggggggggggggggggggggggggccacggggccacgcccccccgcgcggggggggggccgacacccccgagcggcgccgcgcacgcccagcccagcaaggcgcgcgcggggggcccccccgcccggggccggcccggccccccgcccgccggggcgacgagcagcggggccgcgagccgcgccgcggcacacacccgggcggcggcgcagggggcgcgccg
cccccccccccggaccgcggggggggggggggggggccggcccggggggggggggggggggggggggggggggggggggggcggggggggggggggggggggggggggggccccggggccccgcccccccacccggggggggggccgccccccccgcgcggcaccgcgcacgccacaccccgcaaggcgcgcgcggggggcccccccgcccgagaccggcccggccccccgcccgccggggcgacgagccgcggagccgcgagccgcgccgcggcacacacccgggcggcggcgccggcggcgcgcca
cccccccccccgggcctcgagggggggggcccccttgtggccctgtgggggggggtttttggttcttgtgggcgtttgtggcggggggtggggggggggtgggggtggggccacggggttccgcccccccttttggggggttttcgctttccccccgagcgcaccgcgcacgcccaaccccgcgacgggcgcgcggggggcccccccgtttggggcccaaccggacccccgcccgttctggtttagggccgaccgcccgcggccccggcccggggccacgcccggcaggccgggcggcgggccccggg
cccccccccccgggccccgggaccggggggggggggggggcccggggggggggggtgttggggtggggggggcggggggggcgggttggggtgggcgtgggttttggaggccacggggccccgccccccagctcggggggggggccagggcccccgcgcggcgccgcgccagggcaacccagcgaggggcgcgcggggggcccccccgtttggggccggccccgggccccgcccgccggggcgcagagcggccgccccgcggccaggcccggcgcacacgcccgggcggggggggggggcgccccggg
cccccccccccgggccgcggggggggggggggggggccggcccggggggggggggcgccggggcggggggggcggggggggcgggggggggggggcgcgggccccggcggccacggggccccgcccccccgcgcggggggggggccggggcccccgcgcggcgccgcgccagggcagccccgcggggggcgcgcggggggcccccccgcccgggaccggccccgggccccgcccgccggggcgcggagcggccgccccgcggcccggcccggcgcacacgcccgggcggggggggggggcgccccggg
cccccccccccgggccccgggggggggggcccgggggggccccggggggggggggggccggggcggggggggcggggggggcgggggggggggggcgcgggccacggcggccgcggggccccgccccgcggcccgggggggggggaggggcccccgcgcggcgccgcgccggggcaacccggcggggggcgcgaggggggaccccacgcccggggccggccccgggccacgcccgccggggcgcggggcggccgccccgcggccgggcccggcgcgcgcgccaggggggggggggggggcgcagcggg
cccccccccccgggccccgggaccggggggggggggggggccctttggggggttgttggtgggtcggggggggggggggggcggggggggggggggggggggggggggggccacggggggccgccccgggctttggggggggggcgcgggccccccgcgaggcggggcgggcgaaacggggcagcgggagcgccgggcccgaggcccgccggggccccaaccgcacccgccccgcccggggcgcggggcccgggggccggaagccgggccgggggcggccaccgggaggggggggcgggggccgcgga
cccccccccccgggccgctgggggggggggggggggttggtttttttgggggttgttggggggttgggggttgggtggggtcggggggtggtgggggggtgggggtggggccacggggggccgccccgggctttggggggggggcgcgggccccccgcgcggcggggcgggcggaacggggcagcgggagcgccgggcccggggcccgccggggccccaaccgcacccgccccgcttggggtgtggggcccgggggccggaagccgggccgggggcgaccgccggggggggggggcgggggccgcgga
cccccccccccgggccgcggggggggggggggggggccggcccggtgggggggggggggggggtgggggggggggggggggcggggggtgggggggggggggggggggggccgcccggggacgccccggggcccggggggggggcgcgggcaccccgcgcggcggggcgggcgggacgggggagcgggagcgccgggcccggggcccgccggggccccgaccgaccccgccccgcaaggggcgcagggcccgggggccgggggccgggccgggggcggccgccggggggggggggcgggggccgcggg
ccccccccccggcgccgcggggggggggggggggggccggcccggcgggggggggggggggggggggggggggggggggggggggggggggggggggggggcggcgggcccgccggggggggcccgccccgcccggggggggggcgcgggccccccccgcgacggggccggcggaccgggggcgggggggggggggggggcccccccgcccgaggccggcccgggcgcccggcccccggggcgcggggcggacgccccgcggcgggggccgggggccgcgcccggggggggggggggggggcgggccg
ccccccccccgcggccgcggggggggggggggggggccggcccgggggggggggggggggggggggggggggcggggggggcggggggtgggcggcgcggcccccggcccccacggggggccgcccccccgggcggggggggggccggggccccccgagcgcaccgcgcccgggcggccccgcggggggcgcgcgggcccggggcccgccggcggccggcccgggcccccggccgccggagcgccgcgcggccgccccggcgcccggcccggggcacacgcccggggggggggggggggcgcgcgccg
ccccccccccgcggccgcggggggggggggggggggccggtttggtgtgtgggggtgttggggtggggggggcggggggggcggggggcgggctgtgcggcccccggcccccacccggggccgccccggagggcggggggggggccggggccccccaagcgcaccgcgccagggcggccccgcggggggcgcgcgggcccggggcccgccggcggccggcccggacccccggccgccggcgcgcggagcggccgccccggcacccggcccggggcacacgcccggggggggggggggggcgcgcgcca
ccccccccccggcgccgcggggggggggggggggggttgtcccgggggggggggggtggggcttgggggggggggggggggcgggggggggtgtggggtgggggggtgggttttggggcaccgcccccccgcccggcgcgggggccgaccccccagcggggcacagcgcacgggcaacccagcaaggggcgcgcgggcccggggcccgccggcggccggcaaggagccccggccgccgcggcgacgggaaggccgcccgcggcaaaggcccgggcacacgcccgggagggggcgagcggggcgagccg
cccccccccccgggccccgggaccggggggggggggggggtttggggtggggggggggggggggggggggggcggggggggcgggccgggggcgggggggcgggggggggccacggggccacgcccccccgcccggggggggggccgccccccccgcggggcgaagcgccagggcagcccagcggggggcgcgcggggggcccccccgcccgggacccacaaggagccccggccgccgcggcgccgagcggcccgcccggcacccggccccgggcacacgcccgggaggagggggggggggcgggccg
ccccccccccgcggccccgggcccggggggggggggggggaccggggggggggggggccggggggggggggggggggggggcggggggggggggggggggggggggggggccgcggggccccgcccccccgccccgcgcgggggccgccccccccgcgcggcgccgcgcccggccagcccggccgggggcgcgcggggggcccccccggggggggccggcccgccgccccgcccgccggggcgcggggcggccgccccggcgcccggcccggggcccccgcccggggggggggggggcgggcgggccg
cccccacccccgggccccgggaccgggggggggggggcggcccggcgggggggggggggggggggggggggggggcggcggcggggggggggggggggggggggggggggcaccggggccccgccccgcgcgggggggggcccccgccccccccccggaggcaccgcgcgcgcccaaccccgcaaggggcgcgcggggggcccccccgcccagggcccaaccgcacccccgcccgccgcgggggggggcggccgccccgcggcccgcggagggggccacgcccgggggggggggggcggcgcgggccg
cccccccccccgggccccgggcccgggggggggggggcggtttggggggggggggggggggggggggggggggggtggtggcggggggggggggggggggggggggggggccccggggccccgcccccccgcccggggggcccccgccccccccagcagcgacggggagggcgagacggggcaacggggcgcgcggggggcccccccgcccgggaccggcccgcacccccgcccgccggggcgacgagccgcggggccgcgggccgcgccgcgggccacacggcggagccggcgcaggaggcgcgccg
ccccccccccgcggcgggggggggggggggggggggggggtttggtgggggggggggggggggtggggggggcgtttggggcggggggtgggggggggggggggggggggccacttggcaccgccccggaggcctgggggggggccgccccccccgaggcgcgccgcgccagcccagacccgacggggccgcgcggggggcccccccgttggtggccggcccgcagccccgcccgcccgggcgaagagcagccgccccgcggcttgtgccggggcacaccaccgggggggggggacgggggccccccg
ccccgccccccgggcgggggggggggggggggggggggggtttggggggggggggggggggggggggggggggggggggggtgggccgcgggtgtggggttggggtggcacgccgggggcaagcccgggggcccggggggggggcgccacccccccgcgcgacggagcgggcgaaacggggcagcgggggcgagggggggcccccccgttggggtccagcccgcattcccggcgcccggggagagggtcgcgggggcccggagccggcccccgggcgaccaggcaggggggggcagggggcccgccga
;
END; [Characters]

BEGIN Distances;
DIMENSIONS ntax=112;
FORMAT labels=left diagonal triangle=both;
MATRIX
[1] 'CC1-IV'                   0.0 0.064935066 0.06818182 0.13311689 0.1396104 0.12987013 0.1590909 0.31493506 0.30194804 0.25974026 0.29220778 0.32792208 0.26948053 0.2792208 0.28246754 0.26298702 0.2792208 0.27597404 0.26623377 0.2792208 0.26298702 0.28896105 0.2792208 0.26623377 0.20779221 0.21428572 0.19805194 0.21428572 0.23376623 0.23701298 0.26298702 0.24675325 0.22727273 0.22727273 0.22077923 0.22727273 0.28246754 0.26948053 0.19480519 0.3051948 0.27272728 0.23376623 0.23701298 0.24350649 0.26623377 0.23376623 0.22402598 0.26623377 0.33116883 0.36038962 0.32792208 0.34415585 0.34415585 0.41883117 0.37987012 0.37337664 0.37662336 0.37987012 0.35064936 0.38311687 0.36363637 0.39935064 0.37662336 0.4025974 0.24350649 0.26623377 0.26623377 0.27597404 0.2792208 0.25974026 0.28246754 0.2564935 0.23376623 0.26948053 0.4707792 0.38636363 0.41883117 0.19155844 0.19805194 0.14610389 0.1525974 0.21103896 0.2012987 0.31493506 0.3116883 0.32792208 0.24350649 0.23376623 0.29545453 0.25 0.2987013 0.35714287 0.20779221 0.18831168 0.21103896 0.2792208 0.24350649 0.23376623 0.2857143 0.36688313 0.37662336 0.3961039 0.3051948 0.26948053 0.28246754 0.2792208 0.20454545 0.18506494 0.23376623 0.27272728 0.22402598 0.3961039
[2] 'CC1-IV-PVL'               0.064935066 0.0 0.06818182 0.09415584 0.10714286 0.11038961 0.12012987 0.31493506 0.2792208 0.24025974 0.2987013 0.31493506 0.26623377 0.32142857 0.26948053 0.2792208 0.25 0.2792208 0.24675325 0.24025974 0.23701298 0.3116883 0.24675325 0.26298702 0.20454545 0.22077923 0.17857143 0.2012987 0.27597404 0.25 0.2987013 0.25974026 0.21753247 0.24350649 0.23051947 0.24675325 0.24350649 0.26623377 0.21103896 0.28246754 0.29220778 0.24350649 0.26623377 0.24675325 0.24350649 0.22727273 0.19480519 0.24025974 0.3538961 0.36688313 0.3181818 0.32792208 0.32142857 0.4025974 0.3474026 0.37337664 0.3474026 0.37012988 0.37337664 0.37012988 0.35714287 0.37662336 0.40584415 0.39285713 0.23051947 0.24675325 0.24025974 0.26948053 0.27597404 0.26623377 0.2792208 0.24025974 0.23701298 0.22727273 0.44805196 0.39935064 0.39935064 0.19480519 0.18831168 0.14935064 0.1525974 0.18831168 0.17532468 0.29545453 0.27597404 0.30844155 0.20779221 0.22077923 0.2792208 0.24350649 0.27272728 0.3474026 0.18181819 0.1590909 0.19155844 0.30194804 0.23051947 0.21428572 0.26623377 0.37987012 0.4090909 0.37012988 0.2857143 0.24025974 0.27272728 0.26623377 0.19155844 0.16558442 0.22077923 0.2792208 0.22727273 0.38636363
[3] 'CC1-IV-SCCfus'            0.06818182 0.06818182 0.0 0.084415585 0.103896104 0.07467532 0.103896104 0.28896105 0.26623377 0.25 0.30844155 0.32142857 0.26298702 0.3051948 0.2792208 0.28896105 0.26623377 0.2792208 0.2564935 0.23701298 0.23701298 0.30194804 0.24025974 0.2564935 0.21428572 0.20454545 0.18506494 0.20454545 0.2564935 0.24350649 0.26623377 0.25324675 0.21753247 0.23376623 0.21753247 0.23701298 0.25 0.25324675 0.22727273 0.30194804 0.2857143 0.22402598 0.25 0.23051947 0.24025974 0.23376623 0.2012987 0.24675325 0.3538961 0.3538961 0.3116883 0.32792208 0.33441558 0.39935064 0.36363637 0.35714287 0.3538961 0.37987012 0.37012988 0.37987012 0.36688313 0.37987012 0.39935064 0.38961038 0.25 0.25 0.2564935 0.2792208 0.2857143 0.26948053 0.2987013 0.24350649 0.22077923 0.24675325 0.4642857 0.40584415 0.4090909 0.19805194 0.20454545 0.16233766 0.15584415 0.19805194 0.17532468 0.3051948 0.29545453 0.3051948 0.21753247 0.22402598 0.26948053 0.21753247 0.26623377 0.3538961 0.20779221 0.16233766 0.18181819 0.26948053 0.23051947 0.21753247 0.26298702 0.35714287 0.39935064 0.37662336 0.28896105 0.25 0.28896105 0.23701298 0.20779221 0.17207792 0.21428572 0.2857143 0.24025974 0.3961039
[4] 'CC1-IV-SCCfus-PVL'        0.13311689 0.09415584 0.084415585 0.0 0.103896104 0.11363637 0.10064935 0.30194804 0.28246754 0.2564935 0.3409091 0.32467532 0.26623377 0.3538961 0.28246754 0.3051948 0.25 0.28896105 0.24350649 0.25 0.24025974 0.33116883 0.24350649 0.27272728 0.19805194 0.22077923 0.19480519 0.21428572 0.30844155 0.29220778 0.3181818 0.30194804 0.24350649 0.2857143 0.27272728 0.2792208 0.23701298 0.27597404 0.2564935 0.3051948 0.33441558 0.26298702 0.28896105 0.26298702 0.26623377 0.24350649 0.21753247 0.24350649 0.38961038 0.36688313 0.32142857 0.32792208 0.32467532 0.42532468 0.38636363 0.37987012 0.3538961 0.38961038 0.41558442 0.38311687 0.38636363 0.39285713 0.42857143 0.40584415 0.25 0.24350649 0.25324675 0.2792208 0.28896105 0.2792208 0.26948053 0.25324675 0.2564935 0.25 0.4642857 0.41558442 0.39285713 0.20779221 0.20454545 0.2012987 0.18831168 0.18506494 0.18181819 0.3116883 0.29545453 0.3116883 0.24350649 0.23701298 0.28246754 0.25 0.2792208 0.35064936 0.19805194 0.17532468 0.18831168 0.33116883 0.24675325 0.23701298 0.27272728 0.39285713 0.44155845 0.37337664 0.29220778 0.25974026 0.28246754 0.2564935 0.21428572 0.19155844 0.22727273 0.29220778 0.2564935 0.3961039
[5] 'CC1-V-PVL'                0.1396104 0.10714286 0.103896104 0.103896104 0.0 0.032467533 0.022727273 0.30844155 0.29220778 0.26623377 0.3474026 0.33116883 0.27272728 0.36363637 0.30194804 0.28246754 0.24350649 0.29545453 0.25974026 0.25324675 0.24025974 0.3538961 0.28246754 0.26623377 0.23376623 0.17532468 0.21428572 0.2012987 0.2987013 0.2857143 0.30844155 0.3051948 0.23051947 0.2857143 0.26623377 0.2792208 0.22077923 0.25974026 0.23051947 0.31493506 0.34415585 0.25 0.26298702 0.24350649 0.26948053 0.24025974 0.22402598 0.24350649 0.38636363 0.36038962 0.31493506 0.30194804 0.30194804 0.42532468 0.37662336 0.37662336 0.30194804 0.4025974 0.42207792 0.38311687 0.36038962 0.40584415 0.40584415 0.39935064 0.2564935 0.26298702 0.25974026 0.28896105 0.26623377 0.25974026 0.26623377 0.25 0.27272728 0.24350649 0.49025974 0.42532468 0.42857143 0.21753247 0.22402598 0.20779221 0.19480519 0.12662338 0.16883117 0.31493506 0.29545453 0.2792208 0.24350649 0.20779221 0.24675325 0.23701298 0.25 0.33116883 0.22402598 0.17207792 0.12987013 0.30844155 0.2564935 0.21103896 0.27272728 0.39285713 0.41233766 0.3409091 0.25324675 0.23701298 0.25974026 0.23701298 0.23701298 0.18831168 0.22077923 0.2857143 0.24675325 0.38311687
[6] 'CC1-V-SCCfus'             0.12987013 0.11038961 0.07467532 0.11363637 0.032467533 0.0 0.032467533 0.30194804 0.27272728 0.25974026 0.34415585 0.33766234 0.27597404 0.3538961 0.30844155 0.2792208 0.25324675 0.30194804 0.26623377 0.25 0.24675325 0.35064936 0.26623377 0.27272728 0.24350649 0.18181819 0.22077923 0.20779221 0.2857143 0.26298702 0.30844155 0.2987013 0.23376623 0.28896105 0.27272728 0.29220778 0.24675325 0.26623377 0.22077923 0.32467532 0.3409091 0.25324675 0.27272728 0.25324675 0.27597404 0.24675325 0.23051947 0.25 0.38636363 0.36688313 0.32467532 0.30194804 0.3181818 0.42532468 0.38636363 0.37987012 0.32142857 0.4090909 0.42207792 0.38636363 0.3538961 0.40584415 0.40584415 0.39935064 0.26948053 0.27597404 0.27272728 0.2987013 0.2792208 0.26623377 0.29220778 0.25324675 0.27272728 0.26298702 0.49675325 0.42207792 0.43506494 0.22402598 0.23701298 0.20779221 0.2012987 0.1525974 0.17532468 0.32142857 0.30844155 0.2857143 0.25 0.21428572 0.25 0.22402598 0.2564935 0.35064936 0.24350649 0.17857143 0.13636364 0.29545453 0.26298702 0.21753247 0.2792208 0.39285713 0.39935064 0.35064936 0.2564935 0.24025974 0.27597404 0.23701298 0.24350649 0.19480519 0.22727273 0.29220778 0.25 0.38311687
[7] 'CC1-V-SCCfus-PVL'         0.1590909 0.12012987 0.103896104 0.10064935 0.022727273 0.032467533 0.0 0.29545453 0.28896105 0.26948053 0.36688313 0.3409091 0.2857143 0.37012988 0.3116883 0.29545453 0.25 0.2987013 0.26948053 0.26948053 0.25 0.3538961 0.27272728 0.27597404 0.25 0.18506494 0.22402598 0.21103896 0.29545453 0.29220778 0.3181818 0.32142857 0.24025974 0.29220778 0.27597404 0.28896105 0.23376623 0.26948053 0.25 0.33116883 0.35714287 0.2564935 0.26948053 0.2564935 0.2792208 0.25 0.23376623 0.25324675 0.39935064 0.37012988 0.32142857 0.30844155 0.3116883 0.4383117 0.3961039 0.38636363 0.3116883 0.41233766 0.4318182 0.39285713 0.37662336 0.41558442 0.42207792 0.41558442 0.26623377 0.27272728 0.2564935 0.29545453 0.26948053 0.26948053 0.27597404 0.26623377 0.27597404 0.25324675 0.5 0.43506494 0.4383117 0.22727273 0.22727273 0.22402598 0.21103896 0.13636364 0.17857143 0.32467532 0.3116883 0.28896105 0.25974026 0.21753247 0.2564935 0.23701298 0.25974026 0.3409091 0.23376623 0.18831168 0.1396104 0.3181818 0.26623377 0.21103896 0.27272728 0.4090909 0.42857143 0.36038962 0.26298702 0.25 0.27597404 0.24675325 0.24675325 0.18506494 0.23051947 0.29545453 0.26623377 0.39935064
[8] 'ST228-I'                  0.31493506 0.31493506 0.28896105 0.30194804 0.30844155 0.30194804 0.29545453 0.0 0.14285715 0.1590909 0.17857143 0.22402598 0.15584415 0.18831168 0.16558442 0.17207792 0.18831168 0.2012987 0.18181819 0.15584415 0.1590909 0.19155844 0.16558442 0.16233766 0.2792208 0.28246754 0.29545453 0.2987013 0.27272728 0.24350649 0.26298702 0.26948053 0.26623377 0.29220778 0.29220778 0.26623377 0.29545453 0.3051948 0.26623377 0.2857143 0.29545453 0.26948053 0.24025974 0.26948053 0.26948053 0.2857143 0.28246754 0.25 0.3538961 0.33441558 0.32792208 0.34415585 0.34415585 0.43506494 0.42207792 0.4025974 0.40584415 0.4512987 0.4318182 0.4025974 0.41558442 0.44805196 0.4642857 0.48051947 0.3116883 0.32792208 0.3116883 0.35064936 0.3474026 0.32142857 0.3474026 0.32792208 0.24675325 0.24675325 0.47402596 0.44155845 0.42857143 0.2564935 0.26298702 0.26298702 0.2792208 0.2792208 0.26623377 0.3961039 0.41233766 0.4025974 0.25974026 0.24675325 0.2987013 0.26623377 0.3181818 0.41883117 0.3116883 0.30194804 0.32142857 0.35714287 0.24675325 0.2792208 0.3051948 0.40584415 0.42207792 0.39285713 0.36363637 0.23376623 0.25974026 0.30194804 0.2857143 0.26948053 0.33441558 0.38636363 0.30844155 0.45454547
[9] 'ST5-I-Geraldine'          0.30194804 0.2792208 0.26623377 0.28246754 0.29220778 0.27272728 0.28896105 0.14285715 0.0 0.097402595 0.1396104 0.1590909 0.10714286 0.1396104 0.08766234 0.12012987 0.12987013 0.13311689 0.14935064 0.08766234 0.12337662 0.13636364 0.103896104 0.12012987 0.2792208 0.26623377 0.28896105 0.30194804 0.29545453 0.25324675 0.26623377 0.24025974 0.25324675 0.29545453 0.27272728 0.27597404 0.24675325 0.2792208 0.24675325 0.32142857 0.33116883 0.25974026 0.26623377 0.2792208 0.22077923 0.26623377 0.26298702 0.21428572 0.30194804 0.29220778 0.27272728 0.29545453 0.3116883 0.38311687 0.37662336 0.38636363 0.37987012 0.42857143 0.42532468 0.37012988 0.36688313 0.4090909 0.4090909 0.41558442 0.3051948 0.33116883 0.33441558 0.3538961 0.36038962 0.32142857 0.3409091 0.33116883 0.20454545 0.21753247 0.45454547 0.4383117 0.4025974 0.25 0.25324675 0.25 0.24675325 0.26298702 0.24350649 0.38636363 0.38311687 0.38311687 0.21103896 0.23701298 0.26948053 0.24675325 0.28246754 0.41558442 0.2987013 0.2987013 0.2987013 0.37012988 0.25974026 0.25324675 0.28246754 0.41233766 0.41883117 0.38311687 0.3409091 0.18831168 0.22727273 0.26623377 0.26298702 0.26623377 0.33441558 0.36038962 0.27597404 0.43506494
[10] 'CC5-Ivar'                 0.25974026 0.24025974 0.25 0.2564935 0.26623377 0.25974026 0.26948053 0.1590909 0.097402595 0.0 0.13311689 0.16883117 0.08116883 0.1590909 0.11363637 0.077922076 0.08766234 0.071428575 0.09090909 0.11038961 0.064935066 0.12987013 0.045454547 0.08116883 0.25 0.25324675 0.23051947 0.23701298 0.27272728 0.26298702 0.29545453 0.26623377 0.22402598 0.25974026 0.2564935 0.26298702 0.21428572 0.26623377 0.22077923 0.2564935 0.30194804 0.23051947 0.25 0.25324675 0.17532468 0.22402598 0.23051947 0.16233766 0.32467532 0.30844155 0.28246754 0.25974026 0.26948053 0.40584415 0.36363637 0.36038962 0.33441558 0.37012988 0.40584415 0.37337664 0.36363637 0.3961039 0.4025974 0.3961039 0.28896105 0.2857143 0.27272728 0.32792208 0.32142857 0.28246754 0.30194804 0.2792208 0.16558442 0.16883117 0.40584415 0.41233766 0.3538961 0.22727273 0.23701298 0.22727273 0.24350649 0.23376623 0.22402598 0.34415585 0.3409091 0.33441558 0.19155844 0.18181819 0.23051947 0.2012987 0.24025974 0.36038962 0.25 0.2564935 0.26623377 0.36363637 0.24350649 0.2012987 0.23376623 0.38636363 0.4090909 0.33766234 0.30194804 0.14285715 0.20454545 0.2564935 0.25 0.22727273 0.30194804 0.3409091 0.25974026 0.4448052
[11] 'CC5-II-Rhine-Hesse'       0.29220778 0.2987013 0.30844155 0.3409091 0.3474026 0.34415585 0.36688313 0.17857143 0.1396104 0.13311689 0.0 0.13636364 0.12662338 0.13311689 0.1396104 0.09415584 0.1590909 0.17857143 0.19805194 0.1396104 0.14610389 0.14935064 0.15584415 0.12662338 0.31493506 0.32142857 0.3116883 0.33441558 0.3051948 0.29220778 0.27272728 0.25 0.24675325 0.26948053 0.28896105 0.2857143 0.28896105 0.30194804 0.27272728 0.29545453 0.29545453 0.27272728 0.28246754 0.28896105 0.25324675 0.30844155 0.31493506 0.26298702 0.3051948 0.33766234 0.3051948 0.3409091 0.35714287 0.3538961 0.37337664 0.42207792 0.42857143 0.37662336 0.4090909 0.40584415 0.40584415 0.4318182 0.4318182 0.45454547 0.3474026 0.37012988 0.36038962 0.37987012 0.3961039 0.36363637 0.38961038 0.3474026 0.22402598 0.24675325 0.46103895 0.46103895 0.43506494 0.27597404 0.2792208 0.23701298 0.26623377 0.3116883 0.28896105 0.4318182 0.41233766 0.4383117 0.2564935 0.2792208 0.32142857 0.2987013 0.33116883 0.45454547 0.32142857 0.33116883 0.35714287 0.36363637 0.2987013 0.30194804 0.31493506 0.42207792 0.4448052 0.42207792 0.3961039 0.23376623 0.24675325 0.3181818 0.3116883 0.31493506 0.37337664 0.3961039 0.32467532 0.49675325
[12] 'CC5-II-ACME'              0.32792208 0.31493506 0.32142857 0.32467532 0.33116883 0.33766234 0.3409091 0.22402598 0.1590909 0.16883117 0.13636364 0.0 0.12337662 0.23701298 0.17857143 0.18181819 0.17857143 0.18831168 0.18831168 0.1396104 0.1396104 0.20779221 0.16233766 0.1590909 0.30844155 0.26948053 0.29545453 0.31493506 0.32792208 0.32142857 0.3051948 0.3181818 0.27597404 0.32142857 0.2792208 0.30844155 0.26948053 0.26298702 0.28896105 0.30844155 0.33441558 0.2857143 0.29220778 0.2857143 0.24350649 0.29220778 0.28896105 0.23376623 0.3474026 0.2857143 0.29545453 0.32467532 0.3474026 0.39285713 0.4090909 0.42207792 0.41558442 0.37987012 0.44805196 0.36038962 0.41233766 0.44805196 0.44805196 0.4318182 0.33441558 0.33766234 0.35064936 0.35714287 0.37337664 0.35714287 0.37012988 0.3538961 0.23051947 0.23051947 0.48051947 0.46103895 0.42207792 0.26623377 0.28896105 0.26623377 0.26623377 0.27597404 0.23376623 0.41883117 0.4090909 0.41233766 0.24675325 0.26623377 0.25324675 0.2792208 0.30194804 0.4448052 0.31493506 0.2857143 0.29220778 0.4025974 0.2987013 0.2792208 0.29545453 0.42532468 0.46753246 0.42207792 0.38311687 0.22077923 0.26623377 0.3116883 0.26948053 0.29220778 0.32467532 0.30844155 0.34415585 0.47727272
[13] 'CC5-III'                  0.26948053 0.26623377 0.26298702 0.26623377 0.27272728 0.27597404 0.2857143 0.15584415 0.10714286 0.08116883 0.12662338 0.12337662 0.0 0.16883117 0.12012987 0.103896104 0.11363637 0.12012987 0.11363637 0.10714286 0.08116883 0.14610389 0.10064935 0.10064935 0.25 0.23376623 0.25 0.26298702 0.26623377 0.26298702 0.26623377 0.27272728 0.23701298 0.26948053 0.24675325 0.2564935 0.24350649 0.26298702 0.22727273 0.25974026 0.28896105 0.23376623 0.22727273 0.24025974 0.17857143 0.22727273 0.24675325 0.18506494 0.3181818 0.29220778 0.27597404 0.2857143 0.29545453 0.39285713 0.39285713 0.36688313 0.35714287 0.37337664 0.4025974 0.37337664 0.36688313 0.41558442 0.40584415 0.42532468 0.2857143 0.2987013 0.2987013 0.31493506 0.32792208 0.2857143 0.30844155 0.30194804 0.16883117 0.19480519 0.4383117 0.41233766 0.36363637 0.20779221 0.23376623 0.23376623 0.23051947 0.24350649 0.21753247 0.37012988 0.35714287 0.35064936 0.21103896 0.19480519 0.26298702 0.20779221 0.25 0.37012988 0.2564935 0.26623377 0.2792208 0.33441558 0.2564935 0.22077923 0.24350649 0.37662336 0.4025974 0.36038962 0.32792208 0.15584415 0.2012987 0.27597404 0.25 0.24675325 0.30194804 0.33766234 0.2792208 0.44805196
[14] 'CC5-IV-Paediat'           0.2792208 0.32142857 0.3051948 0.3538961 0.36363637 0.3538961 0.37012988 0.18831168 0.1396104 0.1590909 0.13311689 0.23701298 0.16883117 0.0 0.116883114 0.11363637 0.16558442 0.1525974 0.21103896 0.16233766 0.16883117 0.07467532 0.16883117 0.1525974 0.32467532 0.33441558 0.33766234 0.3538961 0.2857143 0.28896105 0.22727273 0.23051947 0.26948053 0.24025974 0.25324675 0.23051947 0.30194804 0.3051948 0.27597404 0.3409091 0.29220778 0.27597404 0.2564935 0.26623377 0.24675325 0.3181818 0.30844155 0.2857143 0.32142857 0.3538961 0.32792208 0.37337664 0.38311687 0.44805196 0.42532468 0.41883117 0.4512987 0.45454547 0.40584415 0.4383117 0.42207792 0.45454547 0.4383117 0.47727272 0.33766234 0.37012988 0.35064936 0.37012988 0.37662336 0.3474026 0.38961038 0.33441558 0.2012987 0.27272728 0.45779222 0.46103895 0.4448052 0.28896105 0.2857143 0.27597404 0.27597404 0.32467532 0.32467532 0.4318182 0.4318182 0.45454547 0.26623377 0.2987013 0.34415585 0.29545453 0.35064936 0.45779222 0.33441558 0.32467532 0.37662336 0.3409091 0.27272728 0.30844155 0.34415585 0.42207792 0.43506494 0.44805196 0.41233766 0.26298702 0.25324675 0.32467532 0.32142857 0.3181818 0.37662336 0.41883117 0.31493506 0.512987
[15] 'CC5-IV-PVL'               0.28246754 0.26948053 0.2792208 0.28246754 0.30194804 0.30844155 0.3116883 0.16558442 0.08766234 0.11363637 0.1396104 0.17857143 0.12012987 0.116883114 0.0 0.10714286 0.103896104 0.13311689 0.1525974 0.116883114 0.11038961 0.10064935 0.11038961 0.10714286 0.26298702 0.2792208 0.27597404 0.2987013 0.30844155 0.28246754 0.25974026 0.22077923 0.25324675 0.28896105 0.26298702 0.25974026 0.24675325 0.29220778 0.2564935 0.3116883 0.3181818 0.25 0.27272728 0.27597404 0.22402598 0.26623377 0.25 0.21428572 0.32142857 0.30194804 0.2564935 0.30844155 0.30194804 0.41233766 0.37662336 0.37662336 0.37662336 0.4090909 0.41558442 0.37987012 0.38961038 0.38961038 0.4090909 0.42207792 0.28896105 0.32792208 0.31493506 0.34415585 0.3538961 0.3181818 0.33116883 0.32792208 0.20779221 0.2012987 0.43506494 0.42207792 0.39935064 0.24675325 0.22727273 0.23701298 0.24350649 0.25974026 0.26298702 0.37337664 0.37012988 0.39285713 0.21428572 0.24675325 0.28896105 0.2564935 0.29220778 0.40584415 0.2857143 0.28896105 0.31493506 0.39935064 0.26948053 0.26948053 0.29220778 0.38961038 0.42207792 0.37337664 0.3474026 0.20454545 0.22727273 0.26948053 0.26948053 0.26298702 0.33441558 0.36038962 0.27272728 0.45779222
[16] 'CC5-V'                    0.26298702 0.2792208 0.28896105 0.3051948 0.28246754 0.2792208 0.29545453 0.17207792 0.12012987 0.077922076 0.09415584 0.18181819 0.103896104 0.11363637 0.10714286 0.0 0.077922076 0.12337662 0.12987013 0.13636364 0.09415584 0.11038961 0.10714286 0.077922076 0.2792208 0.25324675 0.27597404 0.25974026 0.26623377 0.25324675 0.25974026 0.22727273 0.23051947 0.26298702 0.25974026 0.25324675 0.26298702 0.2857143 0.20779221 0.2792208 0.28896105 0.25 0.24675325 0.26298702 0.21428572 0.25974026 0.27597404 0.19155844 0.29220778 0.31493506 0.28246754 0.2792208 0.29220778 0.4318182 0.38961038 0.39285713 0.36038962 0.40584415 0.39935064 0.39935064 0.35714287 0.40584415 0.36688313 0.41558442 0.3181818 0.33441558 0.32142857 0.35714287 0.3181818 0.29220778 0.3181818 0.3181818 0.18831168 0.21753247 0.43506494 0.42857143 0.39935064 0.23376623 0.24350649 0.22402598 0.25324675 0.24350649 0.25324675 0.39285713 0.37662336 0.36363637 0.22402598 0.19805194 0.2564935 0.22402598 0.26623377 0.37987012 0.28896105 0.29220778 0.28896105 0.3538961 0.27272728 0.22077923 0.2792208 0.3961039 0.38636363 0.35714287 0.32467532 0.16883117 0.18506494 0.25974026 0.2792208 0.27272728 0.33116883 0.36038962 0.26948053 0.46753246
[17] 'CC5-V-PVL'                0.2792208 0.25 0.26623377 0.25 0.24350649 0.25324675 0.25 0.18831168 0.12987013 0.08766234 0.1590909 0.17857143 0.11363637 0.16558442 0.103896104 0.077922076 0.0 0.116883114 0.11363637 0.11038961 0.06818182 0.14935064 0.097402595 0.084415585 0.2564935 0.24350649 0.25 0.23376623 0.29220778 0.2857143 0.2987013 0.27597404 0.24350649 0.2857143 0.26948053 0.27597404 0.23051947 0.27597404 0.22402598 0.29220778 0.33116883 0.23701298 0.2792208 0.26298702 0.19480519 0.25 0.24350649 0.16558442 0.33766234 0.3181818 0.26948053 0.25974026 0.26298702 0.42207792 0.37012988 0.37012988 0.32792208 0.39935064 0.42532468 0.38961038 0.36038962 0.39935064 0.3961039 0.4025974 0.2987013 0.3051948 0.30194804 0.3409091 0.30844155 0.29220778 0.28896105 0.29545453 0.17857143 0.19480519 0.4090909 0.42207792 0.37012988 0.23376623 0.23051947 0.23376623 0.23051947 0.20454545 0.22402598 0.37662336 0.35064936 0.33766234 0.20454545 0.18831168 0.23051947 0.19805194 0.24025974 0.3538961 0.24675325 0.25324675 0.25 0.38636363 0.25324675 0.2012987 0.2564935 0.38961038 0.40584415 0.32142857 0.30194804 0.14610389 0.17207792 0.23376623 0.26948053 0.2564935 0.3051948 0.35064936 0.2857143 0.45454547
[18] 'CC5-VI-NewPaed'           0.27597404 0.2792208 0.2792208 0.28896105 0.29545453 0.30194804 0.2987013 0.2012987 0.13311689 0.071428575 0.17857143 0.18831168 0.12012987 0.1525974 0.13311689 0.12337662 0.116883114 0.0 0.13311689 0.14285715 0.09415584 0.103896104 0.09415584 0.12012987 0.2792208 0.26948053 0.25974026 0.26623377 0.27272728 0.29545453 0.27597404 0.28896105 0.25324675 0.26623377 0.25324675 0.25974026 0.24675325 0.27272728 0.25324675 0.25974026 0.28896105 0.22077923 0.26298702 0.25324675 0.21103896 0.25 0.25 0.18506494 0.33441558 0.34415585 0.31493506 0.29220778 0.3051948 0.41558442 0.39935064 0.37012988 0.37012988 0.40584415 0.4025974 0.3961039 0.39285713 0.41883117 0.39935064 0.42532468 0.2987013 0.3051948 0.29545453 0.3474026 0.33766234 0.3051948 0.32467532 0.29545453 0.17207792 0.21103896 0.42857143 0.41233766 0.37662336 0.24025974 0.23701298 0.2564935 0.24675325 0.26298702 0.24025974 0.37337664 0.37662336 0.37012988 0.20779221 0.22402598 0.25324675 0.23376623 0.26948053 0.36688313 0.25 0.2792208 0.28896105 0.37662336 0.25974026 0.22727273 0.25 0.39285713 0.42857143 0.37662336 0.33116883 0.17857143 0.22402598 0.27272728 0.2857143 0.25974026 0.32467532 0.37337664 0.28246754 0.4707792
[19] 'ST5-VIISCC-JCSC6082'      0.26623377 0.24675325 0.2564935 0.24350649 0.25974026 0.26623377 0.26948053 0.18181819 0.14935064 0.09090909 0.19805194 0.18831168 0.11363637 0.21103896 0.1525974 0.12987013 0.11363637 0.13311689 0.0 0.12662338 0.09090909 0.17207792 0.09415584 0.11363637 0.21428572 0.24350649 0.21753247 0.21753247 0.2564935 0.26623377 0.2857143 0.2857143 0.24025974 0.26948053 0.2564935 0.24350649 0.23376623 0.25974026 0.23376623 0.26298702 0.31493506 0.24350649 0.23701298 0.23376623 0.2012987 0.19805194 0.21428572 0.16233766 0.32792208 0.30844155 0.29545453 0.26298702 0.26298702 0.41558442 0.38311687 0.36038962 0.3181818 0.36038962 0.3961039 0.36038962 0.33441558 0.36688313 0.4025974 0.38311687 0.27597404 0.26623377 0.25324675 0.33116883 0.3051948 0.2564935 0.2564935 0.26623377 0.17532468 0.18831168 0.4025974 0.37987012 0.32792208 0.21753247 0.23376623 0.23376623 0.24675325 0.23051947 0.22077923 0.3051948 0.32467532 0.3051948 0.18181819 0.17207792 0.24025974 0.19480519 0.24350649 0.3181818 0.23376623 0.24675325 0.25 0.37012988 0.23376623 0.19805194 0.21428572 0.35064936 0.38961038 0.29545453 0.27597404 0.14610389 0.20454545 0.26298702 0.23051947 0.19480519 0.26948053 0.32142857 0.26623377 0.39935064
[20] 'CC5-IVvar-Maltes'         0.2792208 0.24025974 0.23701298 0.25 0.25324675 0.25 0.26948053 0.15584415 0.08766234 0.11038961 0.1396104 0.1396104 0.10714286 0.16233766 0.116883114 0.13636364 0.11038961 0.14285715 0.12662338 0.0 0.08116883 0.1590909 0.09415584 0.11363637 0.24350649 0.25 0.24350649 0.26948053 0.28896105 0.26298702 0.24675325 0.25974026 0.20454545 0.25974026 0.25 0.25324675 0.21103896 0.23051947 0.23701298 0.2857143 0.30844155 0.23701298 0.24675325 0.22402598 0.19155844 0.25 0.22077923 0.19805194 0.2987013 0.2987013 0.26948053 0.26948053 0.29545453 0.38961038 0.34415585 0.36363637 0.35714287 0.4025974 0.4090909 0.36363637 0.36363637 0.38961038 0.43506494 0.4090909 0.29545453 0.29545453 0.29220778 0.33441558 0.34415585 0.3116883 0.33116883 0.2792208 0.17532468 0.18181819 0.4318182 0.41883117 0.37337664 0.23051947 0.23376623 0.21753247 0.21428572 0.24025974 0.21103896 0.35714287 0.35064936 0.37012988 0.18181819 0.21103896 0.24350649 0.22077923 0.25324675 0.38636363 0.26298702 0.24025974 0.25974026 0.35714287 0.22402598 0.23051947 0.26623377 0.37662336 0.42532468 0.3538961 0.32467532 0.16558442 0.22077923 0.2564935 0.25 0.23051947 0.28896105 0.33116883 0.28246754 0.42857143
[21] 'CC5-SCCMRSAZH47'          0.26298702 0.23701298 0.23701298 0.24025974 0.24025974 0.24675325 0.25 0.1590909 0.12337662 0.064935066 0.14610389 0.1396104 0.08116883 0.16883117 0.11038961 0.09415584 0.06818182 0.09415584 0.09090909 0.08116883 0.0 0.1396104 0.06818182 0.064935066 0.23376623 0.22402598 0.21103896 0.21103896 0.27272728 0.26948053 0.26948053 0.26623377 0.21428572 0.25324675 0.24350649 0.24675325 0.21428572 0.24025974 0.22077923 0.2564935 0.29545453 0.22727273 0.25324675 0.22402598 0.16233766 0.22402598 0.20454545 0.14285715 0.30844155 0.28246754 0.25324675 0.24025974 0.25324675 0.39285713 0.3538961 0.34415585 0.32142857 0.36688313 0.39935064 0.35064936 0.35064936 0.37987012 0.3961039 0.37987012 0.2792208 0.27597404 0.26623377 0.32792208 0.31493506 0.28246754 0.2987013 0.26948053 0.14610389 0.16233766 0.38961038 0.38961038 0.33441558 0.2012987 0.21103896 0.20779221 0.22077923 0.20454545 0.20454545 0.33116883 0.33116883 0.3181818 0.17207792 0.16883117 0.22727273 0.18506494 0.21753247 0.33766234 0.24025974 0.21753247 0.24025974 0.37337664 0.22402598 0.17857143 0.23701298 0.36363637 0.40584415 0.33116883 0.28896105 0.12987013 0.19155844 0.24025974 0.23051947 0.21753247 0.27272728 0.31493506 0.2792208 0.4383117
[22] 'CC5-IV-VI'                0.28896105 0.3116883 0.30194804 0.33116883 0.3538961 0.35064936 0.3538961 0.19155844 0.13636364 0.12987013 0.14935064 0.20779221 0.14610389 0.07467532 0.10064935 0.11038961 0.14935064 0.103896104 0.17207792 0.1590909 0.1396104 0.0 0.12012987 0.12662338 0.27597404 0.3051948 0.29545453 0.31493506 0.29220778 0.28896105 0.24025974 0.24350649 0.2564935 0.2564935 0.23376623 0.22402598 0.2857143 0.2857143 0.26948053 0.30194804 0.27272728 0.24675325 0.26623377 0.27597404 0.23051947 0.28246754 0.2792208 0.23701298 0.3051948 0.32467532 0.3051948 0.33766234 0.35064936 0.4318182 0.41558442 0.38961038 0.41558442 0.42532468 0.38636363 0.41558442 0.41233766 0.42857143 0.41558442 0.45454547 0.31493506 0.33441558 0.3116883 0.3538961 0.36038962 0.31493506 0.3538961 0.30844155 0.16883117 0.23051947 0.4383117 0.4318182 0.40584415 0.25974026 0.24675325 0.26298702 0.26298702 0.30844155 0.28896105 0.38961038 0.4025974 0.41883117 0.23701298 0.2564935 0.30194804 0.26948053 0.31493506 0.41558442 0.28896105 0.3116883 0.35064936 0.36688313 0.26623377 0.27272728 0.29545453 0.4025974 0.43506494 0.41233766 0.37662336 0.23051947 0.22727273 0.3051948 0.2857143 0.27597404 0.35064936 0.39935064 0.29220778 0.4935065
[23] 'CC5-IV-SCCfus'            0.2792208 0.24675325 0.24025974 0.24350649 0.28246754 0.26623377 0.27272728 0.16558442 0.103896104 0.045454547 0.15584415 0.16233766 0.10064935 0.16883117 0.11038961 0.10714286 0.097402595 0.09415584 0.09415584 0.09415584 0.06818182 0.12012987 0.0 0.08766234 0.23701298 0.26298702 0.22727273 0.25 0.27272728 0.26623377 0.28246754 0.26623377 0.22727273 0.25974026 0.24350649 0.25 0.20454545 0.2564935 0.23701298 0.26948053 0.2987013 0.23376623 0.2564935 0.24675325 0.16883117 0.23376623 0.21753247 0.16558442 0.3116883 0.28896105 0.26623377 0.2564935 0.26948053 0.4025974 0.37337664 0.3538961 0.3409091 0.36038962 0.39285713 0.35714287 0.3538961 0.37662336 0.4090909 0.37987012 0.27272728 0.26948053 0.25324675 0.31493506 0.3181818 0.2792208 0.2987013 0.26298702 0.15584415 0.15584415 0.4025974 0.4025974 0.33766234 0.22727273 0.21753247 0.23376623 0.24025974 0.25 0.23376623 0.33116883 0.33441558 0.3409091 0.17532468 0.18506494 0.22402598 0.19805194 0.24350649 0.36363637 0.24025974 0.25 0.27272728 0.38636363 0.23701298 0.21103896 0.23376623 0.36038962 0.41558442 0.33766234 0.30194804 0.1590909 0.21428572 0.2564935 0.23701298 0.21753247 0.2792208 0.33766234 0.28896105 0.44805196
[24] 'CC5-ST835'                0.26623377 0.26298702 0.2564935 0.27272728 0.26623377 0.27272728 0.27597404 0.16233766 0.12012987 0.08116883 0.12662338 0.1590909 0.10064935 0.1525974 0.10714286 0.077922076 0.084415585 0.12012987 0.11363637 0.11363637 0.064935066 0.12662338 0.08766234 0.0 0.24675325 0.23051947 0.25 0.25 0.2792208 0.2857143 0.2792208 0.25 0.24350649 0.27272728 0.24350649 0.25 0.23701298 0.27597404 0.22402598 0.2792208 0.29545453 0.23701298 0.25324675 0.26298702 0.19155844 0.24675325 0.24350649 0.16883117 0.3116883 0.29545453 0.26623377 0.26623377 0.26623377 0.41233766 0.37987012 0.37662336 0.33766234 0.38961038 0.3961039 0.36363637 0.35714287 0.40584415 0.3961039 0.40584415 0.2857143 0.28896105 0.29220778 0.33441558 0.31493506 0.28246754 0.29545453 0.29545453 0.18181819 0.17207792 0.39935064 0.4090909 0.36688313 0.23051947 0.23376623 0.21103896 0.23376623 0.22727273 0.22727273 0.35714287 0.36038962 0.34415585 0.19805194 0.17857143 0.24350649 0.21753247 0.23376623 0.36038962 0.27272728 0.25 0.26623377 0.38311687 0.25324675 0.20454545 0.2564935 0.38961038 0.41233766 0.3474026 0.30194804 0.14935064 0.19480519 0.24025974 0.23051947 0.23701298 0.2987013 0.32467532 0.2857143 0.44155845
[25] 'ST6-IV-WA51'              0.20779221 0.20454545 0.21428572 0.19805194 0.23376623 0.24350649 0.25 0.2792208 0.2792208 0.25 0.31493506 0.30844155 0.25 0.32467532 0.26298702 0.2792208 0.2564935 0.2792208 0.21428572 0.24350649 0.23376623 0.27597404 0.23701298 0.24675325 0.0 0.16233766 0.18831168 0.21103896 0.27597404 0.26948053 0.2857143 0.27597404 0.26623377 0.29220778 0.26623377 0.24675325 0.2792208 0.27597404 0.25 0.29220778 0.3116883 0.27272728 0.26623377 0.26948053 0.26623377 0.18181819 0.16883117 0.24675325 0.35714287 0.34415585 0.32142857 0.32792208 0.33441558 0.3961039 0.36688313 0.33441558 0.33441558 0.37012988 0.36688313 0.3474026 0.35064936 0.3474026 0.39935064 0.38636363 0.20454545 0.21103896 0.20454545 0.24350649 0.24350649 0.21428572 0.22077923 0.20779221 0.23051947 0.23376623 0.42857143 0.37662336 0.37662336 0.17207792 0.17857143 0.20779221 0.21428572 0.24350649 0.21428572 0.2857143 0.2987013 0.2987013 0.2012987 0.19805194 0.27597404 0.23701298 0.25974026 0.32792208 0.2012987 0.18506494 0.21753247 0.3409091 0.22402598 0.23376623 0.23701298 0.38636363 0.41883117 0.3538961 0.28896105 0.24350649 0.25974026 0.27597404 0.17857143 0.18506494 0.23051947 0.24025974 0.19805194 0.36038962
[26] 'ST6-V'                    0.21428572 0.22077923 0.20454545 0.22077923 0.17532468 0.18181819 0.18506494 0.28246754 0.26623377 0.25324675 0.32142857 0.26948053 0.23376623 0.33441558 0.2792208 0.25324675 0.24350649 0.26948053 0.24350649 0.25 0.22402598 0.3051948 0.26298702 0.23051947 0.16233766 0.0 0.21428572 0.2012987 0.2857143 0.28896105 0.28246754 0.3051948 0.25 0.29545453 0.26948053 0.2792208 0.24675325 0.24025974 0.22727273 0.3181818 0.33441558 0.2564935 0.25324675 0.2564935 0.2564935 0.20779221 0.2012987 0.22727273 0.38636363 0.34415585 0.32467532 0.32792208 0.33441558 0.42857143 0.38311687 0.37662336 0.31493506 0.41233766 0.40584415 0.36688313 0.36038962 0.3961039 0.37337664 0.3961039 0.23376623 0.23376623 0.24350649 0.24675325 0.22077923 0.22077923 0.24350649 0.25 0.24350649 0.23701298 0.48701298 0.41558442 0.41558442 0.19480519 0.22077923 0.21753247 0.20779221 0.18506494 0.17857143 0.33116883 0.33766234 0.2987013 0.23376623 0.18831168 0.21103896 0.19480519 0.23701298 0.33766234 0.24675325 0.17207792 0.11363637 0.33116883 0.26623377 0.21753247 0.27597404 0.38311687 0.38961038 0.34415585 0.26298702 0.23376623 0.27597404 0.24675325 0.2012987 0.21753247 0.21428572 0.22077923 0.23376623 0.37337664
[27] 'CC7-IV'                   0.19805194 0.17857143 0.18506494 0.19480519 0.21428572 0.22077923 0.22402598 0.29545453 0.28896105 0.23051947 0.3116883 0.29545453 0.25 0.33766234 0.27597404 0.27597404 0.25 0.25974026 0.21753247 0.24350649 0.21103896 0.29545453 0.22727273 0.25 0.18831168 0.21428572 0.0 0.025974026 0.26298702 0.25974026 0.28246754 0.27272728 0.22402598 0.24675325 0.23051947 0.24675325 0.23376623 0.24350649 0.22402598 0.24350649 0.28896105 0.23376623 0.27597404 0.25 0.21753247 0.14935064 0.12337662 0.17857143 0.35714287 0.34415585 0.3181818 0.30844155 0.30844155 0.37987012 0.34415585 0.33116883 0.3181818 0.33766234 0.36038962 0.33766234 0.34415585 0.35064936 0.4090909 0.38311687 0.20779221 0.20454545 0.19480519 0.25974026 0.26298702 0.22402598 0.23701298 0.20779221 0.19480519 0.20454545 0.3961039 0.35714287 0.33441558 0.17532468 0.18506494 0.19805194 0.19155844 0.21753247 0.19480519 0.23376623 0.25 0.25324675 0.1590909 0.15584415 0.21753247 0.18181819 0.22727273 0.2987013 0.2012987 0.14935064 0.17207792 0.33441558 0.20454545 0.18506494 0.21753247 0.32467532 0.38311687 0.32142857 0.2564935 0.24025974 0.29220778 0.25 0.16233766 0.14935064 0.14285715 0.23701298 0.23051947 0.3474026
[28] 'CC7-V'                    0.21428572 0.2012987 0.20454545 0.21428572 0.2012987 0.20779221 0.21103896 0.2987013 0.30194804 0.23701298 0.33441558 0.31493506 0.26298702 0.3538961 0.2987013 0.25974026 0.23376623 0.26623377 0.21753247 0.26948053 0.21103896 0.31493506 0.25 0.25 0.21103896 0.2012987 0.025974026 0.0 0.27272728 0.26948053 0.3051948 0.29220778 0.24675325 0.26948053 0.2564935 0.26623377 0.25974026 0.26623377 0.21103896 0.24675325 0.3051948 0.24675325 0.2792208 0.25974026 0.24025974 0.15584415 0.14610389 0.16558442 0.37662336 0.36688313 0.3409091 0.29545453 0.29545453 0.4025974 0.36688313 0.3538961 0.3051948 0.36038962 0.37987012 0.36038962 0.33116883 0.37662336 0.39285713 0.3961039 0.23376623 0.22727273 0.21753247 0.2792208 0.24350649 0.21753247 0.23051947 0.22727273 0.21753247 0.22727273 0.42207792 0.37987012 0.36038962 0.19155844 0.20779221 0.21428572 0.21753247 0.19805194 0.2012987 0.2564935 0.27597404 0.24025974 0.18181819 0.14285715 0.20779221 0.16883117 0.21428572 0.2792208 0.21753247 0.16233766 0.1590909 0.33116883 0.22402598 0.16558442 0.22402598 0.3409091 0.37012988 0.30844155 0.24350649 0.22727273 0.27597404 0.24350649 0.18506494 0.17532468 0.1590909 0.2564935 0.23051947 0.3474026
[29] 'ST250-I-Early'            0.23376623 0.27597404 0.2564935 0.30844155 0.2987013 0.2857143 0.29545453 0.27272728 0.29545453 0.27272728 0.3051948 0.32792208 0.26623377 0.2857143 0.30844155 0.26623377 0.29220778 0.27272728 0.2564935 0.28896105 0.27272728 0.29220778 0.27272728 0.2792208 0.27597404 0.2857143 0.26298702 0.27272728 0.0 0.116883114 0.14935064 0.16558442 0.15584415 0.12337662 0.12012987 0.11363637 0.20454545 0.16883117 0.12337662 0.21103896 0.19480519 0.12987013 0.12662338 0.14285715 0.32792208 0.26623377 0.25974026 0.29545453 0.37337664 0.39285713 0.36038962 0.37012988 0.37337664 0.4642857 0.43506494 0.4025974 0.4025974 0.44155845 0.38961038 0.42207792 0.39935064 0.42207792 0.42207792 0.45779222 0.2857143 0.30844155 0.3051948 0.32792208 0.32467532 0.30194804 0.3116883 0.2987013 0.23701298 0.2857143 0.4642857 0.41883117 0.4318182 0.25324675 0.28246754 0.26623377 0.2564935 0.30194804 0.29220778 0.3409091 0.35714287 0.3538961 0.25324675 0.24025974 0.3051948 0.24675325 0.3116883 0.3116883 0.28896105 0.2987013 0.30844155 0.24675325 0.2857143 0.27272728 0.30844155 0.32467532 0.32792208 0.33441558 0.3538961 0.29545453 0.3116883 0.31493506 0.27597404 0.2857143 0.32467532 0.32467532 0.30194804 0.40584415
[30] 'ST247-I-North'            0.23701298 0.25 0.24350649 0.29220778 0.2857143 0.26298702 0.29220778 0.24350649 0.25324675 0.26298702 0.29220778 0.32142857 0.26298702 0.28896105 0.28246754 0.25324675 0.2857143 0.29545453 0.26623377 0.26298702 0.26948053 0.28896105 0.26623377 0.2857143 0.26948053 0.28896105 0.25974026 0.26948053 0.116883114 0.0 0.13636364 0.12662338 0.1525974 0.1396104 0.13311689 0.12987013 0.2012987 0.19155844 0.11038961 0.19805194 0.16883117 0.16233766 0.1396104 0.14935064 0.3181818 0.27272728 0.25324675 0.28896105 0.3961039 0.3961039 0.37662336 0.3961039 0.39935064 0.48051947 0.44805196 0.43506494 0.42532468 0.47727272 0.4448052 0.45454547 0.42857143 0.43506494 0.45454547 0.47402596 0.2792208 0.30844155 0.30844155 0.32467532 0.32467532 0.2987013 0.32142857 0.2987013 0.25324675 0.29545453 0.48376623 0.44155845 0.44805196 0.26948053 0.27597404 0.2564935 0.25 0.29545453 0.2792208 0.37337664 0.37337664 0.37987012 0.26298702 0.25 0.31493506 0.2564935 0.30844155 0.37662336 0.29220778 0.28246754 0.3051948 0.19805194 0.26948053 0.26948053 0.31493506 0.36038962 0.3474026 0.36363637 0.37662336 0.29220778 0.32142857 0.30844155 0.28246754 0.28246754 0.32467532 0.36363637 0.27272728 0.42207792
[31] 'CC8-IV-UK14'              0.26298702 0.2987013 0.26623377 0.3181818 0.30844155 0.30844155 0.3181818 0.26298702 0.26623377 0.29545453 0.27272728 0.3051948 0.26623377 0.22727273 0.25974026 0.25974026 0.2987013 0.27597404 0.2857143 0.24675325 0.26948053 0.24025974 0.28246754 0.2792208 0.2857143 0.28246754 0.28246754 0.3051948 0.14935064 0.13636364 0.0 0.116883114 0.11038961 0.097402595 0.12987013 0.116883114 0.18506494 0.1590909 0.16558442 0.25 0.1525974 0.12337662 0.11363637 0.11363637 0.31493506 0.30194804 0.26623377 0.31493506 0.38961038 0.39935064 0.37012988 0.41883117 0.42532468 0.48051947 0.4642857 0.4512987 0.4448052 0.49025974 0.43506494 0.47402596 0.47727272 0.45779222 0.4642857 0.5064935 0.2987013 0.32467532 0.32142857 0.33766234 0.35064936 0.3181818 0.36688313 0.3051948 0.21753247 0.28246754 0.49675325 0.4448052 0.45779222 0.27597404 0.2792208 0.25974026 0.2564935 0.3051948 0.2857143 0.38636363 0.38636363 0.4025974 0.2564935 0.26623377 0.30194804 0.25974026 0.32142857 0.39285713 0.2987013 0.27597404 0.3051948 0.21103896 0.26948053 0.3051948 0.3409091 0.3538961 0.38961038 0.38636363 0.39935064 0.32142857 0.32467532 0.3116883 0.29545453 0.29220778 0.3051948 0.36688313 0.28246754 0.4707792
[32] 'CC8-IV-Lyon'              0.24675325 0.25974026 0.25324675 0.30194804 0.3051948 0.2987013 0.32142857 0.26948053 0.24025974 0.26623377 0.25 0.3181818 0.27272728 0.23051947 0.22077923 0.22727273 0.27597404 0.28896105 0.2857143 0.25974026 0.26623377 0.24350649 0.26623377 0.25 0.27597404 0.3051948 0.27272728 0.29220778 0.16558442 0.12662338 0.116883114 0.0 0.12987013 0.12662338 0.1525974 0.12987013 0.20454545 0.19805194 0.12987013 0.20454545 0.16883117 0.13636364 0.14935064 0.15584415 0.31493506 0.28896105 0.24675325 0.30194804 0.37987012 0.38961038 0.37012988 0.41558442 0.41883117 0.45779222 0.4448052 0.4448052 0.4512987 0.48051947 0.44155845 0.4707792 0.47402596 0.43506494 0.44155845 0.47402596 0.30844155 0.32792208 0.33441558 0.3538961 0.37012988 0.32792208 0.36363637 0.3409091 0.25974026 0.28896105 0.4642857 0.44155845 0.4707792 0.26948053 0.27272728 0.22402598 0.27597404 0.32142857 0.29545453 0.37662336 0.37012988 0.38961038 0.24350649 0.25974026 0.3051948 0.25974026 0.32467532 0.4025974 0.3051948 0.26948053 0.3181818 0.21103896 0.2792208 0.2987013 0.34415585 0.3474026 0.37337664 0.37987012 0.4025974 0.31493506 0.33766234 0.2792208 0.2792208 0.29545453 0.3181818 0.36038962 0.26623377 0.45779222
[33] 'CC8-IV-UK-6'              0.22727273 0.21753247 0.21753247 0.24350649 0.23051947 0.23376623 0.24025974 0.26623377 0.25324675 0.22402598 0.24675325 0.27597404 0.23701298 0.26948053 0.25324675 0.23051947 0.24350649 0.25324675 0.24025974 0.20454545 0.21428572 0.2564935 0.22727273 0.24350649 0.26623377 0.25 0.22402598 0.24675325 0.15584415 0.1525974 0.11038961 0.12987013 0.0 0.08766234 0.11038961 0.13311689 0.12337662 0.116883114 0.10714286 0.19155844 0.18831168 0.08116883 0.12662338 0.10714286 0.25974026 0.26948053 0.22402598 0.2564935 0.37012988 0.37012988 0.33116883 0.3538961 0.37012988 0.43506494 0.38636363 0.4090909 0.38961038 0.4318182 0.42207792 0.44155845 0.4448052 0.4318182 0.4512987 0.44805196 0.28246754 0.27597404 0.26298702 0.2987013 0.32142857 0.3051948 0.3409091 0.25324675 0.17857143 0.22727273 0.45454547 0.42207792 0.41233766 0.24675325 0.25 0.21428572 0.23376623 0.2564935 0.24350649 0.33766234 0.3181818 0.3409091 0.20454545 0.21428572 0.25324675 0.22077923 0.26948053 0.3409091 0.25974026 0.23376623 0.24025974 0.22077923 0.24350649 0.24350649 0.28246754 0.30844155 0.3474026 0.32792208 0.34415585 0.26623377 0.2792208 0.26623377 0.24675325 0.24675325 0.26623377 0.33116883 0.26948053 0.42857143
[34] 'CC8-IV-USA500'            0.22727273 0.24350649 0.23376623 0.2857143 0.2857143 0.28896105 0.29220778 0.29220778 0.29545453 0.25974026 0.26948053 0.32142857 0.26948053 0.24025974 0.28896105 0.26298702 0.2857143 0.26623377 0.26948053 0.25974026 0.25324675 0.2564935 0.25974026 0.27272728 0.29220778 0.29545453 0.24675325 0.26948053 0.12337662 0.1396104 0.097402595 0.12662338 0.08766234 0.0 0.103896104 0.12012987 0.16558442 0.14285715 0.12987013 0.20779221 0.16558442 0.09090909 0.10064935 0.084415585 0.2857143 0.28896105 0.24675325 0.2857143 0.3961039 0.41558442 0.37662336 0.4025974 0.39935064 0.4707792 0.44155845 0.42857143 0.42857143 0.4642857 0.4318182 0.47727272 0.47402596 0.44805196 0.47402596 0.47727272 0.2987013 0.28246754 0.2792208 0.32467532 0.34415585 0.29545453 0.34415585 0.27597404 0.19480519 0.25974026 0.4707792 0.45454547 0.4448052 0.28246754 0.29220778 0.25974026 0.2564935 0.29545453 0.28896105 0.37337664 0.37662336 0.38636363 0.24675325 0.24675325 0.29220778 0.24025974 0.30844155 0.36038962 0.27272728 0.26948053 0.2987013 0.19155844 0.27272728 0.2792208 0.3181818 0.3409091 0.36688313 0.36688313 0.38311687 0.29220778 0.32467532 0.3116883 0.2792208 0.2792208 0.29545453 0.3538961 0.30194804 0.47402596
[35] 'ST8-IV-PVLACME-USA300'    0.22077923 0.23051947 0.21753247 0.27272728 0.26623377 0.27272728 0.27597404 0.29220778 0.27272728 0.2564935 0.28896105 0.2792208 0.24675325 0.25324675 0.26298702 0.25974026 0.26948053 0.25324675 0.2564935 0.25 0.24350649 0.23376623 0.24350649 0.24350649 0.26623377 0.26948053 0.23051947 0.2564935 0.12012987 0.13311689 0.12987013 0.1525974 0.11038961 0.103896104 0.0 0.06168831 0.1525974 0.15584415 0.10064935 0.21428572 0.16558442 0.12337662 0.13311689 0.12662338 0.28246754 0.26298702 0.23701298 0.27272728 0.37012988 0.3538961 0.3474026 0.38636363 0.37337664 0.47402596 0.42532468 0.41233766 0.4025974 0.46753246 0.40584415 0.41883117 0.42207792 0.4512987 0.45779222 0.45454547 0.25324675 0.28246754 0.27597404 0.28896105 0.2987013 0.2857143 0.2987013 0.25974026 0.18506494 0.24025974 0.47402596 0.42532468 0.4318182 0.25324675 0.24350649 0.24675325 0.21103896 0.28246754 0.27597404 0.3474026 0.33766234 0.36688313 0.22077923 0.22077923 0.26623377 0.24350649 0.2987013 0.33116883 0.2564935 0.26623377 0.29220778 0.23051947 0.26623377 0.2564935 0.2987013 0.33441558 0.35714287 0.33766234 0.36688313 0.2792208 0.27272728 0.29220778 0.24025974 0.25324675 0.26298702 0.3116883 0.2792208 0.43506494
[36] 'ST8-IV-PVL-USA300'        0.22727273 0.24675325 0.23701298 0.2792208 0.2792208 0.29220778 0.28896105 0.26623377 0.27597404 0.26298702 0.2857143 0.30844155 0.2564935 0.23051947 0.25974026 0.25324675 0.27597404 0.25974026 0.24350649 0.25324675 0.24675325 0.22402598 0.25 0.25 0.24675325 0.2792208 0.24675325 0.26623377 0.11363637 0.12987013 0.116883114 0.12987013 0.13311689 0.12012987 0.06168831 0.0 0.17532468 0.16558442 0.12662338 0.18831168 0.16883117 0.13636364 0.12337662 0.12337662 0.28896105 0.24675325 0.24350649 0.2857143 0.36363637 0.36688313 0.3538961 0.38311687 0.37337664 0.47402596 0.4318182 0.41233766 0.40584415 0.46753246 0.40584415 0.44155845 0.42857143 0.43506494 0.45454547 0.47402596 0.26948053 0.29220778 0.2792208 0.30844155 0.3116883 0.2987013 0.29220778 0.27597404 0.2012987 0.25324675 0.48051947 0.42857143 0.43506494 0.24675325 0.24350649 0.25324675 0.22727273 0.2857143 0.28246754 0.32467532 0.3409091 0.36038962 0.21103896 0.23376623 0.30844155 0.26298702 0.2987013 0.33116883 0.26298702 0.26948053 0.2987013 0.23051947 0.24675325 0.26298702 0.29545453 0.33441558 0.36038962 0.33441558 0.36688313 0.2857143 0.2792208 0.29545453 0.25324675 0.24675325 0.29545453 0.34415585 0.27597404 0.42207792
[37] 'CC8-IV-PVL-sed'           0.28246754 0.24350649 0.25 0.23701298 0.22077923 0.24675325 0.23376623 0.29545453 0.24675325 0.21428572 0.28896105 0.26948053 0.24350649 0.30194804 0.24675325 0.26298702 0.23051947 0.24675325 0.23376623 0.21103896 0.21428572 0.2857143 0.20454545 0.23701298 0.2792208 0.24675325 0.23376623 0.25974026 0.20454545 0.2012987 0.18506494 0.20454545 0.12337662 0.16558442 0.1525974 0.17532468 0.0 0.116883114 0.16233766 0.22402598 0.23701298 0.14285715 0.17532468 0.14610389 0.2564935 0.26948053 0.22727273 0.25324675 0.38961038 0.35064936 0.3051948 0.32467532 0.32792208 0.4512987 0.39285713 0.40584415 0.35064936 0.42857143 0.4448052 0.4090909 0.41558442 0.41558442 0.46103895 0.42532468 0.2564935 0.25974026 0.23701298 0.27272728 0.28896105 0.2792208 0.29545453 0.25324675 0.22402598 0.21428572 0.4448052 0.42532468 0.40584415 0.26298702 0.25974026 0.25974026 0.23701298 0.21753247 0.24025974 0.32792208 0.3116883 0.33441558 0.23051947 0.22727273 0.23051947 0.23376623 0.26623377 0.31493506 0.25974026 0.23051947 0.22077923 0.29545453 0.24350649 0.23701298 0.26948053 0.3409091 0.38636363 0.3116883 0.3181818 0.24675325 0.28896105 0.2564935 0.25324675 0.25974026 0.27597404 0.32142857 0.2792208 0.42532468
[38] 'CC8-IV-tst1'              0.26948053 0.26623377 0.25324675 0.27597404 0.25974026 0.26623377 0.26948053 0.3051948 0.2792208 0.26623377 0.30194804 0.26298702 0.26298702 0.3051948 0.29220778 0.2857143 0.27597404 0.27272728 0.25974026 0.23051947 0.24025974 0.2857143 0.2564935 0.27597404 0.27597404 0.24025974 0.24350649 0.26623377 0.16883117 0.19155844 0.1590909 0.19805194 0.116883114 0.14285715 0.15584415 0.16558442 0.116883114 0.0 0.16233766 0.23376623 0.22727273 0.12012987 0.16233766 0.13311689 0.28246754 0.29220778 0.25 0.2792208 0.36688313 0.37012988 0.33766234 0.35064936 0.37012988 0.45779222 0.41883117 0.39935064 0.39935064 0.4383117 0.42857143 0.41558442 0.4318182 0.43506494 0.45454547 0.45454547 0.29545453 0.2792208 0.28246754 0.3116883 0.33441558 0.3051948 0.3474026 0.29545453 0.20454545 0.23051947 0.47727272 0.42857143 0.42207792 0.27272728 0.2857143 0.26623377 0.24675325 0.26948053 0.24675325 0.3538961 0.3538961 0.36038962 0.22402598 0.23376623 0.2564935 0.23376623 0.26948053 0.33116883 0.26623377 0.25324675 0.23376623 0.26948053 0.25974026 0.26948053 0.30844155 0.33766234 0.38961038 0.35714287 0.34415585 0.26298702 0.3116883 0.29220778 0.24675325 0.27597404 0.27272728 0.33441558 0.2987013 0.42532468
[39] 'CC8-V'                    0.19480519 0.21103896 0.22727273 0.2564935 0.23051947 0.22077923 0.25 0.26623377 0.24675325 0.22077923 0.27272728 0.28896105 0.22727273 0.27597404 0.2564935 0.20779221 0.22402598 0.25324675 0.23376623 0.23701298 0.22077923 0.26948053 0.23701298 0.22402598 0.25 0.22727273 0.22402598 0.21103896 0.12337662 0.11038961 0.16558442 0.12987013 0.10714286 0.12987013 0.10064935 0.12662338 0.16233766 0.16233766 0.0 0.17207792 0.16883117 0.12337662 0.12662338 0.12662338 0.2857143 0.24025974 0.22402598 0.22402598 0.37662336 0.36688313 0.35064936 0.33766234 0.34415585 0.45454547 0.41558442 0.41883117 0.37662336 0.4448052 0.42207792 0.4318182 0.37987012 0.44805196 0.4025974 0.4383117 0.25974026 0.27597404 0.2792208 0.29220778 0.27597404 0.25 0.2792208 0.26623377 0.23051947 0.24350649 0.4642857 0.41558442 0.4318182 0.24025974 0.24675325 0.22402598 0.23701298 0.24350649 0.24675325 0.35064936 0.33766234 0.32467532 0.22402598 0.18506494 0.24025974 0.21103896 0.26298702 0.31493506 0.26948053 0.25324675 0.24025974 0.22402598 0.26298702 0.22402598 0.2857143 0.33441558 0.30844155 0.3051948 0.32792208 0.23701298 0.26623377 0.24025974 0.23701298 0.26298702 0.27272728 0.3116883 0.24025974 0.3961039
[40] 'CC8-VIII'                 0.3051948 0.28246754 0.30194804 0.3051948 0.31493506 0.32467532 0.33116883 0.2857143 0.32142857 0.2564935 0.29545453 0.30844155 0.25974026 0.3409091 0.3116883 0.2792208 0.29220778 0.25974026 0.26298702 0.2857143 0.2564935 0.30194804 0.26948053 0.2792208 0.29220778 0.3181818 0.24350649 0.24675325 0.21103896 0.19805194 0.25 0.20454545 0.19155844 0.20779221 0.21428572 0.18831168 0.22402598 0.23376623 0.17207792 0.0 0.16233766 0.2012987 0.22077923 0.21103896 0.30844155 0.24025974 0.2564935 0.27272728 0.4090909 0.40584415 0.39935064 0.37012988 0.37662336 0.4448052 0.42532468 0.42532468 0.4025974 0.42532468 0.45454547 0.44155845 0.4448052 0.45454547 0.46753246 0.47727272 0.3181818 0.30844155 0.2987013 0.36688313 0.36038962 0.31493506 0.32467532 0.3181818 0.2792208 0.28246754 0.4512987 0.42857143 0.42857143 0.28896105 0.30194804 0.2987013 0.32792208 0.32142857 0.28896105 0.3474026 0.35714287 0.3538961 0.24350649 0.24675325 0.2987013 0.27597404 0.28896105 0.32467532 0.30844155 0.2792208 0.3116883 0.2857143 0.30194804 0.27597404 0.2792208 0.36038962 0.3961039 0.33116883 0.35714287 0.29220778 0.3409091 0.30194804 0.2857143 0.29220778 0.32467532 0.36688313 0.3116883 0.43506494
[41] 'ST8-IIABCIrish'           0.27272728 0.29220778 0.2857143 0.33441558 0.34415585 0.3409091 0.35714287 0.29545453 0.33116883 0.30194804 0.29545453 0.33441558 0.28896105 0.29220778 0.3181818 0.28896105 0.33116883 0.28896105 0.31493506 0.30844155 0.29545453 0.27272728 0.2987013 0.29545453 0.3116883 0.33441558 0.28896105 0.3051948 0.19480519 0.16883117 0.1525974 0.16883117 0.18831168 0.16558442 0.16558442 0.16883117 0.23701298 0.22727273 0.16883117 0.16233766 0.0 0.18831168 0.18181819 0.17857143 0.30844155 0.3051948 0.28246754 0.32792208 0.38311687 0.41558442 0.4025974 0.41883117 0.42532468 0.46753246 0.4383117 0.42207792 0.4448052 0.45454547 0.40584415 0.45779222 0.45454547 0.4707792 0.46753246 0.49675325 0.32467532 0.33116883 0.33116883 0.34415585 0.36038962 0.32467532 0.3409091 0.32792208 0.2564935 0.30844155 0.48051947 0.4025974 0.44805196 0.2987013 0.2987013 0.27597404 0.2857143 0.34415585 0.3116883 0.38636363 0.37987012 0.4025974 0.2857143 0.29220778 0.34415585 0.29220778 0.33116883 0.3538961 0.30194804 0.26948053 0.33116883 0.25324675 0.31493506 0.3051948 0.33116883 0.36038962 0.38311687 0.37012988 0.41558442 0.32142857 0.3409091 0.3474026 0.3051948 0.31493506 0.3409091 0.37662336 0.31493506 0.46753246
[42] 'ST8-UK-12-13-IrishAR43'   0.23376623 0.24350649 0.22402598 0.26298702 0.25 0.25324675 0.2564935 0.26948053 0.25974026 0.23051947 0.27272728 0.2857143 0.23376623 0.27597404 0.25 0.25 0.23701298 0.22077923 0.24350649 0.23701298 0.22727273 0.24675325 0.23376623 0.23701298 0.27272728 0.2564935 0.23376623 0.24675325 0.12987013 0.16233766 0.12337662 0.13636364 0.08116883 0.09090909 0.12337662 0.13636364 0.14285715 0.12012987 0.12337662 0.2012987 0.18831168 0.0 0.11363637 0.09415584 0.2792208 0.26948053 0.22727273 0.26298702 0.38636363 0.39285713 0.35714287 0.36688313 0.36688313 0.45779222 0.43506494 0.4025974 0.39285713 0.4512987 0.42532468 0.4512987 0.45454547 0.44155845 0.46103895 0.47402596 0.29220778 0.28246754 0.2857143 0.32467532 0.33441558 0.30844155 0.33766234 0.28246754 0.19805194 0.23376623 0.4642857 0.44155845 0.43506494 0.25324675 0.28246754 0.24350649 0.24350649 0.26623377 0.23376623 0.35714287 0.35064936 0.34415585 0.23376623 0.22077923 0.24025974 0.22727273 0.27272728 0.32467532 0.24350649 0.25324675 0.25 0.21428572 0.25 0.25324675 0.2857143 0.32142857 0.36363637 0.3409091 0.35714287 0.25974026 0.2987013 0.25974026 0.26623377 0.26298702 0.26948053 0.34415585 0.29220778 0.44155845
[43] 'ST254-Hannover'           0.23701298 0.26623377 0.25 0.28896105 0.26298702 0.27272728 0.26948053 0.24025974 0.26623377 0.25 0.28246754 0.29220778 0.22727273 0.2564935 0.27272728 0.24675325 0.2792208 0.26298702 0.23701298 0.24675325 0.25324675 0.26623377 0.2564935 0.25324675 0.26623377 0.25324675 0.27597404 0.2792208 0.12662338 0.1396104 0.11363637 0.14935064 0.12662338 0.10064935 0.13311689 0.12337662 0.17532468 0.16233766 0.12662338 0.22077923 0.18181819 0.11363637 0.0 0.048701297 0.3051948 0.25 0.24350649 0.27597404 0.38961038 0.3961039 0.37662336 0.38636363 0.38636363 0.48701298 0.45454547 0.42857143 0.4090909 0.47402596 0.42532468 0.45779222 0.43506494 0.46103895 0.46753246 0.5 0.28246754 0.2792208 0.27597404 0.29545453 0.30194804 0.26948053 0.3051948 0.29220778 0.23376623 0.25324675 0.512987 0.44155845 0.4383117 0.26948053 0.27597404 0.2564935 0.24025974 0.25974026 0.2564935 0.37012988 0.37987012 0.37337664 0.24025974 0.22727273 0.28896105 0.23376623 0.29220778 0.3538961 0.25324675 0.2564935 0.2792208 0.20779221 0.26623377 0.2564935 0.2987013 0.3409091 0.36038962 0.3538961 0.37337664 0.26948053 0.2987013 0.28896105 0.26298702 0.25324675 0.30844155 0.35064936 0.2792208 0.42857143
[44] 'ST254-IV-V-Hann'          0.24350649 0.24675325 0.23051947 0.26298702 0.24350649 0.25324675 0.2564935 0.26948053 0.2792208 0.25324675 0.28896105 0.2857143 0.24025974 0.26623377 0.27597404 0.26298702 0.26298702 0.25324675 0.23376623 0.22402598 0.22402598 0.27597404 0.24675325 0.26298702 0.26948053 0.2564935 0.25 0.25974026 0.14285715 0.14935064 0.11363637 0.15584415 0.10714286 0.084415585 0.12662338 0.12337662 0.14610389 0.13311689 0.12662338 0.21103896 0.17857143 0.09415584 0.048701297 0.0 0.2857143 0.26298702 0.21753247 0.25974026 0.3961039 0.3961039 0.37987012 0.37662336 0.38311687 0.47727272 0.4383117 0.41558442 0.40584415 0.4642857 0.43506494 0.45779222 0.44805196 0.44155845 0.47402596 0.47402596 0.29220778 0.26623377 0.26948053 0.30844155 0.32142857 0.28896105 0.32142857 0.26623377 0.20779221 0.24350649 0.49025974 0.44155845 0.4318182 0.26623377 0.2857143 0.25974026 0.23701298 0.25 0.25 0.35714287 0.36038962 0.36038962 0.23051947 0.23051947 0.26623377 0.22077923 0.27597404 0.3474026 0.24350649 0.23701298 0.25974026 0.2012987 0.24350649 0.25974026 0.30844155 0.33441558 0.37337664 0.3474026 0.37012988 0.26623377 0.30844155 0.27597404 0.26948053 0.25324675 0.27597404 0.34415585 0.29220778 0.44155845
[45] 'CC9-IV'                   0.26623377 0.24350649 0.24025974 0.26623377 0.26948053 0.27597404 0.2792208 0.26948053 0.22077923 0.17532468 0.25324675 0.24350649 0.17857143 0.24675325 0.22402598 0.21428572 0.19480519 0.21103896 0.2012987 0.19155844 0.16233766 0.23051947 0.16883117 0.19155844 0.26623377 0.2564935 0.21753247 0.24025974 0.32792208 0.3181818 0.31493506 0.31493506 0.25974026 0.2857143 0.28246754 0.28896105 0.2564935 0.28246754 0.2857143 0.30844155 0.30844155 0.2792208 0.3051948 0.2857143 0.0 0.25 0.23051947 0.1525974 0.3116883 0.2857143 0.26623377 0.27272728 0.2792208 0.36038962 0.32142857 0.30194804 0.29220778 0.33441558 0.3538961 0.3474026 0.3474026 0.36038962 0.39285713 0.37012988 0.25974026 0.26298702 0.2564935 0.3116883 0.3116883 0.28246754 0.27272728 0.26298702 0.16558442 0.19155844 0.37662336 0.36688313 0.3116883 0.22402598 0.24350649 0.23051947 0.23051947 0.2564935 0.23051947 0.28246754 0.26948053 0.27597404 0.18506494 0.19805194 0.24675325 0.21428572 0.23376623 0.32142857 0.24350649 0.21103896 0.24675325 0.38636363 0.23376623 0.20454545 0.24675325 0.31493506 0.36688313 0.32792208 0.31493506 0.1525974 0.21103896 0.27272728 0.24350649 0.20454545 0.26623377 0.33766234 0.29545453 0.4383117
[46] 'CC12-WA59'                0.23376623 0.22727273 0.23376623 0.24350649 0.24025974 0.24675325 0.25 0.2857143 0.26623377 0.22402598 0.30844155 0.29220778 0.22727273 0.3181818 0.26623377 0.25974026 0.25 0.25 0.19805194 0.25 0.22402598 0.28246754 0.23376623 0.24675325 0.18181819 0.20779221 0.14935064 0.15584415 0.26623377 0.27272728 0.30194804 0.28896105 0.26948053 0.28896105 0.26298702 0.24675325 0.26948053 0.29220778 0.24025974 0.24025974 0.3051948 0.26948053 0.25 0.26298702 0.25 0.0 0.064935066 0.23701298 0.38961038 0.36688313 0.3538961 0.33766234 0.33766234 0.37987012 0.36688313 0.34415585 0.30844155 0.36363637 0.38961038 0.36038962 0.35064936 0.38311687 0.40584415 0.4090909 0.23376623 0.24350649 0.23051947 0.2987013 0.28246754 0.23376623 0.22402598 0.2564935 0.25 0.25324675 0.43506494 0.38311687 0.3538961 0.17857143 0.19155844 0.23376623 0.24025974 0.21428572 0.20454545 0.24350649 0.27272728 0.2564935 0.17857143 0.16233766 0.26948053 0.22402598 0.21103896 0.3051948 0.23701298 0.20779221 0.21103896 0.33441558 0.24350649 0.22402598 0.22727273 0.36363637 0.3961039 0.32467532 0.23376623 0.21428572 0.26298702 0.26298702 0.2012987 0.17207792 0.25 0.26948053 0.23051947 0.35714287
[47] 'CC12-IV'                  0.22402598 0.19480519 0.2012987 0.21753247 0.22402598 0.23051947 0.23376623 0.28246754 0.26298702 0.23051947 0.31493506 0.28896105 0.24675325 0.30844155 0.25 0.27597404 0.24350649 0.25 0.21428572 0.22077923 0.20454545 0.2792208 0.21753247 0.24350649 0.16883117 0.2012987 0.12337662 0.14610389 0.25974026 0.25324675 0.26623377 0.24675325 0.22402598 0.24675325 0.23701298 0.24350649 0.22727273 0.25 0.22402598 0.2564935 0.28246754 0.22727273 0.24350649 0.21753247 0.23051947 0.064935066 0.0 0.23051947 0.37987012 0.3538961 0.33441558 0.33441558 0.33441558 0.37662336 0.3409091 0.32467532 0.30844155 0.37012988 0.38311687 0.3538961 0.36688313 0.36038962 0.41233766 0.38961038 0.22077923 0.21753247 0.21103896 0.27597404 0.2792208 0.24350649 0.25 0.22727273 0.20779221 0.21103896 0.42207792 0.37012988 0.35064936 0.18831168 0.19480519 0.20454545 0.20779221 0.21428572 0.2012987 0.24675325 0.26623377 0.26623377 0.16883117 0.16883117 0.23376623 0.18831168 0.20779221 0.30844155 0.22727273 0.17207792 0.19805194 0.3116883 0.23051947 0.23051947 0.26298702 0.3409091 0.39285713 0.33766234 0.25324675 0.21428572 0.27272728 0.25 0.17532468 0.17207792 0.21753247 0.25324675 0.24025974 0.36688313
[48] 'CC20-V'                   0.26623377 0.24025974 0.24675325 0.24350649 0.24350649 0.25 0.25324675 0.25 0.21428572 0.16233766 0.26298702 0.23376623 0.18506494 0.2857143 0.21428572 0.19155844 0.16558442 0.18506494 0.16233766 0.19805194 0.14285715 0.23701298 0.16558442 0.16883117 0.24675325 0.22727273 0.17857143 0.16558442 0.29545453 0.28896105 0.31493506 0.30194804 0.2564935 0.2857143 0.27272728 0.2857143 0.25324675 0.2792208 0.22402598 0.27272728 0.32792208 0.26298702 0.27597404 0.25974026 0.1525974 0.23701298 0.23051947 0.0 0.32142857 0.28896105 0.26623377 0.23051947 0.22727273 0.38311687 0.34415585 0.3409091 0.29545453 0.3538961 0.38636363 0.36038962 0.32467532 0.3538961 0.36688313 0.35714287 0.26948053 0.24025974 0.25324675 0.30844155 0.2857143 0.25 0.27272728 0.26623377 0.17532468 0.17857143 0.38311687 0.37337664 0.32467532 0.22727273 0.24350649 0.21753247 0.22077923 0.20779221 0.19805194 0.2987013 0.30194804 0.26623377 0.17207792 0.14935064 0.2012987 0.16233766 0.21753247 0.3116883 0.20454545 0.21428572 0.20779221 0.37337664 0.20779221 0.14935064 0.2012987 0.3409091 0.37337664 0.3051948 0.28246754 0.1396104 0.18831168 0.22077923 0.17532468 0.19805194 0.2564935 0.30194804 0.26298702 0.3961039
[49] 'ST22-IV-Barnim'           0.33116883 0.3538961 0.3538961 0.38961038 0.38636363 0.38636363 0.39935064 0.3538961 0.30194804 0.32467532 0.3051948 0.3474026 0.3181818 0.32142857 0.32142857 0.29220778 0.33766234 0.33441558 0.32792208 0.2987013 0.30844155 0.3051948 0.3116883 0.3116883 0.35714287 0.38636363 0.35714287 0.37662336 0.37337664 0.3961039 0.38961038 0.37987012 0.37012988 0.3961039 0.37012988 0.36363637 0.38961038 0.36688313 0.37662336 0.4090909 0.38311687 0.38636363 0.38961038 0.3961039 0.3116883 0.38961038 0.37987012 0.32142857 0.0 0.1525974 0.13311689 0.14610389 0.14285715 0.32792208 0.30194804 0.28896105 0.3409091 0.33441558 0.2792208 0.2857143 0.28896105 0.31493506 0.30844155 0.33766234 0.36688313 0.37012988 0.38311687 0.39935064 0.4090909 0.38311687 0.37012988 0.38636363 0.2857143 0.3181818 0.40584415 0.37012988 0.37337664 0.33766234 0.35064936 0.32142857 0.33116883 0.37987012 0.37012988 0.35714287 0.3474026 0.37012988 0.3051948 0.3409091 0.3961039 0.34415585 0.38636363 0.36038962 0.3538961 0.38961038 0.39935064 0.44155845 0.34415585 0.33766234 0.3538961 0.29545453 0.3181818 0.33766234 0.26948053 0.2987013 0.3051948 0.38636363 0.34415585 0.34415585 0.36688313 0.36363637 0.4090909 0.37012988
[50] 'ST22-IV-ACME'             0.36038962 0.36688313 0.3538961 0.36688313 0.36038962 0.36688313 0.37012988 0.33441558 0.29220778 0.30844155 0.33766234 0.2857143 0.29220778 0.3538961 0.30194804 0.31493506 0.3181818 0.34415585 0.30844155 0.2987013 0.28246754 0.32467532 0.28896105 0.29545453 0.34415585 0.34415585 0.34415585 0.36688313 0.39285713 0.3961039 0.39935064 0.38961038 0.37012988 0.41558442 0.3538961 0.36688313 0.35064936 0.37012988 0.36688313 0.40584415 0.41558442 0.39285713 0.3961039 0.3961039 0.2857143 0.36688313 0.3538961 0.28896105 0.1525974 0.0 0.10064935 0.14285715 0.1396104 0.33766234 0.31493506 0.31493506 0.3181818 0.3116883 0.32142857 0.25324675 0.2987013 0.2987013 0.30844155 0.28246754 0.33766234 0.34415585 0.35064936 0.37012988 0.37662336 0.35064936 0.35714287 0.3538961 0.28246754 0.3051948 0.39935064 0.38636363 0.36363637 0.32467532 0.33441558 0.33441558 0.3474026 0.34415585 0.32792208 0.3409091 0.33766234 0.34415585 0.30844155 0.3181818 0.30194804 0.33116883 0.35714287 0.37662336 0.38636363 0.35714287 0.34415585 0.4448052 0.33116883 0.30844155 0.33116883 0.31493506 0.3538961 0.32467532 0.26298702 0.28246754 0.3051948 0.37012988 0.32792208 0.30194804 0.32142857 0.28246754 0.39935064 0.37012988
[51] 'ST22-IV-PVL'              0.32792208 0.3181818 0.3116883 0.32142857 0.31493506 0.32467532 0.32142857 0.32792208 0.27272728 0.28246754 0.3051948 0.29545453 0.27597404 0.32792208 0.2564935 0.28246754 0.26948053 0.31493506 0.29545453 0.26948053 0.25324675 0.3051948 0.26623377 0.26623377 0.32142857 0.32467532 0.3181818 0.3409091 0.36038962 0.37662336 0.37012988 0.37012988 0.33116883 0.37662336 0.3474026 0.3538961 0.3051948 0.33766234 0.35064936 0.39935064 0.4025974 0.35714287 0.37662336 0.37987012 0.26623377 0.3538961 0.33441558 0.26623377 0.13311689 0.10064935 0.0 0.10714286 0.103896104 0.3181818 0.2792208 0.2792208 0.2792208 0.2857143 0.29220778 0.2564935 0.27597404 0.27272728 0.2987013 0.2857143 0.31493506 0.3409091 0.34415585 0.34415585 0.36363637 0.3409091 0.33766234 0.3474026 0.26298702 0.26298702 0.38311687 0.37012988 0.33766234 0.30194804 0.30194804 0.2987013 0.29545453 0.29545453 0.30844155 0.32467532 0.2987013 0.32142857 0.28896105 0.30194804 0.33116883 0.3051948 0.3409091 0.3409091 0.35064936 0.34415585 0.3181818 0.4448052 0.32467532 0.3051948 0.3116883 0.29220778 0.3409091 0.2987013 0.23376623 0.26623377 0.26623377 0.3538961 0.32467532 0.2987013 0.33766234 0.30194804 0.37662336 0.35714287
[52] 'ST22-V'                   0.34415585 0.32792208 0.32792208 0.32792208 0.30194804 0.30194804 0.30844155 0.34415585 0.29545453 0.25974026 0.3409091 0.32467532 0.2857143 0.37337664 0.30844155 0.2792208 0.25974026 0.29220778 0.26298702 0.26948053 0.24025974 0.33766234 0.2564935 0.26623377 0.32792208 0.32792208 0.30844155 0.29545453 0.37012988 0.3961039 0.41883117 0.41558442 0.3538961 0.4025974 0.38636363 0.38311687 0.32467532 0.35064936 0.33766234 0.37012988 0.41883117 0.36688313 0.38636363 0.37662336 0.27272728 0.33766234 0.33441558 0.23051947 0.14610389 0.14285715 0.10714286 0.0 0.06818182 0.3538961 0.30844155 0.2987013 0.25974026 0.30194804 0.3181818 0.26298702 0.24675325 0.28896105 0.29545453 0.2857143 0.33766234 0.3409091 0.33441558 0.37337664 0.35064936 0.32792208 0.32142857 0.32142857 0.27597404 0.25974026 0.37987012 0.37337664 0.32792208 0.3181818 0.33116883 0.32142857 0.32792208 0.29545453 0.30194804 0.30194804 0.30844155 0.2792208 0.27272728 0.26623377 0.3116883 0.27597404 0.30844155 0.30844155 0.3409091 0.3409091 0.3051948 0.44805196 0.32792208 0.2564935 0.28896105 0.3051948 0.33766234 0.26948053 0.19480519 0.20779221 0.24675325 0.32142857 0.32142857 0.2987013 0.33116883 0.3116883 0.36688313 0.33766234
[53] 'ST22-V-PVL'               0.34415585 0.32142857 0.33441558 0.32467532 0.30194804 0.3181818 0.3116883 0.34415585 0.3116883 0.26948053 0.35714287 0.3474026 0.29545453 0.38311687 0.30194804 0.29220778 0.26298702 0.3051948 0.26298702 0.29545453 0.25324675 0.35064936 0.26948053 0.26623377 0.33441558 0.33441558 0.30844155 0.29545453 0.37337664 0.39935064 0.42532468 0.41883117 0.37012988 0.39935064 0.37337664 0.37337664 0.32792208 0.37012988 0.34415585 0.37662336 0.42532468 0.36688313 0.38636363 0.38311687 0.2792208 0.33766234 0.33441558 0.22727273 0.14285715 0.1396104 0.103896104 0.06818182 0.0 0.35064936 0.30194804 0.29545453 0.24675325 0.3051948 0.31493506 0.2857143 0.2564935 0.28246754 0.2987013 0.28896105 0.33766234 0.3409091 0.33116883 0.37662336 0.3474026 0.32792208 0.31493506 0.34415585 0.2792208 0.25 0.37987012 0.37337664 0.33441558 0.32792208 0.33116883 0.33441558 0.33116883 0.29220778 0.3181818 0.3051948 0.2987013 0.28246754 0.28896105 0.26948053 0.3051948 0.2792208 0.3051948 0.2857143 0.33766234 0.3474026 0.30844155 0.4448052 0.32467532 0.26298702 0.28896105 0.3051948 0.3409091 0.25974026 0.19155844 0.22402598 0.25324675 0.33441558 0.32467532 0.29220778 0.32467532 0.31493506 0.37662336 0.34415585
[54] 'ST36-II-UK-16'            0.41883117 0.4025974 0.39935064 0.42532468 0.42532468 0.42532468 0.4383117 0.43506494 0.38311687 0.40584415 0.3538961 0.39285713 0.39285713 0.44805196 0.41233766 0.4318182 0.42207792 0.41558442 0.41558442 0.38961038 0.39285713 0.4318182 0.4025974 0.41233766 0.3961039 0.42857143 0.37987012 0.4025974 0.4642857 0.48051947 0.48051947 0.45779222 0.43506494 0.4707792 0.47402596 0.47402596 0.4512987 0.45779222 0.45454547 0.4448052 0.46753246 0.45779222 0.48701298 0.47727272 0.36038962 0.37987012 0.37662336 0.38311687 0.32792208 0.33766234 0.3181818 0.3538961 0.35064936 0.0 0.097402595 0.116883114 0.14935064 0.20454545 0.25324675 0.24675325 0.24350649 0.26623377 0.27272728 0.26948053 0.39285713 0.3961039 0.4090909 0.4383117 0.4642857 0.42857143 0.4090909 0.40584415 0.38311687 0.3961039 0.4318182 0.45454547 0.4025974 0.3961039 0.37662336 0.37337664 0.3961039 0.41558442 0.39935064 0.33766234 0.32792208 0.34415585 0.3961039 0.43506494 0.47727272 0.45454547 0.36363637 0.41558442 0.39935064 0.4025974 0.41233766 0.44805196 0.37337664 0.38311687 0.37662336 0.29545453 0.3474026 0.3181818 0.31493506 0.38311687 0.41883117 0.4448052 0.39285713 0.3961039 0.4090909 0.33766234 0.41558442 0.33441558
[55] 'ST30-IV-PVL-SWP'          0.37987012 0.3474026 0.36363637 0.38636363 0.37662336 0.38636363 0.3961039 0.42207792 0.37662336 0.36363637 0.37337664 0.4090909 0.39285713 0.42532468 0.37662336 0.38961038 0.37012988 0.39935064 0.38311687 0.34415585 0.3538961 0.41558442 0.37337664 0.37987012 0.36688313 0.38311687 0.34415585 0.36688313 0.43506494 0.44805196 0.4642857 0.4448052 0.38636363 0.44155845 0.42532468 0.4318182 0.39285713 0.41883117 0.41558442 0.42532468 0.4383117 0.43506494 0.45454547 0.4383117 0.32142857 0.36688313 0.3409091 0.34415585 0.30194804 0.31493506 0.2792208 0.30844155 0.30194804 0.097402595 0.0 0.103896104 0.103896104 0.24350649 0.23376623 0.21753247 0.21753247 0.23376623 0.25324675 0.22727273 0.36363637 0.36038962 0.37662336 0.38311687 0.4025974 0.3961039 0.36688313 0.36363637 0.34415585 0.34415585 0.39935064 0.41558442 0.37987012 0.36038962 0.3538961 0.32792208 0.33441558 0.3538961 0.3538961 0.30844155 0.28246754 0.3181818 0.36038962 0.39935064 0.42532468 0.4025974 0.3409091 0.37337664 0.3538961 0.3474026 0.36363637 0.44805196 0.34415585 0.35064936 0.36363637 0.2792208 0.32467532 0.27272728 0.29545453 0.3474026 0.36363637 0.4090909 0.34415585 0.36038962 0.38636363 0.29220778 0.37337664 0.30194804
[56] 'ST30-IV-tst1'             0.37337664 0.37337664 0.35714287 0.37987012 0.37662336 0.37987012 0.38636363 0.4025974 0.38636363 0.36038962 0.42207792 0.42207792 0.36688313 0.41883117 0.37662336 0.39285713 0.37012988 0.37012988 0.36038962 0.36363637 0.34415585 0.38961038 0.3538961 0.37662336 0.33441558 0.37662336 0.33116883 0.3538961 0.4025974 0.43506494 0.4512987 0.4448052 0.4090909 0.42857143 0.41233766 0.41233766 0.40584415 0.39935064 0.41883117 0.42532468 0.42207792 0.4025974 0.42857143 0.41558442 0.30194804 0.34415585 0.32467532 0.3409091 0.28896105 0.31493506 0.2792208 0.2987013 0.29545453 0.116883114 0.103896104 0.0 0.103896104 0.24350649 0.23376623 0.21428572 0.22727273 0.22727273 0.2564935 0.23701298 0.36038962 0.33766234 0.3538961 0.4025974 0.41883117 0.37662336 0.34415585 0.36688313 0.32792208 0.35064936 0.39285713 0.39935064 0.35714287 0.3538961 0.36688313 0.36688313 0.3538961 0.36688313 0.36363637 0.28246754 0.29545453 0.29545453 0.36688313 0.37987012 0.42857143 0.3961039 0.32467532 0.34415585 0.32792208 0.3474026 0.36363637 0.44805196 0.34415585 0.33441558 0.3474026 0.25 0.30194804 0.26948053 0.26948053 0.33116883 0.37662336 0.41233766 0.33441558 0.3409091 0.3538961 0.2987013 0.38961038 0.2792208
[57] 'CC30-V-PVL'               0.37662336 0.3474026 0.3538961 0.3538961 0.30194804 0.32142857 0.3116883 0.40584415 0.37987012 0.33441558 0.42857143 0.41558442 0.35714287 0.4512987 0.37662336 0.36038962 0.32792208 0.37012988 0.3181818 0.35714287 0.32142857 0.41558442 0.3409091 0.33766234 0.33441558 0.31493506 0.3181818 0.3051948 0.4025974 0.42532468 0.4448052 0.4512987 0.38961038 0.42857143 0.4025974 0.40584415 0.35064936 0.39935064 0.37662336 0.4025974 0.4448052 0.39285713 0.4090909 0.40584415 0.29220778 0.30844155 0.30844155 0.29545453 0.3409091 0.3181818 0.2792208 0.25974026 0.24675325 0.14935064 0.103896104 0.103896104 0.0 0.23701298 0.25974026 0.22402598 0.19155844 0.23376623 0.24675325 0.23376623 0.32142857 0.32467532 0.32792208 0.37012988 0.33766234 0.32467532 0.2857143 0.32792208 0.3409091 0.32142857 0.39285713 0.4090909 0.3474026 0.33116883 0.33766234 0.3409091 0.33116883 0.2792208 0.30844155 0.26298702 0.25974026 0.23701298 0.3538961 0.3116883 0.37012988 0.3538961 0.25974026 0.28896105 0.32467532 0.32467532 0.28896105 0.42857143 0.33116883 0.28246754 0.31493506 0.26948053 0.2987013 0.20779221 0.20779221 0.28896105 0.33441558 0.36363637 0.32792208 0.3051948 0.3474026 0.27272728 0.34415585 0.27272728
[58] 'ST45-II-USA600'           0.37987012 0.37012988 0.37987012 0.38961038 0.4025974 0.4090909 0.41233766 0.4512987 0.42857143 0.37012988 0.37662336 0.37987012 0.37337664 0.45454547 0.4090909 0.40584415 0.39935064 0.40584415 0.36038962 0.4025974 0.36688313 0.42532468 0.36038962 0.38961038 0.37012988 0.41233766 0.33766234 0.36038962 0.44155845 0.47727272 0.49025974 0.48051947 0.4318182 0.4642857 0.46753246 0.46753246 0.42857143 0.4383117 0.4448052 0.42532468 0.45454547 0.4512987 0.47402596 0.4642857 0.33441558 0.36363637 0.37012988 0.3538961 0.33441558 0.3116883 0.2857143 0.30194804 0.3051948 0.20454545 0.24350649 0.24350649 0.23701298 0.0 0.12012987 0.14935064 0.12987013 0.17857143 0.23051947 0.2012987 0.36688313 0.37012988 0.3538961 0.40584415 0.41558442 0.38311687 0.35714287 0.36363637 0.36038962 0.36688313 0.37987012 0.40584415 0.35714287 0.37662336 0.37662336 0.37662336 0.39935064 0.4090909 0.39285713 0.30844155 0.3051948 0.3181818 0.38311687 0.39285713 0.4512987 0.42207792 0.33441558 0.36363637 0.39935064 0.36363637 0.37662336 0.46103895 0.35714287 0.33766234 0.32142857 0.25974026 0.32467532 0.26948053 0.28246754 0.35064936 0.38961038 0.42532468 0.37662336 0.35064936 0.36688313 0.28896105 0.4025974 0.30844155
[59] 'ST45-IV-Berlin'           0.35064936 0.37337664 0.37012988 0.41558442 0.42207792 0.42207792 0.4318182 0.4318182 0.42532468 0.40584415 0.4090909 0.44805196 0.4025974 0.40584415 0.41558442 0.39935064 0.42532468 0.4025974 0.3961039 0.4090909 0.39935064 0.38636363 0.39285713 0.3961039 0.36688313 0.40584415 0.36038962 0.37987012 0.38961038 0.4448052 0.43506494 0.44155845 0.42207792 0.4318182 0.40584415 0.40584415 0.4448052 0.42857143 0.42207792 0.45454547 0.40584415 0.42532468 0.42532468 0.43506494 0.3538961 0.38961038 0.38311687 0.38636363 0.2792208 0.32142857 0.29220778 0.3181818 0.31493506 0.25324675 0.23376623 0.23376623 0.25974026 0.12012987 0.0 0.14285715 0.116883114 0.19805194 0.2012987 0.21103896 0.37012988 0.37987012 0.37012988 0.39935064 0.40584415 0.37337664 0.35714287 0.37012988 0.35064936 0.39285713 0.3961039 0.37012988 0.37012988 0.36688313 0.37337664 0.33766234 0.35064936 0.42207792 0.39935064 0.32467532 0.3116883 0.33441558 0.38311687 0.40584415 0.4642857 0.42532468 0.36038962 0.36688313 0.38636363 0.37987012 0.4025974 0.4318182 0.36363637 0.36038962 0.36688313 0.23376623 0.28896105 0.28246754 0.2987013 0.37012988 0.35714287 0.4448052 0.37337664 0.37012988 0.37987012 0.2857143 0.3961039 0.28246754
[60] 'CC45-IV-ACME'             0.38311687 0.37012988 0.37987012 0.38311687 0.38311687 0.38636363 0.39285713 0.4025974 0.37012988 0.37337664 0.40584415 0.36038962 0.37337664 0.4383117 0.37987012 0.39935064 0.38961038 0.3961039 0.36038962 0.36363637 0.35064936 0.41558442 0.35714287 0.36363637 0.3474026 0.36688313 0.33766234 0.36038962 0.42207792 0.45454547 0.47402596 0.4707792 0.44155845 0.47727272 0.41883117 0.44155845 0.4090909 0.41558442 0.4318182 0.44155845 0.45779222 0.4512987 0.45779222 0.45779222 0.3474026 0.36038962 0.3538961 0.36038962 0.2857143 0.25324675 0.2564935 0.26298702 0.2857143 0.24675325 0.21753247 0.21428572 0.22402598 0.14935064 0.14285715 0.0 0.103896104 0.19480519 0.21753247 0.18831168 0.34415585 0.33766234 0.35714287 0.38636363 0.38961038 0.36363637 0.32792208 0.37012988 0.38636363 0.35714287 0.4025974 0.39285713 0.36363637 0.35714287 0.36688313 0.37662336 0.37662336 0.38311687 0.36038962 0.30844155 0.32467532 0.32792208 0.37662336 0.38961038 0.39935064 0.42207792 0.32467532 0.37662336 0.4025974 0.35064936 0.36363637 0.48376623 0.35714287 0.35064936 0.33766234 0.26948053 0.3116883 0.26623377 0.26623377 0.3474026 0.36688313 0.4383117 0.3409091 0.35064936 0.32467532 0.23376623 0.39935064 0.25
[61] 'ST45-V-WA4'               0.36363637 0.35714287 0.36688313 0.38636363 0.36038962 0.3538961 0.37662336 0.41558442 0.36688313 0.36363637 0.40584415 0.41233766 0.36688313 0.42207792 0.38961038 0.35714287 0.36038962 0.39285713 0.33441558 0.36363637 0.35064936 0.41233766 0.3538961 0.35714287 0.35064936 0.36038962 0.34415585 0.33116883 0.39935064 0.42857143 0.47727272 0.47402596 0.4448052 0.47402596 0.42207792 0.42857143 0.41558442 0.4318182 0.37987012 0.4448052 0.45454547 0.45454547 0.43506494 0.44805196 0.3474026 0.35064936 0.36688313 0.32467532 0.28896105 0.2987013 0.27597404 0.24675325 0.2564935 0.24350649 0.21753247 0.22727273 0.19155844 0.12987013 0.116883114 0.103896104 0.0 0.18506494 0.17857143 0.18181819 0.34415585 0.36688313 0.35064936 0.37662336 0.34415585 0.32467532 0.30194804 0.34415585 0.37337664 0.37662336 0.41233766 0.3961039 0.36688313 0.3538961 0.3538961 0.3538961 0.34415585 0.36038962 0.36363637 0.3051948 0.2987013 0.2792208 0.37012988 0.3538961 0.41558442 0.38311687 0.3051948 0.3409091 0.38961038 0.36688313 0.3474026 0.45779222 0.3538961 0.3116883 0.33441558 0.27272728 0.27597404 0.22402598 0.24025974 0.30844155 0.32467532 0.4025974 0.35064936 0.35064936 0.36363637 0.26623377 0.37337664 0.23051947
[62] 'CC45-agrIV-IV-WA23'       0.39935064 0.37662336 0.37987012 0.39285713 0.40584415 0.40584415 0.41558442 0.44805196 0.4090909 0.3961039 0.4318182 0.44805196 0.41558442 0.45454547 0.38961038 0.40584415 0.39935064 0.41883117 0.36688313 0.38961038 0.37987012 0.42857143 0.37662336 0.40584415 0.3474026 0.3961039 0.35064936 0.37662336 0.42207792 0.43506494 0.45779222 0.43506494 0.4318182 0.44805196 0.4512987 0.43506494 0.41558442 0.43506494 0.44805196 0.45454547 0.4707792 0.44155845 0.46103895 0.44155845 0.36038962 0.38311687 0.36038962 0.3538961 0.31493506 0.2987013 0.27272728 0.28896105 0.28246754 0.26623377 0.23376623 0.22727273 0.23376623 0.17857143 0.19805194 0.19480519 0.18506494 0.0 0.12662338 0.097402595 0.3409091 0.33441558 0.33116883 0.38636363 0.39285713 0.3538961 0.34415585 0.34415585 0.36688313 0.38311687 0.36688313 0.41233766 0.36688313 0.37012988 0.38311687 0.37662336 0.37662336 0.3961039 0.37987012 0.29545453 0.3051948 0.3181818 0.39935064 0.41558442 0.44155845 0.42207792 0.30844155 0.35714287 0.37987012 0.38636363 0.38636363 0.46103895 0.34415585 0.33116883 0.32792208 0.2564935 0.32142857 0.26948053 0.27272728 0.3538961 0.38636363 0.41558442 0.37987012 0.3409091 0.36363637 0.2792208 0.38311687 0.2564935
[63] 'CC45-agrIV-V'             0.37662336 0.40584415 0.39935064 0.42857143 0.40584415 0.40584415 0.42207792 0.4642857 0.4090909 0.4025974 0.4318182 0.44805196 0.40584415 0.4383117 0.4090909 0.36688313 0.3961039 0.39935064 0.4025974 0.43506494 0.3961039 0.41558442 0.4090909 0.3961039 0.39935064 0.37337664 0.4090909 0.39285713 0.42207792 0.45454547 0.4642857 0.44155845 0.4512987 0.47402596 0.45779222 0.45454547 0.46103895 0.45454547 0.4025974 0.46753246 0.46753246 0.46103895 0.46753246 0.47402596 0.39285713 0.40584415 0.41233766 0.36688313 0.30844155 0.30844155 0.2987013 0.29545453 0.2987013 0.27272728 0.25324675 0.2564935 0.24675325 0.23051947 0.2012987 0.21753247 0.17857143 0.12662338 0.0 0.10064935 0.35714287 0.36363637 0.38311687 0.38961038 0.36688313 0.3474026 0.34415585 0.38636363 0.39285713 0.42857143 0.40584415 0.41883117 0.4090909 0.37987012 0.37987012 0.37337664 0.39285713 0.4025974 0.38961038 0.36363637 0.3538961 0.33766234 0.42532468 0.41883117 0.4383117 0.41558442 0.32142857 0.35714287 0.41883117 0.41558442 0.3961039 0.45779222 0.38961038 0.3409091 0.36363637 0.26948053 0.28896105 0.2792208 0.28896105 0.37337664 0.37337664 0.42207792 0.41233766 0.39935064 0.4025974 0.28896105 0.36363637 0.29545453
[64] 'CC45-agrIV-IV-V'          0.4025974 0.39285713 0.38961038 0.40584415 0.39935064 0.39935064 0.41558442 0.48051947 0.41558442 0.3961039 0.45454547 0.4318182 0.42532468 0.47727272 0.42207792 0.41558442 0.4025974 0.42532468 0.38311687 0.4090909 0.37987012 0.45454547 0.37987012 0.40584415 0.38636363 0.3961039 0.38311687 0.3961039 0.45779222 0.47402596 0.5064935 0.47402596 0.44805196 0.47727272 0.45454547 0.47402596 0.42532468 0.45454547 0.4383117 0.47727272 0.49675325 0.47402596 0.5 0.47402596 0.37012988 0.4090909 0.38961038 0.35714287 0.33766234 0.28246754 0.2857143 0.2857143 0.28896105 0.26948053 0.22727273 0.23701298 0.23376623 0.2012987 0.21103896 0.18831168 0.18181819 0.097402595 0.10064935 0.0 0.36038962 0.3409091 0.3538961 0.38311687 0.38311687 0.36688313 0.36038962 0.3538961 0.38636363 0.39935064 0.37987012 0.42857143 0.38636363 0.38961038 0.3961039 0.38961038 0.3961039 0.4025974 0.38636363 0.32792208 0.3181818 0.32142857 0.41233766 0.42532468 0.41558442 0.42532468 0.32142857 0.36688313 0.41558442 0.39285713 0.38636363 0.4512987 0.37662336 0.3409091 0.3538961 0.26948053 0.32792208 0.27272728 0.28246754 0.36363637 0.38961038 0.42207792 0.39935064 0.36688313 0.36038962 0.25 0.40584415 0.2987013
[65] 'CC59-IV-PVL-USA1000'      0.24350649 0.23051947 0.25 0.25 0.2564935 0.26948053 0.26623377 0.3116883 0.3051948 0.28896105 0.3474026 0.33441558 0.2857143 0.33766234 0.28896105 0.3181818 0.2987013 0.2987013 0.27597404 0.29545453 0.2792208 0.31493506 0.27272728 0.2857143 0.20454545 0.23376623 0.20779221 0.23376623 0.2857143 0.2792208 0.2987013 0.30844155 0.28246754 0.2987013 0.25324675 0.26948053 0.2564935 0.29545453 0.25974026 0.3181818 0.32467532 0.29220778 0.28246754 0.29220778 0.25974026 0.23376623 0.22077923 0.26948053 0.36688313 0.33766234 0.31493506 0.33766234 0.33766234 0.39285713 0.36363637 0.36038962 0.32142857 0.36688313 0.37012988 0.34415585 0.34415585 0.3409091 0.35714287 0.36038962 0.0 0.084415585 0.077922076 0.116883114 0.10064935 0.084415585 0.10714286 0.077922076 0.24025974 0.22402598 0.41883117 0.38636363 0.33766234 0.21103896 0.18181819 0.23376623 0.19805194 0.22727273 0.23051947 0.31493506 0.31493506 0.33441558 0.22727273 0.21428572 0.2857143 0.26298702 0.24350649 0.29545453 0.23701298 0.24350649 0.2564935 0.35064936 0.24350649 0.24675325 0.25 0.30844155 0.32467532 0.29545453 0.28246754 0.25324675 0.25324675 0.29545453 0.21103896 0.2012987 0.22077923 0.26948053 0.22402598 0.3409091
[66] 'ST59-IV-WA73'             0.26623377 0.24675325 0.25 0.24350649 0.26298702 0.27597404 0.27272728 0.32792208 0.33116883 0.2857143 0.37012988 0.33766234 0.2987013 0.37012988 0.32792208 0.33441558 0.3051948 0.3051948 0.26623377 0.29545453 0.27597404 0.33441558 0.26948053 0.28896105 0.21103896 0.23376623 0.20454545 0.22727273 0.30844155 0.30844155 0.32467532 0.32792208 0.27597404 0.28246754 0.28246754 0.29220778 0.25974026 0.2792208 0.27597404 0.30844155 0.33116883 0.28246754 0.2792208 0.26623377 0.26298702 0.24350649 0.21753247 0.24025974 0.37012988 0.34415585 0.3409091 0.3409091 0.3409091 0.3961039 0.36038962 0.33766234 0.32467532 0.37012988 0.37987012 0.33766234 0.36688313 0.33441558 0.36363637 0.3409091 0.084415585 0.0 0.07467532 0.12337662 0.14285715 0.10064935 0.12012987 0.10714286 0.23701298 0.23376623 0.4090909 0.38961038 0.32142857 0.22402598 0.23376623 0.26298702 0.24025974 0.24350649 0.23376623 0.3051948 0.31493506 0.31493506 0.22727273 0.22077923 0.25974026 0.24350649 0.23376623 0.28896105 0.22727273 0.21103896 0.24025974 0.3409091 0.23376623 0.24025974 0.25324675 0.2857143 0.3409091 0.28896105 0.26948053 0.2564935 0.2857143 0.28896105 0.19480519 0.20454545 0.21428572 0.26623377 0.26298702 0.3474026
[67] 'ST87-IV-WA24'             0.26623377 0.24025974 0.2564935 0.25324675 0.25974026 0.27272728 0.2564935 0.3116883 0.33441558 0.27272728 0.36038962 0.35064936 0.2987013 0.35064936 0.31493506 0.32142857 0.30194804 0.29545453 0.25324675 0.29220778 0.26623377 0.3116883 0.25324675 0.29220778 0.20454545 0.24350649 0.19480519 0.21753247 0.3051948 0.30844155 0.32142857 0.33441558 0.26298702 0.2792208 0.27597404 0.2792208 0.23701298 0.28246754 0.2792208 0.2987013 0.33116883 0.2857143 0.27597404 0.26948053 0.2564935 0.23051947 0.21103896 0.25324675 0.38311687 0.35064936 0.34415585 0.33441558 0.33116883 0.4090909 0.37662336 0.3538961 0.32792208 0.3538961 0.37012988 0.35714287 0.35064936 0.33116883 0.38311687 0.3538961 0.077922076 0.07467532 0.0 0.13311689 0.116883114 0.064935066 0.12987013 0.064935066 0.21753247 0.21103896 0.40584415 0.38636363 0.33116883 0.21428572 0.21103896 0.24675325 0.24025974 0.23376623 0.23701298 0.2987013 0.31493506 0.3181818 0.21753247 0.20779221 0.26948053 0.24350649 0.23376623 0.2857143 0.23701298 0.22077923 0.24025974 0.35064936 0.22727273 0.22727273 0.23051947 0.31493506 0.36363637 0.29545453 0.2792208 0.25 0.27272728 0.2857143 0.20779221 0.17857143 0.22077923 0.28246754 0.2564935 0.35714287
[68] 'ST59-IV-PVL-WA55'         0.27597404 0.26948053 0.2792208 0.2792208 0.28896105 0.2987013 0.29545453 0.35064936 0.3538961 0.32792208 0.37987012 0.35714287 0.31493506 0.37012988 0.34415585 0.35714287 0.3409091 0.3474026 0.33116883 0.33441558 0.32792208 0.3538961 0.31493506 0.33441558 0.24350649 0.24675325 0.25974026 0.2792208 0.32792208 0.32467532 0.33766234 0.3538961 0.2987013 0.32467532 0.28896105 0.30844155 0.27272728 0.3116883 0.29220778 0.36688313 0.34415585 0.32467532 0.29545453 0.30844155 0.3116883 0.2987013 0.27597404 0.30844155 0.39935064 0.37012988 0.34415585 0.37337664 0.37662336 0.4383117 0.38311687 0.4025974 0.37012988 0.40584415 0.39935064 0.38636363 0.37662336 0.38636363 0.38961038 0.38311687 0.116883114 0.12337662 0.13311689 0.0 0.06818182 0.14285715 0.18831168 0.11038961 0.27272728 0.25974026 0.47402596 0.42207792 0.38636363 0.25974026 0.24025974 0.2792208 0.23051947 0.27597404 0.27597404 0.37987012 0.3538961 0.37662336 0.28246754 0.27597404 0.3116883 0.2792208 0.3051948 0.33766234 0.27272728 0.25 0.26298702 0.35714287 0.28896105 0.29220778 0.30844155 0.3474026 0.36363637 0.3409091 0.32792208 0.3116883 0.29545453 0.33116883 0.25324675 0.26298702 0.2857143 0.28896105 0.27272728 0.38636363
[69] 'ST59-VT-PVL-Taiwan'       0.2792208 0.27597404 0.2857143 0.28896105 0.26623377 0.2792208 0.26948053 0.3474026 0.36038962 0.32142857 0.3961039 0.37337664 0.32792208 0.37662336 0.3538961 0.3181818 0.30844155 0.33766234 0.3051948 0.34415585 0.31493506 0.36038962 0.3181818 0.31493506 0.24350649 0.22077923 0.26298702 0.24350649 0.32467532 0.32467532 0.35064936 0.37012988 0.32142857 0.34415585 0.2987013 0.3116883 0.28896105 0.33441558 0.27597404 0.36038962 0.36038962 0.33441558 0.30194804 0.32142857 0.3116883 0.28246754 0.2792208 0.2857143 0.4090909 0.37662336 0.36363637 0.35064936 0.3474026 0.4642857 0.4025974 0.41883117 0.33766234 0.41558442 0.40584415 0.38961038 0.34415585 0.39285713 0.36688313 0.38311687 0.10064935 0.14285715 0.116883114 0.06818182 0.0 0.10064935 0.14935064 0.09415584 0.28246754 0.26298702 0.48376623 0.43506494 0.39935064 0.25974026 0.24025974 0.2792208 0.24675325 0.24350649 0.2564935 0.38636363 0.37012988 0.3538961 0.28246754 0.23051947 0.27272728 0.25 0.26623377 0.30194804 0.27597404 0.25324675 0.24350649 0.36038962 0.2857143 0.25324675 0.28246754 0.36688313 0.3474026 0.31493506 0.30844155 0.27597404 0.26298702 0.3181818 0.25974026 0.25 0.26948053 0.29220778 0.25 0.37662336
[70] 'ST59-V'                   0.25974026 0.26623377 0.26948053 0.2792208 0.25974026 0.26623377 0.26948053 0.32142857 0.32142857 0.28246754 0.36363637 0.35714287 0.2857143 0.3474026 0.3181818 0.29220778 0.29220778 0.3051948 0.2564935 0.3116883 0.28246754 0.31493506 0.2792208 0.28246754 0.21428572 0.22077923 0.22402598 0.21753247 0.30194804 0.2987013 0.3181818 0.32792208 0.3051948 0.29545453 0.2857143 0.2987013 0.2792208 0.3051948 0.25 0.31493506 0.32467532 0.30844155 0.26948053 0.28896105 0.28246754 0.23376623 0.24350649 0.25 0.38311687 0.35064936 0.3409091 0.32792208 0.32792208 0.42857143 0.3961039 0.37662336 0.32467532 0.38311687 0.37337664 0.36363637 0.32467532 0.3538961 0.3474026 0.36688313 0.084415585 0.10064935 0.064935066 0.14285715 0.10064935 0.0 0.103896104 0.09415584 0.24350649 0.23701298 0.4383117 0.38636363 0.35064936 0.22077923 0.22402598 0.24675325 0.24025974 0.22402598 0.24025974 0.32792208 0.33116883 0.3116883 0.24675325 0.19480519 0.26298702 0.21753247 0.23376623 0.2792208 0.25 0.23701298 0.23376623 0.33766234 0.26298702 0.23701298 0.25324675 0.33116883 0.33116883 0.28246754 0.26623377 0.24350649 0.25324675 0.29220778 0.22077923 0.21428572 0.23701298 0.27597404 0.23376623 0.3409091
[71] 'CC59-V-PVL'               0.28246754 0.2792208 0.2987013 0.26948053 0.26623377 0.29220778 0.27597404 0.3474026 0.3409091 0.30194804 0.38961038 0.37012988 0.30844155 0.38961038 0.33116883 0.3181818 0.28896105 0.32467532 0.2564935 0.33116883 0.2987013 0.3538961 0.2987013 0.29545453 0.22077923 0.24350649 0.23701298 0.23051947 0.3116883 0.32142857 0.36688313 0.36363637 0.3409091 0.34415585 0.2987013 0.29220778 0.29545453 0.3474026 0.2792208 0.32467532 0.3409091 0.33766234 0.3051948 0.32142857 0.27272728 0.22402598 0.25 0.27272728 0.37012988 0.35714287 0.33766234 0.32142857 0.31493506 0.4090909 0.36688313 0.34415585 0.2857143 0.35714287 0.35714287 0.32792208 0.30194804 0.34415585 0.34415585 0.36038962 0.10714286 0.12012987 0.12987013 0.18831168 0.14935064 0.103896104 0.0 0.14935064 0.2987013 0.29220778 0.41558442 0.3538961 0.3181818 0.23701298 0.24025974 0.27272728 0.25324675 0.23376623 0.26298702 0.28896105 0.28896105 0.27597404 0.25974026 0.23376623 0.31493506 0.2792208 0.23376623 0.25 0.24675325 0.25 0.25 0.38311687 0.29545453 0.25324675 0.2564935 0.31493506 0.32142857 0.24350649 0.25974026 0.25974026 0.26298702 0.30194804 0.24025974 0.22402598 0.2564935 0.26623377 0.25 0.3051948
[72] 'ST59-IV-V-WA15'           0.2564935 0.24025974 0.24350649 0.25324675 0.25 0.25324675 0.26623377 0.32792208 0.33116883 0.2792208 0.3474026 0.3538961 0.30194804 0.33441558 0.32792208 0.3181818 0.29545453 0.29545453 0.26623377 0.2792208 0.26948053 0.30844155 0.26298702 0.29545453 0.20779221 0.25 0.20779221 0.22727273 0.2987013 0.2987013 0.3051948 0.3409091 0.25324675 0.27597404 0.25974026 0.27597404 0.25324675 0.29545453 0.26623377 0.3181818 0.32792208 0.28246754 0.29220778 0.26623377 0.26298702 0.2564935 0.22727273 0.26623377 0.38636363 0.3538961 0.3474026 0.32142857 0.34415585 0.40584415 0.36363637 0.36688313 0.32792208 0.36363637 0.37012988 0.37012988 0.34415585 0.34415585 0.38636363 0.3538961 0.077922076 0.10714286 0.064935066 0.11038961 0.09415584 0.09415584 0.14935064 0.0 0.20779221 0.22727273 0.42207792 0.39935064 0.35064936 0.22077923 0.22077923 0.24675325 0.22402598 0.24025974 0.24025974 0.32142857 0.32142857 0.32792208 0.22727273 0.21428572 0.26948053 0.24675325 0.24675325 0.3051948 0.25 0.22727273 0.24350649 0.33116883 0.22727273 0.23701298 0.25324675 0.32792208 0.35714287 0.30194804 0.28246754 0.2564935 0.25324675 0.28896105 0.22077923 0.20454545 0.23051947 0.27597404 0.2564935 0.36038962
[73] 'ST72-IV-USA700'           0.23376623 0.23701298 0.22077923 0.2564935 0.27272728 0.27272728 0.27597404 0.24675325 0.20454545 0.16558442 0.22402598 0.23051947 0.16883117 0.2012987 0.20779221 0.18831168 0.17857143 0.17207792 0.17532468 0.17532468 0.14610389 0.16883117 0.15584415 0.18181819 0.23051947 0.24350649 0.19480519 0.21753247 0.23701298 0.25324675 0.21753247 0.25974026 0.17857143 0.19480519 0.18506494 0.2012987 0.22402598 0.20454545 0.23051947 0.2792208 0.2564935 0.19805194 0.23376623 0.20779221 0.16558442 0.25 0.20779221 0.17532468 0.2857143 0.28246754 0.26298702 0.27597404 0.2792208 0.38311687 0.34415585 0.32792208 0.3409091 0.36038962 0.35064936 0.38636363 0.37337664 0.36688313 0.39285713 0.38636363 0.24025974 0.23701298 0.21753247 0.27272728 0.28246754 0.24350649 0.2987013 0.20779221 0.0 0.10064935 0.40584415 0.38311687 0.34415585 0.21103896 0.22077923 0.21753247 0.20454545 0.2564935 0.23376623 0.32792208 0.32467532 0.33766234 0.14935064 0.1525974 0.20454545 0.14610389 0.24350649 0.31493506 0.23701298 0.22402598 0.24675325 0.3181818 0.2012987 0.18831168 0.23701298 0.31493506 0.37012988 0.34415585 0.31493506 0.16233766 0.17532468 0.26298702 0.19480519 0.20779221 0.23701298 0.32467532 0.27272728 0.4448052
[74] 'ST72-IV-PVL-WA44'         0.26948053 0.22727273 0.24675325 0.25 0.24350649 0.26298702 0.25324675 0.24675325 0.21753247 0.16883117 0.24675325 0.23051947 0.19480519 0.27272728 0.2012987 0.21753247 0.19480519 0.21103896 0.18831168 0.18181819 0.16233766 0.23051947 0.15584415 0.17207792 0.23376623 0.23701298 0.20454545 0.22727273 0.2857143 0.29545453 0.28246754 0.28896105 0.22727273 0.25974026 0.24025974 0.25324675 0.21428572 0.23051947 0.24350649 0.28246754 0.30844155 0.23376623 0.25324675 0.24350649 0.19155844 0.25324675 0.21103896 0.17857143 0.3181818 0.3051948 0.26298702 0.25974026 0.25 0.3961039 0.34415585 0.35064936 0.32142857 0.36688313 0.39285713 0.35714287 0.37662336 0.38311687 0.42857143 0.39935064 0.22402598 0.23376623 0.21103896 0.25974026 0.26298702 0.23701298 0.29220778 0.22727273 0.10064935 0.0 0.42207792 0.42532468 0.36363637 0.25324675 0.24025974 0.23701298 0.22727273 0.23051947 0.22077923 0.33116883 0.32142857 0.33441558 0.1590909 0.14610389 0.19480519 0.17532468 0.24350649 0.31493506 0.24025974 0.22402598 0.22727273 0.37662336 0.23051947 0.21428572 0.24025974 0.3409091 0.4090909 0.3409091 0.3181818 0.17207792 0.20779221 0.25 0.18831168 0.21753247 0.24350649 0.32142857 0.27597404 0.43506494
[75] 'CC75-IV'                  0.4707792 0.44805196 0.4642857 0.4642857 0.49025974 0.49675325 0.5 0.47402596 0.45454547 0.40584415 0.46103895 0.48051947 0.4383117 0.45779222 0.43506494 0.43506494 0.4090909 0.42857143 0.4025974 0.4318182 0.38961038 0.4383117 0.4025974 0.39935064 0.42857143 0.48701298 0.3961039 0.42207792 0.4642857 0.48376623 0.49675325 0.4642857 0.45454547 0.4707792 0.47402596 0.48051947 0.4448052 0.47727272 0.4642857 0.4512987 0.48051947 0.4642857 0.512987 0.49025974 0.37662336 0.43506494 0.42207792 0.38311687 0.40584415 0.39935064 0.38311687 0.37987012 0.37987012 0.4318182 0.39935064 0.39285713 0.39285713 0.37987012 0.3961039 0.4025974 0.41233766 0.36688313 0.40584415 0.37987012 0.41883117 0.4090909 0.40584415 0.47402596 0.48376623 0.4383117 0.41558442 0.42207792 0.40584415 0.42207792 0.0 0.26948053 0.2012987 0.41883117 0.43506494 0.44155845 0.45779222 0.4707792 0.44805196 0.3051948 0.32792208 0.33766234 0.41233766 0.43506494 0.48051947 0.4512987 0.4025974 0.3538961 0.43506494 0.44155845 0.4707792 0.5584416 0.38636363 0.37987012 0.35064936 0.41883117 0.46103895 0.38636363 0.37662336 0.38636363 0.4318182 0.43506494 0.42532468 0.41558442 0.43506494 0.4448052 0.46103895 0.46103895
[76] 'ST883-IV-WA47'            0.38636363 0.39935064 0.40584415 0.41558442 0.42532468 0.42207792 0.43506494 0.44155845 0.4383117 0.41233766 0.46103895 0.46103895 0.41233766 0.46103895 0.42207792 0.42857143 0.42207792 0.41233766 0.37987012 0.41883117 0.38961038 0.4318182 0.4025974 0.4090909 0.37662336 0.41558442 0.35714287 0.37987012 0.41883117 0.44155845 0.4448052 0.44155845 0.42207792 0.45454547 0.42532468 0.42857143 0.42532468 0.42857143 0.41558442 0.42857143 0.4025974 0.44155845 0.44155845 0.44155845 0.36688313 0.38311687 0.37012988 0.37337664 0.37012988 0.38636363 0.37012988 0.37337664 0.37337664 0.45454547 0.41558442 0.39935064 0.4090909 0.40584415 0.37012988 0.39285713 0.3961039 0.41233766 0.41883117 0.42857143 0.38636363 0.38961038 0.38636363 0.42207792 0.43506494 0.38636363 0.3538961 0.39935064 0.38311687 0.42532468 0.26948053 0.0 0.22402598 0.37337664 0.37987012 0.3538961 0.3538961 0.3961039 0.38636363 0.3181818 0.3181818 0.33441558 0.35714287 0.37337664 0.42532468 0.38311687 0.41883117 0.35064936 0.36688313 0.37337664 0.3961039 0.52922076 0.4090909 0.4025974 0.41233766 0.38311687 0.41233766 0.38961038 0.36038962 0.39285713 0.4090909 0.42857143 0.3538961 0.37337664 0.3961039 0.39285713 0.41558442 0.41558442
[77] 'ST1303-IV'                0.41883117 0.39935064 0.4090909 0.39285713 0.42857143 0.43506494 0.4383117 0.42857143 0.4025974 0.3538961 0.43506494 0.42207792 0.36363637 0.4448052 0.39935064 0.39935064 0.37012988 0.37662336 0.32792208 0.37337664 0.33441558 0.40584415 0.33766234 0.36688313 0.37662336 0.41558442 0.33441558 0.36038962 0.4318182 0.44805196 0.45779222 0.4707792 0.41233766 0.4448052 0.4318182 0.43506494 0.40584415 0.42207792 0.4318182 0.42857143 0.44805196 0.43506494 0.4383117 0.4318182 0.3116883 0.3538961 0.35064936 0.32467532 0.37337664 0.36363637 0.33766234 0.32792208 0.33441558 0.4025974 0.37987012 0.35714287 0.3474026 0.35714287 0.37012988 0.36363637 0.36688313 0.36688313 0.4090909 0.38636363 0.33766234 0.32142857 0.33116883 0.38636363 0.39935064 0.35064936 0.3181818 0.35064936 0.34415585 0.36363637 0.2012987 0.22402598 0.0 0.36363637 0.36688313 0.38961038 0.38311687 0.39285713 0.37337664 0.2987013 0.32467532 0.32792208 0.33441558 0.35714287 0.41558442 0.37662336 0.35064936 0.33766234 0.35714287 0.37987012 0.4025974 0.53571427 0.37012988 0.35064936 0.33441558 0.37662336 0.42532468 0.3538961 0.29545453 0.3181818 0.36038962 0.40584415 0.36363637 0.35714287 0.37987012 0.39285713 0.41233766 0.42207792
[78] 'CC80-IV'                  0.19155844 0.19480519 0.19805194 0.20779221 0.21753247 0.22402598 0.22727273 0.2564935 0.25 0.22727273 0.27597404 0.26623377 0.20779221 0.28896105 0.24675325 0.23376623 0.23376623 0.24025974 0.21753247 0.23051947 0.2012987 0.25974026 0.22727273 0.23051947 0.17207792 0.19480519 0.17532468 0.19155844 0.25324675 0.26948053 0.27597404 0.26948053 0.24675325 0.28246754 0.25324675 0.24675325 0.26298702 0.27272728 0.24025974 0.28896105 0.2987013 0.25324675 0.26948053 0.26623377 0.22402598 0.17857143 0.18831168 0.22727273 0.33766234 0.32467532 0.30194804 0.3181818 0.32792208 0.3961039 0.36038962 0.3538961 0.33116883 0.37662336 0.36688313 0.35714287 0.3538961 0.37012988 0.37987012 0.38961038 0.21103896 0.22402598 0.21428572 0.25974026 0.25974026 0.22077923 0.23701298 0.22077923 0.21103896 0.25324675 0.41883117 0.37337664 0.36363637 0.0 0.055194806 0.1590909 0.17207792 0.2012987 0.17532468 0.26298702 0.25324675 0.25974026 0.18506494 0.18506494 0.2564935 0.21753247 0.25324675 0.3474026 0.18506494 0.19805194 0.22402598 0.35064936 0.18181819 0.17857143 0.21428572 0.36363637 0.3961039 0.35064936 0.25974026 0.22402598 0.23051947 0.23376623 0.18181819 0.1396104 0.23376623 0.27272728 0.22077923 0.37337664
[79] 'CC80-IV-PVL-Europ'        0.19805194 0.18831168 0.20454545 0.20454545 0.22402598 0.23701298 0.22727273 0.26298702 0.25324675 0.23701298 0.2792208 0.28896105 0.23376623 0.2857143 0.22727273 0.24350649 0.23051947 0.23701298 0.23376623 0.23376623 0.21103896 0.24675325 0.21753247 0.23376623 0.17857143 0.22077923 0.18506494 0.20779221 0.28246754 0.27597404 0.2792208 0.27272728 0.25 0.29220778 0.24350649 0.24350649 0.25974026 0.2857143 0.24675325 0.30194804 0.2987013 0.28246754 0.27597404 0.2857143 0.24350649 0.19155844 0.19480519 0.24350649 0.35064936 0.33441558 0.30194804 0.33116883 0.33116883 0.37662336 0.3538961 0.36688313 0.33766234 0.37662336 0.37337664 0.36688313 0.3538961 0.38311687 0.37987012 0.3961039 0.18181819 0.23376623 0.21103896 0.24025974 0.24025974 0.22402598 0.24025974 0.22077923 0.22077923 0.24025974 0.43506494 0.37987012 0.36688313 0.055194806 0.0 0.17207792 0.16558442 0.20779221 0.19480519 0.27597404 0.26298702 0.29545453 0.18506494 0.19805194 0.2792208 0.23376623 0.27597404 0.35064936 0.18506494 0.21103896 0.24675325 0.37662336 0.2012987 0.18831168 0.22402598 0.37337664 0.4025974 0.35064936 0.26623377 0.23701298 0.22727273 0.25 0.19805194 0.14935064 0.24350649 0.28896105 0.2012987 0.39285713
[80] 'CC88-IV-WA2'              0.14610389 0.14935064 0.16233766 0.2012987 0.20779221 0.20779221 0.22402598 0.26298702 0.25 0.22727273 0.23701298 0.26623377 0.23376623 0.27597404 0.23701298 0.22402598 0.23376623 0.2564935 0.23376623 0.21753247 0.20779221 0.26298702 0.23376623 0.21103896 0.20779221 0.21753247 0.19805194 0.21428572 0.26623377 0.2564935 0.25974026 0.22402598 0.21428572 0.25974026 0.24675325 0.25324675 0.25974026 0.26623377 0.22402598 0.2987013 0.27597404 0.24350649 0.2564935 0.25974026 0.23051947 0.23376623 0.20454545 0.21753247 0.32142857 0.33441558 0.2987013 0.32142857 0.33441558 0.37337664 0.32792208 0.36688313 0.3409091 0.37662336 0.33766234 0.37662336 0.3538961 0.37662336 0.37337664 0.38961038 0.23376623 0.26298702 0.24675325 0.2792208 0.2792208 0.24675325 0.27272728 0.24675325 0.21753247 0.23701298 0.44155845 0.3538961 0.38961038 0.1590909 0.17207792 0.0 0.06818182 0.12662338 0.09090909 0.29220778 0.26298702 0.28246754 0.19805194 0.20779221 0.27597404 0.22402598 0.26623377 0.38311687 0.2012987 0.18181819 0.21428572 0.3051948 0.22402598 0.22077923 0.26623377 0.3409091 0.37012988 0.36363637 0.29545453 0.22727273 0.24350649 0.26623377 0.18831168 0.17532468 0.25 0.26298702 0.19805194 0.37337664
[81] 'CC88-IV-PVL'              0.1525974 0.1525974 0.15584415 0.18831168 0.19480519 0.2012987 0.21103896 0.2792208 0.24675325 0.24350649 0.26623377 0.26623377 0.23051947 0.27597404 0.24350649 0.25324675 0.23051947 0.24675325 0.24675325 0.21428572 0.22077923 0.26298702 0.24025974 0.23376623 0.21428572 0.20779221 0.19155844 0.21753247 0.2564935 0.25 0.2564935 0.27597404 0.23376623 0.2564935 0.21103896 0.22727273 0.23701298 0.24675325 0.23701298 0.32792208 0.2857143 0.24350649 0.24025974 0.23701298 0.23051947 0.24025974 0.20779221 0.22077923 0.33116883 0.3474026 0.29545453 0.32792208 0.33116883 0.3961039 0.33441558 0.3538961 0.33116883 0.39935064 0.35064936 0.37662336 0.34415585 0.37662336 0.39285713 0.3961039 0.19805194 0.24025974 0.24025974 0.23051947 0.24675325 0.24025974 0.25324675 0.22402598 0.20454545 0.22727273 0.45779222 0.3538961 0.38311687 0.17207792 0.16558442 0.06818182 0.0 0.116883114 0.10064935 0.29545453 0.2564935 0.28896105 0.2012987 0.22077923 0.2792208 0.22727273 0.27272728 0.36688313 0.17207792 0.18831168 0.21103896 0.3116883 0.22727273 0.23051947 0.26623377 0.34415585 0.36688313 0.3538961 0.2987013 0.23051947 0.23701298 0.26948053 0.18831168 0.17857143 0.24025974 0.26948053 0.21103896 0.3538961
[82] 'CC88-V-PVL'               0.21103896 0.18831168 0.19805194 0.18506494 0.12662338 0.1525974 0.13636364 0.2792208 0.26298702 0.23376623 0.3116883 0.27597404 0.24350649 0.32467532 0.25974026 0.24350649 0.20454545 0.26298702 0.23051947 0.24025974 0.20454545 0.30844155 0.25 0.22727273 0.24350649 0.18506494 0.21753247 0.19805194 0.30194804 0.29545453 0.3051948 0.32142857 0.2564935 0.29545453 0.28246754 0.2857143 0.21753247 0.26948053 0.24350649 0.32142857 0.34415585 0.26623377 0.25974026 0.25 0.2564935 0.21428572 0.21428572 0.20779221 0.37987012 0.34415585 0.29545453 0.29545453 0.29220778 0.41558442 0.3538961 0.36688313 0.2792208 0.4090909 0.42207792 0.38311687 0.36038962 0.3961039 0.4025974 0.4025974 0.22727273 0.24350649 0.23376623 0.27597404 0.24350649 0.22402598 0.23376623 0.24025974 0.2564935 0.23051947 0.4707792 0.3961039 0.39285713 0.2012987 0.20779221 0.12662338 0.116883114 0.0 0.077922076 0.30194804 0.26948053 0.25 0.24025974 0.18181819 0.24350649 0.23376623 0.24350649 0.33766234 0.22077923 0.19480519 0.1525974 0.3474026 0.24675325 0.20779221 0.26623377 0.37987012 0.38636363 0.32792208 0.2564935 0.21753247 0.24675325 0.24350649 0.22402598 0.18831168 0.2564935 0.26948053 0.23051947 0.36688313
[83] 'CC88-VI'                  0.2012987 0.17532468 0.17532468 0.18181819 0.16883117 0.17532468 0.17857143 0.26623377 0.24350649 0.22402598 0.28896105 0.23376623 0.21753247 0.32467532 0.26298702 0.25324675 0.22402598 0.24025974 0.22077923 0.21103896 0.20454545 0.28896105 0.23376623 0.22727273 0.21428572 0.17857143 0.19480519 0.2012987 0.29220778 0.2792208 0.2857143 0.29545453 0.24350649 0.28896105 0.27597404 0.28246754 0.24025974 0.24675325 0.24675325 0.28896105 0.3116883 0.23376623 0.2564935 0.25 0.23051947 0.20454545 0.2012987 0.19805194 0.37012988 0.32792208 0.30844155 0.30194804 0.3181818 0.39935064 0.3538961 0.36363637 0.30844155 0.39285713 0.39935064 0.36038962 0.36363637 0.37987012 0.38961038 0.38636363 0.23051947 0.23376623 0.23701298 0.27597404 0.2564935 0.24025974 0.26298702 0.24025974 0.23376623 0.22077923 0.44805196 0.38636363 0.37337664 0.17532468 0.19480519 0.09090909 0.10064935 0.077922076 0.0 0.2857143 0.2792208 0.26298702 0.20779221 0.17532468 0.22077923 0.22077923 0.23376623 0.36038962 0.2012987 0.17207792 0.16558442 0.33441558 0.22727273 0.20454545 0.23701298 0.37337664 0.4025974 0.3474026 0.27272728 0.19480519 0.24675325 0.24025974 0.18831168 0.16558442 0.23376623 0.25 0.22402598 0.37012988
[84] 'ST93-IV'                  0.31493506 0.29545453 0.3051948 0.3116883 0.31493506 0.32142857 0.32467532 0.3961039 0.38636363 0.34415585 0.4318182 0.41883117 0.37012988 0.4318182 0.37337664 0.39285713 0.37662336 0.37337664 0.3051948 0.35714287 0.33116883 0.38961038 0.33116883 0.35714287 0.2857143 0.33116883 0.23376623 0.2564935 0.3409091 0.37337664 0.38636363 0.37662336 0.33766234 0.37337664 0.3474026 0.32467532 0.32792208 0.3538961 0.35064936 0.3474026 0.38636363 0.35714287 0.37012988 0.35714287 0.28246754 0.24350649 0.24675325 0.2987013 0.35714287 0.3409091 0.32467532 0.30194804 0.3051948 0.33766234 0.30844155 0.28246754 0.26298702 0.30844155 0.32467532 0.30844155 0.3051948 0.29545453 0.36363637 0.32792208 0.31493506 0.3051948 0.2987013 0.37987012 0.38636363 0.32792208 0.28896105 0.32142857 0.32792208 0.33116883 0.3051948 0.3181818 0.2987013 0.26298702 0.27597404 0.29220778 0.29545453 0.30194804 0.2857143 0.0 0.09415584 0.09415584 0.26623377 0.2857143 0.3538961 0.32467532 0.27597404 0.26623377 0.28246754 0.27597404 0.28896105 0.4383117 0.27272728 0.27272728 0.2792208 0.2987013 0.37337664 0.2792208 0.22727273 0.3051948 0.35714287 0.33116883 0.27272728 0.23376623 0.3116883 0.30844155 0.32142857 0.3051948
[85] 'ST93-IV-PVL-Queen'        0.3116883 0.27597404 0.29545453 0.29545453 0.29545453 0.30844155 0.3116883 0.41233766 0.38311687 0.3409091 0.41233766 0.4090909 0.35714287 0.4318182 0.37012988 0.37662336 0.35064936 0.37662336 0.32467532 0.35064936 0.33116883 0.4025974 0.33441558 0.36038962 0.2987013 0.33766234 0.25 0.27597404 0.35714287 0.37337664 0.38636363 0.37012988 0.3181818 0.37662336 0.33766234 0.3409091 0.3116883 0.3538961 0.33766234 0.35714287 0.37987012 0.35064936 0.37987012 0.36038962 0.26948053 0.27272728 0.26623377 0.30194804 0.3474026 0.33766234 0.2987013 0.30844155 0.2987013 0.32792208 0.28246754 0.29545453 0.25974026 0.3051948 0.3116883 0.32467532 0.2987013 0.3051948 0.3538961 0.3181818 0.31493506 0.31493506 0.31493506 0.3538961 0.37012988 0.33116883 0.28896105 0.32142857 0.32467532 0.32142857 0.32792208 0.3181818 0.32467532 0.25324675 0.26298702 0.26298702 0.2564935 0.26948053 0.2792208 0.09415584 0.0 0.042207792 0.27272728 0.29545453 0.35064936 0.3181818 0.2857143 0.26623377 0.27272728 0.25974026 0.28246754 0.41558442 0.27597404 0.27597404 0.28896105 0.2857143 0.36363637 0.2564935 0.25 0.31493506 0.33766234 0.32467532 0.28896105 0.25 0.32467532 0.30194804 0.30194804 0.32467532
[86] 'ST93-V-PVL'               0.32792208 0.30844155 0.3051948 0.3116883 0.2792208 0.2857143 0.28896105 0.4025974 0.38311687 0.33441558 0.4383117 0.41233766 0.35064936 0.45454547 0.39285713 0.36363637 0.33766234 0.37012988 0.3051948 0.37012988 0.3181818 0.41883117 0.3409091 0.34415585 0.2987013 0.2987013 0.25324675 0.24025974 0.3538961 0.37987012 0.4025974 0.38961038 0.3409091 0.38636363 0.36688313 0.36038962 0.33441558 0.36038962 0.32467532 0.3538961 0.4025974 0.34415585 0.37337664 0.36038962 0.27597404 0.2564935 0.26623377 0.26623377 0.37012988 0.34415585 0.32142857 0.2792208 0.28246754 0.34415585 0.3181818 0.29545453 0.23701298 0.3181818 0.33441558 0.32792208 0.2792208 0.3181818 0.33766234 0.32142857 0.33441558 0.31493506 0.3181818 0.37662336 0.3538961 0.3116883 0.27597404 0.32792208 0.33766234 0.33441558 0.33766234 0.33441558 0.32792208 0.25974026 0.29545453 0.28246754 0.28896105 0.25 0.26298702 0.09415584 0.042207792 0.0 0.2792208 0.25974026 0.3181818 0.28896105 0.25324675 0.24675325 0.2792208 0.27272728 0.24025974 0.41558442 0.2857143 0.24675325 0.2792208 0.30194804 0.35064936 0.25 0.22077923 0.28246754 0.33116883 0.30194804 0.28896105 0.25324675 0.32142857 0.29545453 0.3051948 0.30194804
[87] 'CC97-IV-WA54'             0.24350649 0.20779221 0.21753247 0.24350649 0.24350649 0.25 0.25974026 0.25974026 0.21103896 0.19155844 0.2564935 0.24675325 0.21103896 0.26623377 0.21428572 0.22402598 0.20454545 0.20779221 0.18181819 0.18181819 0.17207792 0.23701298 0.17532468 0.19805194 0.2012987 0.23376623 0.1590909 0.18181819 0.25324675 0.26298702 0.2564935 0.24350649 0.20454545 0.24675325 0.22077923 0.21103896 0.23051947 0.22402598 0.22402598 0.24350649 0.2857143 0.23376623 0.24025974 0.23051947 0.18506494 0.17857143 0.16883117 0.17207792 0.3051948 0.30844155 0.28896105 0.27272728 0.28896105 0.3961039 0.36038962 0.36688313 0.3538961 0.38311687 0.38311687 0.37662336 0.37012988 0.39935064 0.42532468 0.41233766 0.22727273 0.22727273 0.21753247 0.28246754 0.28246754 0.24675325 0.25974026 0.22727273 0.14935064 0.1590909 0.41233766 0.35714287 0.33441558 0.18506494 0.18506494 0.19805194 0.2012987 0.24025974 0.20779221 0.26623377 0.27272728 0.2792208 0.0 0.08766234 0.16558442 0.11363637 0.26948053 0.29545453 0.19805194 0.19480519 0.22727273 0.36688313 0.22727273 0.21753247 0.24025974 0.3051948 0.37012988 0.2987013 0.28246754 0.18831168 0.23376623 0.2012987 0.14610389 0.17532468 0.23701298 0.29545453 0.24675325 0.39935064
[88] 'CC97-V'                   0.23376623 0.22077923 0.22402598 0.23701298 0.20779221 0.21428572 0.21753247 0.24675325 0.23701298 0.18181819 0.2792208 0.26623377 0.19480519 0.2987013 0.24675325 0.19805194 0.18831168 0.22402598 0.17207792 0.21103896 0.16883117 0.2564935 0.18506494 0.17857143 0.19805194 0.18831168 0.15584415 0.14285715 0.24025974 0.25 0.26623377 0.25974026 0.21428572 0.24675325 0.22077923 0.23376623 0.22727273 0.23376623 0.18506494 0.24675325 0.29220778 0.22077923 0.22727273 0.23051947 0.19805194 0.16233766 0.16883117 0.14935064 0.3409091 0.3181818 0.30194804 0.26623377 0.26948053 0.43506494 0.39935064 0.37987012 0.3116883 0.39285713 0.40584415 0.38961038 0.3538961 0.41558442 0.41883117 0.42532468 0.21428572 0.22077923 0.20779221 0.27597404 0.23051947 0.19480519 0.23376623 0.21428572 0.1525974 0.14610389 0.43506494 0.37337664 0.35714287 0.18506494 0.19805194 0.20779221 0.22077923 0.18181819 0.17532468 0.2857143 0.29545453 0.25974026 0.08766234 0.0 0.116883114 0.077922076 0.23701298 0.25974026 0.21103896 0.20779221 0.19480519 0.34415585 0.24675325 0.19480519 0.25324675 0.3181818 0.3409091 0.27597404 0.26623377 0.17207792 0.21753247 0.20779221 0.1525974 0.17857143 0.23051947 0.28246754 0.23701298 0.38311687
[89] 'CC97-V-ACME'              0.29545453 0.2792208 0.26948053 0.28246754 0.24675325 0.25 0.2564935 0.2987013 0.26948053 0.23051947 0.32142857 0.25324675 0.26298702 0.34415585 0.28896105 0.2564935 0.23051947 0.25324675 0.24025974 0.24350649 0.22727273 0.30194804 0.22402598 0.24350649 0.27597404 0.21103896 0.21753247 0.20779221 0.3051948 0.31493506 0.30194804 0.3051948 0.25324675 0.29220778 0.26623377 0.30844155 0.23051947 0.2564935 0.24025974 0.2987013 0.34415585 0.24025974 0.28896105 0.26623377 0.24675325 0.26948053 0.23376623 0.2012987 0.3961039 0.30194804 0.33116883 0.3116883 0.3051948 0.47727272 0.42532468 0.42857143 0.37012988 0.4512987 0.4642857 0.39935064 0.41558442 0.44155845 0.4383117 0.41558442 0.2857143 0.25974026 0.26948053 0.3116883 0.27272728 0.26298702 0.31493506 0.26948053 0.20454545 0.19480519 0.48051947 0.42532468 0.41558442 0.2564935 0.2792208 0.27597404 0.2792208 0.24350649 0.22077923 0.3538961 0.35064936 0.3181818 0.16558442 0.116883114 0.0 0.12012987 0.29545453 0.3181818 0.2792208 0.25 0.2012987 0.37012988 0.2987013 0.25974026 0.3116883 0.36688313 0.4025974 0.33116883 0.33116883 0.24350649 0.29220778 0.23376623 0.22077923 0.25324675 0.23701298 0.2857143 0.3051948 0.4448052
[90] 'CC97-I-V'                 0.25 0.24350649 0.21753247 0.25 0.23701298 0.22402598 0.23701298 0.26623377 0.24675325 0.2012987 0.2987013 0.2792208 0.20779221 0.29545453 0.2564935 0.22402598 0.19805194 0.23376623 0.19480519 0.22077923 0.18506494 0.26948053 0.19805194 0.21753247 0.23701298 0.19480519 0.18181819 0.16883117 0.24675325 0.2564935 0.25974026 0.25974026 0.22077923 0.24025974 0.24350649 0.26298702 0.23376623 0.23376623 0.21103896 0.27597404 0.29220778 0.22727273 0.23376623 0.22077923 0.21428572 0.22402598 0.18831168 0.16233766 0.34415585 0.33116883 0.3051948 0.27597404 0.2792208 0.45454547 0.4025974 0.3961039 0.3538961 0.42207792 0.42532468 0.42207792 0.38311687 0.42207792 0.41558442 0.42532468 0.26298702 0.24350649 0.24350649 0.2792208 0.25 0.21753247 0.2792208 0.24675325 0.14610389 0.17532468 0.4512987 0.38311687 0.37662336 0.21753247 0.23376623 0.22402598 0.22727273 0.23376623 0.22077923 0.32467532 0.3181818 0.28896105 0.11363637 0.077922076 0.12012987 0.0 0.26623377 0.27272728 0.22077923 0.21753247 0.20779221 0.32467532 0.27272728 0.22402598 0.28246754 0.31493506 0.33766234 0.3051948 0.3051948 0.2012987 0.24025974 0.22727273 0.19155844 0.22727273 0.23376623 0.3116883 0.26623377 0.41883117
[91] 'CC121-V-WA22'             0.2987013 0.27272728 0.26623377 0.2792208 0.25 0.2564935 0.25974026 0.3181818 0.28246754 0.24025974 0.33116883 0.30194804 0.25 0.35064936 0.29220778 0.26623377 0.24025974 0.26948053 0.24350649 0.25324675 0.21753247 0.31493506 0.24350649 0.23376623 0.25974026 0.23701298 0.22727273 0.21428572 0.3116883 0.30844155 0.32142857 0.32467532 0.26948053 0.30844155 0.2987013 0.2987013 0.26623377 0.26948053 0.26298702 0.28896105 0.33116883 0.27272728 0.29220778 0.27597404 0.23376623 0.21103896 0.20779221 0.21753247 0.38636363 0.35714287 0.3409091 0.30844155 0.3051948 0.36363637 0.3409091 0.32467532 0.25974026 0.33441558 0.36038962 0.32467532 0.3051948 0.30844155 0.32142857 0.32142857 0.24350649 0.23376623 0.23376623 0.3051948 0.26623377 0.23376623 0.23376623 0.24675325 0.24350649 0.24350649 0.4025974 0.41883117 0.35064936 0.25324675 0.27597404 0.26623377 0.27272728 0.24350649 0.23376623 0.27597404 0.2857143 0.25324675 0.26948053 0.23701298 0.29545453 0.26623377 0.0 0.30194804 0.28246754 0.23376623 0.21428572 0.3409091 0.24025974 0.17857143 0.22402598 0.3538961 0.38311687 0.30194804 0.2564935 0.19805194 0.2564935 0.30194804 0.27272728 0.23376623 0.27272728 0.28896105 0.2792208 0.34415585
[92] 'CC152-V-PVL'              0.35714287 0.3474026 0.3538961 0.35064936 0.33116883 0.35064936 0.3409091 0.41883117 0.41558442 0.36038962 0.45454547 0.4448052 0.37012988 0.45779222 0.40584415 0.37987012 0.3538961 0.36688313 0.3181818 0.38636363 0.33766234 0.41558442 0.36363637 0.36038962 0.32792208 0.33766234 0.2987013 0.2792208 0.3116883 0.37662336 0.39285713 0.4025974 0.3409091 0.36038962 0.33116883 0.33116883 0.31493506 0.33116883 0.31493506 0.32467532 0.3538961 0.32467532 0.3538961 0.3474026 0.32142857 0.3051948 0.30844155 0.3116883 0.36038962 0.37662336 0.3409091 0.30844155 0.2857143 0.41558442 0.37337664 0.34415585 0.28896105 0.36363637 0.36688313 0.37662336 0.3409091 0.35714287 0.35714287 0.36688313 0.29545453 0.28896105 0.2857143 0.33766234 0.30194804 0.2792208 0.25 0.3051948 0.31493506 0.31493506 0.3538961 0.35064936 0.33766234 0.3474026 0.35064936 0.38311687 0.36688313 0.33766234 0.36038962 0.26623377 0.26623377 0.24675325 0.29545453 0.25974026 0.3181818 0.27272728 0.30194804 0.0 0.32467532 0.32467532 0.30844155 0.4383117 0.36688313 0.3116883 0.33441558 0.28246754 0.3116883 0.23051947 0.3116883 0.30844155 0.33441558 0.33441558 0.34415585 0.32792208 0.3474026 0.32792208 0.37987012 0.36363637
[93] 'ST154-PVL'                0.20779221 0.18181819 0.20779221 0.19805194 0.22402598 0.24350649 0.23376623 0.3116883 0.2987013 0.25 0.32142857 0.31493506 0.2564935 0.33441558 0.2857143 0.28896105 0.24675325 0.25 0.23376623 0.26298702 0.24025974 0.28896105 0.24025974 0.27272728 0.2012987 0.24675325 0.2012987 0.21753247 0.28896105 0.29220778 0.2987013 0.3051948 0.25974026 0.27272728 0.2564935 0.26298702 0.25974026 0.26623377 0.26948053 0.30844155 0.30194804 0.24350649 0.25324675 0.24350649 0.24350649 0.23701298 0.22727273 0.20454545 0.3538961 0.38636363 0.35064936 0.3409091 0.33766234 0.39935064 0.3538961 0.32792208 0.32467532 0.39935064 0.38636363 0.4025974 0.38961038 0.37987012 0.41883117 0.41558442 0.23701298 0.22727273 0.23701298 0.27272728 0.27597404 0.25 0.24675325 0.25 0.23701298 0.24025974 0.43506494 0.36688313 0.35714287 0.18506494 0.18506494 0.2012987 0.17207792 0.22077923 0.2012987 0.28246754 0.27272728 0.2792208 0.19805194 0.21103896 0.2792208 0.22077923 0.28246754 0.32467532 0.0 0.19805194 0.22077923 0.3409091 0.21753247 0.21103896 0.23701298 0.3474026 0.4025974 0.3409091 0.2987013 0.23701298 0.26948053 0.25324675 0.17532468 0.18506494 0.24350649 0.3181818 0.24350649 0.38311687
[94] 'ST188-IV-WA38'            0.18831168 0.1590909 0.16233766 0.17532468 0.17207792 0.17857143 0.18831168 0.30194804 0.2987013 0.2564935 0.33116883 0.2857143 0.26623377 0.32467532 0.28896105 0.29220778 0.25324675 0.2792208 0.24675325 0.24025974 0.21753247 0.3116883 0.25 0.25 0.18506494 0.17207792 0.14935064 0.16233766 0.2987013 0.28246754 0.27597404 0.26948053 0.23376623 0.26948053 0.26623377 0.26948053 0.23051947 0.25324675 0.25324675 0.2792208 0.26948053 0.25324675 0.2564935 0.23701298 0.21103896 0.20779221 0.17207792 0.21428572 0.38961038 0.35714287 0.34415585 0.3409091 0.3474026 0.4025974 0.3474026 0.3474026 0.32467532 0.36363637 0.37987012 0.35064936 0.36688313 0.38636363 0.41558442 0.39285713 0.24350649 0.21103896 0.22077923 0.25 0.25324675 0.23701298 0.25 0.22727273 0.22402598 0.22402598 0.44155845 0.37337664 0.37987012 0.19805194 0.21103896 0.18181819 0.18831168 0.19480519 0.17207792 0.27597404 0.25974026 0.27272728 0.19480519 0.20779221 0.25 0.21753247 0.23376623 0.32467532 0.19805194 0.0 0.10064935 0.32142857 0.19805194 0.19155844 0.25324675 0.33441558 0.39935064 0.33441558 0.29545453 0.2564935 0.2987013 0.24350649 0.18181819 0.17857143 0.21103896 0.20454545 0.23051947 0.38636363
[95] 'ST188-V'                  0.21103896 0.19155844 0.18181819 0.18831168 0.12987013 0.13636364 0.1396104 0.32142857 0.2987013 0.26623377 0.35714287 0.29220778 0.2792208 0.37662336 0.31493506 0.28896105 0.25 0.28896105 0.25 0.25974026 0.24025974 0.35064936 0.27272728 0.26623377 0.21753247 0.11363637 0.17207792 0.1590909 0.30844155 0.3051948 0.3051948 0.3181818 0.24025974 0.2987013 0.29220778 0.2987013 0.22077923 0.23376623 0.24025974 0.3116883 0.33116883 0.25 0.2792208 0.25974026 0.24675325 0.21103896 0.19805194 0.20779221 0.39935064 0.34415585 0.3181818 0.3051948 0.30844155 0.41233766 0.36363637 0.36363637 0.28896105 0.37662336 0.4025974 0.36363637 0.3474026 0.38636363 0.3961039 0.38636363 0.2564935 0.24025974 0.24025974 0.26298702 0.24350649 0.23376623 0.25 0.24350649 0.24675325 0.22727273 0.4707792 0.3961039 0.4025974 0.22402598 0.24675325 0.21428572 0.21103896 0.1525974 0.16558442 0.28896105 0.28246754 0.24025974 0.22727273 0.19480519 0.2012987 0.20779221 0.21428572 0.30844155 0.22077923 0.10064935 0.0 0.33441558 0.23701298 0.18831168 0.2564935 0.35714287 0.38961038 0.32142857 0.2564935 0.24025974 0.28896105 0.23701298 0.21103896 0.19480519 0.21103896 0.19480519 0.23376623 0.36688313
[96] 'ST239-III'                0.2792208 0.30194804 0.26948053 0.33116883 0.30844155 0.29545453 0.3181818 0.35714287 0.37012988 0.36363637 0.36363637 0.4025974 0.33441558 0.3409091 0.39935064 0.3538961 0.38636363 0.37662336 0.37012988 0.35714287 0.37337664 0.36688313 0.38636363 0.38311687 0.3409091 0.33116883 0.33441558 0.33116883 0.24675325 0.19805194 0.21103896 0.21103896 0.22077923 0.19155844 0.23051947 0.23051947 0.29545453 0.26948053 0.22402598 0.2857143 0.25324675 0.21428572 0.20779221 0.2012987 0.38636363 0.33441558 0.3116883 0.37337664 0.44155845 0.4448052 0.4448052 0.44805196 0.4448052 0.44805196 0.44805196 0.44805196 0.42857143 0.46103895 0.4318182 0.48376623 0.45779222 0.46103895 0.45779222 0.4512987 0.35064936 0.3409091 0.35064936 0.35714287 0.36038962 0.33766234 0.38311687 0.33116883 0.3181818 0.37662336 0.5584416 0.52922076 0.53571427 0.35064936 0.37662336 0.3051948 0.3116883 0.3474026 0.33441558 0.4383117 0.41558442 0.41558442 0.36688313 0.34415585 0.37012988 0.32467532 0.3409091 0.4383117 0.3409091 0.32142857 0.33441558 0.0 0.3181818 0.33116883 0.35714287 0.38636363 0.38311687 0.39935064 0.39285713 0.36688313 0.39935064 0.37012988 0.3538961 0.3474026 0.30194804 0.37662336 0.32792208 0.46753246
[97] 'CC361-IV-WA29'            0.24350649 0.23051947 0.23051947 0.24675325 0.2564935 0.26298702 0.26623377 0.24675325 0.25974026 0.24350649 0.2987013 0.2987013 0.2564935 0.27272728 0.26948053 0.27272728 0.25324675 0.25974026 0.23376623 0.22402598 0.22402598 0.26623377 0.23701298 0.25324675 0.22402598 0.26623377 0.20454545 0.22402598 0.2857143 0.26948053 0.26948053 0.2792208 0.24350649 0.27272728 0.26623377 0.24675325 0.24350649 0.25974026 0.26298702 0.30194804 0.31493506 0.25 0.26623377 0.24350649 0.23376623 0.24350649 0.23051947 0.20779221 0.34415585 0.33116883 0.32467532 0.32792208 0.32467532 0.37337664 0.34415585 0.34415585 0.33116883 0.35714287 0.36363637 0.35714287 0.3538961 0.34415585 0.38961038 0.37662336 0.24350649 0.23376623 0.22727273 0.28896105 0.2857143 0.26298702 0.29545453 0.22727273 0.2012987 0.23051947 0.38636363 0.4090909 0.37012988 0.18181819 0.2012987 0.22402598 0.22727273 0.24675325 0.22727273 0.27272728 0.27597404 0.2857143 0.22727273 0.24675325 0.2987013 0.27272728 0.24025974 0.36688313 0.21753247 0.19805194 0.23701298 0.3181818 0.0 0.10064935 0.14935064 0.3538961 0.41233766 0.35064936 0.28896105 0.22402598 0.25 0.2857143 0.19805194 0.18506494 0.25324675 0.31493506 0.24025974 0.4090909
[98] 'CC361-V'                  0.23376623 0.21428572 0.21753247 0.23701298 0.21103896 0.21753247 0.21103896 0.2792208 0.25324675 0.2012987 0.30194804 0.2792208 0.22077923 0.30844155 0.26948053 0.22077923 0.2012987 0.22727273 0.19805194 0.23051947 0.17857143 0.27272728 0.21103896 0.20454545 0.23376623 0.21753247 0.18506494 0.16558442 0.27272728 0.26948053 0.3051948 0.2987013 0.24350649 0.2792208 0.2564935 0.26298702 0.23701298 0.26948053 0.22402598 0.27597404 0.3051948 0.25324675 0.2564935 0.25974026 0.20454545 0.22402598 0.23051947 0.14935064 0.33766234 0.30844155 0.3051948 0.2564935 0.26298702 0.38311687 0.35064936 0.33441558 0.28246754 0.33766234 0.36038962 0.35064936 0.3116883 0.33116883 0.3409091 0.3409091 0.24675325 0.24025974 0.22727273 0.29220778 0.25324675 0.23701298 0.25324675 0.23701298 0.18831168 0.21428572 0.37987012 0.4025974 0.35064936 0.17857143 0.18831168 0.22077923 0.23051947 0.20779221 0.20454545 0.27272728 0.27597404 0.24675325 0.21753247 0.19480519 0.25974026 0.22402598 0.17857143 0.3116883 0.21103896 0.19155844 0.18831168 0.33116883 0.10064935 0.0 0.10064935 0.36038962 0.39285713 0.3181818 0.23701298 0.14935064 0.19155844 0.27597404 0.18831168 0.16883117 0.24350649 0.29545453 0.23051947 0.39935064
[99] 'CC361-VIII-WA28'          0.2857143 0.26623377 0.26298702 0.27272728 0.27272728 0.2792208 0.27272728 0.3051948 0.28246754 0.23376623 0.31493506 0.29545453 0.24350649 0.34415585 0.29220778 0.2792208 0.2564935 0.25 0.21428572 0.26623377 0.23701298 0.29545453 0.23376623 0.2564935 0.23701298 0.27597404 0.21753247 0.22402598 0.30844155 0.31493506 0.3409091 0.34415585 0.28246754 0.3181818 0.2987013 0.29545453 0.26948053 0.30844155 0.2857143 0.2792208 0.33116883 0.2857143 0.2987013 0.30844155 0.24675325 0.22727273 0.26298702 0.2012987 0.3538961 0.33116883 0.3116883 0.28896105 0.28896105 0.37662336 0.36363637 0.3474026 0.31493506 0.32142857 0.36688313 0.33766234 0.33441558 0.32792208 0.36363637 0.3538961 0.25 0.25324675 0.23051947 0.30844155 0.28246754 0.25324675 0.2564935 0.25324675 0.23701298 0.24025974 0.35064936 0.41233766 0.33441558 0.21428572 0.22402598 0.26623377 0.26623377 0.26623377 0.23701298 0.2792208 0.28896105 0.2792208 0.24025974 0.25324675 0.3116883 0.28246754 0.22402598 0.33441558 0.23701298 0.25324675 0.2564935 0.35714287 0.14935064 0.10064935 0.0 0.36363637 0.41233766 0.32467532 0.25 0.21753247 0.25974026 0.3051948 0.23701298 0.18181819 0.25974026 0.33116883 0.27597404 0.4025974
[100] 'CC398-IV'                 0.36688313 0.37987012 0.35714287 0.39285713 0.39285713 0.39285713 0.4090909 0.40584415 0.41233766 0.38636363 0.42207792 0.42532468 0.37662336 0.42207792 0.38961038 0.3961039 0.38961038 0.39285713 0.35064936 0.37662336 0.36363637 0.4025974 0.36038962 0.38961038 0.38636363 0.38311687 0.32467532 0.3409091 0.32467532 0.36038962 0.3538961 0.3474026 0.30844155 0.3409091 0.33441558 0.33441558 0.3409091 0.33766234 0.33441558 0.36038962 0.36038962 0.32142857 0.3409091 0.33441558 0.31493506 0.36363637 0.3409091 0.3409091 0.29545453 0.31493506 0.29220778 0.3051948 0.3051948 0.29545453 0.2792208 0.25 0.26948053 0.25974026 0.23376623 0.26948053 0.27272728 0.2564935 0.26948053 0.26948053 0.30844155 0.2857143 0.31493506 0.3474026 0.36688313 0.33116883 0.31493506 0.32792208 0.31493506 0.3409091 0.41883117 0.38311687 0.37662336 0.36363637 0.37337664 0.3409091 0.34415585 0.37987012 0.37337664 0.2987013 0.2857143 0.30194804 0.3051948 0.3181818 0.36688313 0.31493506 0.3538961 0.28246754 0.3474026 0.33441558 0.35714287 0.38636363 0.3538961 0.36038962 0.36363637 0.0 0.10064935 0.12987013 0.29545453 0.3538961 0.36038962 0.3961039 0.35064936 0.34415585 0.32792208 0.30194804 0.37337664 0.2857143
[101] 'ST398-V'                  0.37662336 0.4090909 0.39935064 0.44155845 0.41233766 0.39935064 0.42857143 0.42207792 0.41883117 0.4090909 0.4448052 0.46753246 0.4025974 0.43506494 0.42207792 0.38636363 0.40584415 0.42857143 0.38961038 0.42532468 0.40584415 0.43506494 0.41558442 0.41233766 0.41883117 0.38961038 0.38311687 0.37012988 0.32792208 0.3474026 0.38961038 0.37337664 0.3474026 0.36688313 0.35714287 0.36038962 0.38636363 0.38961038 0.30844155 0.3961039 0.38311687 0.36363637 0.36038962 0.37337664 0.36688313 0.3961039 0.39285713 0.37337664 0.3181818 0.3538961 0.3409091 0.33766234 0.3409091 0.3474026 0.32467532 0.30194804 0.2987013 0.32467532 0.28896105 0.3116883 0.27597404 0.32142857 0.28896105 0.32792208 0.32467532 0.3409091 0.36363637 0.36363637 0.3474026 0.33116883 0.32142857 0.35714287 0.37012988 0.4090909 0.46103895 0.41233766 0.42532468 0.3961039 0.4025974 0.37012988 0.36688313 0.38636363 0.4025974 0.37337664 0.36363637 0.35064936 0.37012988 0.3409091 0.4025974 0.33766234 0.38311687 0.3116883 0.4025974 0.39935064 0.38961038 0.38311687 0.41233766 0.39285713 0.41233766 0.10064935 0.0 0.14285715 0.32792208 0.37012988 0.36038962 0.41233766 0.39935064 0.40584415 0.37987012 0.33766234 0.37662336 0.2857143
[102] 'ST398-V-PVL'              0.3961039 0.37012988 0.37662336 0.37337664 0.3409091 0.35064936 0.36038962 0.39285713 0.38311687 0.33766234 0.42207792 0.42207792 0.36038962 0.44805196 0.37337664 0.35714287 0.32142857 0.37662336 0.29545453 0.3538961 0.33116883 0.41233766 0.33766234 0.3474026 0.3538961 0.34415585 0.32142857 0.30844155 0.33441558 0.36363637 0.38636363 0.37987012 0.32792208 0.36688313 0.33766234 0.33441558 0.3116883 0.35714287 0.3051948 0.33116883 0.37012988 0.3409091 0.3538961 0.3474026 0.32792208 0.32467532 0.33766234 0.3051948 0.33766234 0.32467532 0.2987013 0.26948053 0.25974026 0.3181818 0.27272728 0.26948053 0.20779221 0.26948053 0.28246754 0.26623377 0.22402598 0.26948053 0.2792208 0.27272728 0.29545453 0.28896105 0.29545453 0.3409091 0.31493506 0.28246754 0.24350649 0.30194804 0.34415585 0.3409091 0.38636363 0.38961038 0.3538961 0.35064936 0.35064936 0.36363637 0.3538961 0.32792208 0.3474026 0.2792208 0.2564935 0.25 0.2987013 0.27597404 0.33116883 0.3051948 0.30194804 0.23051947 0.3409091 0.33441558 0.32142857 0.39935064 0.35064936 0.3181818 0.32467532 0.12987013 0.14285715 0.0 0.23701298 0.29545453 0.3181818 0.35714287 0.3538961 0.32792208 0.33766234 0.29220778 0.32792208 0.26948053
[103] 'CC509-ST207-V'            0.3051948 0.2857143 0.28896105 0.29220778 0.25324675 0.2564935 0.26298702 0.36363637 0.3409091 0.30194804 0.3961039 0.38311687 0.32792208 0.41233766 0.3474026 0.32467532 0.30194804 0.33116883 0.27597404 0.32467532 0.28896105 0.37662336 0.30194804 0.30194804 0.28896105 0.26298702 0.2564935 0.24350649 0.3538961 0.37662336 0.39935064 0.4025974 0.34415585 0.38311687 0.36688313 0.36688313 0.3181818 0.34415585 0.32792208 0.35714287 0.41558442 0.35714287 0.37337664 0.37012988 0.31493506 0.23376623 0.25324675 0.28246754 0.26948053 0.26298702 0.23376623 0.19480519 0.19155844 0.31493506 0.29545453 0.26948053 0.20779221 0.28246754 0.2987013 0.26623377 0.24025974 0.27272728 0.28896105 0.28246754 0.28246754 0.26948053 0.2792208 0.32792208 0.30844155 0.26623377 0.25974026 0.28246754 0.31493506 0.3181818 0.37662336 0.36038962 0.29545453 0.25974026 0.26623377 0.29545453 0.2987013 0.2564935 0.27272728 0.22727273 0.25 0.22077923 0.28246754 0.26623377 0.33116883 0.3051948 0.2564935 0.3116883 0.2987013 0.29545453 0.2564935 0.39285713 0.28896105 0.23701298 0.25 0.29545453 0.32792208 0.23701298 0.0 0.22402598 0.2792208 0.3051948 0.2792208 0.24675325 0.26948053 0.25974026 0.31493506 0.2857143
[104] 'ST573-V-WA10'             0.26948053 0.24025974 0.25 0.25974026 0.23701298 0.24025974 0.25 0.23376623 0.18831168 0.14285715 0.23376623 0.22077923 0.15584415 0.26298702 0.20454545 0.16883117 0.14610389 0.17857143 0.14610389 0.16558442 0.12987013 0.23051947 0.1590909 0.14935064 0.24350649 0.23376623 0.24025974 0.22727273 0.29545453 0.29220778 0.32142857 0.31493506 0.26623377 0.29220778 0.2792208 0.2857143 0.24675325 0.26298702 0.23701298 0.29220778 0.32142857 0.25974026 0.26948053 0.26623377 0.1525974 0.21428572 0.21428572 0.1396104 0.2987013 0.28246754 0.26623377 0.20779221 0.22402598 0.38311687 0.3474026 0.33116883 0.28896105 0.35064936 0.37012988 0.3474026 0.30844155 0.3538961 0.37337664 0.36363637 0.25324675 0.2564935 0.25 0.3116883 0.27597404 0.24350649 0.25974026 0.2564935 0.16233766 0.17207792 0.38636363 0.39285713 0.3181818 0.22402598 0.23701298 0.22727273 0.23051947 0.21753247 0.19480519 0.3051948 0.31493506 0.28246754 0.18831168 0.17207792 0.24350649 0.2012987 0.19805194 0.30844155 0.23701298 0.2564935 0.24025974 0.36688313 0.22402598 0.14935064 0.21753247 0.3538961 0.37012988 0.29545453 0.22402598 0.0 0.084415585 0.25 0.22402598 0.21103896 0.26948053 0.33766234 0.25974026 0.40584415
[105] 'ST772-V-PVL-Bengal'       0.28246754 0.27272728 0.28896105 0.28246754 0.25974026 0.27597404 0.27597404 0.25974026 0.22727273 0.20454545 0.24675325 0.26623377 0.2012987 0.25324675 0.22727273 0.18506494 0.17207792 0.22402598 0.20454545 0.22077923 0.19155844 0.22727273 0.21428572 0.19480519 0.25974026 0.27597404 0.29220778 0.27597404 0.3116883 0.32142857 0.32467532 0.33766234 0.2792208 0.32467532 0.27272728 0.2792208 0.28896105 0.3116883 0.26623377 0.3409091 0.3409091 0.2987013 0.2987013 0.30844155 0.21103896 0.26298702 0.27272728 0.18831168 0.3051948 0.3051948 0.26623377 0.24675325 0.25324675 0.41883117 0.36363637 0.37662336 0.33441558 0.38961038 0.35714287 0.36688313 0.32467532 0.38636363 0.37337664 0.38961038 0.25324675 0.2857143 0.27272728 0.29545453 0.26298702 0.25324675 0.26298702 0.25324675 0.17532468 0.20779221 0.4318182 0.4090909 0.36038962 0.23051947 0.22727273 0.24350649 0.23701298 0.24675325 0.24675325 0.35714287 0.33766234 0.33116883 0.23376623 0.21753247 0.29220778 0.24025974 0.2564935 0.33441558 0.26948053 0.2987013 0.28896105 0.39935064 0.25 0.19155844 0.25974026 0.36038962 0.36038962 0.3181818 0.2792208 0.084415585 0.0 0.2987013 0.24350649 0.25974026 0.31493506 0.37337664 0.25 0.4090909
[106] 'ST779'                    0.2792208 0.26623377 0.23701298 0.2564935 0.23701298 0.23701298 0.24675325 0.30194804 0.26623377 0.2564935 0.3181818 0.3116883 0.27597404 0.32467532 0.26948053 0.25974026 0.23376623 0.27272728 0.26298702 0.2564935 0.24025974 0.3051948 0.2564935 0.24025974 0.27597404 0.24675325 0.25 0.24350649 0.31493506 0.30844155 0.3116883 0.2792208 0.26623377 0.3116883 0.29220778 0.29545453 0.2564935 0.29220778 0.24025974 0.30194804 0.3474026 0.25974026 0.28896105 0.27597404 0.27272728 0.26298702 0.25 0.22077923 0.38636363 0.37012988 0.3538961 0.32142857 0.33441558 0.4448052 0.4090909 0.41233766 0.36363637 0.42532468 0.4448052 0.4383117 0.4025974 0.41558442 0.42207792 0.42207792 0.29545453 0.28896105 0.2857143 0.33116883 0.3181818 0.29220778 0.30194804 0.28896105 0.26298702 0.25 0.43506494 0.42857143 0.40584415 0.23376623 0.25 0.26623377 0.26948053 0.24350649 0.24025974 0.33116883 0.32467532 0.30194804 0.2012987 0.20779221 0.23376623 0.22727273 0.30194804 0.33441558 0.25324675 0.24350649 0.23701298 0.37012988 0.2857143 0.27597404 0.3051948 0.3961039 0.41233766 0.35714287 0.3051948 0.25 0.2987013 0.0 0.23376623 0.24350649 0.29220778 0.32792208 0.28896105 0.4448052
[107] 'ST834-IV-WA13'            0.20454545 0.19155844 0.20779221 0.21428572 0.23701298 0.24350649 0.24675325 0.2857143 0.26298702 0.25 0.3116883 0.26948053 0.25 0.32142857 0.26948053 0.2792208 0.26948053 0.2857143 0.23051947 0.25 0.23051947 0.2857143 0.23701298 0.23051947 0.17857143 0.2012987 0.16233766 0.18506494 0.27597404 0.28246754 0.29545453 0.2792208 0.24675325 0.2792208 0.24025974 0.25324675 0.25324675 0.24675325 0.23701298 0.2857143 0.3051948 0.26623377 0.26298702 0.26948053 0.24350649 0.2012987 0.17532468 0.17532468 0.34415585 0.32792208 0.32467532 0.32142857 0.32467532 0.39285713 0.34415585 0.33441558 0.32792208 0.37662336 0.37337664 0.3409091 0.35064936 0.37987012 0.41233766 0.39935064 0.21103896 0.19480519 0.20779221 0.25324675 0.25974026 0.22077923 0.24025974 0.22077923 0.19480519 0.18831168 0.42532468 0.3538961 0.36363637 0.18181819 0.19805194 0.18831168 0.18831168 0.22402598 0.18831168 0.27272728 0.28896105 0.28896105 0.14610389 0.1525974 0.22077923 0.19155844 0.27272728 0.34415585 0.17532468 0.18181819 0.21103896 0.3538961 0.19805194 0.18831168 0.23701298 0.35064936 0.39935064 0.3538961 0.2792208 0.22402598 0.24350649 0.23376623 0.0 0.1590909 0.23051947 0.24675325 0.24025974 0.3409091
[108] 'CC913-IV'                 0.18506494 0.16558442 0.17207792 0.19155844 0.18831168 0.19480519 0.18506494 0.26948053 0.26623377 0.22727273 0.31493506 0.29220778 0.24675325 0.3181818 0.26298702 0.27272728 0.2564935 0.25974026 0.19480519 0.23051947 0.21753247 0.27597404 0.21753247 0.23701298 0.18506494 0.21753247 0.14935064 0.17532468 0.2857143 0.28246754 0.29220778 0.29545453 0.24675325 0.2792208 0.25324675 0.24675325 0.25974026 0.27597404 0.26298702 0.29220778 0.31493506 0.26298702 0.25324675 0.25324675 0.20454545 0.17207792 0.17207792 0.19805194 0.34415585 0.30194804 0.2987013 0.2987013 0.29220778 0.3961039 0.36038962 0.3409091 0.3051948 0.35064936 0.37012988 0.35064936 0.35064936 0.3409091 0.39935064 0.36688313 0.2012987 0.20454545 0.17857143 0.26298702 0.25 0.21428572 0.22402598 0.20454545 0.20779221 0.21753247 0.41558442 0.37337664 0.35714287 0.1396104 0.14935064 0.17532468 0.17857143 0.18831168 0.16558442 0.23376623 0.25 0.25324675 0.17532468 0.17857143 0.25324675 0.22727273 0.23376623 0.32792208 0.18506494 0.17857143 0.19480519 0.3474026 0.18506494 0.16883117 0.18181819 0.34415585 0.40584415 0.32792208 0.24675325 0.21103896 0.25974026 0.24350649 0.1590909 0.0 0.19805194 0.25324675 0.20454545 0.36363637
[109] 'ST1048-IV-ACME'           0.23376623 0.22077923 0.21428572 0.22727273 0.22077923 0.22727273 0.23051947 0.33441558 0.33441558 0.30194804 0.37337664 0.32467532 0.30194804 0.37662336 0.33441558 0.33116883 0.3051948 0.32467532 0.26948053 0.28896105 0.27272728 0.35064936 0.2792208 0.2987013 0.23051947 0.21428572 0.14285715 0.1590909 0.32467532 0.32467532 0.3051948 0.3181818 0.26623377 0.29545453 0.26298702 0.29545453 0.27597404 0.27272728 0.27272728 0.32467532 0.3409091 0.26948053 0.30844155 0.27597404 0.26623377 0.25 0.21753247 0.2564935 0.36688313 0.32142857 0.33766234 0.33116883 0.32467532 0.4090909 0.38636363 0.3538961 0.3474026 0.36688313 0.37987012 0.32467532 0.36363637 0.36363637 0.4025974 0.36038962 0.22077923 0.21428572 0.22077923 0.2857143 0.26948053 0.23701298 0.2564935 0.23051947 0.23701298 0.24350649 0.43506494 0.3961039 0.37987012 0.23376623 0.24350649 0.25 0.24025974 0.2564935 0.23376623 0.3116883 0.32467532 0.32142857 0.23701298 0.23051947 0.23701298 0.23376623 0.27272728 0.3474026 0.24350649 0.21103896 0.21103896 0.30194804 0.25324675 0.24350649 0.25974026 0.32792208 0.37987012 0.33766234 0.26948053 0.26948053 0.31493506 0.29220778 0.23051947 0.19805194 0.0 0.23701298 0.26948053 0.38636363
[110] 'ST1774-IV-ACME'           0.27272728 0.2792208 0.2857143 0.29220778 0.2857143 0.29220778 0.29545453 0.38636363 0.36038962 0.3409091 0.3961039 0.30844155 0.33766234 0.41883117 0.36038962 0.36038962 0.35064936 0.37337664 0.32142857 0.33116883 0.31493506 0.39935064 0.33766234 0.32467532 0.24025974 0.22077923 0.23701298 0.2564935 0.32467532 0.36363637 0.36688313 0.36038962 0.33116883 0.3538961 0.3116883 0.34415585 0.32142857 0.33441558 0.3116883 0.36688313 0.37662336 0.34415585 0.35064936 0.34415585 0.33766234 0.26948053 0.25324675 0.30194804 0.36363637 0.28246754 0.30194804 0.3116883 0.31493506 0.33766234 0.29220778 0.2987013 0.27272728 0.28896105 0.2857143 0.23376623 0.26623377 0.2792208 0.28896105 0.25 0.26948053 0.26623377 0.28246754 0.28896105 0.29220778 0.27597404 0.26623377 0.27597404 0.32467532 0.32142857 0.4448052 0.39285713 0.39285713 0.27272728 0.28896105 0.26298702 0.26948053 0.26948053 0.25 0.30844155 0.30194804 0.29545453 0.29545453 0.28246754 0.2857143 0.3116883 0.28896105 0.32792208 0.3181818 0.20454545 0.19480519 0.37662336 0.31493506 0.29545453 0.33116883 0.30194804 0.33766234 0.29220778 0.25974026 0.33766234 0.37337664 0.32792208 0.24675325 0.25324675 0.23701298 0.0 0.28896105 0.2857143
[111] 'CC15-MSSA'                0.22402598 0.22727273 0.24025974 0.2564935 0.24675325 0.25 0.26623377 0.30844155 0.27597404 0.25974026 0.32467532 0.34415585 0.2792208 0.31493506 0.27272728 0.26948053 0.2857143 0.28246754 0.26623377 0.28246754 0.2792208 0.29220778 0.28896105 0.2857143 0.19805194 0.23376623 0.23051947 0.23051947 0.30194804 0.27272728 0.28246754 0.26623377 0.26948053 0.30194804 0.2792208 0.27597404 0.2792208 0.2987013 0.24025974 0.3116883 0.31493506 0.29220778 0.2792208 0.29220778 0.29545453 0.23051947 0.24025974 0.26298702 0.4090909 0.39935064 0.37662336 0.36688313 0.37662336 0.41558442 0.37337664 0.38961038 0.34415585 0.4025974 0.3961039 0.39935064 0.37337664 0.38311687 0.36363637 0.40584415 0.22402598 0.26298702 0.2564935 0.27272728 0.25 0.23376623 0.25 0.2564935 0.27272728 0.27597404 0.46103895 0.41558442 0.41233766 0.22077923 0.2012987 0.19805194 0.21103896 0.23051947 0.22402598 0.32142857 0.30194804 0.3051948 0.24675325 0.23701298 0.3051948 0.26623377 0.2792208 0.37987012 0.24350649 0.23051947 0.23376623 0.32792208 0.24025974 0.23051947 0.27597404 0.37337664 0.37662336 0.32792208 0.31493506 0.25974026 0.25 0.28896105 0.24025974 0.20454545 0.26948053 0.28896105 0.0 0.35064936
[112] 'ST426-MSSA'               0.3961039 0.38636363 0.3961039 0.3961039 0.38311687 0.38311687 0.39935064 0.45454547 0.43506494 0.4448052 0.49675325 0.47727272 0.44805196 0.512987 0.45779222 0.46753246 0.45454547 0.4707792 0.39935064 0.42857143 0.4383117 0.4935065 0.44805196 0.44155845 0.36038962 0.37337664 0.3474026 0.3474026 0.40584415 0.42207792 0.4707792 0.45779222 0.42857143 0.47402596 0.43506494 0.42207792 0.42532468 0.42532468 0.3961039 0.43506494 0.46753246 0.44155845 0.42857143 0.44155845 0.4383117 0.35714287 0.36688313 0.3961039 0.37012988 0.37012988 0.35714287 0.33766234 0.34415585 0.33441558 0.30194804 0.2792208 0.27272728 0.30844155 0.28246754 0.25 0.23051947 0.2564935 0.29545453 0.2987013 0.3409091 0.3474026 0.35714287 0.38636363 0.37662336 0.3409091 0.3051948 0.36038962 0.4448052 0.43506494 0.46103895 0.41558442 0.42207792 0.37337664 0.39285713 0.37337664 0.3538961 0.36688313 0.37012988 0.3051948 0.32467532 0.30194804 0.39935064 0.38311687 0.4448052 0.41883117 0.34415585 0.36363637 0.38311687 0.38636363 0.36688313 0.46753246 0.4090909 0.39935064 0.4025974 0.2857143 0.2857143 0.26948053 0.2857143 0.40584415 0.4090909 0.4448052 0.3409091 0.36363637 0.38636363 0.2857143 0.35064936 0.0
;
END; [Distances]

BEGIN Splits;
DIMENSIONS ntax=112 nsplits=371;
FORMAT labels=no weights=yes confidences=no intervals=no;
PROPERTIES fit=93.904 cyclic;
CYCLE 1 3 4 5 7 6 94 95 26 109 27 28 47 46 68 69 72 65 67 70 66 71 77 75 76 84 85 86 92 102 101 100 112 63 64 62 58 59 61 60 56 54 55 57 103 52 53 51 50 49 110 91 99 98 97 40 41 39 35 36 29 30 96 34 31 32 43 44 42 33 38 37 106 87 88 90 89 74 73 12 13 8 9 15 14 22 11 16 20 18 10 23 21 24 17 19 104 105 45 48 107 93 108 78 79 111 25 82 83 80 81 2;
MATRIX
[1, size=1] 	 0.009550247 	  1 2 4 5 6 7 8 9 10 11 12 13 14 15 16 17 18 19 20 21 22 23 24 25 26 27 28 29 30 31 32 33 34 35 36 37 38 39 40 41 42 43 44 45 46 47 48 49 50 51 52 53 54 55 56 57 58 59 60 61 62 63 64 65 66 67 68 69 70 71 72 73 74 75 76 77 78 79 80 81 82 83 84 85 86 87 88 89 90 91 92 93 94 95 96 97 98 99 100 101 102 103 104 105 106 107 108 109 110 111 112,
[2, size=2] 	 0.0027337328 	  1 2 5 6 7 8 9 10 11 12 13 14 15 16 17 18 19 20 21 22 23 24 25 26 27 28 29 30 31 32 33 34 35 36 37 38 39 40 41 42 43 44 45 46 47 48 49 50 51 52 53 54 55 56 57 58 59 60 61 62 63 64 65 66 67 68 69 70 71 72 73 74 75 76 77 78 79 80 81 82 83 84 85 86 87 88 89 90 91 92 93 94 95 96 97 98 99 100 101 102 103 104 105 106 107 108 109 110 111 112,
[3, size=5] 	 0.0066051832 	  1 2 8 9 10 11 12 13 14 15 16 17 18 19 20 21 22 23 24 25 26 27 28 29 30 31 32 33 34 35 36 37 38 39 40 41 42 43 44 45 46 47 48 49 50 51 52 53 54 55 56 57 58 59 60 61 62 63 64 65 66 67 68 69 70 71 72 73 74 75 76 77 78 79 80 81 82 83 84 85 86 87 88 89 90 91 92 93 94 95 96 97 98 99 100 101 102 103 104 105 106 107 108 109 110 111 112,
[4, size=7] 	 0.0010399002 	  1 2 8 9 10 11 12 13 14 15 16 17 18 19 20 21 22 23 24 25 26 27 28 29 30 31 32 33 34 35 36 37 38 39 40 41 42 43 44 45 46 47 48 49 50 51 52 53 54 55 56 57 58 59 60 61 62 63 64 65 66 67 68 69 70 71 72 73 74 75 76 77 78 79 80 81 82 83 84 85 86 87 88 89 90 91 92 93 96 97 98 99 100 101 102 103 104 105 106 107 108 109 110 111 112,
[5, size=9] 	 0.0027190533 	  1 2 8 9 10 11 12 13 14 15 16 17 18 19 20 21 22 23 24 25 27 28 29 30 31 32 33 34 35 36 37 38 39 40 41 42 43 44 45 46 47 48 49 50 51 52 53 54 55 56 57 58 59 60 61 62 63 64 65 66 67 68 69 70 71 72 73 74 75 76 77 78 79 80 81 82 83 84 85 86 87 88 89 90 91 92 93 96 97 98 99 100 101 102 103 104 105 106 107 108 110 111 112,
[6, size=12] 	 0.0026521285 	  1 2 8 9 10 11 12 13 14 15 16 17 18 19 20 21 22 23 24 25 29 30 31 32 33 34 35 36 37 38 39 40 41 42 43 44 45 46 48 49 50 51 52 53 54 55 56 57 58 59 60 61 62 63 64 65 66 67 68 69 70 71 72 73 74 75 76 77 78 79 80 81 82 83 84 85 86 87 88 89 90 91 92 93 96 97 98 99 100 101 102 103 104 105 106 107 108 110 111 112,
[7, size=4] 	 0.0064540636 	  1 2 80 81,
[8, size=1] 	 0.026264288 	  1,
[9, size=1] 	 0.040327862 	  1 2 3 5 6 7 8 9 10 11 12 13 14 15 16 17 18 19 20 21 22 23 24 25 26 27 28 29 30 31 32 33 34 35 36 37 38 39 40 41 42 43 44 45 46 47 48 49 50 51 52 53 54 55 56 57 58 59 60 61 62 63 64 65 66 67 68 69 70 71 72 73 74 75 76 77 78 79 80 81 82 83 84 85 86 87 88 89 90 91 92 93 94 95 96 97 98 99 100 101 102 103 104 105 106 107 108 109 110 111 112,
[10, size=3] 	 0.008426325 	  1 2 3 6 8 9 10 11 12 13 14 15 16 17 18 19 20 21 22 23 24 25 26 27 28 29 30 31 32 33 34 35 36 37 38 39 40 41 42 43 44 45 46 47 48 49 50 51 52 53 54 55 56 57 58 59 60 61 62 63 64 65 66 67 68 69 70 71 72 73 74 75 76 77 78 79 80 81 82 83 84 85 86 87 88 89 90 91 92 93 94 95 96 97 98 99 100 101 102 103 104 105 106 107 108 109 110 111 112,
[11, size=5] 	 0.010168338 	  1 2 3 80 81,
[12, size=2] 	 0.013494053 	  1 3,
[13, size=1] 	 0.0069591636 	  1 2 3 4 6 7 8 9 10 11 12 13 14 15 16 17 18 19 20 21 22 23 24 25 26 27 28 29 30 31 32 33 34 35 36 37 38 39 40 41 42 43 44 45 46 47 48 49 50 51 52 53 54 55 56 57 58 59 60 61 62 63 64 65 66 67 68 69 70 71 72 73 74 75 76 77 78 79 80 81 82 83 84 85 86 87 88 89 90 91 92 93 94 95 96 97 98 99 100 101 102 103 104 105 106 107 108 109 110 111 112,
[14, size=3] 	 0.023912214 	  1 2 3 4 8 9 10 11 12 13 14 15 16 17 18 19 20 21 22 23 24 25 26 27 28 29 30 31 32 33 34 35 36 37 38 39 40 41 42 43 44 45 46 47 48 49 50 51 52 53 54 55 56 57 58 59 60 61 62 63 64 65 66 67 68 69 70 71 72 73 74 75 76 77 78 79 80 81 82 83 84 85 86 87 88 89 90 91 92 93 94 95 96 97 98 99 100 101 102 103 104 105 106 107 108 109 110 111 112,
[15, size=6] 	 0.008590335 	  1 2 3 4 8 9 10 11 12 13 14 15 16 17 18 19 20 21 22 23 24 25 27 28 29 30 31 32 33 34 35 36 37 38 39 40 41 42 43 44 45 46 47 48 49 50 51 52 53 54 55 56 57 58 59 60 61 62 63 64 65 66 67 68 69 70 71 72 73 74 75 76 77 78 79 80 81 82 83 84 85 86 87 88 89 90 91 92 93 96 97 98 99 100 101 102 103 104 105 106 107 108 109 110 111 112,
[16, size=7] 	 0.004172024 	  1 2 3 4 8 9 10 11 12 13 14 15 16 17 18 19 20 21 22 23 24 25 27 28 29 30 31 32 33 34 35 36 37 38 39 40 41 42 43 44 45 46 47 48 49 50 51 52 53 54 55 56 57 58 59 60 61 62 63 64 65 66 67 68 69 70 71 72 73 74 75 76 77 78 79 80 81 82 83 84 85 86 87 88 89 90 91 92 93 96 97 98 99 100 101 102 103 104 105 106 107 108 110 111 112,
[17, size=9] 	 2.689129E-4 	  1 2 3 4 8 9 10 11 12 13 14 15 16 17 18 19 20 21 22 23 24 25 29 30 31 32 33 34 35 36 37 38 39 40 41 42 43 44 45 46 47 48 49 50 51 52 53 54 55 56 57 58 59 60 61 62 63 64 65 66 67 68 69 70 71 72 73 74 75 76 77 78 79 80 81 82 83 84 85 86 87 88 89 90 91 92 93 96 97 98 99 100 101 102 103 104 105 106 107 108 110 111 112,
[18, size=15] 	 0.001477013 	  1 2 3 4 25 78 79 80 81 82 83 93 107 108 111,
[19, size=4] 	 0.0041493196 	  1 2 3 4,
[20, size=1] 	 0.010448468 	  1 2 3 4 5 6 8 9 10 11 12 13 14 15 16 17 18 19 20 21 22 23 24 25 26 27 28 29 30 31 32 33 34 35 36 37 38 39 40 41 42 43 44 45 46 47 48 49 50 51 52 53 54 55 56 57 58 59 60 61 62 63 64 65 66 67 68 69 70 71 72 73 74 75 76 77 78 79 80 81 82 83 84 85 86 87 88 89 90 91 92 93 94 95 96 97 98 99 100 101 102 103 104 105 106 107 108 109 110 111 112,
[21, size=2] 	 0.005596212 	  1 2 3 4 5 8 9 10 11 12 13 14 15 16 17 18 19 20 21 22 23 24 25 26 27 28 29 30 31 32 33 34 35 36 37 38 39 40 41 42 43 44 45 46 47 48 49 50 51 52 53 54 55 56 57 58 59 60 61 62 63 64 65 66 67 68 69 70 71 72 73 74 75 76 77 78 79 80 81 82 83 84 85 86 87 88 89 90 91 92 93 94 95 96 97 98 99 100 101 102 103 104 105 106 107 108 109 110 111 112,
[22, size=8] 	 6.5946364E-4 	  1 2 3 4 5 8 9 10 11 12 13 14 15 16 17 18 19 20 21 22 23 24 25 29 30 31 32 33 34 35 36 37 38 39 40 41 42 43 44 45 46 47 48 49 50 51 52 53 54 55 56 57 58 59 60 61 62 63 64 65 66 67 68 69 70 71 72 73 74 75 76 77 78 79 80 81 82 83 84 85 86 87 88 89 90 91 92 93 96 97 98 99 100 101 102 103 104 105 106 107 108 110 111 112,
[23, size=41] 	 4.2855344E-4 	  1 2 3 4 5 8 9 10 11 12 13 14 15 16 17 18 19 20 21 22 23 24 25 29 30 31 32 33 34 35 36 37 38 39 40 41 42 43 44 45 48 49 50 51 52 53 73 74 78 79 80 81 82 83 87 88 89 90 91 93 96 97 98 99 104 105 106 107 108 110 111,
[24, size=15] 	 2.3555294E-4 	  1 2 3 4 5 25 78 79 80 81 82 83 93 108 111,
[25, size=1] 	 0.01187933 	  1 2 3 4 5 7 8 9 10 11 12 13 14 15 16 17 18 19 20 21 22 23 24 25 26 27 28 29 30 31 32 33 34 35 36 37 38 39 40 41 42 43 44 45 46 47 48 49 50 51 52 53 54 55 56 57 58 59 60 61 62 63 64 65 66 67 68 69 70 71 72 73 74 75 76 77 78 79 80 81 82 83 84 85 86 87 88 89 90 91 92 93 94 95 96 97 98 99 100 101 102 103 104 105 106 107 108 109 110 111 112,
[26, size=3] 	 0.0016558652 	  1 2 3 4 5 7 8 9 10 11 12 13 14 15 16 17 18 19 20 21 22 23 24 25 26 27 28 29 30 31 32 33 34 35 36 37 38 39 40 41 42 43 44 45 46 47 48 49 50 51 52 53 54 55 56 57 58 59 60 61 62 63 64 65 66 67 68 69 70 71 72 73 74 75 76 77 78 79 80 81 82 83 84 85 86 87 88 89 90 91 92 93 96 97 98 99 100 101 102 103 104 105 106 107 108 109 110 111 112,
[27, size=40] 	 0.0017448125 	  1 2 3 4 5 7 8 9 10 11 12 13 14 15 16 17 18 19 20 21 22 23 24 25 29 30 31 32 33 34 35 36 37 38 39 40 41 42 43 44 45 48 49 50 51 52 53 73 74 78 79 80 81 82 83 87 88 89 90 91 93 96 97 98 99 104 105 106 107 108 110 111,
[28, size=16] 	 6.830127E-4 	  1 2 3 4 5 7 25 78 79 80 81 82 83 93 108 111,
[29, size=1] 	 0.053259708 	  1 2 3 4 5 6 7 8 9 10 11 12 13 14 15 16 17 18 19 20 21 22 23 24 25 26 27 28 29 30 31 32 33 34 35 36 37 38 39 40 41 42 43 44 45 46 47 48 49 50 51 52 53 54 55 56 57 58 59 60 61 62 63 64 65 66 67 68 69 70 71 72 73 74 75 76 77 78 79 80 81 82 83 84 85 86 87 88 89 90 91 92 93 95 96 97 98 99 100 101 102 103 104 105 106 107 108 109 110 111 112,
[30, size=2] 	 0.008339942 	  1 2 3 4 5 6 7 8 9 10 11 12 13 14 15 16 17 18 19 20 21 22 23 24 25 26 27 28 29 30 31 32 33 34 35 36 37 38 39 40 41 42 43 44 45 46 47 48 49 50 51 52 53 54 55 56 57 58 59 60 61 62 63 64 65 66 67 68 69 70 71 72 73 74 75 76 77 78 79 80 81 82 83 84 85 86 87 88 89 90 91 92 93 96 97 98 99 100 101 102 103 104 105 106 107 108 109 110 111 112,
[31, size=51] 	 0.0024118002 	  1 2 3 4 5 6 7 8 9 10 11 12 13 14 15 16 17 18 19 20 21 22 23 24 25 29 30 31 32 33 34 35 36 37 38 39 42 43 44 45 48 73 74 78 79 80 81 82 83 87 88 89 90 93 96 104 105 106 107 108 111,
[32, size=11] 	 0.004365338 	  1 2 3 4 5 6 7 80 81 82 83,
[33, size=7] 	 0.029550508 	  1 2 3 4 5 6 7,
[34, size=1] 	 0.031114183 	  1 2 3 4 5 6 7 8 9 10 11 12 13 14 15 16 17 18 19 20 21 22 23 24 25 26 27 28 29 30 31 32 33 34 35 36 37 38 39 40 41 42 43 44 45 46 47 48 49 50 51 52 53 54 55 56 57 58 59 60 61 62 63 64 65 66 67 68 69 70 71 72 73 74 75 76 77 78 79 80 81 82 83 84 85 86 87 88 89 90 91 92 93 94 96 97 98 99 100 101 102 103 104 105 106 107 108 109 110 111 112,
[35, size=2] 	 0.028385855 	  1 2 3 4 5 6 7 8 9 10 11 12 13 14 15 16 17 18 19 20 21 22 23 24 25 27 28 29 30 31 32 33 34 35 36 37 38 39 40 41 42 43 44 45 46 47 48 49 50 51 52 53 54 55 56 57 58 59 60 61 62 63 64 65 66 67 68 69 70 71 72 73 74 75 76 77 78 79 80 81 82 83 84 85 86 87 88 89 90 91 92 93 94 96 97 98 99 100 101 102 103 104 105 106 107 108 109 110 111 112,
[36, size=3] 	 2.590876E-5 	  1 2 3 4 5 6 7 8 9 10 11 12 13 14 15 16 17 18 19 20 21 22 23 24 25 27 28 29 30 31 32 33 34 35 36 37 38 39 40 41 42 43 44 45 46 47 48 49 50 51 52 53 54 55 56 57 58 59 60 61 62 63 64 65 66 67 68 69 70 71 72 73 74 75 76 77 78 79 80 81 82 83 84 85 86 87 88 89 90 91 92 93 94 96 97 98 99 100 101 102 103 104 105 106 107 108 110 111 112,
[37, size=38] 	 0.0015791118 	  1 2 3 4 5 6 7 8 9 10 11 12 13 14 15 16 17 18 19 20 21 22 23 24 25 29 30 31 32 33 34 35 36 37 38 39 40 41 42 43 44 45 48 49 50 51 52 53 73 74 78 79 80 81 82 83 87 88 89 90 91 93 94 96 97 98 99 104 105 106 107 108 110 111,
[38, size=1] 	 0.050353225 	  1 2 3 4 5 6 7 8 9 10 11 12 13 14 15 16 17 18 19 20 21 22 23 24 25 27 28 29 30 31 32 33 34 35 36 37 38 39 40 41 42 43 44 45 46 47 48 49 50 51 52 53 54 55 56 57 58 59 60 61 62 63 64 65 66 67 68 69 70 71 72 73 74 75 76 77 78 79 80 81 82 83 84 85 86 87 88 89 90 91 92 93 94 95 96 97 98 99 100 101 102 103 104 105 106 107 108 109 110 111 112,
[39, size=2] 	 0.005365292 	  1 2 3 4 5 6 7 8 9 10 11 12 13 14 15 16 17 18 19 20 21 22 23 24 25 27 28 29 30 31 32 33 34 35 36 37 38 39 40 41 42 43 44 45 46 47 48 49 50 51 52 53 54 55 56 57 58 59 60 61 62 63 64 65 66 67 68 69 70 71 72 73 74 75 76 77 78 79 80 81 82 83 84 85 86 87 88 89 90 91 92 93 94 95 96 97 98 99 100 101 102 103 104 105 106 107 108 110 111 112,
[40, size=13] 	 0.009618969 	  1 2 3 4 5 6 7 80 81 82 83 94 95,
[41, size=9] 	 0.0033425172 	  1 2 3 4 5 6 7 94 95,
[42, size=1] 	 0.07197042 	  1 2 3 4 5 6 7 8 9 10 11 12 13 14 15 16 17 18 19 20 21 22 23 24 25 26 27 28 29 30 31 32 33 34 35 36 37 38 39 40 41 42 43 44 45 46 47 48 49 50 51 52 53 54 55 56 57 58 59 60 61 62 63 64 65 66 67 68 69 70 71 72 73 74 75 76 77 78 79 80 81 82 83 84 85 86 87 88 89 90 91 92 93 94 95 96 97 98 99 100 101 102 103 104 105 106 107 108 110 111 112,
[43, size=2] 	 0.01014823 	  1 2 3 4 5 6 7 8 9 10 11 12 13 14 15 16 17 18 19 20 21 22 23 24 25 26 28 29 30 31 32 33 34 35 36 37 38 39 40 41 42 43 44 45 46 47 48 49 50 51 52 53 54 55 56 57 58 59 60 61 62 63 64 65 66 67 68 69 70 71 72 73 74 75 76 77 78 79 80 81 82 83 84 85 86 87 88 89 90 91 92 93 94 95 96 97 98 99 100 101 102 103 104 105 106 107 108 110 111 112,
[44, size=3] 	 0.020732515 	  1 2 3 4 5 6 7 8 9 10 11 12 13 14 15 16 17 18 19 20 21 22 23 24 25 26 29 30 31 32 33 34 35 36 37 38 39 40 41 42 43 44 45 46 47 48 49 50 51 52 53 54 55 56 57 58 59 60 61 62 63 64 65 66 67 68 69 70 71 72 73 74 75 76 77 78 79 80 81 82 83 84 85 86 87 88 89 90 91 92 93 94 95 96 97 98 99 100 101 102 103 104 105 106 107 108 110 111 112,
[45, size=28] 	 5.793379E-4 	  1 2 3 4 5 6 7 8 9 10 11 12 13 14 15 16 17 18 19 20 21 22 23 24 25 26 29 30 31 32 33 34 35 36 37 38 39 40 41 42 43 44 45 48 49 50 51 52 53 54 55 56 57 59 60 61 73 74 78 79 80 81 82 83 87 88 89 90 91 93 94 95 96 97 98 99 103 104 105 106 107 108 110 111,
[46, size=33] 	 9.801876E-5 	  1 2 3 4 5 6 7 8 9 10 11 12 13 14 15 16 17 18 19 20 21 22 23 24 25 26 29 30 31 32 33 34 35 36 37 38 39 40 41 42 43 44 45 48 49 50 51 52 53 55 57 73 74 78 79 80 81 82 83 87 88 89 90 91 93 94 95 96 97 98 99 103 104 105 106 107 108 110 111,
[47, size=55] 	 1.3213036E-4 	  1 2 3 4 5 6 7 8 9 10 11 12 13 14 15 16 17 18 19 20 21 22 23 24 25 26 31 32 33 37 38 42 43 44 45 48 73 74 78 79 80 81 82 83 87 88 89 90 93 94 95 104 105 106 107 108 111,
[48, size=1] 	 0.0040350296 	  1 2 3 4 5 6 7 8 9 10 11 12 13 14 15 16 17 18 19 20 21 22 23 24 25 26 28 29 30 31 32 33 34 35 36 37 38 39 40 41 42 43 44 45 46 47 48 49 50 51 52 53 54 55 56 57 58 59 60 61 62 63 64 65 66 67 68 69 70 71 72 73 74 75 76 77 78 79 80 81 82 83 84 85 86 87 88 89 90 91 92 93 94 95 96 97 98 99 100 101 102 103 104 105 106 107 108 109 110 111 112,
[49, size=2] 	 0.01826958 	  1 2 3 4 5 6 7 8 9 10 11 12 13 14 15 16 17 18 19 20 21 22 23 24 25 26 29 30 31 32 33 34 35 36 37 38 39 40 41 42 43 44 45 46 47 48 49 50 51 52 53 54 55 56 57 58 59 60 61 62 63 64 65 66 67 68 69 70 71 72 73 74 75 76 77 78 79 80 81 82 83 84 85 86 87 88 89 90 91 92 93 94 95 96 97 98 99 100 101 102 103 104 105 106 107 108 109 110 111 112,
[50, size=4] 	 0.025434257 	  1 2 3 4 5 6 7 8 9 10 11 12 13 14 15 16 17 18 19 20 21 22 23 24 25 26 29 30 31 32 33 34 35 36 37 38 39 40 41 42 43 44 45 48 49 50 51 52 53 54 55 56 57 58 59 60 61 62 63 64 65 66 67 68 69 70 71 72 73 74 75 76 77 78 79 80 81 82 83 84 85 86 87 88 89 90 91 92 93 94 95 96 97 98 99 100 101 102 103 104 105 106 107 108 109 110 111 112,
[51, size=11] 	 9.89539E-4 	  1 2 3 4 5 6 7 26 94 95 109,
[52, size=1] 	 0.022754598 	  1 2 3 4 5 6 7 8 9 10 11 12 13 14 15 16 17 18 19 20 21 22 23 24 25 26 27 29 30 31 32 33 34 35 36 37 38 39 40 41 42 43 44 45 46 47 48 49 50 51 52 53 54 55 56 57 58 59 60 61 62 63 64 65 66 67 68 69 70 71 72 73 74 75 76 77 78 79 80 81 82 83 84 85 86 87 88 89 90 91 92 93 94 95 96 97 98 99 100 101 102 103 104 105 106 107 108 109 110 111 112,
[53, size=1] 	 0.024681745 	  1 2 3 4 5 6 7 8 9 10 11 12 13 14 15 16 17 18 19 20 21 22 23 24 25 26 27 28 29 30 31 32 33 34 35 36 37 38 39 40 41 42 43 44 45 46 48 49 50 51 52 53 54 55 56 57 58 59 60 61 62 63 64 65 66 67 68 69 70 71 72 73 74 75 76 77 78 79 80 81 82 83 84 85 86 87 88 89 90 91 92 93 94 95 96 97 98 99 100 101 102 103 104 105 106 107 108 109 110 111 112,
[54, size=2] 	 0.038203117 	  1 2 3 4 5 6 7 8 9 10 11 12 13 14 15 16 17 18 19 20 21 22 23 24 25 26 27 28 29 30 31 32 33 34 35 36 37 38 39 40 41 42 43 44 45 48 49 50 51 52 53 54 55 56 57 58 59 60 61 62 63 64 65 66 67 68 69 70 71 72 73 74 75 76 77 78 79 80 81 82 83 84 85 86 87 88 89 90 91 92 93 94 95 96 97 98 99 100 101 102 103 104 105 106 107 108 109 110 111 112,
[55, size=17] 	 3.5642931E-4 	  1 2 3 4 5 6 7 26 27 28 80 81 82 83 94 95 109,
[56, size=13] 	 0.003109539 	  1 2 3 4 5 6 7 26 27 28 94 95 109,
[57, size=1] 	 0.037639838 	  1 2 3 4 5 6 7 8 9 10 11 12 13 14 15 16 17 18 19 20 21 22 23 24 25 26 27 28 29 30 31 32 33 34 35 36 37 38 39 40 41 42 43 44 45 47 48 49 50 51 52 53 54 55 56 57 58 59 60 61 62 63 64 65 66 67 68 69 70 71 72 73 74 75 76 77 78 79 80 81 82 83 84 85 86 87 88 89 90 91 92 93 94 95 96 97 98 99 100 101 102 103 104 105 106 107 108 109 110 111 112,
[58, size=26] 	 2.4454514E-4 	  1 2 3 4 5 6 7 8 9 10 11 12 13 14 15 16 17 18 19 20 21 22 23 24 25 26 27 28 29 30 31 32 33 34 35 36 37 38 39 40 41 42 43 44 45 47 48 49 50 51 52 53 54 55 56 57 60 73 74 78 79 80 81 82 83 87 88 89 90 91 93 94 95 96 97 98 99 103 104 105 106 107 108 109 110 111,
[59, size=1] 	 0.040851675 	  1 2 3 4 5 6 7 8 9 10 11 12 13 14 15 16 17 18 19 20 21 22 23 24 25 26 27 28 29 30 31 32 33 34 35 36 37 38 39 40 41 42 43 44 45 46 47 48 49 50 51 52 53 54 55 56 57 58 59 60 61 62 63 64 65 66 67 69 70 71 72 73 74 75 76 77 78 79 80 81 82 83 84 85 86 87 88 89 90 91 92 93 94 95 96 97 98 99 100 101 102 103 104 105 106 107 108 109 110 111 112,
[60, size=2] 	 0.03267878 	  1 2 3 4 5 6 7 8 9 10 11 12 13 14 15 16 17 18 19 20 21 22 23 24 25 26 27 28 29 30 31 32 33 34 35 36 37 38 39 40 41 42 43 44 45 46 47 48 49 50 51 52 53 54 55 56 57 58 59 60 61 62 63 64 65 66 67 70 71 72 73 74 75 76 77 78 79 80 81 82 83 84 85 86 87 88 89 90 91 92 93 94 95 96 97 98 99 100 101 102 103 104 105 106 107 108 109 110 111 112,
[61, size=3] 	 0.010422063 	  1 2 3 4 5 6 7 8 9 10 11 12 13 14 15 16 17 18 19 20 21 22 23 24 25 26 27 28 29 30 31 32 33 34 35 36 37 38 39 40 41 42 43 44 45 46 47 48 49 50 51 52 53 54 55 56 57 58 59 60 61 62 63 64 65 66 67 70 71 73 74 75 76 77 78 79 80 81 82 83 84 85 86 87 88 89 90 91 92 93 94 95 96 97 98 99 100 101 102 103 104 105 106 107 108 109 110 111 112,
[62, size=4] 	 0.0049180817 	  1 2 3 4 5 6 7 8 9 10 11 12 13 14 15 16 17 18 19 20 21 22 23 24 25 26 27 28 29 30 31 32 33 34 35 36 37 38 39 40 41 42 43 44 45 46 47 48 49 50 51 52 53 54 55 56 57 58 59 60 61 62 63 64 66 67 70 71 73 74 75 76 77 78 79 80 81 82 83 84 85 86 87 88 89 90 91 92 93 94 95 96 97 98 99 100 101 102 103 104 105 106 107 108 109 110 111 112,
[63, size=7] 	 0.014327458 	  1 2 3 4 5 6 7 8 9 10 11 12 13 14 15 16 17 18 19 20 21 22 23 24 25 26 27 28 29 30 31 32 33 34 35 36 37 38 39 40 41 42 43 44 45 46 47 48 49 50 51 52 53 54 55 56 57 58 59 60 61 62 63 64 71 73 74 75 76 77 78 79 80 81 82 83 84 85 86 87 88 89 90 91 92 93 94 95 96 97 98 99 100 101 102 103 104 105 106 107 108 109 110 111 112,
[64, size=8] 	 0.036446117 	  1 2 3 4 5 6 7 8 9 10 11 12 13 14 15 16 17 18 19 20 21 22 23 24 25 26 27 28 29 30 31 32 33 34 35 36 37 38 39 40 41 42 43 44 45 46 47 48 49 50 51 52 53 54 55 56 57 58 59 60 61 62 63 64 73 74 75 76 77 78 79 80 81 82 83 84 85 86 87 88 89 90 91 92 93 94 95 96 97 98 99 100 101 102 103 104 105 106 107 108 109 110 111 112,
[65, size=9] 	 0.006396542 	  1 2 3 4 5 6 7 8 9 10 11 12 13 14 15 16 17 18 19 20 21 22 23 24 25 26 27 28 29 30 31 32 33 34 35 36 37 38 39 40 41 42 43 44 45 46 47 48 49 50 51 52 53 54 55 56 57 58 59 60 61 62 63 64 73 74 75 76 78 79 80 81 82 83 84 85 86 87 88 89 90 91 92 93 94 95 96 97 98 99 100 101 102 103 104 105 106 107 108 109 110 111 112,
[66, size=22] 	 0.0011852189 	  1 2 3 4 5 6 7 8 9 10 11 12 13 14 15 16 17 18 19 20 21 22 23 24 25 26 27 28 29 30 31 32 33 34 35 36 37 38 39 40 41 42 43 44 45 46 47 48 49 50 51 52 53 54 55 56 57 58 59 60 61 73 74 78 79 80 81 82 83 87 88 89 90 91 93 94 95 96 97 98 99 103 104 105 106 107 108 109 110 111,
[67, size=26] 	 0.004151524 	  1 2 3 4 5 6 7 8 9 10 11 12 13 14 15 16 17 18 19 20 21 22 23 24 25 26 27 28 29 30 31 32 33 34 35 36 37 38 39 40 41 42 43 44 45 46 47 48 49 50 51 52 53 54 55 56 57 73 74 78 79 80 81 82 83 87 88 89 90 91 93 94 95 96 97 98 99 103 104 105 106 107 108 109 110 111,
[68, size=30] 	 0.0030361647 	  1 2 3 4 5 6 7 8 9 10 11 12 13 14 15 16 17 18 19 20 21 22 23 24 25 26 27 28 29 30 31 32 33 34 35 36 37 38 39 40 41 42 43 44 45 46 47 48 49 50 51 52 53 73 74 78 79 80 81 82 83 87 88 89 90 91 93 94 95 96 97 98 99 103 104 105 106 107 108 109 110 111,
[69, size=37] 	 0.0034076453 	  1 2 3 4 5 6 7 8 9 10 11 12 13 14 15 16 17 18 19 20 21 22 23 24 25 26 27 28 29 30 31 32 33 34 35 36 37 38 39 40 41 42 43 44 45 46 47 48 73 74 78 79 80 81 82 83 87 88 89 90 91 93 94 95 96 97 98 99 104 105 106 107 108 109 111,
[70, size=1] 	 0.023940729 	  1 2 3 4 5 6 7 8 9 10 11 12 13 14 15 16 17 18 19 20 21 22 23 24 25 26 27 28 29 30 31 32 33 34 35 36 37 38 39 40 41 42 43 44 45 46 47 48 49 50 51 52 53 54 55 56 57 58 59 60 61 62 63 64 65 66 67 68 70 71 72 73 74 75 76 77 78 79 80 81 82 83 84 85 86 87 88 89 90 91 92 93 94 95 96 97 98 99 100 101 102 103 104 105 106 107 108 109 110 111 112,
[71, size=5] 	 0.0036034407 	  1 2 3 4 5 6 7 8 9 10 11 12 13 14 15 16 17 18 19 20 21 22 23 24 25 26 27 28 29 30 31 32 33 34 35 36 37 38 39 40 41 42 43 44 45 46 47 48 49 50 51 52 53 54 55 56 57 58 59 60 61 62 63 64 66 68 71 73 74 75 76 77 78 79 80 81 82 83 84 85 86 87 88 89 90 91 92 93 94 95 96 97 98 99 100 101 102 103 104 105 106 107 108 109 110 111 112,
[72, size=7] 	 0.007741533 	  1 2 3 4 5 6 7 8 9 10 11 12 13 14 15 16 17 18 19 20 21 22 23 24 25 26 27 28 29 30 31 32 33 34 35 36 37 38 39 40 41 42 43 44 45 46 47 48 49 50 51 52 53 54 55 56 57 58 59 60 61 62 63 64 68 73 74 75 76 77 78 79 80 81 82 83 84 85 86 87 88 89 90 91 92 93 94 95 96 97 98 99 100 101 102 103 104 105 106 107 108 109 110 111 112,
[73, size=1] 	 0.027645081 	  1 2 3 4 5 6 7 8 9 10 11 12 13 14 15 16 17 18 19 20 21 22 23 24 25 26 27 28 29 30 31 32 33 34 35 36 37 38 39 40 41 42 43 44 45 46 47 48 49 50 51 52 53 54 55 56 57 58 59 60 61 62 63 64 65 66 67 68 69 70 71 73 74 75 76 77 78 79 80 81 82 83 84 85 86 87 88 89 90 91 92 93 94 95 96 97 98 99 100 101 102 103 104 105 106 107 108 109 110 111 112,
[74, size=1] 	 0.02894026 	  1 2 3 4 5 6 7 8 9 10 11 12 13 14 15 16 17 18 19 20 21 22 23 24 25 26 27 28 29 30 31 32 33 34 35 36 37 38 39 40 41 42 43 44 45 46 47 48 49 50 51 52 53 54 55 56 57 58 59 60 61 62 63 64 66 67 68 69 70 71 72 73 74 75 76 77 78 79 80 81 82 83 84 85 86 87 88 89 90 91 92 93 94 95 96 97 98 99 100 101 102 103 104 105 106 107 108 109 110 111 112,
[75, size=6] 	 0.00397214 	  1 2 3 4 5 6 7 8 9 10 11 12 13 14 15 16 17 18 19 20 21 22 23 24 25 26 27 28 29 30 31 32 33 34 35 36 37 38 39 40 41 42 43 44 45 46 47 48 49 50 51 52 53 54 55 56 57 58 59 60 61 62 63 64 68 69 72 73 74 75 76 78 79 80 81 82 83 84 85 86 87 88 89 90 91 92 93 94 95 96 97 98 99 100 101 102 103 104 105 106 107 108 109 110 111 112,
[76, size=36] 	 0.0032743262 	  1 2 3 4 5 6 7 8 9 10 11 12 13 14 15 16 17 18 19 20 21 22 23 24 25 26 27 28 29 30 31 32 33 34 35 36 37 38 39 40 41 42 43 44 45 46 47 48 68 69 72 73 74 78 79 80 81 82 83 87 88 89 90 93 94 95 96 97 98 104 105 106 107 108 109 111,
[77, size=1] 	 0.03164682 	  1 2 3 4 5 6 7 8 9 10 11 12 13 14 15 16 17 18 19 20 21 22 23 24 25 26 27 28 29 30 31 32 33 34 35 36 37 38 39 40 41 42 43 44 45 46 47 48 49 50 51 52 53 54 55 56 57 58 59 60 61 62 63 64 65 66 68 69 70 71 72 73 74 75 76 77 78 79 80 81 82 83 84 85 86 87 88 89 90 91 92 93 94 95 96 97 98 99 100 101 102 103 104 105 106 107 108 109 110 111 112,
[78, size=2] 	 0.0022865392 	  1 2 3 4 5 6 7 8 9 10 11 12 13 14 15 16 17 18 19 20 21 22 23 24 25 26 27 28 29 30 31 32 33 34 35 36 37 38 39 40 41 42 43 44 45 46 47 48 49 50 51 52 53 54 55 56 57 58 59 60 61 62 63 64 65 66 68 69 71 72 73 74 75 76 77 78 79 80 81 82 83 84 85 86 87 88 89 90 91 92 93 94 95 96 97 98 99 100 101 102 103 104 105 106 107 108 109 110 111 112,
[79, size=39] 	 3.8031442E-4 	  1 2 3 4 5 6 7 8 9 10 11 12 13 14 15 16 17 18 19 20 21 22 23 24 25 26 27 28 29 30 31 32 33 34 35 36 37 38 39 42 43 44 45 46 47 48 65 68 69 72 73 74 78 79 80 81 82 83 87 88 89 90 93 94 95 96 104 105 106 107 108 109 111,
[80, size=1] 	 0.03715029 	  1 2 3 4 5 6 7 8 9 10 11 12 13 14 15 16 17 18 19 20 21 22 23 24 25 26 27 28 29 30 31 32 33 34 35 36 37 38 39 40 41 42 43 44 45 46 47 48 49 50 51 52 53 54 55 56 57 58 59 60 61 62 63 64 65 66 67 68 69 71 72 73 74 75 76 77 78 79 80 81 82 83 84 85 86 87 88 89 90 91 92 93 94 95 96 97 98 99 100 101 102 103 104 105 106 107 108 109 110 111 112,
[81, size=3] 	 1.4072067E-4 	  1 2 3 4 5 6 7 8 9 10 11 12 13 14 15 16 17 18 19 20 21 22 23 24 25 26 27 28 29 30 31 32 33 34 35 36 37 38 39 40 41 42 43 44 45 46 47 48 49 50 51 52 53 54 55 56 57 58 59 60 61 62 63 64 65 67 68 69 72 73 74 75 76 77 78 79 80 81 82 83 84 85 86 87 88 89 90 91 92 93 94 95 96 97 98 99 100 101 102 103 104 105 106 107 108 109 110 111 112,
[82, size=33] 	 3.099031E-4 	  1 2 3 4 5 6 7 8 9 10 11 12 13 14 15 16 17 18 19 20 21 22 23 24 25 26 27 28 29 30 31 32 33 34 35 36 37 38 39 40 41 42 43 44 45 46 47 48 65 67 68 69 72 73 74 78 79 80 81 82 83 87 88 89 90 93 94 95 96 97 98 99 104 105 106 107 108 109 111,
[83, size=1] 	 0.037240695 	  1 2 3 4 5 6 7 8 9 10 11 12 13 14 15 16 17 18 19 20 21 22 23 24 25 26 27 28 29 30 31 32 33 34 35 36 37 38 39 40 41 42 43 44 45 46 47 48 49 50 51 52 53 54 55 56 57 58 59 60 61 62 63 64 65 67 68 69 70 71 72 73 74 75 76 77 78 79 80 81 82 83 84 85 86 87 88 89 90 91 92 93 94 95 96 97 98 99 100 101 102 103 104 105 106 107 108 109 110 111 112,
[84, size=24] 	 4.5049164E-4 	  1 2 3 4 5 6 7 8 9 10 11 12 13 14 15 16 17 18 19 20 21 22 23 24 25 26 27 28 29 30 31 32 33 34 35 36 37 38 39 40 41 42 43 44 45 46 47 48 49 50 51 52 53 65 67 68 69 70 72 73 74 78 79 80 81 82 83 87 88 89 90 91 93 94 95 96 97 98 99 103 104 105 106 107 108 109 110 111,
[85, size=31] 	 0.006188227 	  1 2 3 4 5 6 7 8 9 10 11 12 13 14 15 16 17 18 19 20 21 22 23 24 25 26 27 28 29 30 31 32 33 34 35 36 37 38 39 40 41 42 43 44 45 46 47 48 65 67 68 69 70 72 73 74 78 79 80 81 82 83 87 88 89 90 91 93 94 95 96 97 98 99 104 105 106 107 108 109 111,
[86, size=1] 	 0.05102959 	  1 2 3 4 5 6 7 8 9 10 11 12 13 14 15 16 17 18 19 20 21 22 23 24 25 26 27 28 29 30 31 32 33 34 35 36 37 38 39 40 41 42 43 44 45 46 47 48 49 50 51 52 53 54 55 56 57 58 59 60 61 62 63 64 65 66 67 68 69 70 72 73 74 75 76 77 78 79 80 81 82 83 84 85 86 87 88 89 90 91 92 93 94 95 96 97 98 99 100 101 102 103 104 105 106 107 108 109 110 111 112,
[87, size=2] 	 0.004245039 	  1 2 3 4 5 6 7 8 9 10 11 12 13 14 15 16 17 18 19 20 21 22 23 24 25 26 27 28 29 30 31 32 33 34 35 36 37 38 39 40 41 42 43 44 45 46 47 48 49 50 51 52 53 54 55 56 57 58 59 60 61 62 63 64 65 66 67 68 69 70 72 73 74 75 76 78 79 80 81 82 83 84 85 86 87 88 89 90 91 92 93 94 95 96 97 98 99 100 101 102 103 104 105 106 107 108 109 110 111 112,
[88, size=23] 	 0.0048954007 	  1 2 3 4 5 6 7 8 9 10 11 12 13 14 15 16 17 18 19 20 21 22 23 24 25 26 27 28 29 30 31 32 33 34 35 36 37 38 39 40 41 42 43 44 45 46 47 48 49 50 51 52 53 65 66 67 68 69 70 72 73 74 78 79 80 81 82 83 87 88 89 90 91 93 94 95 96 97 98 99 103 104 105 106 107 108 109 110 111,
[89, size=27] 	 5.6931406E-4 	  1 2 3 4 5 6 7 8 9 10 11 12 13 14 15 16 17 18 19 20 21 22 23 24 25 26 27 28 29 30 31 32 33 34 35 36 37 38 39 40 41 42 43 44 45 46 47 48 49 50 65 66 67 68 69 70 72 73 74 78 79 80 81 82 83 87 88 89 90 91 93 94 95 96 97 98 99 104 105 106 107 108 109 110 111,
[90, size=32] 	 0.01035362 	  1 2 3 4 5 6 7 8 9 10 11 12 13 14 15 16 17 18 19 20 21 22 23 24 25 26 27 28 29 30 31 32 33 34 35 36 37 38 39 40 41 42 43 44 45 46 47 48 65 66 67 68 69 70 72 73 74 78 79 80 81 82 83 87 88 89 90 93 94 95 96 97 98 104 105 106 107 108 109 111,
[91, size=1] 	 0.05846381 	  1 2 3 4 5 6 7 8 9 10 11 12 13 14 15 16 17 18 19 20 21 22 23 24 25 26 27 28 29 30 31 32 33 34 35 36 37 38 39 40 41 42 43 44 45 46 47 48 49 50 51 52 53 54 55 56 57 58 59 60 61 62 63 64 65 66 67 68 69 70 71 72 73 74 75 76 78 79 80 81 82 83 84 85 86 87 88 89 90 91 92 93 94 95 96 97 98 99 100 101 102 103 104 105 106 107 108 109 110 111 112,
[92, size=2] 	 0.04002736 	  1 2 3 4 5 6 7 8 9 10 11 12 13 14 15 16 17 18 19 20 21 22 23 24 25 26 27 28 29 30 31 32 33 34 35 36 37 38 39 40 41 42 43 44 45 46 47 48 49 50 51 52 53 54 55 56 57 58 59 60 61 62 63 64 65 66 67 68 69 70 71 72 73 74 76 78 79 80 81 82 83 84 85 86 87 88 89 90 91 92 93 94 95 96 97 98 99 100 101 102 103 104 105 106 107 108 109 110 111 112,
[93, size=3] 	 0.06464261 	  1 2 3 4 5 6 7 8 9 10 11 12 13 14 15 16 17 18 19 20 21 22 23 24 25 26 27 28 29 30 31 32 33 34 35 36 37 38 39 40 41 42 43 44 45 46 47 48 49 50 51 52 53 54 55 56 57 58 59 60 61 62 63 64 65 66 67 68 69 70 71 72 73 74 78 79 80 81 82 83 84 85 86 87 88 89 90 91 92 93 94 95 96 97 98 99 100 101 102 103 104 105 106 107 108 109 110 111 112,
[94, size=4] 	 0.011077234 	  1 2 3 4 5 6 7 8 9 10 11 12 13 14 15 16 17 18 19 20 21 22 23 24 25 26 27 28 29 30 31 32 33 34 35 36 37 38 39 40 41 42 43 44 45 46 47 48 49 50 51 52 53 54 55 56 57 58 59 60 61 62 63 64 65 66 67 68 69 70 71 72 73 74 78 79 80 81 82 83 85 86 87 88 89 90 91 92 93 94 95 96 97 98 99 100 101 102 103 104 105 106 107 108 109 110 111 112,
[95, size=5] 	 0.002822761 	  1 2 3 4 5 6 7 8 9 10 11 12 13 14 15 16 17 18 19 20 21 22 23 24 25 26 27 28 29 30 31 32 33 34 35 36 37 38 39 40 41 42 43 44 45 46 47 48 49 50 51 52 53 54 55 56 57 58 59 60 61 62 63 64 65 66 67 68 69 70 71 72 73 74 78 79 80 81 82 83 86 87 88 89 90 91 92 93 94 95 96 97 98 99 100 101 102 103 104 105 106 107 108 109 110 111 112,
[96, size=28] 	 0.021469109 	  1 2 3 4 5 6 7 8 9 10 11 12 13 14 15 16 17 18 19 20 21 22 23 24 25 26 27 28 29 30 31 32 33 34 35 36 37 38 39 40 41 42 43 44 45 46 47 48 65 66 67 68 69 70 71 72 73 74 78 79 80 81 82 83 87 88 89 90 91 93 94 95 96 97 98 99 104 105 106 107 108 109 110 111,
[97, size=34] 	 0.010491596 	  1 2 3 4 5 6 7 25 26 27 28 46 47 65 66 67 68 69 70 71 72 78 79 80 81 82 83 93 94 95 107 108 109 111,
[98, size=1] 	 0.11590711 	  1 2 3 4 5 6 7 8 9 10 11 12 13 14 15 16 17 18 19 20 21 22 23 24 25 26 27 28 29 30 31 32 33 34 35 36 37 38 39 40 41 42 43 44 45 46 47 48 49 50 51 52 53 54 55 56 57 58 59 60 61 62 63 64 65 66 67 68 69 70 71 72 73 74 76 77 78 79 80 81 82 83 84 85 86 87 88 89 90 91 92 93 94 95 96 97 98 99 100 101 102 103 104 105 106 107 108 109 110 111 112,
[99, size=6] 	 0.0023041845 	  1 2 3 4 5 6 7 8 9 10 11 12 13 14 15 16 17 18 19 20 21 22 23 24 25 26 27 28 29 30 31 32 33 34 35 36 37 38 39 40 41 42 43 44 45 46 47 48 49 50 51 52 53 54 55 56 57 58 59 60 61 62 63 64 65 66 67 68 69 70 71 72 73 74 77 78 79 80 81 82 83 87 88 89 90 91 93 94 95 96 97 98 99 100 101 102 103 104 105 106 107 108 109 110 111 112,
[100, size=21] 	 0.0045189485 	  1 2 3 4 5 6 7 8 9 10 11 12 13 14 15 16 17 18 19 20 21 22 23 24 25 26 27 28 29 30 31 32 33 34 35 36 37 38 39 40 41 42 43 44 45 46 47 48 49 50 51 52 53 65 66 67 68 69 70 71 72 73 74 77 78 79 80 81 82 83 87 88 89 90 91 93 94 95 96 97 98 99 103 104 105 106 107 108 109 110 111,
[101, size=1] 	 0.12764607 	  1 2 3 4 5 6 7 8 9 10 11 12 13 14 15 16 17 18 19 20 21 22 23 24 25 26 27 28 29 30 31 32 33 34 35 36 37 38 39 40 41 42 43 44 45 46 47 48 49 50 51 52 53 54 55 56 57 58 59 60 61 62 63 64 65 66 67 68 69 70 71 72 73 74 75 77 78 79 80 81 82 83 84 85 86 87 88 89 90 91 92 93 94 95 96 97 98 99 100 101 102 103 104 105 106 107 108 109 110 111 112,
[102, size=1] 	 0.039043855 	  1 2 3 4 5 6 7 8 9 10 11 12 13 14 15 16 17 18 19 20 21 22 23 24 25 26 27 28 29 30 31 32 33 34 35 36 37 38 39 40 41 42 43 44 45 46 47 48 49 50 51 52 53 54 55 56 57 58 59 60 61 62 63 64 65 66 67 68 69 70 71 72 73 74 75 76 77 78 79 80 81 82 83 85 86 87 88 89 90 91 92 93 94 95 96 97 98 99 100 101 102 103 104 105 106 107 108 109 110 111 112,
[103, size=3] 	 0.066292286 	  1 2 3 4 5 6 7 8 9 10 11 12 13 14 15 16 17 18 19 20 21 22 23 24 25 26 27 28 29 30 31 32 33 34 35 36 37 38 39 40 41 42 43 44 45 46 47 48 49 50 51 52 53 54 55 56 57 58 59 60 61 62 63 64 65 66 67 68 69 70 71 72 73 74 75 76 77 78 79 80 81 82 83 87 88 89 90 91 92 93 94 95 96 97 98 99 100 101 102 103 104 105 106 107 108 109 110 111 112,
[104, size=5] 	 0.005524868 	  1 2 3 4 5 6 7 8 9 10 11 12 13 14 15 16 17 18 19 20 21 22 23 24 25 26 27 28 29 30 31 32 33 34 35 36 37 38 39 40 41 42 43 44 45 46 47 48 49 50 51 52 53 54 55 56 57 58 59 60 61 62 63 64 65 66 67 68 69 70 71 72 73 74 75 76 77 78 79 80 81 82 83 87 88 89 90 91 93 94 95 96 97 98 99 100 101 103 104 105 106 107 108 109 110 111 112,
[105, size=1] 	 0.019143075 	  1 2 3 4 5 6 7 8 9 10 11 12 13 14 15 16 17 18 19 20 21 22 23 24 25 26 27 28 29 30 31 32 33 34 35 36 37 38 39 40 41 42 43 44 45 46 47 48 49 50 51 52 53 54 55 56 57 58 59 60 61 62 63 64 65 66 67 68 69 70 71 72 73 74 75 76 77 78 79 80 81 82 83 84 86 87 88 89 90 91 92 93 94 95 96 97 98 99 100 101 102 103 104 105 106 107 108 109 110 111 112,
[106, size=2] 	 0.026343644 	  1 2 3 4 5 6 7 8 9 10 11 12 13 14 15 16 17 18 19 20 21 22 23 24 25 26 27 28 29 30 31 32 33 34 35 36 37 38 39 40 41 42 43 44 45 46 47 48 49 50 51 52 53 54 55 56 57 58 59 60 61 62 63 64 65 66 67 68 69 70 71 72 73 74 75 76 77 78 79 80 81 82 83 84 87 88 89 90 91 92 93 94 95 96 97 98 99 100 101 102 103 104 105 106 107 108 109 110 111 112,
[107, size=4] 	 0.0019308616 	  1 2 3 4 5 6 7 8 9 10 11 12 13 14 15 16 17 18 19 20 21 22 23 24 25 26 27 28 29 30 31 32 33 34 35 36 37 38 39 40 41 42 43 44 45 46 47 48 49 50 51 52 53 54 55 56 57 58 59 60 61 62 63 64 65 66 67 68 69 70 71 72 73 74 75 76 77 78 79 80 81 82 83 84 87 88 89 90 91 93 94 95 96 97 98 99 100 101 103 104 105 106 107 108 109 110 111 112,
[108, size=1] 	 0.015778562 	  1 2 3 4 5 6 7 8 9 10 11 12 13 14 15 16 17 18 19 20 21 22 23 24 25 26 27 28 29 30 31 32 33 34 35 36 37 38 39 40 41 42 43 44 45 46 47 48 49 50 51 52 53 54 55 56 57 58 59 60 61 62 63 64 65 66 67 68 69 70 71 72 73 74 75 76 77 78 79 80 81 82 83 84 85 87 88 89 90 91 92 93 94 95 96 97 98 99 100 101 102 103 104 105 106 107 108 109 110 111 112,
[109, size=2] 	 0.0038502486 	  1 2 3 4 5 6 7 8 9 10 11 12 13 14 15 16 17 18 19 20 21 22 23 24 25 26 27 28 29 30 31 32 33 34 35 36 37 38 39 40 41 42 43 44 45 46 47 48 49 50 51 52 53 54 55 56 57 58 59 60 61 62 63 64 65 66 67 68 69 70 71 72 73 74 75 76 77 78 79 80 81 82 83 84 85 87 88 89 90 91 93 94 95 96 97 98 99 100 101 102 103 104 105 106 107 108 109 110 111 112,
[110, size=4] 	 0.0012652583 	  1 2 3 4 5 6 7 8 9 10 11 12 13 14 15 16 17 18 19 20 21 22 23 24 25 26 27 28 29 30 31 32 33 34 35 36 37 38 39 40 41 42 43 44 45 46 47 48 49 50 51 52 53 54 55 56 57 58 59 60 61 62 63 64 65 66 67 68 69 70 71 72 73 74 75 76 77 78 79 80 81 82 83 84 85 87 88 89 90 91 93 94 95 96 97 98 99 100 103 104 105 106 107 108 109 110 111 112,
[111, size=1] 	 0.10775249 	  1 2 3 4 5 6 7 8 9 10 11 12 13 14 15 16 17 18 19 20 21 22 23 24 25 26 27 28 29 30 31 32 33 34 35 36 37 38 39 40 41 42 43 44 45 46 47 48 49 50 51 52 53 54 55 56 57 58 59 60 61 62 63 64 65 66 67 68 69 70 71 72 73 74 75 76 77 78 79 80 81 82 83 84 85 86 87 88 89 90 91 93 94 95 96 97 98 99 100 101 102 103 104 105 106 107 108 109 110 111 112,
[112, size=3] 	 3.2385456E-4 	  1 2 3 4 5 6 7 8 9 10 11 12 13 14 15 16 17 18 19 20 21 22 23 24 25 26 27 28 29 30 31 32 33 34 35 36 37 38 39 40 41 42 43 44 45 46 47 48 49 50 51 52 53 54 55 56 57 58 59 60 61 62 63 64 65 66 67 68 69 70 71 72 73 74 75 76 77 78 79 80 81 82 83 84 85 86 87 88 89 90 91 93 94 95 96 97 98 99 100 103 104 105 106 107 108 109 110 111 112,
[113, size=4] 	 0.022140633 	  1 2 3 4 5 6 7 8 9 10 11 12 13 14 15 16 17 18 19 20 21 22 23 24 25 26 27 28 29 30 31 32 33 34 35 36 37 38 39 40 41 42 43 44 45 46 47 48 49 50 51 52 53 54 55 56 57 58 59 60 61 62 63 64 65 66 67 68 69 70 71 72 73 74 75 76 77 78 79 80 81 82 83 84 85 86 87 88 89 90 91 93 94 95 96 97 98 99 103 104 105 106 107 108 109 110 111 112,
[114, size=1] 	 0.03397008 	  1 2 3 4 5 6 7 8 9 10 11 12 13 14 15 16 17 18 19 20 21 22 23 24 25 26 27 28 29 30 31 32 33 34 35 36 37 38 39 40 41 42 43 44 45 46 47 48 49 50 51 52 53 54 55 56 57 58 59 60 61 62 63 64 65 66 67 68 69 70 71 72 73 74 75 76 77 78 79 80 81 82 83 84 85 86 87 88 89 90 91 92 93 94 95 96 97 98 99 100 101 103 104 105 106 107 108 109 110 111 112,
[115, size=2] 	 0.01235288 	  1 2 3 4 5 6 7 8 9 10 11 12 13 14 15 16 17 18 19 20 21 22 23 24 25 26 27 28 29 30 31 32 33 34 35 36 37 38 39 40 41 42 43 44 45 46 47 48 49 50 51 52 53 54 55 56 57 58 59 60 61 62 63 64 65 66 67 68 69 70 71 72 73 74 75 76 77 78 79 80 81 82 83 84 85 86 87 88 89 90 91 92 93 94 95 96 97 98 99 100 103 104 105 106 107 108 109 110 111 112,
[116, size=3] 	 0.028033614 	  1 2 3 4 5 6 7 8 9 10 11 12 13 14 15 16 17 18 19 20 21 22 23 24 25 26 27 28 29 30 31 32 33 34 35 36 37 38 39 40 41 42 43 44 45 46 47 48 49 50 51 52 53 54 55 56 57 58 59 60 61 62 63 64 65 66 67 68 69 70 71 72 73 74 75 76 77 78 79 80 81 82 83 84 85 86 87 88 89 90 91 92 93 94 95 96 97 98 99 103 104 105 106 107 108 109 110 111 112,
[117, size=11] 	 0.0051712464 	  1 2 3 4 5 6 7 8 9 10 11 12 13 14 15 16 17 18 19 20 21 22 23 24 25 26 27 28 29 30 31 32 33 34 35 36 37 38 39 40 41 42 43 44 45 46 47 48 49 50 51 52 53 54 55 56 57 65 66 67 68 69 70 71 72 73 74 75 76 77 78 79 80 81 82 83 84 85 86 87 88 89 90 91 92 93 94 95 96 97 98 99 103 104 105 106 107 108 109 110 111,
[118, size=14] 	 0.0032595962 	  1 2 3 4 5 6 7 8 9 10 11 12 13 14 15 16 17 18 19 20 21 22 23 24 25 26 27 28 29 30 31 32 33 34 35 36 37 38 39 40 41 42 43 44 45 46 47 48 49 50 51 52 53 57 65 66 67 68 69 70 71 72 73 74 75 76 77 78 79 80 81 82 83 84 85 86 87 88 89 90 91 92 93 94 95 96 97 98 99 103 104 105 106 107 108 109 110 111,
[119, size=15] 	 0.0121248355 	  1 2 3 4 5 6 7 8 9 10 11 12 13 14 15 16 17 18 19 20 21 22 23 24 25 26 27 28 29 30 31 32 33 34 35 36 37 38 39 40 41 42 43 44 45 46 47 48 49 50 51 52 53 65 66 67 68 69 70 71 72 73 74 75 76 77 78 79 80 81 82 83 84 85 86 87 88 89 90 91 92 93 94 95 96 97 98 99 103 104 105 106 107 108 109 110 111,
[120, size=22] 	 0.015957829 	  1 2 3 4 5 6 7 8 9 10 11 12 13 14 15 16 17 18 19 20 21 22 23 24 25 26 27 28 29 30 31 32 33 34 35 36 37 38 39 40 41 42 43 44 45 46 47 48 65 66 67 68 69 70 71 72 73 74 75 76 77 78 79 80 81 82 83 84 85 86 87 88 89 90 91 92 93 94 95 96 97 98 99 104 105 106 107 108 109 111,
[121, size=1] 	 0.060693827 	  1 2 3 4 5 6 7 8 9 10 11 12 13 14 15 16 17 18 19 20 21 22 23 24 25 26 27 28 29 30 31 32 33 34 35 36 37 38 39 40 41 42 43 44 45 46 47 48 49 50 51 52 53 54 55 56 57 58 59 60 61 62 63 64 65 66 67 68 69 70 71 72 73 74 75 76 77 78 79 80 81 82 83 84 85 86 87 88 89 90 91 92 93 94 95 96 97 98 99 100 102 103 104 105 106 107 108 109 110 111 112,
[122, size=2] 	 0.019941093 	  1 2 3 4 5 6 7 8 9 10 11 12 13 14 15 16 17 18 19 20 21 22 23 24 25 26 27 28 29 30 31 32 33 34 35 36 37 38 39 40 41 42 43 44 45 46 47 48 49 50 51 52 53 54 55 56 57 58 59 60 61 62 63 64 65 66 67 68 69 70 71 72 73 74 75 76 77 78 79 80 81 82 83 84 85 86 87 88 89 90 91 92 93 94 95 96 97 98 99 102 103 104 105 106 107 108 109 110 111 112,
[123, size=4] 	 0.004876455 	  1 2 3 4 5 6 7 8 9 10 11 12 13 14 15 16 17 18 19 20 21 22 23 24 25 26 27 28 29 30 31 32 33 34 35 36 37 38 39 40 41 42 43 44 45 46 47 48 49 50 51 52 53 54 55 56 57 58 59 60 61 62 64 65 66 67 68 69 70 71 72 73 74 75 76 77 78 79 80 81 82 83 84 85 86 87 88 89 90 91 92 93 94 95 96 97 98 99 102 103 104 105 106 107 108 109 110 111,
[124, size=12] 	 0.0014825991 	  1 2 3 4 5 6 7 8 9 10 11 12 13 14 15 16 17 18 19 20 21 22 23 24 25 26 27 28 29 30 31 32 33 34 35 36 37 38 39 40 41 42 43 44 45 46 47 48 49 50 51 52 53 55 57 65 66 67 68 69 70 71 72 73 74 75 76 77 78 79 80 81 82 83 84 85 86 87 88 89 90 91 92 93 94 95 96 97 98 99 102 103 104 105 106 107 108 109 110 111,
[125, size=13] 	 0.0013477468 	  1 2 3 4 5 6 7 8 9 10 11 12 13 14 15 16 17 18 19 20 21 22 23 24 25 26 27 28 29 30 31 32 33 34 35 36 37 38 39 40 41 42 43 44 45 46 47 48 49 50 51 52 53 57 65 66 67 68 69 70 71 72 73 74 75 76 77 78 79 80 81 82 83 84 85 86 87 88 89 90 91 92 93 94 95 96 97 98 99 102 103 104 105 106 107 108 109 110 111,
[126, size=1] 	 0.03586575 	  1 2 3 4 5 6 7 8 9 10 11 12 13 14 15 16 17 18 19 20 21 22 23 24 25 26 27 28 29 30 31 32 33 34 35 36 37 38 39 40 41 42 43 44 45 46 47 48 49 50 51 52 53 54 55 56 57 58 59 60 61 62 63 64 65 66 67 68 69 70 71 72 73 74 75 76 77 78 79 80 81 82 83 84 85 86 87 88 89 90 91 92 93 94 95 96 97 98 99 101 102 103 104 105 106 107 108 109 110 111 112,
[127, size=12] 	 0.0037739482 	  1 2 3 4 5 6 7 8 9 10 11 12 13 14 15 16 17 18 19 20 21 22 23 24 25 26 27 28 29 30 31 32 33 34 35 36 37 38 39 40 41 42 43 44 45 46 47 48 49 50 51 52 53 57 65 66 67 68 69 70 71 72 73 74 75 76 77 78 79 80 81 82 83 84 85 86 87 88 89 90 91 92 93 94 95 96 97 98 99 101 102 103 104 105 106 107 108 109 110 111,
[128, size=13] 	 3.82919E-4 	  1 2 3 4 5 6 7 8 9 10 11 12 13 14 15 16 17 18 19 20 21 22 23 24 25 26 27 28 29 30 31 32 33 34 35 36 37 38 39 40 41 42 43 44 45 46 47 48 49 50 51 52 53 65 66 67 68 69 70 71 72 73 74 75 76 77 78 79 80 81 82 83 84 85 86 87 88 89 90 91 92 93 94 95 96 97 98 99 101 102 103 104 105 106 107 108 109 110 111,
[129, size=20] 	 0.005143768 	  1 2 3 4 5 6 7 8 9 10 11 12 13 14 15 16 17 18 19 20 21 22 23 24 25 26 27 28 29 30 31 32 33 34 35 36 37 38 39 40 41 42 43 44 45 46 47 48 65 66 67 68 69 70 71 72 73 74 75 76 77 78 79 80 81 82 83 84 85 86 87 88 89 90 91 92 93 94 95 96 97 98 99 101 102 104 105 106 107 108 109 111,
[130, size=1] 	 0.13544844 	  1 2 3 4 5 6 7 8 9 10 11 12 13 14 15 16 17 18 19 20 21 22 23 24 25 26 27 28 29 30 31 32 33 34 35 36 37 38 39 40 41 42 43 44 45 46 47 48 49 50 51 52 53 54 55 56 57 58 59 60 61 62 63 64 65 66 67 68 69 70 71 72 73 74 75 76 77 78 79 80 81 82 83 84 85 86 87 88 89 90 91 92 93 94 95 96 97 98 99 100 101 102 103 104 105 106 107 108 109 110 111,
[131, size=4] 	 0.003595248 	  1 2 3 4 5 6 7 8 9 10 11 12 13 14 15 16 17 18 19 20 21 22 23 24 25 26 27 28 29 30 31 32 33 34 35 36 37 38 39 40 41 42 43 44 45 46 47 48 49 50 51 52 53 54 55 56 57 58 59 60 61 65 66 67 68 69 70 71 72 73 74 75 76 77 78 79 80 81 82 83 84 85 86 87 88 89 90 91 92 93 94 95 96 97 98 99 100 101 102 103 104 105 106 107 108 109 110 111,
[132, size=8] 	 0.008589539 	  1 2 3 4 5 6 7 8 9 10 11 12 13 14 15 16 17 18 19 20 21 22 23 24 25 26 27 28 29 30 31 32 33 34 35 36 37 38 39 40 41 42 43 44 45 46 47 48 49 50 51 52 53 54 55 56 57 65 66 67 68 69 70 71 72 73 74 75 76 77 78 79 80 81 82 83 84 85 86 87 88 89 90 91 92 93 94 95 96 97 98 99 100 101 102 103 104 105 106 107 108 109 110 111,
[133, size=20] 	 0.0066855014 	  1 2 3 4 5 6 7 8 9 10 11 12 13 14 15 16 17 18 19 20 21 22 23 24 25 26 27 28 29 30 31 32 33 34 35 36 37 38 39 40 41 42 43 44 45 46 47 48 65 66 67 68 69 70 71 72 73 74 75 76 77 78 79 80 81 82 83 84 85 86 87 88 89 90 92 93 94 95 96 97 98 99 100 101 102 104 105 106 107 108 109 111,
[134, size=1] 	 0.0457621 	  1 2 3 4 5 6 7 8 9 10 11 12 13 14 15 16 17 18 19 20 21 22 23 24 25 26 27 28 29 30 31 32 33 34 35 36 37 38 39 40 41 42 43 44 45 46 47 48 49 50 51 52 53 54 55 56 57 58 59 60 61 62 64 65 66 67 68 69 70 71 72 73 74 75 76 77 78 79 80 81 82 83 84 85 86 87 88 89 90 91 92 93 94 95 96 97 98 99 100 101 102 103 104 105 106 107 108 109 110 111 112,
[135, size=2] 	 0.02856939 	  1 2 3 4 5 6 7 8 9 10 11 12 13 14 15 16 17 18 19 20 21 22 23 24 25 26 27 28 29 30 31 32 33 34 35 36 37 38 39 40 41 42 43 44 45 46 47 48 49 50 51 52 53 54 55 56 57 58 59 60 61 62 65 66 67 68 69 70 71 72 73 74 75 76 77 78 79 80 81 82 83 84 85 86 87 88 89 90 91 92 93 94 95 96 97 98 99 100 101 102 103 104 105 106 107 108 109 110 111 112,
[136, size=3] 	 0.032835048 	  1 2 3 4 5 6 7 8 9 10 11 12 13 14 15 16 17 18 19 20 21 22 23 24 25 26 27 28 29 30 31 32 33 34 35 36 37 38 39 40 41 42 43 44 45 46 47 48 49 50 51 52 53 54 55 56 57 58 59 60 61 65 66 67 68 69 70 71 72 73 74 75 76 77 78 79 80 81 82 83 84 85 86 87 88 89 90 91 92 93 94 95 96 97 98 99 100 101 102 103 104 105 106 107 108 109 110 111 112,
[137, size=6] 	 0.002534039 	  1 2 3 4 5 6 7 8 9 10 11 12 13 14 15 16 17 18 19 20 21 22 23 24 25 26 27 28 29 30 31 32 33 34 35 36 37 38 39 40 41 42 43 44 45 46 47 48 49 50 51 52 53 54 55 56 57 60 65 66 67 68 69 70 71 72 73 74 75 76 77 78 79 80 81 82 83 84 85 86 87 88 89 90 91 92 93 94 95 96 97 98 99 100 101 102 103 104 105 106 107 108 109 110 111 112,
[138, size=7] 	 0.003814352 	  1 2 3 4 5 6 7 8 9 10 11 12 13 14 15 16 17 18 19 20 21 22 23 24 25 26 27 28 29 30 31 32 33 34 35 36 37 38 39 40 41 42 43 44 45 46 47 48 49 50 51 52 53 54 55 56 57 65 66 67 68 69 70 71 72 73 74 75 76 77 78 79 80 81 82 83 84 85 86 87 88 89 90 91 92 93 94 95 96 97 98 99 100 101 102 103 104 105 106 107 108 109 110 111 112,
[139, size=10] 	 0.004846711 	  1 2 3 4 5 6 7 8 9 10 11 12 13 14 15 16 17 18 19 20 21 22 23 24 25 26 27 28 29 30 31 32 33 34 35 36 37 38 39 40 41 42 43 44 45 46 47 48 49 50 51 52 53 57 65 66 67 68 69 70 71 72 73 74 75 76 77 78 79 80 81 82 83 84 85 86 87 88 89 90 91 92 93 94 95 96 97 98 99 100 101 102 103 104 105 106 107 108 109 110 111 112,
[140, size=11] 	 0.010402589 	  1 2 3 4 5 6 7 8 9 10 11 12 13 14 15 16 17 18 19 20 21 22 23 24 25 26 27 28 29 30 31 32 33 34 35 36 37 38 39 40 41 42 43 44 45 46 47 48 49 50 51 52 53 65 66 67 68 69 70 71 72 73 74 75 76 77 78 79 80 81 82 83 84 85 86 87 88 89 90 91 92 93 94 95 96 97 98 99 100 101 102 103 104 105 106 107 108 109 110 111 112,
[141, size=17] 	 0.001210161 	  1 2 3 4 5 6 7 8 9 10 11 12 13 14 15 16 17 18 19 20 21 22 23 24 25 26 27 28 29 30 31 32 33 34 35 36 37 38 39 40 41 42 43 44 45 46 47 48 65 66 67 68 69 70 71 72 73 74 75 76 77 78 79 80 81 82 83 84 85 86 87 88 89 90 91 92 93 94 95 96 97 98 99 100 101 102 104 105 106 107 108 109 110 111 112,
[142, size=22] 	 0.0046846047 	  1 2 3 4 5 6 7 8 9 10 11 12 13 14 15 16 17 18 19 20 21 22 23 24 25 26 27 28 29 30 31 32 33 34 35 36 37 38 39 40 41 42 43 44 45 46 47 48 65 66 67 68 69 70 71 72 73 74 75 76 77 78 79 80 81 82 83 84 85 86 87 88 89 90 92 93 94 95 96 100 101 102 104 105 106 107 108 109 111 112,
[143, size=1] 	 0.032143265 	  1 2 3 4 5 6 7 8 9 10 11 12 13 14 15 16 17 18 19 20 21 22 23 24 25 26 27 28 29 30 31 32 33 34 35 36 37 38 39 40 41 42 43 44 45 46 47 48 49 50 51 52 53 54 55 56 57 58 59 60 61 62 63 65 66 67 68 69 70 71 72 73 74 75 76 77 78 79 80 81 82 83 84 85 86 87 88 89 90 91 92 93 94 95 96 97 98 99 100 101 102 103 104 105 106 107 108 109 110 111 112,
[144, size=2] 	 0.0025213072 	  1 2 3 4 5 6 7 8 9 10 11 12 13 14 15 16 17 18 19 20 21 22 23 24 25 26 27 28 29 30 31 32 33 34 35 36 37 38 39 40 41 42 43 44 45 46 47 48 49 50 51 52 53 54 55 56 57 58 59 60 61 63 65 66 67 68 69 70 71 72 73 74 75 76 77 78 79 80 81 82 83 84 85 86 87 88 89 90 91 92 93 94 95 96 97 98 99 100 101 102 103 104 105 106 107 108 109 110 111 112,
[145, size=3] 	 0.010509572 	  1 2 3 4 5 6 7 8 9 10 11 12 13 14 15 16 17 18 19 20 21 22 23 24 25 26 27 28 29 30 31 32 33 34 35 36 37 38 39 40 41 42 43 44 45 46 47 48 49 50 51 52 53 54 55 56 57 59 60 61 63 65 66 67 68 69 70 71 72 73 74 75 76 77 78 79 80 81 82 83 84 85 86 87 88 89 90 91 92 93 94 95 96 97 98 99 100 101 102 103 104 105 106 107 108 109 110 111 112,
[146, size=9] 	 0.001388992 	  1 2 3 4 5 6 7 8 9 10 11 12 13 14 15 16 17 18 19 20 21 22 23 24 25 26 27 28 29 30 31 32 33 34 35 36 37 38 39 40 41 42 43 44 45 46 47 48 49 50 51 52 53 57 63 65 66 67 68 69 70 71 72 73 74 75 76 77 78 79 80 81 82 83 84 85 86 87 88 89 90 91 92 93 94 95 96 97 98 99 100 101 102 103 104 105 106 107 108 109 110 111 112,
[147, size=10] 	 0.003622898 	  1 2 3 4 5 6 7 8 9 10 11 12 13 14 15 16 17 18 19 20 21 22 23 24 25 26 27 28 29 30 31 32 33 34 35 36 37 38 39 40 41 42 43 44 45 46 47 48 49 50 51 52 53 63 65 66 67 68 69 70 71 72 73 74 75 76 77 78 79 80 81 82 83 84 85 86 87 88 89 90 91 92 93 94 95 96 97 98 99 100 101 102 103 104 105 106 107 108 109 110 111 112,
[148, size=1] 	 0.040999107 	  1 2 3 4 5 6 7 8 9 10 11 12 13 14 15 16 17 18 19 20 21 22 23 24 25 26 27 28 29 30 31 32 33 34 35 36 37 38 39 40 41 42 43 44 45 46 47 48 49 50 51 52 53 54 55 56 57 58 59 60 61 63 64 65 66 67 68 69 70 71 72 73 74 75 76 77 78 79 80 81 82 83 84 85 86 87 88 89 90 91 92 93 94 95 96 97 98 99 100 101 102 103 104 105 106 107 108 109 110 111 112,
[149, size=2] 	 0.0025612281 	  1 2 3 4 5 6 7 8 9 10 11 12 13 14 15 16 17 18 19 20 21 22 23 24 25 26 27 28 29 30 31 32 33 34 35 36 37 38 39 40 41 42 43 44 45 46 47 48 49 50 51 52 53 54 55 56 57 59 60 61 63 64 65 66 67 68 69 70 71 72 73 74 75 76 77 78 79 80 81 82 83 84 85 86 87 88 89 90 91 92 93 94 95 96 97 98 99 100 101 102 103 104 105 106 107 108 109 110 111 112,
[150, size=3] 	 0.0038895158 	  1 2 3 4 5 6 7 8 9 10 11 12 13 14 15 16 17 18 19 20 21 22 23 24 25 26 27 28 29 30 31 32 33 34 35 36 37 38 39 40 41 42 43 44 45 46 47 48 49 50 51 52 53 54 55 56 57 60 61 63 64 65 66 67 68 69 70 71 72 73 74 75 76 77 78 79 80 81 82 83 84 85 86 87 88 89 90 91 92 93 94 95 96 97 98 99 100 101 102 103 104 105 106 107 108 109 110 111 112,
[151, size=1] 	 0.047811702 	  1 2 3 4 5 6 7 8 9 10 11 12 13 14 15 16 17 18 19 20 21 22 23 24 25 26 27 28 29 30 31 32 33 34 35 36 37 38 39 40 41 42 43 44 45 46 47 48 49 50 51 52 53 54 55 56 57 59 60 61 62 63 64 65 66 67 68 69 70 71 72 73 74 75 76 77 78 79 80 81 82 83 84 85 86 87 88 89 90 91 92 93 94 95 96 97 98 99 100 101 102 103 104 105 106 107 108 109 110 111 112,
[152, size=2] 	 0.01008257 	  1 2 3 4 5 6 7 8 9 10 11 12 13 14 15 16 17 18 19 20 21 22 23 24 25 26 27 28 29 30 31 32 33 34 35 36 37 38 39 40 41 42 43 44 45 46 47 48 49 50 51 52 53 54 55 56 57 60 61 62 63 64 65 66 67 68 69 70 71 72 73 74 75 76 77 78 79 80 81 82 83 84 85 86 87 88 89 90 91 92 93 94 95 96 97 98 99 100 101 102 103 104 105 106 107 108 109 110 111 112,
[153, size=3] 	 4.7836945E-4 	  1 2 3 4 5 6 7 8 9 10 11 12 13 14 15 16 17 18 19 20 21 22 23 24 25 26 27 28 29 30 31 32 33 34 35 36 37 38 39 40 41 42 43 44 45 46 47 48 49 50 51 52 53 54 55 56 57 60 62 63 64 65 66 67 68 69 70 71 72 73 74 75 76 77 78 79 80 81 82 83 84 85 86 87 88 89 90 91 92 93 94 95 96 97 98 99 100 101 102 103 104 105 106 107 108 109 110 111 112,
[154, size=4] 	 0.020934401 	  1 2 3 4 5 6 7 8 9 10 11 12 13 14 15 16 17 18 19 20 21 22 23 24 25 26 27 28 29 30 31 32 33 34 35 36 37 38 39 40 41 42 43 44 45 46 47 48 49 50 51 52 53 54 55 56 57 62 63 64 65 66 67 68 69 70 71 72 73 74 75 76 77 78 79 80 81 82 83 84 85 86 87 88 89 90 91 92 93 94 95 96 97 98 99 100 101 102 103 104 105 106 107 108 109 110 111 112,
[155, size=6] 	 0.0049906867 	  1 2 3 4 5 6 7 8 9 10 11 12 13 14 15 16 17 18 19 20 21 22 23 24 25 26 27 28 29 30 31 32 33 34 35 36 37 38 39 40 41 42 43 44 45 46 47 48 49 50 51 52 53 55 57 62 63 64 65 66 67 68 69 70 71 72 73 74 75 76 77 78 79 80 81 82 83 84 85 86 87 88 89 90 91 92 93 94 95 96 97 98 99 100 101 102 103 104 105 106 107 108 109 110 111 112,
[156, size=1] 	 0.056683116 	  1 2 3 4 5 6 7 8 9 10 11 12 13 14 15 16 17 18 19 20 21 22 23 24 25 26 27 28 29 30 31 32 33 34 35 36 37 38 39 40 41 42 43 44 45 46 47 48 49 50 51 52 53 54 55 56 57 58 60 61 62 63 64 65 66 67 68 69 70 71 72 73 74 75 76 77 78 79 80 81 82 83 84 85 86 87 88 89 90 91 92 93 94 95 96 97 98 99 100 101 102 103 104 105 106 107 108 109 110 111 112,
[157, size=2] 	 0.0043840357 	  1 2 3 4 5 6 7 8 9 10 11 12 13 14 15 16 17 18 19 20 21 22 23 24 25 26 27 28 29 30 31 32 33 34 35 36 37 38 39 40 41 42 43 44 45 46 47 48 49 50 51 52 53 54 55 56 57 58 60 62 63 64 65 66 67 68 69 70 71 72 73 74 75 76 77 78 79 80 81 82 83 84 85 86 87 88 89 90 91 92 93 94 95 96 97 98 99 100 101 102 103 104 105 106 107 108 109 110 111 112,
[158, size=1] 	 0.036188513 	  1 2 3 4 5 6 7 8 9 10 11 12 13 14 15 16 17 18 19 20 21 22 23 24 25 26 27 28 29 30 31 32 33 34 35 36 37 38 39 40 41 42 43 44 45 46 47 48 49 50 51 52 53 54 55 56 57 58 59 60 62 63 64 65 66 67 68 69 70 71 72 73 74 75 76 77 78 79 80 81 82 83 84 85 86 87 88 89 90 91 92 93 94 95 96 97 98 99 100 101 102 103 104 105 106 107 108 109 110 111 112,
[159, size=2] 	 0.012827037 	  1 2 3 4 5 6 7 8 9 10 11 12 13 14 15 16 17 18 19 20 21 22 23 24 25 26 27 28 29 30 31 32 33 34 35 36 37 38 39 40 41 42 43 44 45 46 47 48 49 50 51 52 53 54 55 56 57 58 59 62 63 64 65 66 67 68 69 70 71 72 73 74 75 76 77 78 79 80 81 82 83 84 85 86 87 88 89 90 91 92 93 94 95 96 97 98 99 100 101 102 103 104 105 106 107 108 109 110 111 112,
[160, size=1] 	 0.049727093 	  1 2 3 4 5 6 7 8 9 10 11 12 13 14 15 16 17 18 19 20 21 22 23 24 25 26 27 28 29 30 31 32 33 34 35 36 37 38 39 40 41 42 43 44 45 46 47 48 49 50 51 52 53 54 55 56 57 58 59 61 62 63 64 65 66 67 68 69 70 71 72 73 74 75 76 77 78 79 80 81 82 83 84 85 86 87 88 89 90 91 92 93 94 95 96 97 98 99 100 101 102 103 104 105 106 107 108 109 110 111 112,
[161, size=2] 	 5.647189E-4 	  1 2 3 4 5 6 7 8 9 10 11 12 13 14 15 16 17 18 19 20 21 22 23 24 25 26 27 28 29 30 31 32 33 34 35 36 37 38 39 40 41 42 43 44 45 46 47 48 49 50 51 52 53 54 55 57 58 59 61 62 63 64 65 66 67 68 69 70 71 72 73 74 75 76 77 78 79 80 81 82 83 84 85 86 87 88 89 90 91 92 93 94 95 96 97 98 99 100 101 102 103 104 105 106 107 108 109 110 111 112,
[162, size=4] 	 0.0033320987 	  1 2 3 4 5 6 7 8 9 10 11 12 13 14 15 16 17 18 19 20 21 22 23 24 25 26 27 28 29 30 31 32 33 34 35 36 37 38 39 40 41 42 43 44 45 46 47 48 49 50 51 52 53 57 58 59 61 62 63 64 65 66 67 68 69 70 71 72 73 74 75 76 77 78 79 80 81 82 83 84 85 86 87 88 89 90 91 92 93 94 95 96 97 98 99 100 101 102 103 104 105 106 107 108 109 110 111 112,
[163, size=1] 	 0.037017025 	  1 2 3 4 5 6 7 8 9 10 11 12 13 14 15 16 17 18 19 20 21 22 23 24 25 26 27 28 29 30 31 32 33 34 35 36 37 38 39 40 41 42 43 44 45 46 47 48 49 50 51 52 53 54 55 57 58 59 60 61 62 63 64 65 66 67 68 69 70 71 72 73 74 75 76 77 78 79 80 81 82 83 84 85 86 87 88 89 90 91 92 93 94 95 96 97 98 99 100 101 102 103 104 105 106 107 108 109 110 111 112,
[164, size=2] 	 0.0023854 	  1 2 3 4 5 6 7 8 9 10 11 12 13 14 15 16 17 18 19 20 21 22 23 24 25 26 27 28 29 30 31 32 33 34 35 36 37 38 39 40 41 42 43 44 45 46 47 48 49 50 51 52 53 55 57 58 59 60 61 62 63 64 65 66 67 68 69 70 71 72 73 74 75 76 77 78 79 80 81 82 83 84 85 86 87 88 89 90 91 92 93 94 95 96 97 98 99 100 101 102 103 104 105 106 107 108 109 110 111 112,
[165, size=4] 	 0.057137325 	  1 2 3 4 5 6 7 8 9 10 11 12 13 14 15 16 17 18 19 20 21 22 23 24 25 26 27 28 29 30 31 32 33 34 35 36 37 38 39 40 41 42 43 44 45 46 47 48 49 50 51 52 53 58 59 60 61 62 63 64 65 66 67 68 69 70 71 72 73 74 75 76 77 78 79 80 81 82 83 84 85 86 87 88 89 90 91 92 93 94 95 96 97 98 99 100 101 102 103 104 105 106 107 108 109 110 111 112,
[166, size=1] 	 0.05529879 	  1 2 3 4 5 6 7 8 9 10 11 12 13 14 15 16 17 18 19 20 21 22 23 24 25 26 27 28 29 30 31 32 33 34 35 36 37 38 39 40 41 42 43 44 45 46 47 48 49 50 51 52 53 55 56 57 58 59 60 61 62 63 64 65 66 67 68 69 70 71 72 73 74 75 76 77 78 79 80 81 82 83 84 85 86 87 88 89 90 91 92 93 94 95 96 97 98 99 100 101 102 103 104 105 106 107 108 109 110 111 112,
[167, size=2] 	 0.022301564 	  1 2 3 4 5 6 7 8 9 10 11 12 13 14 15 16 17 18 19 20 21 22 23 24 25 26 27 28 29 30 31 32 33 34 35 36 37 38 39 40 41 42 43 44 45 46 47 48 49 50 51 52 53 56 57 58 59 60 61 62 63 64 65 66 67 68 69 70 71 72 73 74 75 76 77 78 79 80 81 82 83 84 85 86 87 88 89 90 91 92 93 94 95 96 97 98 99 100 101 102 103 104 105 106 107 108 109 110 111 112,
[168, size=1] 	 0.021370703 	  1 2 3 4 5 6 7 8 9 10 11 12 13 14 15 16 17 18 19 20 21 22 23 24 25 26 27 28 29 30 31 32 33 34 35 36 37 38 39 40 41 42 43 44 45 46 47 48 49 50 51 52 53 54 56 57 58 59 60 61 62 63 64 65 66 67 68 69 70 71 72 73 74 75 76 77 78 79 80 81 82 83 84 85 86 87 88 89 90 91 92 93 94 95 96 97 98 99 100 101 102 103 104 105 106 107 108 109 110 111 112,
[169, size=2] 	 0.009106565 	  1 2 3 4 5 6 7 8 9 10 11 12 13 14 15 16 17 18 19 20 21 22 23 24 25 26 27 28 29 30 31 32 33 34 35 36 37 38 39 40 41 42 43 44 45 46 47 48 49 50 51 52 53 54 56 58 59 60 61 62 63 64 65 66 67 68 69 70 71 72 73 74 75 76 77 78 79 80 81 82 83 84 85 86 87 88 89 90 91 92 93 94 95 96 97 98 99 100 101 102 103 104 105 106 107 108 109 110 111 112,
[170, size=1] 	 0.009167357 	  1 2 3 4 5 6 7 8 9 10 11 12 13 14 15 16 17 18 19 20 21 22 23 24 25 26 27 28 29 30 31 32 33 34 35 36 37 38 39 40 41 42 43 44 45 46 47 48 49 50 51 52 53 54 55 56 58 59 60 61 62 63 64 65 66 67 68 69 70 71 72 73 74 75 76 77 78 79 80 81 82 83 84 85 86 87 88 89 90 91 92 93 94 95 96 97 98 99 100 101 102 103 104 105 106 107 108 109 110 111 112,
[171, size=2] 	 0.010291262 	  1 2 3 4 5 6 7 8 9 10 11 12 13 14 15 16 17 18 19 20 21 22 23 24 25 26 27 28 29 30 31 32 33 34 35 36 37 38 39 40 41 42 43 44 45 46 47 48 49 50 51 52 53 54 55 56 58 59 60 61 62 63 64 65 66 67 68 69 70 71 72 73 74 75 76 77 78 79 80 81 82 83 84 85 86 87 88 89 90 91 92 93 94 95 96 97 98 99 100 101 102 104 105 106 107 108 109 110 111 112,
[172, size=4] 	 0.010291547 	  1 2 3 4 5 6 7 8 9 10 11 12 13 14 15 16 17 18 19 20 21 22 23 24 25 26 27 28 29 30 31 32 33 34 35 36 37 38 39 40 41 42 43 44 45 46 47 48 49 50 51 54 55 56 58 59 60 61 62 63 64 65 66 67 68 69 70 71 72 73 74 75 76 77 78 79 80 81 82 83 84 85 86 87 88 89 90 91 92 93 94 95 96 97 98 99 100 101 102 104 105 106 107 108 109 110 111 112,
[173, size=1] 	 0.06856258 	  1 2 3 4 5 6 7 8 9 10 11 12 13 14 15 16 17 18 19 20 21 22 23 24 25 26 27 28 29 30 31 32 33 34 35 36 37 38 39 40 41 42 43 44 45 46 47 48 49 50 51 52 53 54 55 56 57 58 59 60 61 62 63 64 65 66 67 68 69 70 71 72 73 74 75 76 77 78 79 80 81 82 83 84 85 86 87 88 89 90 91 92 93 94 95 96 97 98 99 100 101 102 104 105 106 107 108 109 110 111 112,
[174, size=2] 	 0.0012204166 	  1 2 3 4 5 6 7 8 9 10 11 12 13 14 15 16 17 18 19 20 21 22 23 24 25 26 27 28 29 30 31 32 33 34 35 36 37 38 39 40 41 42 43 44 45 46 47 48 49 50 51 53 54 55 56 57 58 59 60 61 62 63 64 65 66 67 68 69 70 71 72 73 74 75 76 77 78 79 80 81 82 83 84 85 86 87 88 89 90 91 92 93 94 95 96 97 98 99 100 101 102 104 105 106 107 108 109 110 111 112,
[175, size=3] 	 0.002610204 	  1 2 3 4 5 6 7 8 9 10 11 12 13 14 15 16 17 18 19 20 21 22 23 24 25 26 27 28 29 30 31 32 33 34 35 36 37 38 39 40 41 42 43 44 45 46 47 48 49 50 51 54 55 56 57 58 59 60 61 62 63 64 65 66 67 68 69 70 71 72 73 74 75 76 77 78 79 80 81 82 83 84 85 86 87 88 89 90 91 92 93 94 95 96 97 98 99 100 101 102 104 105 106 107 108 109 110 111 112,
[176, size=1] 	 0.032930367 	  1 2 3 4 5 6 7 8 9 10 11 12 13 14 15 16 17 18 19 20 21 22 23 24 25 26 27 28 29 30 31 32 33 34 35 36 37 38 39 40 41 42 43 44 45 46 47 48 49 50 51 53 54 55 56 57 58 59 60 61 62 63 64 65 66 67 68 69 70 71 72 73 74 75 76 77 78 79 80 81 82 83 84 85 86 87 88 89 90 91 92 93 94 95 96 97 98 99 100 101 102 103 104 105 106 107 108 109 110 111 112,
[177, size=3] 	 0.0012686265 	  1 2 3 4 5 6 7 8 9 10 11 12 13 14 15 16 17 18 19 20 21 22 23 24 25 26 27 28 29 30 31 32 33 34 35 36 37 38 39 40 41 42 43 44 45 46 47 48 49 50 54 55 56 57 58 59 60 61 62 63 64 65 66 67 68 69 70 71 72 73 74 75 76 77 78 79 80 81 82 83 84 85 86 87 88 89 90 91 92 93 94 95 96 97 98 99 100 101 102 103 104 105 106 107 108 109 110 111 112,
[178, size=5] 	 0.059955373 	  1 2 3 4 5 6 7 8 9 10 11 12 13 14 15 16 17 18 19 20 21 22 23 24 25 26 27 28 29 30 31 32 33 34 35 36 37 38 39 40 41 42 43 44 45 46 47 48 54 55 56 57 58 59 60 61 62 63 64 65 66 67 68 69 70 71 72 73 74 75 76 77 78 79 80 81 82 83 84 85 86 87 88 89 90 91 92 93 94 95 96 97 98 99 100 101 102 103 104 105 106 107 108 109 110 111 112,
[179, size=50] 	 0.0034479848 	  1 2 3 4 5 6 7 19 25 26 27 28 45 46 47 48 54 55 56 57 58 59 60 61 62 63 64 65 66 67 68 69 70 71 72 75 76 77 78 79 80 81 82 83 84 85 86 92 93 94 95 100 101 102 103 104 105 107 108 109 111 112,
[180, size=1] 	 0.03388229 	  1 2 3 4 5 6 7 8 9 10 11 12 13 14 15 16 17 18 19 20 21 22 23 24 25 26 27 28 29 30 31 32 33 34 35 36 37 38 39 40 41 42 43 44 45 46 47 48 49 50 51 52 54 55 56 57 58 59 60 61 62 63 64 65 66 67 68 69 70 71 72 73 74 75 76 77 78 79 80 81 82 83 84 85 86 87 88 89 90 91 92 93 94 95 96 97 98 99 100 101 102 103 104 105 106 107 108 109 110 111 112,
[181, size=2] 	 0.0027877812 	  1 2 3 4 5 6 7 8 9 10 11 12 13 14 15 16 17 18 19 20 21 22 23 24 25 26 27 28 29 30 31 32 33 34 35 36 37 38 39 40 41 42 43 44 45 46 47 48 49 50 52 54 55 56 57 58 59 60 61 62 63 64 65 66 67 68 69 70 71 72 73 74 75 76 77 78 79 80 81 82 83 84 85 86 87 88 89 90 91 92 93 94 95 96 97 98 99 100 101 102 103 104 105 106 107 108 109 110 111 112,
[182, size=3] 	 7.942598E-4 	  1 2 3 4 5 6 7 8 9 10 11 12 13 14 15 16 17 18 19 20 21 22 23 24 25 26 27 28 29 30 31 32 33 34 35 36 37 38 39 40 41 42 43 44 45 46 47 48 49 52 54 55 56 57 58 59 60 61 62 63 64 65 66 67 68 69 70 71 72 73 74 75 76 77 78 79 80 81 82 83 84 85 86 87 88 89 90 91 92 93 94 95 96 97 98 99 100 101 102 103 104 105 106 107 108 109 110 111 112,
[183, size=1] 	 0.031977594 	  1 2 3 4 5 6 7 8 9 10 11 12 13 14 15 16 17 18 19 20 21 22 23 24 25 26 27 28 29 30 31 32 33 34 35 36 37 38 39 40 41 42 43 44 45 46 47 48 49 50 52 53 54 55 56 57 58 59 60 61 62 63 64 65 66 67 68 69 70 71 72 73 74 75 76 77 78 79 80 81 82 83 84 85 86 87 88 89 90 91 92 93 94 95 96 97 98 99 100 101 102 103 104 105 106 107 108 109 110 111 112,
[184, size=2] 	 0.011923777 	  1 2 3 4 5 6 7 8 9 10 11 12 13 14 15 16 17 18 19 20 21 22 23 24 25 26 27 28 29 30 31 32 33 34 35 36 37 38 39 40 41 42 43 44 45 46 47 48 49 52 53 54 55 56 57 58 59 60 61 62 63 64 65 66 67 68 69 70 71 72 73 74 75 76 77 78 79 80 81 82 83 84 85 86 87 88 89 90 91 92 93 94 95 96 97 98 99 100 101 102 103 104 105 106 107 108 109 110 111 112,
[185, size=1] 	 0.058774423 	  1 2 3 4 5 6 7 8 9 10 11 12 13 14 15 16 17 18 19 20 21 22 23 24 25 26 27 28 29 30 31 32 33 34 35 36 37 38 39 40 41 42 43 44 45 46 47 48 49 51 52 53 54 55 56 57 58 59 60 61 62 63 64 65 66 67 68 69 70 71 72 73 74 75 76 77 78 79 80 81 82 83 84 85 86 87 88 89 90 91 92 93 94 95 96 97 98 99 100 101 102 103 104 105 106 107 108 109 110 111 112,
[186, size=1] 	 0.083642535 	  1 2 3 4 5 6 7 8 9 10 11 12 13 14 15 16 17 18 19 20 21 22 23 24 25 26 27 28 29 30 31 32 33 34 35 36 37 38 39 40 41 42 43 44 45 46 47 48 50 51 52 53 54 55 56 57 58 59 60 61 62 63 64 65 66 67 68 69 70 71 72 73 74 75 76 77 78 79 80 81 82 83 84 85 86 87 88 89 90 91 92 93 94 95 96 97 98 99 100 101 102 103 104 105 106 107 108 109 110 111 112,
[187, size=1] 	 0.112240024 	  1 2 3 4 5 6 7 8 9 10 11 12 13 14 15 16 17 18 19 20 21 22 23 24 25 26 27 28 29 30 31 32 33 34 35 36 37 38 39 40 41 42 43 44 45 46 47 48 49 50 51 52 53 54 55 56 57 58 59 60 61 62 63 64 65 66 67 68 69 70 71 72 73 74 75 76 77 78 79 80 81 82 83 84 85 86 87 88 89 90 91 92 93 94 95 96 97 98 99 100 101 102 103 104 105 106 107 108 109 111 112,
[188, size=2] 	 0.004319421 	  1 2 3 4 5 6 7 8 9 10 11 12 13 14 15 16 17 18 19 20 21 22 23 24 25 26 27 28 29 30 31 32 33 34 35 36 37 38 39 40 41 42 43 44 45 46 47 48 49 50 51 52 53 54 55 56 57 58 59 60 61 62 63 64 65 66 67 68 69 70 71 72 73 74 75 76 77 78 79 80 81 82 83 84 85 86 87 88 89 90 92 93 94 95 96 97 98 99 100 101 102 103 104 105 106 107 108 109 111 112,
[189, size=1] 	 0.084549256 	  1 2 3 4 5 6 7 8 9 10 11 12 13 14 15 16 17 18 19 20 21 22 23 24 25 26 27 28 29 30 31 32 33 34 35 36 37 38 39 40 41 42 43 44 45 46 47 48 49 50 51 52 53 54 55 56 57 58 59 60 61 62 63 64 65 66 67 68 69 70 71 72 73 74 75 76 77 78 79 80 81 82 83 84 85 86 87 88 89 90 92 93 94 95 96 97 98 99 100 101 102 103 104 105 106 107 108 109 110 111 112,
[190, size=3] 	 0.010343752 	  1 2 3 4 5 6 7 8 9 10 11 12 13 14 15 16 17 18 19 20 21 22 23 24 25 26 27 28 29 30 31 32 33 34 35 36 37 38 39 40 41 42 43 44 45 46 47 48 49 50 51 52 53 54 55 56 57 58 59 60 61 62 63 64 65 66 67 68 69 70 71 72 73 74 75 76 77 78 79 80 81 82 83 84 85 86 87 88 89 90 92 93 94 95 96 97 100 101 102 103 104 105 106 107 108 109 110 111 112,
[191, size=5] 	 0.0036143777 	  1 2 3 4 5 6 7 8 9 10 11 12 13 14 15 16 17 18 19 20 21 22 23 24 25 26 27 28 29 30 31 32 33 34 35 36 37 38 39 41 42 43 44 45 46 47 48 49 50 51 52 53 54 55 56 57 58 59 60 61 62 63 64 65 66 67 68 69 70 71 72 73 74 75 76 77 78 79 80 81 82 83 84 85 86 87 88 89 90 92 93 94 95 96 100 101 102 103 104 105 106 107 108 109 110 111 112,
[192, size=1] 	 0.062429614 	  1 2 3 4 5 6 7 8 9 10 11 12 13 14 15 16 17 18 19 20 21 22 23 24 25 26 27 28 29 30 31 32 33 34 35 36 37 38 39 40 41 42 43 44 45 46 47 48 49 50 51 52 53 54 55 56 57 58 59 60 61 62 63 64 65 66 67 68 69 70 71 72 73 74 75 76 77 78 79 80 81 82 83 84 85 86 87 88 89 90 91 92 93 94 95 96 97 98 100 101 102 103 104 105 106 107 108 109 110 111 112,
[193, size=3] 	 0.03693491 	  1 2 3 4 5 6 7 8 9 10 11 12 13 14 15 16 17 18 19 20 21 22 23 24 25 26 27 28 29 30 31 32 33 34 35 36 37 38 39 40 41 42 43 44 45 46 47 48 49 50 51 52 53 54 55 56 57 58 59 60 61 62 63 64 65 66 67 68 69 70 71 72 73 74 75 76 77 78 79 80 81 82 83 84 85 86 87 88 89 90 91 92 93 94 95 96 100 101 102 103 104 105 106 107 108 109 110 111 112,
[194, size=1] 	 0.026333291 	  1 2 3 4 5 6 7 8 9 10 11 12 13 14 15 16 17 18 19 20 21 22 23 24 25 26 27 28 29 30 31 32 33 34 35 36 37 38 39 40 41 42 43 44 45 46 47 48 49 50 51 52 53 54 55 56 57 58 59 60 61 62 63 64 65 66 67 68 69 70 71 72 73 74 75 76 77 78 79 80 81 82 83 84 85 86 87 88 89 90 91 92 93 94 95 96 97 99 100 101 102 103 104 105 106 107 108 109 110 111 112,
[195, size=2] 	 0.012744739 	  1 2 3 4 5 6 7 8 9 10 11 12 13 14 15 16 17 18 19 20 21 22 23 24 25 26 27 28 29 30 31 32 33 34 35 36 37 38 39 40 41 42 43 44 45 46 47 48 49 50 51 52 53 54 55 56 57 58 59 60 61 62 63 64 65 66 67 68 69 70 71 72 73 74 75 76 77 78 79 80 81 82 83 84 85 86 87 88 89 90 91 92 93 94 95 96 99 100 101 102 103 104 105 106 107 108 109 110 111 112,
[196, size=1] 	 0.049601916 	  1 2 3 4 5 6 7 8 9 10 11 12 13 14 15 16 17 18 19 20 21 22 23 24 25 26 27 28 29 30 31 32 33 34 35 36 37 38 39 40 41 42 43 44 45 46 47 48 49 50 51 52 53 54 55 56 57 58 59 60 61 62 63 64 65 66 67 68 69 70 71 72 73 74 75 76 77 78 79 80 81 82 83 84 85 86 87 88 89 90 91 92 93 94 95 96 98 99 100 101 102 103 104 105 106 107 108 109 110 111 112,
[197, size=17] 	 0.0026121144 	  1 2 3 4 5 6 7 8 9 10 11 12 13 14 15 16 17 18 19 20 21 22 23 24 25 26 27 28 37 45 46 47 48 49 50 51 52 53 54 55 56 57 58 59 60 61 62 63 64 65 66 67 68 69 70 71 72 73 74 75 76 77 78 79 80 81 82 83 84 85 86 87 88 89 90 91 92 93 94 95 98 99 100 101 102 103 104 105 106 107 108 109 110 111 112,
[198, size=18] 	 0.003082369 	  1 2 3 4 5 6 7 8 9 10 11 12 13 14 15 16 17 18 19 20 21 22 23 24 25 26 27 28 45 46 47 48 49 50 51 52 53 54 55 56 57 58 59 60 61 62 63 64 65 66 67 68 69 70 71 72 73 74 75 76 77 78 79 80 81 82 83 84 85 86 87 88 89 90 91 92 93 94 95 98 99 100 101 102 103 104 105 106 107 108 109 110 111 112,
[199, size=1] 	 0.07353129 	  1 2 3 4 5 6 7 8 9 10 11 12 13 14 15 16 17 18 19 20 21 22 23 24 25 26 27 28 29 30 31 32 33 34 35 36 37 38 39 41 42 43 44 45 46 47 48 49 50 51 52 53 54 55 56 57 58 59 60 61 62 63 64 65 66 67 68 69 70 71 72 73 74 75 76 77 78 79 80 81 82 83 84 85 86 87 88 89 90 91 92 93 94 95 96 97 98 99 100 101 102 103 104 105 106 107 108 109 110 111 112,
[200, size=2] 	 0.030360356 	  1 2 3 4 5 6 7 8 9 10 11 12 13 14 15 16 17 18 19 20 21 22 23 24 25 26 27 28 29 30 31 32 33 34 35 36 37 38 39 42 43 44 45 46 47 48 49 50 51 52 53 54 55 56 57 58 59 60 61 62 63 64 65 66 67 68 69 70 71 72 73 74 75 76 77 78 79 80 81 82 83 84 85 86 87 88 89 90 91 92 93 94 95 96 97 98 99 100 101 102 103 104 105 106 107 108 109 110 111 112,
[201, size=3] 	 0.0015806472 	  1 2 3 4 5 6 7 8 9 10 11 12 13 14 15 16 17 18 19 20 21 22 23 24 25 26 27 28 29 30 31 32 33 34 35 36 37 38 42 43 44 45 46 47 48 49 50 51 52 53 54 55 56 57 58 59 60 61 62 63 64 65 66 67 68 69 70 71 72 73 74 75 76 77 78 79 80 81 82 83 84 85 86 87 88 89 90 91 92 93 94 95 96 97 98 99 100 101 102 103 104 105 106 107 108 109 110 111 112,
[202, size=7] 	 0.0014891219 	  1 2 3 4 5 6 7 8 9 10 11 12 13 14 15 16 17 18 19 20 21 22 23 24 25 26 27 28 31 32 33 34 37 38 42 43 44 45 46 47 48 49 50 51 52 53 54 55 56 57 58 59 60 61 62 63 64 65 66 67 68 69 70 71 72 73 74 75 76 77 78 79 80 81 82 83 84 85 86 87 88 89 90 91 92 93 94 95 96 97 98 99 100 101 102 103 104 105 106 107 108 109 110 111 112,
[203, size=11] 	 0.0013740684 	  1 2 3 4 5 6 7 8 9 10 11 12 13 14 15 16 17 18 19 20 21 22 23 24 25 26 27 28 33 37 38 42 43 44 45 46 47 48 49 50 51 52 53 54 55 56 57 58 59 60 61 62 63 64 65 66 67 68 69 70 71 72 73 74 75 76 77 78 79 80 81 82 83 84 85 86 87 88 89 90 91 92 93 94 95 97 98 99 100 101 102 103 104 105 106 107 108 109 110 111 112,
[204, size=12] 	 0.00171026 	  1 2 3 4 5 6 7 8 9 10 11 12 13 14 15 16 17 18 19 20 21 22 23 24 25 26 27 28 33 37 38 42 44 45 46 47 48 49 50 51 52 53 54 55 56 57 58 59 60 61 62 63 64 65 66 67 68 69 70 71 72 73 74 75 76 77 78 79 80 81 82 83 84 85 86 87 88 89 90 91 92 93 94 95 97 98 99 100 101 102 103 104 105 106 107 108 109 110 111 112,
[205, size=15] 	 0.014213869 	  1 2 3 4 5 6 7 8 9 10 11 12 13 14 15 16 17 18 19 20 21 22 23 24 25 26 27 28 37 38 45 46 47 48 49 50 51 52 53 54 55 56 57 58 59 60 61 62 63 64 65 66 67 68 69 70 71 72 73 74 75 76 77 78 79 80 81 82 83 84 85 86 87 88 89 90 91 92 93 94 95 97 98 99 100 101 102 103 104 105 106 107 108 109 110 111 112,
[206, size=16] 	 0.003960869 	  1 2 3 4 5 6 7 8 9 10 11 12 13 14 15 16 17 18 19 20 21 22 23 24 25 26 27 28 37 45 46 47 48 49 50 51 52 53 54 55 56 57 58 59 60 61 62 63 64 65 66 67 68 69 70 71 72 73 74 75 76 77 78 79 80 81 82 83 84 85 86 87 88 89 90 91 92 93 94 95 97 98 99 100 101 102 103 104 105 106 107 108 109 110 111 112,
[207, size=17] 	 0.021115128 	  1 2 3 4 5 6 7 8 9 10 11 12 13 14 15 16 17 18 19 20 21 22 23 24 25 26 27 28 45 46 47 48 49 50 51 52 53 54 55 56 57 58 59 60 61 62 63 64 65 66 67 68 69 70 71 72 73 74 75 76 77 78 79 80 81 82 83 84 85 86 87 88 89 90 91 92 93 94 95 97 98 99 100 101 102 103 104 105 106 107 108 109 110 111 112,
[208, size=33] 	 0.0021605194 	  1 2 3 4 5 6 7 10 17 18 19 20 21 23 24 25 26 27 28 45 46 47 48 49 50 51 52 53 54 55 56 57 58 59 60 61 62 63 64 65 66 67 68 69 70 71 72 75 76 77 78 79 80 81 82 83 84 85 86 91 92 93 94 95 97 98 99 100 101 102 103 104 105 107 108 109 110 111 112,
[209, size=36] 	 0.0057224547 	  1 2 3 4 5 6 7 17 19 21 23 24 25 26 27 28 45 46 47 48 49 50 51 52 53 54 55 56 57 58 59 60 61 62 63 64 65 66 67 68 69 70 71 72 75 76 77 78 79 80 81 82 83 84 85 86 91 92 93 94 95 97 98 99 100 101 102 103 104 105 107 108 109 110 111 112,
[210, size=41] 	 0.0033258838 	  1 2 3 4 5 6 7 25 26 27 28 45 46 47 48 49 50 51 52 53 54 55 56 57 58 59 60 61 62 63 64 65 66 67 68 69 70 71 72 75 76 77 78 79 80 81 82 83 84 85 86 91 92 93 94 95 97 98 99 100 101 102 103 104 105 107 108 109 110 111 112,
[211, size=1] 	 0.07194687 	  1 2 3 4 5 6 7 8 9 10 11 12 13 14 15 16 17 18 19 20 21 22 23 24 25 26 27 28 29 30 31 32 33 34 35 36 37 38 39 40 42 43 44 45 46 47 48 49 50 51 52 53 54 55 56 57 58 59 60 61 62 63 64 65 66 67 68 69 70 71 72 73 74 75 76 77 78 79 80 81 82 83 84 85 86 87 88 89 90 91 92 93 94 95 96 97 98 99 100 101 102 103 104 105 106 107 108 109 110 111 112,
[212, size=12] 	 0.0018194981 	  1 2 3 4 5 6 7 8 9 10 11 12 13 14 15 16 17 18 19 20 21 22 23 24 25 26 27 28 33 37 38 40 42 45 46 47 48 49 50 51 52 53 54 55 56 57 58 59 60 61 62 63 64 65 66 67 68 69 70 71 72 73 74 75 76 77 78 79 80 81 82 83 84 85 86 87 88 89 90 91 92 93 94 95 97 98 99 100 101 102 103 104 105 106 107 108 109 110 111 112,
[213, size=13] 	 0.0035640046 	  1 2 3 4 5 6 7 8 9 10 11 12 13 14 15 16 17 18 19 20 21 22 23 24 25 26 27 28 33 37 38 40 45 46 47 48 49 50 51 52 53 54 55 56 57 58 59 60 61 62 63 64 65 66 67 68 69 70 71 72 73 74 75 76 77 78 79 80 81 82 83 84 85 86 87 88 89 90 91 92 93 94 95 97 98 99 100 101 102 103 104 105 106 107 108 109 110 111 112,
[214, size=15] 	 0.0071112853 	  1 2 3 4 5 6 7 8 9 10 11 12 13 14 15 16 17 18 19 20 21 22 23 24 25 26 27 28 37 40 45 46 47 48 49 50 51 52 53 54 55 56 57 58 59 60 61 62 63 64 65 66 67 68 69 70 71 72 73 74 75 76 77 78 79 80 81 82 83 84 85 86 87 88 89 90 91 92 93 94 95 97 98 99 100 101 102 103 104 105 106 107 108 109 110 111 112,
[215, size=16] 	 0.008700065 	  1 2 3 4 5 6 7 8 9 10 11 12 13 14 15 16 17 18 19 20 21 22 23 24 25 26 27 28 40 45 46 47 48 49 50 51 52 53 54 55 56 57 58 59 60 61 62 63 64 65 66 67 68 69 70 71 72 73 74 75 76 77 78 79 80 81 82 83 84 85 86 87 88 89 90 91 92 93 94 95 97 98 99 100 101 102 103 104 105 106 107 108 109 110 111 112,
[216, size=1] 	 0.038648143 	  1 2 3 4 5 6 7 8 9 10 11 12 13 14 15 16 17 18 19 20 21 22 23 24 25 26 27 28 29 30 31 32 33 34 35 36 37 38 40 41 42 43 44 45 46 47 48 49 50 51 52 53 54 55 56 57 58 59 60 61 62 63 64 65 66 67 68 69 70 71 72 73 74 75 76 77 78 79 80 81 82 83 84 85 86 87 88 89 90 91 92 93 94 95 96 97 98 99 100 101 102 103 104 105 106 107 108 109 110 111 112,
[217, size=2] 	 0.005933493 	  1 2 3 4 5 6 7 8 9 10 11 12 13 14 15 16 17 18 19 20 21 22 23 24 25 26 27 28 29 30 31 32 33 34 36 37 38 40 41 42 43 44 45 46 47 48 49 50 51 52 53 54 55 56 57 58 59 60 61 62 63 64 65 66 67 68 69 70 71 72 73 74 75 76 77 78 79 80 81 82 83 84 85 86 87 88 89 90 91 92 93 94 95 96 97 98 99 100 101 102 103 104 105 106 107 108 109 110 111 112,
[218, size=1] 	 0.021188168 	  1 2 3 4 5 6 7 8 9 10 11 12 13 14 15 16 17 18 19 20 21 22 23 24 25 26 27 28 29 30 31 32 33 34 36 37 38 39 40 41 42 43 44 45 46 47 48 49 50 51 52 53 54 55 56 57 58 59 60 61 62 63 64 65 66 67 68 69 70 71 72 73 74 75 76 77 78 79 80 81 82 83 84 85 86 87 88 89 90 91 92 93 94 95 96 97 98 99 100 101 102 103 104 105 106 107 108 109 110 111 112,
[219, size=2] 	 0.026596578 	  1 2 3 4 5 6 7 8 9 10 11 12 13 14 15 16 17 18 19 20 21 22 23 24 25 26 27 28 29 30 31 32 33 34 37 38 39 40 41 42 43 44 45 46 47 48 49 50 51 52 53 54 55 56 57 58 59 60 61 62 63 64 65 66 67 68 69 70 71 72 73 74 75 76 77 78 79 80 81 82 83 84 85 86 87 88 89 90 91 92 93 94 95 96 97 98 99 100 101 102 103 104 105 106 107 108 109 110 111 112,
[220, size=3] 	 0.0028552448 	  1 2 3 4 5 6 7 8 9 10 11 12 13 14 15 16 17 18 19 20 21 22 23 24 25 26 27 28 30 31 32 33 34 37 38 39 40 41 42 43 44 45 46 47 48 49 50 51 52 53 54 55 56 57 58 59 60 61 62 63 64 65 66 67 68 69 70 71 72 73 74 75 76 77 78 79 80 81 82 83 84 85 86 87 88 89 90 91 92 93 94 95 96 97 98 99 100 101 102 103 104 105 106 107 108 109 110 111 112,
[221, size=14] 	 0.0036205119 	  1 2 3 4 5 6 7 8 9 10 11 12 13 14 15 16 17 18 19 20 21 22 23 24 25 26 27 28 39 40 41 45 46 47 48 49 50 51 52 53 54 55 56 57 58 59 60 61 62 63 64 65 66 67 68 69 70 71 72 73 74 75 76 77 78 79 80 81 82 83 84 85 86 87 88 89 90 91 92 93 94 95 97 98 99 100 101 102 103 104 105 106 107 108 109 110 111 112,
[222, size=1] 	 0.026800247 	  1 2 3 4 5 6 7 8 9 10 11 12 13 14 15 16 17 18 19 20 21 22 23 24 25 26 27 28 29 30 31 32 33 34 35 37 38 39 40 41 42 43 44 45 46 47 48 49 50 51 52 53 54 55 56 57 58 59 60 61 62 63 64 65 66 67 68 69 70 71 72 73 74 75 76 77 78 79 80 81 82 83 84 85 86 87 88 89 90 91 92 93 94 95 96 97 98 99 100 101 102 103 104 105 106 107 108 109 110 111 112,
[223, size=3] 	 0.0010322753 	  1 2 3 4 5 6 7 8 9 10 11 12 13 14 15 16 17 18 19 20 21 22 23 24 25 26 27 28 31 32 33 34 35 37 38 39 40 41 42 43 44 45 46 47 48 49 50 51 52 53 54 55 56 57 58 59 60 61 62 63 64 65 66 67 68 69 70 71 72 73 74 75 76 77 78 79 80 81 82 83 84 85 86 87 88 89 90 91 92 93 94 95 96 97 98 99 100 101 102 103 104 105 106 107 108 109 110 111 112,
[224, size=8] 	 0.0019448098 	  1 2 3 4 5 6 7 8 9 10 11 12 13 14 15 16 17 18 19 20 21 22 23 24 25 26 27 28 33 35 37 38 39 40 41 42 44 45 46 47 48 49 50 51 52 53 54 55 56 57 58 59 60 61 62 63 64 65 66 67 68 69 70 71 72 73 74 75 76 77 78 79 80 81 82 83 84 85 86 87 88 89 90 91 92 93 94 95 97 98 99 100 101 102 103 104 105 106 107 108 109 110 111 112,
[225, size=9] 	 0.0011826736 	  1 2 3 4 5 6 7 8 9 10 11 12 13 14 15 16 17 18 19 20 21 22 23 24 25 26 27 28 33 35 37 38 39 40 41 42 45 46 47 48 49 50 51 52 53 54 55 56 57 58 59 60 61 62 63 64 65 66 67 68 69 70 71 72 73 74 75 76 77 78 79 80 81 82 83 84 85 86 87 88 89 90 91 92 93 94 95 97 98 99 100 101 102 103 104 105 106 107 108 109 110 111 112,
[226, size=10] 	 0.0017119992 	  1 2 3 4 5 6 7 8 9 10 11 12 13 14 15 16 17 18 19 20 21 22 23 24 25 26 27 28 33 35 37 38 39 40 41 45 46 47 48 49 50 51 52 53 54 55 56 57 58 59 60 61 62 63 64 65 66 67 68 69 70 71 72 73 74 75 76 77 78 79 80 81 82 83 84 85 86 87 88 89 90 91 92 93 94 95 97 98 99 100 101 102 103 104 105 106 107 108 109 110 111 112,
[227, size=1] 	 0.04879275 	  1 2 3 4 5 6 7 8 9 10 11 12 13 14 15 16 17 18 19 20 21 22 23 24 25 26 27 28 30 31 32 33 34 35 36 37 38 39 40 41 42 43 44 45 46 47 48 49 50 51 52 53 54 55 56 57 58 59 60 61 62 63 64 65 66 67 68 69 70 71 72 73 74 75 76 77 78 79 80 81 82 83 84 85 86 87 88 89 90 91 92 93 94 95 96 97 98 99 100 101 102 103 104 105 106 107 108 109 110 111 112,
[228, size=2] 	 0.015799914 	  1 2 3 4 5 6 7 8 9 10 11 12 13 14 15 16 17 18 19 20 21 22 23 24 25 26 27 28 31 32 33 34 35 36 37 38 39 40 41 42 43 44 45 46 47 48 49 50 51 52 53 54 55 56 57 58 59 60 61 62 63 64 65 66 67 68 69 70 71 72 73 74 75 76 77 78 79 80 81 82 83 84 85 86 87 88 89 90 91 92 93 94 95 96 97 98 99 100 101 102 103 104 105 106 107 108 109 110 111 112,
[229, size=11] 	 1.2343538E-4 	  1 2 3 4 5 6 7 8 9 10 11 12 13 14 15 16 17 18 19 20 21 22 23 24 25 26 27 28 35 36 37 39 40 41 45 46 47 48 49 50 51 52 53 54 55 56 57 58 59 60 61 62 63 64 65 66 67 68 69 70 71 72 73 74 75 76 77 78 79 80 81 82 83 84 85 86 87 88 89 90 91 92 93 94 95 97 98 99 100 101 102 103 104 105 106 107 108 109 110 111 112,
[230, size=1] 	 0.038568992 	  1 2 3 4 5 6 7 8 9 10 11 12 13 14 15 16 17 18 19 20 21 22 23 24 25 26 27 28 29 31 32 33 34 35 36 37 38 39 40 41 42 43 44 45 46 47 48 49 50 51 52 53 54 55 56 57 58 59 60 61 62 63 64 65 66 67 68 69 70 71 72 73 74 75 76 77 78 79 80 81 82 83 84 85 86 87 88 89 90 91 92 93 94 95 96 97 98 99 100 101 102 103 104 105 106 107 108 109 110 111 112,
[231, size=2] 	 0.010460891 	  1 2 3 4 5 6 7 8 9 10 11 12 13 14 15 16 17 18 19 20 21 22 23 24 25 26 27 28 29 31 32 33 34 35 36 37 38 39 40 41 42 43 44 45 46 47 48 49 50 51 52 53 54 55 56 57 58 59 60 61 62 63 64 65 66 67 68 69 70 71 72 73 74 75 76 77 78 79 80 81 82 83 84 85 86 87 88 89 90 91 92 93 94 95 97 98 99 100 101 102 103 104 105 106 107 108 109 110 111 112,
[232, size=5] 	 0.005240555 	  1 2 3 4 5 6 7 8 9 10 11 12 13 14 15 16 17 18 19 20 21 22 23 24 25 26 27 28 29 33 35 36 37 38 39 40 41 42 43 44 45 46 47 48 49 50 51 52 53 54 55 56 57 58 59 60 61 62 63 64 65 66 67 68 69 70 71 72 73 74 75 76 77 78 79 80 81 82 83 84 85 86 87 88 89 90 91 92 93 94 95 97 98 99 100 101 102 103 104 105 106 107 108 109 110 111 112,
[233, size=7] 	 6.1603605E-5 	  1 2 3 4 5 6 7 8 9 10 11 12 13 14 15 16 17 18 19 20 21 22 23 24 25 26 27 28 29 33 35 36 37 38 39 40 41 42 45 46 47 48 49 50 51 52 53 54 55 56 57 58 59 60 61 62 63 64 65 66 67 68 69 70 71 72 73 74 75 76 77 78 79 80 81 82 83 84 85 86 87 88 89 90 91 92 93 94 95 97 98 99 100 101 102 103 104 105 106 107 108 109 110 111 112,
[234, size=9] 	 0.0010069939 	  1 2 3 4 5 6 7 8 9 10 11 12 13 14 15 16 17 18 19 20 21 22 23 24 25 26 27 28 29 35 36 37 38 39 40 41 45 46 47 48 49 50 51 52 53 54 55 56 57 58 59 60 61 62 63 64 65 66 67 68 69 70 71 72 73 74 75 76 77 78 79 80 81 82 83 84 85 86 87 88 89 90 91 92 93 94 95 97 98 99 100 101 102 103 104 105 106 107 108 109 110 111 112,
[235, size=1] 	 0.112352096 	  1 2 3 4 5 6 7 8 9 10 11 12 13 14 15 16 17 18 19 20 21 22 23 24 25 26 27 28 29 30 31 32 33 34 35 36 37 38 39 40 41 42 43 44 45 46 47 48 49 50 51 52 53 54 55 56 57 58 59 60 61 62 63 64 65 66 67 68 69 70 71 72 73 74 75 76 77 78 79 80 81 82 83 84 85 86 87 88 89 90 91 92 93 94 95 97 98 99 100 101 102 103 104 105 106 107 108 109 110 111 112,
[236, size=2] 	 0.0023372266 	  1 2 3 4 5 6 7 8 9 10 11 12 13 14 15 16 17 18 19 20 21 22 23 24 25 26 27 28 29 30 31 32 33 35 36 37 38 39 40 41 42 43 44 45 46 47 48 49 50 51 52 53 54 55 56 57 58 59 60 61 62 63 64 65 66 67 68 69 70 71 72 73 74 75 76 77 78 79 80 81 82 83 84 85 86 87 88 89 90 91 92 93 94 95 97 98 99 100 101 102 103 104 105 106 107 108 109 110 111 112,
[237, size=1] 	 0.037761874 	  1 2 3 4 5 6 7 8 9 10 11 12 13 14 15 16 17 18 19 20 21 22 23 24 25 26 27 28 29 30 31 32 33 35 36 37 38 39 40 41 42 43 44 45 46 47 48 49 50 51 52 53 54 55 56 57 58 59 60 61 62 63 64 65 66 67 68 69 70 71 72 73 74 75 76 77 78 79 80 81 82 83 84 85 86 87 88 89 90 91 92 93 94 95 96 97 98 99 100 101 102 103 104 105 106 107 108 109 110 111 112,
[238, size=2] 	 0.013611931 	  1 2 3 4 5 6 7 8 9 10 11 12 13 14 15 16 17 18 19 20 21 22 23 24 25 26 27 28 29 30 32 33 35 36 37 38 39 40 41 42 43 44 45 46 47 48 49 50 51 52 53 54 55 56 57 58 59 60 61 62 63 64 65 66 67 68 69 70 71 72 73 74 75 76 77 78 79 80 81 82 83 84 85 86 87 88 89 90 91 92 93 94 95 96 97 98 99 100 101 102 103 104 105 106 107 108 109 110 111 112,
[239, size=9] 	 0.007915773 	  1 2 3 4 5 6 7 8 9 10 11 12 13 14 15 16 17 18 19 20 21 22 23 24 25 26 27 28 29 30 35 36 39 40 41 45 46 47 48 49 50 51 52 53 54 55 56 57 58 59 60 61 62 63 64 65 66 67 68 69 70 71 72 73 74 75 76 77 78 79 80 81 82 83 84 85 86 87 88 89 90 91 92 93 94 95 96 97 98 99 100 101 102 103 104 105 106 107 108 109 110 111 112,
[240, size=32] 	 8.3043164E-4 	  1 2 3 4 5 6 7 19 25 26 27 28 29 30 35 36 39 40 41 45 46 47 48 49 50 51 52 53 54 55 56 57 58 59 60 61 62 63 64 65 66 67 68 69 70 71 72 75 76 77 78 79 80 81 82 83 84 85 86 91 92 93 94 95 96 97 98 99 100 101 102 103 104 105 107 108 109 110 111 112,
[241, size=33] 	 0.005252995 	  1 2 3 4 5 6 7 25 26 27 28 29 30 35 36 39 40 41 45 46 47 48 49 50 51 52 53 54 55 56 57 58 59 60 61 62 63 64 65 66 67 68 69 70 71 72 75 76 77 78 79 80 81 82 83 84 85 86 91 92 93 94 95 96 97 98 99 100 101 102 103 104 105 107 108 109 110 111 112,
[242, size=1] 	 0.049946617 	  1 2 3 4 5 6 7 8 9 10 11 12 13 14 15 16 17 18 19 20 21 22 23 24 25 26 27 28 29 30 32 33 34 35 36 37 38 39 40 41 42 43 44 45 46 47 48 49 50 51 52 53 54 55 56 57 58 59 60 61 62 63 64 65 66 67 68 69 70 71 72 73 74 75 76 77 78 79 80 81 82 83 84 85 86 87 88 89 90 91 92 93 94 95 96 97 98 99 100 101 102 103 104 105 106 107 108 109 110 111 112,
[243, size=2] 	 0.0021829726 	  1 2 3 4 5 6 7 8 9 10 11 12 13 14 15 16 17 18 19 20 21 22 23 24 25 26 27 28 29 30 33 34 35 36 37 38 39 40 41 42 43 44 45 46 47 48 49 50 51 52 53 54 55 56 57 58 59 60 61 62 63 64 65 66 67 68 69 70 71 72 73 74 75 76 77 78 79 80 81 82 83 84 85 86 87 88 89 90 91 92 93 94 95 96 97 98 99 100 101 102 103 104 105 106 107 108 109 110 111 112,
[244, size=1] 	 0.060859967 	  1 2 3 4 5 6 7 8 9 10 11 12 13 14 15 16 17 18 19 20 21 22 23 24 25 26 27 28 29 30 31 33 34 35 36 37 38 39 40 41 42 43 44 45 46 47 48 49 50 51 52 53 54 55 56 57 58 59 60 61 62 63 64 65 66 67 68 69 70 71 72 73 74 75 76 77 78 79 80 81 82 83 84 85 86 87 88 89 90 91 92 93 94 95 96 97 98 99 100 101 102 103 104 105 106 107 108 109 110 111 112,
[245, size=1] 	 0.019374864 	  1 2 3 4 5 6 7 8 9 10 11 12 13 14 15 16 17 18 19 20 21 22 23 24 25 26 27 28 29 30 31 32 33 34 35 36 37 38 39 40 41 42 44 45 46 47 48 49 50 51 52 53 54 55 56 57 58 59 60 61 62 63 64 65 66 67 68 69 70 71 72 73 74 75 76 77 78 79 80 81 82 83 84 85 86 87 88 89 90 91 92 93 94 95 96 97 98 99 100 101 102 103 104 105 106 107 108 109 110 111 112,
[246, size=2] 	 0.03210176 	  1 2 3 4 5 6 7 8 9 10 11 12 13 14 15 16 17 18 19 20 21 22 23 24 25 26 27 28 29 30 31 32 33 34 35 36 37 38 39 40 41 42 45 46 47 48 49 50 51 52 53 54 55 56 57 58 59 60 61 62 63 64 65 66 67 68 69 70 71 72 73 74 75 76 77 78 79 80 81 82 83 84 85 86 87 88 89 90 91 92 93 94 95 96 97 98 99 100 101 102 103 104 105 106 107 108 109 110 111 112,
[247, size=3] 	 0.0015096756 	  1 2 3 4 5 6 7 8 9 10 11 12 13 14 15 16 17 18 19 20 21 22 23 24 25 26 27 28 29 30 31 32 33 34 35 36 37 38 39 40 41 45 46 47 48 49 50 51 52 53 54 55 56 57 58 59 60 61 62 63 64 65 66 67 68 69 70 71 72 73 74 75 76 77 78 79 80 81 82 83 84 85 86 87 88 89 90 91 92 93 94 95 96 97 98 99 100 101 102 103 104 105 106 107 108 109 110 111 112,
[248, size=1] 	 0.011507362 	  1 2 3 4 5 6 7 8 9 10 11 12 13 14 15 16 17 18 19 20 21 22 23 24 25 26 27 28 29 30 31 32 33 34 35 36 37 38 39 40 41 42 43 45 46 47 48 49 50 51 52 53 54 55 56 57 58 59 60 61 62 63 64 65 66 67 68 69 70 71 72 73 74 75 76 77 78 79 80 81 82 83 84 85 86 87 88 89 90 91 92 93 94 95 96 97 98 99 100 101 102 103 104 105 106 107 108 109 110 111 112,
[249, size=2] 	 9.719474E-4 	  1 2 3 4 5 6 7 8 9 10 11 12 13 14 15 16 17 18 19 20 21 22 23 24 25 26 27 28 29 30 31 32 33 34 35 36 37 38 39 40 41 43 45 46 47 48 49 50 51 52 53 54 55 56 57 58 59 60 61 62 63 64 65 66 67 68 69 70 71 72 73 74 75 76 77 78 79 80 81 82 83 84 85 86 87 88 89 90 91 92 93 94 95 96 97 98 99 100 101 102 103 104 105 106 107 108 109 110 111 112,
[250, size=5] 	 0.0048192395 	  1 2 3 4 5 6 7 8 9 10 11 12 13 14 15 16 17 18 19 20 21 22 23 24 25 26 27 28 29 30 31 32 34 35 36 39 40 41 43 45 46 47 48 49 50 51 52 53 54 55 56 57 58 59 60 61 62 63 64 65 66 67 68 69 70 71 72 73 74 75 76 77 78 79 80 81 82 83 84 85 86 87 88 89 90 91 92 93 94 95 96 97 98 99 100 101 102 103 104 105 106 107 108 109 110 111 112,
[251, size=1] 	 0.037512638 	  1 2 3 4 5 6 7 8 9 10 11 12 13 14 15 16 17 18 19 20 21 22 23 24 25 26 27 28 29 30 31 32 33 34 35 36 37 38 39 40 41 43 44 45 46 47 48 49 50 51 52 53 54 55 56 57 58 59 60 61 62 63 64 65 66 67 68 69 70 71 72 73 74 75 76 77 78 79 80 81 82 83 84 85 86 87 88 89 90 91 92 93 94 95 96 97 98 99 100 101 102 103 104 105 106 107 108 109 110 111 112,
[252, size=2] 	 0.0032282695 	  1 2 3 4 5 6 7 8 9 10 11 12 13 14 15 16 17 18 19 20 21 22 23 24 25 26 27 28 29 30 31 32 34 35 36 37 38 39 40 41 43 44 45 46 47 48 49 50 51 52 53 54 55 56 57 58 59 60 61 62 63 64 65 66 67 68 69 70 71 72 73 74 75 76 77 78 79 80 81 82 83 84 85 86 87 88 89 90 91 92 93 94 95 96 97 98 99 100 101 102 103 104 105 106 107 108 109 110 111 112,
[253, size=3] 	 0.0012291019 	  1 2 3 4 5 6 7 8 9 10 11 12 13 14 15 16 17 18 19 20 21 22 23 24 25 26 27 28 29 30 31 32 34 35 36 37 39 40 41 43 44 45 46 47 48 49 50 51 52 53 54 55 56 57 58 59 60 61 62 63 64 65 66 67 68 69 70 71 72 73 74 75 76 77 78 79 80 81 82 83 84 85 86 87 88 89 90 91 92 93 94 95 96 97 98 99 100 101 102 103 104 105 106 107 108 109 110 111 112,
[254, size=1] 	 0.03235913 	  1 2 3 4 5 6 7 8 9 10 11 12 13 14 15 16 17 18 19 20 21 22 23 24 25 26 27 28 29 30 31 32 34 35 36 37 38 39 40 41 42 43 44 45 46 47 48 49 50 51 52 53 54 55 56 57 58 59 60 61 62 63 64 65 66 67 68 69 70 71 72 73 74 75 76 77 78 79 80 81 82 83 84 85 86 87 88 89 90 91 92 93 94 95 96 97 98 99 100 101 102 103 104 105 106 107 108 109 110 111 112,
[255, size=3] 	 0.0036485344 	  1 2 3 4 5 6 7 8 9 10 11 12 13 14 15 16 17 18 19 20 21 22 23 24 25 26 27 28 29 30 31 32 34 35 36 39 40 41 42 43 44 45 46 47 48 49 50 51 52 53 54 55 56 57 58 59 60 61 62 63 64 65 66 67 68 69 70 71 72 73 74 75 76 77 78 79 80 81 82 83 84 85 86 87 88 89 90 91 92 93 94 95 96 97 98 99 100 101 102 103 104 105 106 107 108 109 110 111 112,
[256, size=1] 	 0.052509952 	  1 2 3 4 5 6 7 8 9 10 11 12 13 14 15 16 17 18 19 20 21 22 23 24 25 26 27 28 29 30 31 32 33 34 35 36 37 39 40 41 42 43 44 45 46 47 48 49 50 51 52 53 54 55 56 57 58 59 60 61 62 63 64 65 66 67 68 69 70 71 72 73 74 75 76 77 78 79 80 81 82 83 84 85 86 87 88 89 90 91 92 93 94 95 96 97 98 99 100 101 102 103 104 105 106 107 108 109 110 111 112,
[257, size=2] 	 0.014748629 	  1 2 3 4 5 6 7 8 9 10 11 12 13 14 15 16 17 18 19 20 21 22 23 24 25 26 27 28 29 30 31 32 33 34 35 36 39 40 41 42 43 44 45 46 47 48 49 50 51 52 53 54 55 56 57 58 59 60 61 62 63 64 65 66 67 68 69 70 71 72 73 74 75 76 77 78 79 80 81 82 83 84 85 86 87 88 89 90 91 92 93 94 95 96 97 98 99 100 101 102 103 104 105 106 107 108 109 110 111 112,
[258, size=1] 	 0.039557368 	  1 2 3 4 5 6 7 8 9 10 11 12 13 14 15 16 17 18 19 20 21 22 23 24 25 26 27 28 29 30 31 32 33 34 35 36 38 39 40 41 42 43 44 45 46 47 48 49 50 51 52 53 54 55 56 57 58 59 60 61 62 63 64 65 66 67 68 69 70 71 72 73 74 75 76 77 78 79 80 81 82 83 84 85 86 87 88 89 90 91 92 93 94 95 96 97 98 99 100 101 102 103 104 105 106 107 108 109 110 111 112,
[259, size=2] 	 0.009617061 	  1 2 3 4 5 6 7 8 9 10 11 12 13 14 15 16 17 18 19 20 21 22 23 24 25 26 27 28 29 30 31 32 33 34 35 36 38 39 40 41 42 43 44 45 46 47 48 49 50 51 52 53 54 55 56 57 58 59 60 61 62 63 64 65 66 67 68 69 70 71 72 73 74 75 76 77 78 79 80 81 82 83 84 85 86 87 88 89 90 91 92 93 94 95 96 97 98 99 100 101 102 103 104 105 107 108 109 110 111 112,
[260, size=1] 	 0.1095146 	  1 2 3 4 5 6 7 8 9 10 11 12 13 14 15 16 17 18 19 20 21 22 23 24 25 26 27 28 29 30 31 32 33 34 35 36 37 38 39 40 41 42 43 44 45 46 47 48 49 50 51 52 53 54 55 56 57 58 59 60 61 62 63 64 65 66 67 68 69 70 71 72 73 74 75 76 77 78 79 80 81 82 83 84 85 86 87 88 89 90 91 92 93 94 95 96 97 98 99 100 101 102 103 104 105 107 108 109 110 111 112,
[261, size=2] 	 0.0021017215 	  1 2 3 4 5 6 7 8 9 10 11 12 13 14 15 16 17 18 19 20 21 22 23 24 25 26 27 28 29 30 31 32 33 34 35 36 37 38 39 40 41 42 43 44 45 46 47 48 49 50 51 52 53 54 55 56 57 58 59 60 61 62 63 64 65 66 67 68 69 70 71 72 73 74 75 76 77 78 79 80 81 82 83 84 85 86 88 89 90 91 92 93 94 95 96 97 98 99 100 101 102 103 104 105 107 108 109 110 111 112,
[262, size=3] 	 0.0026097253 	  1 2 3 4 5 6 7 8 9 10 11 12 13 14 15 16 17 18 19 20 21 22 23 24 25 26 27 28 29 30 31 32 33 34 35 36 37 38 39 40 41 42 43 44 45 46 47 48 49 50 51 52 53 54 55 56 57 58 59 60 61 62 63 64 65 66 67 68 69 70 71 72 73 74 75 76 77 78 79 80 81 82 83 84 85 86 89 90 91 92 93 94 95 96 97 98 99 100 101 102 103 104 105 107 108 109 110 111 112,
[263, size=5] 	 0.0097141415 	  1 2 3 4 5 6 7 8 9 10 11 12 13 14 15 16 17 18 19 20 21 22 23 24 25 26 27 28 29 30 31 32 33 34 35 36 37 38 39 40 41 42 43 44 45 46 47 48 49 50 51 52 53 54 55 56 57 58 59 60 61 62 63 64 65 66 67 68 69 70 71 72 73 74 75 76 77 78 79 80 81 82 83 84 85 86 91 92 93 94 95 96 97 98 99 100 101 102 103 104 105 107 108 109 110 111 112,
[264, size=1] 	 0.042143077 	  1 2 3 4 5 6 7 8 9 10 11 12 13 14 15 16 17 18 19 20 21 22 23 24 25 26 27 28 29 30 31 32 33 34 35 36 37 38 39 40 41 42 43 44 45 46 47 48 49 50 51 52 53 54 55 56 57 58 59 60 61 62 63 64 65 66 67 68 69 70 71 72 73 74 75 76 77 78 79 80 81 82 83 84 85 86 88 89 90 91 92 93 94 95 96 97 98 99 100 101 102 103 104 105 106 107 108 109 110 111 112,
[265, size=2] 	 0.0027310073 	  1 2 3 4 5 6 7 8 9 10 11 12 13 14 15 16 17 18 19 20 21 22 23 24 25 26 27 28 29 30 31 32 33 34 35 36 37 38 39 40 41 42 43 44 45 46 47 48 49 50 51 52 53 54 55 56 57 58 59 60 61 62 63 64 65 66 67 68 69 70 71 72 73 74 75 76 77 78 79 80 81 82 83 84 85 86 89 90 91 92 93 94 95 96 97 98 99 100 101 102 103 104 105 106 107 108 109 110 111 112,
[266, size=3] 	 0.01085572 	  1 2 3 4 5 6 7 8 9 10 11 12 13 14 15 16 17 18 19 20 21 22 23 24 25 26 27 28 29 30 31 32 33 34 35 36 37 38 39 40 41 42 43 44 45 46 47 48 49 50 51 52 53 54 55 56 57 58 59 60 61 62 63 64 65 66 67 68 69 70 71 72 73 74 75 76 77 78 79 80 81 82 83 84 85 86 89 91 92 93 94 95 96 97 98 99 100 101 102 103 104 105 106 107 108 109 110 111 112,
[267, size=6] 	 0.011188413 	  1 2 3 4 5 6 7 8 9 10 11 12 13 14 15 16 17 18 19 20 21 22 23 24 25 26 27 28 29 30 31 32 33 34 35 36 37 38 39 40 41 42 43 44 45 46 47 48 49 50 51 52 53 54 55 56 57 58 59 60 61 62 63 64 65 66 67 68 69 70 71 72 75 76 77 78 79 80 81 82 83 84 85 86 91 92 93 94 95 96 97 98 99 100 101 102 103 104 105 106 107 108 109 110 111 112,
[268, size=1] 	 0.02402412 	  1 2 3 4 5 6 7 8 9 10 11 12 13 14 15 16 17 18 19 20 21 22 23 24 25 26 27 28 29 30 31 32 33 34 35 36 37 38 39 40 41 42 43 44 45 46 47 48 49 50 51 52 53 54 55 56 57 58 59 60 61 62 63 64 65 66 67 68 69 70 71 72 73 74 75 76 77 78 79 80 81 82 83 84 85 86 87 89 90 91 92 93 94 95 96 97 98 99 100 101 102 103 104 105 106 107 108 109 110 111 112,
[269, size=3] 	 0.014697941 	  1 2 3 4 5 6 7 8 9 10 11 12 13 14 15 16 17 18 19 20 21 22 23 24 25 26 27 28 29 30 31 32 33 34 35 36 37 38 39 40 41 42 43 44 45 46 47 48 49 50 51 52 53 54 55 56 57 58 59 60 61 62 63 64 65 66 67 68 69 70 71 72 73 74 75 76 77 78 79 80 81 82 83 84 85 86 87 91 92 93 94 95 96 97 98 99 100 101 102 103 104 105 106 107 108 109 110 111 112,
[270, size=4] 	 0.0021211917 	  1 2 3 4 5 6 7 8 9 10 11 12 13 14 15 16 17 18 19 20 21 22 23 24 25 26 27 28 29 30 31 32 33 34 35 36 37 38 39 40 41 42 43 44 45 46 47 48 49 50 51 52 53 54 55 56 57 58 59 60 61 62 63 64 65 66 67 68 69 70 71 72 73 75 76 77 78 79 80 81 82 83 84 85 86 87 91 92 93 94 95 96 97 98 99 100 101 102 103 104 105 106 107 108 109 110 111 112,
[271, size=1] 	 0.03605249 	  1 2 3 4 5 6 7 8 9 10 11 12 13 14 15 16 17 18 19 20 21 22 23 24 25 26 27 28 29 30 31 32 33 34 35 36 37 38 39 40 41 42 43 44 45 46 47 48 49 50 51 52 53 54 55 56 57 58 59 60 61 62 63 64 65 66 67 68 69 70 71 72 73 74 75 76 77 78 79 80 81 82 83 84 85 86 87 88 89 91 92 93 94 95 96 97 98 99 100 101 102 103 104 105 106 107 108 109 110 111 112,
[272, size=2] 	 0.0104518365 	  1 2 3 4 5 6 7 8 9 10 11 12 13 14 15 16 17 18 19 20 21 22 23 24 25 26 27 28 29 30 31 32 33 34 35 36 37 38 39 40 41 42 43 44 45 46 47 48 49 50 51 52 53 54 55 56 57 58 59 60 61 62 63 64 65 66 67 68 69 70 71 72 73 74 75 76 77 78 79 80 81 82 83 84 85 86 87 88 91 92 93 94 95 96 97 98 99 100 101 102 103 104 105 106 107 108 109 110 111 112,
[273, size=25] 	 0.0018095527 	  1 2 3 4 5 6 7 25 26 27 28 29 30 31 32 33 34 35 36 37 38 39 40 41 42 43 44 46 47 49 50 51 52 53 54 55 56 57 58 59 60 61 62 63 64 65 66 67 68 69 70 71 72 75 76 77 78 79 80 81 82 83 84 85 86 87 88 91 92 93 94 95 96 97 98 99 100 101 102 103 106 107 108 109 110 111 112,
[274, size=1] 	 0.06727676 	  1 2 3 4 5 6 7 8 9 10 11 12 13 14 15 16 17 18 19 20 21 22 23 24 25 26 27 28 29 30 31 32 33 34 35 36 37 38 39 40 41 42 43 44 45 46 47 48 49 50 51 52 53 54 55 56 57 58 59 60 61 62 63 64 65 66 67 68 69 70 71 72 73 74 75 76 77 78 79 80 81 82 83 84 85 86 87 88 90 91 92 93 94 95 96 97 98 99 100 101 102 103 104 105 106 107 108 109 110 111 112,
[275, size=2] 	 0.0064602755 	  1 2 3 4 5 6 7 8 9 10 11 12 13 14 15 16 17 18 19 20 21 22 23 24 25 26 27 28 29 30 31 32 33 34 35 36 37 38 39 40 41 42 43 44 45 46 47 48 49 50 51 52 53 54 55 56 57 58 59 60 61 62 63 64 65 66 67 68 69 70 71 72 73 75 76 77 78 79 80 81 82 83 84 85 86 87 88 90 91 92 93 94 95 96 97 98 99 100 101 102 103 104 105 106 107 108 109 110 111 112,
[276, size=4] 	 0.00305653 	  1 2 3 4 5 6 7 8 9 10 11 13 14 15 16 17 18 19 20 21 22 23 24 25 26 27 28 29 30 31 32 33 34 35 36 37 38 39 40 41 42 43 44 45 46 47 48 49 50 51 52 53 54 55 56 57 58 59 60 61 62 63 64 65 66 67 68 69 70 71 72 75 76 77 78 79 80 81 82 83 84 85 86 87 88 90 91 92 93 94 95 96 97 98 99 100 101 102 103 104 105 106 107 108 109 110 111 112,
[277, size=1] 	 0.042288605 	  1 2 3 4 5 6 7 8 9 10 11 12 13 14 15 16 17 18 19 20 21 22 23 24 25 26 27 28 29 30 31 32 33 34 35 36 37 38 39 40 41 42 43 44 45 46 47 48 49 50 51 52 53 54 55 56 57 58 59 60 61 62 63 64 65 66 67 68 69 70 71 72 73 75 76 77 78 79 80 81 82 83 84 85 86 87 88 89 90 91 92 93 94 95 96 97 98 99 100 101 102 103 104 105 106 107 108 109 110 111 112,
[278, size=2] 	 0.019636702 	  1 2 3 4 5 6 7 8 9 10 11 12 13 14 15 16 17 18 19 20 21 22 23 24 25 26 27 28 29 30 31 32 33 34 35 36 37 38 39 40 41 42 43 44 45 46 47 48 49 50 51 52 53 54 55 56 57 58 59 60 61 62 63 64 65 66 67 68 69 70 71 72 75 76 77 78 79 80 81 82 83 84 85 86 87 88 89 90 91 92 93 94 95 96 97 98 99 100 101 102 103 104 105 106 107 108 109 110 111 112,
[279, size=21] 	 0.0036177756 	  1 2 3 4 5 6 7 25 26 27 28 29 30 31 32 33 34 35 36 37 38 39 40 41 42 43 44 45 46 47 48 49 50 51 52 53 54 55 56 57 58 59 60 61 62 63 64 65 66 67 68 69 70 71 72 75 76 77 78 79 80 81 82 83 84 85 86 87 88 89 90 91 92 93 94 95 96 97 98 99 100 101 102 103 106 107 108 109 110 111 112,
[280, size=22] 	 0.00682965 	  1 2 3 4 5 6 7 25 26 27 28 29 30 31 32 33 34 35 36 37 38 39 40 41 42 43 44 46 47 48 49 50 51 52 53 54 55 56 57 58 59 60 61 62 63 64 65 66 67 68 69 70 71 72 75 76 77 78 79 80 81 82 83 84 85 86 87 88 89 90 91 92 93 94 95 96 97 98 99 100 101 102 103 106 107 108 109 110 111 112,
[281, size=1] 	 0.036313333 	  1 2 3 4 5 6 7 8 9 10 11 12 13 14 15 16 17 18 19 20 21 22 23 24 25 26 27 28 29 30 31 32 33 34 35 36 37 38 39 40 41 42 43 44 45 46 47 48 49 50 51 52 53 54 55 56 57 58 59 60 61 62 63 64 65 66 67 68 69 70 71 72 74 75 76 77 78 79 80 81 82 83 84 85 86 87 88 89 90 91 92 93 94 95 96 97 98 99 100 101 102 103 104 105 106 107 108 109 110 111 112,
[282, size=22] 	 0.0063446793 	  1 2 3 4 5 6 7 25 26 27 28 29 30 31 32 33 34 35 36 37 38 39 40 41 42 43 44 46 47 49 50 51 52 53 54 55 56 57 58 59 60 61 62 63 64 65 66 67 68 69 70 71 72 74 75 76 77 78 79 80 81 82 83 84 85 86 87 88 89 90 91 92 93 94 95 96 97 98 99 100 101 102 103 106 107 108 109 110 111 112,
[283, size=1] 	 0.080335215 	  1 2 3 4 5 6 7 8 9 10 11 13 14 15 16 17 18 19 20 21 22 23 24 25 26 27 28 29 30 31 32 33 34 35 36 37 38 39 40 41 42 43 44 45 46 47 48 49 50 51 52 53 54 55 56 57 58 59 60 61 62 63 64 65 66 67 68 69 70 71 72 73 74 75 76 77 78 79 80 81 82 83 84 85 86 87 88 89 90 91 92 93 94 95 96 97 98 99 100 101 102 103 104 105 106 107 108 109 110 111 112,
[284, size=2] 	 0.013778744 	  1 2 3 4 5 6 7 8 9 10 11 14 15 16 17 18 19 20 21 22 23 24 25 26 27 28 29 30 31 32 33 34 35 36 37 38 39 40 41 42 43 44 45 46 47 48 49 50 51 52 53 54 55 56 57 58 59 60 61 62 63 64 65 66 67 68 69 70 71 72 73 74 75 76 77 78 79 80 81 82 83 84 85 86 87 88 89 90 91 92 93 94 95 96 97 98 99 100 101 102 103 104 105 106 107 108 109 110 111 112,
[285, size=5] 	 0.0022117638 	  1 2 3 4 5 6 7 10 11 14 16 17 18 19 20 21 22 23 24 25 26 27 28 29 30 31 32 33 34 35 36 37 38 39 40 41 42 43 44 45 46 47 48 49 50 51 52 53 54 55 56 57 58 59 60 61 62 63 64 65 66 67 68 69 70 71 72 73 74 75 76 77 78 79 80 81 82 83 84 85 86 87 88 89 90 91 92 93 94 95 96 97 98 99 100 101 102 103 104 105 106 107 108 109 110 111 112,
[286, size=8] 	 0.0031833863 	  1 2 3 4 5 6 7 10 16 17 18 19 20 21 23 24 25 26 27 28 29 30 31 32 33 34 35 36 37 38 39 40 41 42 43 44 45 46 47 48 49 50 51 52 53 54 55 56 57 58 59 60 61 62 63 64 65 66 67 68 69 70 71 72 73 74 75 76 77 78 79 80 81 82 83 84 85 86 87 88 89 90 91 92 93 94 95 96 97 98 99 100 101 102 103 104 105 106 107 108 109 110 111 112,
[287, size=15] 	 0.0022632233 	  1 2 3 4 5 6 7 17 19 25 26 27 28 29 30 31 32 33 34 35 36 37 38 39 40 41 42 43 44 45 46 47 48 49 50 51 52 53 54 55 56 57 58 59 60 61 62 63 64 65 66 67 68 69 70 71 72 73 74 75 76 77 78 79 80 81 82 83 84 85 86 87 88 89 90 91 92 93 94 95 96 97 98 99 100 101 102 103 104 105 106 107 108 109 110 111 112,
[288, size=16] 	 0.006854674 	  1 2 3 4 5 6 7 19 25 26 27 28 29 30 31 32 33 34 35 36 37 38 39 40 41 42 43 44 45 46 47 48 49 50 51 52 53 54 55 56 57 58 59 60 61 62 63 64 65 66 67 68 69 70 71 72 73 74 75 76 77 78 79 80 81 82 83 84 85 86 87 88 89 90 91 92 93 94 95 96 97 98 99 100 101 102 103 104 105 106 107 108 109 110 111 112,
[289, size=17] 	 0.018964598 	  1 2 3 4 5 6 7 25 26 27 28 29 30 31 32 33 34 35 36 37 38 39 40 41 42 43 44 45 46 47 48 49 50 51 52 53 54 55 56 57 58 59 60 61 62 63 64 65 66 67 68 69 70 71 72 73 74 75 76 77 78 79 80 81 82 83 84 85 86 87 88 89 90 91 92 93 94 95 96 97 98 99 100 101 102 103 104 105 106 107 108 109 110 111 112,
[290, size=18] 	 0.0029268183 	  1 2 3 4 5 6 7 25 26 27 28 29 30 31 32 33 34 35 36 37 38 39 40 41 42 43 44 45 46 47 48 49 50 51 52 53 54 55 56 57 58 59 60 61 62 63 64 65 66 67 68 69 70 71 72 73 74 75 76 77 78 79 80 81 82 83 84 85 86 87 88 89 90 91 92 93 94 95 96 97 98 99 100 101 102 103 105 106 107 108 109 110 111 112,
[291, size=21] 	 0.004528293 	  1 2 3 4 5 6 7 25 26 27 28 29 30 31 32 33 34 35 36 37 38 39 40 41 42 43 44 46 47 49 50 51 52 53 54 55 56 57 58 59 60 61 62 63 64 65 66 67 68 69 70 71 72 73 74 75 76 77 78 79 80 81 82 83 84 85 86 87 88 89 90 91 92 93 94 95 96 97 98 99 100 101 102 103 106 107 108 109 110 111 112,
[292, size=32] 	 7.151591E-4 	  1 2 3 4 5 6 7 26 27 28 29 30 31 32 33 34 35 36 37 38 39 40 41 42 43 44 46 47 49 50 51 52 53 54 55 56 57 58 59 60 61 62 63 64 65 66 67 68 69 70 71 72 73 74 75 76 77 84 85 86 87 88 89 90 91 92 94 95 96 97 98 99 100 101 102 103 106 109 110 112,
[293, size=1] 	 0.03730948 	  1 2 3 4 5 6 7 8 9 10 11 12 14 15 16 17 18 19 20 21 22 23 24 25 26 27 28 29 30 31 32 33 34 35 36 37 38 39 40 41 42 43 44 45 46 47 48 49 50 51 52 53 54 55 56 57 58 59 60 61 62 63 64 65 66 67 68 69 70 71 72 73 74 75 76 77 78 79 80 81 82 83 84 85 86 87 88 89 90 91 92 93 94 95 96 97 98 99 100 101 102 103 104 105 106 107 108 109 110 111 112,
[294, size=16] 	 8.250916E-5 	  1 2 3 4 5 6 7 12 25 26 27 28 29 30 31 32 33 34 35 36 37 38 39 40 41 42 43 44 45 46 47 48 49 50 51 52 53 54 55 56 57 58 59 60 61 62 63 64 65 66 67 68 69 70 71 72 73 74 75 76 77 78 79 80 81 82 83 84 85 86 87 88 89 90 91 92 93 94 95 96 97 98 99 100 101 102 103 104 105 106 107 108 109 110 111 112,
[295, size=20] 	 0.0013533813 	  1 2 3 4 5 6 7 12 25 26 27 28 29 30 31 32 33 34 35 36 37 38 39 40 41 42 43 44 46 47 49 50 51 52 53 54 55 56 57 58 59 60 61 62 63 64 65 66 67 68 69 70 71 72 73 74 75 76 77 78 79 80 81 82 83 84 85 86 87 88 89 90 91 92 93 94 95 96 97 98 99 100 101 102 103 106 107 108 109 110 111 112,
[296, size=1] 	 0.082314886 	  1 2 3 4 5 6 7 9 10 11 12 13 14 15 16 17 18 19 20 21 22 23 24 25 26 27 28 29 30 31 32 33 34 35 36 37 38 39 40 41 42 43 44 45 46 47 48 49 50 51 52 53 54 55 56 57 58 59 60 61 62 63 64 65 66 67 68 69 70 71 72 73 74 75 76 77 78 79 80 81 82 83 84 85 86 87 88 89 90 91 92 93 94 95 96 97 98 99 100 101 102 103 104 105 106 107 108 109 110 111 112,
[297, size=2] 	 0.0018584935 	  1 2 3 4 5 6 7 10 11 12 13 14 15 16 17 18 19 20 21 22 23 24 25 26 27 28 29 30 31 32 33 34 35 36 37 38 39 40 41 42 43 44 45 46 47 48 49 50 51 52 53 54 55 56 57 58 59 60 61 62 63 64 65 66 67 68 69 70 71 72 73 74 75 76 77 78 79 80 81 82 83 84 85 86 87 88 89 90 91 92 93 94 95 96 97 98 99 100 101 102 103 104 105 106 107 108 109 110 111 112,
[298, size=4] 	 0.007536643 	  1 2 3 4 5 6 7 10 11 12 13 16 17 18 19 20 21 22 23 24 25 26 27 28 29 30 31 32 33 34 35 36 37 38 39 40 41 42 43 44 45 46 47 48 49 50 51 52 53 54 55 56 57 58 59 60 61 62 63 64 65 66 67 68 69 70 71 72 73 74 75 76 77 78 79 80 81 82 83 84 85 86 87 88 89 90 91 92 93 94 95 96 97 98 99 100 101 102 103 104 105 106 107 108 109 110 111 112,
[299, size=1] 	 0.03865113 	  1 2 3 4 5 6 7 8 10 11 12 13 14 15 16 17 18 19 20 21 22 23 24 25 26 27 28 29 30 31 32 33 34 35 36 37 38 39 40 41 42 43 44 45 46 47 48 49 50 51 52 53 54 55 56 57 58 59 60 61 62 63 64 65 66 67 68 69 70 71 72 73 74 75 76 77 78 79 80 81 82 83 84 85 86 87 88 89 90 91 92 93 94 95 96 97 98 99 100 101 102 103 104 105 106 107 108 109 110 111 112,
[300, size=2] 	 0.010479759 	  1 2 3 4 5 6 7 8 10 11 12 13 14 16 17 18 19 20 21 22 23 24 25 26 27 28 29 30 31 32 33 34 35 36 37 38 39 40 41 42 43 44 45 46 47 48 49 50 51 52 53 54 55 56 57 58 59 60 61 62 63 64 65 66 67 68 69 70 71 72 73 74 75 76 77 78 79 80 81 82 83 84 85 86 87 88 89 90 91 92 93 94 95 96 97 98 99 100 101 102 103 104 105 106 107 108 109 110 111 112,
[301, size=4] 	 0.0023421217 	  1 2 3 4 5 6 7 8 10 11 12 13 16 17 18 19 20 21 23 24 25 26 27 28 29 30 31 32 33 34 35 36 37 38 39 40 41 42 43 44 45 46 47 48 49 50 51 52 53 54 55 56 57 58 59 60 61 62 63 64 65 66 67 68 69 70 71 72 73 74 75 76 77 78 79 80 81 82 83 84 85 86 87 88 89 90 91 92 93 94 95 96 97 98 99 100 101 102 103 104 105 106 107 108 109 110 111 112,
[302, size=10] 	 6.04702E-4 	  1 2 3 4 5 6 7 8 12 13 17 19 21 24 25 26 27 28 29 30 31 32 33 34 35 36 37 38 39 40 41 42 43 44 45 46 47 48 49 50 51 52 53 54 55 56 57 58 59 60 61 62 63 64 65 66 67 68 69 70 71 72 73 74 75 76 77 78 79 80 81 82 83 84 85 86 87 88 89 90 91 92 93 94 95 96 97 98 99 100 101 102 103 104 105 106 107 108 109 110 111 112,
[303, size=13] 	 0.0070375367 	  1 2 3 4 5 6 7 8 12 13 19 25 26 27 28 29 30 31 32 33 34 35 36 37 38 39 40 41 42 43 44 45 46 47 48 49 50 51 52 53 54 55 56 57 58 59 60 61 62 63 64 65 66 67 68 69 70 71 72 73 74 75 76 77 78 79 80 81 82 83 84 85 86 87 88 89 90 91 92 93 94 95 96 97 98 99 100 101 102 103 104 105 106 107 108 109 110 111 112,
[304, size=18] 	 0.0028231067 	  1 2 3 4 5 6 7 8 12 13 25 26 27 28 29 30 31 32 33 34 35 36 37 38 39 40 41 42 43 44 46 47 49 50 51 52 53 54 55 56 57 58 59 60 61 62 63 64 65 66 67 68 69 70 71 72 73 74 75 76 77 78 79 80 81 82 83 84 85 86 87 88 89 90 91 92 93 94 95 96 97 98 99 100 101 102 103 106 107 108 109 110 111 112,
[305, size=1] 	 0.025370464 	  1 2 3 4 5 6 7 8 9 10 11 12 13 14 16 17 18 19 20 21 22 23 24 25 26 27 28 29 30 31 32 33 34 35 36 37 38 39 40 41 42 43 44 45 46 47 48 49 50 51 52 53 54 55 56 57 58 59 60 61 62 63 64 65 66 67 68 69 70 71 72 73 74 75 76 77 78 79 80 81 82 83 84 85 86 87 88 89 90 91 92 93 94 95 96 97 98 99 100 101 102 103 104 105 106 107 108 109 110 111 112,
[306, size=3] 	 0.008920237 	  1 2 3 4 5 6 7 8 9 10 11 12 13 16 17 18 19 20 21 23 24 25 26 27 28 29 30 31 32 33 34 35 36 37 38 39 40 41 42 43 44 45 46 47 48 49 50 51 52 53 54 55 56 57 58 59 60 61 62 63 64 65 66 67 68 69 70 71 72 73 74 75 76 77 78 79 80 81 82 83 84 85 86 87 88 89 90 91 92 93 94 95 96 97 98 99 100 101 102 103 104 105 106 107 108 109 110 111 112,
[307, size=5] 	 0.0070082317 	  1 2 3 4 5 6 7 8 9 10 12 13 17 18 19 20 21 23 24 25 26 27 28 29 30 31 32 33 34 35 36 37 38 39 40 41 42 43 44 45 46 47 48 49 50 51 52 53 54 55 56 57 58 59 60 61 62 63 64 65 66 67 68 69 70 71 72 73 74 75 76 77 78 79 80 81 82 83 84 85 86 87 88 89 90 91 92 93 94 95 96 97 98 99 100 101 102 103 104 105 106 107 108 109 110 111 112,
[308, size=1] 	 0.050063193 	  1 2 3 4 5 6 7 8 9 10 11 12 13 15 16 17 18 19 20 21 22 23 24 25 26 27 28 29 30 31 32 33 34 35 36 37 38 39 40 41 42 43 44 45 46 47 48 49 50 51 52 53 54 55 56 57 58 59 60 61 62 63 64 65 66 67 68 69 70 71 72 73 74 75 76 77 78 79 80 81 82 83 84 85 86 87 88 89 90 91 92 93 94 95 96 97 98 99 100 101 102 103 104 105 106 107 108 109 110 111 112,
[309, size=2] 	 0.010301661 	  1 2 3 4 5 6 7 8 9 10 11 12 13 15 16 17 18 19 20 21 23 24 25 26 27 28 29 30 31 32 33 34 35 36 37 38 39 40 41 42 43 44 45 46 47 48 49 50 51 52 53 54 55 56 57 58 59 60 61 62 63 64 65 66 67 68 69 70 71 72 73 74 75 76 77 78 79 80 81 82 83 84 85 86 87 88 89 90 91 92 93 94 95 96 97 98 99 100 101 102 103 104 105 106 107 108 109 110 111 112,
[310, size=3] 	 8.912437E-4 	  1 2 3 4 5 6 7 8 9 10 12 13 15 16 17 18 19 20 21 23 24 25 26 27 28 29 30 31 32 33 34 35 36 37 38 39 40 41 42 43 44 45 46 47 48 49 50 51 52 53 54 55 56 57 58 59 60 61 62 63 64 65 66 67 68 69 70 71 72 73 74 75 76 77 78 79 80 81 82 83 84 85 86 87 88 89 90 91 92 93 94 95 96 97 98 99 100 101 102 103 104 105 106 107 108 109 110 111 112,
[311, size=4] 	 0.015462305 	  1 2 3 4 5 6 7 8 9 10 12 13 15 17 18 19 20 21 23 24 25 26 27 28 29 30 31 32 33 34 35 36 37 38 39 40 41 42 43 44 45 46 47 48 49 50 51 52 53 54 55 56 57 58 59 60 61 62 63 64 65 66 67 68 69 70 71 72 73 74 75 76 77 78 79 80 81 82 83 84 85 86 87 88 89 90 91 92 93 94 95 96 97 98 99 100 101 102 103 104 105 106 107 108 109 110 111 112,
[312, size=1] 	 0.034223728 	  1 2 3 4 5 6 7 8 9 10 11 12 13 14 15 16 17 18 19 20 21 23 24 25 26 27 28 29 30 31 32 33 34 35 36 37 38 39 40 41 42 43 44 45 46 47 48 49 50 51 52 53 54 55 56 57 58 59 60 61 62 63 64 65 66 67 68 69 70 71 72 73 74 75 76 77 78 79 80 81 82 83 84 85 86 87 88 89 90 91 92 93 94 95 96 97 98 99 100 101 102 103 104 105 106 107 108 109 110 111 112,
[313, size=15] 	 2.648159E-4 	  1 2 3 4 5 6 7 8 9 12 13 14 15 25 26 27 28 29 30 31 32 33 34 35 36 37 38 39 40 41 42 43 44 46 47 49 50 51 52 53 54 55 56 57 58 59 60 61 62 63 64 65 66 67 68 69 70 71 72 73 74 75 76 77 78 79 80 81 82 83 84 85 86 87 88 89 90 91 92 93 94 95 96 97 98 99 100 101 102 103 106 107 108 109 110 111 112,
[314, size=1] 	 0.068741344 	  1 2 3 4 5 6 7 8 9 10 12 13 14 15 16 17 18 19 20 21 22 23 24 25 26 27 28 29 30 31 32 33 34 35 36 37 38 39 40 41 42 43 44 45 46 47 48 49 50 51 52 53 54 55 56 57 58 59 60 61 62 63 64 65 66 67 68 69 70 71 72 73 74 75 76 77 78 79 80 81 82 83 84 85 86 87 88 89 90 91 92 93 94 95 96 97 98 99 100 101 102 103 104 105 106 107 108 109 110 111 112,
[315, size=11] 	 2.7438565E-4 	  1 2 3 4 5 6 7 8 9 12 13 14 15 22 25 26 27 28 29 30 31 32 33 34 35 36 37 38 39 40 41 42 43 44 45 46 47 48 49 50 51 52 53 54 55 56 57 58 59 60 61 62 63 64 65 66 67 68 69 70 71 72 73 74 75 76 77 78 79 80 81 82 83 84 85 86 87 88 89 90 91 92 93 94 95 96 97 98 99 100 101 102 103 105 106 107 108 109 110 111 112,
[316, size=1] 	 0.032752104 	  1 2 3 4 5 6 7 8 9 10 11 12 13 14 15 17 18 19 20 21 22 23 24 25 26 27 28 29 30 31 32 33 34 35 36 37 38 39 40 41 42 43 44 45 46 47 48 49 50 51 52 53 54 55 56 57 58 59 60 61 62 63 64 65 66 67 68 69 70 71 72 73 74 75 76 77 78 79 80 81 82 83 84 85 86 87 88 89 90 91 92 93 94 95 96 97 98 99 100 101 102 103 104 105 106 107 108 109 110 111 112,
[317, size=13] 	 0.0020873938 	  1 2 3 4 5 6 7 8 9 11 12 13 14 15 22 25 26 27 28 29 30 31 32 33 34 35 36 37 38 39 40 41 42 43 44 46 47 49 50 51 52 53 54 55 56 57 58 59 60 61 62 63 64 65 66 67 68 69 70 71 72 73 74 75 76 77 78 79 80 81 82 83 84 85 86 87 88 89 90 91 92 93 94 95 96 97 98 99 100 101 102 103 106 107 108 109 110 111 112,
[318, size=1] 	 0.044911824 	  1 2 3 4 5 6 7 8 9 10 11 12 13 14 15 16 17 18 19 21 22 23 24 25 26 27 28 29 30 31 32 33 34 35 36 37 38 39 40 41 42 43 44 45 46 47 48 49 50 51 52 53 54 55 56 57 58 59 60 61 62 63 64 65 66 67 68 69 70 71 72 73 74 75 76 77 78 79 80 81 82 83 84 85 86 87 88 89 90 91 92 93 94 95 96 97 98 99 100 101 102 103 104 105 106 107 108 109 110 111 112,
[319, size=1] 	 0.0459034 	  1 2 3 4 5 6 7 8 9 10 11 12 13 14 15 16 17 19 20 21 22 23 24 25 26 27 28 29 30 31 32 33 34 35 36 37 38 39 40 41 42 43 44 45 46 47 48 49 50 51 52 53 54 55 56 57 58 59 60 61 62 63 64 65 66 67 68 69 70 71 72 73 74 75 76 77 78 79 80 81 82 83 84 85 86 87 88 89 90 91 92 93 94 95 96 97 98 99 100 101 102 103 104 105 106 107 108 109 110 111 112,
[320, size=2] 	 0.011354547 	  1 2 3 4 5 6 7 8 9 11 12 13 14 15 16 17 19 20 21 22 23 24 25 26 27 28 29 30 31 32 33 34 35 36 37 38 39 40 41 42 43 44 45 46 47 48 49 50 51 52 53 54 55 56 57 58 59 60 61 62 63 64 65 66 67 68 69 70 71 72 73 74 75 76 77 78 79 80 81 82 83 84 85 86 87 88 89 90 91 92 93 94 95 96 97 98 99 100 101 102 103 104 105 106 107 108 109 110 111 112,
[321, size=3] 	 0.001973928 	  1 2 3 4 5 6 7 8 9 11 12 13 14 15 16 17 19 20 21 22 24 25 26 27 28 29 30 31 32 33 34 35 36 37 38 39 40 41 42 43 44 45 46 47 48 49 50 51 52 53 54 55 56 57 58 59 60 61 62 63 64 65 66 67 68 69 70 71 72 73 74 75 76 77 78 79 80 81 82 83 84 85 86 87 88 89 90 91 92 93 94 95 96 97 98 99 100 101 102 103 104 105 106 107 108 109 110 111 112,
[322, size=11] 	 9.6241327E-4 	  1 2 3 4 5 6 7 8 9 11 12 13 14 15 16 20 22 25 26 27 28 29 30 31 32 33 34 35 36 37 38 39 40 41 42 43 44 46 47 49 50 51 52 53 54 55 56 57 58 59 60 61 62 63 64 65 66 67 68 69 70 71 72 73 74 75 76 77 78 79 80 81 82 83 84 85 86 87 88 89 90 91 92 93 94 95 96 97 98 99 100 101 102 103 106 107 108 109 110 111 112,
[323, size=1] 	 0.011027921 	  1 2 3 4 5 6 7 8 9 11 12 13 14 15 16 17 18 19 20 21 22 23 24 25 26 27 28 29 30 31 32 33 34 35 36 37 38 39 40 41 42 43 44 45 46 47 48 49 50 51 52 53 54 55 56 57 58 59 60 61 62 63 64 65 66 67 68 69 70 71 72 73 74 75 76 77 78 79 80 81 82 83 84 85 86 87 88 89 90 91 92 93 94 95 96 97 98 99 100 101 102 103 104 105 106 107 108 109 110 111 112,
[324, size=2] 	 0.010058243 	  1 2 3 4 5 6 7 8 9 11 12 13 14 15 16 17 18 19 20 21 22 24 25 26 27 28 29 30 31 32 33 34 35 36 37 38 39 40 41 42 43 44 45 46 47 48 49 50 51 52 53 54 55 56 57 58 59 60 61 62 63 64 65 66 67 68 69 70 71 72 73 74 75 76 77 78 79 80 81 82 83 84 85 86 87 88 89 90 91 92 93 94 95 96 97 98 99 100 101 102 103 104 105 106 107 108 109 110 111 112,
[325, size=7] 	 0.003323954 	  1 2 3 4 5 6 7 8 9 11 12 13 14 15 16 18 20 22 25 26 27 28 29 30 31 32 33 34 35 36 37 38 39 40 41 42 43 44 45 46 47 48 49 50 51 52 53 54 55 56 57 58 59 60 61 62 63 64 65 66 67 68 69 70 71 72 73 74 75 76 77 78 79 80 81 82 83 84 85 86 87 88 89 90 91 92 93 94 95 96 97 98 99 100 101 102 103 105 106 107 108 109 110 111 112,
[326, size=1] 	 0.02321 	  1 2 3 4 5 6 7 8 9 10 11 12 13 14 15 16 17 18 19 20 21 22 24 25 26 27 28 29 30 31 32 33 34 35 36 37 38 39 40 41 42 43 44 45 46 47 48 49 50 51 52 53 54 55 56 57 58 59 60 61 62 63 64 65 66 67 68 69 70 71 72 73 74 75 76 77 78 79 80 81 82 83 84 85 86 87 88 89 90 91 92 93 94 95 96 97 98 99 100 101 102 103 104 105 106 107 108 109 110 111 112,
[327, size=2] 	 2.5881549E-5 	  1 2 3 4 5 6 7 8 9 10 11 12 13 14 15 16 17 18 19 20 22 24 25 26 27 28 29 30 31 32 33 34 35 36 37 38 39 40 41 42 43 44 45 46 47 48 49 50 51 52 53 54 55 56 57 58 59 60 61 62 63 64 65 66 67 68 69 70 71 72 73 74 75 76 77 78 79 80 81 82 83 84 85 86 87 88 89 90 91 92 93 94 95 96 97 98 99 100 101 102 103 104 105 106 107 108 109 110 111 112,
[328, size=1] 	 0.022181045 	  1 2 3 4 5 6 7 8 9 10 11 12 13 14 15 16 17 18 19 20 22 23 24 25 26 27 28 29 30 31 32 33 34 35 36 37 38 39 40 41 42 43 44 45 46 47 48 49 50 51 52 53 54 55 56 57 58 59 60 61 62 63 64 65 66 67 68 69 70 71 72 73 74 75 76 77 78 79 80 81 82 83 84 85 86 87 88 89 90 91 92 93 94 95 96 97 98 99 100 101 102 103 104 105 106 107 108 109 110 111 112,
[329, size=3] 	 0.0024790245 	  1 2 3 4 5 6 7 8 9 10 11 12 13 14 15 16 18 19 20 22 23 25 26 27 28 29 30 31 32 33 34 35 36 37 38 39 40 41 42 43 44 45 46 47 48 49 50 51 52 53 54 55 56 57 58 59 60 61 62 63 64 65 66 67 68 69 70 71 72 73 74 75 76 77 78 79 80 81 82 83 84 85 86 87 88 89 90 91 92 93 94 95 96 97 98 99 100 101 102 103 104 105 106 107 108 109 110 111 112,
[330, size=8] 	 5.899862E-4 	  1 2 3 4 5 6 7 8 9 10 11 12 13 14 15 16 18 20 22 23 25 26 27 28 29 30 31 32 33 34 35 36 37 38 39 40 41 42 43 44 46 47 49 50 51 52 53 54 55 56 57 58 59 60 61 62 63 64 65 66 67 68 69 70 71 72 73 74 75 76 77 78 79 80 81 82 83 84 85 86 87 88 89 90 91 92 93 94 95 96 97 98 99 100 101 102 103 106 107 108 109 110 111 112,
[331, size=1] 	 0.037318025 	  1 2 3 4 5 6 7 8 9 10 11 12 13 14 15 16 17 18 19 20 21 22 23 25 26 27 28 29 30 31 32 33 34 35 36 37 38 39 40 41 42 43 44 45 46 47 48 49 50 51 52 53 54 55 56 57 58 59 60 61 62 63 64 65 66 67 68 69 70 71 72 73 74 75 76 77 78 79 80 81 82 83 84 85 86 87 88 89 90 91 92 93 94 95 96 97 98 99 100 101 102 103 104 105 106 107 108 109 110 111 112,
[332, size=5] 	 0.0013432606 	  1 2 3 4 5 6 7 8 9 10 11 12 13 14 15 16 18 20 21 22 23 25 26 27 28 29 30 31 32 33 34 35 36 37 38 39 40 41 42 43 44 45 46 47 48 49 50 51 52 53 54 55 56 57 58 59 60 61 62 63 64 65 66 67 68 69 70 71 72 73 74 75 76 77 78 79 80 81 82 83 84 85 86 87 88 89 90 91 92 93 94 95 96 97 98 99 100 101 102 103 106 107 108 109 110 111 112,
[333, size=1] 	 0.042619754 	  1 2 3 4 5 6 7 8 9 10 11 12 13 14 15 16 18 19 20 21 22 23 24 25 26 27 28 29 30 31 32 33 34 35 36 37 38 39 40 41 42 43 44 45 46 47 48 49 50 51 52 53 54 55 56 57 58 59 60 61 62 63 64 65 66 67 68 69 70 71 72 73 74 75 76 77 78 79 80 81 82 83 84 85 86 87 88 89 90 91 92 93 94 95 96 97 98 99 100 101 102 103 104 105 106 107 108 109 110 111 112,
[334, size=1] 	 0.04409091 	  1 2 3 4 5 6 7 8 9 10 11 12 13 14 15 16 17 18 20 21 22 23 24 25 26 27 28 29 30 31 32 33 34 35 36 37 38 39 40 41 42 43 44 45 46 47 48 49 50 51 52 53 54 55 56 57 58 59 60 61 62 63 64 65 66 67 68 69 70 71 72 73 74 75 76 77 78 79 80 81 82 83 84 85 86 87 88 89 90 91 92 93 94 95 96 97 98 99 100 101 102 103 104 105 106 107 108 109 110 111 112,
[335, size=2] 	 0.002618822 	  1 2 3 4 5 6 7 8 9 10 11 12 13 14 15 16 17 18 20 21 22 23 24 25 26 27 28 29 30 31 32 33 34 35 36 37 38 39 40 41 42 43 44 45 46 47 48 49 50 51 52 53 54 55 56 57 58 59 60 61 62 63 64 65 66 67 68 69 70 71 72 73 74 75 76 77 78 79 80 81 82 83 84 85 86 87 88 89 90 91 92 93 94 95 96 97 98 99 100 101 102 103 105 106 107 108 109 110 111 112,
[336, size=1] 	 0.021561503 	  1 2 3 4 5 6 7 8 9 10 11 12 13 14 15 16 17 18 19 20 21 22 23 24 25 26 27 28 29 30 31 32 33 34 35 36 37 38 39 40 41 42 43 44 45 46 47 48 49 50 51 52 53 54 55 56 57 58 59 60 61 62 63 64 65 66 67 68 69 70 71 72 73 74 75 76 77 78 79 80 81 82 83 84 85 86 87 88 89 90 91 92 93 94 95 96 97 98 99 100 101 102 103 105 106 107 108 109 110 111 112,
[337, size=2] 	 0.03527938 	  1 2 3 4 5 6 7 8 9 10 11 12 13 14 15 16 17 18 19 20 21 22 23 24 25 26 27 28 29 30 31 32 33 34 35 36 37 38 39 40 41 42 43 44 45 46 47 48 49 50 51 52 53 54 55 56 57 58 59 60 61 62 63 64 65 66 67 68 69 70 71 72 73 74 75 76 77 78 79 80 81 82 83 84 85 86 87 88 89 90 91 92 93 94 95 96 97 98 99 100 101 102 103 106 107 108 109 110 111 112,
[338, size=3] 	 0.0024630057 	  1 2 3 4 5 6 7 8 9 10 11 12 13 14 15 16 17 18 19 20 21 22 23 24 25 26 27 28 29 30 31 32 33 34 35 36 37 38 39 40 41 42 43 44 46 47 48 49 50 51 52 53 54 55 56 57 58 59 60 61 62 63 64 65 66 67 68 69 70 71 72 73 74 75 76 77 78 79 80 81 82 83 84 85 86 87 88 89 90 91 92 93 94 95 96 97 98 99 100 101 102 103 106 107 108 109 110 111 112,
[339, size=4] 	 0.0015488827 	  1 2 3 4 5 6 7 8 9 10 11 12 13 14 15 16 17 18 19 20 21 22 23 24 25 26 27 28 29 30 31 32 33 34 35 36 37 38 39 40 41 42 43 44 46 47 49 50 51 52 53 54 55 56 57 58 59 60 61 62 63 64 65 66 67 68 69 70 71 72 73 74 75 76 77 78 79 80 81 82 83 84 85 86 87 88 89 90 91 92 93 94 95 96 97 98 99 100 101 102 103 106 107 108 109 110 111 112,
[340, size=1] 	 0.059234906 	  1 2 3 4 5 6 7 8 9 10 11 12 13 14 15 16 17 18 19 20 21 22 23 24 25 26 27 28 29 30 31 32 33 34 35 36 37 38 39 40 41 42 43 44 45 46 47 48 49 50 51 52 53 54 55 56 57 58 59 60 61 62 63 64 65 66 67 68 69 70 71 72 73 74 75 76 77 78 79 80 81 82 83 84 85 86 87 88 89 90 91 92 93 94 95 96 97 98 99 100 101 102 103 104 106 107 108 109 110 111 112,
[341, size=1] 	 0.07495642 	  1 2 3 4 5 6 7 8 9 10 11 12 13 14 15 16 17 18 19 20 21 22 23 24 25 26 27 28 29 30 31 32 33 34 35 36 37 38 39 40 41 42 43 44 46 47 48 49 50 51 52 53 54 55 56 57 58 59 60 61 62 63 64 65 66 67 68 69 70 71 72 73 74 75 76 77 78 79 80 81 82 83 84 85 86 87 88 89 90 91 92 93 94 95 96 97 98 99 100 101 102 103 104 105 106 107 108 109 110 111 112,
[342, size=2] 	 0.0045164507 	  1 2 3 4 5 6 7 8 9 10 11 12 13 14 15 16 17 18 19 20 21 22 23 24 25 26 27 28 29 30 31 32 33 34 35 36 37 38 39 40 41 42 43 44 46 47 49 50 51 52 53 54 55 56 57 58 59 60 61 62 63 64 65 66 67 68 69 70 71 72 73 74 75 76 77 78 79 80 81 82 83 84 85 86 87 88 89 90 91 92 93 94 95 96 97 98 99 100 101 102 103 104 105 106 107 108 109 110 111 112,
[343, size=5] 	 0.0037599497 	  1 2 3 4 5 6 7 8 9 10 11 12 13 14 15 16 17 18 19 20 21 22 23 24 25 26 27 28 29 30 31 32 33 34 35 36 37 38 39 40 41 42 43 44 46 47 49 50 51 52 53 54 55 56 57 58 59 60 61 62 63 64 65 66 67 68 69 70 71 72 73 74 75 76 77 78 79 80 81 82 83 84 85 86 87 88 89 90 91 92 94 95 96 97 98 99 100 101 102 103 104 105 106 109 110 111 112,
[344, size=1] 	 0.04727437 	  1 2 3 4 5 6 7 8 9 10 11 12 13 14 15 16 17 18 19 20 21 22 23 24 25 26 27 28 29 30 31 32 33 34 35 36 37 38 39 40 41 42 43 44 45 46 47 49 50 51 52 53 54 55 56 57 58 59 60 61 62 63 64 65 66 67 68 69 70 71 72 73 74 75 76 77 78 79 80 81 82 83 84 85 86 87 88 89 90 91 92 93 94 95 96 97 98 99 100 101 102 103 104 105 106 107 108 109 110 111 112,
[345, size=2] 	 0.012861738 	  1 2 3 4 5 6 7 8 9 10 11 12 13 14 15 16 17 18 19 20 21 22 23 24 25 26 27 28 29 30 31 32 33 34 35 36 37 38 39 40 41 42 43 44 45 46 47 49 50 51 52 53 54 55 56 57 58 59 60 61 62 63 64 65 66 67 68 69 70 71 72 73 74 75 76 77 78 79 80 81 82 83 84 85 86 87 88 89 90 91 92 93 94 95 96 97 98 99 100 101 102 103 104 105 106 108 109 110 111 112,
[346, size=3] 	 0.00789988 	  1 2 3 4 5 6 7 8 9 10 11 12 13 14 15 16 17 18 19 20 21 22 23 24 25 26 27 28 29 30 31 32 33 34 35 36 37 38 39 40 41 42 43 44 45 46 47 49 50 51 52 53 54 55 56 57 58 59 60 61 62 63 64 65 66 67 68 69 70 71 72 73 74 75 76 77 78 79 80 81 82 83 84 85 86 87 88 89 90 91 92 94 95 96 97 98 99 100 101 102 103 104 105 106 108 109 110 111 112,
[347, size=4] 	 7.1610365E-4 	  1 2 3 4 5 6 7 8 9 10 11 12 13 14 15 16 17 18 19 20 21 22 23 24 25 26 27 28 29 30 31 32 33 34 35 36 37 38 39 40 41 42 43 44 45 46 47 49 50 51 52 53 54 55 56 57 58 59 60 61 62 63 64 65 66 67 68 69 70 71 72 73 74 75 76 77 78 79 80 81 82 83 84 85 86 87 88 89 90 91 92 94 95 96 97 98 99 100 101 102 103 104 105 106 109 110 111 112,
[348, size=1] 	 0.06608778 	  1 2 3 4 5 6 7 8 9 10 11 12 13 14 15 16 17 18 19 20 21 22 23 24 25 26 27 28 29 30 31 32 33 34 35 36 37 38 39 40 41 42 43 44 45 46 47 48 49 50 51 52 53 54 55 56 57 58 59 60 61 62 63 64 65 66 67 68 69 70 71 72 73 74 75 76 77 78 79 80 81 82 83 84 85 86 87 88 89 90 91 92 93 94 95 96 97 98 99 100 101 102 103 104 105 106 108 109 110 111 112,
[349, size=7] 	 0.0025584477 	  1 2 3 4 5 6 7 8 9 10 11 12 13 14 15 16 17 18 19 20 21 22 23 24 26 27 28 29 30 31 32 33 34 35 36 37 38 39 40 41 42 43 44 45 46 47 48 49 50 51 52 53 54 55 56 57 58 59 60 61 62 63 64 65 66 67 68 69 70 71 72 73 74 75 76 77 80 81 82 83 84 85 86 87 88 89 90 91 92 94 95 96 97 98 99 100 101 102 103 104 105 106 109 110 112,
[350, size=1] 	 0.08951693 	  1 2 3 4 5 6 7 8 9 10 11 12 13 14 15 16 17 18 19 20 21 22 23 24 25 26 27 28 29 30 31 32 33 34 35 36 37 38 39 40 41 42 43 44 45 46 47 48 49 50 51 52 53 54 55 56 57 58 59 60 61 62 63 64 65 66 67 68 69 70 71 72 73 74 75 76 77 78 79 80 81 82 83 84 85 86 87 88 89 90 91 92 94 95 96 97 98 99 100 101 102 103 104 105 106 107 108 109 110 111 112,
[351, size=4] 	 0.0024072006 	  1 2 3 4 5 6 7 8 9 10 11 12 13 14 15 16 17 18 19 20 21 22 23 24 25 26 27 28 29 30 31 32 33 34 35 36 37 38 39 40 41 42 43 44 45 46 47 48 49 50 51 52 53 54 55 56 57 58 59 60 61 62 63 64 65 66 67 68 69 70 71 72 73 74 75 76 77 80 81 82 83 84 85 86 87 88 89 90 91 92 94 95 96 97 98 99 100 101 102 103 104 105 106 107 109 110 111 112,
[352, size=1] 	 0.06698424 	  1 2 3 4 5 6 7 8 9 10 11 12 13 14 15 16 17 18 19 20 21 22 23 24 25 26 27 28 29 30 31 32 33 34 35 36 37 38 39 40 41 42 43 44 45 46 47 48 49 50 51 52 53 54 55 56 57 58 59 60 61 62 63 64 65 66 67 68 69 70 71 72 73 74 75 76 77 78 79 80 81 82 83 84 85 86 87 88 89 90 91 92 93 94 95 96 97 98 99 100 101 102 103 104 105 106 107 109 110 111 112,
[353, size=2] 	 0.0039844834 	  1 2 3 4 5 6 7 8 9 10 11 12 13 14 15 16 17 18 19 20 21 22 23 24 25 26 27 28 29 30 31 32 33 34 35 36 37 38 39 40 41 42 43 44 45 46 47 48 49 50 51 52 53 54 55 56 57 58 59 60 61 62 63 64 65 66 67 68 69 70 71 72 73 74 75 76 77 79 80 81 82 83 84 85 86 87 88 89 90 91 92 93 94 95 96 97 98 99 100 101 102 103 104 105 106 107 109 110 111 112,
[354, size=3] 	 0.0033492611 	  1 2 3 4 5 6 7 8 9 10 11 12 13 14 15 16 17 18 19 20 21 22 23 24 25 26 27 28 29 30 31 32 33 34 35 36 37 38 39 40 41 42 43 44 45 46 47 48 49 50 51 52 53 54 55 56 57 58 59 60 61 62 63 64 65 66 67 68 69 70 71 72 73 74 75 76 77 80 81 82 83 84 85 86 87 88 89 90 91 92 93 94 95 96 97 98 99 100 101 102 103 104 105 106 107 109 110 111 112,
[355, size=1] 	 0.02017583 	  1 2 3 4 5 6 7 8 9 10 11 12 13 14 15 16 17 18 19 20 21 22 23 24 25 26 27 28 29 30 31 32 33 34 35 36 37 38 39 40 41 42 43 44 45 46 47 48 49 50 51 52 53 54 55 56 57 58 59 60 61 62 63 64 65 66 67 68 69 70 71 72 73 74 75 76 77 79 80 81 82 83 84 85 86 87 88 89 90 91 92 93 94 95 96 97 98 99 100 101 102 103 104 105 106 107 108 109 110 111 112,
[356, size=2] 	 0.054070838 	  1 2 3 4 5 6 7 8 9 10 11 12 13 14 15 16 17 18 19 20 21 22 23 24 25 26 27 28 29 30 31 32 33 34 35 36 37 38 39 40 41 42 43 44 45 46 47 48 49 50 51 52 53 54 55 56 57 58 59 60 61 62 63 64 65 66 67 68 69 70 71 72 73 74 75 76 77 80 81 82 83 84 85 86 87 88 89 90 91 92 93 94 95 96 97 98 99 100 101 102 103 104 105 106 107 108 109 110 111 112,
[357, size=4] 	 0.0020239565 	  1 2 3 4 5 6 7 8 9 10 11 12 13 14 15 16 17 18 19 20 21 22 23 24 26 27 28 29 30 31 32 33 34 35 36 37 38 39 40 41 42 43 44 45 46 47 48 49 50 51 52 53 54 55 56 57 58 59 60 61 62 63 64 65 66 67 68 69 70 71 72 73 74 75 76 77 80 81 82 83 84 85 86 87 88 89 90 91 92 93 94 95 96 97 98 99 100 101 102 103 104 105 106 107 108 109 110 112,
[358, size=1] 	 0.021125544 	  1 2 3 4 5 6 7 8 9 10 11 12 13 14 15 16 17 18 19 20 21 22 23 24 25 26 27 28 29 30 31 32 33 34 35 36 37 38 39 40 41 42 43 44 45 46 47 48 49 50 51 52 53 54 55 56 57 58 59 60 61 62 63 64 65 66 67 68 69 70 71 72 73 74 75 76 77 78 80 81 82 83 84 85 86 87 88 89 90 91 92 93 94 95 96 97 98 99 100 101 102 103 104 105 106 107 108 109 110 111 112,
[359, size=2] 	 0.009457045 	  1 2 3 4 5 6 7 8 9 10 11 12 13 14 15 16 17 18 19 20 21 22 23 24 25 26 27 28 29 30 31 32 33 34 35 36 37 38 39 40 41 42 43 44 45 46 47 48 49 50 51 52 53 54 55 56 57 58 59 60 61 62 63 64 65 66 67 68 69 70 71 72 73 74 75 76 77 78 80 81 82 83 84 85 86 87 88 89 90 91 92 93 94 95 96 97 98 99 100 101 102 103 104 105 106 107 108 109 110 112,
[360, size=1] 	 0.10935498 	  1 2 3 4 5 6 7 8 9 10 11 12 13 14 15 16 17 18 19 20 21 22 23 24 25 26 27 28 29 30 31 32 33 34 35 36 37 38 39 40 41 42 43 44 45 46 47 48 49 50 51 52 53 54 55 56 57 58 59 60 61 62 63 64 65 66 67 68 69 70 71 72 73 74 75 76 77 78 79 80 81 82 83 84 85 86 87 88 89 90 91 92 93 94 95 96 97 98 99 100 101 102 103 104 105 106 107 108 109 110 112,
[361, size=1] 	 0.095964395 	  1 2 3 4 5 6 7 8 9 10 11 12 13 14 15 16 17 18 19 20 21 22 23 24 26 27 28 29 30 31 32 33 34 35 36 37 38 39 40 41 42 43 44 45 46 47 48 49 50 51 52 53 54 55 56 57 58 59 60 61 62 63 64 65 66 67 68 69 70 71 72 73 74 75 76 77 78 79 80 81 82 83 84 85 86 87 88 89 90 91 92 93 94 95 96 97 98 99 100 101 102 103 104 105 106 107 108 109 110 111 112,
[362, size=1] 	 0.04499564 	  1 2 3 4 5 6 7 8 9 10 11 12 13 14 15 16 17 18 19 20 21 22 23 24 25 26 27 28 29 30 31 32 33 34 35 36 37 38 39 40 41 42 43 44 45 46 47 48 49 50 51 52 53 54 55 56 57 58 59 60 61 62 63 64 65 66 67 68 69 70 71 72 73 74 75 76 77 78 79 80 81 83 84 85 86 87 88 89 90 91 92 93 94 95 96 97 98 99 100 101 102 103 104 105 106 107 108 109 110 111 112,
[363, size=2] 	 0.019871607 	  1 2 3 4 5 6 7 8 9 10 11 12 13 14 15 16 17 18 19 20 21 22 23 24 25 26 27 28 29 30 31 32 33 34 35 36 37 38 39 40 41 42 43 44 45 46 47 48 49 50 51 52 53 54 55 56 57 58 59 60 61 62 63 64 65 66 67 68 69 70 71 72 73 74 75 76 77 78 79 80 81 84 85 86 87 88 89 90 91 92 93 94 95 96 97 98 99 100 101 102 103 104 105 106 107 108 109 110 111 112,
[364, size=4] 	 0.021291414 	  1 2 3 4 5 6 7 8 9 10 11 12 13 14 15 16 17 18 19 20 21 22 23 24 25 26 27 28 29 30 31 32 33 34 35 36 37 38 39 40 41 42 43 44 45 46 47 48 49 50 51 52 53 54 55 56 57 58 59 60 61 62 63 64 65 66 67 68 69 70 71 72 73 74 75 76 77 78 79 84 85 86 87 88 89 90 91 92 93 94 95 96 97 98 99 100 101 102 103 104 105 106 107 108 109 110 111 112,
[365, size=1] 	 0.024921656 	  1 2 3 4 5 6 7 8 9 10 11 12 13 14 15 16 17 18 19 20 21 22 23 24 25 26 27 28 29 30 31 32 33 34 35 36 37 38 39 40 41 42 43 44 45 46 47 48 49 50 51 52 53 54 55 56 57 58 59 60 61 62 63 64 65 66 67 68 69 70 71 72 73 74 75 76 77 78 79 80 81 82 84 85 86 87 88 89 90 91 92 93 94 95 96 97 98 99 100 101 102 103 104 105 106 107 108 109 110 111 112,
[366, size=2] 	 0.009185878 	  1 2 3 4 5 6 7 8 9 10 11 12 13 14 15 16 17 18 19 20 21 22 23 24 25 26 27 28 29 30 31 32 33 34 35 36 37 38 39 40 41 42 43 44 45 46 47 48 49 50 51 52 53 54 55 56 57 58 59 60 61 62 63 64 65 66 67 68 69 70 71 72 73 74 75 76 77 78 79 81 82 84 85 86 87 88 89 90 91 92 93 94 95 96 97 98 99 100 101 102 103 104 105 106 107 108 109 110 111 112,
[367, size=3] 	 0.0037127982 	  1 2 3 4 5 6 7 8 9 10 11 12 13 14 15 16 17 18 19 20 21 22 23 24 25 26 27 28 29 30 31 32 33 34 35 36 37 38 39 40 41 42 43 44 45 46 47 48 49 50 51 52 53 54 55 56 57 58 59 60 61 62 63 64 65 66 67 68 69 70 71 72 73 74 75 76 77 78 79 82 84 85 86 87 88 89 90 91 92 93 94 95 96 97 98 99 100 101 102 103 104 105 106 107 108 109 110 111 112,
[368, size=1] 	 0.026457673 	  1 2 3 4 5 6 7 8 9 10 11 12 13 14 15 16 17 18 19 20 21 22 23 24 25 26 27 28 29 30 31 32 33 34 35 36 37 38 39 40 41 42 43 44 45 46 47 48 49 50 51 52 53 54 55 56 57 58 59 60 61 62 63 64 65 66 67 68 69 70 71 72 73 74 75 76 77 78 79 81 82 83 84 85 86 87 88 89 90 91 92 93 94 95 96 97 98 99 100 101 102 103 104 105 106 107 108 109 110 111 112,
[369, size=2] 	 0.0013258554 	  1 2 3 4 5 6 7 8 9 10 11 12 13 14 15 16 17 18 19 20 21 22 23 24 25 26 27 28 29 30 31 32 33 34 35 36 37 38 39 40 41 42 43 44 45 46 47 48 49 50 51 52 53 54 55 56 57 58 59 60 61 62 63 64 65 66 67 68 69 70 71 72 73 74 75 76 77 78 79 82 83 84 85 86 87 88 89 90 91 92 93 94 95 96 97 98 99 100 101 102 103 104 105 106 107 108 109 110 111 112,
[370, size=1] 	 0.035743784 	  1 2 3 4 5 6 7 8 9 10 11 12 13 14 15 16 17 18 19 20 21 22 23 24 25 26 27 28 29 30 31 32 33 34 35 36 37 38 39 40 41 42 43 44 45 46 47 48 49 50 51 52 53 54 55 56 57 58 59 60 61 62 63 64 65 66 67 68 69 70 71 72 73 74 75 76 77 78 79 80 82 83 84 85 86 87 88 89 90 91 92 93 94 95 96 97 98 99 100 101 102 103 104 105 106 107 108 109 110 111 112,
[371, size=1] 	 0.031234996 	  1 3 4 5 6 7 8 9 10 11 12 13 14 15 16 17 18 19 20 21 22 23 24 25 26 27 28 29 30 31 32 33 34 35 36 37 38 39 40 41 42 43 44 45 46 47 48 49 50 51 52 53 54 55 56 57 58 59 60 61 62 63 64 65 66 67 68 69 70 71 72 73 74 75 76 77 78 79 80 81 82 83 84 85 86 87 88 89 90 91 92 93 94 95 96 97 98 99 100 101 102 103 104 105 106 107 108 109 110 111 112,
;
END; [Splits]

BEGIN Network;
DIMENSIONS ntax=112 nvertices=2035 nedges=3697;
DRAW to_scale rotateAbout=1.0367255;
TRANSLATE
2 'CC1-IV',
3 'CC1-IV-SCCfus',
4 'CC1-IV-SCCfus-PVL',
5 'CC1-V-PVL',
6 'CC1-V-SCCfus-PVL',
7 'CC1-V-SCCfus',
8 'ST188-IV-WA38',
9 'ST188-V',
10 'ST6-V',
11 'ST1048-IV-ACME',
12 'CC7-IV',
13 'CC7-V',
14 'CC12-IV',
15 'CC12-WA59',
16 'ST59-IV-PVL-WA55',
17 'ST59-VT-PVL-Taiwan',
18 'ST59-IV-V-WA15',
19 'CC59-IV-PVL-USA1000',
20 'ST87-IV-WA24',
21 'ST59-V',
22 'ST59-IV-WA73',
23 'CC59-V-PVL',
24 'ST1303-IV',
25 'CC75-IV',
26 'ST883-IV-WA47',
27 'ST93-IV',
28 'ST93-IV-PVL-Queen',
29 'ST93-V-PVL',
30 'CC152-V-PVL',
31 'ST398-V-PVL',
32 'ST398-V',
33 'CC398-IV',
34 'ST426-MSSA',
35 'CC45-agrIV-V',
36 'CC45-agrIV-IV-V',
37 'CC45-agrIV-IV-WA23',
38 'ST45-II-USA600',
39 'ST45-IV-Berlin',
40 'ST45-V-WA4',
41 'CC45-IV-ACME',
42 'ST30-IV-tst1',
43 'ST36-II-UK-16',
44 'ST30-IV-PVL-SWP',
45 'CC30-V-PVL',
46 'CC509-ST207-V',
47 'ST22-V',
48 'ST22-V-PVL',
49 'ST22-IV-PVL',
50 'ST22-IV-ACME',
51 'ST22-IV-Barnim',
52 'ST1774-IV-ACME',
53 'CC121-V-WA22',
54 'CC361-VIII-WA28',
55 'CC361-V',
56 'CC361-IV-WA29',
57 'CC8-VIII',
58 'ST8-IIABCIrish',
59 'CC8-V',
60 'ST8-IV-PVLACME-USA300',
61 'ST8-IV-PVL-USA300',
62 'ST250-I-Early',
63 'ST247-I-North',
64 'ST239-III',
65 'CC8-IV-USA500',
66 'CC8-IV-UK14',
67 'CC8-IV-Lyon',
68 'ST254-Hannover',
69 'ST254-IV-V-Hann',
70 'ST8-UK-12-13-IrishAR43',
71 'CC8-IV-UK-6',
72 'CC8-IV-tst1',
73 'CC8-IV-PVL-sed',
74 'ST779',
75 'CC97-IV-WA54',
76 'CC97-V',
77 'CC97-I-V',
78 'CC97-V-ACME',
79 'ST72-IV-PVL-WA44',
80 'ST72-IV-USA700',
81 'CC5-II-ACME',
82 'CC5-III',
83 'ST228-I',
84 'ST5-I-Geraldine',
85 'CC5-IV-PVL',
86 'CC5-IV-Paediat',
87 'CC5-IV-VI',
88 'CC5-II-Rhine-Hesse',
89 'CC5-V',
90 'CC5-IVvar-Maltes',
91 'CC5-VI-NewPaed',
92 'CC5-Ivar',
93 'CC5-IV-SCCfus',
94 'CC5-SCCMRSAZH47',
95 'CC5-ST835',
96 'CC5-V-PVL',
97 'ST5-VIISCC-JCSC6082',
98 'ST573-V-WA10',
99 'ST772-V-PVL-Bengal',
100 'CC9-IV',
101 'CC20-V',
102 'ST834-IV-WA13',
103 'ST154-PVL',
104 'CC913-IV',
105 'CC80-IV',
106 'CC80-IV-PVL-Europ',
107 'CC15-MSSA',
108 'ST6-IV-WA51',
109 'CC88-V-PVL',
110 'CC88-VI',
111 'CC88-IV-WA2',
112 'CC88-IV-PVL',
113 'CC1-IV-PVL',
;
VERTICES
1 -0.026264288 0.0 w=5 h=5 s=n,
2 0.0 0.0 w=5 h=5 s=n,
3 -0.007820011 0.0043440713 w=5 h=5 s=n,
4 0.0073852385 0.00992702 w=5 h=5 s=n,
5 0.0015644425 0.016050674 w=5 h=5 s=n,
6 0.010776602 0.019347355 w=5 h=5 s=n,
7 0.0049313335 0.021290943 w=5 h=5 s=n,
8 -0.017798591 0.02981103 w=5 h=5 s=n,
9 -0.013169564 0.03729623 w=5 h=5 s=n,
10 -0.015049344 0.044847634 w=5 h=5 s=n,
11 -0.0050900863 0.060565002 w=5 h=5 s=n,
12 -0.041456416 0.048517738 w=5 h=5 s=n,
13 -0.035056014 0.05438234 w=5 h=5 s=n,
14 -0.042063314 0.058778107 w=5 h=5 s=n,
15 -0.035737995 0.06776681 w=5 h=5 s=n,
16 -0.02018109 0.1259669 w=5 h=5 s=n,
17 -0.026910812 0.1244254 w=5 h=5 s=n,
18 -0.04807743 0.104441606 w=5 h=5 s=n,
19 -0.05485622 0.10524729 w=5 h=5 s=n,
20 -0.05696123 0.10698556 w=5 h=5 s=n,
21 -0.055885598 0.11311734 w=5 h=5 s=n,
22 -0.06340072 0.115406 w=5 h=5 s=n,
23 -0.07283718 0.13578816 w=5 h=5 s=n,
24 -0.08296644 0.23754789 w=5 h=5 s=n,
25 -0.07785769 0.28745484 w=5 h=5 s=n,
26 -0.09369635 0.26238635 w=5 h=5 s=n,
27 -0.12572339 0.18570827 w=5 h=5 s=n,
28 -0.13061862 0.18369317 w=5 h=5 s=n,
29 -0.13243288 0.1827857 w=5 h=5 s=n,
30 -0.14483325 0.20504421 w=5 h=5 s=n,
31 -0.16924089 0.19677551 w=5 h=5 s=n,
32 -0.17942491 0.24282041 w=5 h=5 s=n,
33 -0.1827812 0.21158805 w=5 h=5 s=n,
34 -0.20831937 0.25474054 w=5 h=5 s=n,
35 -0.22544102 0.24753134 w=5 h=5 s=n,
36 -0.2301101 0.24536802 w=5 h=5 s=n,
37 -0.22924139 0.23152873 w=5 h=5 s=n,
38 -0.23996001 0.23034862 w=5 h=5 s=n,
39 -0.24396938 0.22805879 w=5 h=5 s=n,
40 -0.23661515 0.20729323 w=5 h=5 s=n,
41 -0.24516705 0.21345419 w=5 h=5 s=n,
42 -0.25597838 0.19619052 w=5 h=5 s=n,
43 -0.28472832 0.224237 w=5 h=5 s=n,
44 -0.2647081 0.19694938 w=5 h=5 s=n,
45 -0.2481976 0.16913009 w=5 h=5 s=n,
46 -0.23669313 0.12456673 w=5 h=5 s=n,
47 -0.2587931 0.117849916 w=5 h=5 s=n,
48 -0.2627465 0.11788727 w=5 h=5 s=n,
49 -0.2622869 0.11310284 w=5 h=5 s=n,
50 -0.2835899 0.12050722 w=5 h=5 s=n,
51 -0.29662284 0.121157564 w=5 h=5 s=n,
52 -0.26735446 0.07803065 w=5 h=5 s=n,
53 -0.2402648 0.041553605 w=5 h=5 s=n,
54 -0.24747044 0.031769983 w=5 h=5 s=n,
55 -0.21926707 0.011813004 w=5 h=5 s=n,
56 -0.2378567 0.008691999 w=5 h=5 s=n,
57 -0.28888887 -0.027059343 w=5 h=5 s=n,
58 -0.30346563 -0.039792225 w=5 h=5 s=n,
59 -0.24508223 -0.046020035 w=5 h=5 s=n,
60 -0.25833616 -0.052083302 w=5 h=5 s=n,
61 -0.26326895 -0.055776585 w=5 h=5 s=n,
62 -0.2734885 -0.062432997 w=5 h=5 s=n,
63 -0.27591115 -0.06747062 w=5 h=5 s=n,
64 -0.3292951 -0.090391524 w=5 h=5 s=n,
65 -0.26875532 -0.08053735 w=5 h=5 s=n,
66 -0.2785668 -0.08804501 w=5 h=5 s=n,
67 -0.2744078 -0.09025339 w=5 h=5 s=n,
68 -0.25734904 -0.086517535 w=5 h=5 s=n,
69 -0.25122586 -0.08554345 w=5 h=5 s=n,
70 -0.2449791 -0.086308375 w=5 h=5 s=n,
71 -0.23542427 -0.0837275 w=5 h=5 s=n,
72 -0.24179424 -0.10274806 w=5 h=5 s=n,
73 -0.22346723 -0.096586004 w=5 h=5 s=n,
74 -0.21702494 -0.12926126 w=5 h=5 s=n,
75 -0.17935416 -0.0920646 w=5 h=5 s=n,
76 -0.17456824 -0.0911054 w=5 h=5 s=n,
77 -0.18069255 -0.10898832 w=5 h=5 s=n,
78 -0.19039667 -0.13760918 w=5 h=5 s=n,
79 -0.16537888 -0.11430008 w=5 h=5 s=n,
80 -0.15599227 -0.10786823 w=5 h=5 s=n,
81 -0.15156966 -0.1767465 w=5 h=5 s=n,
82 -0.13611506 -0.13443989 w=5 h=5 s=n,
83 -0.13905282 -0.1752259 w=5 h=5 s=n,
84 -0.12788133 -0.15536337 w=5 h=5 s=n,
85 -0.124323554 -0.15636301 w=5 h=5 s=n,
86 -0.1200112 -0.19506751 w=5 h=5 s=n,
87 -0.1173439 -0.17190282 w=5 h=5 s=n,
88 -0.111684486 -0.18473649 w=5 h=5 s=n,
89 -0.11266759 -0.14648171 w=5 h=5 s=n,
90 -0.10841286 -0.13396238 w=5 h=5 s=n,
91 -0.1010869 -0.14778234 w=5 h=5 s=n,
92 -0.104957454 -0.12638815 w=5 h=5 s=n,
93 -0.0997142 -0.12205531 w=5 h=5 s=n,
94 -0.10174183 -0.111378774 w=5 h=5 s=n,
95 -0.092547655 -0.12512784 w=5 h=5 s=n,
96 -0.08817741 -0.12630442 w=5 h=5 s=n,
97 -0.08472927 -0.1092904 w=5 h=5 s=n,
98 -0.07146326 -0.09336968 w=5 h=5 s=n,
99 -0.049294252 -0.11255451 w=5 h=5 s=n,
100 -0.05368604 -0.0952188 w=5 h=5 s=n,
101 -0.05783668 -0.07883692 w=5 h=5 s=n,
102 -0.038496032 -0.06378081 w=5 h=5 s=n,
103 -0.024012996 -0.0674873 w=5 h=5 s=n,
104 -0.040115457 -0.05004321 w=5 h=5 s=n,
105 -0.03279967 -0.047034185 w=5 h=5 s=n,
106 -0.026224222 -0.048279043 w=5 h=5 s=n,
107 0.002729444 -0.05330068 w=5 h=5 s=n,
108 -0.016354425 -0.039284695 w=5 h=5 s=n,
109 -0.013338554 -0.026499975 w=5 h=5 s=n,
110 -0.01960911 -0.022003168 w=5 h=5 s=n,
111 -0.01916742 -0.017223895 w=5 h=5 s=n,
112 -0.018741611 -0.015002029 w=5 h=5 s=n,
113 -0.008567174 -0.0021298178 w=5 h=5 s=n,
114 -0.03975303 -3.7845765E-4 w=5 h=5 s=n,
115 -0.032695513 5.4246746E-4 w=5 h=5 s=n,
116 -0.046184257 1.6400976E-4 w=5 h=5 s=n,
117 -0.050331946 4.7636884E-5 w=5 h=5 s=n,
118 -0.04390072 -4.9483054E-4 w=5 h=5 s=n,
119 -0.0563366 7.34153E-4 w=5 h=5 s=n,
120 -0.060484286 6.1778014E-4 w=5 h=5 s=n,
121 -0.08984899 -0.002690827 w=5 h=5 s=n,
122 -0.07969665 -0.00326097 w=5 h=5 s=n,
123 -0.07326542 -0.0038034376 w=5 h=5 s=n,
124 -0.093144275 -0.0032507193 w=5 h=5 s=n,
125 -0.082991935 -0.0038208626 w=5 h=5 s=n,
126 -0.07656071 -0.00436333 w=5 h=5 s=n,
127 -0.09421433 -0.002690827 w=5 h=5 s=n,
128 -0.097509615 -0.0032507193 w=5 h=5 s=n,
129 -0.098474346 -0.0034709126 w=5 h=5 s=n,
130 -0.094109006 -0.0034709126 w=5 h=5 s=n,
131 -0.08395667 -0.0040410557 w=5 h=5 s=n,
132 -0.07752544 -0.004583523 w=5 h=5 s=n,
133 -0.10711345 -0.0037900594 w=5 h=5 s=n,
134 -0.10807818 -0.004010252 w=5 h=5 s=n,
135 -0.11106619 -0.0048710834 w=5 h=5 s=n,
136 -0.10146236 -0.0043317433 w=5 h=5 s=n,
137 -0.09709702 -0.0043317433 w=5 h=5 s=n,
138 -0.08694468 -0.0049018865 w=5 h=5 s=n,
139 -0.08051345 -0.005444354 w=5 h=5 s=n,
140 -0.061903574 0.0010266697 w=5 h=5 s=n,
141 -0.09126827 -0.0022819373 w=5 h=5 s=n,
142 -0.09563361 -0.0022819373 w=5 h=5 s=n,
143 -0.098928906 -0.0028418298 w=5 h=5 s=n,
144 -0.10853274 -0.0033811696 w=5 h=5 s=n,
145 -0.109497465 -0.0036013627 w=5 h=5 s=n,
146 -0.112485476 -0.0044621937 w=5 h=5 s=n,
147 -0.062133223 0.0010790853 w=5 h=5 s=n,
148 -0.09149792 -0.0022295217 w=5 h=5 s=n,
149 -0.09586326 -0.0022295217 w=5 h=5 s=n,
150 -0.09915855 -0.0027894143 w=5 h=5 s=n,
151 -0.10876238 -0.003328754 w=5 h=5 s=n,
152 -0.109727114 -0.0035489474 w=5 h=5 s=n,
153 -0.112715125 -0.004409778 w=5 h=5 s=n,
154 -0.11129584 -0.0048186677 w=5 h=5 s=n,
155 -0.06280311 0.0012123344 w=5 h=5 s=n,
156 -0.09216781 -0.0020962728 w=5 h=5 s=n,
157 -0.09653315 -0.0020962728 w=5 h=5 s=n,
158 -0.09982844 -0.002656165 w=5 h=5 s=n,
159 -0.10943227 -0.003195505 w=5 h=5 s=n,
160 -0.110397 -0.0034156982 w=5 h=5 s=n,
161 -0.113385014 -0.004276529 w=5 h=5 s=n,
162 -0.11196573 -0.0046854187 w=5 h=5 s=n,
163 -0.113736406 -0.0043362333 w=5 h=5 s=n,
164 -0.11231712 -0.0047451225 w=5 h=5 s=n,
165 -0.11164723 -0.004878372 w=5 h=5 s=n,
166 -0.111417584 -0.0049307873 w=5 h=5 s=n,
167 -0.12389546 -0.006956787 w=5 h=5 s=n,
168 -0.109489605 -0.0030764597 w=5 h=5 s=n,
169 -0.110454336 -0.0032966528 w=5 h=5 s=n,
170 -0.11344235 -0.0041574836 w=5 h=5 s=n,
171 -0.11379374 -0.004217188 w=5 h=5 s=n,
172 -0.12395278 -0.0068377415 w=5 h=5 s=n,
173 -0.09693714 2.8145124E-4 w=5 h=5 s=n,
174 -0.10023243 -2.7844118E-4 w=5 h=5 s=n,
175 -0.109836265 -8.177811E-4 w=5 h=5 s=n,
176 -0.1098936 -6.987357E-4 w=5 h=5 s=n,
177 -0.11085833 -9.189289E-4 w=5 h=5 s=n,
178 -0.11384633 -0.0017797597 w=5 h=5 s=n,
179 -0.11419773 -0.0018394638 w=5 h=5 s=n,
180 -0.12435678 -0.0044600177 w=5 h=5 s=n,
181 -0.12686229 -0.0068287724 w=5 h=5 s=n,
182 -0.1264583 -0.009206496 w=5 h=5 s=n,
183 -0.12640098 -0.009325542 w=5 h=5 s=n,
184 -0.06203786 0.0014968939 w=5 h=5 s=n,
185 -0.062707745 0.0016301431 w=5 h=5 s=n,
186 -0.09207245 -0.001678464 w=5 h=5 s=n,
187 -0.09643779 -0.001678464 w=5 h=5 s=n,
188 -0.096841775 6.9926E-4 w=5 h=5 s=n,
189 -0.10013707 1.3936752E-4 w=5 h=5 s=n,
190 -0.109740905 -3.9997234E-4 w=5 h=5 s=n,
191 -0.10979824 -2.8092702E-4 w=5 h=5 s=n,
192 -0.11076296 -5.011202E-4 w=5 h=5 s=n,
193 -0.11375097 -0.001361951 w=5 h=5 s=n,
194 -0.11410236 -0.0014216551 w=5 h=5 s=n,
195 -0.12426142 -0.0040422087 w=5 h=5 s=n,
196 -0.12847109 -0.009739664 w=5 h=5 s=n,
197 -0.12806709 -0.012117388 w=5 h=5 s=n,
198 -0.12800977 -0.012236433 w=5 h=5 s=n,
199 -0.12550426 -0.009867678 w=5 h=5 s=n,
200 -0.062367354 0.0033414296 w=5 h=5 s=n,
201 -0.091732055 3.282242E-5 w=5 h=5 s=n,
202 -0.09609739 3.282242E-5 w=5 h=5 s=n,
203 -0.09650138 0.0024105464 w=5 h=5 s=n,
204 -0.099796675 0.0018506539 w=5 h=5 s=n,
205 -0.10940051 0.0013113141 w=5 h=5 s=n,
206 -0.109457836 0.0014303593 w=5 h=5 s=n,
207 -0.11042257 0.0012101663 w=5 h=5 s=n,
208 -0.11341058 3.4933543E-4 w=5 h=5 s=n,
209 -0.11376197 2.896313E-4 w=5 h=5 s=n,
210 -0.12392102 -0.0023309225 w=5 h=5 s=n,
211 -0.11394594 6.224914E-4 w=5 h=5 s=n,
212 -0.124104984 -0.0019980625 w=5 h=5 s=n,
213 -0.12444538 -0.0037093488 w=5 h=5 s=n,
214 -0.124540746 -0.0041271574 w=5 h=5 s=n,
215 -0.12704626 -0.0064959126 w=5 h=5 s=n,
216 -0.12865505 -0.009406804 w=5 h=5 s=n,
217 -0.096280634 0.003974153 w=5 h=5 s=n,
218 -0.09957593 0.0034142607 w=5 h=5 s=n,
219 -0.109179765 0.0028749206 w=5 h=5 s=n,
220 -0.1092371 0.002993966 w=5 h=5 s=n,
221 -0.11020182 0.002773773 w=5 h=5 s=n,
222 -0.11318983 0.0019129422 w=5 h=5 s=n,
223 -0.11354122 0.001853238 w=5 h=5 s=n,
224 -0.11372519 0.0021860981 w=5 h=5 s=n,
225 -0.12388424 -4.3445572E-4 w=5 h=5 s=n,
226 -0.1142995 0.0051754466 w=5 h=5 s=n,
227 -0.11448346 0.0055083064 w=5 h=5 s=n,
228 -0.12464251 0.0028877528 w=5 h=5 s=n,
229 -0.12486326 0.001324146 w=5 h=5 s=n,
230 -0.12520365 -3.871403E-4 w=5 h=5 s=n,
231 -0.12529902 -8.04949E-4 w=5 h=5 s=n,
232 -0.12780453 -0.003173704 w=5 h=5 s=n,
233 -0.11546719 0.008234482 w=5 h=5 s=n,
234 -0.11565116 0.008567343 w=5 h=5 s=n,
235 -0.1258102 0.0059467885 w=5 h=5 s=n,
236 -0.12603095 0.0043831817 w=5 h=5 s=n,
237 -0.12637135 0.0026718955 w=5 h=5 s=n,
238 -0.1264667 0.0022540868 w=5 h=5 s=n,
239 -0.12897222 -1.14668175E-4 w=5 h=5 s=n,
240 -0.12821396 -0.0034368767 w=5 h=5 s=n,
241 -0.13209605 -0.013979105 w=5 h=5 s=n,
242 -0.1319121 -0.014311966 w=5 h=5 s=n,
243 -0.1315081 -0.01668969 w=5 h=5 s=n,
244 -0.13145077 -0.016808735 w=5 h=5 s=n,
245 -0.109220676 0.0030906 w=5 h=5 s=n,
246 -0.11018541 0.0028704067 w=5 h=5 s=n,
247 -0.11317341 0.002009576 w=5 h=5 s=n,
248 -0.11352481 0.0019498719 w=5 h=5 s=n,
249 -0.11428308 0.00527208 w=5 h=5 s=n,
250 -0.11545078 0.008331116 w=5 h=5 s=n,
251 -0.11563474 0.008663977 w=5 h=5 s=n,
252 -0.12579378 0.0060434225 w=5 h=5 s=n,
253 -0.11575334 0.008950289 w=5 h=5 s=n,
254 -0.12591238 0.0063297357 w=5 h=5 s=n,
255 -0.1259288 0.0062331017 w=5 h=5 s=n,
256 -0.12614955 0.004669495 w=5 h=5 s=n,
257 -0.12648994 0.0029582086 w=5 h=5 s=n,
258 -0.1265853 0.0025404 w=5 h=5 s=n,
259 -0.12909082 1.7164495E-4 w=5 h=5 s=n,
260 -0.12833254 -0.0031505635 w=5 h=5 s=n,
261 -0.13353571 -0.015590079 w=5 h=5 s=n,
262 -0.13335174 -0.01592294 w=5 h=5 s=n,
263 -0.13294776 -0.018300664 w=5 h=5 s=n,
264 -0.13289043 -0.018419709 w=5 h=5 s=n,
265 -0.13440198 -0.023348358 w=5 h=5 s=n,
266 -0.13434464 -0.023467403 w=5 h=5 s=n,
267 -0.13290499 -0.021856429 w=5 h=5 s=n,
268 -0.12946399 -0.017284127 w=5 h=5 s=n,
269 -0.12695846 -0.014915372 w=5 h=5 s=n,
270 -0.12050546 0.018148918 w=5 h=5 s=n,
271 -0.13066451 0.015528364 w=5 h=5 s=n,
272 -0.13068093 0.01543173 w=5 h=5 s=n,
273 -0.13090166 0.013868123 w=5 h=5 s=n,
274 -0.13124207 0.012156838 w=5 h=5 s=n,
275 -0.13133743 0.011739029 w=5 h=5 s=n,
276 -0.13384295 0.009370274 w=5 h=5 s=n,
277 -0.13308467 0.006048065 w=5 h=5 s=n,
278 -0.13296607 0.005761752 w=5 h=5 s=n,
279 -0.13465415 -0.024139572 w=5 h=5 s=n,
280 -0.13459682 -0.024258617 w=5 h=5 s=n,
281 -0.13315718 -0.022647643 w=5 h=5 s=n,
282 -0.12971616 -0.018075341 w=5 h=5 s=n,
283 -0.1341995 -0.02485325 w=5 h=5 s=n,
284 -0.13275985 -0.023242276 w=5 h=5 s=n,
285 -0.12931883 -0.018669974 w=5 h=5 s=n,
286 -0.12906666 -0.01787876 w=5 h=5 s=n,
287 -0.12656115 -0.015510005 w=5 h=5 s=n,
288 -0.12510693 -0.010462311 w=5 h=5 s=n,
289 -0.123498134 -0.00755142 w=5 h=5 s=n,
290 -0.11333909 -0.004930866 w=5 h=5 s=n,
291 -0.1119198 -0.0053397557 w=5 h=5 s=n,
292 -0.11124991 -0.005473005 w=5 h=5 s=n,
293 -0.11102027 -0.0055254204 w=5 h=5 s=n,
294 -0.11066887 -0.005465716 w=5 h=5 s=n,
295 -0.10106503 -0.0049263765 w=5 h=5 s=n,
296 -0.09669969 -0.0049263765 w=5 h=5 s=n,
297 -0.08654735 -0.0054965196 w=5 h=5 s=n,
298 -0.08011613 -0.006038987 w=5 h=5 s=n,
299 -0.11812147 0.014667465 w=5 h=5 s=n,
300 -0.12287359 0.023866095 w=5 h=5 s=n,
301 -0.13303263 0.021245541 w=5 h=5 s=n,
302 -0.13304906 0.021148907 w=5 h=5 s=n,
303 -0.1332698 0.0195853 w=5 h=5 s=n,
304 -0.1336102 0.017874014 w=5 h=5 s=n,
305 -0.13370556 0.017456206 w=5 h=5 s=n,
306 -0.13621108 0.01508745 w=5 h=5 s=n,
307 -0.11436823 0.008307051 w=5 h=5 s=n,
308 -0.11553593 0.011366086 w=5 h=5 s=n,
309 -0.11571989 0.011698946 w=5 h=5 s=n,
310 -0.11583849 0.01198526 w=5 h=5 s=n,
311 -0.11820662 0.017702436 w=5 h=5 s=n,
312 -0.12295874 0.026901064 w=5 h=5 s=n,
313 -0.1331178 0.02428051 w=5 h=5 s=n,
314 -0.13313422 0.024183877 w=5 h=5 s=n,
315 -0.109044746 0.0036425786 w=5 h=5 s=n,
316 -0.11000947 0.0034223855 w=5 h=5 s=n,
317 -0.11299748 0.0025615548 w=5 h=5 s=n,
318 -0.11334888 0.0025018505 w=5 h=5 s=n,
319 -0.11410715 0.0058240592 w=5 h=5 s=n,
320 -0.1141923 0.008859029 w=5 h=5 s=n,
321 -0.11536 0.011918065 w=5 h=5 s=n,
322 -0.11554396 0.012250925 w=5 h=5 s=n,
323 -0.11566256 0.012537238 w=5 h=5 s=n,
324 -0.11803069 0.018254414 w=5 h=5 s=n,
325 -0.12278281 0.027453043 w=5 h=5 s=n,
326 -0.13294186 0.024832489 w=5 h=5 s=n,
327 -0.1417108 0.04442913 w=5 h=5 s=n,
328 -0.14188673 0.043877155 w=5 h=5 s=n,
329 -0.14190315 0.04378052 w=5 h=5 s=n,
330 -0.14181799 0.04074555 w=5 h=5 s=n,
331 -0.14203873 0.039181944 w=5 h=5 s=n,
332 -0.14237913 0.037470657 w=5 h=5 s=n,
333 -0.1424745 0.037052847 w=5 h=5 s=n,
334 -0.14498001 0.03468409 w=5 h=5 s=n,
335 -0.12297084 0.02799041 w=5 h=5 s=n,
336 -0.1331299 0.025369855 w=5 h=5 s=n,
337 -0.14189883 0.0449665 w=5 h=5 s=n,
338 -0.14207476 0.04441452 w=5 h=5 s=n,
339 -0.14209118 0.044317886 w=5 h=5 s=n,
340 -0.14200602 0.041282915 w=5 h=5 s=n,
341 -0.14222677 0.03971931 w=5 h=5 s=n,
342 -0.14256717 0.038008023 w=5 h=5 s=n,
343 -0.14266253 0.037590213 w=5 h=5 s=n,
344 -0.14516804 0.035221457 w=5 h=5 s=n,
345 -0.11331469 0.0027439946 w=5 h=5 s=n,
346 -0.11407296 0.006066203 w=5 h=5 s=n,
347 -0.11415812 0.009101174 w=5 h=5 s=n,
348 -0.11532581 0.012160209 w=5 h=5 s=n,
349 -0.11550978 0.012493069 w=5 h=5 s=n,
350 -0.11562837 0.012779382 w=5 h=5 s=n,
351 -0.11799651 0.018496558 w=5 h=5 s=n,
352 -0.12274863 0.027695186 w=5 h=5 s=n,
353 -0.12293666 0.028232554 w=5 h=5 s=n,
354 -0.13309571 0.025611999 w=5 h=5 s=n,
355 -0.14186464 0.045208644 w=5 h=5 s=n,
356 -0.14204058 0.044656664 w=5 h=5 s=n,
357 -0.113809176 0.013238007 w=5 h=5 s=n,
358 -0.114976875 0.016297042 w=5 h=5 s=n,
359 -0.11516084 0.016629903 w=5 h=5 s=n,
360 -0.115279436 0.016916215 w=5 h=5 s=n,
361 -0.117647566 0.022633392 w=5 h=5 s=n,
362 -0.12239969 0.03183202 w=5 h=5 s=n,
363 -0.122587726 0.032369386 w=5 h=5 s=n,
364 -0.13274677 0.029748833 w=5 h=5 s=n,
365 -0.1415157 0.049345475 w=5 h=5 s=n,
366 -0.14169164 0.0487935 w=5 h=5 s=n,
367 -0.14172582 0.048551355 w=5 h=5 s=n,
368 -0.13429372 -0.026042603 w=5 h=5 s=n,
369 -0.1338964 -0.026637236 w=5 h=5 s=n,
370 -0.13245673 -0.025026262 w=5 h=5 s=n,
371 -0.12901573 -0.02045396 w=5 h=5 s=n,
372 -0.12876354 -0.019662745 w=5 h=5 s=n,
373 -0.12625803 -0.017293992 w=5 h=5 s=n,
374 -0.12480382 -0.012246297 w=5 h=5 s=n,
375 -0.12319502 -0.009335405 w=5 h=5 s=n,
376 -0.11773545 0.023075229 w=5 h=5 s=n,
377 -0.122487575 0.032273855 w=5 h=5 s=n,
378 -0.122675605 0.032811224 w=5 h=5 s=n,
379 -0.13283466 0.030190669 w=5 h=5 s=n,
380 -0.14160359 0.049787313 w=5 h=5 s=n,
381 -0.14177953 0.049235333 w=5 h=5 s=n,
382 -0.14181371 0.04899319 w=5 h=5 s=n,
383 -0.14216265 0.044856355 w=5 h=5 s=n,
384 -0.14217907 0.04475972 w=5 h=5 s=n,
385 -0.12376494 0.037583884 w=5 h=5 s=n,
386 -0.13392399 0.034963332 w=5 h=5 s=n,
387 -0.14269292 0.054559976 w=5 h=5 s=n,
388 -0.14286885 0.054007996 w=5 h=5 s=n,
389 -0.14290304 0.053765852 w=5 h=5 s=n,
390 -0.14325197 0.049629018 w=5 h=5 s=n,
391 -0.14326839 0.049532384 w=5 h=5 s=n,
392 -0.113577954 0.014400452 w=5 h=5 s=n,
393 -0.11474565 0.017459488 w=5 h=5 s=n,
394 -0.11492962 0.017792348 w=5 h=5 s=n,
395 -0.11504821 0.01807866 w=5 h=5 s=n,
396 -0.117416345 0.023795838 w=5 h=5 s=n,
397 -0.117504224 0.024237674 w=5 h=5 s=n,
398 -0.12225635 0.033436302 w=5 h=5 s=n,
399 -0.122444384 0.033973668 w=5 h=5 s=n,
400 -0.12353371 0.03874633 w=5 h=5 s=n,
401 -0.13369276 0.036125775 w=5 h=5 s=n,
402 -0.1424617 0.05572242 w=5 h=5 s=n,
403 -0.15205741 0.06847289 w=5 h=5 s=n,
404 -0.15228863 0.067310445 w=5 h=5 s=n,
405 -0.15246457 0.06675847 w=5 h=5 s=n,
406 -0.15249875 0.066516325 w=5 h=5 s=n,
407 -0.15284769 0.06237949 w=5 h=5 s=n,
408 -0.15286411 0.062282857 w=5 h=5 s=n,
409 -0.15177478 0.057510193 w=5 h=5 s=n,
410 -0.15168689 0.05706836 w=5 h=5 s=n,
411 -0.15160175 0.054033387 w=5 h=5 s=n,
412 -0.15182248 0.052469783 w=5 h=5 s=n,
413 -0.15216288 0.050758496 w=5 h=5 s=n,
414 -0.15225825 0.050340686 w=5 h=5 s=n,
415 -0.15476376 0.04797193 w=5 h=5 s=n,
416 -0.15457572 0.047434565 w=5 h=5 s=n,
417 -0.14580679 0.027837923 w=5 h=5 s=n,
418 -0.15563662 0.071495265 w=5 h=5 s=n,
419 -0.15586784 0.070332825 w=5 h=5 s=n,
420 -0.15604378 0.06978084 w=5 h=5 s=n,
421 -0.15607797 0.0695387 w=5 h=5 s=n,
422 -0.1564269 0.06540187 w=5 h=5 s=n,
423 -0.15644333 0.06530523 w=5 h=5 s=n,
424 -0.155354 0.06053257 w=5 h=5 s=n,
425 -0.1552661 0.060090736 w=5 h=5 s=n,
426 -0.15518095 0.057055764 w=5 h=5 s=n,
427 -0.15540169 0.05549216 w=5 h=5 s=n,
428 -0.1557421 0.053780872 w=5 h=5 s=n,
429 -0.15583746 0.053363062 w=5 h=5 s=n,
430 -0.15834297 0.050994307 w=5 h=5 s=n,
431 -0.15815493 0.05045694 w=5 h=5 s=n,
432 -0.149386 0.030860297 w=5 h=5 s=n,
433 -0.13979028 0.018109826 w=5 h=5 s=n,
434 -0.13742216 0.012392649 w=5 h=5 s=n,
435 -0.13666388 0.009070441 w=5 h=5 s=n,
436 -0.13654529 0.008784127 w=5 h=5 s=n,
437 -0.13179317 -4.1450097E-4 w=5 h=5 s=n,
438 -0.13062547 -0.0034735368 w=5 h=5 s=n,
439 -0.13296132 -0.032741025 w=5 h=5 s=n,
440 -0.132564 -0.033335656 w=5 h=5 s=n,
441 -0.13112435 -0.03172468 w=5 h=5 s=n,
442 -0.12768333 -0.02715238 w=5 h=5 s=n,
443 -0.12743115 -0.026361166 w=5 h=5 s=n,
444 -0.124925636 -0.023992412 w=5 h=5 s=n,
445 -0.12347142 -0.018944718 w=5 h=5 s=n,
446 -0.12186263 -0.016033826 w=5 h=5 s=n,
447 -0.13137656 -0.0388846 w=5 h=5 s=n,
448 -0.13097924 -0.039479233 w=5 h=5 s=n,
449 -0.1295396 -0.037868258 w=5 h=5 s=n,
450 -0.12609857 -0.033295956 w=5 h=5 s=n,
451 -0.1258464 -0.03250474 w=5 h=5 s=n,
452 -0.12334088 -0.030135985 w=5 h=5 s=n,
453 -0.12188667 -0.025088292 w=5 h=5 s=n,
454 -0.120277874 -0.022177402 w=5 h=5 s=n,
455 -0.12161028 -0.015478981 w=5 h=5 s=n,
456 -0.1437127 0.060064755 w=5 h=5 s=n,
457 -0.15330842 0.07281523 w=5 h=5 s=n,
458 -0.15688764 0.075837605 w=5 h=5 s=n,
459 -0.15711886 0.07467516 w=5 h=5 s=n,
460 -0.15729478 0.07412318 w=5 h=5 s=n,
461 -0.15732898 0.07388104 w=5 h=5 s=n,
462 -0.1576779 0.0697442 w=5 h=5 s=n,
463 -0.15769432 0.069647565 w=5 h=5 s=n,
464 -0.13235532 -0.036307685 w=5 h=5 s=n,
465 -0.13077056 -0.04245126 w=5 h=5 s=n,
466 -0.13037324 -0.043045893 w=5 h=5 s=n,
467 -0.1289336 -0.041434918 w=5 h=5 s=n,
468 -0.12549257 -0.036862615 w=5 h=5 s=n,
469 -0.1252404 -0.0360714 w=5 h=5 s=n,
470 -0.12273488 -0.033702645 w=5 h=5 s=n,
471 -0.12128067 -0.028654953 w=5 h=5 s=n,
472 -0.119671874 -0.025744062 w=5 h=5 s=n,
473 -0.12911965 -0.047397207 w=5 h=5 s=n,
474 -0.12768 -0.04578623 w=5 h=5 s=n,
475 -0.12423899 -0.04121393 w=5 h=5 s=n,
476 -0.1239868 -0.040422715 w=5 h=5 s=n,
477 -0.12148129 -0.038053963 w=5 h=5 s=n,
478 -0.12002707 -0.03300627 w=5 h=5 s=n,
479 -0.118418284 -0.030095376 w=5 h=5 s=n,
480 -0.119024284 -0.026528716 w=5 h=5 s=n,
481 -0.12035668 -0.019830296 w=5 h=5 s=n,
482 -0.15662703 0.07674526 w=5 h=5 s=n,
483 -0.16020624 0.07976764 w=5 h=5 s=n,
484 -0.16043746 0.07860519 w=5 h=5 s=n,
485 -0.1606134 0.07805321 w=5 h=5 s=n,
486 -0.16064759 0.07781107 w=5 h=5 s=n,
487 -0.16099653 0.07367423 w=5 h=5 s=n,
488 -0.16101295 0.0735776 w=5 h=5 s=n,
489 -0.15976194 0.069235265 w=5 h=5 s=n,
490 -0.1586726 0.0644626 w=5 h=5 s=n,
491 -0.15858473 0.06402077 w=5 h=5 s=n,
492 -0.15849957 0.060985796 w=5 h=5 s=n,
493 -0.15872031 0.059422188 w=5 h=5 s=n,
494 -0.1590607 0.0577109 w=5 h=5 s=n,
495 -0.15915607 0.057293095 w=5 h=5 s=n,
496 -0.16166158 0.05492434 w=5 h=5 s=n,
497 -0.16147356 0.054386973 w=5 h=5 s=n,
498 -0.15270461 0.03479033 w=5 h=5 s=n,
499 -0.16121995 0.08160335 w=5 h=5 s=n,
500 -0.16479917 0.08462572 w=5 h=5 s=n,
501 -0.16503039 0.08346328 w=5 h=5 s=n,
502 -0.16520631 0.0829113 w=5 h=5 s=n,
503 -0.16524051 0.082669154 w=5 h=5 s=n,
504 -0.16558944 0.07853232 w=5 h=5 s=n,
505 -0.16560586 0.07843569 w=5 h=5 s=n,
506 -0.16435486 0.07409335 w=5 h=5 s=n,
507 -0.16326553 0.069320686 w=5 h=5 s=n,
508 -0.16317764 0.06887885 w=5 h=5 s=n,
509 -0.1630925 0.06584388 w=5 h=5 s=n,
510 -0.16331322 0.06428028 w=5 h=5 s=n,
511 -0.16365363 0.06256899 w=5 h=5 s=n,
512 -0.163749 0.062151182 w=5 h=5 s=n,
513 -0.1662545 0.059782427 w=5 h=5 s=n,
514 -0.16606647 0.05924506 w=5 h=5 s=n,
515 -0.15729754 0.039648417 w=5 h=5 s=n,
516 -0.15397893 0.035718385 w=5 h=5 s=n,
517 -0.1443832 0.022967914 w=5 h=5 s=n,
518 -0.14201507 0.017250737 w=5 h=5 s=n,
519 -0.14125681 0.01392853 w=5 h=5 s=n,
520 -0.12870866 -0.048686676 w=5 h=5 s=n,
521 -0.127269 -0.0470757 w=5 h=5 s=n,
522 -0.123827994 -0.042503398 w=5 h=5 s=n,
523 -0.123575814 -0.041712184 w=5 h=5 s=n,
524 -0.1210703 -0.039343428 w=5 h=5 s=n,
525 -0.119616084 -0.034295734 w=5 h=5 s=n,
526 -0.118007295 -0.031384844 w=5 h=5 s=n,
527 -0.11861329 -0.027818184 w=5 h=5 s=n,
528 -0.11994569 -0.021119764 w=5 h=5 s=n,
529 -0.13350517 -0.0045727757 w=5 h=5 s=n,
530 -0.12992595 -0.0075951517 w=5 h=5 s=n,
531 -0.13153476 -0.010506043 w=5 h=5 s=n,
532 -0.13497576 -0.015078344 w=5 h=5 s=n,
533 -0.1364154 -0.01668932 w=5 h=5 s=n,
534 -0.13623145 -0.01702218 w=5 h=5 s=n,
535 -0.13582745 -0.019399902 w=5 h=5 s=n,
536 -0.13728167 -0.024447596 w=5 h=5 s=n,
537 -0.13753386 -0.025238812 w=5 h=5 s=n,
538 -0.13747653 -0.025357857 w=5 h=5 s=n,
539 -0.12854865 -0.050267786 w=5 h=5 s=n,
540 -0.12813766 -0.051557254 w=5 h=5 s=n,
541 -0.12669802 -0.049946282 w=5 h=5 s=n,
542 -0.123257 -0.04537398 w=5 h=5 s=n,
543 -0.12300482 -0.044582766 w=5 h=5 s=n,
544 -0.120499305 -0.04221401 w=5 h=5 s=n,
545 -0.11904509 -0.037166316 w=5 h=5 s=n,
546 -0.1174363 -0.034255426 w=5 h=5 s=n,
547 -0.12713088 -0.05419474 w=5 h=5 s=n,
548 -0.12569124 -0.052583765 w=5 h=5 s=n,
549 -0.12225022 -0.048011463 w=5 h=5 s=n,
550 -0.12199804 -0.04722025 w=5 h=5 s=n,
551 -0.11949252 -0.044851493 w=5 h=5 s=n,
552 -0.11803831 -0.0398038 w=5 h=5 s=n,
553 -0.116429515 -0.03689291 w=5 h=5 s=n,
554 -0.11700051 -0.034022328 w=5 h=5 s=n,
555 -0.11760651 -0.03045567 w=5 h=5 s=n,
556 -0.11893891 -0.02375725 w=5 h=5 s=n,
557 -0.16560555 0.08552807 w=5 h=5 s=n,
558 -0.16583678 0.08436563 w=5 h=5 s=n,
559 -0.1660127 0.083813645 w=5 h=5 s=n,
560 -0.16604689 0.0835715 w=5 h=5 s=n,
561 -0.16639583 0.07943467 w=5 h=5 s=n,
562 -0.16641225 0.07933804 w=5 h=5 s=n,
563 -0.16516124 0.0749957 w=5 h=5 s=n,
564 -0.16407192 0.07022303 w=5 h=5 s=n,
565 -0.16398403 0.0697812 w=5 h=5 s=n,
566 -0.16389887 0.06674623 w=5 h=5 s=n,
567 -0.16411962 0.065182626 w=5 h=5 s=n,
568 -0.16446002 0.06347134 w=5 h=5 s=n,
569 -0.16455537 0.063053526 w=5 h=5 s=n,
570 -0.1670609 0.060684774 w=5 h=5 s=n,
571 -0.16687286 0.06014741 w=5 h=5 s=n,
572 -0.1359707 -0.0054355026 w=5 h=5 s=n,
573 -0.13239148 -0.008457879 w=5 h=5 s=n,
574 -0.13400029 -0.011368769 w=5 h=5 s=n,
575 -0.13744129 -0.01594107 w=5 h=5 s=n,
576 -0.13888094 -0.017552046 w=5 h=5 s=n,
577 -0.13869698 -0.017884906 w=5 h=5 s=n,
578 -0.13829298 -0.020262629 w=5 h=5 s=n,
579 -0.1397472 -0.025310323 w=5 h=5 s=n,
580 -0.13999939 -0.026101537 w=5 h=5 s=n,
581 -0.13994206 -0.026220582 w=5 h=5 s=n,
582 -0.15838878 -0.025632454 w=5 h=5 s=n,
583 -0.15820481 -0.025965314 w=5 h=5 s=n,
584 -0.15780082 -0.028343039 w=5 h=5 s=n,
585 -0.15925504 -0.033390734 w=5 h=5 s=n,
586 -0.15950722 -0.03418195 w=5 h=5 s=n,
587 -0.15944989 -0.034300994 w=5 h=5 s=n,
588 -0.15698436 -0.033438265 w=5 h=5 s=n,
589 -0.12537196 -0.06896444 w=5 h=5 s=n,
590 -0.12496098 -0.0702539 w=5 h=5 s=n,
591 -0.1239542 -0.072891384 w=5 h=5 s=n,
592 -0.122514546 -0.07128041 w=5 h=5 s=n,
593 -0.11907353 -0.06670811 w=5 h=5 s=n,
594 -0.11882135 -0.065916896 w=5 h=5 s=n,
595 -0.116315834 -0.06354814 w=5 h=5 s=n,
596 -0.16208921 -0.027044985 w=5 h=5 s=n,
597 -0.16190526 -0.027377846 w=5 h=5 s=n,
598 -0.16150126 -0.02975557 w=5 h=5 s=n,
599 -0.16295548 -0.034803264 w=5 h=5 s=n,
600 -0.16320767 -0.03559448 w=5 h=5 s=n,
601 -0.16315033 -0.035713524 w=5 h=5 s=n,
602 -0.17003049 -0.030598478 w=5 h=5 s=n,
603 -0.16984652 -0.030931339 w=5 h=5 s=n,
604 -0.16944253 -0.03330906 w=5 h=5 s=n,
605 -0.17089675 -0.038356755 w=5 h=5 s=n,
606 -0.17114893 -0.03914797 w=5 h=5 s=n,
607 -0.1710916 -0.039267015 w=5 h=5 s=n,
608 -0.16739117 -0.037854485 w=5 h=5 s=n,
609 -0.16492563 -0.036991756 w=5 h=5 s=n,
610 -0.12441375 -0.075751804 w=5 h=5 s=n,
611 -0.12400276 -0.07704127 w=5 h=5 s=n,
612 -0.12299598 -0.07967876 w=5 h=5 s=n,
613 -0.12155633 -0.07806778 w=5 h=5 s=n,
614 -0.11811531 -0.07349548 w=5 h=5 s=n,
615 -0.12398666 -0.0771222 w=5 h=5 s=n,
616 -0.12297989 -0.07975968 w=5 h=5 s=n,
617 -0.121540226 -0.07814871 w=5 h=5 s=n,
618 -0.11809922 -0.073576406 w=5 h=5 s=n,
619 -0.11905744 -0.06678904 w=5 h=5 s=n,
620 -0.11880525 -0.065997824 w=5 h=5 s=n,
621 -0.11629974 -0.06362907 w=5 h=5 s=n,
622 -0.15856919 0.083739325 w=5 h=5 s=n,
623 -0.1618878 0.08766936 w=5 h=5 s=n,
624 -0.16648072 0.09252745 w=5 h=5 s=n,
625 -0.17005993 0.09554982 w=5 h=5 s=n,
626 -0.17086633 0.09645217 w=5 h=5 s=n,
627 -0.17109755 0.09528972 w=5 h=5 s=n,
628 -0.17127347 0.094737746 w=5 h=5 s=n,
629 -0.17130767 0.0944956 w=5 h=5 s=n,
630 -0.1716566 0.09035877 w=5 h=5 s=n,
631 -0.17167301 0.09026214 w=5 h=5 s=n,
632 -0.17550544 -0.03173953 w=5 h=5 s=n,
633 -0.18344672 -0.03529302 w=5 h=5 s=n,
634 -0.18326277 -0.035625882 w=5 h=5 s=n,
635 -0.18285877 -0.038003605 w=5 h=5 s=n,
636 -0.18431298 -0.0430513 w=5 h=5 s=n,
637 -0.18456517 -0.043842513 w=5 h=5 s=n,
638 -0.18450783 -0.04396156 w=5 h=5 s=n,
639 -0.1900167 -0.038014393 w=5 h=5 s=n,
640 -0.18983273 -0.03834725 w=5 h=5 s=n,
641 -0.18942875 -0.040724978 w=5 h=5 s=n,
642 -0.19088295 -0.04577267 w=5 h=5 s=n,
643 -0.19113514 -0.046563886 w=5 h=5 s=n,
644 -0.19107781 -0.04668293 w=5 h=5 s=n,
645 -0.17766157 -0.041988388 w=5 h=5 s=n,
646 -0.12416035 -0.0780008 w=5 h=5 s=n,
647 -0.12374936 -0.07929026 w=5 h=5 s=n,
648 -0.12373327 -0.079371184 w=5 h=5 s=n,
649 -0.122726485 -0.082008675 w=5 h=5 s=n,
650 -0.12128683 -0.080397695 w=5 h=5 s=n,
651 -0.11784582 -0.07582539 w=5 h=5 s=n,
652 -0.12261158 -0.082247265 w=5 h=5 s=n,
653 -0.12117193 -0.080636285 w=5 h=5 s=n,
654 -0.11773092 -0.07606399 w=5 h=5 s=n,
655 -0.11798432 -0.073814996 w=5 h=5 s=n,
656 -0.11894254 -0.06702763 w=5 h=5 s=n,
657 -0.11869036 -0.066236414 w=5 h=5 s=n,
658 -0.11618484 -0.06386766 w=5 h=5 s=n,
659 -0.11620094 -0.06378673 w=5 h=5 s=n,
660 -0.11937763 -0.045090087 w=5 h=5 s=n,
661 -0.11792341 -0.040042393 w=5 h=5 s=n,
662 -0.11631462 -0.0371315 w=5 h=5 s=n,
663 -0.11688561 -0.03426092 w=5 h=5 s=n,
664 -0.11749161 -0.03069426 w=5 h=5 s=n,
665 -0.11882401 -0.023995839 w=5 h=5 s=n,
666 -0.15990055 0.08671463 w=5 h=5 s=n,
667 -0.16321917 0.090644665 w=5 h=5 s=n,
668 -0.16781208 0.09550275 w=5 h=5 s=n,
669 -0.1713913 0.09852513 w=5 h=5 s=n,
670 -0.17219768 0.09942748 w=5 h=5 s=n,
671 -0.1724289 0.09826503 w=5 h=5 s=n,
672 -0.17260484 0.09771305 w=5 h=5 s=n,
673 -0.17263903 0.09747091 w=5 h=5 s=n,
674 -0.17298797 0.09333407 w=5 h=5 s=n,
675 -0.17300437 0.09323744 w=5 h=5 s=n,
676 -0.19264537 -0.042386726 w=5 h=5 s=n,
677 -0.19409959 -0.04743442 w=5 h=5 s=n,
678 -0.19435176 -0.048225634 w=5 h=5 s=n,
679 -0.19429444 -0.04834468 w=5 h=5 s=n,
680 -0.1808782 -0.043650135 w=5 h=5 s=n,
681 -0.17430823 -0.040928766 w=5 h=5 s=n,
682 -0.17060779 -0.039516233 w=5 h=5 s=n,
683 -0.16814226 -0.038653508 w=5 h=5 s=n,
684 -0.16048531 0.08792891 w=5 h=5 s=n,
685 -0.16380394 0.09185894 w=5 h=5 s=n,
686 -0.16839685 0.09671703 w=5 h=5 s=n,
687 -0.17197606 0.0997394 w=5 h=5 s=n,
688 -0.17278245 0.10064175 w=5 h=5 s=n,
689 -0.17301367 0.09947931 w=5 h=5 s=n,
690 -0.17318961 0.09892733 w=5 h=5 s=n,
691 -0.1732238 0.09868518 w=5 h=5 s=n,
692 -0.17357273 0.09454835 w=5 h=5 s=n,
693 -0.17358914 0.09445172 w=5 h=5 s=n,
694 -0.16398916 0.09219408 w=5 h=5 s=n,
695 -0.16858207 0.09705217 w=5 h=5 s=n,
696 -0.17216128 0.100074545 w=5 h=5 s=n,
697 -0.17296767 0.10097689 w=5 h=5 s=n,
698 -0.1731989 0.099814445 w=5 h=5 s=n,
699 -0.17337483 0.09926247 w=5 h=5 s=n,
700 -0.17340901 0.099020325 w=5 h=5 s=n,
701 -0.17375796 0.094883494 w=5 h=5 s=n,
702 -0.17377438 0.09478686 w=5 h=5 s=n,
703 -0.17318961 0.09357258 w=5 h=5 s=n,
704 -0.17185824 0.09059727 w=5 h=5 s=n,
705 -0.1933807 -0.039191507 w=5 h=5 s=n,
706 -0.19319673 -0.03952437 w=5 h=5 s=n,
707 -0.19279274 -0.04190209 w=5 h=5 s=n,
708 -0.19600937 -0.043563843 w=5 h=5 s=n,
709 -0.19746359 -0.048611537 w=5 h=5 s=n,
710 -0.19771577 -0.04940275 w=5 h=5 s=n,
711 -0.19765843 -0.049521796 w=5 h=5 s=n,
712 -0.121160485 -0.088869765 w=5 h=5 s=n,
713 -0.12104558 -0.089108355 w=5 h=5 s=n,
714 -0.11960593 -0.08749738 w=5 h=5 s=n,
715 -0.11616492 -0.08292508 w=5 h=5 s=n,
716 -0.116418324 -0.080676086 w=5 h=5 s=n,
717 -0.12003587 -0.09093529 w=5 h=5 s=n,
718 -0.11859622 -0.08932432 w=5 h=5 s=n,
719 -0.115155205 -0.084752016 w=5 h=5 s=n,
720 -0.11540861 -0.08250302 w=5 h=5 s=n,
721 -0.11697461 -0.07564193 w=5 h=5 s=n,
722 -0.11793283 -0.06885456 w=5 h=5 s=n,
723 -0.11768065 -0.06806335 w=5 h=5 s=n,
724 -0.11517513 -0.06569459 w=5 h=5 s=n,
725 -0.11519123 -0.06561367 w=5 h=5 s=n,
726 -0.11836792 -0.04691702 w=5 h=5 s=n,
727 -0.1169137 -0.041869327 w=5 h=5 s=n,
728 -0.1153049 -0.038958438 w=5 h=5 s=n,
729 -0.1158759 -0.036087856 w=5 h=5 s=n,
730 -0.1164819 -0.032521196 w=5 h=5 s=n,
731 -0.117814295 -0.025822775 w=5 h=5 s=n,
732 -0.030217765 0.0014882735 w=5 h=5 s=n,
733 -0.04370651 0.0011098159 w=5 h=5 s=n,
734 -0.05385885 0.0016799591 w=5 h=5 s=n,
735 -0.05800654 0.0015635863 w=5 h=5 s=n,
736 -0.059425827 0.001972476 w=5 h=5 s=n,
737 -0.059655473 0.0020248913 w=5 h=5 s=n,
738 -0.059560113 0.0024427 w=5 h=5 s=n,
739 -0.06023 0.0025759493 w=5 h=5 s=n,
740 -0.059889603 0.0042872354 w=5 h=5 s=n,
741 -0.089254305 9.786285E-4 w=5 h=5 s=n,
742 -0.093619645 9.786285E-4 w=5 h=5 s=n,
743 -0.09402364 0.0033563524 w=5 h=5 s=n,
744 -0.09380289 0.004919959 w=5 h=5 s=n,
745 -0.09709818 0.0043600667 w=5 h=5 s=n,
746 -0.106702015 0.0038207269 w=5 h=5 s=n,
747 -0.10675935 0.003939772 w=5 h=5 s=n,
748 -0.106742926 0.004036406 w=5 h=5 s=n,
749 -0.106566995 0.0045883846 w=5 h=5 s=n,
750 -0.10753173 0.0043681916 w=5 h=5 s=n,
751 -0.11051974 0.0035073608 w=5 h=5 s=n,
752 -0.11087113 0.0034476568 w=5 h=5 s=n,
753 -0.16109088 0.0892822 w=5 h=5 s=n,
754 -0.16440949 0.09321223 w=5 h=5 s=n,
755 -0.16459471 0.093547374 w=5 h=5 s=n,
756 -0.16918764 0.09840546 w=5 h=5 s=n,
757 -0.17276685 0.10142784 w=5 h=5 s=n,
758 -0.17357323 0.102330185 w=5 h=5 s=n,
759 -0.17380446 0.10116774 w=5 h=5 s=n,
760 -0.17398039 0.10061576 w=5 h=5 s=n,
761 -0.17401457 0.10037362 w=5 h=5 s=n,
762 -0.17436351 0.09623678 w=5 h=5 s=n,
763 -0.16632688 0.09690032 w=5 h=5 s=n,
764 -0.1709198 0.10175841 w=5 h=5 s=n,
765 -0.17449902 0.104780786 w=5 h=5 s=n,
766 -0.17530541 0.10568313 w=5 h=5 s=n,
767 -0.17553663 0.104520686 w=5 h=5 s=n,
768 -0.17571256 0.10396871 w=5 h=5 s=n,
769 -0.17574675 0.103726566 w=5 h=5 s=n,
770 -0.17609568 0.09958973 w=5 h=5 s=n,
771 -0.17549013 0.09823644 w=5 h=5 s=n,
772 -0.17550655 0.09813981 w=5 h=5 s=n,
773 -0.1771615 -0.032166712 w=5 h=5 s=n,
774 -0.18510278 -0.035720203 w=5 h=5 s=n,
775 -0.19167274 -0.038441576 w=5 h=5 s=n,
776 -0.19503675 -0.03961869 w=5 h=5 s=n,
777 -0.19485278 -0.03995155 w=5 h=5 s=n,
778 -0.1944488 -0.042329274 w=5 h=5 s=n,
779 -0.19766542 -0.043991026 w=5 h=5 s=n,
780 -0.19911964 -0.04903872 w=5 h=5 s=n,
781 -0.19937181 -0.049829934 w=5 h=5 s=n,
782 -0.19931449 -0.04994898 w=5 h=5 s=n,
783 -0.19677033 -0.040171232 w=5 h=5 s=n,
784 -0.19658636 -0.04050409 w=5 h=5 s=n,
785 -0.19618237 -0.042881813 w=5 h=5 s=n,
786 -0.199399 -0.044543564 w=5 h=5 s=n,
787 -0.20085321 -0.04959126 w=5 h=5 s=n,
788 -0.2011054 -0.050382473 w=5 h=5 s=n,
789 -0.20104806 -0.050501518 w=5 h=5 s=n,
790 -0.19939202 -0.050074335 w=5 h=5 s=n,
791 -0.1616085 0.09159569 w=5 h=5 s=n,
792 -0.16219327 0.09280996 w=5 h=5 s=n,
793 -0.16279882 0.094163254 w=5 h=5 s=n,
794 -0.16611744 0.098093286 w=5 h=5 s=n,
795 -0.16630267 0.09842843 w=5 h=5 s=n,
796 -0.16803484 0.101781376 w=5 h=5 s=n,
797 -0.17262776 0.10663946 w=5 h=5 s=n,
798 -0.17620698 0.10966184 w=5 h=5 s=n,
799 -0.17701337 0.11056419 w=5 h=5 s=n,
800 -0.17724459 0.10940174 w=5 h=5 s=n,
801 -0.17742051 0.108849764 w=5 h=5 s=n,
802 -0.1774547 0.10860762 w=5 h=5 s=n,
803 -0.18254787 0.11937231 w=5 h=5 s=n,
804 -0.1827791 0.11820986 w=5 h=5 s=n,
805 -0.18295503 0.117657885 w=5 h=5 s=n,
806 -0.18298921 0.11741574 w=5 h=5 s=n,
807 -0.18128125 0.11253469 w=5 h=5 s=n,
808 -0.1816302 0.10839786 w=5 h=5 s=n,
809 -0.18102464 0.10704456 w=5 h=5 s=n,
810 -0.18104106 0.10694793 w=5 h=5 s=n,
811 -0.17930888 0.10359498 w=5 h=5 s=n,
812 -0.17872411 0.1023807 w=5 h=5 s=n,
813 -0.17739275 0.0994054 w=5 h=5 s=n,
814 -0.17850111 -0.032472473 w=5 h=5 s=n,
815 -0.18644239 -0.036025964 w=5 h=5 s=n,
816 -0.19301237 -0.038747333 w=5 h=5 s=n,
817 -0.19637637 -0.03992445 w=5 h=5 s=n,
818 -0.19810994 -0.04047699 w=5 h=5 s=n,
819 -0.19792597 -0.04080985 w=5 h=5 s=n,
820 -0.19752198 -0.043187574 w=5 h=5 s=n,
821 -0.20073861 -0.04484932 w=5 h=5 s=n,
822 -0.20219283 -0.049897015 w=5 h=5 s=n,
823 -0.20244502 -0.05068823 w=5 h=5 s=n,
824 -0.20238768 -0.050807275 w=5 h=5 s=n,
825 -0.20084664 -0.04490903 w=5 h=5 s=n,
826 -0.20230086 -0.049956724 w=5 h=5 s=n,
827 -0.20255305 -0.05074794 w=5 h=5 s=n,
828 -0.20249571 -0.050866984 w=5 h=5 s=n,
829 -0.2011561 -0.050561227 w=5 h=5 s=n,
830 -0.19950005 -0.050134044 w=5 h=5 s=n,
831 -0.19776647 -0.049581505 w=5 h=5 s=n,
832 -0.19440247 -0.048404388 w=5 h=5 s=n,
833 -0.18098624 -0.043709844 w=5 h=5 s=n,
834 -0.12094058 -0.089361854 w=5 h=5 s=n,
835 -0.11993087 -0.09118879 w=5 h=5 s=n,
836 -0.11849122 -0.08957782 w=5 h=5 s=n,
837 -0.115050204 -0.085005514 w=5 h=5 s=n,
838 -0.115303606 -0.08275652 w=5 h=5 s=n,
839 -0.116869606 -0.07589543 w=5 h=5 s=n,
840 -0.117827825 -0.06910806 w=5 h=5 s=n,
841 -0.11757564 -0.06831685 w=5 h=5 s=n,
842 -0.11507013 -0.06594809 w=5 h=5 s=n,
843 -0.11508622 -0.06586717 w=5 h=5 s=n,
844 -0.11826291 -0.04717052 w=5 h=5 s=n,
845 -0.1168087 -0.042122826 w=5 h=5 s=n,
846 -0.1151999 -0.039211936 w=5 h=5 s=n,
847 -0.117979184 -0.090392716 w=5 h=5 s=n,
848 -0.11453817 -0.085820414 w=5 h=5 s=n,
849 -0.11479157 -0.08357142 w=5 h=5 s=n,
850 -0.11635757 -0.07671033 w=5 h=5 s=n,
851 -0.11731579 -0.06992296 w=5 h=5 s=n,
852 -0.117063604 -0.06913175 w=5 h=5 s=n,
853 -0.11455809 -0.06676299 w=5 h=5 s=n,
854 -0.11457419 -0.06668206 w=5 h=5 s=n,
855 -0.117750876 -0.04798542 w=5 h=5 s=n,
856 -0.116296664 -0.042937726 w=5 h=5 s=n,
857 -0.11468787 -0.040026832 w=5 h=5 s=n,
858 -0.11479287 -0.039773334 w=5 h=5 s=n,
859 -0.115363866 -0.036902755 w=5 h=5 s=n,
860 -0.11596987 -0.033336096 w=5 h=5 s=n,
861 -0.11730226 -0.026637673 w=5 h=5 s=n,
862 -0.18501036 0.123546846 w=5 h=5 s=n,
863 -0.1852416 0.1223844 w=5 h=5 s=n,
864 -0.18541752 0.121832415 w=5 h=5 s=n,
865 -0.1854517 0.12159027 w=5 h=5 s=n,
866 -0.18374376 0.116709225 w=5 h=5 s=n,
867 -0.18409269 0.11257239 w=5 h=5 s=n,
868 -0.18348713 0.11121909 w=5 h=5 s=n,
869 -0.18350355 0.11112246 w=5 h=5 s=n,
870 -0.18702313 0.12655917 w=5 h=5 s=n,
871 -0.18725437 0.12539673 w=5 h=5 s=n,
872 -0.18743029 0.124844745 w=5 h=5 s=n,
873 -0.18746448 0.1246026 w=5 h=5 s=n,
874 -0.18575653 0.119721554 w=5 h=5 s=n,
875 -0.18610546 0.115584716 w=5 h=5 s=n,
876 -0.1854999 0.11423142 w=5 h=5 s=n,
877 -0.18551633 0.11413479 w=5 h=5 s=n,
878 -0.18305384 0.10996026 w=5 h=5 s=n,
879 -0.18132165 0.10660731 w=5 h=5 s=n,
880 -0.18073688 0.10539303 w=5 h=5 s=n,
881 -0.17940553 0.10241773 w=5 h=5 s=n,
882 -0.2023013 -0.04554858 w=5 h=5 s=n,
883 -0.20240933 -0.045608286 w=5 h=5 s=n,
884 -0.20386355 -0.05065598 w=5 h=5 s=n,
885 -0.20411573 -0.051447194 w=5 h=5 s=n,
886 -0.2040584 -0.05156624 w=5 h=5 s=n,
887 -0.20271878 -0.051260483 w=5 h=5 s=n,
888 -0.20106274 -0.0508333 w=5 h=5 s=n,
889 -0.19932915 -0.05028076 w=5 h=5 s=n,
890 -0.12107595 -0.08946853 w=5 h=5 s=n,
891 -0.120961055 -0.08970712 w=5 h=5 s=n,
892 -0.120856054 -0.08996062 w=5 h=5 s=n,
893 -0.11984634 -0.091787554 w=5 h=5 s=n,
894 -0.11840668 -0.09017658 w=5 h=5 s=n,
895 -0.11789465 -0.090991475 w=5 h=5 s=n,
896 -0.114453636 -0.08641918 w=5 h=5 s=n,
897 -0.02760498 0.002241004 w=5 h=5 s=n,
898 -0.041093726 0.0018625464 w=5 h=5 s=n,
899 -0.051246066 0.0024326898 w=5 h=5 s=n,
900 -0.05539375 0.0023163168 w=5 h=5 s=n,
901 -0.05681304 0.0027252063 w=5 h=5 s=n,
902 -0.057042688 0.0027776218 w=5 h=5 s=n,
903 -0.056947324 0.0031954306 w=5 h=5 s=n,
904 -0.057617214 0.0033286798 w=5 h=5 s=n,
905 -0.05727682 0.005039966 w=5 h=5 s=n,
906 -0.08664152 0.001731359 w=5 h=5 s=n,
907 -0.09100686 0.001731359 w=5 h=5 s=n,
908 -0.091410846 0.0041090827 w=5 h=5 s=n,
909 -0.09119011 0.0056726895 w=5 h=5 s=n,
910 -0.094485395 0.005112797 w=5 h=5 s=n,
911 -0.10408923 0.0045734574 w=5 h=5 s=n,
912 -0.10414656 0.004692503 w=5 h=5 s=n,
913 -0.10413014 0.0047891364 w=5 h=5 s=n,
914 -0.10395421 0.0053411154 w=5 h=5 s=n,
915 -0.0565646 0.002828115 w=5 h=5 s=n,
916 -0.056794245 0.0028805304 w=5 h=5 s=n,
917 -0.05669888 0.0032983392 w=5 h=5 s=n,
918 -0.05736877 0.0034315882 w=5 h=5 s=n,
919 -0.057028376 0.0051428746 w=5 h=5 s=n,
920 -0.08639307 0.0018342675 w=5 h=5 s=n,
921 -0.09075841 0.0018342675 w=5 h=5 s=n,
922 -0.091162406 0.0042119916 w=5 h=5 s=n,
923 -0.09094166 0.0057755983 w=5 h=5 s=n,
924 -0.094236955 0.005215706 w=5 h=5 s=n,
925 -0.10384079 0.0046763658 w=5 h=5 s=n,
926 -0.103898115 0.004795411 w=5 h=5 s=n,
927 -0.1038817 0.004892045 w=5 h=5 s=n,
928 -0.103705764 0.0054440238 w=5 h=5 s=n,
929 -0.106318556 0.0046912935 w=5 h=5 s=n,
930 -0.10728328 0.0044711 w=5 h=5 s=n,
931 -0.11017479 0.019816559 w=5 h=5 s=n,
932 -0.11134248 0.022875596 w=5 h=5 s=n,
933 -0.11152645 0.023208454 w=5 h=5 s=n,
934 -0.11164504 0.023494769 w=5 h=5 s=n,
935 -0.11401317 0.029211944 w=5 h=5 s=n,
936 -0.11410106 0.02965378 w=5 h=5 s=n,
937 -0.11885319 0.03885241 w=5 h=5 s=n,
938 -0.11904122 0.039389774 w=5 h=5 s=n,
939 -0.12013055 0.044162437 w=5 h=5 s=n,
940 -0.1302896 0.04154188 w=5 h=5 s=n,
941 -0.13905853 0.061138526 w=5 h=5 s=n,
942 -0.18776213 0.12773527 w=5 h=5 s=n,
943 -0.18799335 0.12657282 w=5 h=5 s=n,
944 -0.18816929 0.12602085 w=5 h=5 s=n,
945 -0.18820347 0.1257787 w=5 h=5 s=n,
946 -0.18649551 0.12089764 w=5 h=5 s=n,
947 -0.18684445 0.11676081 w=5 h=5 s=n,
948 -0.1862389 0.11540752 w=5 h=5 s=n,
949 -0.1862553 0.115310885 w=5 h=5 s=n,
950 -0.20339395 -0.04600117 w=5 h=5 s=n,
951 -0.20350198 -0.046060875 w=5 h=5 s=n,
952 -0.20495619 -0.05110857 w=5 h=5 s=n,
953 -0.20520838 -0.051899783 w=5 h=5 s=n,
954 -0.20515105 -0.05201883 w=5 h=5 s=n,
955 -0.20381144 -0.05171307 w=5 h=5 s=n,
956 -0.20215538 -0.05128589 w=5 h=5 s=n,
957 -0.20438333 -0.04654798 w=5 h=5 s=n,
958 -0.20583753 -0.051595673 w=5 h=5 s=n,
959 -0.20608972 -0.052386887 w=5 h=5 s=n,
960 -0.2060324 -0.052505933 w=5 h=5 s=n,
961 -0.20469278 -0.052200172 w=5 h=5 s=n,
962 -0.20303673 -0.05177299 w=5 h=5 s=n,
963 -0.20194408 -0.0513204 w=5 h=5 s=n,
964 -0.2002105 -0.05076786 w=5 h=5 s=n,
965 -0.19864783 -0.050068606 w=5 h=5 s=n,
966 -0.19528382 -0.04889149 w=5 h=5 s=n,
967 -0.21254551 -0.05696752 w=5 h=5 s=n,
968 -0.21248819 -0.057086565 w=5 h=5 s=n,
969 -0.21114857 -0.056780804 w=5 h=5 s=n,
970 -0.20949252 -0.05635362 w=5 h=5 s=n,
971 -0.20839988 -0.055901032 w=5 h=5 s=n,
972 -0.2066663 -0.055348493 w=5 h=5 s=n,
973 -0.20510362 -0.054649238 w=5 h=5 s=n,
974 -0.20173961 -0.05347212 w=5 h=5 s=n,
975 -0.20085827 -0.05298502 w=5 h=5 s=n,
976 -0.18744203 -0.048290476 w=5 h=5 s=n,
977 -0.187334 -0.048230767 w=5 h=5 s=n,
978 -0.18076402 -0.045509394 w=5 h=5 s=n,
979 -0.17706358 -0.044096865 w=5 h=5 s=n,
980 -0.17459805 -0.04323414 w=5 h=5 s=n,
981 -0.056096934 0.0035676933 w=5 h=5 s=n,
982 -0.056766823 0.0037009425 w=5 h=5 s=n,
983 -0.05642643 0.005412229 w=5 h=5 s=n,
984 -0.085791126 0.0021036216 w=5 h=5 s=n,
985 -0.090156466 0.0021036216 w=5 h=5 s=n,
986 -0.09056046 0.0044813454 w=5 h=5 s=n,
987 -0.09033971 0.006044952 w=5 h=5 s=n,
988 -0.09363501 0.0054850597 w=5 h=5 s=n,
989 -0.10323884 0.00494572 w=5 h=5 s=n,
990 -0.10329617 0.0050647655 w=5 h=5 s=n,
991 -0.103279755 0.005161399 w=5 h=5 s=n,
992 -0.10310382 0.005713378 w=5 h=5 s=n,
993 -0.10571661 0.0049606473 w=5 h=5 s=n,
994 -0.10668133 0.0047404543 w=5 h=5 s=n,
995 -0.089926414 0.0501204 w=5 h=5 s=n,
996 -0.09109411 0.053179435 w=5 h=5 s=n,
997 -0.09127807 0.053512294 w=5 h=5 s=n,
998 -0.09139667 0.05379861 w=5 h=5 s=n,
999 -0.0937648 0.05951578 w=5 h=5 s=n,
1000 -0.093852684 0.05995762 w=5 h=5 s=n,
1001 -0.098604806 0.069156244 w=5 h=5 s=n,
1002 -0.09879284 0.06969361 w=5 h=5 s=n,
1003 -0.09988217 0.07446627 w=5 h=5 s=n,
1004 -0.1761361 0.11447985 w=5 h=5 s=n,
1005 -0.17971532 0.11750223 w=5 h=5 s=n,
1006 -0.18052171 0.118404575 w=5 h=5 s=n,
1007 -0.18605623 0.1272127 w=5 h=5 s=n,
1008 -0.18851872 0.13138723 w=5 h=5 s=n,
1009 -0.19053149 0.13439956 w=5 h=5 s=n,
1010 -0.19127047 0.13557565 w=5 h=5 s=n,
1011 -0.1915017 0.13441321 w=5 h=5 s=n,
1012 -0.19167763 0.13386123 w=5 h=5 s=n,
1013 -0.19171181 0.13361908 w=5 h=5 s=n,
1014 -0.20521088 -0.04669473 w=5 h=5 s=n,
1015 -0.20531891 -0.04675444 w=5 h=5 s=n,
1016 -0.20620026 -0.04724154 w=5 h=5 s=n,
1017 -0.20765448 -0.052289233 w=5 h=5 s=n,
1018 -0.20790666 -0.053080447 w=5 h=5 s=n,
1019 -0.21436246 -0.05766108 w=5 h=5 s=n,
1020 -0.21430512 -0.057780124 w=5 h=5 s=n,
1021 -0.2129655 -0.057474364 w=5 h=5 s=n,
1022 -0.124427915 -0.08117292 w=5 h=5 s=n,
1023 -0.124016926 -0.082462385 w=5 h=5 s=n,
1024 -0.12400083 -0.082543306 w=5 h=5 s=n,
1025 -0.12299405 -0.0851808 w=5 h=5 s=n,
1026 -0.12142805 -0.09204189 w=5 h=5 s=n,
1027 -0.121343516 -0.09264065 w=5 h=5 s=n,
1028 -0.12122862 -0.09287924 w=5 h=5 s=n,
1029 -0.12112362 -0.09313274 w=5 h=5 s=n,
1030 -0.1141834 -0.08629182 w=5 h=5 s=n,
1031 -0.114436805 -0.084042825 w=5 h=5 s=n,
1032 -0.116002806 -0.077181734 w=5 h=5 s=n,
1033 -0.11696102 -0.07039437 w=5 h=5 s=n,
1034 -0.11670884 -0.06960315 w=5 h=5 s=n,
1035 -0.11420333 -0.0672344 w=5 h=5 s=n,
1036 -0.11421942 -0.06715347 w=5 h=5 s=n,
1037 -0.11739611 -0.048456825 w=5 h=5 s=n,
1038 -0.11594189 -0.04340913 w=5 h=5 s=n,
1039 -0.1143331 -0.040498238 w=5 h=5 s=n,
1040 -0.1144381 -0.04024474 w=5 h=5 s=n,
1041 -0.1150091 -0.03737416 w=5 h=5 s=n,
1042 -0.1156151 -0.033807497 w=5 h=5 s=n,
1043 -0.116947494 -0.027109079 w=5 h=5 s=n,
1044 -0.026591152 0.0024724037 w=5 h=5 s=n,
1045 -0.040079895 0.0020939459 w=5 h=5 s=n,
1046 -0.05023224 0.0026640892 w=5 h=5 s=n,
1047 -0.054379925 0.0025477163 w=5 h=5 s=n,
1048 -0.055799212 0.002956606 w=5 h=5 s=n,
1049 -0.05555077 0.0030595146 w=5 h=5 s=n,
1050 -0.05578042 0.0031119299 w=5 h=5 s=n,
1051 -0.055685055 0.0035297386 w=5 h=5 s=n,
1052 -0.055083107 0.0037990927 w=5 h=5 s=n,
1053 -0.055752996 0.003932342 w=5 h=5 s=n,
1054 -0.0554126 0.0056436285 w=5 h=5 s=n,
1055 -0.0847773 0.0023350213 w=5 h=5 s=n,
1056 -0.089142635 0.0023350213 w=5 h=5 s=n,
1057 -0.08954663 0.004712745 w=5 h=5 s=n,
1058 -0.08932588 0.006276352 w=5 h=5 s=n,
1059 -0.051612865 0.0044374466 w=5 h=5 s=n,
1060 -0.051842514 0.004489862 w=5 h=5 s=n,
1061 -0.05174715 0.004907671 w=5 h=5 s=n,
1062 -0.051145203 0.0051770248 w=5 h=5 s=n,
1063 -0.051815093 0.005310274 w=5 h=5 s=n,
1064 -0.051474698 0.0070215603 w=5 h=5 s=n,
1065 -0.080839396 0.0037129533 w=5 h=5 s=n,
1066 -0.085204735 0.0037129533 w=5 h=5 s=n,
1067 -0.08560873 0.0060906773 w=5 h=5 s=n,
1068 -0.08538798 0.007654284 w=5 h=5 s=n,
1069 -0.08640181 0.0074228845 w=5 h=5 s=n,
1070 -0.0896971 0.006862992 w=5 h=5 s=n,
1071 -0.099300936 0.0063236523 w=5 h=5 s=n,
1072 -0.09935827 0.0064426973 w=5 h=5 s=n,
1073 -0.09934185 0.0065393313 w=5 h=5 s=n,
1074 -0.09916592 0.00709131 w=5 h=5 s=n,
1075 -0.08163552 0.06180531 w=5 h=5 s=n,
1076 -0.08280322 0.064864345 w=5 h=5 s=n,
1077 -0.08298718 0.06519721 w=5 h=5 s=n,
1078 -0.08310578 0.06548352 w=5 h=5 s=n,
1079 -0.08547391 0.0712007 w=5 h=5 s=n,
1080 -0.0855618 0.07164253 w=5 h=5 s=n,
1081 -0.07751678 0.068360254 w=5 h=5 s=n,
1082 -0.07868447 0.07141929 w=5 h=5 s=n,
1083 -0.07886844 0.07175215 w=5 h=5 s=n,
1084 -0.07898703 0.072038464 w=5 h=5 s=n,
1085 -0.08135516 0.07775564 w=5 h=5 s=n,
1086 -0.08144305 0.07819748 w=5 h=5 s=n,
1087 -0.08973394 0.06651256 w=5 h=5 s=n,
1088 -0.094486065 0.07571119 w=5 h=5 s=n,
1089 -0.094674096 0.07624856 w=5 h=5 s=n,
1090 -0.09576342 0.08102122 w=5 h=5 s=n,
1091 -0.1901737 0.13482384 w=5 h=5 s=n,
1092 -0.19218647 0.13783617 w=5 h=5 s=n,
1093 -0.19292547 0.13901226 w=5 h=5 s=n,
1094 -0.19315669 0.13784982 w=5 h=5 s=n,
1095 -0.19333261 0.13729784 w=5 h=5 s=n,
1096 -0.1933668 0.1370557 w=5 h=5 s=n,
1097 -0.17998087 -0.0326392 w=5 h=5 s=n,
1098 -0.18792215 -0.036192693 w=5 h=5 s=n,
1099 -0.19449212 -0.038914062 w=5 h=5 s=n,
1100 -0.19785613 -0.04009118 w=5 h=5 s=n,
1101 -0.1995897 -0.040643718 w=5 h=5 s=n,
1102 -0.19940573 -0.040976577 w=5 h=5 s=n,
1103 -0.19900174 -0.043354303 w=5 h=5 s=n,
1104 -0.20221837 -0.04501605 w=5 h=5 s=n,
1105 -0.20378105 -0.045715306 w=5 h=5 s=n,
1106 -0.20487371 -0.0461679 w=5 h=5 s=n,
1107 -0.20669064 -0.04686146 w=5 h=5 s=n,
1108 -0.20679867 -0.046921168 w=5 h=5 s=n,
1109 -0.20768002 -0.047408268 w=5 h=5 s=n,
1110 -0.20773552 -0.047434997 w=5 h=5 s=n,
1111 -0.20625576 -0.047268268 w=5 h=5 s=n,
1112 -0.20770998 -0.05231596 w=5 h=5 s=n,
1113 -0.20796216 -0.053107176 w=5 h=5 s=n,
1114 -0.21441795 -0.057687808 w=5 h=5 s=n,
1115 -0.21436062 -0.057806853 w=5 h=5 s=n,
1116 -0.21302101 -0.057501093 w=5 h=5 s=n,
1117 -0.21120407 -0.056807533 w=5 h=5 s=n,
1118 -0.20954803 -0.05638035 w=5 h=5 s=n,
1119 -0.11628679 -0.09390068 w=5 h=5 s=n,
1120 -0.11284578 -0.08932838 w=5 h=5 s=n,
1121 -0.11293031 -0.08872961 w=5 h=5 s=n,
1122 -0.112575546 -0.08920102 w=5 h=5 s=n,
1123 -0.11282894 -0.08695203 w=5 h=5 s=n,
1124 -0.11439494 -0.08009094 w=5 h=5 s=n,
1125 -0.11535316 -0.073303565 w=5 h=5 s=n,
1126 -0.11510098 -0.07251235 w=5 h=5 s=n,
1127 -0.11259546 -0.070143595 w=5 h=5 s=n,
1128 -0.11261156 -0.070062675 w=5 h=5 s=n,
1129 -0.11578825 -0.051366027 w=5 h=5 s=n,
1130 -0.11433403 -0.046318334 w=5 h=5 s=n,
1131 -0.11272524 -0.04340744 w=5 h=5 s=n,
1132 -0.109680586 -0.006577325 w=5 h=5 s=n,
1133 -0.1090107 -0.0067105745 w=5 h=5 s=n,
1134 -0.10878105 -0.00676299 w=5 h=5 s=n,
1135 -0.04342821 0.0070461314 w=5 h=5 s=n,
1136 -0.043657854 0.007098547 w=5 h=5 s=n,
1137 -0.043562494 0.0075163557 w=5 h=5 s=n,
1138 -0.042960547 0.00778571 w=5 h=5 s=n,
1139 -0.043630436 0.0079189595 w=5 h=5 s=n,
1140 -0.043290038 0.009630245 w=5 h=5 s=n,
1141 -0.07265474 0.0063216384 w=5 h=5 s=n,
1142 -0.07702008 0.0063216384 w=5 h=5 s=n,
1143 -0.07742407 0.008699362 w=5 h=5 s=n,
1144 -0.077203326 0.010262969 w=5 h=5 s=n,
1145 -0.07821715 0.01003157 w=5 h=5 s=n,
1146 -0.08151244 0.009471677 w=5 h=5 s=n,
1147 -0.09111628 0.008932337 w=5 h=5 s=n,
1148 -0.07686133 0.07494832 w=5 h=5 s=n,
1149 -0.0770453 0.07528118 w=5 h=5 s=n,
1150 -0.07716389 0.0755675 w=5 h=5 s=n,
1151 -0.07953203 0.08128467 w=5 h=5 s=n,
1152 -0.079619914 0.08172651 w=5 h=5 s=n,
1153 -0.0879108 0.07004159 w=5 h=5 s=n,
1154 -0.09266292 0.07924022 w=5 h=5 s=n,
1155 -0.09285095 0.07977759 w=5 h=5 s=n,
1156 -0.09394029 0.08455025 w=5 h=5 s=n,
1157 -0.09805903 0.07799531 w=5 h=5 s=n,
1158 -0.118307404 0.04769147 w=5 h=5 s=n,
1159 -0.12846646 0.045070913 w=5 h=5 s=n,
1160 -0.13723539 0.06466756 w=5 h=5 s=n,
1161 -0.1433906 0.062346317 w=5 h=5 s=n,
1162 -0.19120872 0.13713688 w=5 h=5 s=n,
1163 -0.1932215 0.1401492 w=5 h=5 s=n,
1164 -0.19396047 0.1413253 w=5 h=5 s=n,
1165 -0.1941917 0.14016286 w=5 h=5 s=n,
1166 -0.19436763 0.13961087 w=5 h=5 s=n,
1167 -0.19696438 0.14431246 w=5 h=5 s=n,
1168 -0.1971403 0.14376047 w=5 h=5 s=n,
1169 -0.1961053 0.14144744 w=5 h=5 s=n,
1170 -0.19613948 0.1412053 w=5 h=5 s=n,
1171 -0.19448449 0.13776869 w=5 h=5 s=n,
1172 -0.19097614 0.1299283 w=5 h=5 s=n,
1173 -0.18926819 0.12504725 w=5 h=5 s=n,
1174 -0.18961713 0.12091041 w=5 h=5 s=n,
1175 -0.13973211 -0.034198914 w=5 h=5 s=n,
1176 -0.13942899 -0.0359829 w=5 h=5 s=n,
1177 -0.1380966 -0.04268132 w=5 h=5 s=n,
1178 -0.1374906 -0.04624798 w=5 h=5 s=n,
1179 -0.13590585 -0.052391555 w=5 h=5 s=n,
1180 -0.020079292 0.0035788128 w=5 h=5 s=n,
1181 -0.03356804 0.0032003552 w=5 h=5 s=n,
1182 -0.04372038 0.0037704986 w=5 h=5 s=n,
1183 -0.047868066 0.0036541256 w=5 h=5 s=n,
1184 -0.049287353 0.0040630153 w=5 h=5 s=n,
1185 -0.04903891 0.0041659237 w=5 h=5 s=n,
1186 -0.045101006 0.005543856 w=5 h=5 s=n,
1187 -0.03691635 0.008152541 w=5 h=5 s=n,
1188 -0.037146 0.008204957 w=5 h=5 s=n,
1189 -0.037050635 0.008622766 w=5 h=5 s=n,
1190 -0.036448687 0.008892119 w=5 h=5 s=n,
1191 -0.037118576 0.009025369 w=5 h=5 s=n,
1192 -0.03677818 0.0107366545 w=5 h=5 s=n,
1193 -0.07543157 0.07129908 w=5 h=5 s=n,
1194 -0.07659926 0.07435811 w=5 h=5 s=n,
1195 -0.07477613 0.07788715 w=5 h=5 s=n,
1196 -0.07496009 0.07822001 w=5 h=5 s=n,
1197 -0.07507869 0.07850632 w=5 h=5 s=n,
1198 -0.13660727 0.067419544 w=5 h=5 s=n,
1199 -0.1384304 0.06389052 w=5 h=5 s=n,
1200 -0.14183357 0.05847441 w=5 h=5 s=n,
1201 -0.14308457 0.06281675 w=5 h=5 s=n,
1202 -0.14276248 0.06509831 w=5 h=5 s=n,
1203 -0.14245269 0.07061448 w=5 h=5 s=n,
1204 -0.14308082 0.067862496 w=5 h=5 s=n,
1205 -0.14340292 0.065580934 w=5 h=5 s=n,
1206 -0.15299864 0.0783314 w=5 h=5 s=n,
1207 -0.1582594 0.089255504 w=5 h=5 s=n,
1208 -0.15959077 0.09223081 w=5 h=5 s=n,
1209 -0.16129872 0.097111866 w=5 h=5 s=n,
1210 -0.21953523 0.08968632 w=5 h=5 s=n,
1211 -0.21934721 0.08914895 w=5 h=5 s=n,
1212 -0.14482011 0.01453396 w=5 h=5 s=n,
1213 -0.1402272 0.009675872 w=5 h=5 s=n,
1214 -0.1401086 0.009389559 w=5 h=5 s=n,
1215 -0.13535647 1.909298E-4 w=5 h=5 s=n,
1216 -0.13418879 -0.002868106 w=5 h=5 s=n,
1217 -0.13706848 -0.003967345 w=5 h=5 s=n,
1218 -0.13953401 -0.0048300717 w=5 h=5 s=n,
1219 -0.1359548 -0.007852447 w=5 h=5 s=n,
1220 -0.13756359 -0.010763339 w=5 h=5 s=n,
1221 -0.1410046 -0.01533564 w=5 h=5 s=n,
1222 -0.14244425 -0.016946614 w=5 h=5 s=n,
1223 -0.1619521 -0.025027024 w=5 h=5 s=n,
1224 -0.16565253 -0.026439555 w=5 h=5 s=n,
1225 -0.17906876 -0.031134099 w=5 h=5 s=n,
1226 -0.18072481 -0.03156128 w=5 h=5 s=n,
1227 -0.18206443 -0.031867042 w=5 h=5 s=n,
1228 -0.18354419 -0.032033768 w=5 h=5 s=n,
1229 -0.21257716 -0.04944047 w=5 h=5 s=n,
1230 -0.2110974 -0.04927374 w=5 h=5 s=n,
1231 -0.21255162 -0.054321434 w=5 h=5 s=n,
1232 -0.2128038 -0.05511265 w=5 h=5 s=n,
1233 -0.2192596 -0.05969328 w=5 h=5 s=n,
1234 -0.21920227 -0.059812326 w=5 h=5 s=n,
1235 -0.21314146 -0.059591632 w=5 h=5 s=n,
1236 -0.21308595 -0.059564907 w=5 h=5 s=n,
1237 -0.2119933 -0.059112314 w=5 h=5 s=n,
1238 -0.21025972 -0.058559775 w=5 h=5 s=n,
1239 -0.20869704 -0.05786052 w=5 h=5 s=n,
1240 -0.20533304 -0.056683403 w=5 h=5 s=n,
1241 -0.2044517 -0.056196302 w=5 h=5 s=n,
1242 -0.19103546 -0.05150176 w=5 h=5 s=n,
1243 -0.19092743 -0.05144205 w=5 h=5 s=n,
1244 -0.18435745 -0.04872068 w=5 h=5 s=n,
1245 -0.18065701 -0.047308147 w=5 h=5 s=n,
1246 -0.17819148 -0.046445422 w=5 h=5 s=n,
1247 -0.13976505 -0.032483816 w=5 h=5 s=n,
1248 -0.14490034 -0.042424113 w=5 h=5 s=n,
1249 -0.14459723 -0.0442081 w=5 h=5 s=n,
1250 -0.1247984 -0.08335343 w=5 h=5 s=n,
1251 -0.12438741 -0.0846429 w=5 h=5 s=n,
1252 -0.12437131 -0.08472382 w=5 h=5 s=n,
1253 -0.12336453 -0.087361306 w=5 h=5 s=n,
1254 -0.12179854 -0.0942224 w=5 h=5 s=n,
1255 -0.121714 -0.09482116 w=5 h=5 s=n,
1256 -0.121321045 -0.10181837 w=5 h=5 s=n,
1257 -0.120950565 -0.09963786 w=5 h=5 s=n,
1258 -0.12083566 -0.09987645 w=5 h=5 s=n,
1259 -0.12073066 -0.10012995 w=5 h=5 s=n,
1260 -0.120463096 -0.096957825 w=5 h=5 s=n,
1261 -0.119453385 -0.09878476 w=5 h=5 s=n,
1262 -0.111798234 -0.09029653 w=5 h=5 s=n,
1263 -0.112051636 -0.08804754 w=5 h=5 s=n,
1264 -0.113617636 -0.08118644 w=5 h=5 s=n,
1265 -0.114575855 -0.07439908 w=5 h=5 s=n,
1266 -0.11432367 -0.07360786 w=5 h=5 s=n,
1267 -0.11181816 -0.07123911 w=5 h=5 s=n,
1268 -0.11183425 -0.071158186 w=5 h=5 s=n,
1269 -0.11501094 -0.05246154 w=5 h=5 s=n,
1270 -0.11355673 -0.047413845 w=5 h=5 s=n,
1271 -0.11194793 -0.04450295 w=5 h=5 s=n,
1272 -0.1135558 -0.04159375 w=5 h=5 s=n,
1273 -0.1136608 -0.04134025 w=5 h=5 s=n,
1274 -0.11423179 -0.03846967 w=5 h=5 s=n,
1275 -0.11267545 -0.03615179 w=5 h=5 s=n,
1276 -0.114007846 -0.029453369 w=5 h=5 s=n,
1277 -0.11436262 -0.028981963 w=5 h=5 s=n,
1278 -0.11487465 -0.028167065 w=5 h=5 s=n,
1279 -0.11588436 -0.026340129 w=5 h=5 s=n,
1280 -0.11599926 -0.026101539 w=5 h=5 s=n,
1281 -0.11700604 -0.023464054 w=5 h=5 s=n,
1282 -0.11741703 -0.022174586 w=5 h=5 s=n,
1283 -0.11867063 -0.017823271 w=5 h=5 s=n,
1284 -0.12025538 -0.011679696 w=5 h=5 s=n,
1285 -0.120558485 -0.00989571 w=5 h=5 s=n,
1286 -0.11039944 -0.007275156 w=5 h=5 s=n,
1287 -0.10898015 -0.007684046 w=5 h=5 s=n,
1288 -0.10674094 -0.008921616 w=5 h=5 s=n,
1289 -0.10607105 -0.009054865 w=5 h=5 s=n,
1290 -0.105841406 -0.0091072805 w=5 h=5 s=n,
1291 -0.0863591 0.020034509 w=5 h=5 s=n,
1292 -0.086961046 0.019765154 w=5 h=5 s=n,
1293 -0.087209485 0.019662246 w=5 h=5 s=n,
1294 -0.090197496 0.018801415 w=5 h=5 s=n,
1295 -0.09054889 0.01874171 w=5 h=5 s=n,
1296 -0.09302664 0.017795904 w=5 h=5 s=n,
1297 -0.092992455 0.018038047 w=5 h=5 s=n,
1298 -0.07846251 0.06556291 w=5 h=5 s=n,
1299 -0.07434377 0.07211785 w=5 h=5 s=n,
1300 -0.07225856 0.07505668 w=5 h=5 s=n,
1301 -0.073426254 0.07811572 w=5 h=5 s=n,
1302 -0.07160312 0.08164474 w=5 h=5 s=n,
1303 -0.13384044 0.07814567 w=5 h=5 s=n,
1304 -0.13566357 0.07461664 w=5 h=5 s=n,
1305 -0.13906674 0.06920053 w=5 h=5 s=n,
1306 -0.14031775 0.07354287 w=5 h=5 s=n,
1307 -0.13999565 0.07582443 w=5 h=5 s=n,
1308 -0.13968585 0.0813406 w=5 h=5 s=n,
1309 -0.14239854 0.07254458 w=5 h=5 s=n,
1310 -0.14302666 0.06979259 w=5 h=5 s=n,
1311 -0.14334877 0.06751104 w=5 h=5 s=n,
1312 -0.15294448 0.080261506 w=5 h=5 s=n,
1313 -0.15820526 0.09118561 w=5 h=5 s=n,
1314 -0.15953662 0.094160914 w=5 h=5 s=n,
1315 -0.16124457 0.09904196 w=5 h=5 s=n,
1316 -0.14306214 0.07105736 w=5 h=5 s=n,
1317 -0.14338425 0.068775795 w=5 h=5 s=n,
1318 -0.15297997 0.081526265 w=5 h=5 s=n,
1319 -0.15824074 0.092450365 w=5 h=5 s=n,
1320 -0.1595721 0.09542567 w=5 h=5 s=n,
1321 -0.16128005 0.10030673 w=5 h=5 s=n,
1322 -0.1613342 0.098376624 w=5 h=5 s=n,
1323 -0.16164398 0.092860445 w=5 h=5 s=n,
1324 -0.16222875 0.094074726 w=5 h=5 s=n,
1325 -0.16283432 0.09542801 w=5 h=5 s=n,
1326 -0.14492308 0.09311964 w=5 h=5 s=n,
1327 -0.14524518 0.09083808 w=5 h=5 s=n,
1328 -0.1548409 0.10358856 w=5 h=5 s=n,
1329 -0.16010167 0.11451265 w=5 h=5 s=n,
1330 -0.16143303 0.11748796 w=5 h=5 s=n,
1331 -0.16314098 0.122369014 w=5 h=5 s=n,
1332 -0.16319513 0.12043891 w=5 h=5 s=n,
1333 -0.16350493 0.11492273 w=5 h=5 s=n,
1334 -0.16408968 0.11613701 w=5 h=5 s=n,
1335 -0.16469525 0.11749031 w=5 h=5 s=n,
1336 -0.16465975 0.11622554 w=5 h=5 s=n,
1337 -0.16797838 0.12015557 w=5 h=5 s=n,
1338 -0.1681636 0.120490715 w=5 h=5 s=n,
1339 -0.16989577 0.12384366 w=5 h=5 s=n,
1340 -0.1656466 0.12227306 w=5 h=5 s=n,
1341 -0.1656111 0.1210083 w=5 h=5 s=n,
1342 -0.16892973 0.12493833 w=5 h=5 s=n,
1343 -0.16911495 0.12527347 w=5 h=5 s=n,
1344 -0.17084712 0.12862642 w=5 h=5 s=n,
1345 -0.16898619 0.10656413 w=5 h=5 s=n,
1346 -0.17357911 0.11142222 w=5 h=5 s=n,
1347 -0.17708746 0.119262606 w=5 h=5 s=n,
1348 -0.18066667 0.12228498 w=5 h=5 s=n,
1349 -0.18147306 0.123187326 w=5 h=5 s=n,
1350 -0.18700756 0.13199545 w=5 h=5 s=n,
1351 -0.18947007 0.13616998 w=5 h=5 s=n,
1352 -0.19112505 0.1396066 w=5 h=5 s=n,
1353 -0.19216006 0.14191963 w=5 h=5 s=n,
1354 -0.17817925 0.12268807 w=5 h=5 s=n,
1355 -0.18175846 0.12571044 w=5 h=5 s=n,
1356 -0.18256485 0.1266128 w=5 h=5 s=n,
1357 -0.18809935 0.13542092 w=5 h=5 s=n,
1358 -0.19056186 0.13959545 w=5 h=5 s=n,
1359 -0.19221684 0.14303206 w=5 h=5 s=n,
1360 -0.19325185 0.14534509 w=5 h=5 s=n,
1361 -0.19230051 0.14056234 w=5 h=5 s=n,
1362 -0.19431329 0.14357467 w=5 h=5 s=n,
1363 -0.19505227 0.14475076 w=5 h=5 s=n,
1364 -0.20760062 0.16234352 w=5 h=5 s=n,
1365 -0.20777656 0.16179153 w=5 h=5 s=n,
1366 -0.20674154 0.15947852 w=5 h=5 s=n,
1367 -0.20677574 0.15923637 w=5 h=5 s=n,
1368 -0.20892552 0.16178222 w=5 h=5 s=n,
1369 -0.19828926 0.14375114 w=5 h=5 s=n,
1370 -0.19663428 0.14031453 w=5 h=5 s=n,
1371 -0.19312592 0.13247415 w=5 h=5 s=n,
1372 -0.19141796 0.1275931 w=5 h=5 s=n,
1373 -0.1917669 0.12345626 w=5 h=5 s=n,
1374 -0.18899423 0.11930666 w=5 h=5 s=n,
1375 -0.18838868 0.11795337 w=5 h=5 s=n,
1376 -0.1884051 0.11785673 w=5 h=5 s=n,
1377 -0.23102008 0.16497569 w=5 h=5 s=n,
1378 -0.2282474 0.16082609 w=5 h=5 s=n,
1379 -0.22764184 0.1594728 w=5 h=5 s=n,
1380 -0.22765826 0.15937616 w=5 h=5 s=n,
1381 -0.22550848 0.15683031 w=5 h=5 s=n,
1382 -0.22476949 0.15565422 w=5 h=5 s=n,
1383 -0.222307 0.15147969 w=5 h=5 s=n,
1384 -0.22057483 0.14812674 w=5 h=5 s=n,
1385 -0.21999006 0.14691246 w=5 h=5 s=n,
1386 -0.2186587 0.14393716 w=5 h=5 s=n,
1387 -0.22688174 0.15012564 w=5 h=5 s=n,
1388 -0.18762858 0.10860621 w=5 h=5 s=n,
1389 -0.18561581 0.10559388 w=5 h=5 s=n,
1390 -0.1800813 0.096785754 w=5 h=5 s=n,
1391 -0.17989607 0.09645062 w=5 h=5 s=n,
1392 -0.1746353 0.08552652 w=5 h=5 s=n,
1393 -0.1733843 0.08118418 w=5 h=5 s=n,
1394 -0.17229497 0.07641152 w=5 h=5 s=n,
1395 -0.17220709 0.07596968 w=5 h=5 s=n,
1396 -0.17212193 0.07293472 w=5 h=5 s=n,
1397 -0.17234267 0.07137111 w=5 h=5 s=n,
1398 -0.17268308 0.06965982 w=5 h=5 s=n,
1399 -0.17277843 0.06924201 w=5 h=5 s=n,
1400 -0.17528394 0.06687326 w=5 h=5 s=n,
1401 -0.22775829 0.0958748 w=5 h=5 s=n,
1402 -0.14587393 -0.044308677 w=5 h=5 s=n,
1403 -0.14557081 -0.046092663 w=5 h=5 s=n,
1404 -0.14040259 -0.037867464 w=5 h=5 s=n,
1405 -0.13907018 -0.044565883 w=5 h=5 s=n,
1406 -0.13846418 -0.048132543 w=5 h=5 s=n,
1407 -0.14666083 -0.04894822 w=5 h=5 s=n,
1408 -0.1414926 -0.040723022 w=5 h=5 s=n,
1409 -0.1401602 -0.047421444 w=5 h=5 s=n,
1410 -0.1395542 -0.050988104 w=5 h=5 s=n,
1411 -0.13858062 -0.04910354 w=5 h=5 s=n,
1412 -0.13699587 -0.055247117 w=5 h=5 s=n,
1413 -0.13186058 -0.045306817 w=5 h=5 s=n,
1414 -0.13146327 -0.04590145 w=5 h=5 s=n,
1415 -0.13020967 -0.050252765 w=5 h=5 s=n,
1416 -0.12963869 -0.053123347 w=5 h=5 s=n,
1417 -0.126462 -0.07181999 w=5 h=5 s=n,
1418 -0.12550378 -0.078607365 w=5 h=5 s=n,
1419 -0.12525037 -0.08085635 w=5 h=5 s=n,
1420 -0.12551793 -0.084028475 w=5 h=5 s=n,
1421 -0.12588842 -0.08620899 w=5 h=5 s=n,
1422 -0.12500477 -0.0922338 w=5 h=5 s=n,
1423 -0.123997994 -0.09487128 w=5 h=5 s=n,
1424 -0.12243199 -0.10173237 w=5 h=5 s=n,
1425 -0.12234746 -0.10233114 w=5 h=5 s=n,
1426 -0.12195451 -0.109328344 w=5 h=5 s=n,
1427 -0.12158402 -0.10714783 w=5 h=5 s=n,
1428 -0.12241315 -0.104672335 w=5 h=5 s=n,
1429 -0.12202019 -0.11166955 w=5 h=5 s=n,
1430 -0.12164971 -0.10948903 w=5 h=5 s=n,
1431 -0.12101625 -0.101979055 w=5 h=5 s=n,
1432 -0.12090135 -0.102217644 w=5 h=5 s=n,
1433 -0.12035009 -0.12489662 w=5 h=5 s=n,
1434 -0.11971664 -0.11738665 w=5 h=5 s=n,
1435 -0.119601734 -0.11762524 w=5 h=5 s=n,
1436 -0.11953605 -0.11528404 w=5 h=5 s=n,
1437 -0.11943105 -0.11553754 w=5 h=5 s=n,
1438 -0.11916348 -0.11236542 w=5 h=5 s=n,
1439 -0.118153766 -0.11419235 w=5 h=5 s=n,
1440 -0.110883854 -0.045628466 w=5 h=5 s=n,
1441 -0.11249171 -0.04271926 w=5 h=5 s=n,
1442 -0.11259672 -0.04246576 w=5 h=5 s=n,
1443 -0.11316771 -0.039595183 w=5 h=5 s=n,
1444 -0.11394502 -0.038499672 w=5 h=5 s=n,
1445 -0.114551015 -0.034933012 w=5 h=5 s=n,
1446 -0.11161137 -0.0372773 w=5 h=5 s=n,
1447 -0.11294377 -0.030578882 w=5 h=5 s=n,
1448 -0.11237159 -0.031009486 w=5 h=5 s=n,
1449 -0.11343567 -0.029883975 w=5 h=5 s=n,
1450 -0.113790445 -0.02941257 w=5 h=5 s=n,
1451 -0.11430248 -0.028597672 w=5 h=5 s=n,
1452 -0.11531219 -0.026770735 w=5 h=5 s=n,
1453 -0.11542709 -0.026532143 w=5 h=5 s=n,
1454 -0.11643387 -0.02389466 w=5 h=5 s=n,
1455 -0.11684486 -0.022605192 w=5 h=5 s=n,
1456 -0.11809845 -0.018253876 w=5 h=5 s=n,
1457 -0.119683206 -0.012110301 w=5 h=5 s=n,
1458 -0.11998632 -0.010326316 w=5 h=5 s=n,
1459 -0.109827265 -0.0077057616 w=5 h=5 s=n,
1460 -0.10840798 -0.008114652 w=5 h=5 s=n,
1461 -0.10616876 -0.009352221 w=5 h=5 s=n,
1462 -0.10549887 -0.00948547 w=5 h=5 s=n,
1463 -0.10526923 -0.009537886 w=5 h=5 s=n,
1464 -0.103195876 -0.010760925 w=5 h=5 s=n,
1465 -0.10376805 -0.010330319 w=5 h=5 s=n,
1466 -0.1067077 -0.007986029 w=5 h=5 s=n,
1467 -0.10486026 -0.008812702 w=5 h=5 s=n,
1468 -0.106933616 -0.0075896634 w=5 h=5 s=n,
1469 -0.07581739 -0.009080125 w=5 h=5 s=n,
1470 -0.06566505 -0.009650269 w=5 h=5 s=n,
1471 -0.059233822 -0.010192736 w=5 h=5 s=n,
1472 -0.03541311 0.0051819603 w=5 h=5 s=n,
1473 -0.0395608 0.005065588 w=5 h=5 s=n,
1474 -0.040980086 0.005474477 w=5 h=5 s=n,
1475 -0.040731642 0.005577386 w=5 h=5 s=n,
1476 -0.03679374 0.0069553177 w=5 h=5 s=n,
1477 -0.02860908 0.009564003 w=5 h=5 s=n,
1478 -0.028838728 0.009616419 w=5 h=5 s=n,
1479 -0.028743366 0.010034227 w=5 h=5 s=n,
1480 -0.028141417 0.010303581 w=5 h=5 s=n,
1481 -0.005296395 0.014884971 w=5 h=5 s=n,
1482 -0.0055260425 0.014937387 w=5 h=5 s=n,
1483 -0.0054306802 0.015355195 w=5 h=5 s=n,
1484 -0.004828733 0.015624549 w=5 h=5 s=n,
1485 -0.013136003 0.014213087 w=5 h=5 s=n,
1486 -0.013805891 0.014346337 w=5 h=5 s=n,
1487 -0.013465496 0.016057624 w=5 h=5 s=n,
1488 -0.011902552 0.01660452 w=5 h=5 s=n,
1489 -0.035215236 0.011283552 w=5 h=5 s=n,
1490 -0.041727096 0.010177143 w=5 h=5 s=n,
1491 -0.07109179 0.006868536 w=5 h=5 s=n,
1492 -0.07545713 0.006868536 w=5 h=5 s=n,
1493 -0.075861126 0.00924626 w=5 h=5 s=n,
1494 -0.07564038 0.010809867 w=5 h=5 s=n,
1495 -0.07561704 0.010821108 w=5 h=5 s=n,
1496 -0.07717998 0.01027421 w=5 h=5 s=n,
1497 -0.078193806 0.010042811 w=5 h=5 s=n,
1498 -0.0814891 0.009482918 w=5 h=5 s=n,
1499 -0.09109294 0.008943578 w=5 h=5 s=n,
1500 -0.09927759 0.0063348934 w=5 h=5 s=n,
1501 -0.099334925 0.006453939 w=5 h=5 s=n,
1502 -0.099318504 0.006550573 w=5 h=5 s=n,
1503 -0.099142574 0.0071025514 w=5 h=5 s=n,
1504 -0.08158785 0.018132914 w=5 h=5 s=n,
1505 -0.08161119 0.018121673 w=5 h=5 s=n,
1506 -0.0855491 0.01674374 w=5 h=5 s=n,
1507 -0.088161886 0.01599101 w=5 h=5 s=n,
1508 -0.08912661 0.015770817 w=5 h=5 s=n,
1509 -0.068804376 0.03106487 w=5 h=5 s=n,
1510 -0.07151781 0.07333404 w=5 h=5 s=n,
1511 -0.06739906 0.079888985 w=5 h=5 s=n,
1512 -0.06531385 0.08282781 w=5 h=5 s=n,
1513 -0.07501763 0.07863311 w=5 h=5 s=n,
1514 -0.07710284 0.07569428 w=5 h=5 s=n,
1515 -0.07947097 0.08141146 w=5 h=5 s=n,
1516 -0.07955886 0.08185329 w=5 h=5 s=n,
1517 -0.08784974 0.070168376 w=5 h=5 s=n,
1518 -0.092601866 0.079367004 w=5 h=5 s=n,
1519 -0.0927899 0.07990437 w=5 h=5 s=n,
1520 -0.09387923 0.08467703 w=5 h=5 s=n,
1521 -0.11594506 0.14026187 w=5 h=5 s=n,
1522 -0.117768206 0.13673285 w=5 h=5 s=n,
1523 -0.12117137 0.13131674 w=5 h=5 s=n,
1524 -0.122422375 0.13565907 w=5 h=5 s=n,
1525 -0.12210027 0.13794063 w=5 h=5 s=n,
1526 -0.13226348 0.14721605 w=5 h=5 s=n,
1527 -0.13503031 0.13648993 w=5 h=5 s=n,
1528 -0.13497616 0.13842003 w=5 h=5 s=n,
1529 -0.13560428 0.13566805 w=5 h=5 s=n,
1530 -0.13563977 0.1369328 w=5 h=5 s=n,
1531 -0.14494124 0.09344299 w=5 h=5 s=n,
1532 -0.14526334 0.09116143 w=5 h=5 s=n,
1533 -0.15485905 0.1039119 w=5 h=5 s=n,
1534 -0.16011983 0.114836 w=5 h=5 s=n,
1535 -0.16145119 0.11781131 w=5 h=5 s=n,
1536 -0.16315915 0.12269236 w=5 h=5 s=n,
1537 -0.1632133 0.12076226 w=5 h=5 s=n,
1538 -0.16352308 0.11524608 w=5 h=5 s=n,
1539 -0.16410784 0.11646036 w=5 h=5 s=n,
1540 -0.1647134 0.11781365 w=5 h=5 s=n,
1541 -0.16566475 0.122596405 w=5 h=5 s=n,
1542 -0.16629791 0.15054971 w=5 h=5 s=n,
1543 -0.16635206 0.1486196 w=5 h=5 s=n,
1544 -0.16666184 0.14310342 w=5 h=5 s=n,
1545 -0.16724661 0.1443177 w=5 h=5 s=n,
1546 -0.16785218 0.145671 w=5 h=5 s=n,
1547 -0.16880353 0.15045375 w=5 h=5 s=n,
1548 -0.16878536 0.1501304 w=5 h=5 s=n,
1549 -0.16874988 0.14886564 w=5 h=5 s=n,
1550 -0.17206849 0.15279567 w=5 h=5 s=n,
1551 -0.17225371 0.15313081 w=5 h=5 s=n,
1552 -0.1739859 0.15648377 w=5 h=5 s=n,
1553 -0.20409659 0.17633754 w=5 h=5 s=n,
1554 -0.20314524 0.17155479 w=5 h=5 s=n,
1555 -0.20515801 0.17456712 w=5 h=5 s=n,
1556 -0.205897 0.1757432 w=5 h=5 s=n,
1557 -0.20991884 0.18545279 w=5 h=5 s=n,
1558 -0.1990741 0.15446034 w=5 h=5 s=n,
1559 -0.19798231 0.15103488 w=5 h=5 s=n,
1560 -0.19821353 0.14987242 w=5 h=5 s=n,
1561 -0.20098622 0.15402204 w=5 h=5 s=n,
1562 -0.21162248 0.1720531 w=5 h=5 s=n,
1563 -0.21160643 0.18895712 w=5 h=5 s=n,
1564 -0.2007617 0.15796466 w=5 h=5 s=n,
1565 -0.19966991 0.1545392 w=5 h=5 s=n,
1566 -0.19990113 0.15337676 w=5 h=5 s=n,
1567 -0.20267381 0.15752636 w=5 h=5 s=n,
1568 -0.21331006 0.17555743 w=5 h=5 s=n,
1569 -0.20928822 0.16584785 w=5 h=5 s=n,
1570 -0.20946416 0.16529587 w=5 h=5 s=n,
1571 -0.21354146 0.17597611 w=5 h=5 s=n,
1572 -0.20951962 0.16626653 w=5 h=5 s=n,
1573 -0.20969556 0.16571455 w=5 h=5 s=n,
1574 -0.20800796 0.16221021 w=5 h=5 s=n,
1575 -0.1742507 0.074445166 w=5 h=5 s=n,
1576 -0.17447145 0.07288156 w=5 h=5 s=n,
1577 -0.17481185 0.07117027 w=5 h=5 s=n,
1578 -0.17490721 0.070752464 w=5 h=5 s=n,
1579 -0.17741272 0.06838371 w=5 h=5 s=n,
1580 -0.22988707 0.09738525 w=5 h=5 s=n,
1581 -0.23096125 0.098060206 w=5 h=5 s=n,
1582 -0.22883247 0.09654976 w=5 h=5 s=n,
1583 -0.22060941 0.09036127 w=5 h=5 s=n,
1584 -0.2316564 0.0984444 w=5 h=5 s=n,
1585 -0.22952762 0.09693395 w=5 h=5 s=n,
1586 -0.22130457 0.09074547 w=5 h=5 s=n,
1587 -0.22023039 0.090070516 w=5 h=5 s=n,
1588 -0.22004236 0.08953315 w=5 h=5 s=n,
1589 -0.15490453 0.016835662 w=5 h=5 s=n,
1590 -0.1503116 0.011977573 w=5 h=5 s=n,
1591 -0.150193 0.01169126 w=5 h=5 s=n,
1592 -0.14544089 0.002492631 w=5 h=5 s=n,
1593 -0.14427319 -5.6640466E-4 w=5 h=5 s=n,
1594 -0.18660606 0.017878087 w=5 h=5 s=n,
1595 -0.18185395 0.008679458 w=5 h=5 s=n,
1596 -0.18068625 0.0056204223 w=5 h=5 s=n,
1597 -0.17060183 0.003318721 w=5 h=5 s=n,
1598 -0.17348154 0.0022194819 w=5 h=5 s=n,
1599 -0.17594707 0.0013567552 w=5 h=5 s=n,
1600 -0.18512483 -0.032033768 w=5 h=5 s=n,
1601 -0.18156153 -0.0326392 w=5 h=5 s=n,
1602 -0.1895028 -0.036192693 w=5 h=5 s=n,
1603 -0.19607277 -0.038914062 w=5 h=5 s=n,
1604 -0.19943677 -0.04009118 w=5 h=5 s=n,
1605 -0.20117036 -0.040643718 w=5 h=5 s=n,
1606 -0.20098639 -0.040976577 w=5 h=5 s=n,
1607 -0.20058239 -0.043354303 w=5 h=5 s=n,
1608 -0.20503327 -0.04549432 w=5 h=5 s=n,
1609 -0.20659596 -0.046193577 w=5 h=5 s=n,
1610 -0.2076886 -0.04664617 w=5 h=5 s=n,
1611 -0.20950554 -0.04733973 w=5 h=5 s=n,
1612 -0.20961358 -0.04739944 w=5 h=5 s=n,
1613 -0.21051194 -0.04756943 w=5 h=5 s=n,
1614 -0.21061997 -0.04762914 w=5 h=5 s=n,
1615 -0.20780507 -0.04715087 w=5 h=5 s=n,
1616 -0.20868641 -0.047637973 w=5 h=5 s=n,
1617 -0.20874192 -0.0476647 w=5 h=5 s=n,
1618 -0.21358356 -0.049670175 w=5 h=5 s=n,
1619 -0.21425225 -0.0583747 w=5 h=5 s=n,
1620 -0.2124353 -0.05768114 w=5 h=5 s=n,
1621 -0.21077925 -0.057253957 w=5 h=5 s=n,
1622 -0.21437268 -0.06046524 w=5 h=5 s=n,
1623 -0.21431717 -0.06043851 w=5 h=5 s=n,
1624 -0.21322453 -0.05998592 w=5 h=5 s=n,
1625 -0.21149096 -0.059433382 w=5 h=5 s=n,
1626 -0.21240743 -0.06025239 w=5 h=5 s=n,
1627 -0.2111762 -0.059378784 w=5 h=5 s=n,
1628 -0.20961352 -0.05867953 w=5 h=5 s=n,
1629 -0.2062495 -0.05750241 w=5 h=5 s=n,
1630 -0.20536816 -0.05701531 w=5 h=5 s=n,
1631 -0.19195193 -0.052320767 w=5 h=5 s=n,
1632 -0.20882942 -0.060082316 w=5 h=5 s=n,
1633 -0.20794807 -0.059595212 w=5 h=5 s=n,
1634 -0.19453183 -0.05490067 w=5 h=5 s=n,
1635 -0.19361536 -0.054081663 w=5 h=5 s=n,
1636 -0.19350733 -0.054021955 w=5 h=5 s=n,
1637 -0.18693736 -0.05130058 w=5 h=5 s=n,
1638 -0.18323693 -0.049888052 w=5 h=5 s=n,
1639 -0.1807714 -0.049025327 w=5 h=5 s=n,
1640 -0.14127523 -0.034612205 w=5 h=5 s=n,
1641 -0.14641051 -0.0445525 w=5 h=5 s=n,
1642 -0.1473841 -0.046437066 w=5 h=5 s=n,
1643 -0.15218611 -0.053744305 w=5 h=5 s=n,
1644 -0.1531597 -0.055628866 w=5 h=5 s=n,
1645 -0.15164952 -0.053500477 w=5 h=5 s=n,
1646 -0.15134642 -0.055284463 w=5 h=5 s=n,
1647 -0.16026936 -0.06849285 w=5 h=5 s=n,
1648 -0.15875919 -0.06636446 w=5 h=5 s=n,
1649 -0.15845609 -0.06814844 w=5 h=5 s=n,
1650 -0.15268049 -0.058956645 w=5 h=5 s=n,
1651 -0.1537705 -0.061812203 w=5 h=5 s=n,
1652 -0.12202019 -0.120589785 w=5 h=5 s=n,
1653 -0.12164971 -0.11840927 w=5 h=5 s=n,
1654 -0.12035009 -0.13381685 w=5 h=5 s=n,
1655 -0.11971664 -0.12630689 w=5 h=5 s=n,
1656 -0.119601734 -0.12654547 w=5 h=5 s=n,
1657 -0.12030012 -0.1347067 w=5 h=5 s=n,
1658 -0.119666666 -0.12719673 w=5 h=5 s=n,
1659 -0.11955176 -0.12743531 w=5 h=5 s=n,
1660 -0.11955176 -0.11851508 w=5 h=5 s=n,
1661 -0.11948608 -0.11617388 w=5 h=5 s=n,
1662 -0.11938108 -0.11642738 w=5 h=5 s=n,
1663 -0.1172427 -0.092854634 w=5 h=5 s=n,
1664 -0.11563484 -0.09576384 w=5 h=5 s=n,
1665 -0.11219383 -0.09119154 w=5 h=5 s=n,
1666 -0.11137639 -0.09137072 w=5 h=5 s=n,
1667 -0.110599086 -0.09246623 w=5 h=5 s=n,
1668 -0.11085249 -0.09021724 w=5 h=5 s=n,
1669 -0.10924264 -0.047464985 w=5 h=5 s=n,
1670 -0.1108505 -0.044555783 w=5 h=5 s=n,
1671 -0.11095551 -0.044302285 w=5 h=5 s=n,
1672 -0.1115265 -0.041431703 w=5 h=5 s=n,
1673 -0.1123038 -0.04033619 w=5 h=5 s=n,
1674 -0.1129098 -0.03676953 w=5 h=5 s=n,
1675 -0.10997016 -0.039113823 w=5 h=5 s=n,
1676 -0.10619522 -0.03593498 w=5 h=5 s=n,
1677 -0.107259296 -0.03480947 w=5 h=5 s=n,
1678 -0.10761407 -0.034338064 w=5 h=5 s=n,
1679 -0.108126104 -0.033523165 w=5 h=5 s=n,
1680 -0.109135814 -0.03169623 w=5 h=5 s=n,
1681 -0.10925071 -0.03145764 w=5 h=5 s=n,
1682 -0.11025749 -0.028820155 w=5 h=5 s=n,
1683 -0.11066848 -0.027530687 w=5 h=5 s=n,
1684 -0.11192208 -0.02317937 w=5 h=5 s=n,
1685 -0.11350683 -0.017035795 w=5 h=5 s=n,
1686 -0.113809936 -0.015251811 w=5 h=5 s=n,
1687 -0.10365089 -0.012631257 w=5 h=5 s=n,
1688 -0.1022316 -0.013040146 w=5 h=5 s=n,
1689 -0.09999239 -0.014277716 w=5 h=5 s=n,
1690 -0.0993225 -0.014410965 w=5 h=5 s=n,
1691 -0.099092856 -0.01446338 w=5 h=5 s=n,
1692 -0.0970195 -0.015686419 w=5 h=5 s=n,
1693 -0.10026453 -0.012381026 w=5 h=5 s=n,
1694 -0.1008367 -0.01195042 w=5 h=5 s=n,
1695 -0.10377634 -0.00960613 w=5 h=5 s=n,
1696 -0.10192891 -0.010432803 w=5 h=5 s=n,
1697 -0.07215705 -0.009702042 w=5 h=5 s=n,
1698 -0.062004708 -0.010272185 w=5 h=5 s=n,
1699 -0.055573482 -0.010814653 w=5 h=5 s=n,
1700 -0.017355233 0.0038085845 w=5 h=5 s=n,
1701 -0.030843979 0.003430127 w=5 h=5 s=n,
1702 -0.04099632 0.0040002703 w=5 h=5 s=n,
1703 -0.03268905 0.005411732 w=5 h=5 s=n,
1704 5.90099E-4 0.01702235 w=5 h=5 s=n,
1705 -0.0077171708 0.0156108895 w=5 h=5 s=n,
1706 -0.00838706 0.015744139 w=5 h=5 s=n,
1707 -0.008046663 0.017455425 w=5 h=5 s=n,
1708 -0.00648372 0.018002322 w=5 h=5 s=n,
1709 -0.06806954 0.012220463 w=5 h=5 s=n,
1710 -0.0678488 0.01378407 w=5 h=5 s=n,
1711 -0.06782546 0.013795311 w=5 h=5 s=n,
1712 -0.04191532 0.025389351 w=5 h=5 s=n,
1713 -0.049706902 0.022415148 w=5 h=5 s=n,
1714 -0.051269848 0.02186825 w=5 h=5 s=n,
1715 -0.052283674 0.021636851 w=5 h=5 s=n,
1716 -0.055578966 0.021076959 w=5 h=5 s=n,
1717 -0.065182805 0.020537619 w=5 h=5 s=n,
1718 -0.06041603 0.02300019 w=5 h=5 s=n,
1719 -0.08632617 0.011406151 w=5 h=5 s=n,
1720 -0.09451082 0.008797465 w=5 h=5 s=n,
1721 -0.094568156 0.00891651 w=5 h=5 s=n,
1722 -0.094551735 0.009013144 w=5 h=5 s=n,
1723 -0.094375804 0.009565123 w=5 h=5 s=n,
1724 -0.07682108 0.020595485 w=5 h=5 s=n,
1725 -0.06808028 0.025751552 w=5 h=5 s=n,
1726 -0.07284705 0.02328898 w=5 h=5 s=n,
1727 -0.072870396 0.023277739 w=5 h=5 s=n,
1728 -0.076808296 0.021899806 w=5 h=5 s=n,
1729 -0.07942109 0.021147076 w=5 h=5 s=n,
1730 -0.08038581 0.020926882 w=5 h=5 s=n,
1731 -0.060063574 0.036220938 w=5 h=5 s=n,
1732 -0.044872973 0.046370972 w=5 h=5 s=n,
1733 -0.053613774 0.041214906 w=5 h=5 s=n,
1734 -0.06136028 0.04338929 w=5 h=5 s=n,
1735 -0.06383803 0.042443484 w=5 h=5 s=n,
1736 -0.063803844 0.042685628 w=5 h=5 s=n,
1737 -0.049067587 0.09708041 w=5 h=5 s=n,
1738 -0.044948842 0.103635356 w=5 h=5 s=n,
1739 -0.042863633 0.10657418 w=5 h=5 s=n,
1740 -0.07379836 0.08018943 w=5 h=5 s=n,
1741 -0.07391695 0.08047575 w=5 h=5 s=n,
1742 -0.07385589 0.080602534 w=5 h=5 s=n,
1743 -0.092365354 0.088642955 w=5 h=5 s=n,
1744 -0.09242641 0.088516176 w=5 h=5 s=n,
1745 -0.09654516 0.08196123 w=5 h=5 s=n,
1746 -0.116793536 0.05165739 w=5 h=5 s=n,
1747 -0.12695259 0.049036838 w=5 h=5 s=n,
1748 -0.13572152 0.06863348 w=5 h=5 s=n,
1749 -0.13509339 0.071385466 w=5 h=5 s=n,
1750 -0.13232656 0.0821116 w=5 h=5 s=n,
1751 -0.114431195 0.1442278 w=5 h=5 s=n,
1752 -0.10227581 0.18236487 w=5 h=5 s=n,
1753 -0.10378969 0.17839895 w=5 h=5 s=n,
1754 -0.10561283 0.17486991 w=5 h=5 s=n,
1755 -0.109015994 0.16945381 w=5 h=5 s=n,
1756 -0.110267 0.17379615 w=5 h=5 s=n,
1757 -0.109944895 0.17607771 w=5 h=5 s=n,
1758 -0.13276196 0.16467047 w=5 h=5 s=n,
1759 -0.13339008 0.16191848 w=5 h=5 s=n,
1760 -0.13342558 0.16318324 w=5 h=5 s=n,
1761 -0.13331759 0.16703197 w=5 h=5 s=n,
1762 -0.13553178 0.14078154 w=5 h=5 s=n,
1763 -0.14295417 0.07490609 w=5 h=5 s=n,
1764 -0.1448151 0.096968375 w=5 h=5 s=n,
1765 -0.14483325 0.09729172 w=5 h=5 s=n,
1766 -0.16733618 0.16285887 w=5 h=5 s=n,
1767 -0.16739033 0.16092877 w=5 h=5 s=n,
1768 -0.16770011 0.1554126 w=5 h=5 s=n,
1769 -0.16828488 0.15662687 w=5 h=5 s=n,
1770 -0.16889045 0.15798016 w=5 h=5 s=n,
1771 -0.16984178 0.16276293 w=5 h=5 s=n,
1772 -0.17262936 0.18250822 w=5 h=5 s=n,
1773 -0.17159109 0.17019904 w=5 h=5 s=n,
1774 -0.17157294 0.1698757 w=5 h=5 s=n,
1775 -0.17153744 0.16861095 w=5 h=5 s=n,
1776 -0.17485607 0.17254096 w=5 h=5 s=n,
1777 -0.17504129 0.1728761 w=5 h=5 s=n,
1778 -0.17677346 0.17622906 w=5 h=5 s=n,
1779 -0.21277244 0.20355774 w=5 h=5 s=n,
1780 -0.2118211 0.198775 w=5 h=5 s=n,
1781 -0.21383387 0.20178732 w=5 h=5 s=n,
1782 -0.21457286 0.20296341 w=5 h=5 s=n,
1783 -0.2185947 0.212673 w=5 h=5 s=n,
1784 -0.21949385 0.21502852 w=5 h=5 s=n,
1785 -0.210818 0.18780832 w=5 h=5 s=n,
1786 -0.2125056 0.19131266 w=5 h=5 s=n,
1787 -0.2135517 0.1936505 w=5 h=5 s=n,
1788 -0.21265255 0.19129497 w=5 h=5 s=n,
1789 -0.20180783 0.16030252 w=5 h=5 s=n,
1790 -0.20071603 0.15687706 w=5 h=5 s=n,
1791 -0.20094725 0.1557146 w=5 h=5 s=n,
1792 -0.20371993 0.15986422 w=5 h=5 s=n,
1793 -0.21435618 0.17789528 w=5 h=5 s=n,
1794 -0.21458758 0.17831396 w=5 h=5 s=n,
1795 -0.2192153 0.18727177 w=5 h=5 s=n,
1796 -0.21816918 0.18493392 w=5 h=5 s=n,
1797 -0.21414734 0.17522435 w=5 h=5 s=n,
1798 -0.21432327 0.17467237 w=5 h=5 s=n,
1799 -0.2165507 0.1784484 w=5 h=5 s=n,
1800 -0.21192297 0.16949058 w=5 h=5 s=n,
1801 -0.21023537 0.16598624 w=5 h=5 s=n,
1802 -0.2173617 0.17665154 w=5 h=5 s=n,
1803 -0.21513428 0.17287551 w=5 h=5 s=n,
1804 -0.21490288 0.17245683 w=5 h=5 s=n,
1805 -0.21386787 0.1701438 w=5 h=5 s=n,
1806 -0.21390206 0.16990165 w=5 h=5 s=n,
1807 -0.21605183 0.1724475 w=5 h=5 s=n,
1808 -0.2163914 0.17289872 w=5 h=5 s=n,
1809 -0.20926508 0.16223343 w=5 h=5 s=n,
1810 -0.19862883 0.14420237 w=5 h=5 s=n,
1811 -0.19697385 0.14076576 w=5 h=5 s=n,
1812 -0.1934655 0.13292536 w=5 h=5 s=n,
1813 -0.19175754 0.1280443 w=5 h=5 s=n,
1814 -0.19210649 0.12390748 w=5 h=5 s=n,
1815 -0.23135965 0.16542691 w=5 h=5 s=n,
1816 -0.23289864 0.16724944 w=5 h=5 s=n,
1817 -0.23255907 0.16679822 w=5 h=5 s=n,
1818 -0.24788018 0.18300389 w=5 h=5 s=n,
1819 -0.24634118 0.18118136 w=5 h=5 s=n,
1820 -0.24356851 0.17703174 w=5 h=5 s=n,
1821 -0.24296294 0.17567846 w=5 h=5 s=n,
1822 -0.24297936 0.17558183 w=5 h=5 s=n,
1823 -0.24959674 0.181838 w=5 h=5 s=n,
1824 -0.23427564 0.16563234 w=5 h=5 s=n,
1825 -0.23212586 0.16308649 w=5 h=5 s=n,
1826 -0.23138687 0.1619104 w=5 h=5 s=n,
1827 -0.22892438 0.15773587 w=5 h=5 s=n,
1828 -0.22719221 0.15438291 w=5 h=5 s=n,
1829 -0.22660744 0.15316865 w=5 h=5 s=n,
1830 -0.22527607 0.15019333 w=5 h=5 s=n,
1831 -0.23349912 0.15638182 w=5 h=5 s=n,
1832 -0.24136204 0.16302146 w=5 h=5 s=n,
1833 -0.23474465 0.15676527 w=5 h=5 s=n,
1834 -0.1954915 0.11524584 w=5 h=5 s=n,
1835 -0.19347872 0.11223351 w=5 h=5 s=n,
1836 -0.1879442 0.10342539 w=5 h=5 s=n,
1837 -0.18775898 0.10309025 w=5 h=5 s=n,
1838 -0.18249822 0.09216615 w=5 h=5 s=n,
1839 -0.1812472 0.087823816 w=5 h=5 s=n,
1840 -0.18015787 0.08305115 w=5 h=5 s=n,
1841 -0.18006998 0.08260932 w=5 h=5 s=n,
1842 -0.17998484 0.07957435 w=5 h=5 s=n,
1843 -0.18211362 0.081084795 w=5 h=5 s=n,
1844 -0.18308873 0.081818655 w=5 h=5 s=n,
1845 -0.17522584 0.07517902 w=5 h=5 s=n,
1846 -0.17544658 0.07361542 w=5 h=5 s=n,
1847 -0.17578697 0.07190413 w=5 h=5 s=n,
1848 -0.17588234 0.07148632 w=5 h=5 s=n,
1849 -0.17838785 0.06911756 w=5 h=5 s=n,
1850 -0.2308622 0.09811911 w=5 h=5 s=n,
1851 -0.23193638 0.09879406 w=5 h=5 s=n,
1852 -0.23405756 0.0998608 w=5 h=5 s=n,
1853 -0.23192878 0.09835035 w=5 h=5 s=n,
1854 -0.22370572 0.09216187 w=5 h=5 s=n,
1855 -0.23429935 0.097634666 w=5 h=5 s=n,
1856 -0.2318982 0.096218266 w=5 h=5 s=n,
1857 -0.23082402 0.09554332 w=5 h=5 s=n,
1858 -0.23063599 0.09500595 w=5 h=5 s=n,
1859 -0.16141297 0.040960126 w=5 h=5 s=n,
1860 -0.15809436 0.037030093 w=5 h=5 s=n,
1861 -0.14849864 0.024279622 w=5 h=5 s=n,
1862 -0.14613052 0.018562445 w=5 h=5 s=n,
1863 -0.14537224 0.015240237 w=5 h=5 s=n,
1864 -0.14893556 0.015845668 w=5 h=5 s=n,
1865 -0.15901996 0.01814737 w=5 h=5 s=n,
1866 -0.19330585 0.0074020135 w=5 h=5 s=n,
1867 -0.18322143 0.005100312 w=5 h=5 s=n,
1868 -0.18610114 0.004001073 w=5 h=5 s=n,
1869 -0.18856667 0.0031383466 w=5 h=5 s=n,
1870 -0.21547325 -0.031182274 w=5 h=5 s=n,
1871 -0.21190993 -0.031787705 w=5 h=5 s=n,
1872 -0.21985121 -0.035341196 w=5 h=5 s=n,
1873 -0.22642118 -0.03806257 w=5 h=5 s=n,
1874 -0.22978519 -0.039239686 w=5 h=5 s=n,
1875 -0.23151876 -0.039792225 w=5 h=5 s=n,
1876 -0.20649488 -0.043853015 w=5 h=5 s=n,
1877 -0.20491424 -0.043853015 w=5 h=5 s=n,
1878 -0.20813087 -0.045514766 w=5 h=5 s=n,
1879 -0.21094577 -0.045993038 w=5 h=5 s=n,
1880 -0.2372812 -0.04971098 w=5 h=5 s=n,
1881 -0.2313687 -0.049212266 w=5 h=5 s=n,
1882 -0.23293139 -0.049911525 w=5 h=5 s=n,
1883 -0.23402403 -0.050364114 w=5 h=5 s=n,
1884 -0.23584098 -0.051057674 w=5 h=5 s=n,
1885 -0.23684737 -0.051287375 w=5 h=5 s=n,
1886 -0.22591908 -0.051575586 w=5 h=5 s=n,
1887 -0.22310418 -0.051097315 w=5 h=5 s=n,
1888 -0.22398552 -0.05158442 w=5 h=5 s=n,
1889 -0.22404103 -0.051611148 w=5 h=5 s=n,
1890 -0.22888267 -0.05361662 w=5 h=5 s=n,
1891 -0.23884955 -0.05679335 w=5 h=5 s=n,
1892 -0.22355044 -0.0528469 w=5 h=5 s=n,
1893 -0.22254404 -0.0526172 w=5 h=5 s=n,
1894 -0.22106428 -0.05245047 w=5 h=5 s=n,
1895 -0.22324783 -0.05328398 w=5 h=5 s=n,
1896 -0.21328096 -0.050107248 w=5 h=5 s=n,
1897 -0.21473517 -0.055154942 w=5 h=5 s=n,
1898 -0.21498735 -0.055946156 w=5 h=5 s=n,
1899 -0.22144315 -0.06052679 w=5 h=5 s=n,
1900 -0.2338679 -0.0660865 w=5 h=5 s=n,
1901 -0.23168434 -0.065253 w=5 h=5 s=n,
1902 -0.23162702 -0.06537204 w=5 h=5 s=n,
1903 -0.23356646 -0.06637399 w=5 h=5 s=n,
1904 -0.22114173 -0.060814273 w=5 h=5 s=n,
1905 -0.24094388 -0.076209486 w=5 h=5 s=n,
1906 -0.23912695 -0.075515926 w=5 h=5 s=n,
1907 -0.2374709 -0.07508874 w=5 h=5 s=n,
1908 -0.24106432 -0.07830002 w=5 h=5 s=n,
1909 -0.24184091 -0.078884475 w=5 h=5 s=n,
1910 -0.21514928 -0.06104969 w=5 h=5 s=n,
1911 -0.21509378 -0.06102296 w=5 h=5 s=n,
1912 -0.21400113 -0.06057037 w=5 h=5 s=n,
1913 -0.21226756 -0.06001783 w=5 h=5 s=n,
1914 -0.21318403 -0.06083684 w=5 h=5 s=n,
1915 -0.21565054 -0.06291963 w=5 h=5 s=n,
1916 -0.21487395 -0.06233518 w=5 h=5 s=n,
1917 -0.21364272 -0.06146157 w=5 h=5 s=n,
1918 -0.21208003 -0.060762316 w=5 h=5 s=n,
1919 -0.20871602 -0.059585202 w=5 h=5 s=n,
1920 -0.21129593 -0.062165104 w=5 h=5 s=n,
1921 -0.2046641 -0.06561791 w=5 h=5 s=n,
1922 -0.20374763 -0.06479891 w=5 h=5 s=n,
1923 -0.2036396 -0.0647392 w=5 h=5 s=n,
1924 -0.19706962 -0.06201783 w=5 h=5 s=n,
1925 -0.19336918 -0.060605295 w=5 h=5 s=n,
1926 -0.19090365 -0.05974257 w=5 h=5 s=n,
1927 -0.19710831 -0.06709036 w=5 h=5 s=n,
1928 -0.18697605 -0.05637312 w=5 h=5 s=n,
1929 -0.18439615 -0.053793218 w=5 h=5 s=n,
1930 -0.18080272 -0.050581932 w=5 h=5 s=n,
1931 -0.17434692 -0.0460013 w=5 h=5 s=n,
1932 -0.1711303 -0.044339553 w=5 h=5 s=n,
1933 -0.16318902 -0.04078606 w=5 h=5 s=n,
1934 -0.14368118 -0.03270565 w=5 h=5 s=n,
1935 -0.14080149 -0.031606413 w=5 h=5 s=n,
1936 -0.14596972 -0.039831612 w=5 h=5 s=n,
1937 -0.14747989 -0.04196 w=5 h=5 s=n,
1938 -0.14874369 -0.0436393 w=5 h=5 s=n,
1939 -0.14253904 -0.036291502 w=5 h=5 s=n,
1940 -0.1476743 -0.0462318 w=5 h=5 s=n,
1941 -0.15344991 -0.055423602 w=5 h=5 s=n,
1942 -0.15496717 -0.05769435 w=5 h=5 s=n,
1943 -0.15370338 -0.056015052 w=5 h=5 s=n,
1944 -0.15467696 -0.057899617 w=5 h=5 s=n,
1945 -0.16178663 -0.0707636 w=5 h=5 s=n,
1946 -0.16325328 -0.07743433 w=5 h=5 s=n,
1947 -0.15747769 -0.068242535 w=5 h=5 s=n,
1948 -0.15856771 -0.07109809 w=5 h=5 s=n,
1949 -0.16120638 -0.076994926 w=5 h=5 s=n,
1950 -0.15640917 -0.067709036 w=5 h=5 s=n,
1951 -0.1492995 -0.054845054 w=5 h=5 s=n,
1952 -0.14413127 -0.046619855 w=5 h=5 s=n,
1953 -0.14279887 -0.053318273 w=5 h=5 s=n,
1954 -0.14219287 -0.056884933 w=5 h=5 s=n,
1955 -0.14919575 -0.0752305 w=5 h=5 s=n,
1956 -0.14655708 -0.06933367 w=5 h=5 s=n,
1957 -0.1455835 -0.06744911 w=5 h=5 s=n,
1958 -0.14399874 -0.073592685 w=5 h=5 s=n,
1959 -0.12933004 -0.099551 w=5 h=5 s=n,
1960 -0.12824 -0.09669544 w=5 h=5 s=n,
1961 -0.12782902 -0.09798491 w=5 h=5 s=n,
1962 -0.12781292 -0.09806583 w=5 h=5 s=n,
1963 -0.12526457 -0.09407404 w=5 h=5 s=n,
1964 -0.12425779 -0.09671153 w=5 h=5 s=n,
1965 -0.122691795 -0.10357262 w=5 h=5 s=n,
1966 -0.12260726 -0.10417138 w=5 h=5 s=n,
1967 -0.122672945 -0.106512584 w=5 h=5 s=n,
1968 -0.123553775 -0.11695526 w=5 h=5 s=n,
1969 -0.12329398 -0.11511502 w=5 h=5 s=n,
1970 -0.12290102 -0.12211222 w=5 h=5 s=n,
1971 -0.12290102 -0.13103245 w=5 h=5 s=n,
1972 -0.1200112 -0.14500432 w=5 h=5 s=n,
1973 -0.11937774 -0.13749434 w=5 h=5 s=n,
1974 -0.119262844 -0.13773292 w=5 h=5 s=n,
1975 -0.11379459 -0.10367297 w=5 h=5 s=n,
1976 -0.11218673 -0.106582165 w=5 h=5 s=n,
1977 -0.108599745 -0.11597907 w=5 h=5 s=n,
1978 -0.11204786 -0.10516074 w=5 h=5 s=n,
1979 -0.108606845 -0.10058844 w=5 h=5 s=n,
1980 -0.10859627 -0.10061207 w=5 h=5 s=n,
1981 -0.112183265 -0.09121516 w=5 h=5 s=n,
1982 -0.112835206 -0.089352004 w=5 h=5 s=n,
1983 -0.11291974 -0.08875324 w=5 h=5 s=n,
1984 -0.11256497 -0.089224644 w=5 h=5 s=n,
1985 -0.11136582 -0.09139434 w=5 h=5 s=n,
1986 -0.11024342 -0.07333157 w=5 h=5 s=n,
1987 -0.11025951 -0.07325065 w=5 h=5 s=n,
1988 -0.1134362 -0.054554004 w=5 h=5 s=n,
1989 -0.11198198 -0.04950631 w=5 h=5 s=n,
1990 -0.11037319 -0.046595417 w=5 h=5 s=n,
1991 -0.109309115 -0.04772093 w=5 h=5 s=n,
1992 -0.1076679 -0.04955745 w=5 h=5 s=n,
1993 -0.08490663 -0.07651222 w=5 h=5 s=n,
1994 -0.08648138 -0.07441975 w=5 h=5 s=n,
1995 -0.088089235 -0.071510546 w=5 h=5 s=n,
1996 -0.088194236 -0.07125705 w=5 h=5 s=n,
1997 -0.088765234 -0.068386465 w=5 h=5 s=n,
1998 -0.10668823 -0.04221661 w=5 h=5 s=n,
1999 -0.108329445 -0.04038009 w=5 h=5 s=n,
2000 -0.10966185 -0.03368167 w=5 h=5 s=n,
2001 -0.10908967 -0.034112275 w=5 h=5 s=n,
2002 -0.1029133 -0.039037768 w=5 h=5 s=n,
2003 -0.093086444 -0.047335804 w=5 h=5 s=n,
2004 -0.09636837 -0.044233013 w=5 h=5 s=n,
2005 -0.09743245 -0.043107502 w=5 h=5 s=n,
2006 -0.09778722 -0.042636096 w=5 h=5 s=n,
2007 -0.09829925 -0.0418212 w=5 h=5 s=n,
2008 -0.09930897 -0.039994262 w=5 h=5 s=n,
2009 -0.09942386 -0.039755672 w=5 h=5 s=n,
2010 -0.100430645 -0.03711819 w=5 h=5 s=n,
2011 -0.100841634 -0.03582872 w=5 h=5 s=n,
2012 -0.10209523 -0.031477403 w=5 h=5 s=n,
2013 -0.10367998 -0.02533383 w=5 h=5 s=n,
2014 -0.10398309 -0.023549844 w=5 h=5 s=n,
2015 -0.093824044 -0.02092929 w=5 h=5 s=n,
2016 -0.09240475 -0.02133818 w=5 h=5 s=n,
2017 -0.09016554 -0.02257575 w=5 h=5 s=n,
2018 -0.09683264 -0.014405443 w=5 h=5 s=n,
2019 -0.097404815 -0.013974838 w=5 h=5 s=n,
2020 -0.10034446 -0.011630548 w=5 h=5 s=n,
2021 -0.098497026 -0.012457221 w=5 h=5 s=n,
2022 -0.050458025 -0.037274756 w=5 h=5 s=n,
2023 -0.05388991 -0.035250336 w=5 h=5 s=n,
2024 -0.04525768 -0.039113015 w=5 h=5 s=n,
2025 -0.09329668 -0.014295479 w=5 h=5 s=n,
2026 -0.09622803 -0.0126753785 w=5 h=5 s=n,
2027 -0.09830138 -0.011452339 w=5 h=5 s=n,
2028 -0.05657564 -0.014043585 w=5 h=5 s=n,
2029 -0.0529153 -0.014665502 w=5 h=5 s=n,
2030 -0.04390593 -0.016457578 w=5 h=5 s=n,
2031 -0.06314768 -0.011494118 w=5 h=5 s=n,
2032 -0.052995335 -0.012064261 w=5 h=5 s=n,
2033 -0.04656411 -0.012606729 w=5 h=5 s=n,
2034 -0.045251273 -0.01279207 w=5 h=5 s=n,
2035 -0.054260645 -0.010999994 w=5 h=5 s=n,
;
VLABELS
2 'CC1-IV' x=-10 y=21 f='Times New Roman-PLAIN-10',
3 'CC1-IV-SCCfus' x=-27 y=-38,
4 'CC1-IV-SCCfus-PVL' x=-39 y=42,
5 'CC1-V-PVL' x=-21 y=22,
6 'CC1-V-SCCfus-PVL' x=-39 y=37,
7 'CC1-V-SCCfus' x=-28 y=23,
8 'ST188-IV-WA38' x=-33 y=23,
9 'ST188-V' x=-17 y=23,
10 'ST6-V' x=-13 y=28,
11 'ST1048-IV-ACME' x=-39 y=23,
12 'CC7-IV' x=-16 y=13,
13 'CC7-V' x=-15 y=23,
14 'CC12-IV' x=-20 y=18,
15 'CC12-WA59' x=-29 y=23,
16 'ST59-IV-PVL-WA55' x=-47 y=23,
17 'ST59-VT-PVL-Taiwan' x=-50 y=22,
18 'ST59-IV-V-WA15' x=-42 y=22,
19 'CC59-IV-PVL-USA1000' x=-56 y=7,
20 'ST87-IV-WA24' x=-38 y=22,
21 'ST59-V' x=-22 y=36,
22 'ST59-IV-WA73' x=-40 y=1,
23 'CC59-V-PVL' x=-35 y=21,
24 'ST1303-IV' x=-31 y=20,
25 'CC75-IV' x=-26 y=20,
26 'ST883-IV-WA47' x=-80 y=14,
27 'ST93-IV' x=-45 y=14,
28 'ST93-IV-PVL-Queen' x=-96 y=13,
29 'ST93-V-PVL' x=-65 y=-7,
30 'CC152-V-PVL' x=-71 y=2,
31 'ST398-V-PVL' x=-71 y=12,
32 'ST398-V' x=-49 y=11,
33 'CC398-IV' x=-53 y=10,
34 'ST426-MSSA' x=-70 y=10,
35 'CC45-agrIV-V' x=-71 y=9,
36 'CC45-agrIV-IV-V' x=-84 y=8,
37 'CC45-agrIV-IV-WA23' x=-104 y=8,
38 'ST45-II-USA600' x=-82 y=7,
39 'ST45-IV-Berlin' x=-76 y=-14,
40 'ST45-V-WA4' x=-70 y=6,
41 'CC45-IV-ACME' x=-81 y=-10,
42 'ST30-IV-tst1' x=-66 y=4,
43 'ST36-II-UK-16' x=-74 y=-1,
44 'ST30-IV-PVL-SWP' x=-95 y=3,
45 'CC30-V-PVL' x=-68 y=3,
46 'CC509-ST207-V' x=-81 y=2,
47 'ST22-V' x=-44 y=6,
48 'ST22-V-PVL' x=-66 y=1,
49 'ST22-IV-PVL' x=-68 y=-5,
50 'ST22-IV-ACME' x=-78 y=-1,
51 'ST22-IV-Barnim' x=-79 y=-1,
52 'ST1774-IV-ACME' x=-87 y=-2,
53 'CC121-V-WA22' x=-78 y=-2,
54 'CC361-VIII-WA28' x=-47 y=-8,
55 'CC361-V' x=-27 y=-13,
56 'CC361-IV-WA29' x=-43 y=-14,
57 'CC8-VIII' x=-26 y=-14,
58 'ST8-IIABCIrish' x=-39 y=-14,
59 'CC8-V' x=-20 y=-15,
60 'ST8-IV-PVLACME-USA300' x=-65 y=-5,
61 'ST8-IV-PVL-USA300' x=-49 y=-25,
62 'ST250-I-Early' x=-33 y=20,
63 'ST247-I-North' x=-33 y=-16,
64 'ST239-III' x=-22 y=-16,
65 'CC8-IV-USA500' x=-37 y=-26,
66 'CC8-IV-UK14' x=-30 y=-21,
67 'CC8-IV-Lyon' x=-28 y=-16,
68 'ST254-Hannover' x=-34 y=-16,
69 'ST254-IV-V-Hann' x=-36 y=4,
70 'ST8-UK-12-13-IrishAR43' x=-51 y=-16,
71 'CC8-IV-UK-6' x=-26 y=4,
72 'CC8-IV-tst1' x=-22 y=-16,
73 'CC8-IV-PVL-sed' x=-31 y=-15,
74 'ST779' x=-10 y=-15,
75 'CC97-IV-WA54' x=-28 y=-45,
76 'CC97-V' x=-12 y=-15,
77 'CC97-I-V' x=-14 y=-14,
78 'CC97-V-ACME' x=-26 y=-14,
79 'ST72-IV-PVL-WA44' x=-37 y=-19,
80 'ST72-IV-USA700' x=-29 y=-13,
81 'CC5-II-ACME' x=-22 y=-13,
82 'CC5-III' x=9 y=-2,
83 'ST228-I' x=9 y=-2,
84 'ST5-I-Geraldine' x=10 y=-6,
85 'CC5-IV-PVL' x=10 y=-1,
86 'CC5-IV-Paediat' x=10 y=0,
87 'CC5-IV-VI' x=11 y=15,
88 'CC5-II-Rhine-Hesse' x=11 y=1,
89 'CC5-V' x=11 y=2,
90 'CC5-IVvar-Maltes' x=11 y=-8,
91 'CC5-VI-NewPaed' x=12 y=3,
92 'CC5-Ivar' x=12 y=4,
93 'CC5-IV-SCCfus' x=12 y=24,
94 'CC5-SCCMRSAZH47' x=12 y=5,
95 'CC5-ST835' x=12 y=26,
96 'CC5-V-PVL' x=12 y=-14,
97 'ST5-VIISCC-JCSC6082' x=12 y=7,
98 'ST573-V-WA10' x=12 y=8,
99 'ST772-V-PVL-Bengal' x=12 y=8,
100 'CC9-IV' x=12 y=9,
101 'CC20-V' x=11 y=10,
102 'ST834-IV-WA13' x=11 y=10,
103 'ST154-PVL' x=11 y=11,
104 'CC913-IV' x=11 y=11,
105 'CC80-IV' x=10 y=12,
106 'CC80-IV-PVL-Europ' x=10 y=13,
107 'CC15-MSSA' x=10 y=13,
108 'ST6-IV-WA51' x=9 y=14,
109 'CC88-V-PVL' x=9 y=-16,
110 'CC88-VI' x=-10 y=20,
111 'CC88-IV-WA2' x=-23 y=25,
112 'CC88-IV-PVL' x=-22 y=36,
113 'CC1-IV-PVL' x=-20 y=21,
;
EDGES
1 1 2 s=8 w=0.026264288 fg=0 0 204,
2 114 1 s=12 w=0.013494053 fg=0 0 204,
3 114 113 s=371 w=0.031234996 fg=0 0 204,
4 115 1 s=7 w=0.0064540636 fg=0 0 204,
5 116 114 s=7 w=0.0064540636 fg=0 0 204,
6 116 115 s=12 w=0.013494053 fg=0 0 204,
7 117 116 s=19 w=0.0041493196 fg=0 0 204,
8 118 114 s=19 w=0.0041493196 fg=0 0 204,
9 118 117 s=7 w=0.0064540636 fg=0 0 204,
10 119 116 s=11 w=0.010168338 fg=0 0 204,
11 120 117 s=11 w=0.010168338 fg=0 0 204,
12 120 119 s=19 w=0.0041493196 fg=0 0 204,
13 121 120 s=33 w=0.029550508 fg=0 0 204,
14 122 117 s=33 w=0.029550508 fg=0 0 204,
15 122 121 s=11 w=0.010168338 fg=0 0 204,
16 123 118 s=33 w=0.029550508 fg=0 0 204,
17 123 122 s=7 w=0.0064540636 fg=0 0 204,
18 124 121 s=41 w=0.0033425172 fg=0 0 204,
19 125 122 s=41 w=0.0033425172 fg=0 0 204,
20 125 124 s=11 w=0.010168338 fg=0 0 204,
21 126 123 s=41 w=0.0033425172 fg=0 0 204,
22 126 125 s=7 w=0.0064540636 fg=0 0 204,
23 127 121 s=32 w=0.004365338 fg=0 0 204,
24 128 124 s=32 w=0.004365338 fg=0 0 204,
25 128 127 s=41 w=0.0033425172 fg=0 0 204,
26 129 128 s=51 w=9.89539E-4 fg=0 0 204,
27 130 124 s=51 w=9.89539E-4 fg=0 0 204,
28 130 129 s=32 w=0.004365338 fg=0 0 204,
29 131 125 s=51 w=9.89539E-4 fg=0 0 204,
30 131 130 s=11 w=0.010168338 fg=0 0 204,
31 132 126 s=51 w=9.89539E-4 fg=0 0 204,
32 132 131 s=7 w=0.0064540636 fg=0 0 204,
33 133 128 s=40 w=0.009618969 fg=0 0 204,
34 134 129 s=40 w=0.009618969 fg=0 0 204,
35 134 133 s=51 w=9.89539E-4 fg=0 0 204,
36 135 134 s=56 w=0.003109539 fg=0 0 204,
37 136 129 s=56 w=0.003109539 fg=0 0 204,
38 136 135 s=40 w=0.009618969 fg=0 0 204,
39 137 130 s=56 w=0.003109539 fg=0 0 204,
40 137 136 s=32 w=0.004365338 fg=0 0 204,
41 138 131 s=56 w=0.003109539 fg=0 0 204,
42 138 137 s=11 w=0.010168338 fg=0 0 204,
43 139 132 s=56 w=0.003109539 fg=0 0 204,
44 139 138 s=7 w=0.0064540636 fg=0 0 204,
45 140 120 s=18 w=0.001477013 fg=0 0 204,
46 141 121 s=18 w=0.001477013 fg=0 0 204,
47 141 140 s=33 w=0.029550508 fg=0 0 204,
48 142 127 s=18 w=0.001477013 fg=0 0 204,
49 142 141 s=32 w=0.004365338 fg=0 0 204,
50 143 128 s=18 w=0.001477013 fg=0 0 204,
51 143 142 s=41 w=0.0033425172 fg=0 0 204,
52 144 133 s=18 w=0.001477013 fg=0 0 204,
53 144 143 s=40 w=0.009618969 fg=0 0 204,
54 145 134 s=18 w=0.001477013 fg=0 0 204,
55 145 144 s=51 w=9.89539E-4 fg=0 0 204,
56 146 135 s=18 w=0.001477013 fg=0 0 204,
57 146 145 s=56 w=0.003109539 fg=0 0 204,
58 147 140 s=24 w=2.3555294E-4 fg=0 0 204,
59 148 141 s=24 w=2.3555294E-4 fg=0 0 204,
60 148 147 s=33 w=0.029550508 fg=0 0 204,
61 149 142 s=24 w=2.3555294E-4 fg=0 0 204,
62 149 148 s=32 w=0.004365338 fg=0 0 204,
63 150 143 s=24 w=2.3555294E-4 fg=0 0 204,
64 150 149 s=41 w=0.0033425172 fg=0 0 204,
65 151 144 s=24 w=2.3555294E-4 fg=0 0 204,
66 151 150 s=40 w=0.009618969 fg=0 0 204,
67 152 145 s=24 w=2.3555294E-4 fg=0 0 204,
68 152 151 s=51 w=9.89539E-4 fg=0 0 204,
69 153 146 s=24 w=2.3555294E-4 fg=0 0 204,
70 153 152 s=56 w=0.003109539 fg=0 0 204,
71 154 135 s=24 w=2.3555294E-4 fg=0 0 204,
72 154 153 s=18 w=0.001477013 fg=0 0 204,
73 155 147 s=28 w=6.830127E-4 fg=0 0 204,
74 156 148 s=28 w=6.830127E-4 fg=0 0 204,
75 156 155 s=33 w=0.029550508 fg=0 0 204,
76 157 149 s=28 w=6.830127E-4 fg=0 0 204,
77 157 156 s=32 w=0.004365338 fg=0 0 204,
78 158 150 s=28 w=6.830127E-4 fg=0 0 204,
79 158 157 s=41 w=0.0033425172 fg=0 0 204,
80 159 151 s=28 w=6.830127E-4 fg=0 0 204,
81 159 158 s=40 w=0.009618969 fg=0 0 204,
82 160 152 s=28 w=6.830127E-4 fg=0 0 204,
83 160 159 s=51 w=9.89539E-4 fg=0 0 204,
84 161 153 s=28 w=6.830127E-4 fg=0 0 204,
85 161 160 s=56 w=0.003109539 fg=0 0 204,
86 162 154 s=28 w=6.830127E-4 fg=0 0 204,
87 162 161 s=18 w=0.001477013 fg=0 0 204,
88 163 161 s=55 w=3.5642931E-4 fg=0 0 204,
89 164 162 s=55 w=3.5642931E-4 fg=0 0 204,
90 164 163 s=18 w=0.001477013 fg=0 0 204,
91 165 154 s=55 w=3.5642931E-4 fg=0 0 204,
92 165 164 s=28 w=6.830127E-4 fg=0 0 204,
93 166 135 s=55 w=3.5642931E-4 fg=0 0 204,
94 166 165 s=24 w=2.3555294E-4 fg=0 0 204,
95 167 163 s=97 w=0.010491596 fg=0 0 204,
96 168 159 s=47 w=1.3213036E-4 fg=0 0 204,
97 169 160 s=47 w=1.3213036E-4 fg=0 0 204,
98 169 168 s=51 w=9.89539E-4 fg=0 0 204,
99 170 161 s=47 w=1.3213036E-4 fg=0 0 204,
100 170 169 s=56 w=0.003109539 fg=0 0 204,
101 171 163 s=47 w=1.3213036E-4 fg=0 0 204,
102 171 170 s=55 w=3.5642931E-4 fg=0 0 204,
103 172 167 s=47 w=1.3213036E-4 fg=0 0 204,
104 172 171 s=97 w=0.010491596 fg=0 0 204,
105 173 157 s=31 w=0.0024118002 fg=0 0 204,
106 174 158 s=31 w=0.0024118002 fg=0 0 204,
107 174 173 s=41 w=0.0033425172 fg=0 0 204,
108 175 159 s=31 w=0.0024118002 fg=0 0 204,
109 175 174 s=40 w=0.009618969 fg=0 0 204,
110 176 168 s=31 w=0.0024118002 fg=0 0 204,
111 176 175 s=47 w=1.3213036E-4 fg=0 0 204,
112 177 169 s=31 w=0.0024118002 fg=0 0 204,
113 177 176 s=51 w=9.89539E-4 fg=0 0 204,
114 178 170 s=31 w=0.0024118002 fg=0 0 204,
115 178 177 s=56 w=0.003109539 fg=0 0 204,
116 179 171 s=31 w=0.0024118002 fg=0 0 204,
117 179 178 s=55 w=3.5642931E-4 fg=0 0 204,
118 180 172 s=31 w=0.0024118002 fg=0 0 204,
119 180 179 s=97 w=0.010491596 fg=0 0 204,
120 181 180 s=179 w=0.0034479848 fg=0 0 204,
121 182 172 s=179 w=0.0034479848 fg=0 0 204,
122 182 181 s=31 w=0.0024118002 fg=0 0 204,
123 183 167 s=179 w=0.0034479848 fg=0 0 204,
124 183 182 s=47 w=1.3213036E-4 fg=0 0 204,
125 184 147 s=23 w=4.2855344E-4 fg=0 0 204,
126 185 155 s=23 w=4.2855344E-4 fg=0 0 204,
127 185 184 s=28 w=6.830127E-4 fg=0 0 204,
128 186 156 s=23 w=4.2855344E-4 fg=0 0 204,
129 186 185 s=33 w=0.029550508 fg=0 0 204,
130 187 157 s=23 w=4.2855344E-4 fg=0 0 204,
131 187 186 s=32 w=0.004365338 fg=0 0 204,
132 188 173 s=23 w=4.2855344E-4 fg=0 0 204,
133 188 187 s=31 w=0.0024118002 fg=0 0 204,
134 189 174 s=23 w=4.2855344E-4 fg=0 0 204,
135 189 188 s=41 w=0.0033425172 fg=0 0 204,
136 190 175 s=23 w=4.2855344E-4 fg=0 0 204,
137 190 189 s=40 w=0.009618969 fg=0 0 204,
138 191 176 s=23 w=4.2855344E-4 fg=0 0 204,
139 191 190 s=47 w=1.3213036E-4 fg=0 0 204,
140 192 177 s=23 w=4.2855344E-4 fg=0 0 204,
141 192 191 s=51 w=9.89539E-4 fg=0 0 204,
142 193 178 s=23 w=4.2855344E-4 fg=0 0 204,
143 193 192 s=56 w=0.003109539 fg=0 0 204,
144 194 179 s=23 w=4.2855344E-4 fg=0 0 204,
145 194 193 s=55 w=3.5642931E-4 fg=0 0 204,
146 195 180 s=23 w=4.2855344E-4 fg=0 0 204,
147 195 194 s=97 w=0.010491596 fg=0 0 204,
148 196 181 s=210 w=0.0033258838 fg=0 0 204,
149 197 182 s=210 w=0.0033258838 fg=0 0 204,
150 197 196 s=31 w=0.0024118002 fg=0 0 204,
151 198 183 s=210 w=0.0033258838 fg=0 0 204,
152 198 197 s=47 w=1.3213036E-4 fg=0 0 204,
153 199 167 s=210 w=0.0033258838 fg=0 0 204,
154 199 198 s=179 w=0.0034479848 fg=0 0 204,
155 200 185 s=27 w=0.0017448125 fg=0 0 204,
156 201 186 s=27 w=0.0017448125 fg=0 0 204,
157 201 200 s=33 w=0.029550508 fg=0 0 204,
158 202 187 s=27 w=0.0017448125 fg=0 0 204,
159 202 201 s=32 w=0.004365338 fg=0 0 204,
160 203 188 s=27 w=0.0017448125 fg=0 0 204,
161 203 202 s=31 w=0.0024118002 fg=0 0 204,
162 204 189 s=27 w=0.0017448125 fg=0 0 204,
163 204 203 s=41 w=0.0033425172 fg=0 0 204,
164 205 190 s=27 w=0.0017448125 fg=0 0 204,
165 205 204 s=40 w=0.009618969 fg=0 0 204,
166 206 191 s=27 w=0.0017448125 fg=0 0 204,
167 206 205 s=47 w=1.3213036E-4 fg=0 0 204,
168 207 192 s=27 w=0.0017448125 fg=0 0 204,
169 207 206 s=51 w=9.89539E-4 fg=0 0 204,
170 208 193 s=27 w=0.0017448125 fg=0 0 204,
171 208 207 s=56 w=0.003109539 fg=0 0 204,
172 209 194 s=27 w=0.0017448125 fg=0 0 204,
173 209 208 s=55 w=3.5642931E-4 fg=0 0 204,
174 210 195 s=27 w=0.0017448125 fg=0 0 204,
175 210 209 s=97 w=0.010491596 fg=0 0 204,
176 211 209 s=79 w=3.8031442E-4 fg=0 0 204,
177 212 210 s=79 w=3.8031442E-4 fg=0 0 204,
178 212 211 s=97 w=0.010491596 fg=0 0 204,
179 213 195 s=79 w=3.8031442E-4 fg=0 0 204,
180 213 212 s=27 w=0.0017448125 fg=0 0 204,
181 214 180 s=79 w=3.8031442E-4 fg=0 0 204,
182 214 213 s=23 w=4.2855344E-4 fg=0 0 204,
183 215 181 s=79 w=3.8031442E-4 fg=0 0 204,
184 215 214 s=179 w=0.0034479848 fg=0 0 204,
185 216 196 s=79 w=3.8031442E-4 fg=0 0 204,
186 216 215 s=210 w=0.0033258838 fg=0 0 204,
187 217 203 s=37 w=0.0015791118 fg=0 0 204,
188 218 204 s=37 w=0.0015791118 fg=0 0 204,
189 218 217 s=41 w=0.0033425172 fg=0 0 204,
190 219 205 s=37 w=0.0015791118 fg=0 0 204,
191 219 218 s=40 w=0.009618969 fg=0 0 204,
192 220 206 s=37 w=0.0015791118 fg=0 0 204,
193 220 219 s=47 w=1.3213036E-4 fg=0 0 204,
194 221 207 s=37 w=0.0015791118 fg=0 0 204,
195 221 220 s=51 w=9.89539E-4 fg=0 0 204,
196 222 208 s=37 w=0.0015791118 fg=0 0 204,
197 222 221 s=56 w=0.003109539 fg=0 0 204,
198 223 209 s=37 w=0.0015791118 fg=0 0 204,
199 223 222 s=55 w=3.5642931E-4 fg=0 0 204,
200 224 211 s=37 w=0.0015791118 fg=0 0 204,
201 224 223 s=79 w=3.8031442E-4 fg=0 0 204,
202 225 212 s=37 w=0.0015791118 fg=0 0 204,
203 225 224 s=97 w=0.010491596 fg=0 0 204,
204 226 223 s=69 w=0.0034076453 fg=0 0 204,
205 227 224 s=69 w=0.0034076453 fg=0 0 204,
206 227 226 s=79 w=3.8031442E-4 fg=0 0 204,
207 228 225 s=69 w=0.0034076453 fg=0 0 204,
208 228 227 s=97 w=0.010491596 fg=0 0 204,
209 229 212 s=69 w=0.0034076453 fg=0 0 204,
210 229 228 s=37 w=0.0015791118 fg=0 0 204,
211 230 213 s=69 w=0.0034076453 fg=0 0 204,
212 230 229 s=27 w=0.0017448125 fg=0 0 204,
213 231 214 s=69 w=0.0034076453 fg=0 0 204,
214 231 230 s=23 w=4.2855344E-4 fg=0 0 204,
215 232 215 s=69 w=0.0034076453 fg=0 0 204,
216 232 231 s=179 w=0.0034479848 fg=0 0 204,
217 233 226 s=76 w=0.0032743262 fg=0 0 204,
218 234 227 s=76 w=0.0032743262 fg=0 0 204,
219 234 233 s=79 w=3.8031442E-4 fg=0 0 204,
220 235 228 s=76 w=0.0032743262 fg=0 0 204,
221 235 234 s=97 w=0.010491596 fg=0 0 204,
222 236 229 s=76 w=0.0032743262 fg=0 0 204,
223 236 235 s=37 w=0.0015791118 fg=0 0 204,
224 237 230 s=76 w=0.0032743262 fg=0 0 204,
225 237 236 s=27 w=0.0017448125 fg=0 0 204,
226 238 231 s=76 w=0.0032743262 fg=0 0 204,
[truncated: 159,555 more chars]
